# Supplementary material for: In Silico and In Vitro Evaluation of the Molecular Mimicry of the SARS-CoV-2 Spike Protein by Common Short Constituent Sequences (cSCSs) in the Human Proteome: Toward Safer Epitope Design for Vaccine Development
Source: MDPI journal article supplement (doi:10.3390/vaccines12050539), 2024-05-14
Supplement: s1 [file s1]

**a**

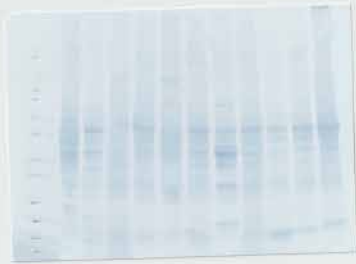

**Amido black**

**b**

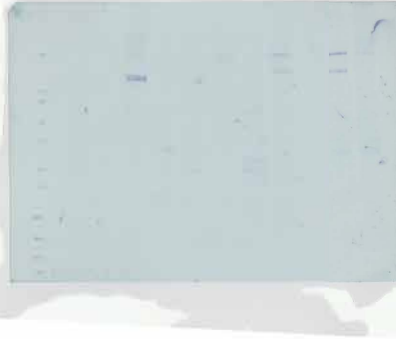

**Anti-P2 antibody**

**c**

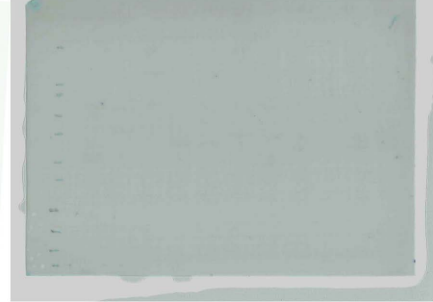

**Anti-SARS-CoV-2 antibody  
(Commercial)**

**d**

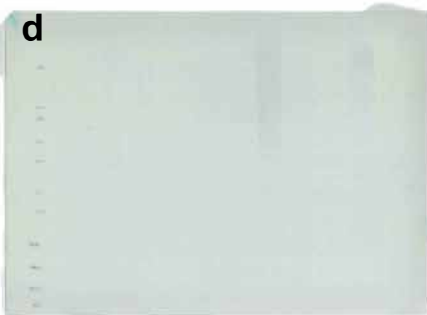

**Anti-P1 antibody**

**e**

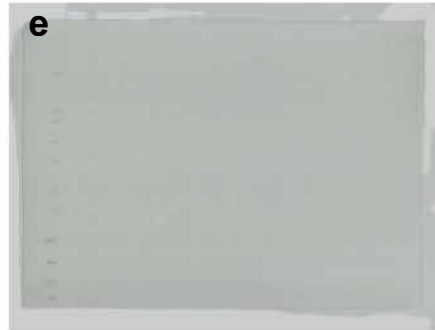

**Anti-P3 antibody**

**Figure S1. Original  
pictures for Figure 9.**
