# Supplementary material for: In Silico and In Vitro Evaluation of the Molecular Mimicry of the SARS-CoV-2 Spike Protein by Common Short Constituent Sequences (cSCSs) in the Human Proteome: Toward Safer Epitope Design for Vaccine Development
Source: Vaccines (Basel). 2024 May 14;12(5):539. doi: 10.3390/vaccines12050539 (PMC11125730; doi:10.3390/vaccines12050539)
Supplement: Supplementary file 1 [file vaccines-12-00539-s001.zip]

Archive with 5 entries (5 files):
- Figure S1 Original pictures for Figure 9.pdf
- Supplementary File S1 SARS-CoV-2 Spike vs. Human Original Text.txt
- Supplementary File S2 Spike vs. Human Excel #1.xlsm
- Supplementary File S3 Spike vs. Human Excel #2.xlsm
- Supplementary File S4 Excel Programming for Informatics.pdf
