# Supplementary material for: In Silico and In Vitro Evaluation of the Molecular Mimicry of the SARS-CoV-2 Spike Protein by Common Short Constituent Sequences (cSCSs) in the Human Proteome: Toward Safer Epitope Design for Vaccine Development
Source: Vaccines (Basel). 2024 May 14;12(5):539. doi: 10.3390/vaccines12050539 (PMC11125730; doi:10.3390/vaccines12050539)
Supplement: Supplementary file 1 [file vaccines-12-00539-s001.zip › Supplementary File S1 SARS-CoV-2 Spike vs. Human Original Text.txt]

>NP_001243779.1 titin isoform N2BA [Homo sapiens]
 >SarsCov2Spike_Specifiedy_by_Mizuno-san
 humanProteinID =  13243 , srsCov2ProteinID =  0
PLVSS
PPAYT
SLLIV
EFRVY
INITR
AGAAA
ALDPL
DPLSE
SNLKP
PKKST
STNLV
TLEIL
LEILD
ILDIT
AENSV
ISVTT
SVTTE
VSMTK
TKTSV
TPPIK
PSKPS
SKPSK
LSSTA
GKLQD
LQDVV
VEAEV
FKEEL
LGDIS
SEPVL
common SCSs =  29
>NP_001254479.2 titin isoform IC [Homo sapiens]
 >SarsCov2Spike_Specifiedy_by_Mizuno-san
 humanProteinID =  13868 , srsCov2ProteinID =  0
PLVSS
PPAYT
SLLIV
EFRVY
INITR
AGAAA
ALDPL
DPLSE
SNLKP
PKKST
STNLV
TLEIL
LEILD
ILDIT
AENSV
ISVTT
SVTTE
VSMTK
TKTSV
TPPIK
PSKPS
SKPSK
LSSTA
GKLQD
LQDVV
VEAEV
FKEEL
LGDIS
SEPVL
common SCSs =  29
>NP_596869.4 titin isoform N2-A [Homo sapiens]
 >SarsCov2Spike_Specifiedy_by_Mizuno-san
 humanProteinID =  54159 , srsCov2ProteinID =  0
PLVSS
PPAYT
SLLIV
EFRVY
INITR
AGAAA
ALDPL
DPLSE
SNLKP
PKKST
STNLV
TLEIL
LEILD
ILDIT
AENSV
ISVTT
SVTTE
VSMTK
TKTSV
TPPIK
PSKPS
SKPSK
LSSTA
GKLQD
LQDVV
VEAEV
FKEEL
LGDIS
SEPVL
common SCSs =  29
>XP_016860308.1 titin isoform X1 [Homo sapiens]
 >SarsCov2Spike_Specifiedy_by_Mizuno-san
 humanProteinID =  90181 , srsCov2ProteinID =  0
PLVSS
PPAYT
SLLIV
EFRVY
INITR
AGAAA
ALDPL
DPLSE
SNLKP
PKKST
STNLV
TLEIL
LEILD
ILDIT
AENSV
ISVTT
SVTTE
VSMTK
TKTSV
TPPIK
PSKPS
SKPSK
LSSTA
GKLQD
LQDVV
VEAEV
FKEEL
LGDIS
SEPVL
common SCSs =  29
>XP_016860309.1 titin isoform X4 [Homo sapiens]
 >SarsCov2Spike_Specifiedy_by_Mizuno-san
 humanProteinID =  90182 , srsCov2ProteinID =  0
PLVSS
PPAYT
SLLIV
EFRVY
INITR
AGAAA
ALDPL
DPLSE
SNLKP
PKKST
STNLV
TLEIL
LEILD
ILDIT
AENSV
ISVTT
SVTTE
VSMTK
TKTSV
TPPIK
PSKPS
SKPSK
LSSTA
GKLQD
LQDVV
VEAEV
FKEEL
LGDIS
SEPVL
common SCSs =  29
>XP_016860310.1 titin isoform X5 [Homo sapiens]
 >SarsCov2Spike_Specifiedy_by_Mizuno-san
 humanProteinID =  90183 , srsCov2ProteinID =  0
PLVSS
PPAYT
SLLIV
EFRVY
INITR
AGAAA
ALDPL
DPLSE
SNLKP
PKKST
STNLV
TLEIL
LEILD
ILDIT
AENSV
ISVTT
SVTTE
VSMTK
TKTSV
TPPIK
PSKPS
SKPSK
LSSTA
GKLQD
LQDVV
VEAEV
FKEEL
LGDIS
SEPVL
common SCSs =  29
>XP_016860311.1 titin isoform X7 [Homo sapiens]
 >SarsCov2Spike_Specifiedy_by_Mizuno-san
 humanProteinID =  90184 , srsCov2ProteinID =  0
PLVSS
PPAYT
SLLIV
EFRVY
INITR
AGAAA
ALDPL
DPLSE
SNLKP
PKKST
STNLV
TLEIL
LEILD
ILDIT
AENSV
ISVTT
SVTTE
VSMTK
TKTSV
TPPIK
PSKPS
SKPSK
LSSTA
GKLQD
LQDVV
FKEEL
LGDIS
SEPVL
common SCSs =  28
>XP_024308862.1 titin isoform X2 [Homo sapiens]
 >SarsCov2Spike_Specifiedy_by_Mizuno-san
 humanProteinID =  113753 , srsCov2ProteinID =  0
PLVSS
PPAYT
SLLIV
EFRVY
INITR
AGAAA
ALDPL
DPLSE
SNLKP
PKKST
STNLV
TLEIL
LEILD
ILDIT
AENSV
ISVTT
SVTTE
VSMTK
TKTSV
TPPIK
PSKPS
SKPSK
LSSTA
GKLQD
LQDVV
FKEEL
LGDIS
SEPVL
common SCSs =  28
>XP_024308863.1 titin isoform X3 [Homo sapiens]
 >SarsCov2Spike_Specifiedy_by_Mizuno-san
 humanProteinID =  113754 , srsCov2ProteinID =  0
PLVSS
PPAYT
SLLIV
EFRVY
INITR
AGAAA
ALDPL
DPLSE
SNLKP
PKKST
STNLV
TLEIL
LEILD
ILDIT
AENSV
ISVTT
SVTTE
VSMTK
TKTSV
TPPIK
PSKPS
SKPSK
LSSTA
GKLQD
LQDVV
FKEEL
LGDIS
SEPVL
common SCSs =  28
>XP_024308864.1 titin isoform X6 [Homo sapiens]
 >SarsCov2Spike_Specifiedy_by_Mizuno-san
 humanProteinID =  113755 , srsCov2ProteinID =  0
PLVSS
PPAYT
SLLIV
EFRVY
INITR
AGAAA
ALDPL
DPLSE
SNLKP
PKKST
STNLV
TLEIL
LEILD
ILDIT
AENSV
ISVTT
SVTTE
VSMTK
TKTSV
TPPIK
PSKPS
SKPSK
LSSTA
GKLQD
LQDVV
FKEEL
LGDIS
SEPVL
common SCSs =  28
>XP_024308865.1 titin isoform X8 [Homo sapiens]
 >SarsCov2Spike_Specifiedy_by_Mizuno-san
 humanProteinID =  113756 , srsCov2ProteinID =  0
PLVSS
PPAYT
SLLIV
EFRVY
INITR
AGAAA
ALDPL
DPLSE
SNLKP
PKKST
STNLV
TLEIL
LEILD
ILDIT
AENSV
ISVTT
SVTTE
VSMTK
TKTSV
TPPIK
PSKPS
SKPSK
LSSTA
GKLQD
LQDVV
FKEEL
LGDIS
SEPVL
common SCSs =  28
>XP_024308866.1 titin isoform X9 [Homo sapiens]
 >SarsCov2Spike_Specifiedy_by_Mizuno-san
 humanProteinID =  113757 , srsCov2ProteinID =  0
PLVSS
PPAYT
SLLIV
EFRVY
INITR
AGAAA
ALDPL
DPLSE
SNLKP
PKKST
STNLV
TLEIL
LEILD
ILDIT
AENSV
ISVTT
SVTTE
VSMTK
TKTSV
TPPIK
PSKPS
SKPSK
LSSTA
GKLQD
LQDVV
FKEEL
LGDIS
SEPVL
common SCSs =  28
>NP_003310.4 titin isoform N2-B [Homo sapiens]
 >SarsCov2Spike_Specifiedy_by_Mizuno-san
 humanProteinID =  42295 , srsCov2ProteinID =  0
PLVSS
PPAYT
SLLIV
EFRVY
INITR
AGAAA
ALDPL
DPLSE
SNLKP
PKKST
STNLV
TLEIL
LEILD
ISVTT
SVTTE
VSMTK
TKTSV
PSKPS
SKPSK
LSSTA
GKLQD
LQDVV
FKEEL
LGDIS
SEPVL
common SCSs =  25
>NP_597676.3 titin isoform novex-1 [Homo sapiens]
 >SarsCov2Spike_Specifiedy_by_Mizuno-san
 humanProteinID =  54161 , srsCov2ProteinID =  0
PLVSS
PPAYT
SLLIV
EFRVY
INITR
AGAAA
ALDPL
DPLSE
SNLKP
PKKST
STNLV
TLEIL
LEILD
ISVTT
SVTTE
VSMTK
TKTSV
PSKPS
SKPSK
LSSTA
GKLQD
LQDVV
FKEEL
LGDIS
SEPVL
common SCSs =  25
>NP_597681.4 titin isoform novex-2 [Homo sapiens]
 >SarsCov2Spike_Specifiedy_by_Mizuno-san
 humanProteinID =  54164 , srsCov2ProteinID =  0
PLVSS
PPAYT
SLLIV
EFRVY
INITR
AGAAA
ALDPL
DPLSE
SNLKP
PKKST
STNLV
TLEIL
LEILD
ISVTT
SVTTE
VSMTK
TKTSV
PSKPS
SKPSK
LSSTA
GKLQD
LQDVV
FKEEL
LGDIS
SEPVL
common SCSs =  25
>XP_016860312.1 titin isoform X10 [Homo sapiens]
 >SarsCov2Spike_Specifiedy_by_Mizuno-san
 humanProteinID =  90185 , srsCov2ProteinID =  0
PLVSS
PPAYT
SLLIV
EFRVY
INITR
AGAAA
ALDPL
DPLSE
SNLKP
PKKST
STNLV
TLEIL
LEILD
ISVTT
SVTTE
VSMTK
TKTSV
PSKPS
SKPSK
LSSTA
GKLQD
LQDVV
FKEEL
LGDIS
SEPVL
common SCSs =  25
>XP_024308867.1 titin isoform X11 [Homo sapiens]
 >SarsCov2Spike_Specifiedy_by_Mizuno-san
 humanProteinID =  113758 , srsCov2ProteinID =  0
PLVSS
PPAYT
SLLIV
EFRVY
INITR
AGAAA
ALDPL
DPLSE
SNLKP
PKKST
STNLV
TLEIL
LEILD
ISVTT
SVTTE
VSMTK
TKTSV
PSKPS
SKPSK
LSSTA
GKLQD
LQDVV
FKEEL
LGDIS
SEPVL
common SCSs =  25
>XP_024308868.1 titin isoform X12 [Homo sapiens]
 >SarsCov2Spike_Specifiedy_by_Mizuno-san
 humanProteinID =  113759 , srsCov2ProteinID =  0
PLVSS
PPAYT
SLLIV
EFRVY
INITR
ALDPL
DPLSE
SNLKP
PKKST
STNLV
TLEIL
LEILD
ISVTT
SVTTE
VSMTK
TKTSV
PSKPS
SKPSK
LSSTA
GKLQD
FKEEL
LGDIS
SEPVL
common SCSs =  23
>NP_078966.2 mucin-16 [Homo sapiens]
 >SarsCov2Spike_Specifiedy_by_Mizuno-san
 humanProteinID =  51610 , srsCov2ProteinID =  0
RSSVL
VLHST
STEKS
TTLDS
TLDSK
SASFS
ASFST
GVSPT
DISTE
VLTES
SLGAE
AIPTN
NFTIS
PVSMT
GDSTE
NRALT
PDPSK
SALLA
SLSST
LSSTA
SSTAS
common SCSs =  21
>XP_016882975.1 mucin-16 isoform X1 [Homo sapiens]
 >SarsCov2Spike_Specifiedy_by_Mizuno-san
 humanProteinID =  105616 , srsCov2ProteinID =  0
RSSVL
VLHST
STEKS
TTLDS
TLDSK
SASFS
ASFST
GVSPT
DISTE
VLTES
SLGAE
AIPTN
NFTIS
PVSMT
GDSTE
NRALT
PDPSK
SALLA
SLSST
LSSTA
SSTAS
common SCSs =  21
>XP_016882976.1 mucin-16 isoform X2 [Homo sapiens]
 >SarsCov2Spike_Specifiedy_by_Mizuno-san
 humanProteinID =  105617 , srsCov2ProteinID =  0
RSSVL
VLHST
STEKS
TTLDS
TLDSK
SASFS
ASFST
GVSPT
DISTE
VLTES
SLGAE
AIPTN
NFTIS
PVSMT
GDSTE
NRALT
PDPSK
SALLA
SLSST
LSSTA
SSTAS
common SCSs =  21
>XP_016882977.1 mucin-16 isoform X3 [Homo sapiens]
 >SarsCov2Spike_Specifiedy_by_Mizuno-san
 humanProteinID =  105618 , srsCov2ProteinID =  0
RSSVL
VLHST
STEKS
TTLDS
TLDSK
SASFS
ASFST
GVSPT
DISTE
VLTES
SLGAE
AIPTN
NFTIS
PVSMT
GDSTE
NRALT
PDPSK
SALLA
SLSST
LSSTA
SSTAS
common SCSs =  21
>XP_016882978.1 mucin-16 isoform X4 [Homo sapiens]
 >SarsCov2Spike_Specifiedy_by_Mizuno-san
 humanProteinID =  105619 , srsCov2ProteinID =  0
RSSVL
VLHST
STEKS
TTLDS
TLDSK
SASFS
ASFST
GVSPT
DISTE
VLTES
SLGAE
AIPTN
NFTIS
PVSMT
GDSTE
NRALT
PDPSK
SALLA
SLSST
LSSTA
SSTAS
common SCSs =  21
>XP_016882979.1 mucin-16 isoform X5 [Homo sapiens]
 >SarsCov2Spike_Specifiedy_by_Mizuno-san
 humanProteinID =  105620 , srsCov2ProteinID =  0
RSSVL
VLHST
STEKS
TTLDS
TLDSK
SASFS
ASFST
GVSPT
DISTE
VLTES
SLGAE
AIPTN
NFTIS
PVSMT
GDSTE
NRALT
PDPSK
SALLA
SLSST
LSSTA
SSTAS
common SCSs =  21
>XP_016882980.1 mucin-16 isoform X6 [Homo sapiens]
 >SarsCov2Spike_Specifiedy_by_Mizuno-san
 humanProteinID =  105621 , srsCov2ProteinID =  0
RSSVL
VLHST
STEKS
TTLDS
TLDSK
SASFS
ASFST
GVSPT
DISTE
VLTES
SLGAE
AIPTN
NFTIS
PVSMT
GDSTE
NRALT
PDPSK
SALLA
SLSST
LSSTA
SSTAS
common SCSs =  21
>XP_016882981.1 mucin-16 isoform X7 [Homo sapiens]
 >SarsCov2Spike_Specifiedy_by_Mizuno-san
 humanProteinID =  105622 , srsCov2ProteinID =  0
RSSVL
VLHST
STEKS
TTLDS
TLDSK
SASFS
ASFST
GVSPT
DISTE
VLTES
SLGAE
AIPTN
NFTIS
PVSMT
GDSTE
NRALT
PDPSK
SALLA
SLSST
LSSTA
SSTAS
common SCSs =  21
>XP_016882982.1 mucin-16 isoform X8 [Homo sapiens]
 >SarsCov2Spike_Specifiedy_by_Mizuno-san
 humanProteinID =  105623 , srsCov2ProteinID =  0
RSSVL
VLHST
STEKS
TTLDS
TLDSK
SASFS
ASFST
GVSPT
DISTE
VLTES
SLGAE
AIPTN
NFTIS
PVSMT
GDSTE
NRALT
PDPSK
SALLA
SLSST
LSSTA
SSTAS
common SCSs =  21
>XP_016882983.1 mucin-16 isoform X9 [Homo sapiens]
 >SarsCov2Spike_Specifiedy_by_Mizuno-san
 humanProteinID =  105624 , srsCov2ProteinID =  0
RSSVL
VLHST
STEKS
TTLDS
TLDSK
SASFS
ASFST
GVSPT
DISTE
VLTES
SLGAE
AIPTN
NFTIS
PVSMT
GDSTE
NRALT
PDPSK
SALLA
SLSST
LSSTA
SSTAS
common SCSs =  21
>XP_016882984.1 mucin-16 isoform X10 [Homo sapiens]
 >SarsCov2Spike_Specifiedy_by_Mizuno-san
 humanProteinID =  105625 , srsCov2ProteinID =  0
RSSVL
VLHST
STEKS
TTLDS
TLDSK
SASFS
ASFST
GVSPT
DISTE
VLTES
SLGAE
AIPTN
NFTIS
PVSMT
GDSTE
NRALT
PDPSK
SALLA
SLSST
LSSTA
SSTAS
common SCSs =  21
>XP_016882988.1 mucin-16 isoform X11 [Homo sapiens]
 >SarsCov2Spike_Specifiedy_by_Mizuno-san
 humanProteinID =  105626 , srsCov2ProteinID =  0
RSSVL
VLHST
STEKS
SASFS
ASFST
GVSPT
DISTE
VLTES
SLGAE
AIPTN
NFTIS
NRALT
SLSST
LSSTA
SSTAS
common SCSs =  15
>XP_016882989.1 mucin-16 isoform X12 [Homo sapiens]
 >SarsCov2Spike_Specifiedy_by_Mizuno-san
 humanProteinID =  105627 , srsCov2ProteinID =  0
RSSVL
VLHST
STEKS
SASFS
ASFST
GVSPT
DISTE
VLTES
SLGAE
AIPTN
NFTIS
NRALT
SLSST
LSSTA
SSTAS
common SCSs =  15
>NP_115495.3 adhesion G-protein coupled receptor V1 precursor [Homo sapiens]
 >SarsCov2Spike_Specifiedy_by_Mizuno-san
 humanProteinID =  52513 , srsCov2ProteinID =  0
INITR
TAGAA
YSVLY
LPDDF
RDIAD
VAVLY
IGAGI
TNFTI
LGDIA
DDSEP
common SCSs =  10
>XP_016865452.1 adhesion G-protein coupled receptor V1 isoform X1 [Homo sapiens]
 >SarsCov2Spike_Specifiedy_by_Mizuno-san
 humanProteinID =  93669 , srsCov2ProteinID =  0
INITR
TAGAA
YSVLY
LPDDF
RDIAD
VAVLY
IGAGI
TNFTI
LGDIA
DDSEP
common SCSs =  10
>XP_016865453.1 adhesion G-protein coupled receptor V1 isoform X2 [Homo sapiens]
 >SarsCov2Spike_Specifiedy_by_Mizuno-san
 humanProteinID =  93670 , srsCov2ProteinID =  0
INITR
TAGAA
YSVLY
LPDDF
RDIAD
VAVLY
IGAGI
TNFTI
LGDIA
DDSEP
common SCSs =  10
>XP_016865454.1 adhesion G-protein coupled receptor V1 isoform X3 [Homo sapiens]
 >SarsCov2Spike_Specifiedy_by_Mizuno-san
 humanProteinID =  93671 , srsCov2ProteinID =  0
INITR
TAGAA
YSVLY
LPDDF
RDIAD
VAVLY
IGAGI
TNFTI
LGDIA
DDSEP
common SCSs =  10
>XP_016865455.1 adhesion G-protein coupled receptor V1 isoform X4 [Homo sapiens]
 >SarsCov2Spike_Specifiedy_by_Mizuno-san
 humanProteinID =  93672 , srsCov2ProteinID =  0
INITR
TAGAA
YSVLY
LPDDF
RDIAD
VAVLY
IGAGI
TNFTI
LGDIA
DDSEP
common SCSs =  10
>XP_016865456.1 adhesion G-protein coupled receptor V1 isoform X5 [Homo sapiens]
 >SarsCov2Spike_Specifiedy_by_Mizuno-san
 humanProteinID =  93673 , srsCov2ProteinID =  0
INITR
TAGAA
YSVLY
LPDDF
RDIAD
VAVLY
IGAGI
TNFTI
LGDIA
DDSEP
common SCSs =  10
>XP_016865457.1 adhesion G-protein coupled receptor V1 isoform X6 [Homo sapiens]
 >SarsCov2Spike_Specifiedy_by_Mizuno-san
 humanProteinID =  93674 , srsCov2ProteinID =  0
INITR
TAGAA
YSVLY
LPDDF
RDIAD
VAVLY
IGAGI
TNFTI
LGDIA
DDSEP
common SCSs =  10
>XP_016865458.1 adhesion G-protein coupled receptor V1 isoform X7 [Homo sapiens]
 >SarsCov2Spike_Specifiedy_by_Mizuno-san
 humanProteinID =  93675 , srsCov2ProteinID =  0
INITR
TAGAA
YSVLY
LPDDF
RDIAD
VAVLY
IGAGI
TNFTI
LGDIA
DDSEP
common SCSs =  10
>NP_001027.3 ryanodine receptor 3 isoform 1 [Homo sapiens]
 >SarsCov2Spike_Specifiedy_by_Mizuno-san
 humanProteinID =  2926 , srsCov2ProteinID =  0
VLLPL
LLPLV
TLLAL
SNNLD
NLLLQ
GWTFG
FVSGN
NASVV
IDRLN
common SCSs =  9
>NP_001230925.1 ryanodine receptor 3 isoform 2 [Homo sapiens]
 >SarsCov2Spike_Specifiedy_by_Mizuno-san
 humanProteinID =  12425 , srsCov2ProteinID =  0
VLLPL
LLPLV
TLLAL
SNNLD
NLLLQ
GWTFG
FVSGN
NASVV
IDRLN
common SCSs =  9
>XP_011520182.1 ryanodine receptor 3 isoform X9 [Homo sapiens]
 >SarsCov2Spike_Specifiedy_by_Mizuno-san
 humanProteinID =  75232 , srsCov2ProteinID =  0
VLLPL
LLPLV
TLLAL
SNNLD
NLLLQ
GWTFG
FVSGN
NASVV
IDRLN
common SCSs =  9
>XP_016865459.1 adhesion G-protein coupled receptor V1 isoform X8 [Homo sapiens]
 >SarsCov2Spike_Specifiedy_by_Mizuno-san
 humanProteinID =  93676 , srsCov2ProteinID =  0
INITR
YSVLY
LPDDF
RDIAD
VAVLY
IGAGI
TNFTI
LGDIA
DDSEP
common SCSs =  9
>XP_016865460.1 adhesion G-protein coupled receptor V1 isoform X9 [Homo sapiens]
 >SarsCov2Spike_Specifiedy_by_Mizuno-san
 humanProteinID =  93677 , srsCov2ProteinID =  0
INITR
YSVLY
LPDDF
RDIAD
VAVLY
IGAGI
TNFTI
LGDIA
DDSEP
common SCSs =  9
>XP_016866100.1 nesprin-1 isoform X9 [Homo sapiens]
 >SarsCov2Spike_Specifiedy_by_Mizuno-san
 humanProteinID =  94124 , srsCov2ProteinID =  0
RDLPQ
IAWNS
RSVAS
IYKTP
LGKLQ
LQSLQ
DRLNE
NLNES
DLQEL
common SCSs =  9
>XP_016866101.1 nesprin-1 isoform X12 [Homo sapiens]
 >SarsCov2Spike_Specifiedy_by_Mizuno-san
 humanProteinID =  94125 , srsCov2ProteinID =  0
RDLPQ
IAWNS
RSVAS
IYKTP
LGKLQ
LQSLQ
DRLNE
NLNES
DLQEL
common SCSs =  9
>XP_016877957.1 ryanodine receptor 3 isoform X1 [Homo sapiens]
 >SarsCov2Spike_Specifiedy_by_Mizuno-san
 humanProteinID =  102038 , srsCov2ProteinID =  0
VLLPL
LLPLV
TLLAL
SNNLD
NLLLQ
GWTFG
FVSGN
NASVV
IDRLN
common SCSs =  9
>XP_016877958.1 ryanodine receptor 3 isoform X2 [Homo sapiens]
 >SarsCov2Spike_Specifiedy_by_Mizuno-san
 humanProteinID =  102039 , srsCov2ProteinID =  0
VLLPL
LLPLV
TLLAL
SNNLD
NLLLQ
GWTFG
FVSGN
NASVV
IDRLN
common SCSs =  9
>XP_016877959.1 ryanodine receptor 3 isoform X3 [Homo sapiens]
 >SarsCov2Spike_Specifiedy_by_Mizuno-san
 humanProteinID =  102040 , srsCov2ProteinID =  0
VLLPL
LLPLV
TLLAL
SNNLD
NLLLQ
GWTFG
FVSGN
NASVV
IDRLN
common SCSs =  9
>XP_016877960.1 ryanodine receptor 3 isoform X4 [Homo sapiens]
 >SarsCov2Spike_Specifiedy_by_Mizuno-san
 humanProteinID =  102041 , srsCov2ProteinID =  0
VLLPL
LLPLV
TLLAL
SNNLD
NLLLQ
GWTFG
FVSGN
NASVV
IDRLN
common SCSs =  9
>XP_016877961.1 ryanodine receptor 3 isoform X5 [Homo sapiens]
 >SarsCov2Spike_Specifiedy_by_Mizuno-san
 humanProteinID =  102042 , srsCov2ProteinID =  0
VLLPL
LLPLV
TLLAL
SNNLD
NLLLQ
GWTFG
FVSGN
NASVV
IDRLN
common SCSs =  9
>XP_016877962.1 ryanodine receptor 3 isoform X7 [Homo sapiens]
 >SarsCov2Spike_Specifiedy_by_Mizuno-san
 humanProteinID =  102043 , srsCov2ProteinID =  0
VLLPL
LLPLV
TLLAL
SNNLD
NLLLQ
GWTFG
FVSGN
NASVV
IDRLN
common SCSs =  9
>XP_016877963.1 ryanodine receptor 3 isoform X8 [Homo sapiens]
 >SarsCov2Spike_Specifiedy_by_Mizuno-san
 humanProteinID =  102044 , srsCov2ProteinID =  0
VLLPL
LLPLV
TLLAL
SNNLD
NLLLQ
GWTFG
FVSGN
NASVV
IDRLN
common SCSs =  9
>XP_016877964.1 ryanodine receptor 3 isoform X10 [Homo sapiens]
 >SarsCov2Spike_Specifiedy_by_Mizuno-san
 humanProteinID =  102045 , srsCov2ProteinID =  0
VLLPL
LLPLV
TLLAL
SNNLD
NLLLQ
GWTFG
FVSGN
NASVV
IDRLN
common SCSs =  9
>XP_016877965.1 ryanodine receptor 3 isoform X11 [Homo sapiens]
 >SarsCov2Spike_Specifiedy_by_Mizuno-san
 humanProteinID =  102046 , srsCov2ProteinID =  0
VLLPL
LLPLV
TLLAL
SNNLD
NLLLQ
GWTFG
FVSGN
NASVV
IDRLN
common SCSs =  9
>XP_016877966.1 ryanodine receptor 3 isoform X12 [Homo sapiens]
 >SarsCov2Spike_Specifiedy_by_Mizuno-san
 humanProteinID =  102047 , srsCov2ProteinID =  0
VLLPL
LLPLV
TLLAL
SNNLD
NLLLQ
GWTFG
FVSGN
NASVV
IDRLN
common SCSs =  9
>XP_024305783.1 ryanodine receptor 3 isoform X6 [Homo sapiens]
 >SarsCov2Spike_Specifiedy_by_Mizuno-san
 humanProteinID =  111099 , srsCov2ProteinID =  0
VLLPL
LLPLV
TLLAL
SNNLD
NLLLQ
GWTFG
FVSGN
NASVV
IDRLN
common SCSs =  9
>XP_024305784.1 ryanodine receptor 3 isoform X13 [Homo sapiens]
 >SarsCov2Spike_Specifiedy_by_Mizuno-san
 humanProteinID =  111100 , srsCov2ProteinID =  0
VLLPL
LLPLV
TLLAL
SNNLD
NLLLQ
GWTFG
FVSGN
NASVV
IDRLN
common SCSs =  9
>NP_001358915.1 protein unc-80 homolog isoform 3 [Homo sapiens]
 >SarsCov2Spike_Specifiedy_by_Mizuno-san
 humanProteinID =  35082 , srsCov2ProteinID =  0
EPLVD
PLVDL
AGAAA
PDDFT
DDFTG
ECDIP
RRARS
LPDPS
common SCSs =  8
>NP_001371054.1 transmembrane protein KIAA1109 isoform [Homo sapiens]
 >SarsCov2Spike_Specifiedy_by_Mizuno-san
 humanProteinID =  38674 , srsCov2ProteinID =  0
SSSGW
SSGWT
SGWTA
VLYNS
NFTIS
DSLSS
SLSST
VKLHY
common SCSs =  8
>NP_056127.2 transmembrane protein KIAA1109 isoform 2 [Homo sapiens]
 >SarsCov2Spike_Specifiedy_by_Mizuno-san
 humanProteinID =  47612 , srsCov2ProteinID =  0
SSSGW
SSGWT
SGWTA
VLYNS
NFTIS
DSLSS
SLSST
VKLHY
common SCSs =  8
>NP_115893.1 protein unc-80 homolog isoform 1 [Homo sapiens]
 >SarsCov2Spike_Specifiedy_by_Mizuno-san
 humanProteinID =  52797 , srsCov2ProteinID =  0
EPLVD
PLVDL
AGAAA
PDDFT
DDFTG
ECDIP
RRARS
LPDPS
common SCSs =  8
>NP_149062.2 nesprin-1 isoform 2 [Homo sapiens]
 >SarsCov2Spike_Specifiedy_by_Mizuno-san
 humanProteinID =  53170 , srsCov2ProteinID =  0
RDLPQ
IAWNS
RSVAS
LGKLQ
LQSLQ
DRLNE
NLNES
DLQEL
common SCSs =  8
>NP_872393.3 protein unc-80 homolog isoform 2 [Homo sapiens]
 >SarsCov2Spike_Specifiedy_by_Mizuno-san
 humanProteinID =  57646 , srsCov2ProteinID =  0
EPLVD
PLVDL
AGAAA
PDDFT
DDFTG
ECDIP
RRARS
LPDPS
common SCSs =  8
>NP_892006.3 nesprin-1 isoform 1 (nesprin-1 giant or enaptin) [Homo sapiens]
 >SarsCov2Spike_Specifiedy_by_Mizuno-san
 humanProteinID =  57812 , srsCov2ProteinID =  0
RDLPQ
IAWNS
RSVAS
LGKLQ
LQSLQ
DRLNE
NLNES
DLQEL
common SCSs =  8
>XP_005246533.1 protein unc-80 homolog isoform X7 [Homo sapiens]
 >SarsCov2Spike_Specifiedy_by_Mizuno-san
 humanProteinID =  59642 , srsCov2ProteinID =  0
EPLVD
PLVDL
AGAAA
PDDFT
DDFTG
ECDIP
RRARS
LPDPS
common SCSs =  8
>XP_005263339.1 transmembrane protein KIAA1109 isoform X8 [Homo sapiens]
 >SarsCov2Spike_Specifiedy_by_Mizuno-san
 humanProteinID =  62875 , srsCov2ProteinID =  0
SSSGW
SSGWT
SGWTA
VLYNS
NFTIS
DSLSS
SLSST
VKLHY
common SCSs =  8
>XP_005263344.1 transmembrane protein KIAA1109 isoform X9 [Homo sapiens]
 >SarsCov2Spike_Specifiedy_by_Mizuno-san
 humanProteinID =  62876 , srsCov2ProteinID =  0
SSSGW
SSGWT
SGWTA
VLYNS
NFTIS
DSLSS
SLSST
VKLHY
common SCSs =  8
>XP_006714407.1 transmembrane protein KIAA1109 isoform X17 [Homo sapiens]
 >SarsCov2Spike_Specifiedy_by_Mizuno-san
 humanProteinID =  66319 , srsCov2ProteinID =  0
SSSGW
SSGWT
SGWTA
VLYNS
NFTIS
DSLSS
SLSST
VKLHY
common SCSs =  8
>XP_006715470.1 nesprin-1 isoform X1 [Homo sapiens]
 >SarsCov2Spike_Specifiedy_by_Mizuno-san
 humanProteinID =  66592 , srsCov2ProteinID =  0
RDLPQ
IAWNS
RSVAS
LGKLQ
LQSLQ
DRLNE
NLNES
DLQEL
common SCSs =  8
>XP_006715471.1 nesprin-1 isoform X3 [Homo sapiens]
 >SarsCov2Spike_Specifiedy_by_Mizuno-san
 humanProteinID =  66593 , srsCov2ProteinID =  0
RDLPQ
IAWNS
RSVAS
LGKLQ
LQSLQ
DRLNE
NLNES
DLQEL
common SCSs =  8
>XP_006715472.1 nesprin-1 isoform X5 [Homo sapiens]
 >SarsCov2Spike_Specifiedy_by_Mizuno-san
 humanProteinID =  66594 , srsCov2ProteinID =  0
RDLPQ
IAWNS
RSVAS
LGKLQ
LQSLQ
DRLNE
NLNES
DLQEL
common SCSs =  8
>XP_006715473.1 nesprin-1 isoform X6 [Homo sapiens]
 >SarsCov2Spike_Specifiedy_by_Mizuno-san
 humanProteinID =  66595 , srsCov2ProteinID =  0
RDLPQ
IAWNS
RSVAS
LGKLQ
LQSLQ
DRLNE
NLNES
DLQEL
common SCSs =  8
>XP_006715474.1 nesprin-1 isoform X7 [Homo sapiens]
 >SarsCov2Spike_Specifiedy_by_Mizuno-san
 humanProteinID =  66596 , srsCov2ProteinID =  0
RDLPQ
IAWNS
RSVAS
LGKLQ
LQSLQ
DRLNE
NLNES
DLQEL
common SCSs =  8
>XP_006715475.1 nesprin-1 isoform X8 [Homo sapiens]
 >SarsCov2Spike_Specifiedy_by_Mizuno-san
 humanProteinID =  66597 , srsCov2ProteinID =  0
RDLPQ
IAWNS
RSVAS
LGKLQ
LQSLQ
DRLNE
NLNES
DLQEL
common SCSs =  8
>XP_006715476.1 nesprin-1 isoform X10 [Homo sapiens]
 >SarsCov2Spike_Specifiedy_by_Mizuno-san
 humanProteinID =  66598 , srsCov2ProteinID =  0
RDLPQ
IAWNS
RSVAS
LGKLQ
LQSLQ
DRLNE
NLNES
DLQEL
common SCSs =  8
>XP_006715477.1 nesprin-1 isoform X11 [Homo sapiens]
 >SarsCov2Spike_Specifiedy_by_Mizuno-san
 humanProteinID =  66599 , srsCov2ProteinID =  0
RDLPQ
IAWNS
RSVAS
LGKLQ
LQSLQ
DRLNE
NLNES
DLQEL
common SCSs =  8
>XP_006715478.1 nesprin-1 isoform X13 [Homo sapiens]
 >SarsCov2Spike_Specifiedy_by_Mizuno-san
 humanProteinID =  66600 , srsCov2ProteinID =  0
RDLPQ
IAWNS
RSVAS
LGKLQ
LQSLQ
DRLNE
NLNES
DLQEL
common SCSs =  8
>XP_006715479.1 nesprin-1 isoform X15 [Homo sapiens]
 >SarsCov2Spike_Specifiedy_by_Mizuno-san
 humanProteinID =  66601 , srsCov2ProteinID =  0
RDLPQ
IAWNS
RSVAS
LGKLQ
LQSLQ
DRLNE
NLNES
DLQEL
common SCSs =  8
>XP_006715480.1 nesprin-1 isoform X16 [Homo sapiens]
 >SarsCov2Spike_Specifiedy_by_Mizuno-san
 humanProteinID =  66602 , srsCov2ProteinID =  0
RDLPQ
IAWNS
RSVAS
LGKLQ
LQSLQ
DRLNE
NLNES
DLQEL
common SCSs =  8
>XP_006715483.1 nesprin-1 isoform X17 [Homo sapiens]
 >SarsCov2Spike_Specifiedy_by_Mizuno-san
 humanProteinID =  66603 , srsCov2ProteinID =  0
RDLPQ
IAWNS
RSVAS
LGKLQ
LQSLQ
DRLNE
NLNES
DLQEL
common SCSs =  8
>XP_006715484.1 nesprin-1 isoform X19 [Homo sapiens]
 >SarsCov2Spike_Specifiedy_by_Mizuno-san
 humanProteinID =  66604 , srsCov2ProteinID =  0
RDLPQ
IAWNS
RSVAS
LGKLQ
LQSLQ
DRLNE
NLNES
DLQEL
common SCSs =  8
>XP_006715485.1 nesprin-1 isoform X20 [Homo sapiens]
 >SarsCov2Spike_Specifiedy_by_Mizuno-san
 humanProteinID =  66605 , srsCov2ProteinID =  0
RDLPQ
IAWNS
RSVAS
LGKLQ
LQSLQ
DRLNE
NLNES
DLQEL
common SCSs =  8
>XP_006715486.1 nesprin-1 isoform X22 [Homo sapiens]
 >SarsCov2Spike_Specifiedy_by_Mizuno-san
 humanProteinID =  66606 , srsCov2ProteinID =  0
RDLPQ
IAWNS
RSVAS
LGKLQ
LQSLQ
DRLNE
NLNES
DLQEL
common SCSs =  8
>XP_006715487.1 nesprin-1 isoform X24 [Homo sapiens]
 >SarsCov2Spike_Specifiedy_by_Mizuno-san
 humanProteinID =  66607 , srsCov2ProteinID =  0
RDLPQ
IAWNS
RSVAS
LGKLQ
LQSLQ
DRLNE
NLNES
DLQEL
common SCSs =  8
>XP_006715488.1 nesprin-1 isoform X26 [Homo sapiens]
 >SarsCov2Spike_Specifiedy_by_Mizuno-san
 humanProteinID =  66608 , srsCov2ProteinID =  0
RDLPQ
IAWNS
RSVAS
LGKLQ
LQSLQ
DRLNE
NLNES
DLQEL
common SCSs =  8
>XP_011509306.1 protein unc-80 homolog isoform X1 [Homo sapiens]
 >SarsCov2Spike_Specifiedy_by_Mizuno-san
 humanProteinID =  70132 , srsCov2ProteinID =  0
EPLVD
PLVDL
AGAAA
PDDFT
DDFTG
ECDIP
RRARS
LPDPS
common SCSs =  8
>XP_011509307.1 protein unc-80 homolog isoform X2 [Homo sapiens]
 >SarsCov2Spike_Specifiedy_by_Mizuno-san
 humanProteinID =  70133 , srsCov2ProteinID =  0
EPLVD
PLVDL
AGAAA
PDDFT
DDFTG
ECDIP
RRARS
LPDPS
common SCSs =  8
>XP_011509308.1 protein unc-80 homolog isoform X3 [Homo sapiens]
 >SarsCov2Spike_Specifiedy_by_Mizuno-san
 humanProteinID =  70134 , srsCov2ProteinID =  0
EPLVD
PLVDL
AGAAA
PDDFT
DDFTG
ECDIP
RRARS
LPDPS
common SCSs =  8
>XP_011509309.1 protein unc-80 homolog isoform X5 [Homo sapiens]
 >SarsCov2Spike_Specifiedy_by_Mizuno-san
 humanProteinID =  70135 , srsCov2ProteinID =  0
EPLVD
PLVDL
AGAAA
PDDFT
DDFTG
ECDIP
RRARS
LPDPS
common SCSs =  8
>XP_011509310.1 protein unc-80 homolog isoform X8 [Homo sapiens]
 >SarsCov2Spike_Specifiedy_by_Mizuno-san
 humanProteinID =  70136 , srsCov2ProteinID =  0
EPLVD
PLVDL
AGAAA
PDDFT
DDFTG
ECDIP
RRARS
LPDPS
common SCSs =  8
>XP_011530622.1 transmembrane protein KIAA1109 isoform X1 [Homo sapiens]
 >SarsCov2Spike_Specifiedy_by_Mizuno-san
 humanProteinID =  80350 , srsCov2ProteinID =  0
SSSGW
SSGWT
SGWTA
VLYNS
NFTIS
DSLSS
SLSST
VKLHY
common SCSs =  8
>XP_011530623.1 transmembrane protein KIAA1109 isoform X1 [Homo sapiens]
 >SarsCov2Spike_Specifiedy_by_Mizuno-san
 humanProteinID =  80351 , srsCov2ProteinID =  0
SSSGW
SSGWT
SGWTA
VLYNS
NFTIS
DSLSS
SLSST
VKLHY
common SCSs =  8
>XP_011530624.1 transmembrane protein KIAA1109 isoform X2 [Homo sapiens]
 >SarsCov2Spike_Specifiedy_by_Mizuno-san
 humanProteinID =  80352 , srsCov2ProteinID =  0
SSSGW
SSGWT
SGWTA
VLYNS
NFTIS
DSLSS
SLSST
VKLHY
common SCSs =  8
>XP_011530625.1 transmembrane protein KIAA1109 isoform X3 [Homo sapiens]
 >SarsCov2Spike_Specifiedy_by_Mizuno-san
 humanProteinID =  80353 , srsCov2ProteinID =  0
SSSGW
SSGWT
SGWTA
VLYNS
NFTIS
DSLSS
SLSST
VKLHY
common SCSs =  8
>XP_011530626.1 transmembrane protein KIAA1109 isoform X4 [Homo sapiens]
 >SarsCov2Spike_Specifiedy_by_Mizuno-san
 humanProteinID =  80354 , srsCov2ProteinID =  0
SSSGW
SSGWT
SGWTA
VLYNS
NFTIS
DSLSS
SLSST
VKLHY
common SCSs =  8
>XP_011530627.1 transmembrane protein KIAA1109 isoform X5 [Homo sapiens]
 >SarsCov2Spike_Specifiedy_by_Mizuno-san
 humanProteinID =  80355 , srsCov2ProteinID =  0
SSSGW
SSGWT
SGWTA
VLYNS
NFTIS
DSLSS
SLSST
VKLHY
common SCSs =  8
>XP_011530628.1 transmembrane protein KIAA1109 isoform X6 [Homo sapiens]
 >SarsCov2Spike_Specifiedy_by_Mizuno-san
 humanProteinID =  80356 , srsCov2ProteinID =  0
SSSGW
SSGWT
SGWTA
VLYNS
NFTIS
DSLSS
SLSST
VKLHY
common SCSs =  8
>XP_011530629.1 transmembrane protein KIAA1109 isoform X7 [Homo sapiens]
 >SarsCov2Spike_Specifiedy_by_Mizuno-san
 humanProteinID =  80357 , srsCov2ProteinID =  0
SSSGW
SSGWT
SGWTA
VLYNS
NFTIS
DSLSS
SLSST
VKLHY
common SCSs =  8
>XP_011530632.1 transmembrane protein KIAA1109 isoform X13 [Homo sapiens]
 >SarsCov2Spike_Specifiedy_by_Mizuno-san
 humanProteinID =  80358 , srsCov2ProteinID =  0
SSSGW
SSGWT
SGWTA
VLYNS
NFTIS
DSLSS
SLSST
VKLHY
common SCSs =  8
>XP_011533943.1 nesprin-1 isoform X2 [Homo sapiens]
 >SarsCov2Spike_Specifiedy_by_Mizuno-san
 humanProteinID =  81872 , srsCov2ProteinID =  0
RDLPQ
IAWNS
RSVAS
LGKLQ
LQSLQ
DRLNE
NLNES
DLQEL
common SCSs =  8
>XP_011533944.1 nesprin-1 isoform X4 [Homo sapiens]
 >SarsCov2Spike_Specifiedy_by_Mizuno-san
 humanProteinID =  81873 , srsCov2ProteinID =  0
RDLPQ
IAWNS
RSVAS
LGKLQ
LQSLQ
DRLNE
NLNES
DLQEL
common SCSs =  8
>XP_011533945.1 nesprin-1 isoform X21 [Homo sapiens]
 >SarsCov2Spike_Specifiedy_by_Mizuno-san
 humanProteinID =  81874 , srsCov2ProteinID =  0
RDLPQ
IAWNS
RSVAS
LGKLQ
LQSLQ
DRLNE
NLNES
DLQEL
common SCSs =  8
>XP_011533946.1 nesprin-1 isoform X29 [Homo sapiens]
 >SarsCov2Spike_Specifiedy_by_Mizuno-san
 humanProteinID =  81875 , srsCov2ProteinID =  0
RDLPQ
IAWNS
RSVAS
LGKLQ
LQSLQ
DRLNE
NLNES
DLQEL
common SCSs =  8
>XP_011533947.1 nesprin-1 isoform X30 [Homo sapiens]
 >SarsCov2Spike_Specifiedy_by_Mizuno-san
 humanProteinID =  81876 , srsCov2ProteinID =  0
RDLPQ
IAWNS
RSVAS
LGKLQ
LQSLQ
DRLNE
NLNES
DLQEL
common SCSs =  8
>XP_016859373.1 protein unc-80 homolog isoform X4 [Homo sapiens]
 >SarsCov2Spike_Specifiedy_by_Mizuno-san
 humanProteinID =  89547 , srsCov2ProteinID =  0
EPLVD
PLVDL
AGAAA
PDDFT
DDFTG
ECDIP
RRARS
LPDPS
common SCSs =  8
>XP_016859375.1 protein unc-80 homolog isoform X9 [Homo sapiens]
 >SarsCov2Spike_Specifiedy_by_Mizuno-san
 humanProteinID =  89548 , srsCov2ProteinID =  0
EPLVD
PLVDL
AGAAA
PDDFT
DDFTG
ECDIP
RRARS
LPDPS
common SCSs =  8
>XP_016859376.1 protein unc-80 homolog isoform X10 [Homo sapiens]
 >SarsCov2Spike_Specifiedy_by_Mizuno-san
 humanProteinID =  89549 , srsCov2ProteinID =  0
EPLVD
PLVDL
AGAAA
PDDFT
DDFTG
ECDIP
RRARS
LPDPS
common SCSs =  8
>XP_016859377.1 protein unc-80 homolog isoform X11 [Homo sapiens]
 >SarsCov2Spike_Specifiedy_by_Mizuno-san
 humanProteinID =  89550 , srsCov2ProteinID =  0
EPLVD
PLVDL
AGAAA
PDDFT
DDFTG
ECDIP
RRARS
LPDPS
common SCSs =  8
>XP_016859378.1 protein unc-80 homolog isoform X12 [Homo sapiens]
 >SarsCov2Spike_Specifiedy_by_Mizuno-san
 humanProteinID =  89551 , srsCov2ProteinID =  0
EPLVD
PLVDL
AGAAA
PDDFT
DDFTG
ECDIP
RRARS
LPDPS
common SCSs =  8
>XP_016859379.1 protein unc-80 homolog isoform X13 [Homo sapiens]
 >SarsCov2Spike_Specifiedy_by_Mizuno-san
 humanProteinID =  89552 , srsCov2ProteinID =  0
EPLVD
PLVDL
AGAAA
PDDFT
DDFTG
ECDIP
RRARS
LPDPS
common SCSs =  8
>XP_016859380.1 protein unc-80 homolog isoform X14 [Homo sapiens]
 >SarsCov2Spike_Specifiedy_by_Mizuno-san
 humanProteinID =  89553 , srsCov2ProteinID =  0
EPLVD
PLVDL
AGAAA
PDDFT
DDFTG
ECDIP
RRARS
LPDPS
common SCSs =  8
>XP_016864184.1 transmembrane protein KIAA1109 isoform X10 [Homo sapiens]
 >SarsCov2Spike_Specifiedy_by_Mizuno-san
 humanProteinID =  92765 , srsCov2ProteinID =  0
SSSGW
SSGWT
SGWTA
VLYNS
NFTIS
DSLSS
SLSST
VKLHY
common SCSs =  8
>XP_016864185.1 transmembrane protein KIAA1109 isoform X11 [Homo sapiens]
 >SarsCov2Spike_Specifiedy_by_Mizuno-san
 humanProteinID =  92766 , srsCov2ProteinID =  0
SSSGW
SSGWT
SGWTA
VLYNS
NFTIS
DSLSS
SLSST
VKLHY
common SCSs =  8
>XP_016864186.1 transmembrane protein KIAA1109 isoform X12 [Homo sapiens]
 >SarsCov2Spike_Specifiedy_by_Mizuno-san
 humanProteinID =  92767 , srsCov2ProteinID =  0
SSSGW
SSGWT
SGWTA
VLYNS
NFTIS
DSLSS
SLSST
VKLHY
common SCSs =  8
>XP_016866097.1 nesprin-1 isoform X1 [Homo sapiens]
 >SarsCov2Spike_Specifiedy_by_Mizuno-san
 humanProteinID =  94121 , srsCov2ProteinID =  0
RDLPQ
IAWNS
RSVAS
LGKLQ
LQSLQ
DRLNE
NLNES
DLQEL
common SCSs =  8
>XP_016866098.1 nesprin-1 isoform X1 [Homo sapiens]
 >SarsCov2Spike_Specifiedy_by_Mizuno-san
 humanProteinID =  94122 , srsCov2ProteinID =  0
RDLPQ
IAWNS
RSVAS
LGKLQ
LQSLQ
DRLNE
NLNES
DLQEL
common SCSs =  8
>XP_016866099.1 nesprin-1 isoform X5 [Homo sapiens]
 >SarsCov2Spike_Specifiedy_by_Mizuno-san
 humanProteinID =  94123 , srsCov2ProteinID =  0
RDLPQ
IAWNS
RSVAS
LGKLQ
LQSLQ
DRLNE
NLNES
DLQEL
common SCSs =  8
>XP_016866102.1 nesprin-1 isoform X14 [Homo sapiens]
 >SarsCov2Spike_Specifiedy_by_Mizuno-san
 humanProteinID =  94126 , srsCov2ProteinID =  0
RDLPQ
IAWNS
RSVAS
LGKLQ
LQSLQ
DRLNE
NLNES
DLQEL
common SCSs =  8
>XP_016866103.1 nesprin-1 isoform X18 [Homo sapiens]
 >SarsCov2Spike_Specifiedy_by_Mizuno-san
 humanProteinID =  94127 , srsCov2ProteinID =  0
RDLPQ
IAWNS
RSVAS
LGKLQ
LQSLQ
DRLNE
NLNES
DLQEL
common SCSs =  8
>XP_016866104.1 nesprin-1 isoform X23 [Homo sapiens]
 >SarsCov2Spike_Specifiedy_by_Mizuno-san
 humanProteinID =  94128 , srsCov2ProteinID =  0
RDLPQ
IAWNS
RSVAS
LGKLQ
LQSLQ
DRLNE
NLNES
DLQEL
common SCSs =  8
>XP_016866105.1 nesprin-1 isoform X25 [Homo sapiens]
 >SarsCov2Spike_Specifiedy_by_Mizuno-san
 humanProteinID =  94129 , srsCov2ProteinID =  0
RDLPQ
IAWNS
RSVAS
LGKLQ
LQSLQ
DRLNE
NLNES
DLQEL
common SCSs =  8
>XP_016866106.1 nesprin-1 isoform X27 [Homo sapiens]
 >SarsCov2Spike_Specifiedy_by_Mizuno-san
 humanProteinID =  94130 , srsCov2ProteinID =  0
RDLPQ
IAWNS
RSVAS
LGKLQ
LQSLQ
DRLNE
NLNES
DLQEL
common SCSs =  8
>XP_016866107.1 nesprin-1 isoform X28 [Homo sapiens]
 >SarsCov2Spike_Specifiedy_by_Mizuno-san
 humanProteinID =  94131 , srsCov2ProteinID =  0
RDLPQ
IAWNS
RSVAS
LGKLQ
LQSLQ
DRLNE
NLNES
DLQEL
common SCSs =  8
>XP_016866108.1 nesprin-1 isoform X29 [Homo sapiens]
 >SarsCov2Spike_Specifiedy_by_Mizuno-san
 humanProteinID =  94132 , srsCov2ProteinID =  0
RDLPQ
IAWNS
RSVAS
LGKLQ
LQSLQ
DRLNE
NLNES
DLQEL
common SCSs =  8
>XP_024310011.1 transmembrane protein KIAA1109 isoform X14 [Homo sapiens]
 >SarsCov2Spike_Specifiedy_by_Mizuno-san
 humanProteinID =  114802 , srsCov2ProteinID =  0
SSSGW
SSGWT
SGWTA
VLYNS
NFTIS
DSLSS
SLSST
VKLHY
common SCSs =  8
>NP_001077422.1 thyroid adenoma-associated protein isoform a [Homo sapiens]
 >SarsCov2Spike_Specifiedy_by_Mizuno-san
 humanProteinID =  4310 , srsCov2ProteinID =  0
RFQTL
TLKSF
SVDCT
ISSVL
NASVV
ASVVN
SVVNI
common SCSs =  7
>NP_001185879.1 unconventional myosin-XVI isoform 1 [Homo sapiens]
 >SarsCov2Spike_Specifiedy_by_Mizuno-san
 humanProteinID =  10725 , srsCov2ProteinID =  0
LNDLC
TNLVK
HADQL
DEDDS
EDDSE
DDSEP
DSEPV
common SCSs =  7
>NP_001332852.1 thyroid adenoma-associated protein isoform d [Homo sapiens]
 >SarsCov2Spike_Specifiedy_by_Mizuno-san
 humanProteinID =  25238 , srsCov2ProteinID =  0
RFQTL
TLKSF
SVDCT
ISSVL
NASVV
ASVVN
SVVNI
common SCSs =  7
>NP_001332854.1 thyroid adenoma-associated protein isoform a [Homo sapiens]
 >SarsCov2Spike_Specifiedy_by_Mizuno-san
 humanProteinID =  25240 , srsCov2ProteinID =  0
RFQTL
TLKSF
SVDCT
ISSVL
NASVV
ASVVN
SVVNI
common SCSs =  7
>NP_001367.2 cytoplasmic dynein 1 heavy chain 1 [Homo sapiens]
 >SarsCov2Spike_Specifiedy_by_Mizuno-san
 humanProteinID =  38102 , srsCov2ProteinID =  0
WFHAI
VRDLP
AGSTP
LFNKV
NVLYE
VLYEN
LDKVE
common SCSs =  7
>NP_002214.2 inositol 1,4,5-trisphosphate receptor type 2 [Homo sapiens]
 >SarsCov2Spike_Specifiedy_by_Mizuno-san
 humanProteinID =  41279 , srsCov2ProteinID =  0
ENGTI
NGTIT
KLQDV
LQDVV
LVKQL
VKQLS
EVAKN
common SCSs =  7
>NP_055826.1 unconventional myosin-XVI isoform 2 [Homo sapiens]
 >SarsCov2Spike_Specifiedy_by_Mizuno-san
 humanProteinID =  47363 , srsCov2ProteinID =  0
LNDLC
TNLVK
HADQL
DEDDS
EDDSE
DDSEP
DSEPV
common SCSs =  7
>NP_071348.3 thyroid adenoma-associated protein isoform a [Homo sapiens]
 >SarsCov2Spike_Specifiedy_by_Mizuno-san
 humanProteinID =  50846 , srsCov2ProteinID =  0
RFQTL
TLKSF
SVDCT
ISSVL
NASVV
ASVVN
SVVNI
common SCSs =  7
>NP_733751.2 histone-lysine N-methyltransferase 2C [Homo sapiens]
 >SarsCov2Spike_Specifiedy_by_Mizuno-san
 humanProteinID =  56170 , srsCov2ProteinID =  0
NLCPF
DEVRQ
EVRQI
VRQIA
IIAYT
IQDSL
QDSLS
common SCSs =  7
>NP_775871.2 mucin-19 precursor [Homo sapiens]
 >SarsCov2Spike_Specifiedy_by_Mizuno-san
 humanProteinID =  56578 , srsCov2ProteinID =  0
ESEFR
GLTGT
PCSFG
CSFGG
TKTSV
TITSG
ITSGW
common SCSs =  7
>XP_005250082.1 histone-lysine N-methyltransferase 2C isoform X1 [Homo sapiens]
 >SarsCov2Spike_Specifiedy_by_Mizuno-san
 humanProteinID =  60432 , srsCov2ProteinID =  0
NLCPF
DEVRQ
EVRQI
VRQIA
IIAYT
IQDSL
QDSLS
common SCSs =  7
>XP_005250083.1 histone-lysine N-methyltransferase 2C isoform X2 [Homo sapiens]
 >SarsCov2Spike_Specifiedy_by_Mizuno-san
 humanProteinID =  60433 , srsCov2ProteinID =  0
NLCPF
DEVRQ
EVRQI
VRQIA
IIAYT
IQDSL
QDSLS
common SCSs =  7
>XP_005250084.1 histone-lysine N-methyltransferase 2C isoform X3 [Homo sapiens]
 >SarsCov2Spike_Specifiedy_by_Mizuno-san
 humanProteinID =  60434 , srsCov2ProteinID =  0
NLCPF
DEVRQ
EVRQI
VRQIA
IIAYT
IQDSL
QDSLS
common SCSs =  7
>XP_005250085.1 histone-lysine N-methyltransferase 2C isoform X6 [Homo sapiens]
 >SarsCov2Spike_Specifiedy_by_Mizuno-san
 humanProteinID =  60435 , srsCov2ProteinID =  0
NLCPF
DEVRQ
EVRQI
VRQIA
IIAYT
IQDSL
QDSLS
common SCSs =  7
>XP_005250088.1 histone-lysine N-methyltransferase 2C isoform X18 [Homo sapiens]
 >SarsCov2Spike_Specifiedy_by_Mizuno-san
 humanProteinID =  60436 , srsCov2ProteinID =  0
NLCPF
DEVRQ
EVRQI
VRQIA
IIAYT
IQDSL
QDSLS
common SCSs =  7
>XP_006712127.1 thyroid adenoma-associated protein isoform X2 [Homo sapiens]
 >SarsCov2Spike_Specifiedy_by_Mizuno-san
 humanProteinID =  65684 , srsCov2ProteinID =  0
RFQTL
TLKSF
SVDCT
ISSVL
NASVV
ASVVN
SVVNI
common SCSs =  7
>XP_006712128.1 thyroid adenoma-associated protein isoform X3 [Homo sapiens]
 >SarsCov2Spike_Specifiedy_by_Mizuno-san
 humanProteinID =  65685 , srsCov2ProteinID =  0
RFQTL
TLKSF
SVDCT
ISSVL
NASVV
ASVVN
SVVNI
common SCSs =  7
>XP_006712131.1 thyroid adenoma-associated protein isoform X6 [Homo sapiens]
 >SarsCov2Spike_Specifiedy_by_Mizuno-san
 humanProteinID =  65688 , srsCov2ProteinID =  0
RFQTL
TLKSF
SVDCT
ISSVL
NASVV
ASVVN
SVVNI
common SCSs =  7
>XP_006716140.1 histone-lysine N-methyltransferase 2C isoform X4 [Homo sapiens]
 >SarsCov2Spike_Specifiedy_by_Mizuno-san
 humanProteinID =  66797 , srsCov2ProteinID =  0
NLCPF
DEVRQ
EVRQI
VRQIA
IIAYT
IQDSL
QDSLS
common SCSs =  7
>XP_006716141.1 histone-lysine N-methyltransferase 2C isoform X12 [Homo sapiens]
 >SarsCov2Spike_Specifiedy_by_Mizuno-san
 humanProteinID =  66798 , srsCov2ProteinID =  0
NLCPF
DEVRQ
EVRQI
VRQIA
IIAYT
IQDSL
QDSLS
common SCSs =  7
>XP_006716142.1 histone-lysine N-methyltransferase 2C isoform X19 [Homo sapiens]
 >SarsCov2Spike_Specifiedy_by_Mizuno-san
 humanProteinID =  66799 , srsCov2ProteinID =  0
NLCPF
DEVRQ
EVRQI
VRQIA
IIAYT
IQDSL
QDSLS
common SCSs =  7
>XP_011514752.1 histone-lysine N-methyltransferase 2C isoform X10 [Homo sapiens]
 >SarsCov2Spike_Specifiedy_by_Mizuno-san
 humanProteinID =  72726 , srsCov2ProteinID =  0
NLCPF
DEVRQ
EVRQI
VRQIA
IIAYT
IQDSL
QDSLS
common SCSs =  7
>XP_011514753.1 histone-lysine N-methyltransferase 2C isoform X15 [Homo sapiens]
 >SarsCov2Spike_Specifiedy_by_Mizuno-san
 humanProteinID =  72727 , srsCov2ProteinID =  0
NLCPF
DEVRQ
EVRQI
VRQIA
IIAYT
IQDSL
QDSLS
common SCSs =  7
>XP_011514754.1 histone-lysine N-methyltransferase 2C isoform X17 [Homo sapiens]
 >SarsCov2Spike_Specifiedy_by_Mizuno-san
 humanProteinID =  72728 , srsCov2ProteinID =  0
NLCPF
DEVRQ
EVRQI
VRQIA
IIAYT
IQDSL
QDSLS
common SCSs =  7
>XP_011514755.1 histone-lysine N-methyltransferase 2C isoform X21 [Homo sapiens]
 >SarsCov2Spike_Specifiedy_by_Mizuno-san
 humanProteinID =  72729 , srsCov2ProteinID =  0
NLCPF
DEVRQ
EVRQI
VRQIA
IIAYT
IQDSL
QDSLS
common SCSs =  7
>XP_011514756.1 histone-lysine N-methyltransferase 2C isoform X22 [Homo sapiens]
 >SarsCov2Spike_Specifiedy_by_Mizuno-san
 humanProteinID =  72730 , srsCov2ProteinID =  0
NLCPF
DEVRQ
EVRQI
VRQIA
IIAYT
IQDSL
QDSLS
common SCSs =  7
>XP_011514758.1 histone-lysine N-methyltransferase 2C isoform X25 [Homo sapiens]
 >SarsCov2Spike_Specifiedy_by_Mizuno-san
 humanProteinID =  72731 , srsCov2ProteinID =  0
NLCPF
DEVRQ
EVRQI
VRQIA
IIAYT
IQDSL
QDSLS
common SCSs =  7
>XP_011519364.1 unconventional myosin-XVI isoform X1 [Homo sapiens]
 >SarsCov2Spike_Specifiedy_by_Mizuno-san
 humanProteinID =  74827 , srsCov2ProteinID =  0
LNDLC
TNLVK
HADQL
DEDDS
EDDSE
DDSEP
DSEPV
common SCSs =  7
>XP_011531317.1 thyroid adenoma-associated protein isoform X7 [Homo sapiens]
 >SarsCov2Spike_Specifiedy_by_Mizuno-san
 humanProteinID =  80690 , srsCov2ProteinID =  0
RFQTL
TLKSF
SVDCT
ISSVL
NASVV
ASVVN
SVVNI
common SCSs =  7
>XP_016859381.1 protein unc-80 homolog isoform X16 [Homo sapiens]
 >SarsCov2Spike_Specifiedy_by_Mizuno-san
 humanProteinID =  89554 , srsCov2ProteinID =  0
EPLVD
PLVDL
AGAAA
PDDFT
DDFTG
ECDIP
RRARS
common SCSs =  7
>XP_016865461.1 adhesion G-protein coupled receptor V1 isoform X10 [Homo sapiens]
 >SarsCov2Spike_Specifiedy_by_Mizuno-san
 humanProteinID =  93678 , srsCov2ProteinID =  0
INITR
TAGAA
LPDDF
RDIAD
VAVLY
LGDIA
DDSEP
common SCSs =  7
>XP_016865462.1 adhesion G-protein coupled receptor V1 isoform X11 [Homo sapiens]
 >SarsCov2Spike_Specifiedy_by_Mizuno-san
 humanProteinID =  93679 , srsCov2ProteinID =  0
INITR
TAGAA
LPDDF
RDIAD
VAVLY
LGDIA
DDSEP
common SCSs =  7
>XP_016867969.1 histone-lysine N-methyltransferase 2C isoform X1 [Homo sapiens]
 >SarsCov2Spike_Specifiedy_by_Mizuno-san
 humanProteinID =  95440 , srsCov2ProteinID =  0
NLCPF
DEVRQ
EVRQI
VRQIA
IIAYT
IQDSL
QDSLS
common SCSs =  7
>XP_016867970.1 histone-lysine N-methyltransferase 2C isoform X2 [Homo sapiens]
 >SarsCov2Spike_Specifiedy_by_Mizuno-san
 humanProteinID =  95441 , srsCov2ProteinID =  0
NLCPF
DEVRQ
EVRQI
VRQIA
IIAYT
IQDSL
QDSLS
common SCSs =  7
>XP_016867971.1 histone-lysine N-methyltransferase 2C isoform X7 [Homo sapiens]
 >SarsCov2Spike_Specifiedy_by_Mizuno-san
 humanProteinID =  95442 , srsCov2ProteinID =  0
NLCPF
DEVRQ
EVRQI
VRQIA
IIAYT
IQDSL
QDSLS
common SCSs =  7
>XP_016867972.1 histone-lysine N-methyltransferase 2C isoform X8 [Homo sapiens]
 >SarsCov2Spike_Specifiedy_by_Mizuno-san
 humanProteinID =  95443 , srsCov2ProteinID =  0
NLCPF
DEVRQ
EVRQI
VRQIA
IIAYT
IQDSL
QDSLS
common SCSs =  7
>XP_016867973.1 histone-lysine N-methyltransferase 2C isoform X9 [Homo sapiens]
 >SarsCov2Spike_Specifiedy_by_Mizuno-san
 humanProteinID =  95444 , srsCov2ProteinID =  0
NLCPF
DEVRQ
EVRQI
VRQIA
IIAYT
IQDSL
QDSLS
common SCSs =  7
>XP_016867974.1 histone-lysine N-methyltransferase 2C isoform X11 [Homo sapiens]
 >SarsCov2Spike_Specifiedy_by_Mizuno-san
 humanProteinID =  95445 , srsCov2ProteinID =  0
NLCPF
DEVRQ
EVRQI
VRQIA
IIAYT
IQDSL
QDSLS
common SCSs =  7
>XP_016867975.1 histone-lysine N-methyltransferase 2C isoform X14 [Homo sapiens]
 >SarsCov2Spike_Specifiedy_by_Mizuno-san
 humanProteinID =  95446 , srsCov2ProteinID =  0
NLCPF
DEVRQ
EVRQI
VRQIA
IIAYT
IQDSL
QDSLS
common SCSs =  7
>XP_016867976.1 histone-lysine N-methyltransferase 2C isoform X16 [Homo sapiens]
 >SarsCov2Spike_Specifiedy_by_Mizuno-san
 humanProteinID =  95447 , srsCov2ProteinID =  0
NLCPF
DEVRQ
EVRQI
VRQIA
IIAYT
IQDSL
QDSLS
common SCSs =  7
>XP_016867977.1 histone-lysine N-methyltransferase 2C isoform X20 [Homo sapiens]
 >SarsCov2Spike_Specifiedy_by_Mizuno-san
 humanProteinID =  95448 , srsCov2ProteinID =  0
NLCPF
DEVRQ
EVRQI
VRQIA
IIAYT
IQDSL
QDSLS
common SCSs =  7
>XP_016874755.1 inositol 1,4,5-trisphosphate receptor type 2 isoform X1 [Homo sapiens]
 >SarsCov2Spike_Specifiedy_by_Mizuno-san
 humanProteinID =  99805 , srsCov2ProteinID =  0
ENGTI
NGTIT
KLQDV
LQDVV
LVKQL
VKQLS
EVAKN
common SCSs =  7
>XP_016874756.1 inositol 1,4,5-trisphosphate receptor type 2 isoform X2 [Homo sapiens]
 >SarsCov2Spike_Specifiedy_by_Mizuno-san
 humanProteinID =  99806 , srsCov2ProteinID =  0
ENGTI
NGTIT
KLQDV
LQDVV
LVKQL
VKQLS
EVAKN
common SCSs =  7
>XP_024302620.1 histone-lysine N-methyltransferase 2C isoform X5 [Homo sapiens]
 >SarsCov2Spike_Specifiedy_by_Mizuno-san
 humanProteinID =  108318 , srsCov2ProteinID =  0
NLCPF
DEVRQ
EVRQI
VRQIA
IIAYT
IQDSL
QDSLS
common SCSs =  7
>XP_024302621.1 histone-lysine N-methyltransferase 2C isoform X13 [Homo sapiens]
 >SarsCov2Spike_Specifiedy_by_Mizuno-san
 humanProteinID =  108319 , srsCov2ProteinID =  0
NLCPF
DEVRQ
EVRQI
VRQIA
IIAYT
IQDSL
QDSLS
common SCSs =  7
>NP_000531.2 ryanodine receptor 1 isoform 1 [Homo sapiens]
 >SarsCov2Spike_Specifiedy_by_Mizuno-san
 humanProteinID =  504 , srsCov2ProteinID =  0
TQDLF
SLLIV
TLLAL
AGAAA
GAGAA
IDRLN
common SCSs =  6
>NP_001026.2 ryanodine receptor 2 [Homo sapiens]
 >SarsCov2Spike_Specifiedy_by_Mizuno-san
 humanProteinID =  2859 , srsCov2ProteinID =  0
VYSSA
VDLPI
TLLAL
LLLQY
QQLIR
YFKNH
common SCSs =  6
>NP_001036188.1 ryanodine receptor 1 isoform 2 [Homo sapiens]
 >SarsCov2Spike_Specifiedy_by_Mizuno-san
 humanProteinID =  3693 , srsCov2ProteinID =  0
TQDLF
SLLIV
TLLAL
AGAAA
GAGAA
IDRLN
common SCSs =  6
>NP_001180394.1 KAT8 regulatory NSL complex subunit 1 isoform 2 [Homo sapiens]
 >SarsCov2Spike_Specifiedy_by_Mizuno-san
 humanProteinID =  10211 , srsCov2ProteinID =  0
DLFLP
NGTKR
PGDSS
DSSSG
YSNNS
LGKLQ
common SCSs =  6
>NP_001180395.1 KAT8 regulatory NSL complex subunit 1 isoform 1 [Homo sapiens]
 >SarsCov2Spike_Specifiedy_by_Mizuno-san
 humanProteinID =  10212 , srsCov2ProteinID =  0
DLFLP
NGTKR
PGDSS
DSSSG
YSNNS
LGKLQ
common SCSs =  6
>NP_001278214.1 protocadherin Fat 4 isoform 2 precursor [Homo sapiens]
 >SarsCov2Spike_Specifiedy_by_Mizuno-san
 humanProteinID =  17879 , srsCov2ProteinID =  0
GTNGT
LVRDL
DSSSG
RTFLL
LTGTG
TSALL
common SCSs =  6
>NP_001278232.1 protocadherin Fat 4 isoform 1 precursor [Homo sapiens]
 >SarsCov2Spike_Specifiedy_by_Mizuno-san
 humanProteinID =  17882 , srsCov2ProteinID =  0
GTNGT
LVRDL
DSSSG
RTFLL
LTGTG
TSALL
common SCSs =  6
>NP_001278789.1 basement membrane-specific heparan sulfate proteoglycan core protein isoform a precursor [Homo sapiens]
 >SarsCov2Spike_Specifiedy_by_Mizuno-san
 humanProteinID =  18047 , srsCov2ProteinID =  0
VSSQC
SKVGG
AGSTP
VVVLS
LADAG
ADAGF
common SCSs =  6
>NP_001333694.1 unconventional myosin-XVIIIa isoform c [Homo sapiens]
 >SarsCov2Spike_Specifiedy_by_Mizuno-san
 humanProteinID =  25637 , srsCov2ProteinID =  0
SSVLH
NATRF
FSQIL
LIRAA
IRAAE
RAAEI
common SCSs =  6
>NP_001333695.1 unconventional myosin-XVIIIa isoform d [Homo sapiens]
 >SarsCov2Spike_Specifiedy_by_Mizuno-san
 humanProteinID =  25638 , srsCov2ProteinID =  0
SSVLH
NATRF
FSQIL
LIRAA
IRAAE
RAAEI
common SCSs =  6
>NP_001333696.1 unconventional myosin-XVIIIa isoform e [Homo sapiens]
 >SarsCov2Spike_Specifiedy_by_Mizuno-san
 humanProteinID =  25639 , srsCov2ProteinID =  0
SSVLH
NATRF
FSQIL
LIRAA
IRAAE
RAAEI
common SCSs =  6
>NP_001366127.1 KAT8 regulatory NSL complex subunit 1 isoform 1 [Homo sapiens]
 >SarsCov2Spike_Specifiedy_by_Mizuno-san
 humanProteinID =  37948 , srsCov2ProteinID =  0
DLFLP
NGTKR
PGDSS
DSSSG
YSNNS
LGKLQ
common SCSs =  6
>NP_002102.4 huntingtin [Homo sapiens]
 >SarsCov2Spike_Specifiedy_by_Mizuno-san
 humanProteinID =  41173 , srsCov2ProteinID =  0
FLVLL
KLNDL
QDSLS
SLSST
LSRLD
EDDSE
common SCSs =  6
>NP_004645.2 probable ubiquitin carboxyl-terminal hydrolase FAF-Y [Homo sapiens]
 >SarsCov2Spike_Specifiedy_by_Mizuno-san
 humanProteinID =  43526 , srsCov2ProteinID =  0
IVRFP
VRFPN
ENSVA
SSTAS
SECVL
EQYIK
common SCSs =  6
>NP_005520.4 basement membrane-specific heparan sulfate proteoglycan core protein isoform b precursor [Homo sapiens]
 >SarsCov2Spike_Specifiedy_by_Mizuno-san
 humanProteinID =  44329 , srsCov2ProteinID =  0
VSSQC
SKVGG
AGSTP
VVVLS
LADAG
ADAGF
common SCSs =  6
>NP_006653.2 helicase SRCAP [Homo sapiens]
 >SarsCov2Spike_Specifiedy_by_Mizuno-san
 humanProteinID =  45363 , srsCov2ProteinID =  0
EILPV
ILPVS
LTVLP
LPPLL
NFTTA
VTQRN
common SCSs =  6
>NP_008816.3 zinc finger homeobox protein 3 isoform A [Homo sapiens]
 >SarsCov2Spike_Specifiedy_by_Mizuno-san
 humanProteinID =  45563 , srsCov2ProteinID =  0
TAGAA
AGAAA
GYLQP
LTGTG
STASA
SLQTY
common SCSs =  6
>NP_055995.4 nesprin-2 isoform 1 [Homo sapiens]
 >SarsCov2Spike_Specifiedy_by_Mizuno-san
 humanProteinID =  47507 , srsCov2ProteinID =  0
RSSVL
RLDKV
LQSLQ
RAAEI
VLGQS
DSFKE
common SCSs =  6
>NP_056258.1 KAT8 regulatory NSL complex subunit 1 isoform 1 [Homo sapiens]
 >SarsCov2Spike_Specifiedy_by_Mizuno-san
 humanProteinID =  47720 , srsCov2ProteinID =  0
DLFLP
NGTKR
PGDSS
DSSSG
YSNNS
LGKLQ
common SCSs =  6
>NP_060639.4 retroelement silencing factor 1 [Homo sapiens]
 >SarsCov2Spike_Specifiedy_by_Mizuno-san
 humanProteinID =  49198 , srsCov2ProteinID =  0
TEKSN
GINIT
TSNQV
SKRSF
GVTQN
VTQNV
common SCSs =  6
>NP_078858.4 protocadherin Fat 4 isoform 3 precursor [Homo sapiens]
 >SarsCov2Spike_Specifiedy_by_Mizuno-san
 humanProteinID =  51515 , srsCov2ProteinID =  0
GTNGT
LVRDL
DSSSG
RTFLL
LTGTG
TSALL
common SCSs =  6
>NP_113584.3 E3 ubiquitin-protein ligase HUWE1 [Homo sapiens]
 >SarsCov2Spike_Specifiedy_by_Mizuno-san
 humanProteinID =  52279 , srsCov2ProteinID =  0
LLPLV
LADAG
STASA
TASAL
EAEVQ
DEDDS
common SCSs =  6
>NP_510880.2 unconventional myosin-XVIIIa isoform a [Homo sapiens]
 >SarsCov2Spike_Specifiedy_by_Mizuno-san
 humanProteinID =  53773 , srsCov2ProteinID =  0
SSVLH
NATRF
FSQIL
LIRAA
IRAAE
RAAEI
common SCSs =  6
>NP_775922.3 fibrous sheath-interacting protein 2 [Homo sapiens]
 >SarsCov2Spike_Specifiedy_by_Mizuno-san
 humanProteinID =  56609 , srsCov2ProteinID =  0
LDSKT
NITNL
LEILD
LGQSK
FPREG
NESLI
common SCSs =  6
>NP_849172.2 NLR family CARD domain-containing protein 3 [Homo sapiens]
 >SarsCov2Spike_Specifiedy_by_Mizuno-san
 humanProteinID =  57261 , srsCov2ProteinID =  0
NIIRG
AAAYY
SKVGG
TLEIL
LEILD
ALLAG
common SCSs =  6
>NP_878918.2 nesprin-2 isoform 5 [Homo sapiens]
 >SarsCov2Spike_Specifiedy_by_Mizuno-san
 humanProteinID =  57790 , srsCov2ProteinID =  0
RSSVL
RLDKV
LQSLQ
RAAEI
VLGQS
DSFKE
common SCSs =  6
>NP_976063.1 unconventional myosin-XVIIIa isoform b [Homo sapiens]
 >SarsCov2Spike_Specifiedy_by_Mizuno-san
 humanProteinID =  58760 , srsCov2ProteinID =  0
SSVLH
NATRF
FSQIL
LIRAA
IRAAE
RAAEI
common SCSs =  6
>XP_005253462.1 retroelement silencing factor 1 isoform X1 [Homo sapiens]
 >SarsCov2Spike_Specifiedy_by_Mizuno-san
 humanProteinID =  61055 , srsCov2ProteinID =  0
TEKSN
GINIT
TSNQV
SKRSF
GVTQN
VTQNV
common SCSs =  6
>XP_005256014.1 zinc finger homeobox protein 3 isoform X1 [Homo sapiens]
 >SarsCov2Spike_Specifiedy_by_Mizuno-san
 humanProteinID =  61493 , srsCov2ProteinID =  0
TAGAA
AGAAA
GYLQP
LTGTG
STASA
SLQTY
common SCSs =  6
>XP_005262022.1 E3 ubiquitin-protein ligase HUWE1 isoform X11 [Homo sapiens]
 >SarsCov2Spike_Specifiedy_by_Mizuno-san
 humanProteinID =  62618 , srsCov2ProteinID =  0
LLPLV
LADAG
STASA
TASAL
EAEVQ
DEDDS
common SCSs =  6
>XP_005267511.1 nesprin-2 isoform X3 [Homo sapiens]
 >SarsCov2Spike_Specifiedy_by_Mizuno-san
 humanProteinID =  63743 , srsCov2ProteinID =  0
RSSVL
RLDKV
LQSLQ
RAAEI
VLGQS
DSFKE
common SCSs =  6
>XP_005267513.1 nesprin-2 isoform X5 [Homo sapiens]
 >SarsCov2Spike_Specifiedy_by_Mizuno-san
 humanProteinID =  63744 , srsCov2ProteinID =  0
RSSVL
RLDKV
LQSLQ
RAAEI
VLGQS
DSFKE
common SCSs =  6
>XP_005267514.1 nesprin-2 isoform X9 [Homo sapiens]
 >SarsCov2Spike_Specifiedy_by_Mizuno-san
 humanProteinID =  63745 , srsCov2ProteinID =  0
RSSVL
RLDKV
LQSLQ
RAAEI
VLGQS
DSFKE
common SCSs =  6
>XP_005267515.1 nesprin-2 isoform X10 [Homo sapiens]
 >SarsCov2Spike_Specifiedy_by_Mizuno-san
 humanProteinID =  63746 , srsCov2ProteinID =  0
RSSVL
RLDKV
LQSLQ
RAAEI
VLGQS
DSFKE
common SCSs =  6
>XP_005267516.1 nesprin-2 isoform X12 [Homo sapiens]
 >SarsCov2Spike_Specifiedy_by_Mizuno-san
 humanProteinID =  63747 , srsCov2ProteinID =  0
RSSVL
RLDKV
LQSLQ
RAAEI
VLGQS
DSFKE
common SCSs =  6
>XP_006711865.1 ryanodine receptor 2 isoform X1 [Homo sapiens]
 >SarsCov2Spike_Specifiedy_by_Mizuno-san
 humanProteinID =  65596 , srsCov2ProteinID =  0
VYSSA
VDLPI
TLLAL
LLLQY
QQLIR
YFKNH
common SCSs =  6
>XP_006711866.1 ryanodine receptor 2 isoform X2 [Homo sapiens]
 >SarsCov2Spike_Specifiedy_by_Mizuno-san
 humanProteinID =  65597 , srsCov2ProteinID =  0
VYSSA
VDLPI
TLLAL
LLLQY
QQLIR
YFKNH
common SCSs =  6
>XP_006711867.1 ryanodine receptor 2 isoform X4 [Homo sapiens]
 >SarsCov2Spike_Specifiedy_by_Mizuno-san
 humanProteinID =  65598 , srsCov2ProteinID =  0
VYSSA
VDLPI
TLLAL
LLLQY
QQLIR
YFKNH
common SCSs =  6
>XP_006711868.1 ryanodine receptor 2 isoform X5 [Homo sapiens]
 >SarsCov2Spike_Specifiedy_by_Mizuno-san
 humanProteinID =  65599 , srsCov2ProteinID =  0
VYSSA
VDLPI
TLLAL
LLLQY
QQLIR
YFKNH
common SCSs =  6
>XP_006711869.1 ryanodine receptor 2 isoform X6 [Homo sapiens]
 >SarsCov2Spike_Specifiedy_by_Mizuno-san
 humanProteinID =  65600 , srsCov2ProteinID =  0
VYSSA
VDLPI
TLLAL
LLLQY
QQLIR
YFKNH
common SCSs =  6
>XP_006711870.1 ryanodine receptor 2 isoform X7 [Homo sapiens]
 >SarsCov2Spike_Specifiedy_by_Mizuno-san
 humanProteinID =  65601 , srsCov2ProteinID =  0
VYSSA
VDLPI
TLLAL
LLLQY
QQLIR
YFKNH
common SCSs =  6
>XP_006711873.1 ryanodine receptor 2 isoform X9 [Homo sapiens]
 >SarsCov2Spike_Specifiedy_by_Mizuno-san
 humanProteinID =  65603 , srsCov2ProteinID =  0
VYSSA
VDLPI
TLLAL
LLLQY
QQLIR
YFKNH
common SCSs =  6
>XP_006712129.1 thyroid adenoma-associated protein isoform X4 [Homo sapiens]
 >SarsCov2Spike_Specifiedy_by_Mizuno-san
 humanProteinID =  65686 , srsCov2ProteinID =  0
TLKSF
SVDCT
ISSVL
NASVV
ASVVN
SVVNI
common SCSs =  6
>XP_006712130.1 thyroid adenoma-associated protein isoform X5 [Homo sapiens]
 >SarsCov2Spike_Specifiedy_by_Mizuno-san
 humanProteinID =  65687 , srsCov2ProteinID =  0
TLKSF
SVDCT
ISSVL
NASVV
ASVVN
SVVNI
common SCSs =  6
>XP_006721887.1 KAT8 regulatory NSL complex subunit 1 isoform X1 [Homo sapiens]
 >SarsCov2Spike_Specifiedy_by_Mizuno-san
 humanProteinID =  68299 , srsCov2ProteinID =  0
DLFLP
NGTKR
PGDSS
DSSSG
YSNNS
LGKLQ
common SCSs =  6
>XP_006723380.1 ryanodine receptor 1 isoform X1 [Homo sapiens]
 >SarsCov2Spike_Specifiedy_by_Mizuno-san
 humanProteinID =  68694 , srsCov2ProteinID =  0
TQDLF
SLLIV
TLLAL
AGAAA
GAGAA
IDRLN
common SCSs =  6
>XP_006723382.1 ryanodine receptor 1 isoform X2 [Homo sapiens]
 >SarsCov2Spike_Specifiedy_by_Mizuno-san
 humanProteinID =  68695 , srsCov2ProteinID =  0
TQDLF
SLLIV
TLLAL
AGAAA
GAGAA
IDRLN
common SCSs =  6
>XP_011509312.1 protein unc-80 homolog isoform X15 [Homo sapiens]
 >SarsCov2Spike_Specifiedy_by_Mizuno-san
 humanProteinID =  70137 , srsCov2ProteinID =  0
EPLVD
PLVDL
AGAAA
ECDIP
RRARS
LPDPS
common SCSs =  6
>XP_011519024.1 retroelement silencing factor 1 isoform X1 [Homo sapiens]
 >SarsCov2Spike_Specifiedy_by_Mizuno-san
 humanProteinID =  74683 , srsCov2ProteinID =  0
TEKSN
GINIT
TSNQV
SKRSF
GVTQN
VTQNV
common SCSs =  6
>XP_011522930.1 KAT8 regulatory NSL complex subunit 1 isoform X2 [Homo sapiens]
 >SarsCov2Spike_Specifiedy_by_Mizuno-san
 humanProteinID =  76569 , srsCov2ProteinID =  0
DLFLP
NGTKR
PGDSS
DSSSG
YSNNS
LGKLQ
common SCSs =  6
>XP_011522932.1 KAT8 regulatory NSL complex subunit 1 isoform X4 [Homo sapiens]
 >SarsCov2Spike_Specifiedy_by_Mizuno-san
 humanProteinID =  76571 , srsCov2ProteinID =  0
DLFLP
NGTKR
PGDSS
DSSSG
YSNNS
LGKLQ
common SCSs =  6
>XP_011522933.1 KAT8 regulatory NSL complex subunit 1 isoform X5 [Homo sapiens]
 >SarsCov2Spike_Specifiedy_by_Mizuno-san
 humanProteinID =  76572 , srsCov2ProteinID =  0
DLFLP
NGTKR
PGDSS
DSSSG
YSNNS
LGKLQ
common SCSs =  6
>XP_011525507.1 ryanodine receptor 1 isoform X3 [Homo sapiens]
 >SarsCov2Spike_Specifiedy_by_Mizuno-san
 humanProteinID =  77804 , srsCov2ProteinID =  0
TQDLF
SLLIV
TLLAL
AGAAA
GAGAA
IDRLN
common SCSs =  6
>XP_011529049.1 E3 ubiquitin-protein ligase HUWE1 isoform X9 [Homo sapiens]
 >SarsCov2Spike_Specifiedy_by_Mizuno-san
 humanProteinID =  79567 , srsCov2ProteinID =  0
LLPLV
LADAG
STASA
TASAL
EAEVQ
DEDDS
common SCSs =  6
>XP_011529053.1 E3 ubiquitin-protein ligase HUWE1 isoform X9 [Homo sapiens]
 >SarsCov2Spike_Specifiedy_by_Mizuno-san
 humanProteinID =  79568 , srsCov2ProteinID =  0
LLPLV
LADAG
STASA
TASAL
EAEVQ
DEDDS
common SCSs =  6
>XP_011534876.1 nesprin-2 isoform X1 [Homo sapiens]
 >SarsCov2Spike_Specifiedy_by_Mizuno-san
 humanProteinID =  82338 , srsCov2ProteinID =  0
RSSVL
RLDKV
LQSLQ
RAAEI
VLGQS
DSFKE
common SCSs =  6
>XP_011534877.1 nesprin-2 isoform X1 [Homo sapiens]
 >SarsCov2Spike_Specifiedy_by_Mizuno-san
 humanProteinID =  82339 , srsCov2ProteinID =  0
RSSVL
RLDKV
LQSLQ
RAAEI
VLGQS
DSFKE
common SCSs =  6
>XP_011534878.1 nesprin-2 isoform X1 [Homo sapiens]
 >SarsCov2Spike_Specifiedy_by_Mizuno-san
 humanProteinID =  82340 , srsCov2ProteinID =  0
RSSVL
RLDKV
LQSLQ
RAAEI
VLGQS
DSFKE
common SCSs =  6
>XP_011534879.1 nesprin-2 isoform X1 [Homo sapiens]
 >SarsCov2Spike_Specifiedy_by_Mizuno-san
 humanProteinID =  82341 , srsCov2ProteinID =  0
RSSVL
RLDKV
LQSLQ
RAAEI
VLGQS
DSFKE
common SCSs =  6
>XP_011534880.1 nesprin-2 isoform X2 [Homo sapiens]
 >SarsCov2Spike_Specifiedy_by_Mizuno-san
 humanProteinID =  82342 , srsCov2ProteinID =  0
RSSVL
RLDKV
LQSLQ
RAAEI
VLGQS
DSFKE
common SCSs =  6
>XP_011534881.1 nesprin-2 isoform X4 [Homo sapiens]
 >SarsCov2Spike_Specifiedy_by_Mizuno-san
 humanProteinID =  82343 , srsCov2ProteinID =  0
RSSVL
RLDKV
LQSLQ
RAAEI
VLGQS
DSFKE
common SCSs =  6
>XP_011534882.1 nesprin-2 isoform X6 [Homo sapiens]
 >SarsCov2Spike_Specifiedy_by_Mizuno-san
 humanProteinID =  82344 , srsCov2ProteinID =  0
RSSVL
RLDKV
LQSLQ
RAAEI
VLGQS
DSFKE
common SCSs =  6
>XP_011534883.1 nesprin-2 isoform X8 [Homo sapiens]
 >SarsCov2Spike_Specifiedy_by_Mizuno-san
 humanProteinID =  82345 , srsCov2ProteinID =  0
RSSVL
RLDKV
LQSLQ
RAAEI
VLGQS
DSFKE
common SCSs =  6
>XP_011534884.1 nesprin-2 isoform X11 [Homo sapiens]
 >SarsCov2Spike_Specifiedy_by_Mizuno-san
 humanProteinID =  82346 , srsCov2ProteinID =  0
RSSVL
RLDKV
LQSLQ
RAAEI
VLGQS
DSFKE
common SCSs =  6
>XP_011539410.2 E3 ubiquitin-protein ligase UBR4 isoform X1 [Homo sapiens]
 >SarsCov2Spike_Specifiedy_by_Mizuno-san
 humanProteinID =  84439 , srsCov2ProteinID =  0
GGVSV
ALLAG
TASAL
DILSR
LQELG
DDSEP
common SCSs =  6
>XP_011539411.2 E3 ubiquitin-protein ligase UBR4 isoform X2 [Homo sapiens]
 >SarsCov2Spike_Specifiedy_by_Mizuno-san
 humanProteinID =  84440 , srsCov2ProteinID =  0
GGVSV
ALLAG
TASAL
DILSR
LQELG
DDSEP
common SCSs =  6
>XP_011539412.2 E3 ubiquitin-protein ligase UBR4 isoform X3 [Homo sapiens]
 >SarsCov2Spike_Specifiedy_by_Mizuno-san
 humanProteinID =  84441 , srsCov2ProteinID =  0
GGVSV
ALLAG
TASAL
DILSR
LQELG
DDSEP
common SCSs =  6
>XP_011539413.2 E3 ubiquitin-protein ligase UBR4 isoform X4 [Homo sapiens]
 >SarsCov2Spike_Specifiedy_by_Mizuno-san
 humanProteinID =  84442 , srsCov2ProteinID =  0
GGVSV
ALLAG
TASAL
DILSR
LQELG
DDSEP
common SCSs =  6
>XP_011539414.2 E3 ubiquitin-protein ligase UBR4 isoform X5 [Homo sapiens]
 >SarsCov2Spike_Specifiedy_by_Mizuno-san
 humanProteinID =  84443 , srsCov2ProteinID =  0
GGVSV
ALLAG
TASAL
DILSR
LQELG
DDSEP
common SCSs =  6
>XP_011539415.2 E3 ubiquitin-protein ligase UBR4 isoform X6 [Homo sapiens]
 >SarsCov2Spike_Specifiedy_by_Mizuno-san
 humanProteinID =  84444 , srsCov2ProteinID =  0
GGVSV
ALLAG
TASAL
DILSR
LQELG
DDSEP
common SCSs =  6
>XP_011539418.2 E3 ubiquitin-protein ligase UBR4 isoform X10 [Homo sapiens]
 >SarsCov2Spike_Specifiedy_by_Mizuno-san
 humanProteinID =  84447 , srsCov2ProteinID =  0
GGVSV
ALLAG
TASAL
DILSR
LQELG
DDSEP
common SCSs =  6
>XP_011539419.2 E3 ubiquitin-protein ligase UBR4 isoform X12 [Homo sapiens]
 >SarsCov2Spike_Specifiedy_by_Mizuno-san
 humanProteinID =  84448 , srsCov2ProteinID =  0
GGVSV
ALLAG
TASAL
DILSR
LQELG
DDSEP
common SCSs =  6
>XP_011539420.2 E3 ubiquitin-protein ligase UBR4 isoform X13 [Homo sapiens]
 >SarsCov2Spike_Specifiedy_by_Mizuno-san
 humanProteinID =  84449 , srsCov2ProteinID =  0
GGVSV
ALLAG
TASAL
DILSR
LQELG
DDSEP
common SCSs =  6
>XP_011539421.2 E3 ubiquitin-protein ligase UBR4 isoform X17 [Homo sapiens]
 >SarsCov2Spike_Specifiedy_by_Mizuno-san
 humanProteinID =  84450 , srsCov2ProteinID =  0
GGVSV
ALLAG
TASAL
DILSR
LQELG
DDSEP
common SCSs =  6
>XP_011539620.1 basement membrane-specific heparan sulfate proteoglycan core protein isoform X1 [Homo sapiens]
 >SarsCov2Spike_Specifiedy_by_Mizuno-san
 humanProteinID =  84543 , srsCov2ProteinID =  0
VSSQC
SKVGG
AGSTP
VVVLS
LADAG
ADAGF
common SCSs =  6
>XP_016856312.2 E3 ubiquitin-protein ligase UBR4 isoform X11 [Homo sapiens]
 >SarsCov2Spike_Specifiedy_by_Mizuno-san
 humanProteinID =  87436 , srsCov2ProteinID =  0
GGVSV
ALLAG
TASAL
DILSR
LQELG
DDSEP
common SCSs =  6
>XP_016856314.2 E3 ubiquitin-protein ligase UBR4 isoform X15 [Homo sapiens]
 >SarsCov2Spike_Specifiedy_by_Mizuno-san
 humanProteinID =  87438 , srsCov2ProteinID =  0
GGVSV
ALLAG
TASAL
DILSR
LQELG
DDSEP
common SCSs =  6
>XP_016856609.1 basement membrane-specific heparan sulfate proteoglycan core protein isoform X2 [Homo sapiens]
 >SarsCov2Spike_Specifiedy_by_Mizuno-san
 humanProteinID =  87663 , srsCov2ProteinID =  0
VSSQC
SKVGG
AGSTP
VVVLS
LADAG
ADAGF
common SCSs =  6
>XP_016856610.1 basement membrane-specific heparan sulfate proteoglycan core protein isoform X3 [Homo sapiens]
 >SarsCov2Spike_Specifiedy_by_Mizuno-san
 humanProteinID =  87664 , srsCov2ProteinID =  0
VSSQC
SKVGG
AGSTP
VVVLS
LADAG
ADAGF
common SCSs =  6
>XP_016856611.1 basement membrane-specific heparan sulfate proteoglycan core protein isoform X4 [Homo sapiens]
 >SarsCov2Spike_Specifiedy_by_Mizuno-san
 humanProteinID =  87665 , srsCov2ProteinID =  0
VSSQC
SKVGG
AGSTP
VVVLS
LADAG
ADAGF
common SCSs =  6
>XP_016857517.1 ryanodine receptor 2 isoform X3 [Homo sapiens]
 >SarsCov2Spike_Specifiedy_by_Mizuno-san
 humanProteinID =  88308 , srsCov2ProteinID =  0
VYSSA
VDLPI
TLLAL
LLLQY
QQLIR
YFKNH
common SCSs =  6
>XP_016859382.1 protein unc-80 homolog isoform X17 [Homo sapiens]
 >SarsCov2Spike_Specifiedy_by_Mizuno-san
 humanProteinID =  89555 , srsCov2ProteinID =  0
EPLVD
PLVDL
AGAAA
ECDIP
RRARS
LPDPS
common SCSs =  6
>XP_016859383.1 protein unc-80 homolog isoform X18 [Homo sapiens]
 >SarsCov2Spike_Specifiedy_by_Mizuno-san
 humanProteinID =  89556 , srsCov2ProteinID =  0
EPLVD
PLVDL
AGAAA
PDDFT
DDFTG
ECDIP
common SCSs =  6
>XP_016865463.1 adhesion G-protein coupled receptor V1 isoform X12 [Homo sapiens]
 >SarsCov2Spike_Specifiedy_by_Mizuno-san
 humanProteinID =  93680 , srsCov2ProteinID =  0
YSVLY
LPDDF
VAVLY
IGAGI
TNFTI
DDSEP
common SCSs =  6
>XP_016867978.1 histone-lysine N-methyltransferase 2C isoform X23 [Homo sapiens]
 >SarsCov2Spike_Specifiedy_by_Mizuno-san
 humanProteinID =  95449 , srsCov2ProteinID =  0
DEVRQ
EVRQI
VRQIA
IIAYT
IQDSL
QDSLS
common SCSs =  6
>XP_016867979.1 histone-lysine N-methyltransferase 2C isoform X24 [Homo sapiens]
 >SarsCov2Spike_Specifiedy_by_Mizuno-san
 humanProteinID =  95450 , srsCov2ProteinID =  0
DEVRQ
EVRQI
VRQIA
IIAYT
IQDSL
QDSLS
common SCSs =  6
>XP_016875039.1 retroelement silencing factor 1 isoform X1 [Homo sapiens]
 >SarsCov2Spike_Specifiedy_by_Mizuno-san
 humanProteinID =  100003 , srsCov2ProteinID =  0
TEKSN
GINIT
TSNQV
SKRSF
GVTQN
VTQNV
common SCSs =  6
>XP_016876590.1 nesprin-2 isoform X1 [Homo sapiens]
 >SarsCov2Spike_Specifiedy_by_Mizuno-san
 humanProteinID =  101085 , srsCov2ProteinID =  0
RSSVL
RLDKV
LQSLQ
RAAEI
VLGQS
DSFKE
common SCSs =  6
>XP_016876591.1 nesprin-2 isoform X7 [Homo sapiens]
 >SarsCov2Spike_Specifiedy_by_Mizuno-san
 humanProteinID =  101086 , srsCov2ProteinID =  0
RSSVL
RLDKV
LQSLQ
RAAEI
VLGQS
DSFKE
common SCSs =  6
>XP_016878516.1 NLR family CARD domain-containing protein 3 isoform X1 [Homo sapiens]
 >SarsCov2Spike_Specifiedy_by_Mizuno-san
 humanProteinID =  102412 , srsCov2ProteinID =  0
NIIRG
AAAYY
SKVGG
TLEIL
LEILD
ALLAG
common SCSs =  6
>XP_016878517.1 NLR family CARD domain-containing protein 3 isoform X1 [Homo sapiens]
 >SarsCov2Spike_Specifiedy_by_Mizuno-san
 humanProteinID =  102413 , srsCov2ProteinID =  0
NIIRG
AAAYY
SKVGG
TLEIL
LEILD
ALLAG
common SCSs =  6
>XP_016878518.1 NLR family CARD domain-containing protein 3 isoform X1 [Homo sapiens]
 >SarsCov2Spike_Specifiedy_by_Mizuno-san
 humanProteinID =  102414 , srsCov2ProteinID =  0
NIIRG
AAAYY
SKVGG
TLEIL
LEILD
ALLAG
common SCSs =  6
>XP_016878519.1 NLR family CARD domain-containing protein 3 isoform X1 [Homo sapiens]
 >SarsCov2Spike_Specifiedy_by_Mizuno-san
 humanProteinID =  102415 , srsCov2ProteinID =  0
NIIRG
AAAYY
SKVGG
TLEIL
LEILD
ALLAG
common SCSs =  6
>XP_016878520.1 NLR family CARD domain-containing protein 3 isoform X1 [Homo sapiens]
 >SarsCov2Spike_Specifiedy_by_Mizuno-san
 humanProteinID =  102416 , srsCov2ProteinID =  0
NIIRG
AAAYY
SKVGG
TLEIL
LEILD
ALLAG
common SCSs =  6
>XP_016878522.1 NLR family CARD domain-containing protein 3 isoform X1 [Homo sapiens]
 >SarsCov2Spike_Specifiedy_by_Mizuno-san
 humanProteinID =  102417 , srsCov2ProteinID =  0
NIIRG
AAAYY
SKVGG
TLEIL
LEILD
ALLAG
common SCSs =  6
>XP_016878523.1 NLR family CARD domain-containing protein 3 isoform X1 [Homo sapiens]
 >SarsCov2Spike_Specifiedy_by_Mizuno-san
 humanProteinID =  102418 , srsCov2ProteinID =  0
NIIRG
AAAYY
SKVGG
TLEIL
LEILD
ALLAG
common SCSs =  6
>XP_016878524.1 NLR family CARD domain-containing protein 3 isoform X1 [Homo sapiens]
 >SarsCov2Spike_Specifiedy_by_Mizuno-san
 humanProteinID =  102419 , srsCov2ProteinID =  0
NIIRG
AAAYY
SKVGG
TLEIL
LEILD
ALLAG
common SCSs =  6
>XP_016878525.1 NLR family CARD domain-containing protein 3 isoform X1 [Homo sapiens]
 >SarsCov2Spike_Specifiedy_by_Mizuno-san
 humanProteinID =  102420 , srsCov2ProteinID =  0
NIIRG
AAAYY
SKVGG
TLEIL
LEILD
ALLAG
common SCSs =  6
>XP_016879977.1 KAT8 regulatory NSL complex subunit 1 isoform X5 [Homo sapiens]
 >SarsCov2Spike_Specifiedy_by_Mizuno-san
 humanProteinID =  103488 , srsCov2ProteinID =  0
DLFLP
NGTKR
PGDSS
DSSSG
YSNNS
LGKLQ
common SCSs =  6
>XP_016884680.1 E3 ubiquitin-protein ligase HUWE1 isoform X1 [Homo sapiens]
 >SarsCov2Spike_Specifiedy_by_Mizuno-san
 humanProteinID =  106809 , srsCov2ProteinID =  0
LLPLV
LADAG
STASA
TASAL
EAEVQ
DEDDS
common SCSs =  6
>XP_016884681.1 E3 ubiquitin-protein ligase HUWE1 isoform X2 [Homo sapiens]
 >SarsCov2Spike_Specifiedy_by_Mizuno-san
 humanProteinID =  106810 , srsCov2ProteinID =  0
LLPLV
LADAG
STASA
TASAL
EAEVQ
DEDDS
common SCSs =  6
>XP_016884682.1 E3 ubiquitin-protein ligase HUWE1 isoform X3 [Homo sapiens]
 >SarsCov2Spike_Specifiedy_by_Mizuno-san
 humanProteinID =  106811 , srsCov2ProteinID =  0
LLPLV
LADAG
STASA
TASAL
EAEVQ
DEDDS
common SCSs =  6
>XP_016884683.1 E3 ubiquitin-protein ligase HUWE1 isoform X4 [Homo sapiens]
 >SarsCov2Spike_Specifiedy_by_Mizuno-san
 humanProteinID =  106812 , srsCov2ProteinID =  0
LLPLV
LADAG
STASA
TASAL
EAEVQ
DEDDS
common SCSs =  6
>XP_016884684.1 E3 ubiquitin-protein ligase HUWE1 isoform X5 [Homo sapiens]
 >SarsCov2Spike_Specifiedy_by_Mizuno-san
 humanProteinID =  106813 , srsCov2ProteinID =  0
LLPLV
LADAG
STASA
TASAL
EAEVQ
DEDDS
common SCSs =  6
>XP_016884685.1 E3 ubiquitin-protein ligase HUWE1 isoform X6 [Homo sapiens]
 >SarsCov2Spike_Specifiedy_by_Mizuno-san
 humanProteinID =  106814 , srsCov2ProteinID =  0
LLPLV
LADAG
STASA
TASAL
EAEVQ
DEDDS
common SCSs =  6
>XP_016884686.1 E3 ubiquitin-protein ligase HUWE1 isoform X7 [Homo sapiens]
 >SarsCov2Spike_Specifiedy_by_Mizuno-san
 humanProteinID =  106815 , srsCov2ProteinID =  0
LLPLV
LADAG
STASA
TASAL
EAEVQ
DEDDS
common SCSs =  6
>XP_016884687.1 E3 ubiquitin-protein ligase HUWE1 isoform X8 [Homo sapiens]
 >SarsCov2Spike_Specifiedy_by_Mizuno-san
 humanProteinID =  106816 , srsCov2ProteinID =  0
LLPLV
LADAG
STASA
TASAL
EAEVQ
DEDDS
common SCSs =  6
>XP_016884688.1 E3 ubiquitin-protein ligase HUWE1 isoform X8 [Homo sapiens]
 >SarsCov2Spike_Specifiedy_by_Mizuno-san
 humanProteinID =  106817 , srsCov2ProteinID =  0
LLPLV
LADAG
STASA
TASAL
EAEVQ
DEDDS
common SCSs =  6
>XP_016884689.1 E3 ubiquitin-protein ligase HUWE1 isoform X8 [Homo sapiens]
 >SarsCov2Spike_Specifiedy_by_Mizuno-san
 humanProteinID =  106818 , srsCov2ProteinID =  0
LLPLV
LADAG
STASA
TASAL
EAEVQ
DEDDS
common SCSs =  6
>XP_016884690.1 E3 ubiquitin-protein ligase HUWE1 isoform X8 [Homo sapiens]
 >SarsCov2Spike_Specifiedy_by_Mizuno-san
 humanProteinID =  106819 , srsCov2ProteinID =  0
LLPLV
LADAG
STASA
TASAL
EAEVQ
DEDDS
common SCSs =  6
>XP_016884691.1 E3 ubiquitin-protein ligase HUWE1 isoform X8 [Homo sapiens]
 >SarsCov2Spike_Specifiedy_by_Mizuno-san
 humanProteinID =  106820 , srsCov2ProteinID =  0
LLPLV
LADAG
STASA
TASAL
EAEVQ
DEDDS
common SCSs =  6
>XP_016884692.1 E3 ubiquitin-protein ligase HUWE1 isoform X8 [Homo sapiens]
 >SarsCov2Spike_Specifiedy_by_Mizuno-san
 humanProteinID =  106821 , srsCov2ProteinID =  0
LLPLV
LADAG
STASA
TASAL
EAEVQ
DEDDS
common SCSs =  6
>XP_016884693.1 E3 ubiquitin-protein ligase HUWE1 isoform X10 [Homo sapiens]
 >SarsCov2Spike_Specifiedy_by_Mizuno-san
 humanProteinID =  106822 , srsCov2ProteinID =  0
LLPLV
LADAG
STASA
TASAL
EAEVQ
DEDDS
common SCSs =  6
>XP_016885567.1 probable ubiquitin carboxyl-terminal hydrolase FAF-Y isoform X1 [Homo sapiens]
 >SarsCov2Spike_Specifiedy_by_Mizuno-san
 humanProteinID =  107507 , srsCov2ProteinID =  0
IVRFP
VRFPN
ENSVA
SSTAS
SECVL
EQYIK
common SCSs =  6
>XP_024308090.1 E3 ubiquitin-protein ligase HUWE1 isoform X9 [Homo sapiens]
 >SarsCov2Spike_Specifiedy_by_Mizuno-san
 humanProteinID =  113156 , srsCov2ProteinID =  0
LLPLV
LADAG
STASA
TASAL
EAEVQ
DEDDS
common SCSs =  6
>NP_000258.1 neurofibromin isoform 2 [Homo sapiens]
 >SarsCov2Spike_Specifiedy_by_Mizuno-san
 humanProteinID =  244 , srsCov2ProteinID =  0
LALHR
LVKQL
VLGQS
PLQPE
SCLKG
common SCSs =  5
>NP_000375.3 apolipoprotein B-100 precursor [Homo sapiens]
 >SarsCov2Spike_Specifiedy_by_Mizuno-san
 humanProteinID =  357 , srsCov2ProteinID =  0
LFLPF
KLNDL
SSTAS
ALGKL
DVDLG
common SCSs =  5
>NP_001029.1 amiloride-sensitive sodium channel subunit alpha isoform 1 [Homo sapiens]
 >SarsCov2Spike_Specifiedy_by_Mizuno-san
 humanProteinID =  3053 , srsCov2ProteinID =  0
RRARS
RARSV
ARSVA
RSVAS
ILSRL
common SCSs =  5
>NP_001032895.2 nck-associated protein 5-like [Homo sapiens]
 >SarsCov2Spike_Specifiedy_by_Mizuno-san
 humanProteinID =  3190 , srsCov2ProteinID =  0
RVYSS
SPTKL
DSLSS
SLSST
ALGKL
common SCSs =  5
>NP_001035207.1 arf-GAP with Rho-GAP domain, ANK repeat and PH domain-containing protein 1 isoform c [Homo sapiens]
 >SarsCov2Spike_Specifiedy_by_Mizuno-san
 humanProteinID =  3394 , srsCov2ProteinID =  0
TLEIL
LEILD
VLPPL
EIRAS
EELDK
common SCSs =  5
>NP_001035957.1 neurofibromin isoform 1 [Homo sapiens]
 >SarsCov2Spike_Specifiedy_by_Mizuno-san
 humanProteinID =  3605 , srsCov2ProteinID =  0
LALHR
LVKQL
VLGQS
PLQPE
SCLKG
common SCSs =  5
>NP_001041665.1 homeodomain-interacting protein kinase 3 isoform 2 [Homo sapiens]
 >SarsCov2Spike_Specifiedy_by_Mizuno-san
 humanProteinID =  3748 , srsCov2ProteinID =  0
MDLEG
SPTKL
GCVIA
QPYRV
VSVIT
common SCSs =  5
>NP_001073986.1 histone-lysine N-methyltransferase SETD5 isoform 1 [Homo sapiens]
 >SarsCov2Spike_Specifiedy_by_Mizuno-san
 humanProteinID =  4144 , srsCov2ProteinID =  0
STGSN
SIAIP
GDIAA
AARDL
SLSST
common SCSs =  5
>NP_001092093.2 obscurin isoform b [Homo sapiens]
 >SarsCov2Spike_Specifiedy_by_Mizuno-san
 humanProteinID =  4522 , srsCov2ProteinID =  0
ALLAG
LQDVV
RLQSL
LQSLQ
VLGQS
common SCSs =  5
>NP_001092286.2 teneurin-4 [Homo sapiens]
 >SarsCov2Spike_Specifiedy_by_Mizuno-san
 humanProteinID =  4563 , srsCov2ProteinID =  0
GTTLD
RLFRK
VAIHA
LLAGT
QIITT
common SCSs =  5
>NP_001135451.1 TP53-binding protein 1 isoform 2 [Homo sapiens]
 >SarsCov2Spike_Specifiedy_by_Mizuno-san
 humanProteinID =  6632 , srsCov2ProteinID =  0
SLGAE
QDSLS
KQLSS
DLGDI
LGDIS
common SCSs =  5
>NP_001135452.1 TP53-binding protein 1 isoform 1 [Homo sapiens]
 >SarsCov2Spike_Specifiedy_by_Mizuno-san
 humanProteinID =  6633 , srsCov2ProteinID =  0
SLGAE
QDSLS
KQLSS
DLGDI
LGDIS
common SCSs =  5
>NP_001139669.1 coiled-coil domain-containing protein 168 [Homo sapiens]
 >SarsCov2Spike_Specifiedy_by_Mizuno-san
 humanProteinID =  7734 , srsCov2ProteinID =  0
LSETK
FPLQS
LTESN
KIQDS
DSLSS
common SCSs =  5
>NP_001153047.1 amiloride-sensitive sodium channel subunit alpha isoform 3 [Homo sapiens]
 >SarsCov2Spike_Specifiedy_by_Mizuno-san
 humanProteinID =  7879 , srsCov2ProteinID =  0
RRARS
RARSV
ARSVA
RSVAS
ILSRL
common SCSs =  5
>NP_001153048.1 amiloride-sensitive sodium channel subunit alpha isoform 2 [Homo sapiens]
 >SarsCov2Spike_Specifiedy_by_Mizuno-san
 humanProteinID =  7880 , srsCov2ProteinID =  0
RRARS
RARSV
ARSVA
RSVAS
ILSRL
common SCSs =  5
>NP_001157743.1 rho GTPase-activating protein 7 isoform 4 [Homo sapiens]
 >SarsCov2Spike_Specifiedy_by_Mizuno-san
 humanProteinID =  8316 , srsCov2ProteinID =  0
LDSKV
LFRKS
TEIYQ
SLSST
NLAAT
common SCSs =  5
>NP_001161846.1 dyslexia-associated protein KIAA0319 isoform b [Homo sapiens]
 >SarsCov2Spike_Specifiedy_by_Mizuno-san
 humanProteinID =  8927 , srsCov2ProteinID =  0
VLLPL
LIVNN
IVNNA
RSYLT
KTSVD
common SCSs =  5
>NP_001161847.1 dyslexia-associated protein KIAA0319 isoform a precursor [Homo sapiens]
 >SarsCov2Spike_Specifiedy_by_Mizuno-san
 humanProteinID =  8928 , srsCov2ProteinID =  0
VLLPL
LIVNN
IVNNA
RSYLT
KTSVD
common SCSs =  5
>NP_001161848.1 dyslexia-associated protein KIAA0319 isoform c [Homo sapiens]
 >SarsCov2Spike_Specifiedy_by_Mizuno-san
 humanProteinID =  8929 , srsCov2ProteinID =  0
VLLPL
LIVNN
IVNNA
RSYLT
KTSVD
common SCSs =  5
>NP_001161849.1 dyslexia-associated protein KIAA0319 isoform d precursor [Homo sapiens]
 >SarsCov2Spike_Specifiedy_by_Mizuno-san
 humanProteinID =  8930 , srsCov2ProteinID =  0
VLLPL
LIVNN
IVNNA
RSYLT
KTSVD
common SCSs =  5
>NP_001171134.1 telomere-associated protein RIF1 isoform 2 [Homo sapiens]
 >SarsCov2Spike_Specifiedy_by_Mizuno-san
 humanProteinID =  9584 , srsCov2ProteinID =  0
NGTKR
IYQAG
QKLIA
ISSVL
QLIRA
common SCSs =  5
>NP_001171135.1 telomere-associated protein RIF1 isoform 2 [Homo sapiens]
 >SarsCov2Spike_Specifiedy_by_Mizuno-san
 humanProteinID =  9585 , srsCov2ProteinID =  0
NGTKR
IYQAG
QKLIA
ISSVL
QLIRA
common SCSs =  5
>NP_001171136.1 telomere-associated protein RIF1 isoform 2 [Homo sapiens]
 >SarsCov2Spike_Specifiedy_by_Mizuno-san
 humanProteinID =  9586 , srsCov2ProteinID =  0
NGTKR
IYQAG
QKLIA
ISSVL
QLIRA
common SCSs =  5
>NP_001184033.1 histone-lysine N-methyltransferase 2A isoform 1 [Homo sapiens]
 >SarsCov2Spike_Specifiedy_by_Mizuno-san
 humanProteinID =  10499 , srsCov2ProteinID =  0
QVAVL
VNCTE
PPLLT
VVNQN
SSVLN
common SCSs =  5
>NP_001231509.1 transformation/transcription domain-associated protein isoform 1 [Homo sapiens]
 >SarsCov2Spike_Specifiedy_by_Mizuno-san
 humanProteinID =  12451 , srsCov2ProteinID =  0
VKQIY
KQIYK
TLADA
DILSR
IDRLI
common SCSs =  5
>NP_001240316.1 neural cell adhesion molecule L1-like protein isoform 2 precursor [Homo sapiens]
 >SarsCov2Spike_Specifiedy_by_Mizuno-san
 humanProteinID =  12702 , srsCov2ProteinID =  0
QPTES
VYSTG
YSTGS
STGSN
PSKPS
common SCSs =  5
>NP_001240317.1 neural cell adhesion molecule L1-like protein isoform 3 precursor [Homo sapiens]
 >SarsCov2Spike_Specifiedy_by_Mizuno-san
 humanProteinID =  12703 , srsCov2ProteinID =  0
QPTES
VYSTG
YSTGS
STGSN
PSKPS
common SCSs =  5
>NP_001245308.1 sodium bicarbonate cotransporter 3 isoform b [Homo sapiens]
 >SarsCov2Spike_Specifiedy_by_Mizuno-san
 humanProteinID =  13594 , srsCov2ProteinID =  0
DLCFT
TEVPV
LTGIA
TVLPP
PQSAP
common SCSs =  5
>NP_001245309.1 sodium bicarbonate cotransporter 3 isoform c [Homo sapiens]
 >SarsCov2Spike_Specifiedy_by_Mizuno-san
 humanProteinID =  13595 , srsCov2ProteinID =  0
DLCFT
TEVPV
LTGIA
TVLPP
PQSAP
common SCSs =  5
>NP_001248335.1 multiple PDZ domain protein isoform 2 [Homo sapiens]
 >SarsCov2Spike_Specifiedy_by_Mizuno-san
 humanProteinID =  13707 , srsCov2ProteinID =  0
TISVT
FSQIL
QDVVN
TYVPA
GVFVS
common SCSs =  5
>NP_001248336.1 multiple PDZ domain protein isoform 3 [Homo sapiens]
 >SarsCov2Spike_Specifiedy_by_Mizuno-san
 humanProteinID =  13708 , srsCov2ProteinID =  0
TISVT
FSQIL
QDVVN
TYVPA
GVFVS
common SCSs =  5
>NP_001258152.2 obscurin isoform IC [Homo sapiens]
 >SarsCov2Spike_Specifiedy_by_Mizuno-san
 humanProteinID =  14271 , srsCov2ProteinID =  0
ALLAG
LQDVV
RLQSL
LQSLQ
VLGQS
common SCSs =  5
>NP_001264198.1 otogelin isoform a precursor [Homo sapiens]
 >SarsCov2Spike_Specifiedy_by_Mizuno-san
 humanProteinID =  14748 , srsCov2ProteinID =  0
LVLLP
PVLPF
LITGR
ITGRL
FLHVT
common SCSs =  5
>NP_001265091.1 homeodomain-interacting protein kinase 3 isoform 2 [Homo sapiens]
 >SarsCov2Spike_Specifiedy_by_Mizuno-san
 humanProteinID =  14822 , srsCov2ProteinID =  0
MDLEG
SPTKL
GCVIA
QPYRV
VSVIT
common SCSs =  5
>NP_001265092.1 homeodomain-interacting protein kinase 3 isoform 2 [Homo sapiens]
 >SarsCov2Spike_Specifiedy_by_Mizuno-san
 humanProteinID =  14823 , srsCov2ProteinID =  0
MDLEG
SPTKL
GCVIA
QPYRV
VSVIT
common SCSs =  5
>NP_001265398.1 protein MON2 homolog isoform 2 [Homo sapiens]
 >SarsCov2Spike_Specifiedy_by_Mizuno-san
 humanProteinID =  15050 , srsCov2ProteinID =  0
SQPFL
QPFLM
SVLND
ILSRL
LDKVE
common SCSs =  5
>NP_001265399.1 protein MON2 homolog isoform 3 [Homo sapiens]
 >SarsCov2Spike_Specifiedy_by_Mizuno-san
 humanProteinID =  15051 , srsCov2ProteinID =  0
SQPFL
QPFLM
SVLND
ILSRL
LDKVE
common SCSs =  5
>NP_001265400.1 protein MON2 homolog isoform 4 [Homo sapiens]
 >SarsCov2Spike_Specifiedy_by_Mizuno-san
 humanProteinID =  15052 , srsCov2ProteinID =  0
SQPFL
QPFLM
SVLND
ILSRL
LDKVE
common SCSs =  5
>NP_001268669.1 FH1/FH2 domain-containing protein 3 isoform 3 [Homo sapiens]
 >SarsCov2Spike_Specifiedy_by_Mizuno-san
 humanProteinID =  15437 , srsCov2ProteinID =  0
DSKVG
GLTVL
LTVLP
TVLPP
DVDLG
common SCSs =  5
>NP_001273360.1 DNA polymerase zeta catalytic subunit isoform b [Homo sapiens]
 >SarsCov2Spike_Specifiedy_by_Mizuno-san
 humanProteinID =  16629 , srsCov2ProteinID =  0
DSSSG
EILPV
ILPVS
KLIAN
SLSST
common SCSs =  5
>NP_001273361.1 DNA polymerase zeta catalytic subunit isoform b [Homo sapiens]
 >SarsCov2Spike_Specifiedy_by_Mizuno-san
 humanProteinID =  16630 , srsCov2ProteinID =  0
DSSSG
EILPV
ILPVS
KLIAN
SLSST
common SCSs =  5
>NP_001278992.1 otogelin isoform b precursor [Homo sapiens]
 >SarsCov2Spike_Specifiedy_by_Mizuno-san
 humanProteinID =  18161 , srsCov2ProteinID =  0
LVLLP
PVLPF
LITGR
ITGRL
FLHVT
common SCSs =  5
>NP_001280555.1 putative maltase-glucoamylase-like protein FLJ16351 [Homo sapiens]
 >SarsCov2Spike_Specifiedy_by_Mizuno-san
 humanProteinID =  18230 , srsCov2ProteinID =  0
YQTSN
TISVT
ISVTT
QILPD
TYVTQ
common SCSs =  5
>NP_001295089.1 pecanex-like protein 1 isoform 2 [Homo sapiens]
 >SarsCov2Spike_Specifiedy_by_Mizuno-san
 humanProteinID =  19844 , srsCov2ProteinID =  0
AIHVS
TLLAL
DPLSE
SVASQ
VASQS
common SCSs =  5
>NP_001303597.1 rho GTPase-activating protein 7 isoform 5 [Homo sapiens]
 >SarsCov2Spike_Specifiedy_by_Mizuno-san
 humanProteinID =  20261 , srsCov2ProteinID =  0
LDSKV
LFRKS
TEIYQ
SLSST
NLAAT
common SCSs =  5
>NP_001304824.1 protein mono-ADP-ribosyltransferase PARP10 isoform 2 [Homo sapiens]
 >SarsCov2Spike_Specifiedy_by_Mizuno-san
 humanProteinID =  20546 , srsCov2ProteinID =  0
GVYFA
LALHR
ALHRS
ALLAG
TTAPA
common SCSs =  5
>NP_001307676.1 envoplakin isoform 1 [Homo sapiens]
 >SarsCov2Spike_Specifiedy_by_Mizuno-san
 humanProteinID =  21738 , srsCov2ProteinID =  0
AISSV
RLQSL
AQEKN
QKEID
EIDRL
common SCSs =  5
>NP_001308032.1 sodium bicarbonate cotransporter 3 isoform d [Homo sapiens]
 >SarsCov2Spike_Specifiedy_by_Mizuno-san
 humanProteinID =  21997 , srsCov2ProteinID =  0
DLCFT
TEVPV
LTGIA
TVLPP
PQSAP
common SCSs =  5
>NP_001308033.1 sodium bicarbonate cotransporter 3 isoform e [Homo sapiens]
 >SarsCov2Spike_Specifiedy_by_Mizuno-san
 humanProteinID =  21998 , srsCov2ProteinID =  0
DLCFT
TEVPV
LTGIA
TVLPP
PQSAP
common SCSs =  5
>NP_001308034.1 sodium bicarbonate cotransporter 3 isoform f [Homo sapiens]
 >SarsCov2Spike_Specifiedy_by_Mizuno-san
 humanProteinID =  21999 , srsCov2ProteinID =  0
DLCFT
TEVPV
LTGIA
TVLPP
PQSAP
common SCSs =  5
>NP_001308035.1 sodium bicarbonate cotransporter 3 isoform g [Homo sapiens]
 >SarsCov2Spike_Specifiedy_by_Mizuno-san
 humanProteinID =  22000 , srsCov2ProteinID =  0
DLCFT
TEVPV
LTGIA
TVLPP
PQSAP
common SCSs =  5
>NP_001308036.1 sodium bicarbonate cotransporter 3 isoform h [Homo sapiens]
 >SarsCov2Spike_Specifiedy_by_Mizuno-san
 humanProteinID =  22001 , srsCov2ProteinID =  0
DLCFT
TEVPV
LTGIA
TVLPP
PQSAP
common SCSs =  5
>NP_001308037.1 sodium bicarbonate cotransporter 3 isoform i [Homo sapiens]
 >SarsCov2Spike_Specifiedy_by_Mizuno-san
 humanProteinID =  22002 , srsCov2ProteinID =  0
DLCFT
TEVPV
LTGIA
TVLPP
PQSAP
common SCSs =  5
>NP_001308236.1 protein NPAT isoform 1 [Homo sapiens]
 >SarsCov2Spike_Specifiedy_by_Mizuno-san
 humanProteinID =  22153 , srsCov2ProteinID =  0
EILPV
ILPVS
NFSQI
DSLSS
SLSST
common SCSs =  5
>NP_001317566.1 multiple PDZ domain protein isoform 4 [Homo sapiens]
 >SarsCov2Spike_Specifiedy_by_Mizuno-san
 humanProteinID =  24937 , srsCov2ProteinID =  0
TISVT
FSQIL
QDVVN
TYVPA
GVFVS
common SCSs =  5
>NP_001332853.1 thyroid adenoma-associated protein isoform e [Homo sapiens]
 >SarsCov2Spike_Specifiedy_by_Mizuno-san
 humanProteinID =  25239 , srsCov2ProteinID =  0
RFQTL
TLKSF
NASVV
ASVVN
SVVNI
common SCSs =  5
>NP_001333697.1 unconventional myosin-XVIIIa isoform f [Homo sapiens]
 >SarsCov2Spike_Specifiedy_by_Mizuno-san
 humanProteinID =  25640 , srsCov2ProteinID =  0
NATRF
FSQIL
LIRAA
IRAAE
RAAEI
common SCSs =  5
>NP_001335010.1 rho GTPase-activating protein 7 isoform 1 [Homo sapiens]
 >SarsCov2Spike_Specifiedy_by_Mizuno-san
 humanProteinID =  25960 , srsCov2ProteinID =  0
LDSKV
LFRKS
TEIYQ
SLSST
NLAAT
common SCSs =  5
>NP_001335011.1 rho GTPase-activating protein 7 isoform 4 [Homo sapiens]
 >SarsCov2Spike_Specifiedy_by_Mizuno-san
 humanProteinID =  25961 , srsCov2ProteinID =  0
LDSKV
LFRKS
TEIYQ
SLSST
NLAAT
common SCSs =  5
>NP_001335012.1 rho GTPase-activating protein 7 isoform 4 [Homo sapiens]
 >SarsCov2Spike_Specifiedy_by_Mizuno-san
 humanProteinID =  25962 , srsCov2ProteinID =  0
LDSKV
LFRKS
TEIYQ
SLSST
NLAAT
common SCSs =  5
>NP_001335013.1 rho GTPase-activating protein 7 isoform 4 [Homo sapiens]
 >SarsCov2Spike_Specifiedy_by_Mizuno-san
 humanProteinID =  25963 , srsCov2ProteinID =  0
LDSKV
LFRKS
TEIYQ
SLSST
NLAAT
common SCSs =  5
>NP_001336992.1 protein TANC1 isoform 4 [Homo sapiens]
 >SarsCov2Spike_Specifiedy_by_Mizuno-san
 humanProteinID =  27062 , srsCov2ProteinID =  0
TRAGC
KRSFI
RSFIE
SSTAS
FPREG
common SCSs =  5
>NP_001336993.1 protein TANC1 isoform 5 [Homo sapiens]
 >SarsCov2Spike_Specifiedy_by_Mizuno-san
 humanProteinID =  27063 , srsCov2ProteinID =  0
TRAGC
KRSFI
RSFIE
SSTAS
FPREG
common SCSs =  5
>NP_001336994.1 protein TANC1 isoform 5 [Homo sapiens]
 >SarsCov2Spike_Specifiedy_by_Mizuno-san
 humanProteinID =  27064 , srsCov2ProteinID =  0
TRAGC
KRSFI
RSFIE
SSTAS
FPREG
common SCSs =  5
>NP_001337332.1 dyslexia-associated protein KIAA0319 isoform a precursor [Homo sapiens]
 >SarsCov2Spike_Specifiedy_by_Mizuno-san
 humanProteinID =  27248 , srsCov2ProteinID =  0
VLLPL
LIVNN
IVNNA
RSYLT
KTSVD
common SCSs =  5
>NP_001337333.1 dyslexia-associated protein KIAA0319 isoform f [Homo sapiens]
 >SarsCov2Spike_Specifiedy_by_Mizuno-san
 humanProteinID =  27249 , srsCov2ProteinID =  0
VLLPL
LIVNN
IVNNA
RSYLT
KTSVD
common SCSs =  5
>NP_001337334.1 dyslexia-associated protein KIAA0319 isoform g precursor [Homo sapiens]
 >SarsCov2Spike_Specifiedy_by_Mizuno-san
 humanProteinID =  27250 , srsCov2ProteinID =  0
VLLPL
LIVNN
IVNNA
RSYLT
KTSVD
common SCSs =  5
>NP_001337335.1 dyslexia-associated protein KIAA0319 isoform c [Homo sapiens]
 >SarsCov2Spike_Specifiedy_by_Mizuno-san
 humanProteinID =  27251 , srsCov2ProteinID =  0
VLLPL
LIVNN
IVNNA
RSYLT
KTSVD
common SCSs =  5
>NP_001337336.1 dyslexia-associated protein KIAA0319 isoform h precursor [Homo sapiens]
 >SarsCov2Spike_Specifiedy_by_Mizuno-san
 humanProteinID =  27252 , srsCov2ProteinID =  0
VLLPL
LIVNN
IVNNA
RSYLT
KTSVD
common SCSs =  5
>NP_001337337.1 dyslexia-associated protein KIAA0319 isoform h precursor [Homo sapiens]
 >SarsCov2Spike_Specifiedy_by_Mizuno-san
 humanProteinID =  27253 , srsCov2ProteinID =  0
VLLPL
LIVNN
IVNNA
RSYLT
KTSVD
common SCSs =  5
>NP_001352055.1 nuclear pore complex protein Nup98-Nup96 isoform 6 precursor [Homo sapiens]
 >SarsCov2Spike_Specifiedy_by_Mizuno-san
 humanProteinID =  31989 , srsCov2ProteinID =  0
GCVIA
GTNTS
TNTSN
LLTDE
ALLAG
common SCSs =  5
>NP_001354553.1 zinc finger protein 469 [Homo sapiens]
 >SarsCov2Spike_Specifiedy_by_Mizuno-san
 humanProteinID =  33047 , srsCov2ProteinID =  0
DCALD
ILPVS
LADAG
SSTAS
PQSAP
common SCSs =  5
>NP_001354977.1 nck-associated protein 5-like [Homo sapiens]
 >SarsCov2Spike_Specifiedy_by_Mizuno-san
 humanProteinID =  33324 , srsCov2ProteinID =  0
RVYSS
SPTKL
DSLSS
SLSST
ALGKL
common SCSs =  5
>NP_001359007.1 DNA polymerase zeta catalytic subunit isoform a [Homo sapiens]
 >SarsCov2Spike_Specifiedy_by_Mizuno-san
 humanProteinID =  35132 , srsCov2ProteinID =  0
DSSSG
EILPV
ILPVS
KLIAN
SLSST
common SCSs =  5
>NP_001362342.1 multiple PDZ domain protein isoform 5 [Homo sapiens]
 >SarsCov2Spike_Specifiedy_by_Mizuno-san
 humanProteinID =  35528 , srsCov2ProteinID =  0
TISVT
FSQIL
QDVVN
TYVPA
GVFVS
common SCSs =  5
>NP_001362345.1 multiple PDZ domain protein isoform 2 [Homo sapiens]
 >SarsCov2Spike_Specifiedy_by_Mizuno-san
 humanProteinID =  35529 , srsCov2ProteinID =  0
TISVT
FSQIL
QDVVN
TYVPA
GVFVS
common SCSs =  5
>NP_001362346.1 multiple PDZ domain protein isoform 2 [Homo sapiens]
 >SarsCov2Spike_Specifiedy_by_Mizuno-san
 humanProteinID =  35530 , srsCov2ProteinID =  0
TISVT
FSQIL
QDVVN
TYVPA
GVFVS
common SCSs =  5
>NP_001362347.1 multiple PDZ domain protein isoform 2 [Homo sapiens]
 >SarsCov2Spike_Specifiedy_by_Mizuno-san
 humanProteinID =  35531 , srsCov2ProteinID =  0
TISVT
FSQIL
QDVVN
TYVPA
GVFVS
common SCSs =  5
>NP_001362348.1 multiple PDZ domain protein isoform 3 [Homo sapiens]
 >SarsCov2Spike_Specifiedy_by_Mizuno-san
 humanProteinID =  35532 , srsCov2ProteinID =  0
TISVT
FSQIL
QDVVN
TYVPA
GVFVS
common SCSs =  5
>NP_001362349.1 multiple PDZ domain protein isoform 6 [Homo sapiens]
 >SarsCov2Spike_Specifiedy_by_Mizuno-san
 humanProteinID =  35533 , srsCov2ProteinID =  0
TISVT
FSQIL
QDVVN
TYVPA
GVFVS
common SCSs =  5
>NP_001362350.1 multiple PDZ domain protein isoform 6 [Homo sapiens]
 >SarsCov2Spike_Specifiedy_by_Mizuno-san
 humanProteinID =  35534 , srsCov2ProteinID =  0
TISVT
FSQIL
QDVVN
TYVPA
GVFVS
common SCSs =  5
>NP_001362351.1 multiple PDZ domain protein isoform 6 [Homo sapiens]
 >SarsCov2Spike_Specifiedy_by_Mizuno-san
 humanProteinID =  35535 , srsCov2ProteinID =  0
TISVT
FSQIL
QDVVN
TYVPA
GVFVS
common SCSs =  5
>NP_001362352.1 multiple PDZ domain protein isoform 6 [Homo sapiens]
 >SarsCov2Spike_Specifiedy_by_Mizuno-san
 humanProteinID =  35536 , srsCov2ProteinID =  0
TISVT
FSQIL
QDVVN
TYVPA
GVFVS
common SCSs =  5
>NP_001362353.1 multiple PDZ domain protein isoform 6 [Homo sapiens]
 >SarsCov2Spike_Specifiedy_by_Mizuno-san
 humanProteinID =  35537 , srsCov2ProteinID =  0
TISVT
FSQIL
QDVVN
TYVPA
GVFVS
common SCSs =  5
>NP_001362354.1 multiple PDZ domain protein isoform 7 [Homo sapiens]
 >SarsCov2Spike_Specifiedy_by_Mizuno-san
 humanProteinID =  35538 , srsCov2ProteinID =  0
TISVT
FSQIL
QDVVN
TYVPA
GVFVS
common SCSs =  5
>NP_001362355.1 multiple PDZ domain protein isoform 7 [Homo sapiens]
 >SarsCov2Spike_Specifiedy_by_Mizuno-san
 humanProteinID =  35539 , srsCov2ProteinID =  0
TISVT
FSQIL
QDVVN
TYVPA
GVFVS
common SCSs =  5
>NP_001362453.1 transformation/transcription domain-associated protein isoform 3 [Homo sapiens]
 >SarsCov2Spike_Specifiedy_by_Mizuno-san
 humanProteinID =  35625 , srsCov2ProteinID =  0
VKQIY
KQIYK
TLADA
DILSR
IDRLI
common SCSs =  5
>NP_001365054.1 baculoviral IAP repeat-containing protein 6 isoform 2 [Homo sapiens]
 >SarsCov2Spike_Specifiedy_by_Mizuno-san
 humanProteinID =  37501 , srsCov2ProteinID =  0
LTPGD
TLEIL
RRARS
GTITS
GAGAA
common SCSs =  5
>NP_001365707.1 multiple PDZ domain protein isoform 4 [Homo sapiens]
 >SarsCov2Spike_Specifiedy_by_Mizuno-san
 humanProteinID =  37852 , srsCov2ProteinID =  0
TISVT
FSQIL
QDVVN
TYVPA
GVFVS
common SCSs =  5
>NP_001371376.1 sorbin and SH3 domain-containing protein 1 isoform 26 [Homo sapiens]
 >SarsCov2Spike_Specifiedy_by_Mizuno-san
 humanProteinID =  38870 , srsCov2ProteinID =  0
STQDL
PGDSS
FNFNG
RSVAS
DIAAR
common SCSs =  5
>NP_001371377.1 sorbin and SH3 domain-containing protein 1 isoform 27 [Homo sapiens]
 >SarsCov2Spike_Specifiedy_by_Mizuno-san
 humanProteinID =  38871 , srsCov2ProteinID =  0
STQDL
PGDSS
FNFNG
RSVAS
DIAAR
common SCSs =  5
>NP_001371378.1 sorbin and SH3 domain-containing protein 1 isoform 28 [Homo sapiens]
 >SarsCov2Spike_Specifiedy_by_Mizuno-san
 humanProteinID =  38872 , srsCov2ProteinID =  0
STQDL
PGDSS
FNFNG
RSVAS
DIAAR
common SCSs =  5
>NP_001371379.1 sorbin and SH3 domain-containing protein 1 isoform 29 [Homo sapiens]
 >SarsCov2Spike_Specifiedy_by_Mizuno-san
 humanProteinID =  38873 , srsCov2ProteinID =  0
STQDL
PGDSS
FNFNG
RSVAS
DIAAR
common SCSs =  5
>NP_001371381.1 sorbin and SH3 domain-containing protein 1 isoform 31 [Homo sapiens]
 >SarsCov2Spike_Specifiedy_by_Mizuno-san
 humanProteinID =  38875 , srsCov2ProteinID =  0
STQDL
PGDSS
FNFNG
RSVAS
DIAAR
common SCSs =  5
>NP_001373054.1 obscurin isoform c [Homo sapiens]
 >SarsCov2Spike_Specifiedy_by_Mizuno-san
 humanProteinID =  40436 , srsCov2ProteinID =  0
ALLAG
LQDVV
RLQSL
LQSLQ
VLGQS
common SCSs =  5
>NP_001979.2 envoplakin isoform 2 [Homo sapiens]
 >SarsCov2Spike_Specifiedy_by_Mizuno-san
 humanProteinID =  41055 , srsCov2ProteinID =  0
AISSV
RLQSL
AQEKN
QKEID
EIDRL
common SCSs =  5
>NP_002510.2 protein NPAT isoform 2 [Homo sapiens]
 >SarsCov2Spike_Specifiedy_by_Mizuno-san
 humanProteinID =  41553 , srsCov2ProteinID =  0
EILPV
ILPVS
NFSQI
DSLSS
SLSST
common SCSs =  5
>NP_002903.3 DNA polymerase zeta catalytic subunit isoform a [Homo sapiens]
 >SarsCov2Spike_Specifiedy_by_Mizuno-san
 humanProteinID =  41925 , srsCov2ProteinID =  0
DSSSG
EILPV
ILPVS
KLIAN
SLSST
common SCSs =  5
>NP_003473.3 histone-lysine N-methyltransferase 2D [Homo sapiens]
 >SarsCov2Spike_Specifiedy_by_Mizuno-san
 humanProteinID =  42446 , srsCov2ProteinID =  0
QVAVL
IEDLL
PPLLT
AKNLN
LQELG
common SCSs =  5
>NP_003487.1 transformation/transcription domain-associated protein isoform 2 [Homo sapiens]
 >SarsCov2Spike_Specifiedy_by_Mizuno-san
 humanProteinID =  42460 , srsCov2ProteinID =  0
VKQIY
KQIYK
TLADA
DILSR
IDRLI
common SCSs =  5
>NP_003606.3 sodium bicarbonate cotransporter 3 isoform a [Homo sapiens]
 >SarsCov2Spike_Specifiedy_by_Mizuno-san
 humanProteinID =  42570 , srsCov2ProteinID =  0
DLCFT
TEVPV
LTGIA
TVLPP
PQSAP
common SCSs =  5
>NP_003820.2 multiple PDZ domain protein isoform 1 [Homo sapiens]
 >SarsCov2Spike_Specifiedy_by_Mizuno-san
 humanProteinID =  42771 , srsCov2ProteinID =  0
TISVT
FSQIL
QDVVN
TYVPA
GVFVS
common SCSs =  5
>NP_004406.2 desmoplakin isoform I [Homo sapiens]
 >SarsCov2Spike_Specifiedy_by_Mizuno-san
 humanProteinID =  43300 , srsCov2ProteinID =  0
ITRFQ
ARDLI
LDKVE
DKVEA
RLQSL
common SCSs =  5
>NP_005036.2 reelin isoform a precursor [Homo sapiens]
 >SarsCov2Spike_Specifiedy_by_Mizuno-san
 humanProteinID =  43887 , srsCov2ProteinID =  0
TTLDS
NATRF
ASQSI
VFVSN
EPQII
common SCSs =  5
>NP_005648.1 TP53-binding protein 1 isoform 3 [Homo sapiens]
 >SarsCov2Spike_Specifiedy_by_Mizuno-san
 humanProteinID =  44453 , srsCov2ProteinID =  0
SLGAE
QDSLS
KQLSS
DLGDI
LGDIS
common SCSs =  5
>NP_005725.3 homeodomain-interacting protein kinase 3 isoform 1 [Homo sapiens]
 >SarsCov2Spike_Specifiedy_by_Mizuno-san
 humanProteinID =  44521 , srsCov2ProteinID =  0
MDLEG
SPTKL
GCVIA
QPYRV
VSVIT
common SCSs =  5
>NP_005886.2 golgin subfamily A member 3 isoform 1 [Homo sapiens]
 >SarsCov2Spike_Specifiedy_by_Mizuno-san
 humanProteinID =  44660 , srsCov2ProteinID =  0
ESNKK
QDSLS
DSLSS
LQSLQ
KEELD
common SCSs =  5
>NP_005924.2 histone-lysine N-methyltransferase 2A isoform 2 precursor [Homo sapiens]
 >SarsCov2Spike_Specifiedy_by_Mizuno-san
 humanProteinID =  44698 , srsCov2ProteinID =  0
QVAVL
VNCTE
PPLLT
VVNQN
SSVLN
common SCSs =  5
>NP_005951.1 mucin-3A precursor [Homo sapiens]
 >SarsCov2Spike_Specifiedy_by_Mizuno-san
 humanProteinID =  44720 , srsCov2ProteinID =  0
TNSFT
SFTRG
TAGAA
TITSG
AGAAL
common SCSs =  5
>NP_006085.2 rho GTPase-activating protein 7 isoform 2 [Homo sapiens]
 >SarsCov2Spike_Specifiedy_by_Mizuno-san
 humanProteinID =  44842 , srsCov2ProteinID =  0
LDSKV
LFRKS
TEIYQ
SLSST
NLAAT
common SCSs =  5
>NP_006605.2 neural cell adhesion molecule L1-like protein isoform 1 precursor [Homo sapiens]
 >SarsCov2Spike_Specifiedy_by_Mizuno-san
 humanProteinID =  45319 , srsCov2ProteinID =  0
QPTES
VYSTG
YSTGS
STGSN
PSKPS
common SCSs =  5
>NP_055325.2 protein piccolo isoform 2 [Homo sapiens]
 >SarsCov2Spike_Specifiedy_by_Mizuno-san
 humanProteinID =  46944 , srsCov2ProteinID =  0
TTLDS
KTQSL
PPIKD
PDPSK
TDNTF
common SCSs =  5
>NP_055624.2 dyslexia-associated protein KIAA0319 isoform a precursor [Homo sapiens]
 >SarsCov2Spike_Specifiedy_by_Mizuno-san
 humanProteinID =  47186 , srsCov2ProteinID =  0
VLLPL
LIVNN
IVNNA
RSYLT
KTSVD
common SCSs =  5
>NP_055797.2 pecanex-like protein 1 isoform 1 [Homo sapiens]
 >SarsCov2Spike_Specifiedy_by_Mizuno-san
 humanProteinID =  47343 , srsCov2ProteinID =  0
AIHVS
TLLAL
DPLSE
SVASQ
VASQS
common SCSs =  5
>NP_055841.2 protein MON2 homolog isoform 1 [Homo sapiens]
 >SarsCov2Spike_Specifiedy_by_Mizuno-san
 humanProteinID =  47376 , srsCov2ProteinID =  0
SQPFL
QPFLM
SVLND
ILSRL
LDKVE
common SCSs =  5
>NP_055987.2 protein PRRC2C [Homo sapiens]
 >SarsCov2Spike_Specifiedy_by_Mizuno-san
 humanProteinID =  47499 , srsCov2ProteinID =  0
VSQPF
APATV
VLNDI
LGDIS
GDISG
common SCSs =  5
>NP_056110.2 structural maintenance of chromosomes flexible hinge domain-containing protein 1 [Homo sapiens]
 >SarsCov2Spike_Specifiedy_by_Mizuno-san
 humanProteinID =  47600 , srsCov2ProteinID =  0
LVRDL
SIVRF
DLCFT
RSVAS
ILPDP
common SCSs =  5
>NP_057336.3 baculoviral IAP repeat-containing protein 6 isoform 1 [Homo sapiens]
 >SarsCov2Spike_Specifiedy_by_Mizuno-san
 humanProteinID =  48252 , srsCov2ProteinID =  0
LTPGD
TLEIL
RRARS
GTITS
GAGAA
common SCSs =  5
>NP_060621.3 telomere-associated protein RIF1 isoform 1 [Homo sapiens]
 >SarsCov2Spike_Specifiedy_by_Mizuno-san
 humanProteinID =  49183 , srsCov2ProteinID =  0
NGTKR
IYQAG
QKLIA
ISSVL
QLIRA
common SCSs =  5
>NP_065772.1 acrosomal protein KIAA1210 [Homo sapiens]
 >SarsCov2Spike_Specifiedy_by_Mizuno-san
 humanProteinID =  50214 , srsCov2ProteinID =  0
LPLVS
QLSSN
LSSNF
CCSCL
GCCSC
common SCSs =  5
>NP_065816.2 E3 ubiquitin-protein ligase UBR4 [Homo sapiens]
 >SarsCov2Spike_Specifiedy_by_Mizuno-san
 humanProteinID =  50247 , srsCov2ProteinID =  0
GGVSV
ALLAG
DILSR
LQELG
DDSEP
common SCSs =  5
>NP_065996.1 WD repeat- and FYVE domain-containing protein 4 isoform 1 [Homo sapiens]
 >SarsCov2Spike_Specifiedy_by_Mizuno-san
 humanProteinID =  50392 , srsCov2ProteinID =  0
STQDL
QSLLI
CNGVE
EDDSE
DDSEP
common SCSs =  5
>NP_079350.5 extracellular matrix protein FRAS1 isoform 1 precursor [Homo sapiens]
 >SarsCov2Spike_Specifiedy_by_Mizuno-san
 humanProteinID =  51854 , srsCov2ProteinID =  0
SFTVE
YQAGS
EDLLF
VTLAD
CGKGY
common SCSs =  5
>NP_116178.2 protein mono-ADP-ribosyltransferase PARP10 isoform 1 [Homo sapiens]
 >SarsCov2Spike_Specifiedy_by_Mizuno-san
 humanProteinID =  52963 , srsCov2ProteinID =  0
GVYFA
LALHR
ALHRS
ALLAG
TTAPA
common SCSs =  5
>NP_149015.2 protein piccolo isoform 1 [Homo sapiens]
 >SarsCov2Spike_Specifiedy_by_Mizuno-san
 humanProteinID =  53136 , srsCov2ProteinID =  0
TTLDS
KTQSL
PPIKD
PDPSK
TDNTF
common SCSs =  5
>NP_203752.2 protein TANC1 isoform 1 [Homo sapiens]
 >SarsCov2Spike_Specifiedy_by_Mizuno-san
 humanProteinID =  53373 , srsCov2ProteinID =  0
TRAGC
KRSFI
RSFIE
SSTAS
FPREG
common SCSs =  5
>NP_443075.3 obscurin isoform a [Homo sapiens]
 >SarsCov2Spike_Specifiedy_by_Mizuno-san
 humanProteinID =  53502 , srsCov2ProteinID =  0
GVSPT
ALLAG
LQDVV
RLQSL
LQSLQ
common SCSs =  5
>NP_443150.3 VPS10 domain-containing receptor SorCS1 isoform a precursor [Homo sapiens]
 >SarsCov2Spike_Specifiedy_by_Mizuno-san
 humanProteinID =  53564 , srsCov2ProteinID =  0
TRGVY
PLVDL
PGDSS
SALLA
ALLAG
common SCSs =  5
>NP_619639.3 fibrocystin isoform 1 precursor [Homo sapiens]
 >SarsCov2Spike_Specifiedy_by_Mizuno-san
 humanProteinID =  54471 , srsCov2ProteinID =  0
QDLFL
VIRGD
GSTPC
KLQDV
ITGRL
common SCSs =  5
>NP_689914.3 ATP-binding cassette sub-family A member 13 [Homo sapiens]
 >SarsCov2Spike_Specifiedy_by_Mizuno-san
 humanProteinID =  55719 , srsCov2ProteinID =  0
YLQPR
LEILD
FNFSQ
SALLA
NLAAT
common SCSs =  5
>NP_733842.2 fibrocystin isoform 2 precursor [Homo sapiens]
 >SarsCov2Spike_Specifiedy_by_Mizuno-san
 humanProteinID =  56209 , srsCov2ProteinID =  0
QDLFL
VIRGD
GSTPC
KLQDV
ITGRL
common SCSs =  5
>NP_774959.1 reelin isoform b precursor [Homo sapiens]
 >SarsCov2Spike_Specifiedy_by_Mizuno-san
 humanProteinID =  56392 , srsCov2ProteinID =  0
TTLDS
NATRF
ASQSI
VFVSN
EPQII
common SCSs =  5
>NP_775899.3 dynein heavy chain 17, axonemal [Homo sapiens]
 >SarsCov2Spike_Specifiedy_by_Mizuno-san
 humanProteinID =  56593 , srsCov2ProteinID =  0
RTQLP
LDPLS
KKFLP
YSTGS
LIGAE
common SCSs =  5
>NP_872584.2 rho GTPase-activating protein 7 isoform 1 [Homo sapiens]
 >SarsCov2Spike_Specifiedy_by_Mizuno-san
 humanProteinID =  57676 , srsCov2ProteinID =  0
LDSKV
LFRKS
TEIYQ
SLSST
NLAAT
common SCSs =  5
>NP_996816.3 usherin isoform B precursor [Homo sapiens]
 >SarsCov2Spike_Specifiedy_by_Mizuno-san
 humanProteinID =  58959 , srsCov2ProteinID =  0
NSASF
LYRLF
GFQPT
NGVGY
TRAGC
common SCSs =  5
>NP_997244.4 FRAS1-related extracellular matrix protein 2 precursor [Homo sapiens]
 >SarsCov2Spike_Specifiedy_by_Mizuno-san
 humanProteinID =  59090 , srsCov2ProteinID =  0
KSFTV
DSFVI
GAENS
CSNLL
SEPVL
common SCSs =  5
>XP_005245072.1 protein PRRC2C isoform X1 [Homo sapiens]
 >SarsCov2Spike_Specifiedy_by_Mizuno-san
 humanProteinID =  59313 , srsCov2ProteinID =  0
VSQPF
APATV
VLNDI
LGDIS
GDISG
common SCSs =  5
>XP_005245073.1 protein PRRC2C isoform X2 [Homo sapiens]
 >SarsCov2Spike_Specifiedy_by_Mizuno-san
 humanProteinID =  59314 , srsCov2ProteinID =  0
VSQPF
APATV
VLNDI
LGDIS
GDISG
common SCSs =  5
>XP_005245074.1 protein PRRC2C isoform X3 [Homo sapiens]
 >SarsCov2Spike_Specifiedy_by_Mizuno-san
 humanProteinID =  59315 , srsCov2ProteinID =  0
VSQPF
APATV
VLNDI
LGDIS
GDISG
common SCSs =  5
>XP_005245075.1 protein PRRC2C isoform X4 [Homo sapiens]
 >SarsCov2Spike_Specifiedy_by_Mizuno-san
 humanProteinID =  59316 , srsCov2ProteinID =  0
VSQPF
APATV
VLNDI
LGDIS
GDISG
common SCSs =  5
>XP_005245076.1 protein PRRC2C isoform X7 [Homo sapiens]
 >SarsCov2Spike_Specifiedy_by_Mizuno-san
 humanProteinID =  59317 , srsCov2ProteinID =  0
VSQPF
APATV
VLNDI
LGDIS
GDISG
common SCSs =  5
>XP_005245077.1 protein PRRC2C isoform X8 [Homo sapiens]
 >SarsCov2Spike_Specifiedy_by_Mizuno-san
 humanProteinID =  59318 , srsCov2ProteinID =  0
VSQPF
APATV
VLNDI
LGDIS
GDISG
common SCSs =  5
>XP_005245080.1 protein PRRC2C isoform X10 [Homo sapiens]
 >SarsCov2Spike_Specifiedy_by_Mizuno-san
 humanProteinID =  59319 , srsCov2ProteinID =  0
VSQPF
APATV
VLNDI
LGDIS
GDISG
common SCSs =  5
>XP_005245081.1 protein PRRC2C isoform X11 [Homo sapiens]
 >SarsCov2Spike_Specifiedy_by_Mizuno-san
 humanProteinID =  59320 , srsCov2ProteinID =  0
VSQPF
APATV
VLNDI
LGDIS
GDISG
common SCSs =  5
>XP_005245082.1 protein PRRC2C isoform X13 [Homo sapiens]
 >SarsCov2Spike_Specifiedy_by_Mizuno-san
 humanProteinID =  59321 , srsCov2ProteinID =  0
VSQPF
APATV
VLNDI
LGDIS
GDISG
common SCSs =  5
>XP_005245083.1 protein PRRC2C isoform X14 [Homo sapiens]
 >SarsCov2Spike_Specifiedy_by_Mizuno-san
 humanProteinID =  59322 , srsCov2ProteinID =  0
VSQPF
APATV
VLNDI
LGDIS
GDISG
common SCSs =  5
>XP_005246722.1 telomere-associated protein RIF1 isoform X1 [Homo sapiens]
 >SarsCov2Spike_Specifiedy_by_Mizuno-san
 humanProteinID =  59697 , srsCov2ProteinID =  0
NGTKR
IYQAG
QKLIA
ISSVL
QLIRA
common SCSs =  5
>XP_005246975.1 protein TANC1 isoform X7 [Homo sapiens]
 >SarsCov2Spike_Specifiedy_by_Mizuno-san
 humanProteinID =  59757 , srsCov2ProteinID =  0
TRAGC
KRSFI
RSFIE
SSTAS
FPREG
common SCSs =  5
>XP_005252786.1 homeodomain-interacting protein kinase 3 isoform X1 [Homo sapiens]
 >SarsCov2Spike_Specifiedy_by_Mizuno-san
 humanProteinID =  60934 , srsCov2ProteinID =  0
MDLEG
SPTKL
GCVIA
QPYRV
VSVIT
common SCSs =  5
>XP_005254300.1 MAX gene-associated protein isoform X1 [Homo sapiens]
 >SarsCov2Spike_Specifiedy_by_Mizuno-san
 humanProteinID =  61185 , srsCov2ProteinID =  0
NVVIK
LMDLE
LDPLS
PSKPS
ITGRL
common SCSs =  5
>XP_005254301.1 MAX gene-associated protein isoform X1 [Homo sapiens]
 >SarsCov2Spike_Specifiedy_by_Mizuno-san
 humanProteinID =  61186 , srsCov2ProteinID =  0
NVVIK
LMDLE
LDPLS
PSKPS
ITGRL
common SCSs =  5
>XP_005254302.1 MAX gene-associated protein isoform X1 [Homo sapiens]
 >SarsCov2Spike_Specifiedy_by_Mizuno-san
 humanProteinID =  61187 , srsCov2ProteinID =  0
NVVIK
LMDLE
LDPLS
PSKPS
ITGRL
common SCSs =  5
>XP_005254303.1 MAX gene-associated protein isoform X1 [Homo sapiens]
 >SarsCov2Spike_Specifiedy_by_Mizuno-san
 humanProteinID =  61188 , srsCov2ProteinID =  0
NVVIK
LMDLE
LDPLS
PSKPS
ITGRL
common SCSs =  5
>XP_005254304.1 MAX gene-associated protein isoform X1 [Homo sapiens]
 >SarsCov2Spike_Specifiedy_by_Mizuno-san
 humanProteinID =  61189 , srsCov2ProteinID =  0
NVVIK
LMDLE
LDPLS
PSKPS
ITGRL
common SCSs =  5
>XP_005254305.1 MAX gene-associated protein isoform X2 [Homo sapiens]
 >SarsCov2Spike_Specifiedy_by_Mizuno-san
 humanProteinID =  61190 , srsCov2ProteinID =  0
NVVIK
LMDLE
LDPLS
PSKPS
ITGRL
common SCSs =  5
>XP_005254310.1 MAX gene-associated protein isoform X7 [Homo sapiens]
 >SarsCov2Spike_Specifiedy_by_Mizuno-san
 humanProteinID =  61193 , srsCov2ProteinID =  0
NVVIK
LMDLE
LDPLS
PSKPS
ITGRL
common SCSs =  5
>XP_005258406.1 FH1/FH2 domain-containing protein 3 isoform X6 [Homo sapiens]
 >SarsCov2Spike_Specifiedy_by_Mizuno-san
 humanProteinID =  61974 , srsCov2ProteinID =  0
DSKVG
GLTVL
LTVLP
TVLPP
DVDLG
common SCSs =  5
>XP_005264507.2 baculoviral IAP repeat-containing protein 6 isoform X2 [Homo sapiens]
 >SarsCov2Spike_Specifiedy_by_Mizuno-san
 humanProteinID =  63142 , srsCov2ProteinID =  0
LTPGD
TLEIL
RRARS
GTITS
GAGAA
common SCSs =  5
>XP_005264508.2 baculoviral IAP repeat-containing protein 6 isoform X4 [Homo sapiens]
 >SarsCov2Spike_Specifiedy_by_Mizuno-san
 humanProteinID =  63143 , srsCov2ProteinID =  0
LTPGD
TLEIL
RRARS
GTITS
GAGAA
common SCSs =  5
>XP_005264509.2 baculoviral IAP repeat-containing protein 6 isoform X5 [Homo sapiens]
 >SarsCov2Spike_Specifiedy_by_Mizuno-san
 humanProteinID =  63144 , srsCov2ProteinID =  0
LTPGD
TLEIL
RRARS
GTITS
GAGAA
common SCSs =  5
>XP_005264510.2 baculoviral IAP repeat-containing protein 6 isoform X7 [Homo sapiens]
 >SarsCov2Spike_Specifiedy_by_Mizuno-san
 humanProteinID =  63145 , srsCov2ProteinID =  0
LTPGD
TLEIL
RRARS
GTITS
GAGAA
common SCSs =  5
>XP_005264511.2 baculoviral IAP repeat-containing protein 6 isoform X11 [Homo sapiens]
 >SarsCov2Spike_Specifiedy_by_Mizuno-san
 humanProteinID =  63146 , srsCov2ProteinID =  0
LTPGD
TLEIL
RRARS
GTITS
GAGAA
common SCSs =  5
>XP_005264512.2 baculoviral IAP repeat-containing protein 6 isoform X12 [Homo sapiens]
 >SarsCov2Spike_Specifiedy_by_Mizuno-san
 humanProteinID =  63147 , srsCov2ProteinID =  0
LTPGD
TLEIL
RRARS
GTITS
GAGAA
common SCSs =  5
>XP_005265358.1 histone-lysine N-methyltransferase SETD5 isoform X10 [Homo sapiens]
 >SarsCov2Spike_Specifiedy_by_Mizuno-san
 humanProteinID =  63310 , srsCov2ProteinID =  0
STGSN
SIAIP
GDIAA
AARDL
SLSST
common SCSs =  5
>XP_005265655.1 sodium bicarbonate cotransporter 3 isoform X6 [Homo sapiens]
 >SarsCov2Spike_Specifiedy_by_Mizuno-san
 humanProteinID =  63378 , srsCov2ProteinID =  0
DLCFT
TEVPV
LTGIA
TVLPP
PQSAP
common SCSs =  5
>XP_005265657.1 sodium bicarbonate cotransporter 3 isoform X9 [Homo sapiens]
 >SarsCov2Spike_Specifiedy_by_Mizuno-san
 humanProteinID =  63379 , srsCov2ProteinID =  0
DLCFT
TEVPV
LTGIA
TVLPP
PQSAP
common SCSs =  5
>XP_005266221.1 golgin subfamily A member 3 isoform X2 [Homo sapiens]
 >SarsCov2Spike_Specifiedy_by_Mizuno-san
 humanProteinID =  63482 , srsCov2ProteinID =  0
ESNKK
QDSLS
DSLSS
LQSLQ
KEELD
common SCSs =  5
>XP_005266224.1 golgin subfamily A member 3 isoform X4 [Homo sapiens]
 >SarsCov2Spike_Specifiedy_by_Mizuno-san
 humanProteinID =  63483 , srsCov2ProteinID =  0
ESNKK
QDSLS
DSLSS
LQSLQ
KEELD
common SCSs =  5
>XP_005267477.1 pecanex-like protein 1 isoform X1 [Homo sapiens]
 >SarsCov2Spike_Specifiedy_by_Mizuno-san
 humanProteinID =  63734 , srsCov2ProteinID =  0
AIHVS
TLLAL
DPLSE
SVASQ
VASQS
common SCSs =  5
>XP_005267478.1 pecanex-like protein 1 isoform X2 [Homo sapiens]
 >SarsCov2Spike_Specifiedy_by_Mizuno-san
 humanProteinID =  63735 , srsCov2ProteinID =  0
AIHVS
TLLAL
DPLSE
SVASQ
VASQS
common SCSs =  5
>XP_005267479.1 pecanex-like protein 1 isoform X3 [Homo sapiens]
 >SarsCov2Spike_Specifiedy_by_Mizuno-san
 humanProteinID =  63736 , srsCov2ProteinID =  0
AIHVS
TLLAL
DPLSE
SVASQ
VASQS
common SCSs =  5
>XP_005267480.1 pecanex-like protein 1 isoform X4 [Homo sapiens]
 >SarsCov2Spike_Specifiedy_by_Mizuno-san
 humanProteinID =  63737 , srsCov2ProteinID =  0
AIHVS
TLLAL
DPLSE
SVASQ
VASQS
common SCSs =  5
>XP_005267481.2 pecanex-like protein 1 isoform X5 [Homo sapiens]
 >SarsCov2Spike_Specifiedy_by_Mizuno-san
 humanProteinID =  63738 , srsCov2ProteinID =  0
AIHVS
TLLAL
DPLSE
SVASQ
VASQS
common SCSs =  5
>XP_005267482.1 pecanex-like protein 1 isoform X6 [Homo sapiens]
 >SarsCov2Spike_Specifiedy_by_Mizuno-san
 humanProteinID =  63739 , srsCov2ProteinID =  0
AIHVS
TLLAL
DPLSE
SVASQ
VASQS
common SCSs =  5
>XP_005270061.1 WD repeat- and FYVE domain-containing protein 4 isoform X3 [Homo sapiens]
 >SarsCov2Spike_Specifiedy_by_Mizuno-san
 humanProteinID =  64264 , srsCov2ProteinID =  0
STQDL
QSLLI
CNGVE
EDDSE
DDSEP
common SCSs =  5
>XP_005273431.1 rho GTPase-activating protein 7 isoform X1 [Homo sapiens]
 >SarsCov2Spike_Specifiedy_by_Mizuno-san
 humanProteinID =  64856 , srsCov2ProteinID =  0
LDSKV
LFRKS
TEIYQ
SLSST
NLAAT
common SCSs =  5
>XP_006711301.1 protein PRRC2C isoform X5 [Homo sapiens]
 >SarsCov2Spike_Specifiedy_by_Mizuno-san
 humanProteinID =  65455 , srsCov2ProteinID =  0
VSQPF
APATV
VLNDI
LGDIS
GDISG
common SCSs =  5
>XP_006711871.1 ryanodine receptor 2 isoform X8 [Homo sapiens]
 >SarsCov2Spike_Specifiedy_by_Mizuno-san
 humanProteinID =  65602 , srsCov2ProteinID =  0
VYSSA
VDLPI
TLLAL
LLLQY
QQLIR
common SCSs =  5
>XP_006712117.1 baculoviral IAP repeat-containing protein 6 isoform X3 [Homo sapiens]
 >SarsCov2Spike_Specifiedy_by_Mizuno-san
 humanProteinID =  65680 , srsCov2ProteinID =  0
LTPGD
TLEIL
RRARS
GTITS
GAGAA
common SCSs =  5
>XP_006712118.1 baculoviral IAP repeat-containing protein 6 isoform X6 [Homo sapiens]
 >SarsCov2Spike_Specifiedy_by_Mizuno-san
 humanProteinID =  65681 , srsCov2ProteinID =  0
LTPGD
TLEIL
RRARS
GTITS
GAGAA
common SCSs =  5
>XP_006712119.1 baculoviral IAP repeat-containing protein 6 isoform X9 [Homo sapiens]
 >SarsCov2Spike_Specifiedy_by_Mizuno-san
 humanProteinID =  65682 , srsCov2ProteinID =  0
LTPGD
TLEIL
RRARS
GTITS
GAGAA
common SCSs =  5
>XP_006712126.1 thyroid adenoma-associated protein isoform X1 [Homo sapiens]
 >SarsCov2Spike_Specifiedy_by_Mizuno-san
 humanProteinID =  65683 , srsCov2ProteinID =  0
RFQTL
TLKSF
NASVV
ASVVN
SVVNI
common SCSs =  5
>XP_006712873.1 protein TANC1 isoform X8 [Homo sapiens]
 >SarsCov2Spike_Specifiedy_by_Mizuno-san
 humanProteinID =  65897 , srsCov2ProteinID =  0
TRAGC
KRSFI
RSFIE
SSTAS
FPREG
common SCSs =  5
>XP_006712875.1 protein TANC1 isoform X12 [Homo sapiens]
 >SarsCov2Spike_Specifiedy_by_Mizuno-san
 humanProteinID =  65898 , srsCov2ProteinID =  0
TRAGC
KRSFI
RSFIE
SSTAS
FPREG
common SCSs =  5
>XP_006713001.1 neural cell adhesion molecule L1-like protein isoform X1 [Homo sapiens]
 >SarsCov2Spike_Specifiedy_by_Mizuno-san
 humanProteinID =  65932 , srsCov2ProteinID =  0
QPTES
VYSTG
YSTGS
STGSN
PSKPS
common SCSs =  5
>XP_006713002.1 neural cell adhesion molecule L1-like protein isoform X1 [Homo sapiens]
 >SarsCov2Spike_Specifiedy_by_Mizuno-san
 humanProteinID =  65933 , srsCov2ProteinID =  0
QPTES
VYSTG
YSTGS
STGSN
PSKPS
common SCSs =  5
>XP_006713003.1 neural cell adhesion molecule L1-like protein isoform X1 [Homo sapiens]
 >SarsCov2Spike_Specifiedy_by_Mizuno-san
 humanProteinID =  65934 , srsCov2ProteinID =  0
QPTES
VYSTG
YSTGS
STGSN
PSKPS
common SCSs =  5
>XP_006713484.1 sodium bicarbonate cotransporter 3 isoform X1 [Homo sapiens]
 >SarsCov2Spike_Specifiedy_by_Mizuno-san
 humanProteinID =  66079 , srsCov2ProteinID =  0
DLCFT
TEVPV
LTGIA
TVLPP
PQSAP
common SCSs =  5
>XP_006716949.1 multiple PDZ domain protein isoform X1 [Homo sapiens]
 >SarsCov2Spike_Specifiedy_by_Mizuno-san
 humanProteinID =  66989 , srsCov2ProteinID =  0
TISVT
FSQIL
QDVVN
TYVPA
GVFVS
common SCSs =  5
>XP_006716950.1 multiple PDZ domain protein isoform X1 [Homo sapiens]
 >SarsCov2Spike_Specifiedy_by_Mizuno-san
 humanProteinID =  66990 , srsCov2ProteinID =  0
TISVT
FSQIL
QDVVN
TYVPA
GVFVS
common SCSs =  5
>XP_006716951.1 multiple PDZ domain protein isoform X3 [Homo sapiens]
 >SarsCov2Spike_Specifiedy_by_Mizuno-san
 humanProteinID =  66991 , srsCov2ProteinID =  0
TISVT
FSQIL
QDVVN
TYVPA
GVFVS
common SCSs =  5
>XP_006719162.1 retroelement silencing factor 1 isoform X2 [Homo sapiens]
 >SarsCov2Spike_Specifiedy_by_Mizuno-san
 humanProteinID =  67584 , srsCov2ProteinID =  0
TEKSN
GINIT
TSNQV
GVTQN
VTQNV
common SCSs =  5
>XP_006719588.1 nck-associated protein 5-like isoform X1 [Homo sapiens]
 >SarsCov2Spike_Specifiedy_by_Mizuno-san
 humanProteinID =  67705 , srsCov2ProteinID =  0
RVYSS
SPTKL
DSLSS
SLSST
ALGKL
common SCSs =  5
>XP_006719677.1 histone-lysine N-methyltransferase 2D isoform X6 [Homo sapiens]
 >SarsCov2Spike_Specifiedy_by_Mizuno-san
 humanProteinID =  67736 , srsCov2ProteinID =  0
QVAVL
IEDLL
PPLLT
AKNLN
LQELG
common SCSs =  5
>XP_006719679.1 histone-lysine N-methyltransferase 2D isoform X8 [Homo sapiens]
 >SarsCov2Spike_Specifiedy_by_Mizuno-san
 humanProteinID =  67737 , srsCov2ProteinID =  0
QVAVL
IEDLL
PPLLT
AKNLN
LQELG
common SCSs =  5
>XP_006719799.1 golgin subfamily A member 3 isoform X1 [Homo sapiens]
 >SarsCov2Spike_Specifiedy_by_Mizuno-san
 humanProteinID =  67770 , srsCov2ProteinID =  0
ESNKK
QDSLS
DSLSS
LQSLQ
KEELD
common SCSs =  5
>XP_006719800.1 golgin subfamily A member 3 isoform X1 [Homo sapiens]
 >SarsCov2Spike_Specifiedy_by_Mizuno-san
 humanProteinID =  67771 , srsCov2ProteinID =  0
ESNKK
QDSLS
DSLSS
LQSLQ
KEELD
common SCSs =  5
>XP_006719842.1 E3 ubiquitin-protein ligase MYCBP2 isoform X1 [Homo sapiens]
 >SarsCov2Spike_Specifiedy_by_Mizuno-san
 humanProteinID =  67780 , srsCov2ProteinID =  0
NGTIT
LTVLP
TASAL
ASALG
RLDKV
common SCSs =  5
>XP_006719843.1 E3 ubiquitin-protein ligase MYCBP2 isoform X2 [Homo sapiens]
 >SarsCov2Spike_Specifiedy_by_Mizuno-san
 humanProteinID =  67781 , srsCov2ProteinID =  0
NGTIT
LTVLP
TASAL
ASALG
RLDKV
common SCSs =  5
>XP_006719845.1 E3 ubiquitin-protein ligase MYCBP2 isoform X5 [Homo sapiens]
 >SarsCov2Spike_Specifiedy_by_Mizuno-san
 humanProteinID =  67783 , srsCov2ProteinID =  0
NGTIT
LTVLP
TASAL
ASALG
RLDKV
common SCSs =  5
>XP_006719846.1 E3 ubiquitin-protein ligase MYCBP2 isoform X6 [Homo sapiens]
 >SarsCov2Spike_Specifiedy_by_Mizuno-san
 humanProteinID =  67784 , srsCov2ProteinID =  0
NGTIT
LTVLP
TASAL
ASALG
RLDKV
common SCSs =  5
>XP_006719847.1 E3 ubiquitin-protein ligase MYCBP2 isoform X7 [Homo sapiens]
 >SarsCov2Spike_Specifiedy_by_Mizuno-san
 humanProteinID =  67785 , srsCov2ProteinID =  0
NGTIT
LTVLP
TASAL
ASALG
RLDKV
common SCSs =  5
>XP_006719850.1 E3 ubiquitin-protein ligase MYCBP2 isoform X15 [Homo sapiens]
 >SarsCov2Spike_Specifiedy_by_Mizuno-san
 humanProteinID =  67788 , srsCov2ProteinID =  0
NGTIT
LTVLP
TASAL
ASALG
RLDKV
common SCSs =  5
>XP_006720145.1 pecanex-like protein 1 isoform X10 [Homo sapiens]
 >SarsCov2Spike_Specifiedy_by_Mizuno-san
 humanProteinID =  67865 , srsCov2ProteinID =  0
AIHVS
TLLAL
DPLSE
SVASQ
VASQS
common SCSs =  5
>XP_006720506.1 MAX gene-associated protein isoform X1 [Homo sapiens]
 >SarsCov2Spike_Specifiedy_by_Mizuno-san
 humanProteinID =  67972 , srsCov2ProteinID =  0
NVVIK
LMDLE
LDPLS
PSKPS
ITGRL
common SCSs =  5
>XP_011509314.1 protein unc-80 homolog isoform X19 [Homo sapiens]
 >SarsCov2Spike_Specifiedy_by_Mizuno-san
 humanProteinID =  70138 , srsCov2ProteinID =  0
EPLVD
PLVDL
AGAAA
RRARS
LPDPS
common SCSs =  5
>XP_011510350.1 protein TANC1 isoform X2 [Homo sapiens]
 >SarsCov2Spike_Specifiedy_by_Mizuno-san
 humanProteinID =  70631 , srsCov2ProteinID =  0
TRAGC
KRSFI
RSFIE
SSTAS
FPREG
common SCSs =  5
>XP_011510353.1 protein TANC1 isoform X5 [Homo sapiens]
 >SarsCov2Spike_Specifiedy_by_Mizuno-san
 humanProteinID =  70632 , srsCov2ProteinID =  0
TRAGC
KRSFI
RSFIE
SSTAS
FPREG
common SCSs =  5
>XP_011510355.1 protein TANC1 isoform X5 [Homo sapiens]
 >SarsCov2Spike_Specifiedy_by_Mizuno-san
 humanProteinID =  70633 , srsCov2ProteinID =  0
TRAGC
KRSFI
RSFIE
SSTAS
FPREG
common SCSs =  5
>XP_011510357.1 protein TANC1 isoform X10 [Homo sapiens]
 >SarsCov2Spike_Specifiedy_by_Mizuno-san
 humanProteinID =  70634 , srsCov2ProteinID =  0
TRAGC
KRSFI
RSFIE
SSTAS
FPREG
common SCSs =  5
>XP_011510361.1 protein TANC1 isoform X19 [Homo sapiens]
 >SarsCov2Spike_Specifiedy_by_Mizuno-san
 humanProteinID =  70636 , srsCov2ProteinID =  0
TRAGC
KRSFI
RSFIE
SSTAS
FPREG
common SCSs =  5
>XP_011512982.1 fibrocystin isoform X1 [Homo sapiens]
 >SarsCov2Spike_Specifiedy_by_Mizuno-san
 humanProteinID =  71858 , srsCov2ProteinID =  0
QDLFL
VIRGD
GSTPC
KLQDV
ITGRL
common SCSs =  5
>XP_011512984.1 fibrocystin isoform X3 [Homo sapiens]
 >SarsCov2Spike_Specifiedy_by_Mizuno-san
 humanProteinID =  71859 , srsCov2ProteinID =  0
QDLFL
VIRGD
GSTPC
KLQDV
ITGRL
common SCSs =  5
>XP_011512985.1 fibrocystin isoform X6 [Homo sapiens]
 >SarsCov2Spike_Specifiedy_by_Mizuno-san
 humanProteinID =  71860 , srsCov2ProteinID =  0
QDLFL
VIRGD
GSTPC
KLQDV
ITGRL
common SCSs =  5
>XP_011512987.1 fibrocystin isoform X9 [Homo sapiens]
 >SarsCov2Spike_Specifiedy_by_Mizuno-san
 humanProteinID =  71862 , srsCov2ProteinID =  0
QDLFL
VIRGD
GSTPC
KLQDV
ITGRL
common SCSs =  5
>XP_011512988.1 fibrocystin isoform X11 [Homo sapiens]
 >SarsCov2Spike_Specifiedy_by_Mizuno-san
 humanProteinID =  71863 , srsCov2ProteinID =  0
QDLFL
VIRGD
GSTPC
KLQDV
ITGRL
common SCSs =  5
>XP_011512989.1 fibrocystin isoform X12 [Homo sapiens]
 >SarsCov2Spike_Specifiedy_by_Mizuno-san
 humanProteinID =  71864 , srsCov2ProteinID =  0
QDLFL
VIRGD
GSTPC
KLQDV
ITGRL
common SCSs =  5
>XP_011513328.1 dyslexia-associated protein KIAA0319 isoform X7 [Homo sapiens]
 >SarsCov2Spike_Specifiedy_by_Mizuno-san
 humanProteinID =  72041 , srsCov2ProteinID =  0
VLLPL
LIVNN
IVNNA
RSYLT
KTSVD
common SCSs =  5
>XP_011513432.1 ATP-binding cassette sub-family A member 13 isoform X1 [Homo sapiens]
 >SarsCov2Spike_Specifiedy_by_Mizuno-san
 humanProteinID =  72099 , srsCov2ProteinID =  0
YLQPR
LEILD
FNFSQ
SALLA
NLAAT
common SCSs =  5
>XP_011513433.1 ATP-binding cassette sub-family A member 13 isoform X2 [Homo sapiens]
 >SarsCov2Spike_Specifiedy_by_Mizuno-san
 humanProteinID =  72100 , srsCov2ProteinID =  0
YLQPR
LEILD
FNFSQ
SALLA
NLAAT
common SCSs =  5
>XP_011513434.1 ATP-binding cassette sub-family A member 13 isoform X3 [Homo sapiens]
 >SarsCov2Spike_Specifiedy_by_Mizuno-san
 humanProteinID =  72101 , srsCov2ProteinID =  0
YLQPR
LEILD
FNFSQ
SALLA
NLAAT
common SCSs =  5
>XP_011513435.1 ATP-binding cassette sub-family A member 13 isoform X4 [Homo sapiens]
 >SarsCov2Spike_Specifiedy_by_Mizuno-san
 humanProteinID =  72102 , srsCov2ProteinID =  0
YLQPR
LEILD
FNFSQ
SALLA
NLAAT
common SCSs =  5
>XP_011513436.1 ATP-binding cassette sub-family A member 13 isoform X5 [Homo sapiens]
 >SarsCov2Spike_Specifiedy_by_Mizuno-san
 humanProteinID =  72103 , srsCov2ProteinID =  0
YLQPR
LEILD
FNFSQ
SALLA
NLAAT
common SCSs =  5
>XP_011513439.1 ATP-binding cassette sub-family A member 13 isoform X7 [Homo sapiens]
 >SarsCov2Spike_Specifiedy_by_Mizuno-san
 humanProteinID =  72105 , srsCov2ProteinID =  0
YLQPR
LEILD
FNFSQ
SALLA
NLAAT
common SCSs =  5
>XP_011515638.1 protein mono-ADP-ribosyltransferase PARP10 isoform X1 [Homo sapiens]
 >SarsCov2Spike_Specifiedy_by_Mizuno-san
 humanProteinID =  73093 , srsCov2ProteinID =  0
GVYFA
LALHR
ALHRS
ALLAG
TTAPA
common SCSs =  5
>XP_011519408.1 coiled-coil domain-containing protein 168 isoform X1 [Homo sapiens]
 >SarsCov2Spike_Specifiedy_by_Mizuno-san
 humanProteinID =  74851 , srsCov2ProteinID =  0
LSETK
FPLQS
LTESN
KIQDS
DSLSS
common SCSs =  5
>XP_011519699.1 MAX gene-associated protein isoform X4 [Homo sapiens]
 >SarsCov2Spike_Specifiedy_by_Mizuno-san
 humanProteinID =  74996 , srsCov2ProteinID =  0
NVVIK
LMDLE
LDPLS
PSKPS
ITGRL
common SCSs =  5
>XP_011519700.1 MAX gene-associated protein isoform X5 [Homo sapiens]
 >SarsCov2Spike_Specifiedy_by_Mizuno-san
 humanProteinID =  74997 , srsCov2ProteinID =  0
NVVIK
LMDLE
LDPLS
PSKPS
ITGRL
common SCSs =  5
>XP_011520287.1 TP53-binding protein 1 isoform X1 [Homo sapiens]
 >SarsCov2Spike_Specifiedy_by_Mizuno-san
 humanProteinID =  75289 , srsCov2ProteinID =  0
SLGAE
QDSLS
KQLSS
DLGDI
LGDIS
common SCSs =  5
>XP_011520288.1 TP53-binding protein 1 isoform X2 [Homo sapiens]
 >SarsCov2Spike_Specifiedy_by_Mizuno-san
 humanProteinID =  75290 , srsCov2ProteinID =  0
SLGAE
QDSLS
KQLSS
DLGDI
LGDIS
common SCSs =  5
>XP_011522931.1 KAT8 regulatory NSL complex subunit 1 isoform X3 [Homo sapiens]
 >SarsCov2Spike_Specifiedy_by_Mizuno-san
 humanProteinID =  76570 , srsCov2ProteinID =  0
NGTKR
PGDSS
DSSSG
YSNNS
LGKLQ
common SCSs =  5
>XP_011523718.1 dynein heavy chain 17, axonemal isoform X1 [Homo sapiens]
 >SarsCov2Spike_Specifiedy_by_Mizuno-san
 humanProteinID =  76973 , srsCov2ProteinID =  0
RTQLP
LDPLS
KKFLP
YSTGS
LIGAE
common SCSs =  5
>XP_011523944.1 structural maintenance of chromosomes flexible hinge domain-containing protein 1 isoform X1 [Homo sapiens]
 >SarsCov2Spike_Specifiedy_by_Mizuno-san
 humanProteinID =  77056 , srsCov2ProteinID =  0
LVRDL
SIVRF
DLCFT
RSVAS
ILPDP
common SCSs =  5
>XP_011523945.1 structural maintenance of chromosomes flexible hinge domain-containing protein 1 isoform X2 [Homo sapiens]
 >SarsCov2Spike_Specifiedy_by_Mizuno-san
 humanProteinID =  77057 , srsCov2ProteinID =  0
LVRDL
SIVRF
DLCFT
RSVAS
ILPDP
common SCSs =  5
>XP_011524491.1 FH1/FH2 domain-containing protein 3 isoform X1 [Homo sapiens]
 >SarsCov2Spike_Specifiedy_by_Mizuno-san
 humanProteinID =  77293 , srsCov2ProteinID =  0
DSKVG
GLTVL
LTVLP
TVLPP
DVDLG
common SCSs =  5
>XP_011524492.1 FH1/FH2 domain-containing protein 3 isoform X2 [Homo sapiens]
 >SarsCov2Spike_Specifiedy_by_Mizuno-san
 humanProteinID =  77294 , srsCov2ProteinID =  0
DSKVG
GLTVL
LTVLP
TVLPP
DVDLG
common SCSs =  5
>XP_011524494.1 FH1/FH2 domain-containing protein 3 isoform X3 [Homo sapiens]
 >SarsCov2Spike_Specifiedy_by_Mizuno-san
 humanProteinID =  77295 , srsCov2ProteinID =  0
DSKVG
GLTVL
LTVLP
TVLPP
DVDLG
common SCSs =  5
>XP_011524495.1 FH1/FH2 domain-containing protein 3 isoform X4 [Homo sapiens]
 >SarsCov2Spike_Specifiedy_by_Mizuno-san
 humanProteinID =  77296 , srsCov2ProteinID =  0
DSKVG
GLTVL
LTVLP
TVLPP
DVDLG
common SCSs =  5
>XP_011524497.1 FH1/FH2 domain-containing protein 3 isoform X9 [Homo sapiens]
 >SarsCov2Spike_Specifiedy_by_Mizuno-san
 humanProteinID =  77297 , srsCov2ProteinID =  0
DSKVG
GLTVL
LTVLP
TVLPP
DVDLG
common SCSs =  5
>XP_011524499.1 FH1/FH2 domain-containing protein 3 isoform X16 [Homo sapiens]
 >SarsCov2Spike_Specifiedy_by_Mizuno-san
 humanProteinID =  77299 , srsCov2ProteinID =  0
DSKVG
GLTVL
LTVLP
TVLPP
DVDLG
common SCSs =  5
>XP_011531594.1 neural cell adhesion molecule L1-like protein isoform X1 [Homo sapiens]
 >SarsCov2Spike_Specifiedy_by_Mizuno-san
 humanProteinID =  80804 , srsCov2ProteinID =  0
QPTES
VYSTG
YSTGS
STGSN
PSKPS
common SCSs =  5
>XP_011531596.1 neural cell adhesion molecule L1-like protein isoform X2 [Homo sapiens]
 >SarsCov2Spike_Specifiedy_by_Mizuno-san
 humanProteinID =  80805 , srsCov2ProteinID =  0
QPTES
VYSTG
YSTGS
STGSN
PSKPS
common SCSs =  5
>XP_011531597.1 neural cell adhesion molecule L1-like protein isoform X2 [Homo sapiens]
 >SarsCov2Spike_Specifiedy_by_Mizuno-san
 humanProteinID =  80806 , srsCov2ProteinID =  0
QPTES
VYSTG
YSTGS
STGSN
PSKPS
common SCSs =  5
>XP_011531598.1 neural cell adhesion molecule L1-like protein isoform X3 [Homo sapiens]
 >SarsCov2Spike_Specifiedy_by_Mizuno-san
 humanProteinID =  80807 , srsCov2ProteinID =  0
QPTES
VYSTG
YSTGS
STGSN
PSKPS
common SCSs =  5
>XP_011532224.1 histone-lysine N-methyltransferase SETD5 isoform X2 [Homo sapiens]
 >SarsCov2Spike_Specifiedy_by_Mizuno-san
 humanProteinID =  81083 , srsCov2ProteinID =  0
STGSN
SIAIP
GDIAA
AARDL
SLSST
common SCSs =  5
>XP_011532230.1 histone-lysine N-methyltransferase SETD5 isoform X7 [Homo sapiens]
 >SarsCov2Spike_Specifiedy_by_Mizuno-san
 humanProteinID =  81085 , srsCov2ProteinID =  0
STGSN
SIAIP
GDIAA
AARDL
SLSST
common SCSs =  5
>XP_011532558.1 sodium bicarbonate cotransporter 3 isoform X2 [Homo sapiens]
 >SarsCov2Spike_Specifiedy_by_Mizuno-san
 humanProteinID =  81261 , srsCov2ProteinID =  0
DLCFT
TEVPV
LTGIA
TVLPP
PQSAP
common SCSs =  5
>XP_011532560.1 sodium bicarbonate cotransporter 3 isoform X3 [Homo sapiens]
 >SarsCov2Spike_Specifiedy_by_Mizuno-san
 humanProteinID =  81262 , srsCov2ProteinID =  0
DLCFT
TEVPV
LTGIA
TVLPP
PQSAP
common SCSs =  5
>XP_011532563.1 sodium bicarbonate cotransporter 3 isoform X4 [Homo sapiens]
 >SarsCov2Spike_Specifiedy_by_Mizuno-san
 humanProteinID =  81263 , srsCov2ProteinID =  0
DLCFT
TEVPV
LTGIA
TVLPP
PQSAP
common SCSs =  5
>XP_011532565.1 sodium bicarbonate cotransporter 3 isoform X7 [Homo sapiens]
 >SarsCov2Spike_Specifiedy_by_Mizuno-san
 humanProteinID =  81264 , srsCov2ProteinID =  0
DLCFT
TEVPV
LTGIA
TVLPP
PQSAP
common SCSs =  5
>XP_011532567.1 sodium bicarbonate cotransporter 3 isoform X10 [Homo sapiens]
 >SarsCov2Spike_Specifiedy_by_Mizuno-san
 humanProteinID =  81265 , srsCov2ProteinID =  0
DLCFT
TEVPV
LTGIA
TVLPP
PQSAP
common SCSs =  5
>XP_011533095.1 golgin subfamily A member 3 isoform X3 [Homo sapiens]
 >SarsCov2Spike_Specifiedy_by_Mizuno-san
 humanProteinID =  81480 , srsCov2ProteinID =  0
ESNKK
QDSLS
DSLSS
LQSLQ
KEELD
common SCSs =  5
>XP_011533306.1 E3 ubiquitin-protein ligase MYCBP2 isoform X17 [Homo sapiens]
 >SarsCov2Spike_Specifiedy_by_Mizuno-san
 humanProteinID =  81595 , srsCov2ProteinID =  0
NGTIT
LTVLP
TASAL
ASALG
RLDKV
common SCSs =  5
>XP_011533307.1 E3 ubiquitin-protein ligase MYCBP2 isoform X28 [Homo sapiens]
 >SarsCov2Spike_Specifiedy_by_Mizuno-san
 humanProteinID =  81596 , srsCov2ProteinID =  0
NGTIT
LTVLP
TASAL
ASALG
RLDKV
common SCSs =  5
>XP_011534330.1 DNA polymerase zeta catalytic subunit isoform X1 [Homo sapiens]
 >SarsCov2Spike_Specifiedy_by_Mizuno-san
 humanProteinID =  82062 , srsCov2ProteinID =  0
DSSSG
EILPV
ILPVS
KLIAN
SLSST
common SCSs =  5
>XP_011534331.1 DNA polymerase zeta catalytic subunit isoform X2 [Homo sapiens]
 >SarsCov2Spike_Specifiedy_by_Mizuno-san
 humanProteinID =  82063 , srsCov2ProteinID =  0
DSSSG
EILPV
ILPVS
KLIAN
SLSST
common SCSs =  5
>XP_011534332.1 DNA polymerase zeta catalytic subunit isoform X3 [Homo sapiens]
 >SarsCov2Spike_Specifiedy_by_Mizuno-san
 humanProteinID =  82064 , srsCov2ProteinID =  0
DSSSG
EILPV
ILPVS
KLIAN
SLSST
common SCSs =  5
>XP_011534333.1 DNA polymerase zeta catalytic subunit isoform X4 [Homo sapiens]
 >SarsCov2Spike_Specifiedy_by_Mizuno-san
 humanProteinID =  82065 , srsCov2ProteinID =  0
DSSSG
EILPV
ILPVS
KLIAN
SLSST
common SCSs =  5
>XP_011534334.1 DNA polymerase zeta catalytic subunit isoform X4 [Homo sapiens]
 >SarsCov2Spike_Specifiedy_by_Mizuno-san
 humanProteinID =  82066 , srsCov2ProteinID =  0
DSSSG
EILPV
ILPVS
KLIAN
SLSST
common SCSs =  5
>XP_011536913.1 nck-associated protein 5-like isoform X1 [Homo sapiens]
 >SarsCov2Spike_Specifiedy_by_Mizuno-san
 humanProteinID =  83285 , srsCov2ProteinID =  0
RVYSS
SPTKL
DSLSS
SLSST
ALGKL
common SCSs =  5
>XP_011537072.1 histone-lysine N-methyltransferase 2D isoform X1 [Homo sapiens]
 >SarsCov2Spike_Specifiedy_by_Mizuno-san
 humanProteinID =  83375 , srsCov2ProteinID =  0
QVAVL
IEDLL
PPLLT
AKNLN
LQELG
common SCSs =  5
>XP_011537073.1 histone-lysine N-methyltransferase 2D isoform X2 [Homo sapiens]
 >SarsCov2Spike_Specifiedy_by_Mizuno-san
 humanProteinID =  83376 , srsCov2ProteinID =  0
QVAVL
IEDLL
PPLLT
AKNLN
LQELG
common SCSs =  5
>XP_011537074.1 histone-lysine N-methyltransferase 2D isoform X3 [Homo sapiens]
 >SarsCov2Spike_Specifiedy_by_Mizuno-san
 humanProteinID =  83377 , srsCov2ProteinID =  0
QVAVL
IEDLL
PPLLT
AKNLN
LQELG
common SCSs =  5
>XP_011537075.1 histone-lysine N-methyltransferase 2D isoform X4 [Homo sapiens]
 >SarsCov2Spike_Specifiedy_by_Mizuno-san
 humanProteinID =  83378 , srsCov2ProteinID =  0
QVAVL
IEDLL
PPLLT
AKNLN
LQELG
common SCSs =  5
>XP_011537076.1 histone-lysine N-methyltransferase 2D isoform X5 [Homo sapiens]
 >SarsCov2Spike_Specifiedy_by_Mizuno-san
 humanProteinID =  83379 , srsCov2ProteinID =  0
QVAVL
IEDLL
PPLLT
AKNLN
LQELG
common SCSs =  5
>XP_011537078.1 histone-lysine N-methyltransferase 2D isoform X9 [Homo sapiens]
 >SarsCov2Spike_Specifiedy_by_Mizuno-san
 humanProteinID =  83380 , srsCov2ProteinID =  0
QVAVL
IEDLL
PPLLT
AKNLN
LQELG
common SCSs =  5
>XP_011538288.2 WD repeat- and FYVE domain-containing protein 4 isoform X1 [Homo sapiens]
 >SarsCov2Spike_Specifiedy_by_Mizuno-san
 humanProteinID =  83903 , srsCov2ProteinID =  0
STQDL
QSLLI
CNGVE
EDDSE
DDSEP
common SCSs =  5
>XP_011538289.2 WD repeat- and FYVE domain-containing protein 4 isoform X2 [Homo sapiens]
 >SarsCov2Spike_Specifiedy_by_Mizuno-san
 humanProteinID =  83904 , srsCov2ProteinID =  0
STQDL
QSLLI
CNGVE
EDDSE
DDSEP
common SCSs =  5
>XP_011538290.1 WD repeat- and FYVE domain-containing protein 4 isoform X3 [Homo sapiens]
 >SarsCov2Spike_Specifiedy_by_Mizuno-san
 humanProteinID =  83905 , srsCov2ProteinID =  0
STQDL
QSLLI
CNGVE
EDDSE
DDSEP
common SCSs =  5
>XP_011539416.2 E3 ubiquitin-protein ligase UBR4 isoform X7 [Homo sapiens]
 >SarsCov2Spike_Specifiedy_by_Mizuno-san
 humanProteinID =  84445 , srsCov2ProteinID =  0
GGVSV
ALLAG
DILSR
LQELG
DDSEP
common SCSs =  5
>XP_011539417.2 E3 ubiquitin-protein ligase UBR4 isoform X9 [Homo sapiens]
 >SarsCov2Spike_Specifiedy_by_Mizuno-san
 humanProteinID =  84446 , srsCov2ProteinID =  0
GGVSV
ALLAG
DILSR
LQELG
DDSEP
common SCSs =  5
>XP_011539422.2 E3 ubiquitin-protein ligase UBR4 isoform X18 [Homo sapiens]
 >SarsCov2Spike_Specifiedy_by_Mizuno-san
 humanProteinID =  84451 , srsCov2ProteinID =  0
GGVSV
ALLAG
DILSR
LQELG
DDSEP
common SCSs =  5
>XP_011539423.2 E3 ubiquitin-protein ligase UBR4 isoform X20 [Homo sapiens]
 >SarsCov2Spike_Specifiedy_by_Mizuno-san
 humanProteinID =  84452 , srsCov2ProteinID =  0
GGVSV
ALLAG
DILSR
LQELG
DDSEP
common SCSs =  5
>XP_011541131.1 histone-lysine N-methyltransferase 2A isoform X1 [Homo sapiens]
 >SarsCov2Spike_Specifiedy_by_Mizuno-san
 humanProteinID =  85162 , srsCov2ProteinID =  0
QVAVL
VNCTE
PPLLT
VVNQN
SSVLN
common SCSs =  5
>XP_011541132.1 histone-lysine N-methyltransferase 2A isoform X2 [Homo sapiens]
 >SarsCov2Spike_Specifiedy_by_Mizuno-san
 humanProteinID =  85163 , srsCov2ProteinID =  0
QVAVL
VNCTE
PPLLT
VVNQN
SSVLN
common SCSs =  5
>XP_011541133.1 histone-lysine N-methyltransferase 2A isoform X3 [Homo sapiens]
 >SarsCov2Spike_Specifiedy_by_Mizuno-san
 humanProteinID =  85164 , srsCov2ProteinID =  0
QVAVL
VNCTE
PPLLT
VVNQN
SSVLN
common SCSs =  5
>XP_011541156.1 protein NPAT isoform X1 [Homo sapiens]
 >SarsCov2Spike_Specifiedy_by_Mizuno-san
 humanProteinID =  85180 , srsCov2ProteinID =  0
EILPV
ILPVS
NFSQI
DSLSS
SLSST
common SCSs =  5
>XP_011543235.1 teneurin-4 isoform X3 [Homo sapiens]
 >SarsCov2Spike_Specifiedy_by_Mizuno-san
 humanProteinID =  86203 , srsCov2ProteinID =  0
GTTLD
RLFRK
VAIHA
LLAGT
QIITT
common SCSs =  5
>XP_016856249.1 protein PRRC2C isoform X6 [Homo sapiens]
 >SarsCov2Spike_Specifiedy_by_Mizuno-san
 humanProteinID =  87392 , srsCov2ProteinID =  0
VSQPF
APATV
VLNDI
LGDIS
GDISG
common SCSs =  5
>XP_016856250.1 protein PRRC2C isoform X9 [Homo sapiens]
 >SarsCov2Spike_Specifiedy_by_Mizuno-san
 humanProteinID =  87393 , srsCov2ProteinID =  0
VSQPF
APATV
VLNDI
LGDIS
GDISG
common SCSs =  5
>XP_016856251.1 protein PRRC2C isoform X12 [Homo sapiens]
 >SarsCov2Spike_Specifiedy_by_Mizuno-san
 humanProteinID =  87394 , srsCov2ProteinID =  0
VSQPF
APATV
VLNDI
LGDIS
GDISG
common SCSs =  5
>XP_016856311.2 E3 ubiquitin-protein ligase UBR4 isoform X8 [Homo sapiens]
 >SarsCov2Spike_Specifiedy_by_Mizuno-san
 humanProteinID =  87435 , srsCov2ProteinID =  0
GGVSV
ALLAG
DILSR
LQELG
DDSEP
common SCSs =  5
>XP_016856313.2 E3 ubiquitin-protein ligase UBR4 isoform X14 [Homo sapiens]
 >SarsCov2Spike_Specifiedy_by_Mizuno-san
 humanProteinID =  87437 , srsCov2ProteinID =  0
GGVSV
ALLAG
DILSR
LQELG
DDSEP
common SCSs =  5
>XP_016856315.2 E3 ubiquitin-protein ligase UBR4 isoform X16 [Homo sapiens]
 >SarsCov2Spike_Specifiedy_by_Mizuno-san
 humanProteinID =  87439 , srsCov2ProteinID =  0
GGVSV
ALLAG
DILSR
LQELG
DDSEP
common SCSs =  5
>XP_016856316.2 E3 ubiquitin-protein ligase UBR4 isoform X19 [Homo sapiens]
 >SarsCov2Spike_Specifiedy_by_Mizuno-san
 humanProteinID =  87440 , srsCov2ProteinID =  0
GGVSV
ALLAG
DILSR
LQELG
DDSEP
common SCSs =  5
>XP_016856317.2 E3 ubiquitin-protein ligase UBR4 isoform X21 [Homo sapiens]
 >SarsCov2Spike_Specifiedy_by_Mizuno-san
 humanProteinID =  87441 , srsCov2ProteinID =  0
GGVSV
ALLAG
DILSR
LQELG
DDSEP
common SCSs =  5
>XP_016856318.2 E3 ubiquitin-protein ligase UBR4 isoform X22 [Homo sapiens]
 >SarsCov2Spike_Specifiedy_by_Mizuno-san
 humanProteinID =  87442 , srsCov2ProteinID =  0
GGVSV
ALLAG
DILSR
LQELG
DDSEP
common SCSs =  5
>XP_016856319.2 E3 ubiquitin-protein ligase UBR4 isoform X23 [Homo sapiens]
 >SarsCov2Spike_Specifiedy_by_Mizuno-san
 humanProteinID =  87443 , srsCov2ProteinID =  0
GGVSV
ALLAG
DILSR
LQELG
DDSEP
common SCSs =  5
>XP_016856831.1 protein phosphatase 1 regulatory subunit 12B isoform X1 [Homo sapiens]
 >SarsCov2Spike_Specifiedy_by_Mizuno-san
 humanProteinID =  87845 , srsCov2ProteinID =  0
RSSVL
RSYLT
SYLTP
NRALT
ENQKL
common SCSs =  5
>XP_016856832.1 protein phosphatase 1 regulatory subunit 12B isoform X2 [Homo sapiens]
 >SarsCov2Spike_Specifiedy_by_Mizuno-san
 humanProteinID =  87846 , srsCov2ProteinID =  0
RSSVL
RSYLT
SYLTP
NRALT
ENQKL
common SCSs =  5
>XP_016856835.1 protein phosphatase 1 regulatory subunit 12B isoform X4 [Homo sapiens]
 >SarsCov2Spike_Specifiedy_by_Mizuno-san
 humanProteinID =  87848 , srsCov2ProteinID =  0
RSSVL
RSYLT
SYLTP
NRALT
ENQKL
common SCSs =  5
>XP_016856836.1 protein phosphatase 1 regulatory subunit 12B isoform X5 [Homo sapiens]
 >SarsCov2Spike_Specifiedy_by_Mizuno-san
 humanProteinID =  87849 , srsCov2ProteinID =  0
RSSVL
RSYLT
SYLTP
NRALT
ENQKL
common SCSs =  5
>XP_016859911.1 telomere-associated protein RIF1 isoform X2 [Homo sapiens]
 >SarsCov2Spike_Specifiedy_by_Mizuno-san
 humanProteinID =  89921 , srsCov2ProteinID =  0
NGTKR
IYQAG
QKLIA
ISSVL
QLIRA
common SCSs =  5
>XP_016859912.1 telomere-associated protein RIF1 isoform X3 [Homo sapiens]
 >SarsCov2Spike_Specifiedy_by_Mizuno-san
 humanProteinID =  89922 , srsCov2ProteinID =  0
NGTKR
IYQAG
QKLIA
ISSVL
QLIRA
common SCSs =  5
>XP_016859913.1 telomere-associated protein RIF1 isoform X4 [Homo sapiens]
 >SarsCov2Spike_Specifiedy_by_Mizuno-san
 humanProteinID =  89923 , srsCov2ProteinID =  0
NGTKR
IYQAG
QKLIA
ISSVL
QLIRA
common SCSs =  5
>XP_016859914.1 telomere-associated protein RIF1 isoform X5 [Homo sapiens]
 >SarsCov2Spike_Specifiedy_by_Mizuno-san
 humanProteinID =  89924 , srsCov2ProteinID =  0
NGTKR
IYQAG
QKLIA
ISSVL
QLIRA
common SCSs =  5
>XP_016860045.1 baculoviral IAP repeat-containing protein 6 isoform X8 [Homo sapiens]
 >SarsCov2Spike_Specifiedy_by_Mizuno-san
 humanProteinID =  90020 , srsCov2ProteinID =  0
LTPGD
TLEIL
RRARS
GTITS
GAGAA
common SCSs =  5
>XP_016860046.1 baculoviral IAP repeat-containing protein 6 isoform X10 [Homo sapiens]
 >SarsCov2Spike_Specifiedy_by_Mizuno-san
 humanProteinID =  90021 , srsCov2ProteinID =  0
LTPGD
TLEIL
RRARS
GTITS
GAGAA
common SCSs =  5
>XP_016860047.1 baculoviral IAP repeat-containing protein 6 isoform X13 [Homo sapiens]
 >SarsCov2Spike_Specifiedy_by_Mizuno-san
 humanProteinID =  90022 , srsCov2ProteinID =  0
LTPGD
TLEIL
RRARS
GTITS
GAGAA
common SCSs =  5
>XP_016860048.1 baculoviral IAP repeat-containing protein 6 isoform X15 [Homo sapiens]
 >SarsCov2Spike_Specifiedy_by_Mizuno-san
 humanProteinID =  90023 , srsCov2ProteinID =  0
LTPGD
TLEIL
RRARS
GTITS
GAGAA
common SCSs =  5
>XP_016860630.1 protein TANC1 isoform X1 [Homo sapiens]
 >SarsCov2Spike_Specifiedy_by_Mizuno-san
 humanProteinID =  90420 , srsCov2ProteinID =  0
TRAGC
KRSFI
RSFIE
SSTAS
FPREG
common SCSs =  5
>XP_016860631.1 protein TANC1 isoform X3 [Homo sapiens]
 >SarsCov2Spike_Specifiedy_by_Mizuno-san
 humanProteinID =  90421 , srsCov2ProteinID =  0
TRAGC
KRSFI
RSFIE
SSTAS
FPREG
common SCSs =  5
>XP_016860632.1 protein TANC1 isoform X3 [Homo sapiens]
 >SarsCov2Spike_Specifiedy_by_Mizuno-san
 humanProteinID =  90422 , srsCov2ProteinID =  0
TRAGC
KRSFI
RSFIE
SSTAS
FPREG
common SCSs =  5
>XP_016860633.1 protein TANC1 isoform X4 [Homo sapiens]
 >SarsCov2Spike_Specifiedy_by_Mizuno-san
 humanProteinID =  90423 , srsCov2ProteinID =  0
TRAGC
KRSFI
RSFIE
SSTAS
FPREG
common SCSs =  5
>XP_016860634.1 protein TANC1 isoform X5 [Homo sapiens]
 >SarsCov2Spike_Specifiedy_by_Mizuno-san
 humanProteinID =  90424 , srsCov2ProteinID =  0
TRAGC
KRSFI
RSFIE
SSTAS
FPREG
common SCSs =  5
>XP_016860635.1 protein TANC1 isoform X6 [Homo sapiens]
 >SarsCov2Spike_Specifiedy_by_Mizuno-san
 humanProteinID =  90425 , srsCov2ProteinID =  0
TRAGC
KRSFI
RSFIE
SSTAS
FPREG
common SCSs =  5
>XP_016860638.1 protein TANC1 isoform X9 [Homo sapiens]
 >SarsCov2Spike_Specifiedy_by_Mizuno-san
 humanProteinID =  90426 , srsCov2ProteinID =  0
TRAGC
KRSFI
RSFIE
SSTAS
FPREG
common SCSs =  5
>XP_016860639.1 protein TANC1 isoform X11 [Homo sapiens]
 >SarsCov2Spike_Specifiedy_by_Mizuno-san
 humanProteinID =  90427 , srsCov2ProteinID =  0
TRAGC
KRSFI
RSFIE
SSTAS
FPREG
common SCSs =  5
>XP_016860640.1 protein TANC1 isoform X13 [Homo sapiens]
 >SarsCov2Spike_Specifiedy_by_Mizuno-san
 humanProteinID =  90428 , srsCov2ProteinID =  0
TRAGC
KRSFI
RSFIE
SSTAS
FPREG
common SCSs =  5
>XP_016860641.1 protein TANC1 isoform X14 [Homo sapiens]
 >SarsCov2Spike_Specifiedy_by_Mizuno-san
 humanProteinID =  90429 , srsCov2ProteinID =  0
TRAGC
KRSFI
RSFIE
SSTAS
FPREG
common SCSs =  5
>XP_016860643.1 protein TANC1 isoform X16 [Homo sapiens]
 >SarsCov2Spike_Specifiedy_by_Mizuno-san
 humanProteinID =  90431 , srsCov2ProteinID =  0
TRAGC
KRSFI
RSFIE
SSTAS
FPREG
common SCSs =  5
>XP_016861055.1 neural cell adhesion molecule L1-like protein isoform X1 [Homo sapiens]
 >SarsCov2Spike_Specifiedy_by_Mizuno-san
 humanProteinID =  90662 , srsCov2ProteinID =  0
QPTES
VYSTG
YSTGS
STGSN
PSKPS
common SCSs =  5
>XP_016861056.1 neural cell adhesion molecule L1-like protein isoform X1 [Homo sapiens]
 >SarsCov2Spike_Specifiedy_by_Mizuno-san
 humanProteinID =  90663 , srsCov2ProteinID =  0
QPTES
VYSTG
YSTGS
STGSN
PSKPS
common SCSs =  5
>XP_016861057.1 neural cell adhesion molecule L1-like protein isoform X1 [Homo sapiens]
 >SarsCov2Spike_Specifiedy_by_Mizuno-san
 humanProteinID =  90664 , srsCov2ProteinID =  0
QPTES
VYSTG
YSTGS
STGSN
PSKPS
common SCSs =  5
>XP_016861058.1 neural cell adhesion molecule L1-like protein isoform X2 [Homo sapiens]
 >SarsCov2Spike_Specifiedy_by_Mizuno-san
 humanProteinID =  90665 , srsCov2ProteinID =  0
QPTES
VYSTG
YSTGS
STGSN
PSKPS
common SCSs =  5
>XP_016861059.1 neural cell adhesion molecule L1-like protein isoform X2 [Homo sapiens]
 >SarsCov2Spike_Specifiedy_by_Mizuno-san
 humanProteinID =  90666 , srsCov2ProteinID =  0
QPTES
VYSTG
YSTGS
STGSN
PSKPS
common SCSs =  5
>XP_016861060.1 neural cell adhesion molecule L1-like protein isoform X2 [Homo sapiens]
 >SarsCov2Spike_Specifiedy_by_Mizuno-san
 humanProteinID =  90667 , srsCov2ProteinID =  0
QPTES
VYSTG
YSTGS
STGSN
PSKPS
common SCSs =  5
>XP_016861061.1 neural cell adhesion molecule L1-like protein isoform X3 [Homo sapiens]
 >SarsCov2Spike_Specifiedy_by_Mizuno-san
 humanProteinID =  90668 , srsCov2ProteinID =  0
QPTES
VYSTG
YSTGS
STGSN
PSKPS
common SCSs =  5
>XP_016861062.1 neural cell adhesion molecule L1-like protein isoform X3 [Homo sapiens]
 >SarsCov2Spike_Specifiedy_by_Mizuno-san
 humanProteinID =  90669 , srsCov2ProteinID =  0
QPTES
VYSTG
YSTGS
STGSN
PSKPS
common SCSs =  5
>XP_016862257.1 histone-lysine N-methyltransferase SETD5 isoform X2 [Homo sapiens]
 >SarsCov2Spike_Specifiedy_by_Mizuno-san
 humanProteinID =  91458 , srsCov2ProteinID =  0
STGSN
SIAIP
GDIAA
AARDL
SLSST
common SCSs =  5
>XP_016862260.1 histone-lysine N-methyltransferase SETD5 isoform X6 [Homo sapiens]
 >SarsCov2Spike_Specifiedy_by_Mizuno-san
 humanProteinID =  91460 , srsCov2ProteinID =  0
STGSN
SIAIP
GDIAA
AARDL
SLSST
common SCSs =  5
>XP_016862263.1 histone-lysine N-methyltransferase SETD5 isoform X11 [Homo sapiens]
 >SarsCov2Spike_Specifiedy_by_Mizuno-san
 humanProteinID =  91463 , srsCov2ProteinID =  0
STGSN
SIAIP
GDIAA
AARDL
SLSST
common SCSs =  5
>XP_016863015.1 sodium bicarbonate cotransporter 3 isoform X5 [Homo sapiens]
 >SarsCov2Spike_Specifiedy_by_Mizuno-san
 humanProteinID =  91953 , srsCov2ProteinID =  0
DLCFT
TEVPV
LTGIA
TVLPP
PQSAP
common SCSs =  5
>XP_016863016.1 sodium bicarbonate cotransporter 3 isoform X8 [Homo sapiens]
 >SarsCov2Spike_Specifiedy_by_Mizuno-san
 humanProteinID =  91954 , srsCov2ProteinID =  0
DLCFT
TEVPV
LTGIA
TVLPP
PQSAP
common SCSs =  5
>XP_016864187.1 transmembrane protein KIAA1109 isoform X15 [Homo sapiens]
 >SarsCov2Spike_Specifiedy_by_Mizuno-san
 humanProteinID =  92768 , srsCov2ProteinID =  0
VLYNS
NFTIS
DSLSS
SLSST
VKLHY
common SCSs =  5
>XP_016864188.1 transmembrane protein KIAA1109 isoform X16 [Homo sapiens]
 >SarsCov2Spike_Specifiedy_by_Mizuno-san
 humanProteinID =  92769 , srsCov2ProteinID =  0
SSSGW
SSGWT
SGWTA
VLYNS
NFTIS
common SCSs =  5
>XP_016866433.1 fibrocystin isoform X1 [Homo sapiens]
 >SarsCov2Spike_Specifiedy_by_Mizuno-san
 humanProteinID =  94365 , srsCov2ProteinID =  0
QDLFL
VIRGD
GSTPC
KLQDV
ITGRL
common SCSs =  5
>XP_016866434.1 fibrocystin isoform X2 [Homo sapiens]
 >SarsCov2Spike_Specifiedy_by_Mizuno-san
 humanProteinID =  94366 , srsCov2ProteinID =  0
QDLFL
VIRGD
GSTPC
KLQDV
ITGRL
common SCSs =  5
>XP_016866435.1 fibrocystin isoform X4 [Homo sapiens]
 >SarsCov2Spike_Specifiedy_by_Mizuno-san
 humanProteinID =  94367 , srsCov2ProteinID =  0
QDLFL
VIRGD
GSTPC
KLQDV
ITGRL
common SCSs =  5
>XP_016866436.1 fibrocystin isoform X5 [Homo sapiens]
 >SarsCov2Spike_Specifiedy_by_Mizuno-san
 humanProteinID =  94368 , srsCov2ProteinID =  0
QDLFL
VIRGD
GSTPC
KLQDV
ITGRL
common SCSs =  5
>XP_016866439.1 fibrocystin isoform X10 [Homo sapiens]
 >SarsCov2Spike_Specifiedy_by_Mizuno-san
 humanProteinID =  94371 , srsCov2ProteinID =  0
QDLFL
VIRGD
GSTPC
KLQDV
ITGRL
common SCSs =  5
>XP_016866641.1 DNA polymerase zeta catalytic subunit isoform X5 [Homo sapiens]
 >SarsCov2Spike_Specifiedy_by_Mizuno-san
 humanProteinID =  94508 , srsCov2ProteinID =  0
DSSSG
EILPV
ILPVS
KLIAN
SLSST
common SCSs =  5
>XP_016866642.1 DNA polymerase zeta catalytic subunit isoform X5 [Homo sapiens]
 >SarsCov2Spike_Specifiedy_by_Mizuno-san
 humanProteinID =  94509 , srsCov2ProteinID =  0
DSSSG
EILPV
ILPVS
KLIAN
SLSST
common SCSs =  5
>XP_016866643.1 DNA polymerase zeta catalytic subunit isoform X5 [Homo sapiens]
 >SarsCov2Spike_Specifiedy_by_Mizuno-san
 humanProteinID =  94510 , srsCov2ProteinID =  0
DSSSG
EILPV
ILPVS
KLIAN
SLSST
common SCSs =  5
>XP_016867030.1 dyslexia-associated protein KIAA0319 isoform X1 [Homo sapiens]
 >SarsCov2Spike_Specifiedy_by_Mizuno-san
 humanProteinID =  94813 , srsCov2ProteinID =  0
VLLPL
LIVNN
IVNNA
RSYLT
KTSVD
common SCSs =  5
>XP_016867031.1 dyslexia-associated protein KIAA0319 isoform X2 [Homo sapiens]
 >SarsCov2Spike_Specifiedy_by_Mizuno-san
 humanProteinID =  94814 , srsCov2ProteinID =  0
VLLPL
LIVNN
IVNNA
RSYLT
KTSVD
common SCSs =  5
>XP_016867033.1 dyslexia-associated protein KIAA0319 isoform X3 [Homo sapiens]
 >SarsCov2Spike_Specifiedy_by_Mizuno-san
 humanProteinID =  94815 , srsCov2ProteinID =  0
VLLPL
LIVNN
IVNNA
RSYLT
KTSVD
common SCSs =  5
>XP_016867035.1 dyslexia-associated protein KIAA0319 isoform X4 [Homo sapiens]
 >SarsCov2Spike_Specifiedy_by_Mizuno-san
 humanProteinID =  94816 , srsCov2ProteinID =  0
VLLPL
LIVNN
IVNNA
RSYLT
KTSVD
common SCSs =  5
>XP_016867036.1 dyslexia-associated protein KIAA0319 isoform X5 [Homo sapiens]
 >SarsCov2Spike_Specifiedy_by_Mizuno-san
 humanProteinID =  94817 , srsCov2ProteinID =  0
VLLPL
LIVNN
IVNNA
RSYLT
KTSVD
common SCSs =  5
>XP_016867039.1 dyslexia-associated protein KIAA0319 isoform X5 [Homo sapiens]
 >SarsCov2Spike_Specifiedy_by_Mizuno-san
 humanProteinID =  94818 , srsCov2ProteinID =  0
VLLPL
LIVNN
IVNNA
RSYLT
KTSVD
common SCSs =  5
>XP_016867040.1 dyslexia-associated protein KIAA0319 isoform X6 [Homo sapiens]
 >SarsCov2Spike_Specifiedy_by_Mizuno-san
 humanProteinID =  94819 , srsCov2ProteinID =  0
VLLPL
LIVNN
IVNNA
RSYLT
KTSVD
common SCSs =  5
>XP_016870741.1 multiple PDZ domain protein isoform X2 [Homo sapiens]
 >SarsCov2Spike_Specifiedy_by_Mizuno-san
 humanProteinID =  97182 , srsCov2ProteinID =  0
TISVT
FSQIL
QDVVN
TYVPA
GVFVS
common SCSs =  5
>XP_016870742.1 multiple PDZ domain protein isoform X5 [Homo sapiens]
 >SarsCov2Spike_Specifiedy_by_Mizuno-san
 humanProteinID =  97183 , srsCov2ProteinID =  0
TISVT
FSQIL
QDVVN
TYVPA
GVFVS
common SCSs =  5
>XP_016871952.1 WD repeat- and FYVE domain-containing protein 4 isoform X3 [Homo sapiens]
 >SarsCov2Spike_Specifiedy_by_Mizuno-san
 humanProteinID =  97945 , srsCov2ProteinID =  0
STQDL
QSLLI
CNGVE
EDDSE
DDSEP
common SCSs =  5
>XP_016872565.1 homeodomain-interacting protein kinase 3 isoform X1 [Homo sapiens]
 >SarsCov2Spike_Specifiedy_by_Mizuno-san
 humanProteinID =  98332 , srsCov2ProteinID =  0
MDLEG
SPTKL
GCVIA
QPYRV
VSVIT
common SCSs =  5
>XP_016873014.1 teneurin-4 isoform X1 [Homo sapiens]
 >SarsCov2Spike_Specifiedy_by_Mizuno-san
 humanProteinID =  98625 , srsCov2ProteinID =  0
GTTLD
RLFRK
VAIHA
LLAGT
QIITT
common SCSs =  5
>XP_016873015.1 teneurin-4 isoform X2 [Homo sapiens]
 >SarsCov2Spike_Specifiedy_by_Mizuno-san
 humanProteinID =  98626 , srsCov2ProteinID =  0
GTTLD
RLFRK
VAIHA
LLAGT
QIITT
common SCSs =  5
>XP_016873291.1 protein NPAT isoform X2 [Homo sapiens]
 >SarsCov2Spike_Specifiedy_by_Mizuno-san
 humanProteinID =  98821 , srsCov2ProteinID =  0
EILPV
ILPVS
NFSQI
DSLSS
SLSST
common SCSs =  5
>XP_016873292.1 protein NPAT isoform X2 [Homo sapiens]
 >SarsCov2Spike_Specifiedy_by_Mizuno-san
 humanProteinID =  98822 , srsCov2ProteinID =  0
EILPV
ILPVS
NFSQI
DSLSS
SLSST
common SCSs =  5
>XP_016874530.1 protein MON2 homolog isoform X1 [Homo sapiens]
 >SarsCov2Spike_Specifiedy_by_Mizuno-san
 humanProteinID =  99639 , srsCov2ProteinID =  0
SQPFL
QPFLM
SVLND
ILSRL
LDKVE
common SCSs =  5
>XP_016874531.1 protein MON2 homolog isoform X2 [Homo sapiens]
 >SarsCov2Spike_Specifiedy_by_Mizuno-san
 humanProteinID =  99640 , srsCov2ProteinID =  0
SQPFL
QPFLM
SVLND
ILSRL
LDKVE
common SCSs =  5
>XP_016874571.1 WASH complex subunit 4 isoform X3 [Homo sapiens]
 >SarsCov2Spike_Specifiedy_by_Mizuno-san
 humanProteinID =  99678 , srsCov2ProteinID =  0
LMDLE
LKPFE
GGVSV
MTKTS
TKTSV
common SCSs =  5
>XP_016874758.1 inositol 1,4,5-trisphosphate receptor type 2 isoform X3 [Homo sapiens]
 >SarsCov2Spike_Specifiedy_by_Mizuno-san
 humanProteinID =  99807 , srsCov2ProteinID =  0
ENGTI
NGTIT
KLQDV
LQDVV
EVAKN
common SCSs =  5
>XP_016875943.1 E3 ubiquitin-protein ligase MYCBP2 isoform X4 [Homo sapiens]
 >SarsCov2Spike_Specifiedy_by_Mizuno-san
 humanProteinID =  100639 , srsCov2ProteinID =  0
NGTIT
LTVLP
TASAL
ASALG
RLDKV
common SCSs =  5
>XP_016875944.1 E3 ubiquitin-protein ligase MYCBP2 isoform X9 [Homo sapiens]
 >SarsCov2Spike_Specifiedy_by_Mizuno-san
 humanProteinID =  100640 , srsCov2ProteinID =  0
NGTIT
LTVLP
TASAL
ASALG
RLDKV
common SCSs =  5
>XP_016875949.1 E3 ubiquitin-protein ligase MYCBP2 isoform X19 [Homo sapiens]
 >SarsCov2Spike_Specifiedy_by_Mizuno-san
 humanProteinID =  100645 , srsCov2ProteinID =  0
NGTIT
LTVLP
TASAL
ASALG
RLDKV
common SCSs =  5
>XP_016875957.1 E3 ubiquitin-protein ligase MYCBP2 isoform X27 [Homo sapiens]
 >SarsCov2Spike_Specifiedy_by_Mizuno-san
 humanProteinID =  100653 , srsCov2ProteinID =  0
NGTIT
LTVLP
TASAL
ASALG
RLDKV
common SCSs =  5
>XP_016876585.1 pecanex-like protein 1 isoform X7 [Homo sapiens]
 >SarsCov2Spike_Specifiedy_by_Mizuno-san
 humanProteinID =  101080 , srsCov2ProteinID =  0
AIHVS
TLLAL
DPLSE
SVASQ
VASQS
common SCSs =  5
>XP_016876586.1 pecanex-like protein 1 isoform X11 [Homo sapiens]
 >SarsCov2Spike_Specifiedy_by_Mizuno-san
 humanProteinID =  101081 , srsCov2ProteinID =  0
AIHVS
TLLAL
DPLSE
SVASQ
VASQS
common SCSs =  5
>XP_016878526.1 NLR family CARD domain-containing protein 3 isoform X2 [Homo sapiens]
 >SarsCov2Spike_Specifiedy_by_Mizuno-san
 humanProteinID =  102421 , srsCov2ProteinID =  0
NIIRG
AAAYY
TLEIL
LEILD
ALLAG
common SCSs =  5
>XP_016878527.1 NLR family CARD domain-containing protein 3 isoform X3 [Homo sapiens]
 >SarsCov2Spike_Specifiedy_by_Mizuno-san
 humanProteinID =  102422 , srsCov2ProteinID =  0
NIIRG
AAAYY
TLEIL
LEILD
ALLAG
common SCSs =  5
>XP_016879273.1 zinc finger protein 469 isoform X1 [Homo sapiens]
 >SarsCov2Spike_Specifiedy_by_Mizuno-san
 humanProteinID =  102957 , srsCov2ProteinID =  0
DCALD
ILPVS
LADAG
SSTAS
PQSAP
common SCSs =  5
>XP_016879978.1 KAT8 regulatory NSL complex subunit 1 isoform X6 [Homo sapiens]
 >SarsCov2Spike_Specifiedy_by_Mizuno-san
 humanProteinID =  103489 , srsCov2ProteinID =  0
NGTKR
PGDSS
DSSSG
YSNNS
LGKLQ
common SCSs =  5
>XP_016881173.1 structural maintenance of chromosomes flexible hinge domain-containing protein 1 isoform X3 [Homo sapiens]
 >SarsCov2Spike_Specifiedy_by_Mizuno-san
 humanProteinID =  104315 , srsCov2ProteinID =  0
LVRDL
SIVRF
DLCFT
RSVAS
ILPDP
common SCSs =  5
>XP_016881495.1 FH1/FH2 domain-containing protein 3 isoform X5 [Homo sapiens]
 >SarsCov2Spike_Specifiedy_by_Mizuno-san
 humanProteinID =  104538 , srsCov2ProteinID =  0
DSKVG
GLTVL
LTVLP
TVLPP
DVDLG
common SCSs =  5
>XP_016881496.1 FH1/FH2 domain-containing protein 3 isoform X7 [Homo sapiens]
 >SarsCov2Spike_Specifiedy_by_Mizuno-san
 humanProteinID =  104539 , srsCov2ProteinID =  0
DSKVG
GLTVL
LTVLP
TVLPP
DVDLG
common SCSs =  5
>XP_016881497.1 FH1/FH2 domain-containing protein 3 isoform X8 [Homo sapiens]
 >SarsCov2Spike_Specifiedy_by_Mizuno-san
 humanProteinID =  104540 , srsCov2ProteinID =  0
DSKVG
GLTVL
LTVLP
TVLPP
DVDLG
common SCSs =  5
>XP_016881499.1 FH1/FH2 domain-containing protein 3 isoform X15 [Homo sapiens]
 >SarsCov2Spike_Specifiedy_by_Mizuno-san
 humanProteinID =  104542 , srsCov2ProteinID =  0
DSKVG
GLTVL
LTVLP
TVLPP
DVDLG
common SCSs =  5
>XP_016884695.1 E3 ubiquitin-protein ligase HUWE1 isoform X12 [Homo sapiens]
 >SarsCov2Spike_Specifiedy_by_Mizuno-san
 humanProteinID =  106823 , srsCov2ProteinID =  0
LLPLV
LADAG
STASA
TASAL
EAEVQ
common SCSs =  5
>XP_024303476.1 multiple PDZ domain protein isoform X1 [Homo sapiens]
 >SarsCov2Spike_Specifiedy_by_Mizuno-san
 humanProteinID =  109010 , srsCov2ProteinID =  0
TISVT
FSQIL
QDVVN
TYVPA
GVFVS
common SCSs =  5
>XP_024304707.1 golgin subfamily A member 3 isoform X1 [Homo sapiens]
 >SarsCov2Spike_Specifiedy_by_Mizuno-san
 humanProteinID =  110109 , srsCov2ProteinID =  0
ESNKK
QDSLS
DSLSS
LQSLQ
KEELD
common SCSs =  5
>XP_024304708.1 golgin subfamily A member 3 isoform X1 [Homo sapiens]
 >SarsCov2Spike_Specifiedy_by_Mizuno-san
 humanProteinID =  110110 , srsCov2ProteinID =  0
ESNKK
QDSLS
DSLSS
LQSLQ
KEELD
common SCSs =  5
>XP_024304709.1 golgin subfamily A member 3 isoform X1 [Homo sapiens]
 >SarsCov2Spike_Specifiedy_by_Mizuno-san
 humanProteinID =  110111 , srsCov2ProteinID =  0
ESNKK
QDSLS
DSLSS
LQSLQ
KEELD
common SCSs =  5
>XP_024304710.1 golgin subfamily A member 3 isoform X1 [Homo sapiens]
 >SarsCov2Spike_Specifiedy_by_Mizuno-san
 humanProteinID =  110112 , srsCov2ProteinID =  0
ESNKK
QDSLS
DSLSS
LQSLQ
KEELD
common SCSs =  5
>XP_024304711.1 golgin subfamily A member 3 isoform X2 [Homo sapiens]
 >SarsCov2Spike_Specifiedy_by_Mizuno-san
 humanProteinID =  110113 , srsCov2ProteinID =  0
ESNKK
QDSLS
DSLSS
LQSLQ
KEELD
common SCSs =  5
>XP_024305281.1 pecanex-like protein 1 isoform X9 [Homo sapiens]
 >SarsCov2Spike_Specifiedy_by_Mizuno-san
 humanProteinID =  110638 , srsCov2ProteinID =  0
AIHVS
TLLAL
DPLSE
SVASQ
VASQS
common SCSs =  5
>XP_024306781.1 dynein heavy chain 17, axonemal isoform X2 [Homo sapiens]
 >SarsCov2Spike_Specifiedy_by_Mizuno-san
 humanProteinID =  112000 , srsCov2ProteinID =  0
RTQLP
LDPLS
KKFLP
YSTGS
LIGAE
common SCSs =  5
>XP_024307036.1 FH1/FH2 domain-containing protein 3 isoform X13 [Homo sapiens]
 >SarsCov2Spike_Specifiedy_by_Mizuno-san
 humanProteinID =  112220 , srsCov2ProteinID =  0
DSKVG
GLTVL
LTVLP
TVLPP
DVDLG
common SCSs =  5
>XP_024308740.1 telomere-associated protein RIF1 isoform X2 [Homo sapiens]
 >SarsCov2Spike_Specifiedy_by_Mizuno-san
 humanProteinID =  113641 , srsCov2ProteinID =  0
NGTKR
IYQAG
QKLIA
ISSVL
QLIRA
common SCSs =  5
>XP_024308961.1 protein TANC1 isoform X17 [Homo sapiens]
 >SarsCov2Spike_Specifiedy_by_Mizuno-san
 humanProteinID =  113850 , srsCov2ProteinID =  0
TRAGC
KRSFI
RSFIE
SSTAS
FPREG
common SCSs =  5
>NP_000018.2 N(4)-(beta-N-acetylglucosaminyl)-L-asparaginase isoform 1 preproprotein [Homo sapiens]
 >SarsCov2Spike_Specifiedy_by_Mizuno-san
 humanProteinID =  13 , srsCov2ProteinID =  0
TAGAA
AGAAA
RKSNL
PDPSK
common SCSs =  4
>NP_000186.2 Hermansky-Pudlak syndrome 1 protein isoform a [Homo sapiens]
 >SarsCov2Spike_Specifiedy_by_Mizuno-san
 humanProteinID =  175 , srsCov2ProteinID =  0
LLALH
SPRRA
PRRAR
RRARS
common SCSs =  4
>NP_000417.3 laminin subunit alpha-2 isoform a precursor [Homo sapiens]
 >SarsCov2Spike_Specifiedy_by_Mizuno-san
 humanProteinID =  398 , srsCov2ProteinID =  0
FGGVS
GKIQD
LNTLV
QKEID
common SCSs =  4
>NP_000817.5 glutamate receptor 2 isoform 1 precursor [Homo sapiens]
 >SarsCov2Spike_Specifiedy_by_Mizuno-san
 humanProteinID =  756 , srsCov2ProteinID =  0
NLDSK
KVGGN
YTSAL
ANLAA
common SCSs =  4
>NP_000818.2 glutamate receptor 1 isoform 1 precursor [Homo sapiens]
 >SarsCov2Spike_Specifiedy_by_Mizuno-san
 humanProteinID =  757 , srsCov2ProteinID =  0
NLDSK
KVGGN
YTSAL
ANLAA
common SCSs =  4
>NP_000819.4 glutamate receptor 3 isoform 2 precursor [Homo sapiens]
 >SarsCov2Spike_Specifiedy_by_Mizuno-san
 humanProteinID =  758 , srsCov2ProteinID =  0
NLDSK
KVGGN
YTSAL
ANLAA
common SCSs =  4
>NP_000820.4 glutamate receptor 4 isoform 1 precursor [Homo sapiens]
 >SarsCov2Spike_Specifiedy_by_Mizuno-san
 humanProteinID =  759 , srsCov2ProteinID =  0
NLDSK
KVGGN
YTSAL
ANLAA
common SCSs =  4
>NP_000871.1 interleukin-7 isoform 1 precursor [Homo sapiens]
 >SarsCov2Spike_Specifiedy_by_Mizuno-san
 humanProteinID =  809 , srsCov2ProteinID =  0
LVLLP
KLNDL
LNDLC
NDLCF
common SCSs =  4
>NP_001002838.1 serine/threonine-protein kinase WNK3 isoform 2 [Homo sapiens]
 >SarsCov2Spike_Specifiedy_by_Mizuno-san
 humanProteinID =  1181 , srsCov2ProteinID =  0
DSKTQ
SKTQS
SVAYS
FNKVT
common SCSs =  4
>NP_001004356.1 fibroblast growth factor receptor-like 1 precursor [Homo sapiens]
 >SarsCov2Spike_Specifiedy_by_Mizuno-san
 humanProteinID =  1361 , srsCov2ProteinID =  0
DSSSG
LTVLP
LPPLL
VVIGI
common SCSs =  4
>NP_001004358.1 fibroblast growth factor receptor-like 1 precursor [Homo sapiens]
 >SarsCov2Spike_Specifiedy_by_Mizuno-san
 humanProteinID =  1362 , srsCov2ProteinID =  0
DSSSG
LTVLP
LPPLL
VVIGI
common SCSs =  4
>NP_001004416.2 uromodulin-like 1 isoform 1 precursor [Homo sapiens]
 >SarsCov2Spike_Specifiedy_by_Mizuno-san
 humanProteinID =  1364 , srsCov2ProteinID =  0
VIRGD
KSNLK
LGDIA
SNGTH
common SCSs =  4
>NP_001005271.2 chromodomain-helicase-DNA-binding protein 3 isoform 3 [Homo sapiens]
 >SarsCov2Spike_Specifiedy_by_Mizuno-san
 humanProteinID =  1557 , srsCov2ProteinID =  0
LVRDL
LPPLL
ILSRL
PVLKG
common SCSs =  4
>NP_001005273.1 chromodomain-helicase-DNA-binding protein 3 isoform 1 [Homo sapiens]
 >SarsCov2Spike_Specifiedy_by_Mizuno-san
 humanProteinID =  1559 , srsCov2ProteinID =  0
LVRDL
LPPLL
ILSRL
PVLKG
common SCSs =  4
>NP_001005751.1 WASH complex subunit 2A isoform 1 [Homo sapiens]
 >SarsCov2Spike_Specifiedy_by_Mizuno-san
 humanProteinID =  1685 , srsCov2ProteinID =  0
SKPSK
IGKIQ
PDVDL
EPVLK
common SCSs =  4
>NP_001008781.2 protocadherin Fat 3 isoform 2 precursor [Homo sapiens]
 >SarsCov2Spike_Specifiedy_by_Mizuno-san
 humanProteinID =  1962 , srsCov2ProteinID =  0
DSSSG
SLSST
LSSTA
MVTIM
common SCSs =  4
>NP_001009954.1 DNA excision repair protein ERCC-6-like isoform b [Homo sapiens]
 >SarsCov2Spike_Specifiedy_by_Mizuno-san
 humanProteinID =  2029 , srsCov2ProteinID =  0
FLMDL
KEELD
SPDVD
DEDDS
common SCSs =  4
>NP_001013049.1 VPS10 domain-containing receptor SorCS1 isoform b precursor [Homo sapiens]
 >SarsCov2Spike_Specifiedy_by_Mizuno-san
 humanProteinID =  2287 , srsCov2ProteinID =  0
TRGVY
PLVDL
SALLA
ALLAG
common SCSs =  4
>NP_001018125.1 Fanconi anemia group D2 protein isoform b [Homo sapiens]
 >SarsCov2Spike_Specifiedy_by_Mizuno-san
 humanProteinID =  2600 , srsCov2ProteinID =  0
EKSNI
LDITP
STASA
KQLSS
common SCSs =  4
>NP_001019554.1 neuron navigator 3 isoform 1 [Homo sapiens]
 >SarsCov2Spike_Specifiedy_by_Mizuno-san
 humanProteinID =  2645 , srsCov2ProteinID =  0
TITSG
TGRLQ
GRLQS
RLQSL
common SCSs =  4
>NP_001025053.1 AT-hook DNA-binding motif-containing protein 1 [Homo sapiens]
 >SarsCov2Spike_Specifiedy_by_Mizuno-san
 humanProteinID =  2818 , srsCov2ProteinID =  0
ALEPL
ALDPL
PSKRS
FKEEL
common SCSs =  4
>NP_001030126.2 sorbin and SH3 domain-containing protein 1 isoform 3 [Homo sapiens]
 >SarsCov2Spike_Specifiedy_by_Mizuno-san
 humanProteinID =  3088 , srsCov2ProteinID =  0
STQDL
FNFNG
RSVAS
DIAAR
common SCSs =  4
>NP_001032412.2 helicase with zinc finger domain 2 isoform 1 [Homo sapiens]
 >SarsCov2Spike_Specifiedy_by_Mizuno-san
 humanProteinID =  3151 , srsCov2ProteinID =  0
AGAAA
RVVVL
VVVLS
RRARS
common SCSs =  4
>NP_001033.1 solute carrier family 2, facilitated glucose transporter member 4 [Homo sapiens]
 >SarsCov2Spike_Specifiedy_by_Mizuno-san
 humanProteinID =  3197 , srsCov2ProteinID =  0
LVLLP
GLTVL
LTVLP
SGINA
common SCSs =  4
>NP_001035544.1 solute carrier family 26 member 6 isoform 4 [Homo sapiens]
 >SarsCov2Spike_Specifiedy_by_Mizuno-san
 humanProteinID =  3473 , srsCov2ProteinID =  0
KVFRS
VFRSS
ALLAG
GAISS
common SCSs =  4
>NP_001070711.3 glutamate receptor 4 isoform 2 precursor [Homo sapiens]
 >SarsCov2Spike_Specifiedy_by_Mizuno-san
 humanProteinID =  3834 , srsCov2ProteinID =  0
NLDSK
KVGGN
YTSAL
ANLAA
common SCSs =  4
>NP_001070729.2 nuclear receptor corepressor 2 isoform 2 [Homo sapiens]
 >SarsCov2Spike_Specifiedy_by_Mizuno-san
 humanProteinID =  3836 , srsCov2ProteinID =  0
AAAYY
AGSTP
LTESN
EELDK
common SCSs =  4
>NP_001072.2 cubilin precursor [Homo sapiens]
 >SarsCov2Spike_Specifiedy_by_Mizuno-san
 humanProteinID =  3933 , srsCov2ProteinID =  0
QGFSA
GDSSS
ATVCG
VNCTE
common SCSs =  4
>NP_001073291.2 laminin subunit alpha-2 isoform b precursor [Homo sapiens]
 >SarsCov2Spike_Specifiedy_by_Mizuno-san
 humanProteinID =  3982 , srsCov2ProteinID =  0
FGGVS
GKIQD
LNTLV
QKEID
common SCSs =  4
>NP_001074010.2 MAX gene-associated protein isoform 2 [Homo sapiens]
 >SarsCov2Spike_Specifiedy_by_Mizuno-san
 humanProteinID =  4163 , srsCov2ProteinID =  0
NVVIK
LMDLE
LDPLS
PSKPS
common SCSs =  4
>NP_001077086.1 RB1-inducible coiled-coil protein 1 isoform 2 [Homo sapiens]
 >SarsCov2Spike_Specifiedy_by_Mizuno-san
 humanProteinID =  4292 , srsCov2ProteinID =  0
LVSSQ
GDSSS
LFRKS
SFCTQ
common SCSs =  4
>NP_001077088.2 glutamate receptor 2 isoform 2 precursor [Homo sapiens]
 >SarsCov2Spike_Specifiedy_by_Mizuno-san
 humanProteinID =  4293 , srsCov2ProteinID =  0
NLDSK
KVGGN
YTSAL
ANLAA
common SCSs =  4
>NP_001077089.2 glutamate receptor 2 isoform 3 [Homo sapiens]
 >SarsCov2Spike_Specifiedy_by_Mizuno-san
 humanProteinID =  4294 , srsCov2ProteinID =  0
NLDSK
KVGGN
YTSAL
ANLAA
common SCSs =  4
>NP_001091868.1 coatomer subunit alpha isoform 1 [Homo sapiens]
 >SarsCov2Spike_Specifiedy_by_Mizuno-san
 humanProteinID =  4447 , srsCov2ProteinID =  0
KLNDL
TTDAV
QSIIA
SIIAY
common SCSs =  4
>NP_001094058.1 roquin-2 isoform 1 [Homo sapiens]
 >SarsCov2Spike_Specifiedy_by_Mizuno-san
 humanProteinID =  4762 , srsCov2ProteinID =  0
PLVSS
EILDI
AENSV
VNNTV
common SCSs =  4
>NP_001094348.1 maestro heat-like repeat-containing protein family member 6 [Homo sapiens]
 >SarsCov2Spike_Specifiedy_by_Mizuno-san
 humanProteinID =  4792 , srsCov2ProteinID =  0
SALEP
LPPLL
GRLQS
IRASA
common SCSs =  4
>NP_001098676.2 laminin subunit alpha-4 isoform 1 precursor [Homo sapiens]
 >SarsCov2Spike_Specifiedy_by_Mizuno-san
 humanProteinID =  4934 , srsCov2ProteinID =  0
RSVAS
GGFNF
SLSST
LSSTA
common SCSs =  4
>NP_001098677.2 laminin subunit alpha-4 isoform 2 precursor [Homo sapiens]
 >SarsCov2Spike_Specifiedy_by_Mizuno-san
 humanProteinID =  4935 , srsCov2ProteinID =  0
RSVAS
GGFNF
SLSST
LSSTA
common SCSs =  4
>NP_001104488.1 neuron navigator 2 isoform 3 [Homo sapiens]
 >SarsCov2Spike_Specifiedy_by_Mizuno-san
 humanProteinID =  5038 , srsCov2ProteinID =  0
MDLEG
TISVT
FNFSQ
RLQSL
common SCSs =  4
>NP_001107655.1 glutamate receptor 1 isoform 2 precursor [Homo sapiens]
 >SarsCov2Spike_Specifiedy_by_Mizuno-san
 humanProteinID =  5176 , srsCov2ProteinID =  0
NLDSK
KVGGN
YTSAL
ANLAA
common SCSs =  4
>NP_001108410.2 coiled-coil domain-containing protein 17 isoform 1 [Homo sapiens]
 >SarsCov2Spike_Specifiedy_by_Mizuno-san
 humanProteinID =  5213 , srsCov2ProteinID =  0
VFRSS
SALLA
AAEIR
AEIRA
common SCSs =  4
>NP_001121189.2 laminin subunit alpha-3 isoform 3 precursor [Homo sapiens]
 >SarsCov2Spike_Specifiedy_by_Mizuno-san
 humanProteinID =  5554 , srsCov2ProteinID =  0
LVLLP
EKGIY
SASFS
DLQEL
common SCSs =  4
>NP_001121687.1 lipase member M precursor [Homo sapiens]
 >SarsCov2Spike_Specifiedy_by_Mizuno-san
 humanProteinID =  5608 , srsCov2ProteinID =  0
YYVGY
ASVYA
LADAG
ADAGF
common SCSs =  4
>NP_001124330.1 inositol hexakisphosphate and diphosphoinositol-pentakisphosphate kinase 1 isoform 5 [Homo sapiens]
 >SarsCov2Spike_Specifiedy_by_Mizuno-san
 humanProteinID =  5954 , srsCov2ProteinID =  0
DPLSE
RLFRK
DSLSS
EPQII
common SCSs =  4
>NP_001124331.1 inositol hexakisphosphate and diphosphoinositol-pentakisphosphate kinase 1 isoform 2 [Homo sapiens]
 >SarsCov2Spike_Specifiedy_by_Mizuno-san
 humanProteinID =  5955 , srsCov2ProteinID =  0
DPLSE
RLFRK
DSLSS
EPQII
common SCSs =  4
>NP_001136272.1 protein eyes shut homolog isoform 1 precursor [Homo sapiens]
 >SarsCov2Spike_Specifiedy_by_Mizuno-san
 humanProteinID =  6917 , srsCov2ProteinID =  0
TQSLL
GSFCT
TITSG
TSGWT
common SCSs =  4
>NP_001137475.1 SLIT and NTRK-like protein 2 precursor [Homo sapiens]
 >SarsCov2Spike_Specifiedy_by_Mizuno-san
 humanProteinID =  7091 , srsCov2ProteinID =  0
ADYNY
LQYGS
LQSLQ
IDLQE
common SCSs =  4
>NP_001137476.1 SLIT and NTRK-like protein 2 precursor [Homo sapiens]
 >SarsCov2Spike_Specifiedy_by_Mizuno-san
 humanProteinID =  7092 , srsCov2ProteinID =  0
ADYNY
LQYGS
LQSLQ
IDLQE
common SCSs =  4
>NP_001137477.1 SLIT and NTRK-like protein 2 precursor [Homo sapiens]
 >SarsCov2Spike_Specifiedy_by_Mizuno-san
 humanProteinID =  7093 , srsCov2ProteinID =  0
ADYNY
LQYGS
LQSLQ
IDLQE
common SCSs =  4
>NP_001137478.1 SLIT and NTRK-like protein 2 precursor [Homo sapiens]
 >SarsCov2Spike_Specifiedy_by_Mizuno-san
 humanProteinID =  7094 , srsCov2ProteinID =  0
ADYNY
LQYGS
LQSLQ
IDLQE
common SCSs =  4
>NP_001137480.1 SLIT and NTRK-like protein 2 precursor [Homo sapiens]
 >SarsCov2Spike_Specifiedy_by_Mizuno-san
 humanProteinID =  7095 , srsCov2ProteinID =  0
ADYNY
LQYGS
LQSLQ
IDLQE
common SCSs =  4
>NP_001137481.1 SLIT and NTRK-like protein 2 precursor [Homo sapiens]
 >SarsCov2Spike_Specifiedy_by_Mizuno-san
 humanProteinID =  7096 , srsCov2ProteinID =  0
ADYNY
LQYGS
LQSLQ
IDLQE
common SCSs =  4
>NP_001137482.1 SLIT and NTRK-like protein 2 precursor [Homo sapiens]
 >SarsCov2Spike_Specifiedy_by_Mizuno-san
 humanProteinID =  7097 , srsCov2ProteinID =  0
ADYNY
LQYGS
LQSLQ
IDLQE
common SCSs =  4
>NP_001137532.1 NHS-like protein 1 isoform 2 [Homo sapiens]
 >SarsCov2Spike_Specifiedy_by_Mizuno-san
 humanProteinID =  7113 , srsCov2ProteinID =  0
IAIPT
NIQKE
LNESL
NESLI
common SCSs =  4
>NP_001138424.1 protein sidekick-2 precursor [Homo sapiens]
 >SarsCov2Spike_Specifiedy_by_Mizuno-san
 humanProteinID =  7226 , srsCov2ProteinID =  0
TLLAL
LLALH
RARSV
AENSV
common SCSs =  4
>NP_001138678.1 uncharacterized protein KIAA1671 [Homo sapiens]
 >SarsCov2Spike_Specifiedy_by_Mizuno-san
 humanProteinID =  7367 , srsCov2ProteinID =  0
RSSVL
LDPLS
LYENQ
TASAL
common SCSs =  4
>NP_001138887.1 histone-lysine N-methyltransferase SETDB1 isoform 1 [Homo sapiens]
 >SarsCov2Spike_Specifiedy_by_Mizuno-san
 humanProteinID =  7480 , srsCov2ProteinID =  0
LTGTG
ILDIT
IYKTP
STASA
common SCSs =  4
>NP_001155155.1 otoancorin isoform 3 [Homo sapiens]
 >SarsCov2Spike_Specifiedy_by_Mizuno-san
 humanProteinID =  8123 , srsCov2ProteinID =  0
SEFRV
ALLAG
LQSLQ
LQELG
common SCSs =  4
>NP_001157745.1 MAX gene-associated protein isoform 1 [Homo sapiens]
 >SarsCov2Spike_Specifiedy_by_Mizuno-san
 humanProteinID =  8317 , srsCov2ProteinID =  0
NVVIK
LMDLE
LDPLS
PSKPS
common SCSs =  4
>NP_001157979.1 nebulin isoform 1 [Homo sapiens]
 >SarsCov2Spike_Specifiedy_by_Mizuno-san
 humanProteinID =  8400 , srsCov2ProteinID =  0
ISSVL
RAAEI
SGINA
GINAS
common SCSs =  4
>NP_001157980.2 nebulin isoform 2 [Homo sapiens]
 >SarsCov2Spike_Specifiedy_by_Mizuno-san
 humanProteinID =  8401 , srsCov2ProteinID =  0
ISSVL
RAAEI
SGINA
GINAS
common SCSs =  4
>NP_001159719.1 glutamate receptor ionotropic, kainate 2 isoform 3 precursor [Homo sapiens]
 >SarsCov2Spike_Specifiedy_by_Mizuno-san
 humanProteinID =  8670 , srsCov2ProteinID =  0
ASALG
ANLAA
FVTQR
VTQRN
common SCSs =  4
>NP_001161328.1 protein strawberry notch homolog 1 isoform 1 [Homo sapiens]
 >SarsCov2Spike_Specifiedy_by_Mizuno-san
 humanProteinID =  8831 , srsCov2ProteinID =  0
VSGTN
QQFGR
SALLA
VSNGT
common SCSs =  4
>NP_001161832.1 protocadherin-11 X-linked isoform e precursor [Homo sapiens]
 >SarsCov2Spike_Specifiedy_by_Mizuno-san
 humanProteinID =  8920 , srsCov2ProteinID =  0
ALHRS
AGTIT
AQEKN
DNTFV
common SCSs =  4
>NP_001161834.1 protocadherin-11 X-linked isoform g precursor [Homo sapiens]
 >SarsCov2Spike_Specifiedy_by_Mizuno-san
 humanProteinID =  8922 , srsCov2ProteinID =  0
ALHRS
AGTIT
AQEKN
DNTFV
common SCSs =  4
>NP_001161835.1 protocadherin-11 X-linked isoform h precursor [Homo sapiens]
 >SarsCov2Spike_Specifiedy_by_Mizuno-san
 humanProteinID =  8923 , srsCov2ProteinID =  0
ALHRS
AGTIT
AQEKN
DNTFV
common SCSs =  4
>NP_001164100.1 chromodomain-helicase-DNA-binding protein 8 isoform 1 [Homo sapiens]
 >SarsCov2Spike_Specifiedy_by_Mizuno-san
 humanProteinID =  9014 , srsCov2ProteinID =  0
IEDLL
PQSAP
PLQPE
DEDDS
common SCSs =  4
>NP_001165459.1 N(4)-(beta-N-acetylglucosaminyl)-L-asparaginase isoform 2 precursor [Homo sapiens]
 >SarsCov2Spike_Specifiedy_by_Mizuno-san
 humanProteinID =  9238 , srsCov2ProteinID =  0
TAGAA
AGAAA
RKSNL
PDPSK
common SCSs =  4
>NP_001166028.1 golgin subfamily A member 3 isoform 2 [Homo sapiens]
 >SarsCov2Spike_Specifiedy_by_Mizuno-san
 humanProteinID =  9299 , srsCov2ProteinID =  0
QDSLS
DSLSS
LQSLQ
KEELD
common SCSs =  4
>NP_001177111.1 coiled-coil domain-containing protein 17 isoform 2 [Homo sapiens]
 >SarsCov2Spike_Specifiedy_by_Mizuno-san
 humanProteinID =  9953 , srsCov2ProteinID =  0
VFRSS
SALLA
AAEIR
AEIRA
common SCSs =  4
>NP_001177143.1 inositol hexakisphosphate and diphosphoinositol-pentakisphosphate kinase 1 isoform 6 [Homo sapiens]
 >SarsCov2Spike_Specifiedy_by_Mizuno-san
 humanProteinID =  9956 , srsCov2ProteinID =  0
DPLSE
RLFRK
DSLSS
EPQII
common SCSs =  4
>NP_001177369.1 nuclear receptor corepressor 1 isoform 3 [Homo sapiens]
 >SarsCov2Spike_Specifiedy_by_Mizuno-san
 humanProteinID =  9986 , srsCov2ProteinID =  0
GTNGT
YNSAS
SVITP
GAENS
common SCSs =  4
>NP_001186456.2 uromodulin-like 1 isoform 3 [Homo sapiens]
 >SarsCov2Spike_Specifiedy_by_Mizuno-san
 humanProteinID =  10927 , srsCov2ProteinID =  0
VIRGD
KSNLK
LGDIA
SNGTH
common SCSs =  4
>NP_001186457.3 uromodulin-like 1 isoform 4 [Homo sapiens]
 >SarsCov2Spike_Specifiedy_by_Mizuno-san
 humanProteinID =  10928 , srsCov2ProteinID =  0
VIRGD
KSNLK
LGDIA
SNGTH
common SCSs =  4
>NP_001186815.1 interleukin-7 isoform 2 precursor [Homo sapiens]
 >SarsCov2Spike_Specifiedy_by_Mizuno-san
 humanProteinID =  11062 , srsCov2ProteinID =  0
LVLLP
KLNDL
LNDLC
NDLCF
common SCSs =  4
>NP_001186816.1 interleukin-7 isoform 3 precursor [Homo sapiens]
 >SarsCov2Spike_Specifiedy_by_Mizuno-san
 humanProteinID =  11063 , srsCov2ProteinID =  0
LVLLP
KLNDL
LNDLC
NDLCF
common SCSs =  4
>NP_001186817.1 interleukin-7 isoform 4 precursor [Homo sapiens]
 >SarsCov2Spike_Specifiedy_by_Mizuno-san
 humanProteinID =  11064 , srsCov2ProteinID =  0
LVLLP
KLNDL
LNDLC
NDLCF
common SCSs =  4
>NP_001191354.2 BIVM-ERCC5 protein [Homo sapiens]
 >SarsCov2Spike_Specifiedy_by_Mizuno-san
 humanProteinID =  11454 , srsCov2ProteinID =  0
GTITD
KVGGN
IYKTP
VLPPL
common SCSs =  4
>NP_001193498.1 VPS10 domain-containing receptor SorCS1 isoform c precursor [Homo sapiens]
 >SarsCov2Spike_Specifiedy_by_Mizuno-san
 humanProteinID =  11601 , srsCov2ProteinID =  0
TRGVY
PLVDL
SALLA
ALLAG
common SCSs =  4
>NP_001193499.1 VPS10 domain-containing receptor SorCS1 isoform d precursor [Homo sapiens]
 >SarsCov2Spike_Specifiedy_by_Mizuno-san
 humanProteinID =  11602 , srsCov2ProteinID =  0
TRGVY
PLVDL
SALLA
ALLAG
common SCSs =  4
>NP_001193500.1 VPS10 domain-containing receptor SorCS1 isoform e precursor [Homo sapiens]
 >SarsCov2Spike_Specifiedy_by_Mizuno-san
 humanProteinID =  11603 , srsCov2ProteinID =  0
TRGVY
PLVDL
SALLA
ALLAG
common SCSs =  4
>NP_001193501.1 VPS10 domain-containing receptor SorCS1 isoform f precursor [Homo sapiens]
 >SarsCov2Spike_Specifiedy_by_Mizuno-san
 humanProteinID =  11604 , srsCov2ProteinID =  0
TRGVY
PLVDL
SALLA
ALLAG
common SCSs =  4
>NP_001193583.1 nuclear receptor corepressor 2 isoform 3 [Homo sapiens]
 >SarsCov2Spike_Specifiedy_by_Mizuno-san
 humanProteinID =  11621 , srsCov2ProteinID =  0
AAAYY
AGSTP
LTESN
EELDK
common SCSs =  4
>NP_001231892.1 neuron navigator 2 isoform 5 [Homo sapiens]
 >SarsCov2Spike_Specifiedy_by_Mizuno-san
 humanProteinID =  12509 , srsCov2ProteinID =  0
MDLEG
TISVT
FNFSQ
RLQSL
common SCSs =  4
>NP_001244948.1 glutamate receptor 1 isoform 3 precursor [Homo sapiens]
 >SarsCov2Spike_Specifiedy_by_Mizuno-san
 humanProteinID =  13440 , srsCov2ProteinID =  0
NLDSK
KVGGN
YTSAL
ANLAA
common SCSs =  4
>NP_001244949.1 glutamate receptor 1 isoform 4 [Homo sapiens]
 >SarsCov2Spike_Specifiedy_by_Mizuno-san
 humanProteinID =  13441 , srsCov2ProteinID =  0
NLDSK
KVGGN
YTSAL
ANLAA
common SCSs =  4
>NP_001244950.1 glutamate receptor 1 isoform 5 [Homo sapiens]
 >SarsCov2Spike_Specifiedy_by_Mizuno-san
 humanProteinID =  13442 , srsCov2ProteinID =  0
NLDSK
KVGGN
YTSAL
ANLAA
common SCSs =  4
>NP_001244951.1 glutamate receptor 1 isoform 6 [Homo sapiens]
 >SarsCov2Spike_Specifiedy_by_Mizuno-san
 humanProteinID =  13443 , srsCov2ProteinID =  0
NLDSK
KVGGN
YTSAL
ANLAA
common SCSs =  4
>NP_001244952.1 glutamate receptor 1 isoform 7 [Homo sapiens]
 >SarsCov2Spike_Specifiedy_by_Mizuno-san
 humanProteinID =  13444 , srsCov2ProteinID =  0
NLDSK
KVGGN
YTSAL
ANLAA
common SCSs =  4
>NP_001257449.1 disheveled-associated activator of morphogenesis 1 isoform 2 [Homo sapiens]
 >SarsCov2Spike_Specifiedy_by_Mizuno-san
 humanProteinID =  14097 , srsCov2ProteinID =  0
TRFQT
RFQTL
NRKRI
RLQSL
common SCSs =  4
>NP_001257903.1 hydrocephalus-inducing protein homolog isoform a [Homo sapiens]
 >SarsCov2Spike_Specifiedy_by_Mizuno-san
 humanProteinID =  14205 , srsCov2ProteinID =  0
QLPPA
IYQAG
ILPVS
VLPPL
common SCSs =  4
>NP_001258137.2 nebulin isoform 4 [Homo sapiens]
 >SarsCov2Spike_Specifiedy_by_Mizuno-san
 humanProteinID =  14268 , srsCov2ProteinID =  0
ISSVL
RAAEI
SGINA
GINAS
common SCSs =  4
>NP_001258572.1 thyroid adenoma-associated protein isoform b [Homo sapiens]
 >SarsCov2Spike_Specifiedy_by_Mizuno-san
 humanProteinID =  14330 , srsCov2ProteinID =  0
RFQTL
TLKSF
SVDCT
ISSVL
common SCSs =  4
>NP_001258573.1 thyroid adenoma-associated protein isoform c [Homo sapiens]
 >SarsCov2Spike_Specifiedy_by_Mizuno-san
 humanProteinID =  14331 , srsCov2ProteinID =  0
RFQTL
TLKSF
SVDCT
ISSVL
common SCSs =  4
>NP_001258875.2 slit homolog 3 protein isoform 1 precursor [Homo sapiens]
 >SarsCov2Spike_Specifiedy_by_Mizuno-san
 humanProteinID =  14491 , srsCov2ProteinID =  0
PQGFS
SNNSI
DSLSS
LGKLQ
common SCSs =  4
>NP_001264044.1 dynein heavy chain 11, axonemal [Homo sapiens]
 >SarsCov2Spike_Specifiedy_by_Mizuno-san
 humanProteinID =  14717 , srsCov2ProteinID =  0
SVLYN
SNVFQ
RRARS
ALNTL
common SCSs =  4
>NP_001264992.1 SKI family transcriptional corepressor 2 isoform 1 [Homo sapiens]
 >SarsCov2Spike_Specifiedy_by_Mizuno-san
 humanProteinID =  14800 , srsCov2ProteinID =  0
AGAAA
AGSTP
SFGGV
GAGAA
common SCSs =  4
>NP_001265401.1 protein MON2 homolog isoform 5 [Homo sapiens]
 >SarsCov2Spike_Specifiedy_by_Mizuno-san
 humanProteinID =  15053 , srsCov2ProteinID =  0
SQPFL
SVLND
ILSRL
LDKVE
common SCSs =  4
>NP_001265845.1 elastin isoform j precursor [Homo sapiens]
 >SarsCov2Spike_Specifiedy_by_Mizuno-san
 humanProteinID =  15267 , srsCov2ProteinID =  0
AGAAA
TGTGV
FGAGA
GAGAA
common SCSs =  4
>NP_001268661.1 solute carrier family 26 member 6 isoform 5 [Homo sapiens]
 >SarsCov2Spike_Specifiedy_by_Mizuno-san
 humanProteinID =  15429 , srsCov2ProteinID =  0
KVFRS
VFRSS
ALLAG
GAISS
common SCSs =  4
>NP_001268662.1 solute carrier family 26 member 6 isoform 6 [Homo sapiens]
 >SarsCov2Spike_Specifiedy_by_Mizuno-san
 humanProteinID =  15430 , srsCov2ProteinID =  0
KVFRS
VFRSS
ALLAG
GAISS
common SCSs =  4
>NP_001268668.1 FH1/FH2 domain-containing protein 3 isoform 2 [Homo sapiens]
 >SarsCov2Spike_Specifiedy_by_Mizuno-san
 humanProteinID =  15436 , srsCov2ProteinID =  0
GLTVL
LTVLP
TVLPP
DVDLG
common SCSs =  4
>NP_001271174.1 signal-induced proliferation-associated 1-like protein 1 isoform 2 [Homo sapiens]
 >SarsCov2Spike_Specifiedy_by_Mizuno-san
 humanProteinID =  16239 , srsCov2ProteinID =  0
SASFS
QAGST
AGSTP
DSLSS
common SCSs =  4
>NP_001271175.1 signal-induced proliferation-associated 1-like protein 1 isoform 3 [Homo sapiens]
 >SarsCov2Spike_Specifiedy_by_Mizuno-san
 humanProteinID =  16240 , srsCov2ProteinID =  0
SASFS
QAGST
AGSTP
DSLSS
common SCSs =  4
>NP_001271176.1 signal-induced proliferation-associated 1-like protein 1 isoform 4 [Homo sapiens]
 >SarsCov2Spike_Specifiedy_by_Mizuno-san
 humanProteinID =  16241 , srsCov2ProteinID =  0
SASFS
QAGST
AGSTP
DSLSS
common SCSs =  4
>NP_001271230.1 anillin isoform 2 [Homo sapiens]
 >SarsCov2Spike_Specifiedy_by_Mizuno-san
 humanProteinID =  16285 , srsCov2ProteinID =  0
SKTQS
KTQSL
ANLAA
NLAAT
common SCSs =  4
>NP_001271231.1 anillin isoform 3 [Homo sapiens]
 >SarsCov2Spike_Specifiedy_by_Mizuno-san
 humanProteinID =  16286 , srsCov2ProteinID =  0
SKTQS
KTQSL
ANLAA
NLAAT
common SCSs =  4
>NP_001273135.1 centrosomal protein of 162 kDa isoform b [Homo sapiens]
 >SarsCov2Spike_Specifiedy_by_Mizuno-san
 humanProteinID =  16528 , srsCov2ProteinID =  0
TLDSK
DLEGK
TGTGV
IQKEI
common SCSs =  4
>NP_001273171.1 general transcription factor 3C polypeptide 1 isoform 2 [Homo sapiens]
 >SarsCov2Spike_Specifiedy_by_Mizuno-san
 humanProteinID =  16548 , srsCov2ProteinID =  0
FSALE
NGLTV
RASAN
ASANL
common SCSs =  4
>NP_001273424.1 protein FAM214A isoform 2 [Homo sapiens]
 >SarsCov2Spike_Specifiedy_by_Mizuno-san
 humanProteinID =  16674 , srsCov2ProteinID =  0
KVFRS
VFRSS
TLKSF
LGDIS
common SCSs =  4
>NP_001273685.1 anaphase-promoting complex subunit 4 isoform 1 [Homo sapiens]
 >SarsCov2Spike_Specifiedy_by_Mizuno-san
 humanProteinID =  16849 , srsCov2ProteinID =  0
AGAAA
SNLLL
PELDS
GLIAI
common SCSs =  4
>NP_001275918.1 1-phosphatidylinositol 4,5-bisphosphate phosphodiesterase epsilon-1 isoform 3 [Homo sapiens]
 >SarsCov2Spike_Specifiedy_by_Mizuno-san
 humanProteinID =  17410 , srsCov2ProteinID =  0
VADYS
RQIAP
AKNLN
LIDLQ
common SCSs =  4
>NP_001276916.1 filamin-A-interacting protein 1 isoform 1 [Homo sapiens]
 >SarsCov2Spike_Specifiedy_by_Mizuno-san
 humanProteinID =  17672 , srsCov2ProteinID =  0
RSSVL
LKSFT
KSFTV
DYSVL
common SCSs =  4
>NP_001277192.1 dedicator of cytokinesis protein 10 isoform 2 [Homo sapiens]
 >SarsCov2Spike_Specifiedy_by_Mizuno-san
 humanProteinID =  17801 , srsCov2ProteinID =  0
HRSYL
NTSNQ
VNNTV
KYEQY
common SCSs =  4
>NP_001277223.2 sorbin and SH3 domain-containing protein 1 isoform 8 [Homo sapiens]
 >SarsCov2Spike_Specifiedy_by_Mizuno-san
 humanProteinID =  17813 , srsCov2ProteinID =  0
STQDL
FNFNG
RSVAS
DIAAR
common SCSs =  4
>NP_001277236.1 catenin alpha-1 isoform 2 [Homo sapiens]
 >SarsCov2Spike_Specifiedy_by_Mizuno-san
 humanProteinID =  17819 , srsCov2ProteinID =  0
LEPLV
TDAVD
VSGNC
SGNCD
common SCSs =  4
>NP_001277250.1 dmX-like protein 1 isoform 1 [Homo sapiens]
 >SarsCov2Spike_Specifiedy_by_Mizuno-san
 humanProteinID =  17826 , srsCov2ProteinID =  0
GEVFN
GLTVL
LAGTI
LNESL
common SCSs =  4
>NP_001278744.1 hemicentin-2 precursor [Homo sapiens]
 >SarsCov2Spike_Specifiedy_by_Mizuno-san
 humanProteinID =  18022 , srsCov2ProteinID =  0
LPLVS
LADAG
SALLA
GAGAA
common SCSs =  4
>NP_001278938.1 protein eyes shut homolog isoform 4 precursor [Homo sapiens]
 >SarsCov2Spike_Specifiedy_by_Mizuno-san
 humanProteinID =  18135 , srsCov2ProteinID =  0
TQSLL
GSFCT
TITSG
TSGWT
common SCSs =  4
>NP_001278972.1 histone-lysine N-methyltransferase SETD5 isoform 2 [Homo sapiens]
 >SarsCov2Spike_Specifiedy_by_Mizuno-san
 humanProteinID =  18155 , srsCov2ProteinID =  0
STGSN
GDIAA
AARDL
SLSST
common SCSs =  4
>NP_001280569.1 WASH complex subunit 4 isoform 1 [Homo sapiens]
 >SarsCov2Spike_Specifiedy_by_Mizuno-san
 humanProteinID =  18235 , srsCov2ProteinID =  0
LKPFE
GGVSV
MTKTS
TKTSV
common SCSs =  4
>NP_001284538.1 mitogen-activated protein kinase kinase kinase 6 isoform 2 [Homo sapiens]
 >SarsCov2Spike_Specifiedy_by_Mizuno-san
 humanProteinID =  18350 , srsCov2ProteinID =  0
VLLPL
LLPLV
AGSTP
SGINA
common SCSs =  4
>NP_001287795.1 filamin-A-interacting protein 1 isoform 3 [Homo sapiens]
 >SarsCov2Spike_Specifiedy_by_Mizuno-san
 humanProteinID =  18612 , srsCov2ProteinID =  0
RSSVL
LKSFT
KSFTV
DYSVL
common SCSs =  4
>NP_001288655.1 transcription factor-like 5 protein isoform 2 [Homo sapiens]
 >SarsCov2Spike_Specifiedy_by_Mizuno-san
 humanProteinID =  18907 , srsCov2ProteinID =  0
AGAAA
LVKNK
SALLA
GAGAA
common SCSs =  4
>NP_001295051.1 solute carrier family 22 member 5 isoform a [Homo sapiens]
 >SarsCov2Spike_Specifiedy_by_Mizuno-san
 humanProteinID =  19815 , srsCov2ProteinID =  0
LLLQY
SSTAS
DVDLG
MVTIM
common SCSs =  4
>NP_001304677.1 matrilin-2 isoform c precursor [Homo sapiens]
 >SarsCov2Spike_Specifiedy_by_Mizuno-san
 humanProteinID =  20486 , srsCov2ProteinID =  0
QPTES
LLQYG
LQYGS
NFSQI
common SCSs =  4
>NP_001305169.1 nuclear receptor coactivator 6 isoform 1 [Homo sapiens]
 >SarsCov2Spike_Specifiedy_by_Mizuno-san
 humanProteinID =  20782 , srsCov2ProteinID =  0
LDSKT
LPQGF
LQPRT
VPAQE
common SCSs =  4
>NP_001305174.1 unconventional myosin-XVIIIb isoform 1 [Homo sapiens]
 >SarsCov2Spike_Specifiedy_by_Mizuno-san
 humanProteinID =  20786 , srsCov2ProteinID =  0
TVEKG
LPDPS
GFIKQ
SSVLN
common SCSs =  4
>NP_001305710.1 A disintegrin and metalloproteinase with thrombospondin motifs 9 isoform 4 precursor [Homo sapiens]
 >SarsCov2Spike_Specifiedy_by_Mizuno-san
 humanProteinID =  20979 , srsCov2ProteinID =  0
LVRDL
CGKGY
QIITT
IITTD
common SCSs =  4
>NP_001305733.1 neuronal PAS domain-containing protein 4 isoform 2 [Homo sapiens]
 >SarsCov2Spike_Specifiedy_by_Mizuno-san
 humanProteinID =  21001 , srsCov2ProteinID =  0
TLLAL
DQLTP
IDRLI
EIDRL
common SCSs =  4
>NP_001306913.1 Fanconi anemia group D2 protein isoform b [Homo sapiens]
 >SarsCov2Spike_Specifiedy_by_Mizuno-san
 humanProteinID =  21380 , srsCov2ProteinID =  0
EKSNI
LDITP
STASA
KQLSS
common SCSs =  4
>NP_001307395.1 palmitoyltransferase ZDHHC23 isoform a [Homo sapiens]
 >SarsCov2Spike_Specifiedy_by_Mizuno-san
 humanProteinID =  21560 , srsCov2ProteinID =  0
LVLLP
LLALH
LALHR
VFLHV
common SCSs =  4
>NP_001307396.1 palmitoyltransferase ZDHHC23 isoform a [Homo sapiens]
 >SarsCov2Spike_Specifiedy_by_Mizuno-san
 humanProteinID =  21561 , srsCov2ProteinID =  0
LVLLP
LLALH
LALHR
VFLHV
common SCSs =  4
>NP_001307397.1 palmitoyltransferase ZDHHC23 isoform b [Homo sapiens]
 >SarsCov2Spike_Specifiedy_by_Mizuno-san
 humanProteinID =  21562 , srsCov2ProteinID =  0
LVLLP
LLALH
LALHR
VFLHV
common SCSs =  4
>NP_001308780.1 thyroid receptor-interacting protein 11 isoform 2 [Homo sapiens]
 >SarsCov2Spike_Specifiedy_by_Mizuno-san
 humanProteinID =  22493 , srsCov2ProteinID =  0
QTLLA
LQSLQ
EELDK
ELDKY
common SCSs =  4
>NP_001309405.1 Hermansky-Pudlak syndrome 1 protein isoform a [Homo sapiens]
 >SarsCov2Spike_Specifiedy_by_Mizuno-san
 humanProteinID =  23003 , srsCov2ProteinID =  0
LLALH
SPRRA
PRRAR
RRARS
common SCSs =  4
>NP_001309406.1 Hermansky-Pudlak syndrome 1 protein isoform a [Homo sapiens]
 >SarsCov2Spike_Specifiedy_by_Mizuno-san
 humanProteinID =  23004 , srsCov2ProteinID =  0
LLALH
SPRRA
PRRAR
RRARS
common SCSs =  4
>NP_001309409.1 Hermansky-Pudlak syndrome 1 protein isoform g [Homo sapiens]
 >SarsCov2Spike_Specifiedy_by_Mizuno-san
 humanProteinID =  23007 , srsCov2ProteinID =  0
LLALH
SPRRA
PRRAR
RRARS
common SCSs =  4
>NP_001309410.1 Hermansky-Pudlak syndrome 1 protein isoform g [Homo sapiens]
 >SarsCov2Spike_Specifiedy_by_Mizuno-san
 humanProteinID =  23008 , srsCov2ProteinID =  0
LLALH
SPRRA
PRRAR
RRARS
common SCSs =  4
>NP_001309412.1 Hermansky-Pudlak syndrome 1 protein isoform i [Homo sapiens]
 >SarsCov2Spike_Specifiedy_by_Mizuno-san
 humanProteinID =  23010 , srsCov2ProteinID =  0
LLALH
SPRRA
PRRAR
RRARS
common SCSs =  4
>NP_001309413.1 Hermansky-Pudlak syndrome 1 protein isoform i [Homo sapiens]
 >SarsCov2Spike_Specifiedy_by_Mizuno-san
 humanProteinID =  23011 , srsCov2ProteinID =  0
LLALH
SPRRA
PRRAR
RRARS
common SCSs =  4
>NP_001316559.1 pleckstrin homology domain-containing family A member 7 isoform 1 [Homo sapiens]
 >SarsCov2Spike_Specifiedy_by_Mizuno-san
 humanProteinID =  24240 , srsCov2ProteinID =  0
RKSNL
SPRRA
PRRAR
LQTYV
common SCSs =  4
>NP_001316560.1 pleckstrin homology domain-containing family A member 7 isoform 3 [Homo sapiens]
 >SarsCov2Spike_Specifiedy_by_Mizuno-san
 humanProteinID =  24241 , srsCov2ProteinID =  0
RKSNL
SPRRA
PRRAR
LQTYV
common SCSs =  4
>NP_001317003.1 WASH complex subunit 2C isoform 4 [Homo sapiens]
 >SarsCov2Spike_Specifiedy_by_Mizuno-san
 humanProteinID =  24452 , srsCov2ProteinID =  0
SKPSK
IGKIQ
PDVDL
EPVLK
common SCSs =  4
>NP_001317958.1 protein phosphatase 1 regulatory subunit 12B isoform h [Homo sapiens]
 >SarsCov2Spike_Specifiedy_by_Mizuno-san
 humanProteinID =  25108 , srsCov2ProteinID =  0
RSSVL
RSYLT
SYLTP
ENQKL
common SCSs =  4
>NP_001333208.1 RNA polymerase-associated protein CTR9 homolog isoform 2 [Homo sapiens]
 >SarsCov2Spike_Specifiedy_by_Mizuno-san
 humanProteinID =  25404 , srsCov2ProteinID =  0
AAYYV
KSNLK
ISVTT
VFAQV
common SCSs =  4
>NP_001333799.1 baculoviral IAP repeat-containing protein 1 isoform 1 [Homo sapiens]
 >SarsCov2Spike_Specifiedy_by_Mizuno-san
 humanProteinID =  25657 , srsCov2ProteinID =  0
SLSST
LDSFK
AKNLN
KNLNE
common SCSs =  4
>NP_001336168.1 dmX-like protein 1 isoform 1 [Homo sapiens]
 >SarsCov2Spike_Specifiedy_by_Mizuno-san
 humanProteinID =  26511 , srsCov2ProteinID =  0
GEVFN
GLTVL
LAGTI
LNESL
common SCSs =  4
>NP_001336380.1 histone-lysine N-methyltransferase SETD5 isoform 2 [Homo sapiens]
 >SarsCov2Spike_Specifiedy_by_Mizuno-san
 humanProteinID =  26700 , srsCov2ProteinID =  0
STGSN
GDIAA
AARDL
SLSST
common SCSs =  4
>NP_001336991.1 protein TANC1 isoform 3 [Homo sapiens]
 >SarsCov2Spike_Specifiedy_by_Mizuno-san
 humanProteinID =  27061 , srsCov2ProteinID =  0
TRAGC
KRSFI
RSFIE
FPREG
common SCSs =  4
>NP_001337338.1 dyslexia-associated protein KIAA0319 isoform i [Homo sapiens]
 >SarsCov2Spike_Specifiedy_by_Mizuno-san
 humanProteinID =  27254 , srsCov2ProteinID =  0
VLLPL
LIVNN
IVNNA
KTSVD
common SCSs =  4
>NP_001337339.1 dyslexia-associated protein KIAA0319 isoform i [Homo sapiens]
 >SarsCov2Spike_Specifiedy_by_Mizuno-san
 humanProteinID =  27255 , srsCov2ProteinID =  0
VLLPL
LIVNN
IVNNA
KTSVD
common SCSs =  4
>NP_001337858.1 protein AHNAK2 isoform 2 [Homo sapiens]
 >SarsCov2Spike_Specifiedy_by_Mizuno-san
 humanProteinID =  27723 , srsCov2ProteinID =  0
SALGK
KVEAE
VEAEV
DPLQP
common SCSs =  4
>NP_001338622.1 pleckstrin homology domain-containing family G member 2 isoform 2 [Homo sapiens]
 >SarsCov2Spike_Specifiedy_by_Mizuno-san
 humanProteinID =  28373 , srsCov2ProteinID =  0
SLSST
RASAN
LQELG
QELGK
common SCSs =  4
>NP_001341214.1 signal-induced proliferation-associated 1-like protein 1 isoform 1 [Homo sapiens]
 >SarsCov2Spike_Specifiedy_by_Mizuno-san
 humanProteinID =  30249 , srsCov2ProteinID =  0
SASFS
QAGST
AGSTP
DSLSS
common SCSs =  4
>NP_001341215.1 signal-induced proliferation-associated 1-like protein 1 isoform 3 [Homo sapiens]
 >SarsCov2Spike_Specifiedy_by_Mizuno-san
 humanProteinID =  30250 , srsCov2ProteinID =  0
SASFS
QAGST
AGSTP
DSLSS
common SCSs =  4
>NP_001341216.1 signal-induced proliferation-associated 1-like protein 1 isoform 3 [Homo sapiens]
 >SarsCov2Spike_Specifiedy_by_Mizuno-san
 humanProteinID =  30251 , srsCov2ProteinID =  0
SASFS
QAGST
AGSTP
DSLSS
common SCSs =  4
>NP_001341217.1 signal-induced proliferation-associated 1-like protein 1 isoform 3 [Homo sapiens]
 >SarsCov2Spike_Specifiedy_by_Mizuno-san
 humanProteinID =  30252 , srsCov2ProteinID =  0
SASFS
QAGST
AGSTP
DSLSS
common SCSs =  4
>NP_001341311.1 inositol hexakisphosphate and diphosphoinositol-pentakisphosphate kinase 1 isoform 7 [Homo sapiens]
 >SarsCov2Spike_Specifiedy_by_Mizuno-san
 humanProteinID =  30324 , srsCov2ProteinID =  0
DPLSE
RLFRK
DSLSS
EPQII
common SCSs =  4
>NP_001341312.1 inositol hexakisphosphate and diphosphoinositol-pentakisphosphate kinase 1 isoform 7 [Homo sapiens]
 >SarsCov2Spike_Specifiedy_by_Mizuno-san
 humanProteinID =  30325 , srsCov2ProteinID =  0
DPLSE
RLFRK
DSLSS
EPQII
common SCSs =  4
>NP_001341313.1 inositol hexakisphosphate and diphosphoinositol-pentakisphosphate kinase 1 isoform 7 [Homo sapiens]
 >SarsCov2Spike_Specifiedy_by_Mizuno-san
 humanProteinID =  30326 , srsCov2ProteinID =  0
DPLSE
RLFRK
DSLSS
EPQII
common SCSs =  4
>NP_001341314.1 inositol hexakisphosphate and diphosphoinositol-pentakisphosphate kinase 1 isoform 7 [Homo sapiens]
 >SarsCov2Spike_Specifiedy_by_Mizuno-san
 humanProteinID =  30327 , srsCov2ProteinID =  0
DPLSE
RLFRK
DSLSS
EPQII
common SCSs =  4
>NP_001341315.1 inositol hexakisphosphate and diphosphoinositol-pentakisphosphate kinase 1 isoform 7 [Homo sapiens]
 >SarsCov2Spike_Specifiedy_by_Mizuno-san
 humanProteinID =  30328 , srsCov2ProteinID =  0
DPLSE
RLFRK
DSLSS
EPQII
common SCSs =  4
>NP_001341316.1 inositol hexakisphosphate and diphosphoinositol-pentakisphosphate kinase 1 isoform 8 [Homo sapiens]
 >SarsCov2Spike_Specifiedy_by_Mizuno-san
 humanProteinID =  30329 , srsCov2ProteinID =  0
DPLSE
RLFRK
DSLSS
EPQII
common SCSs =  4
>NP_001341317.1 inositol hexakisphosphate and diphosphoinositol-pentakisphosphate kinase 1 isoform 8 [Homo sapiens]
 >SarsCov2Spike_Specifiedy_by_Mizuno-san
 humanProteinID =  30330 , srsCov2ProteinID =  0
DPLSE
RLFRK
DSLSS
EPQII
common SCSs =  4
>NP_001341318.1 inositol hexakisphosphate and diphosphoinositol-pentakisphosphate kinase 1 isoform 8 [Homo sapiens]
 >SarsCov2Spike_Specifiedy_by_Mizuno-san
 humanProteinID =  30331 , srsCov2ProteinID =  0
DPLSE
RLFRK
DSLSS
EPQII
common SCSs =  4
>NP_001341319.1 inositol hexakisphosphate and diphosphoinositol-pentakisphosphate kinase 1 isoform 2 [Homo sapiens]
 >SarsCov2Spike_Specifiedy_by_Mizuno-san
 humanProteinID =  30332 , srsCov2ProteinID =  0
DPLSE
RLFRK
DSLSS
EPQII
common SCSs =  4
>NP_001341320.1 inositol hexakisphosphate and diphosphoinositol-pentakisphosphate kinase 1 isoform 2 [Homo sapiens]
 >SarsCov2Spike_Specifiedy_by_Mizuno-san
 humanProteinID =  30333 , srsCov2ProteinID =  0
DPLSE
RLFRK
DSLSS
EPQII
common SCSs =  4
>NP_001341321.1 inositol hexakisphosphate and diphosphoinositol-pentakisphosphate kinase 1 isoform 2 [Homo sapiens]
 >SarsCov2Spike_Specifiedy_by_Mizuno-san
 humanProteinID =  30334 , srsCov2ProteinID =  0
DPLSE
RLFRK
DSLSS
EPQII
common SCSs =  4
>NP_001341322.1 inositol hexakisphosphate and diphosphoinositol-pentakisphosphate kinase 1 isoform 9 [Homo sapiens]
 >SarsCov2Spike_Specifiedy_by_Mizuno-san
 humanProteinID =  30335 , srsCov2ProteinID =  0
DPLSE
RLFRK
DSLSS
EPQII
common SCSs =  4
>NP_001341323.1 inositol hexakisphosphate and diphosphoinositol-pentakisphosphate kinase 1 isoform 10 [Homo sapiens]
 >SarsCov2Spike_Specifiedy_by_Mizuno-san
 humanProteinID =  30336 , srsCov2ProteinID =  0
DPLSE
RLFRK
DSLSS
EPQII
common SCSs =  4
>NP_001341324.1 inositol hexakisphosphate and diphosphoinositol-pentakisphosphate kinase 1 isoform 11 [Homo sapiens]
 >SarsCov2Spike_Specifiedy_by_Mizuno-san
 humanProteinID =  30337 , srsCov2ProteinID =  0
DPLSE
RLFRK
DSLSS
EPQII
common SCSs =  4
>NP_001341325.1 inositol hexakisphosphate and diphosphoinositol-pentakisphosphate kinase 1 isoform 11 [Homo sapiens]
 >SarsCov2Spike_Specifiedy_by_Mizuno-san
 humanProteinID =  30338 , srsCov2ProteinID =  0
DPLSE
RLFRK
DSLSS
EPQII
common SCSs =  4
>NP_001341326.1 inositol hexakisphosphate and diphosphoinositol-pentakisphosphate kinase 1 isoform 11 [Homo sapiens]
 >SarsCov2Spike_Specifiedy_by_Mizuno-san
 humanProteinID =  30339 , srsCov2ProteinID =  0
DPLSE
RLFRK
DSLSS
EPQII
common SCSs =  4
>NP_001341407.1 roquin-2 isoform 3 [Homo sapiens]
 >SarsCov2Spike_Specifiedy_by_Mizuno-san
 humanProteinID =  30407 , srsCov2ProteinID =  0
PLVSS
EILDI
AENSV
VNNTV
common SCSs =  4
>NP_001341411.1 roquin-2 isoform 5 [Homo sapiens]
 >SarsCov2Spike_Specifiedy_by_Mizuno-san
 humanProteinID =  30411 , srsCov2ProteinID =  0
PLVSS
EILDI
AENSV
VNNTV
common SCSs =  4
>NP_001350691.1 dedicator of cytokinesis protein 10 isoform 3 [Homo sapiens]
 >SarsCov2Spike_Specifiedy_by_Mizuno-san
 humanProteinID =  31493 , srsCov2ProteinID =  0
HRSYL
NTSNQ
VNNTV
KYEQY
common SCSs =  4
>NP_001350881.1 palmitoyltransferase ZDHHC23 isoform d [Homo sapiens]
 >SarsCov2Spike_Specifiedy_by_Mizuno-san
 humanProteinID =  31614 , srsCov2ProteinID =  0
LVLLP
LLALH
LALHR
VFLHV
common SCSs =  4
>NP_001351095.1 glutamate receptor 1 isoform 9 [Homo sapiens]
 >SarsCov2Spike_Specifiedy_by_Mizuno-san
 humanProteinID =  31692 , srsCov2ProteinID =  0
NLDSK
KVGGN
YTSAL
ANLAA
common SCSs =  4
>NP_001351096.1 glutamate receptor 1 isoform 10 [Homo sapiens]
 >SarsCov2Spike_Specifiedy_by_Mizuno-san
 humanProteinID =  31693 , srsCov2ProteinID =  0
NLDSK
KVGGN
YTSAL
ANLAA
common SCSs =  4
>NP_001352054.1 nuclear pore complex protein Nup98-Nup96 isoform 5 [Homo sapiens]
 >SarsCov2Spike_Specifiedy_by_Mizuno-san
 humanProteinID =  31988 , srsCov2ProteinID =  0
GCVIA
GTNTS
LLTDE
ALLAG
common SCSs =  4
>NP_001352056.1 nuclear pore complex protein Nup98-Nup96 isoform 7 precursor [Homo sapiens]
 >SarsCov2Spike_Specifiedy_by_Mizuno-san
 humanProteinID =  31990 , srsCov2ProteinID =  0
GCVIA
GTNTS
LLTDE
ALLAG
common SCSs =  4
>NP_001352057.1 nuclear pore complex protein Nup98-Nup96 isoform 8 precursor [Homo sapiens]
 >SarsCov2Spike_Specifiedy_by_Mizuno-san
 humanProteinID =  31991 , srsCov2ProteinID =  0
GCVIA
GTNTS
LLTDE
ALLAG
common SCSs =  4
>NP_001352058.1 nuclear pore complex protein Nup98-Nup96 isoform 9 [Homo sapiens]
 >SarsCov2Spike_Specifiedy_by_Mizuno-san
 humanProteinID =  31992 , srsCov2ProteinID =  0
GCVIA
GTNTS
LLTDE
ALLAG
common SCSs =  4
>NP_001352217.1 putative short-chain dehydrogenase/reductase family 42E member 2 [Homo sapiens]
 >SarsCov2Spike_Specifiedy_by_Mizuno-san
 humanProteinID =  32040 , srsCov2ProteinID =  0
AGSTP
ADQLT
LPPLL
PPLLT
common SCSs =  4
>NP_001352613.1 histone-lysine N-methyltransferase, H3 lysine-36 specific isoform a [Homo sapiens]
 >SarsCov2Spike_Specifiedy_by_Mizuno-san
 humanProteinID =  32168 , srsCov2ProteinID =  0
LVSSQ
KDFGG
SKPSK
PELDS
common SCSs =  4
>NP_001352622.1 maltase-glucoamylase, intestinal isoform 1 [Homo sapiens]
 >SarsCov2Spike_Specifiedy_by_Mizuno-san
 humanProteinID =  32173 , srsCov2ProteinID =  0
FTRGV
YQTSN
QILPD
KRSFI
common SCSs =  4
>NP_001352957.1 dynein heavy chain 12, axonemal isoform 4 [Homo sapiens]
 >SarsCov2Spike_Specifiedy_by_Mizuno-san
 humanProteinID =  32325 , srsCov2ProteinID =  0
PLVSS
FLMDL
LSETK
KNLNE
common SCSs =  4
>NP_001353346.1 histone-lysine N-methyltransferase SETDB1 isoform 4 [Homo sapiens]
 >SarsCov2Spike_Specifiedy_by_Mizuno-san
 humanProteinID =  32571 , srsCov2ProteinID =  0
LTGTG
ILDIT
IYKTP
STASA
common SCSs =  4
>NP_001353347.1 histone-lysine N-methyltransferase SETDB1 isoform 4 [Homo sapiens]
 >SarsCov2Spike_Specifiedy_by_Mizuno-san
 humanProteinID =  32572 , srsCov2ProteinID =  0
LTGTG
ILDIT
IYKTP
STASA
common SCSs =  4
>NP_001354324.1 WASH complex subunit 2C isoform 7 [Homo sapiens]
 >SarsCov2Spike_Specifiedy_by_Mizuno-san
 humanProteinID =  32903 , srsCov2ProteinID =  0
SKPSK
IGKIQ
PDVDL
EPVLK
common SCSs =  4
>NP_001354325.1 WASH complex subunit 2C isoform 8 [Homo sapiens]
 >SarsCov2Spike_Specifiedy_by_Mizuno-san
 humanProteinID =  32904 , srsCov2ProteinID =  0
SKPSK
IGKIQ
PDVDL
EPVLK
common SCSs =  4
>NP_001354326.1 WASH complex subunit 2C isoform 9 [Homo sapiens]
 >SarsCov2Spike_Specifiedy_by_Mizuno-san
 humanProteinID =  32905 , srsCov2ProteinID =  0
SKPSK
IGKIQ
PDVDL
EPVLK
common SCSs =  4
>NP_001354332.1 WASH complex subunit 2C isoform 14 [Homo sapiens]
 >SarsCov2Spike_Specifiedy_by_Mizuno-san
 humanProteinID =  32911 , srsCov2ProteinID =  0
SKPSK
IGKIQ
PDVDL
EPVLK
common SCSs =  4
>NP_001354333.1 WASH complex subunit 2C isoform 15 [Homo sapiens]
 >SarsCov2Spike_Specifiedy_by_Mizuno-san
 humanProteinID =  32912 , srsCov2ProteinID =  0
SKPSK
IGKIQ
PDVDL
EPVLK
common SCSs =  4
>NP_001354340.1 WASH complex subunit 2C isoform 19 [Homo sapiens]
 >SarsCov2Spike_Specifiedy_by_Mizuno-san
 humanProteinID =  32919 , srsCov2ProteinID =  0
SKPSK
IGKIQ
PDVDL
EPVLK
common SCSs =  4
>NP_001354878.1 protocadherin Fat 3 isoform 1 precursor [Homo sapiens]
 >SarsCov2Spike_Specifiedy_by_Mizuno-san
 humanProteinID =  33286 , srsCov2ProteinID =  0
DSSSG
SLSST
LSSTA
MVTIM
common SCSs =  4
>NP_001354908.1 doublecortin domain-containing protein 1 isoform 4 [Homo sapiens]
 >SarsCov2Spike_Specifiedy_by_Mizuno-san
 humanProteinID =  33301 , srsCov2ProteinID =  0
VSMTK
SMTKT
FDEDD
DEDDS
common SCSs =  4
>NP_001356324.1 receptor-type tyrosine-protein phosphatase zeta isoform 4 precursor [Homo sapiens]
 >SarsCov2Spike_Specifiedy_by_Mizuno-san
 humanProteinID =  33624 , srsCov2ProteinID =  0
SASFS
ASFST
AVLYQ
SQILP
common SCSs =  4
>NP_001356325.1 receptor-type tyrosine-protein phosphatase zeta isoform 5 [Homo sapiens]
 >SarsCov2Spike_Specifiedy_by_Mizuno-san
 humanProteinID =  33625 , srsCov2ProteinID =  0
SASFS
ASFST
AVLYQ
SQILP
common SCSs =  4
>NP_001356418.1 arf-GAP with Rho-GAP domain, ANK repeat and PH domain-containing protein 1 isoform e [Homo sapiens]
 >SarsCov2Spike_Specifiedy_by_Mizuno-san
 humanProteinID =  33713 , srsCov2ProteinID =  0
TLEIL
LEILD
EIRAS
EELDK
common SCSs =  4
>NP_001356735.1 homeodomain-interacting protein kinase 1 isoform 1 [Homo sapiens]
 >SarsCov2Spike_Specifiedy_by_Mizuno-san
 humanProteinID =  33990 , srsCov2ProteinID =  0
GCVIA
QPYRV
VSVIT
ILSRL
common SCSs =  4
>NP_001356736.1 homeodomain-interacting protein kinase 1 isoform 5 [Homo sapiens]
 >SarsCov2Spike_Specifiedy_by_Mizuno-san
 humanProteinID =  33991 , srsCov2ProteinID =  0
GCVIA
QPYRV
VSVIT
ILSRL
common SCSs =  4
>NP_001357082.1 WD repeat- and FYVE domain-containing protein 4 isoform 2 [Homo sapiens]
 >SarsCov2Spike_Specifiedy_by_Mizuno-san
 humanProteinID =  34178 , srsCov2ProteinID =  0
STQDL
QSLLI
EDDSE
DDSEP
common SCSs =  4
>NP_001357225.1 fibroblast growth factor receptor-like 1 precursor [Homo sapiens]
 >SarsCov2Spike_Specifiedy_by_Mizuno-san
 humanProteinID =  34304 , srsCov2ProteinID =  0
DSSSG
LTVLP
LPPLL
VVIGI
common SCSs =  4
>NP_001358116.1 protein unc-13 homolog B isoform 4 [Homo sapiens]
 >SarsCov2Spike_Specifiedy_by_Mizuno-san
 humanProteinID =  34710 , srsCov2ProteinID =  0
LPLVS
VRDLP
VLPPL
ALQIP
common SCSs =  4
>NP_001358118.1 protein unc-13 homolog B isoform 6 [Homo sapiens]
 >SarsCov2Spike_Specifiedy_by_Mizuno-san
 humanProteinID =  34712 , srsCov2ProteinID =  0
LPLVS
VRDLP
VLPPL
IITTD
common SCSs =  4
>NP_001358857.1 AT-hook DNA-binding motif-containing protein 1 [Homo sapiens]
 >SarsCov2Spike_Specifiedy_by_Mizuno-san
 humanProteinID =  35073 , srsCov2ProteinID =  0
ALEPL
ALDPL
PSKRS
FKEEL
common SCSs =  4
>NP_001361.1 dynein heavy chain 6, axonemal [Homo sapiens]
 >SarsCov2Spike_Specifiedy_by_Mizuno-san
 humanProteinID =  35181 , srsCov2ProteinID =  0
NPVLP
SALEP
DFGGF
PSKRS
common SCSs =  4
>NP_001361182.1 Fanconi anemia group D2 protein isoform c [Homo sapiens]
 >SarsCov2Spike_Specifiedy_by_Mizuno-san
 humanProteinID =  35186 , srsCov2ProteinID =  0
EKSNI
LDITP
STASA
KQLSS
common SCSs =  4
>NP_001361183.1 Fanconi anemia group D2 protein isoform d [Homo sapiens]
 >SarsCov2Spike_Specifiedy_by_Mizuno-san
 humanProteinID =  35187 , srsCov2ProteinID =  0
EKSNI
LDITP
STASA
KQLSS
common SCSs =  4
>NP_001361651.1 dystonin isoform 6 [Homo sapiens]
 >SarsCov2Spike_Specifiedy_by_Mizuno-san
 humanProteinID =  35355 , srsCov2ProteinID =  0
FLVLL
TEKSN
LDKVE
AGLIA
common SCSs =  4
>NP_001361663.1 dystonin isoform 5 [Homo sapiens]
 >SarsCov2Spike_Specifiedy_by_Mizuno-san
 humanProteinID =  35358 , srsCov2ProteinID =  0
FLVLL
TEKSN
LDKVE
AGLIA
common SCSs =  4
>NP_001361665.1 dystonin isoform 4 [Homo sapiens]
 >SarsCov2Spike_Specifiedy_by_Mizuno-san
 humanProteinID =  35359 , srsCov2ProteinID =  0
FLVLL
TEKSN
LDKVE
AGLIA
common SCSs =  4
>NP_001362356.1 multiple PDZ domain protein isoform 8 [Homo sapiens]
 >SarsCov2Spike_Specifiedy_by_Mizuno-san
 humanProteinID =  35540 , srsCov2ProteinID =  0
TISVT
FSQIL
QDVVN
GVFVS
common SCSs =  4
>NP_001364250.1 ATP-binding cassette sub-family A member 10 [Homo sapiens]
 >SarsCov2Spike_Specifiedy_by_Mizuno-san
 humanProteinID =  37110 , srsCov2ProteinID =  0
SLLIV
LLIVN
LIVNN
IVNNT
common SCSs =  4
>NP_001365929.3 glutamate receptor 2 isoform 4 [Homo sapiens]
 >SarsCov2Spike_Specifiedy_by_Mizuno-san
 humanProteinID =  37898 , srsCov2ProteinID =  0
NLDSK
KVGGN
YTSAL
ANLAA
common SCSs =  4
>NP_001365930.3 glutamate receptor 2 isoform 3 [Homo sapiens]
 >SarsCov2Spike_Specifiedy_by_Mizuno-san
 humanProteinID =  37899 , srsCov2ProteinID =  0
NLDSK
KVGGN
YTSAL
ANLAA
common SCSs =  4
>NP_001366174.1 neurobeachin isoform 3 [Homo sapiens]
 >SarsCov2Spike_Specifiedy_by_Mizuno-san
 humanProteinID =  37954 , srsCov2ProteinID =  0
FRVYS
RVYST
VNQNA
DEDDS
common SCSs =  4
>NP_001366540.1 glutamyl aminopeptidase isoform 2 [Homo sapiens]
 >SarsCov2Spike_Specifiedy_by_Mizuno-san
 humanProteinID =  38055 , srsCov2ProteinID =  0
RSSVL
KRISN
LPVSM
SSTAS
common SCSs =  4
>NP_001371380.1 sorbin and SH3 domain-containing protein 1 isoform 30 [Homo sapiens]
 >SarsCov2Spike_Specifiedy_by_Mizuno-san
 humanProteinID =  38874 , srsCov2ProteinID =  0
STQDL
PGDSS
FNFNG
DIAAR
common SCSs =  4
>NP_001371382.1 sorbin and SH3 domain-containing protein 1 isoform 32 [Homo sapiens]
 >SarsCov2Spike_Specifiedy_by_Mizuno-san
 humanProteinID =  38876 , srsCov2ProteinID =  0
STQDL
PGDSS
FNFNG
DIAAR
common SCSs =  4
>NP_001371383.1 sorbin and SH3 domain-containing protein 1 isoform 32 [Homo sapiens]
 >SarsCov2Spike_Specifiedy_by_Mizuno-san
 humanProteinID =  38877 , srsCov2ProteinID =  0
STQDL
PGDSS
FNFNG
DIAAR
common SCSs =  4
>NP_001371560.1 dipeptidyl peptidase 9 isoform 10 [Homo sapiens]
 >SarsCov2Spike_Specifiedy_by_Mizuno-san
 humanProteinID =  39045 , srsCov2ProteinID =  0
GAGAA
AGAAL
GAALQ
QLIRA
common SCSs =  4
>NP_001371661.1 ciliogenesis and planar polarity effector 1 isoform 1 [Homo sapiens]
 >SarsCov2Spike_Specifiedy_by_Mizuno-san
 humanProteinID =  39144 , srsCov2ProteinID =  0
NLCPF
VLPPL
ENQKL
CVLGQ
common SCSs =  4
>NP_001371941.1 neurobeachin isoform 4 [Homo sapiens]
 >SarsCov2Spike_Specifiedy_by_Mizuno-san
 humanProteinID =  39401 , srsCov2ProteinID =  0
FRVYS
RVYST
VNQNA
DEDDS
common SCSs =  4
>NP_001371942.1 protein FAM214A isoform 1 [Homo sapiens]
 >SarsCov2Spike_Specifiedy_by_Mizuno-san
 humanProteinID =  39402 , srsCov2ProteinID =  0
KVFRS
VFRSS
TLKSF
LGDIS
common SCSs =  4
>NP_001371943.1 protein FAM214A isoform 1 [Homo sapiens]
 >SarsCov2Spike_Specifiedy_by_Mizuno-san
 humanProteinID =  39403 , srsCov2ProteinID =  0
KVFRS
VFRSS
TLKSF
LGDIS
common SCSs =  4
>NP_001371944.1 protein FAM214A isoform 1 [Homo sapiens]
 >SarsCov2Spike_Specifiedy_by_Mizuno-san
 humanProteinID =  39404 , srsCov2ProteinID =  0
KVFRS
VFRSS
TLKSF
LGDIS
common SCSs =  4
>NP_001371945.1 protein FAM214A isoform 1 [Homo sapiens]
 >SarsCov2Spike_Specifiedy_by_Mizuno-san
 humanProteinID =  39405 , srsCov2ProteinID =  0
KVFRS
VFRSS
TLKSF
LGDIS
common SCSs =  4
>NP_001371946.1 protein FAM214A isoform 1 [Homo sapiens]
 >SarsCov2Spike_Specifiedy_by_Mizuno-san
 humanProteinID =  39406 , srsCov2ProteinID =  0
KVFRS
VFRSS
TLKSF
LGDIS
common SCSs =  4
>NP_001371947.1 protein FAM214A isoform 1 [Homo sapiens]
 >SarsCov2Spike_Specifiedy_by_Mizuno-san
 humanProteinID =  39407 , srsCov2ProteinID =  0
KVFRS
VFRSS
TLKSF
LGDIS
common SCSs =  4
>NP_001371948.1 protein FAM214A isoform 3 [Homo sapiens]
 >SarsCov2Spike_Specifiedy_by_Mizuno-san
 humanProteinID =  39408 , srsCov2ProteinID =  0
KVFRS
VFRSS
TLKSF
LGDIS
common SCSs =  4
>NP_001371949.1 protein FAM214A isoform 4 [Homo sapiens]
 >SarsCov2Spike_Specifiedy_by_Mizuno-san
 humanProteinID =  39409 , srsCov2ProteinID =  0
KVFRS
VFRSS
TLKSF
LGDIS
common SCSs =  4
>NP_001371950.1 protein FAM214A isoform 5 [Homo sapiens]
 >SarsCov2Spike_Specifiedy_by_Mizuno-san
 humanProteinID =  39410 , srsCov2ProteinID =  0
KVFRS
VFRSS
TLKSF
LGDIS
common SCSs =  4
>NP_001371951.1 protein FAM214A isoform 6 [Homo sapiens]
 >SarsCov2Spike_Specifiedy_by_Mizuno-san
 humanProteinID =  39411 , srsCov2ProteinID =  0
KVFRS
VFRSS
TLKSF
LGDIS
common SCSs =  4
>NP_001371952.1 protein FAM214A isoform 6 [Homo sapiens]
 >SarsCov2Spike_Specifiedy_by_Mizuno-san
 humanProteinID =  39412 , srsCov2ProteinID =  0
KVFRS
VFRSS
TLKSF
LGDIS
common SCSs =  4
>NP_001372593.1 microtubule-associated protein 4 isoform 9 [Homo sapiens]
 >SarsCov2Spike_Specifiedy_by_Mizuno-san
 humanProteinID =  39995 , srsCov2ProteinID =  0
PLSET
SPTKL
KPSKR
PSKRS
common SCSs =  4
>NP_001372611.1 microtubule-associated protein 4 isoform 6 [Homo sapiens]
 >SarsCov2Spike_Specifiedy_by_Mizuno-san
 humanProteinID =  40012 , srsCov2ProteinID =  0
PLSET
SPTKL
KPSKR
PSKRS
common SCSs =  4
>NP_001372616.1 microtubule-associated protein 4 isoform 2 [Homo sapiens]
 >SarsCov2Spike_Specifiedy_by_Mizuno-san
 humanProteinID =  40017 , srsCov2ProteinID =  0
PLSET
SPTKL
KPSKR
PSKRS
common SCSs =  4
>NP_001372617.1 microtubule-associated protein 4 isoform 8 [Homo sapiens]
 >SarsCov2Spike_Specifiedy_by_Mizuno-san
 humanProteinID =  40018 , srsCov2ProteinID =  0
PLSET
SPTKL
KPSKR
PSKRS
common SCSs =  4
>NP_001372618.1 microtubule-associated protein 4 isoform 7 [Homo sapiens]
 >SarsCov2Spike_Specifiedy_by_Mizuno-san
 humanProteinID =  40019 , srsCov2ProteinID =  0
PLSET
SPTKL
KPSKR
PSKRS
common SCSs =  4
>NP_001511.2 general transcription factor 3C polypeptide 1 isoform 1 [Homo sapiens]
 >SarsCov2Spike_Specifiedy_by_Mizuno-san
 humanProteinID =  40631 , srsCov2ProteinID =  0
FSALE
NGLTV
RASAN
ASANL
common SCSs =  4
>NP_001914.3 DNA damage-binding protein 1 [Homo sapiens]
 >SarsCov2Spike_Specifiedy_by_Mizuno-san
 humanProteinID =  40992 , srsCov2ProteinID =  0
SFELL
FELLH
LDITP
LGAEN
common SCSs =  4
>NP_002281.3 laminin subunit alpha-4 isoform 2 precursor [Homo sapiens]
 >SarsCov2Spike_Specifiedy_by_Mizuno-san
 humanProteinID =  41344 , srsCov2ProteinID =  0
RSVAS
GGFNF
SLSST
LSSTA
common SCSs =  4
>NP_002283.3 laminin subunit beta-2 precursor [Homo sapiens]
 >SarsCov2Spike_Specifiedy_by_Mizuno-san
 humanProteinID =  41346 , srsCov2ProteinID =  0
LVLLP
GSTPC
RRARS
ALGKL
common SCSs =  4
>NP_002371.3 matrilin-2 isoform a precursor [Homo sapiens]
 >SarsCov2Spike_Specifiedy_by_Mizuno-san
 humanProteinID =  41418 , srsCov2ProteinID =  0
QPTES
LLQYG
LQYGS
NFSQI
common SCSs =  4
>NP_002448.4 mucin-2 precursor [Homo sapiens]
 >SarsCov2Spike_Specifiedy_by_Mizuno-san
 humanProteinID =  41493 , srsCov2ProteinID =  0
NNCTF
NFNGL
DPSKP
PSKPS
common SCSs =  4
>NP_002472.2 protein phosphatase 1 regulatory subunit 12B isoform a [Homo sapiens]
 >SarsCov2Spike_Specifiedy_by_Mizuno-san
 humanProteinID =  41515 , srsCov2ProteinID =  0
RSSVL
RSYLT
SYLTP
ENQKL
common SCSs =  4
>NP_002842.2 receptor-type tyrosine-protein phosphatase zeta isoform 1 precursor [Homo sapiens]
 >SarsCov2Spike_Specifiedy_by_Mizuno-san
 humanProteinID =  41865 , srsCov2ProteinID =  0
SASFS
ASFST
AVLYQ
SQILP
common SCSs =  4
>NP_003051.1 solute carrier family 22 member 5 isoform b [Homo sapiens]
 >SarsCov2Spike_Specifiedy_by_Mizuno-san
 humanProteinID =  42066 , srsCov2ProteinID =  0
LLLQY
SSTAS
DVDLG
MVTIM
common SCSs =  4
>NP_003053.2 slit homolog 3 protein isoform 2 precursor [Homo sapiens]
 >SarsCov2Spike_Specifiedy_by_Mizuno-san
 humanProteinID =  42068 , srsCov2ProteinID =  0
PQGFS
SNNSI
DSLSS
LGKLQ
common SCSs =  4
>NP_003480.2 nuclear receptor-interacting protein 1 [Homo sapiens]
 >SarsCov2Spike_Specifiedy_by_Mizuno-san
 humanProteinID =  42453 , srsCov2ProteinID =  0
TQSLL
PPLLT
ALLAG
IDRLN
common SCSs =  4
>NP_003861.1 ras GTPase-activating-like protein IQGAP1 [Homo sapiens]
 >SarsCov2Spike_Specifiedy_by_Mizuno-san
 humanProteinID =  42810 , srsCov2ProteinID =  0
LVKNK
ALQIP
LQDVV
KQLSS
common SCSs =  4
>NP_003961.3 myomesin-2 [Homo sapiens]
 >SarsCov2Spike_Specifiedy_by_Mizuno-san
 humanProteinID =  42898 , srsCov2ProteinID =  0
ALDPL
TKTSV
HDGKA
SEPVL
common SCSs =  4
>NP_004230.2 thyroid receptor-interacting protein 11 isoform 1 [Homo sapiens]
 >SarsCov2Spike_Specifiedy_by_Mizuno-san
 humanProteinID =  43139 , srsCov2ProteinID =  0
QTLLA
LQSLQ
EELDK
ELDKY
common SCSs =  4
>NP_004362.2 coatomer subunit alpha isoform 2 [Homo sapiens]
 >SarsCov2Spike_Specifiedy_by_Mizuno-san
 humanProteinID =  43259 , srsCov2ProteinID =  0
KLNDL
TTDAV
QSIIA
SIIAY
common SCSs =  4
>NP_004376.2 versican core protein isoform 1 precursor [Homo sapiens]
 >SarsCov2Spike_Specifiedy_by_Mizuno-san
 humanProteinID =  43272 , srsCov2ProteinID =  0
DYSVL
LSSTA
DSFKE
KYFKN
common SCSs =  4
>NP_004516.2 low-density lipoprotein receptor-related protein 2 precursor [Homo sapiens]
 >SarsCov2Spike_Specifiedy_by_Mizuno-san
 humanProteinID =  43406 , srsCov2ProteinID =  0
ESEFR
IDGYF
TVEKG
CTQLN
common SCSs =  4
>NP_004527.2 baculoviral IAP repeat-containing protein 1 isoform 1 [Homo sapiens]
 >SarsCov2Spike_Specifiedy_by_Mizuno-san
 humanProteinID =  43416 , srsCov2ProteinID =  0
SLSST
LDSFK
AKNLN
KNLNE
common SCSs =  4
>NP_004534.3 nebulin isoform 3 [Homo sapiens]
 >SarsCov2Spike_Specifiedy_by_Mizuno-san
 humanProteinID =  43423 , srsCov2ProteinID =  0
ISSVL
RAAEI
SGINA
GINAS
common SCSs =  4
>NP_004659.2 maltase-glucoamylase, intestinal isoform 2 [Homo sapiens]
 >SarsCov2Spike_Specifiedy_by_Mizuno-san
 humanProteinID =  43539 , srsCov2ProteinID =  0
FTRGV
YQTSN
QILPD
KRSFI
common SCSs =  4
>NP_004663.3 mitogen-activated protein kinase kinase kinase 6 isoform 1 [Homo sapiens]
 >SarsCov2Spike_Specifiedy_by_Mizuno-san
 humanProteinID =  43543 , srsCov2ProteinID =  0
VLLPL
LLPLV
AGSTP
SGINA
common SCSs =  4
>NP_004738.3 disks large homolog 5 [Homo sapiens]
 >SarsCov2Spike_Specifiedy_by_Mizuno-san
 humanProteinID =  43612 , srsCov2ProteinID =  0
PPLLT
PLLTD
LSSTA
LQSLQ
common SCSs =  4
>NP_004810.2 symplekin [Homo sapiens]
 >SarsCov2Spike_Specifiedy_by_Mizuno-san
 humanProteinID =  43680 , srsCov2ProteinID =  0
RSVAS
SVASQ
KLIAN
ILSRL
common SCSs =  4
>NP_005236.2 protocadherin Fat 1 precursor [Homo sapiens]
 >SarsCov2Spike_Specifiedy_by_Mizuno-san
 humanProteinID =  44068 , srsCov2ProteinID =  0
VFRSS
SGTNG
SLSST
LSSTA
common SCSs =  4
>NP_005372.2 nucleolin [Homo sapiens]
 >SarsCov2Spike_Specifiedy_by_Mizuno-san
 humanProteinID =  44193 , srsCov2ProteinID =  0
VSPTK
NKVTL
AAEIR
EDDSE
common SCSs =  4
>NP_005553.2 laminin subunit gamma-2 isoform a precursor [Homo sapiens]
 >SarsCov2Spike_Specifiedy_by_Mizuno-san
 humanProteinID =  44362 , srsCov2ProteinID =  0
KNLRE
NLREF
DSLSS
SGNCD
common SCSs =  4
>NP_005843.2 chromodomain-helicase-DNA-binding protein 3 isoform 2 [Homo sapiens]
 >SarsCov2Spike_Specifiedy_by_Mizuno-san
 humanProteinID =  44621 , srsCov2ProteinID =  0
LVRDL
LPPLL
ILSRL
PVLKG
common SCSs =  4
>NP_006120.1 bone morphogenetic protein 1 isoform 3 precursor [Homo sapiens]
 >SarsCov2Spike_Specifiedy_by_Mizuno-san
 humanProteinID =  44871 , srsCov2ProteinID =  0
LGDIA
GTITS
EDDSE
DDSEP
common SCSs =  4
>NP_006280.3 talin-1 [Homo sapiens]
 >SarsCov2Spike_Specifiedy_by_Mizuno-san
 humanProteinID =  45019 , srsCov2ProteinID =  0
PKKST
SLGAE
IAARD
ASVVN
common SCSs =  4
>NP_006303.4 nuclear receptor corepressor 2 isoform 1 [Homo sapiens]
 >SarsCov2Spike_Specifiedy_by_Mizuno-san
 humanProteinID =  45042 , srsCov2ProteinID =  0
AAAYY
AGSTP
LTESN
EELDK
common SCSs =  4
>NP_006593.2 transcription factor-like 5 protein isoform 1 [Homo sapiens]
 >SarsCov2Spike_Specifiedy_by_Mizuno-san
 humanProteinID =  45309 , srsCov2ProteinID =  0
AGAAA
LVKNK
SALLA
GAGAA
common SCSs =  4
>NP_015564.5 glutamate receptor 3 isoform 1 precursor [Homo sapiens]
 >SarsCov2Spike_Specifiedy_by_Mizuno-san
 humanProteinID =  45932 , srsCov2ProteinID =  0
NLDSK
KVGGN
YTSAL
ANLAA
common SCSs =  4
>NP_036564.3 histone-lysine N-methyltransferase SETDB1 isoform 2 [Homo sapiens]
 >SarsCov2Spike_Specifiedy_by_Mizuno-san
 humanProteinID =  46290 , srsCov2ProteinID =  0
LTGTG
ILDIT
IYKTP
STASA
common SCSs =  4
>NP_036565.2 splicing factor 3B subunit 1 isoform 1 [Homo sapiens]
 >SarsCov2Spike_Specifiedy_by_Mizuno-san
 humanProteinID =  46291 , srsCov2ProteinID =  0
TEILP
TPPIK
PPIKD
ASALG
common SCSs =  4
>NP_037499.2 anaphase-promoting complex subunit 4 isoform 2 [Homo sapiens]
 >SarsCov2Spike_Specifiedy_by_Mizuno-san
 humanProteinID =  46457 , srsCov2ProteinID =  0
AGAAA
SNLLL
PELDS
GLIAI
common SCSs =  4
>NP_054790.2 nuclear receptor coactivator 6 isoform 1 [Homo sapiens]
 >SarsCov2Spike_Specifiedy_by_Mizuno-san
 humanProteinID =  46621 , srsCov2ProteinID =  0
LDSKT
LPQGF
LQPRT
VPAQE
common SCSs =  4
>NP_055043.2 sodium-dependent proline transporter [Homo sapiens]
 >SarsCov2Spike_Specifiedy_by_Mizuno-san
 humanProteinID =  46698 , srsCov2ProteinID =  0
TLLAL
GAGAA
AALQI
LKGVK
common SCSs =  4
>NP_055426.1 midasin [Homo sapiens]
 >SarsCov2Spike_Specifiedy_by_Mizuno-san
 humanProteinID =  47005 , srsCov2ProteinID =  0
LLALH
LNRAL
KPSKR
AISSV
common SCSs =  4
>NP_055448.1 RNA polymerase-associated protein CTR9 homolog isoform 1 [Homo sapiens]
 >SarsCov2Spike_Specifiedy_by_Mizuno-san
 humanProteinID =  47026 , srsCov2ProteinID =  0
AAYYV
KSNLK
ISVTT
VFAQV
common SCSs =  4
>NP_055474.3 inositol hexakisphosphate and diphosphoinositol-pentakisphosphate kinase 1 isoform 2 [Homo sapiens]
 >SarsCov2Spike_Specifiedy_by_Mizuno-san
 humanProteinID =  47047 , srsCov2ProteinID =  0
DPLSE
RLFRK
DSLSS
EPQII
common SCSs =  4
>NP_055504.2 dedicator of cytokinesis protein 10 isoform 1 [Homo sapiens]
 >SarsCov2Spike_Specifiedy_by_Mizuno-san
 humanProteinID =  47075 , srsCov2ProteinID =  0
HRSYL
NTSNQ
VNNTV
KYEQY
common SCSs =  4
>NP_055596.3 RB1-inducible coiled-coil protein 1 isoform 1 [Homo sapiens]
 >SarsCov2Spike_Specifiedy_by_Mizuno-san
 humanProteinID =  47161 , srsCov2ProteinID =  0
LVSSQ
GDSSS
LFRKS
SFCTQ
common SCSs =  4
>NP_055616.3 pecanex-like protein 2 isoform 1 [Homo sapiens]
 >SarsCov2Spike_Specifiedy_by_Mizuno-san
 humanProteinID =  47178 , srsCov2ProteinID =  0
TTLDS
TLLAL
QDSLS
DSLSS
common SCSs =  4
>NP_055710.2 centrosomal protein of 162 kDa isoform a [Homo sapiens]
 >SarsCov2Spike_Specifiedy_by_Mizuno-san
 humanProteinID =  47263 , srsCov2ProteinID =  0
TLDSK
DLEGK
TGTGV
IQKEI
common SCSs =  4
>NP_055718.4 neuron navigator 3 isoform 2 [Homo sapiens]
 >SarsCov2Spike_Specifiedy_by_Mizuno-san
 humanProteinID =  47270 , srsCov2ProteinID =  0
TITSG
TGRLQ
GRLQS
RLQSL
common SCSs =  4
>NP_055807.1 disheveled-associated activator of morphogenesis 1 isoform 1 [Homo sapiens]
 >SarsCov2Spike_Specifiedy_by_Mizuno-san
 humanProteinID =  47351 , srsCov2ProteinID =  0
TRFQT
RFQTL
NRKRI
RLQSL
common SCSs =  4
>NP_055872.4 E3 ubiquitin-protein ligase MYCBP2 [Homo sapiens]
 >SarsCov2Spike_Specifiedy_by_Mizuno-san
 humanProteinID =  47403 , srsCov2ProteinID =  0
NGTIT
TASAL
ASALG
RLDKV
common SCSs =  4
>NP_055907.3 serine/threonine-protein kinase SMG1 [Homo sapiens]
 >SarsCov2Spike_Specifiedy_by_Mizuno-san
 humanProteinID =  47434 , srsCov2ProteinID =  0
AVRDP
LLLQY
LVKQL
VYDPL
common SCSs =  4
>NP_056057.2 arf-GAP with Rho-GAP domain, ANK repeat and PH domain-containing protein 1 isoform a [Homo sapiens]
 >SarsCov2Spike_Specifiedy_by_Mizuno-san
 humanProteinID =  47556 , srsCov2ProteinID =  0
TLEIL
LEILD
EIRAS
EELDK
common SCSs =  4
>NP_056090.1 WASH complex subunit 4 isoform 2 [Homo sapiens]
 >SarsCov2Spike_Specifiedy_by_Mizuno-san
 humanProteinID =  47585 , srsCov2ProteinID =  0
LKPFE
GGVSV
MTKTS
TKTSV
common SCSs =  4
>NP_056140.1 little elongation complex subunit 1 [Homo sapiens]
 >SarsCov2Spike_Specifiedy_by_Mizuno-san
 humanProteinID =  47625 , srsCov2ProteinID =  0
VSVIT
LPPLL
QALNT
PAQEK
common SCSs =  4
>NP_056197.3 E3 ubiquitin-protein ligase HECTD1 [Homo sapiens]
 >SarsCov2Spike_Specifiedy_by_Mizuno-san
 humanProteinID =  47675 , srsCov2ProteinID =  0
LVDLP
VDLPI
PRTFL
DILSR
common SCSs =  4
>NP_056355.2 RNA polymerase II-associated protein 1 [Homo sapiens]
 >SarsCov2Spike_Specifiedy_by_Mizuno-san
 humanProteinID =  47792 , srsCov2ProteinID =  0
LVLLP
VLLPL
AGSTP
PDVDL
common SCSs =  4
>NP_056371.1 signal-induced proliferation-associated 1-like protein 1 isoform 1 [Homo sapiens]
 >SarsCov2Spike_Specifiedy_by_Mizuno-san
 humanProteinID =  47805 , srsCov2ProteinID =  0
SASFS
QAGST
AGSTP
DSLSS
common SCSs =  4
>NP_056493.3 neurobeachin isoform 1 [Homo sapiens]
 >SarsCov2Spike_Specifiedy_by_Mizuno-san
 humanProteinID =  47881 , srsCov2ProteinID =  0
FRVYS
RVYST
VNQNA
DEDDS
common SCSs =  4
>NP_056502.1 filamin-A-interacting protein 1 isoform 2 [Homo sapiens]
 >SarsCov2Spike_Specifiedy_by_Mizuno-san
 humanProteinID =  47889 , srsCov2ProteinID =  0
RSSVL
LKSFT
KSFTV
DYSVL
common SCSs =  4
>NP_056526.3 BRD4-interacting chromatin-remodeling complex-associated protein [Homo sapiens]
 >SarsCov2Spike_Specifiedy_by_Mizuno-san
 humanProteinID =  47908 , srsCov2ProteinID =  0
LPPLL
GAGAA
QDVVN
SPDVD
common SCSs =  4
>NP_057404.2 nuclear pore complex protein Nup98-Nup96 isoform 1 precursor [Homo sapiens]
 >SarsCov2Spike_Specifiedy_by_Mizuno-san
 humanProteinID =  48304 , srsCov2ProteinID =  0
GCVIA
GTNTS
LLTDE
ALLAG
common SCSs =  4
>NP_057425.3 1-phosphatidylinositol 4,5-bisphosphate phosphodiesterase epsilon-1 isoform 1 [Homo sapiens]
 >SarsCov2Spike_Specifiedy_by_Mizuno-san
 humanProteinID =  48323 , srsCov2ProteinID =  0
VADYS
RQIAP
AKNLN
LIDLQ
common SCSs =  4
>NP_059116.3 homeobox protein SIX4 [Homo sapiens]
 >SarsCov2Spike_Specifiedy_by_Mizuno-san
 humanProteinID =  48611 , srsCov2ProteinID =  0
AGAAA
RDIAD
VNQNA
NQNAQ
common SCSs =  4
>NP_060034.9 stabilin-2 precursor [Homo sapiens]
 >SarsCov2Spike_Specifiedy_by_Mizuno-san
 humanProteinID =  48699 , srsCov2ProteinID =  0
YLQPR
DVNCT
LMSFP
DPLQP
common SCSs =  4
>NP_060139.2 DNA excision repair protein ERCC-6-like isoform a [Homo sapiens]
 >SarsCov2Spike_Specifiedy_by_Mizuno-san
 humanProteinID =  48780 , srsCov2ProteinID =  0
FLMDL
KEELD
SPDVD
DEDDS
common SCSs =  4
>NP_060404.4 PH-interacting protein [Homo sapiens]
 >SarsCov2Spike_Specifiedy_by_Mizuno-san
 humanProteinID =  49007 , srsCov2ProteinID =  0
PSKRS
ALNTL
ISSVL
EDDSE
common SCSs =  4
>NP_060653.3 protein strawberry notch homolog 1 isoform 2 [Homo sapiens]
 >SarsCov2Spike_Specifiedy_by_Mizuno-san
 humanProteinID =  49210 , srsCov2ProteinID =  0
VSGTN
QQFGR
SALLA
VSNGT
common SCSs =  4
>NP_060686.3 4'-phosphopantetheine phosphatase [Homo sapiens]
 >SarsCov2Spike_Specifiedy_by_Mizuno-san
 humanProteinID =  49239 , srsCov2ProteinID =  0
PLVDL
LVDLP
LSRLD
SRLDK
common SCSs =  4
>NP_061155.2 anillin isoform 1 [Homo sapiens]
 >SarsCov2Spike_Specifiedy_by_Mizuno-san
 humanProteinID =  49541 , srsCov2ProteinID =  0
SKTQS
KTQSL
ANLAA
NLAAT
common SCSs =  4
>NP_061486.2 laminin subunit gamma-2 isoform b precursor [Homo sapiens]
 >SarsCov2Spike_Specifiedy_by_Mizuno-san
 humanProteinID =  49593 , srsCov2ProteinID =  0
KNLRE
NLREF
DSLSS
SGNCD
common SCSs =  4
>NP_062546.2 protein FAM214A isoform 1 [Homo sapiens]
 >SarsCov2Spike_Specifiedy_by_Mizuno-san
 humanProteinID =  49811 , srsCov2ProteinID =  0
KVFRS
VFRSS
TLKSF
LGDIS
common SCSs =  4
>NP_065143.2 manganese-transporting ATPase 13A1 [Homo sapiens]
 >SarsCov2Spike_Specifiedy_by_Mizuno-san
 humanProteinID =  50070 , srsCov2ProteinID =  0
VLSFE
LTVLP
AMQMA
IRAAE
common SCSs =  4
>NP_065393.1 reticulon-4 isoform A [Homo sapiens]
 >SarsCov2Spike_Specifiedy_by_Mizuno-san
 humanProteinID =  50133 , srsCov2ProteinID =  0
PLVSS
KPFER
FNGLT
DSEPV
common SCSs =  4
>NP_065815.1 caskin-1 [Homo sapiens]
 >SarsCov2Spike_Specifiedy_by_Mizuno-san
 humanProteinID =  50246 , srsCov2ProteinID =  0
GFSAL
ASANL
SANLA
SGINA
common SCSs =  4
>NP_065920.2 doublecortin domain-containing protein 1 isoform 3 [Homo sapiens]
 >SarsCov2Spike_Specifiedy_by_Mizuno-san
 humanProteinID =  50337 , srsCov2ProteinID =  0
VSMTK
SMTKT
FDEDD
DEDDS
common SCSs =  4
>NP_065973.2 serine/threonine-protein kinase WNK3 isoform 1 [Homo sapiens]
 >SarsCov2Spike_Specifiedy_by_Mizuno-san
 humanProteinID =  50375 , srsCov2ProteinID =  0
DSKTQ
SKTQS
SVAYS
FNKVT
common SCSs =  4
>NP_067628.1 carbohydrate sulfotransferase 6 precursor [Homo sapiens]
 >SarsCov2Spike_Specifiedy_by_Mizuno-san
 humanProteinID =  50656 , srsCov2ProteinID =  0
GTNGT
SSTAS
GAISS
AEIRA
common SCSs =  4
>NP_068742.2 fibroblast growth factor receptor-like 1 precursor [Homo sapiens]
 >SarsCov2Spike_Specifiedy_by_Mizuno-san
 humanProteinID =  50754 , srsCov2ProteinID =  0
DSSSG
LTVLP
LPPLL
VVIGI
common SCSs =  4
>NP_068775.1 glutamate receptor ionotropic, kainate 2 isoform 1 precursor [Homo sapiens]
 >SarsCov2Spike_Specifiedy_by_Mizuno-san
 humanProteinID =  50785 , srsCov2ProteinID =  0
ASALG
ANLAA
FVTQR
VTQRN
common SCSs =  4
>NP_071900.2 histone-lysine N-methyltransferase, H3 lysine-36 specific isoform b [Homo sapiens]
 >SarsCov2Spike_Specifiedy_by_Mizuno-san
 humanProteinID =  50994 , srsCov2ProteinID =  0
LVSSQ
KDFGG
SKPSK
PELDS
common SCSs =  4
>NP_073153.1 anaphase-promoting complex subunit 1 [Homo sapiens]
 >SarsCov2Spike_Specifiedy_by_Mizuno-san
 humanProteinID =  51066 , srsCov2ProteinID =  0
PGQTG
IAARD
AARDL
SCLKG
common SCSs =  4
>NP_073746.2 pleckstrin homology domain-containing family G member 2 isoform 1 [Homo sapiens]
 >SarsCov2Spike_Specifiedy_by_Mizuno-san
 humanProteinID =  51155 , srsCov2ProteinID =  0
SLSST
RASAN
LQELG
QELGK
common SCSs =  4
>NP_075043.1 baculoviral IAP repeat-containing protein 1 isoform 2 [Homo sapiens]
 >SarsCov2Spike_Specifiedy_by_Mizuno-san
 humanProteinID =  51171 , srsCov2ProteinID =  0
SLSST
LDSFK
AKNLN
KNLNE
common SCSs =  4
>NP_075062.2 solute carrier family 26 member 6 isoform 1 [Homo sapiens]
 >SarsCov2Spike_Specifiedy_by_Mizuno-san
 humanProteinID =  51187 , srsCov2ProteinID =  0
KVFRS
VFRSS
ALLAG
GAISS
common SCSs =  4
>NP_075561.3 ciliogenesis and planar polarity effector 1 isoform 2 [Homo sapiens]
 >SarsCov2Spike_Specifiedy_by_Mizuno-san
 humanProteinID =  51230 , srsCov2ProteinID =  0
NLCPF
VLPPL
ENQKL
CVLGQ
common SCSs =  4
>NP_078838.1 transport and Golgi organization protein 6 homolog [Homo sapiens]
 >SarsCov2Spike_Specifiedy_by_Mizuno-san
 humanProteinID =  51498 , srsCov2ProteinID =  0
DLEGK
SVTTE
GDIAA
GAGAA
common SCSs =  4
>NP_079032.2 multimerin-2 precursor [Homo sapiens]
 >SarsCov2Spike_Specifiedy_by_Mizuno-san
 humanProteinID =  51662 , srsCov2ProteinID =  0
EPLVD
TLLAL
GAGAA
LGKLQ
common SCSs =  4
>NP_079146.2 phosphatidylinositol 3,4,5-trisphosphate-dependent Rac exchanger 2 protein isoform a [Homo sapiens]
 >SarsCov2Spike_Specifiedy_by_Mizuno-san
 humanProteinID =  51752 , srsCov2ProteinID =  0
YLTPG
RTFLL
LGKLQ
PQSAP
common SCSs =  4
>NP_079216.4 dedicator of cytokinesis protein 5 isoform 1 [Homo sapiens]
 >SarsCov2Spike_Specifiedy_by_Mizuno-san
 humanProteinID =  51796 , srsCov2ProteinID =  0
VLLPL
RISNC
ISNCV
PLLTD
common SCSs =  4
>NP_079279.3 A disintegrin and metalloproteinase with thrombospondin motifs 20 preproprotein [Homo sapiens]
 >SarsCov2Spike_Specifiedy_by_Mizuno-san
 humanProteinID =  51828 , srsCov2ProteinID =  0
FGEVF
GLTGT
TPCSF
DISGI
common SCSs =  4
>NP_079411.2 FH1/FH2 domain-containing protein 3 isoform 1 [Homo sapiens]
 >SarsCov2Spike_Specifiedy_by_Mizuno-san
 humanProteinID =  51888 , srsCov2ProteinID =  0
GLTVL
LTVLP
TVLPP
DVDLG
common SCSs =  4
>NP_115928.1 SLIT and NTRK-like protein 2 precursor [Homo sapiens]
 >SarsCov2Spike_Specifiedy_by_Mizuno-san
 humanProteinID =  52826 , srsCov2ProteinID =  0
ADYNY
LQYGS
LQSLQ
IDLQE
common SCSs =  4
>NP_115971.2 ubiquitin carboxyl-terminal hydrolase 32 [Homo sapiens]
 >SarsCov2Spike_Specifiedy_by_Mizuno-san
 humanProteinID =  52857 , srsCov2ProteinID =  0
IIRGW
CSFGG
SSVLN
EKNFT
common SCSs =  4
>NP_115997.5 unconventional myosin-XVIIIb isoform 2 [Homo sapiens]
 >SarsCov2Spike_Specifiedy_by_Mizuno-san
 humanProteinID =  52879 , srsCov2ProteinID =  0
TVEKG
LPDPS
GFIKQ
SSVLN
common SCSs =  4
>NP_116171.3 hepatitis A virus cellular receptor 2 precursor [Homo sapiens]
 >SarsCov2Spike_Specifiedy_by_Mizuno-san
 humanProteinID =  52956 , srsCov2ProteinID =  0
IGAGI
GAGIC
AGICA
VTLAD
common SCSs =  4
>NP_116750.1 protocadherin-11 X-linked isoform c precursor [Homo sapiens]
 >SarsCov2Spike_Specifiedy_by_Mizuno-san
 humanProteinID =  53091 , srsCov2ProteinID =  0
ALHRS
AGTIT
AQEKN
DNTFV
common SCSs =  4
>NP_116751.1 protocadherin-11 X-linked isoform d precursor [Homo sapiens]
 >SarsCov2Spike_Specifiedy_by_Mizuno-san
 humanProteinID =  53092 , srsCov2ProteinID =  0
ALHRS
AGTIT
AQEKN
DNTFV
common SCSs =  4
>NP_116755.1 protocadherin-11 Y-linked isoform c precursor [Homo sapiens]
 >SarsCov2Spike_Specifiedy_by_Mizuno-san
 humanProteinID =  53096 , srsCov2ProteinID =  0
ALHRS
AGTIT
AQEKN
DNTFV
common SCSs =  4
>NP_149075.2 Fanconi anemia group D2 protein isoform a [Homo sapiens]
 >SarsCov2Spike_Specifiedy_by_Mizuno-san
 humanProteinID =  53174 , srsCov2ProteinID =  0
EKSNI
LDITP
STASA
KQLSS
common SCSs =  4
>NP_208384.3 helicase with zinc finger domain 2 isoform 2 [Homo sapiens]
 >SarsCov2Spike_Specifiedy_by_Mizuno-san
 humanProteinID =  53381 , srsCov2ProteinID =  0
AGAAA
RVVVL
VVVLS
RRARS
common SCSs =  4
>NP_277045.1 protein dispatched homolog 2 [Homo sapiens]
 >SarsCov2Spike_Specifiedy_by_Mizuno-san
 humanProteinID =  53439 , srsCov2ProteinID =  0
LLALH
LALHR
GDSSS
TVYDP
common SCSs =  4
>NP_443080.1 coiled-coil domain-containing protein 97 isoform 1 [Homo sapiens]
 >SarsCov2Spike_Specifiedy_by_Mizuno-san
 humanProteinID =  53507 , srsCov2ProteinID =  0
SNLLL
NLLLQ
DKVEA
YEQYI
common SCSs =  4
>NP_525021.3 ATP-binding cassette sub-family A member 10 [Homo sapiens]
 >SarsCov2Spike_Specifiedy_by_Mizuno-san
 humanProteinID =  53792 , srsCov2ProteinID =  0
SLLIV
LLIVN
LIVNN
IVNNT
common SCSs =  4
>NP_596870.2 titin isoform novex-3 [Homo sapiens]
 >SarsCov2Spike_Specifiedy_by_Mizuno-san
 humanProteinID =  54160 , srsCov2ProteinID =  0
VLPFN
AGAAA
ASFST
LQDVV
common SCSs =  4
>NP_599025.2 solute carrier family 26 member 6 isoform 2 [Homo sapiens]
 >SarsCov2Spike_Specifiedy_by_Mizuno-san
 humanProteinID =  54235 , srsCov2ProteinID =  0
KVFRS
VFRSS
ALLAG
GAISS
common SCSs =  4
>NP_602298.2 solute carrier family 26 member 6 isoform 3 [Homo sapiens]
 >SarsCov2Spike_Specifiedy_by_Mizuno-san
 humanProteinID =  54247 , srsCov2ProteinID =  0
KVFRS
VFRSS
ALLAG
GAISS
common SCSs =  4
>NP_612429.2 protein AHNAK2 isoform 1 [Homo sapiens]
 >SarsCov2Spike_Specifiedy_by_Mizuno-san
 humanProteinID =  54365 , srsCov2ProteinID =  0
SALGK
KVEAE
VEAEV
DPLQP
common SCSs =  4
>NP_624358.2 nuclear pore complex protein Nup98-Nup96 isoform 4 [Homo sapiens]
 >SarsCov2Spike_Specifiedy_by_Mizuno-san
 humanProteinID =  54638 , srsCov2ProteinID =  0
GCVIA
GTNTS
LLTDE
ALLAG
common SCSs =  4
>NP_653091.3 kinetochore scaffold 1 isoform 2 [Homo sapiens]
 >SarsCov2Spike_Specifiedy_by_Mizuno-san
 humanProteinID =  54739 , srsCov2ProteinID =  0
ADTTD
VKQIY
LQELG
QELGK
common SCSs =  4
>NP_653273.3 otoancorin isoform 1 precursor [Homo sapiens]
 >SarsCov2Spike_Specifiedy_by_Mizuno-san
 humanProteinID =  54836 , srsCov2ProteinID =  0
SEFRV
ALLAG
LQSLQ
LQELG
common SCSs =  4
>NP_660093.2 neuron navigator 2 isoform 2 [Homo sapiens]
 >SarsCov2Spike_Specifiedy_by_Mizuno-san
 humanProteinID =  55004 , srsCov2ProteinID =  0
MDLEG
TISVT
FNFSQ
RLQSL
common SCSs =  4
>NP_689594.4 xin actin-binding repeat-containing protein 2 isoform 1 [Homo sapiens]
 >SarsCov2Spike_Specifiedy_by_Mizuno-san
 humanProteinID =  55471 , srsCov2ProteinID =  0
FQTLL
PTESI
STECS
DSLSS
common SCSs =  4
>NP_689705.2 coiled-coil domain-containing protein 27 [Homo sapiens]
 >SarsCov2Spike_Specifiedy_by_Mizuno-san
 humanProteinID =  55566 , srsCov2ProteinID =  0
TQDLF
QDLFL
SVASQ
VASQS
common SCSs =  4
>NP_689909.2 homeodomain-interacting protein kinase 1 isoform 2 [Homo sapiens]
 >SarsCov2Spike_Specifiedy_by_Mizuno-san
 humanProteinID =  55715 , srsCov2ProteinID =  0
GCVIA
QPYRV
VSVIT
ILSRL
common SCSs =  4
>NP_694941.2 kinesin-like protein KIF19 [Homo sapiens]
 >SarsCov2Spike_Specifiedy_by_Mizuno-san
 humanProteinID =  55910 , srsCov2ProteinID =  0
PGDSS
IAQYT
AQYTS
EVQID
common SCSs =  4
>NP_705833.3 very large A-kinase anchor protein [Homo sapiens]
 >SarsCov2Spike_Specifiedy_by_Mizuno-san
 humanProteinID =  56060 , srsCov2ProteinID =  0
NNLDS
LPDPS
TFVSG
FDEDD
common SCSs =  4
>NP_733468.3 kinetochore scaffold 1 isoform 1 [Homo sapiens]
 >SarsCov2Spike_Specifiedy_by_Mizuno-san
 humanProteinID =  56166 , srsCov2ProteinID =  0
ADTTD
VKQIY
LQELG
QELGK
common SCSs =  4
>NP_733764.1 otoancorin isoform 2 [Homo sapiens]
 >SarsCov2Spike_Specifiedy_by_Mizuno-san
 humanProteinID =  56176 , srsCov2ProteinID =  0
SEFRV
ALLAG
LQSLQ
LQELG
common SCSs =  4
>NP_758859.1 histone-lysine N-methyltransferase, H3 lysine-36 specific isoform a [Homo sapiens]
 >SarsCov2Spike_Specifiedy_by_Mizuno-san
 humanProteinID =  56362 , srsCov2ProteinID =  0
LVSSQ
KDFGG
SKPSK
PELDS
common SCSs =  4
>NP_775839.3 uromodulin-like 1 isoform 2 precursor [Homo sapiens]
 >SarsCov2Spike_Specifiedy_by_Mizuno-san
 humanProteinID =  56559 , srsCov2ProteinID =  0
VIRGD
KSNLK
LGDIA
SNGTH
common SCSs =  4
>NP_775841.2 palmitoyltransferase ZDHHC23 isoform c [Homo sapiens]
 >SarsCov2Spike_Specifiedy_by_Mizuno-san
 humanProteinID =  56561 , srsCov2ProteinID =  0
LVLLP
LLALH
LALHR
VFLHV
common SCSs =  4
>NP_778228.3 pleckstrin homology domain-containing family A member 7 isoform 2 [Homo sapiens]
 >SarsCov2Spike_Specifiedy_by_Mizuno-san
 humanProteinID =  56785 , srsCov2ProteinID =  0
RKSNL
SPRRA
PRRAR
LQTYV
common SCSs =  4
>NP_786944.1 glutamate receptor ionotropic, kainate 2 isoform 2 precursor [Homo sapiens]
 >SarsCov2Spike_Specifiedy_by_Mizuno-san
 humanProteinID =  56852 , srsCov2ProteinID =  0
ASALG
ANLAA
FVTQR
VTQRN
common SCSs =  4
>NP_803875.2 fibrocystin-L precursor [Homo sapiens]
 >SarsCov2Spike_Specifiedy_by_Mizuno-san
 humanProteinID =  56996 , srsCov2ProteinID =  0
GINIT
NLVKN
ISVTT
ANQFN
common SCSs =  4
>NP_821075.1 stAR-related lipid transfer protein 13 isoform 2 [Homo sapiens]
 >SarsCov2Spike_Specifiedy_by_Mizuno-san
 humanProteinID =  57055 , srsCov2ProteinID =  0
PLVSS
SSVLH
LFRKS
TEIYQ
common SCSs =  4
>NP_835260.2 PDZ domain-containing protein 2 [Homo sapiens]
 >SarsCov2Spike_Specifiedy_by_Mizuno-san
 humanProteinID =  57087 , srsCov2ProteinID =  0
SPRRA
KTSVD
GDSTE
PDPSK
common SCSs =  4
>NP_849195.2 neuronal PAS domain-containing protein 4 isoform 1 [Homo sapiens]
 >SarsCov2Spike_Specifiedy_by_Mizuno-san
 humanProteinID =  57271 , srsCov2ProteinID =  0
TLLAL
DQLTP
IDRLI
EIDRL
common SCSs =  4
>NP_891550.1 A disintegrin and metalloproteinase with thrombospondin motifs 9 isoform 1 preproprotein [Homo sapiens]
 >SarsCov2Spike_Specifiedy_by_Mizuno-san
 humanProteinID =  57796 , srsCov2ProteinID =  0
LVRDL
CGKGY
QIITT
IITTD
common SCSs =  4
>NP_892009.3 neuron navigator 2 isoform 1 [Homo sapiens]
 >SarsCov2Spike_Specifiedy_by_Mizuno-san
 humanProteinID =  57814 , srsCov2ProteinID =  0
MDLEG
TISVT
FNFSQ
RLQSL
common SCSs =  4
>NP_937762.2 laminin subunit alpha-3 isoform 1 precursor [Homo sapiens]
 >SarsCov2Spike_Specifiedy_by_Mizuno-san
 humanProteinID =  58054 , srsCov2ProteinID =  0
LVLLP
EKGIY
SASFS
DLQEL
common SCSs =  4
>NP_938009.1 homeodomain-interacting protein kinase 1 isoform 1 [Homo sapiens]
 >SarsCov2Spike_Specifiedy_by_Mizuno-san
 humanProteinID =  58118 , srsCov2ProteinID =  0
GCVIA
QPYRV
VSVIT
ILSRL
common SCSs =  4
>NP_940890.4 protein FAM83H [Homo sapiens]
 >SarsCov2Spike_Specifiedy_by_Mizuno-san
 humanProteinID =  58225 , srsCov2ProteinID =  0
AGAAA
PDDFT
DSKVG
GDSTE
common SCSs =  4
>XP_005245084.1 protein PRRC2C isoform X15 [Homo sapiens]
 >SarsCov2Spike_Specifiedy_by_Mizuno-san
 humanProteinID =  59323 , srsCov2ProteinID =  0
VSQPF
VLNDI
LGDIS
GDISG
common SCSs =  4
>XP_005245085.1 protein PRRC2C isoform X16 [Homo sapiens]
 >SarsCov2Spike_Specifiedy_by_Mizuno-san
 humanProteinID =  59324 , srsCov2ProteinID =  0
VSQPF
VLNDI
LGDIS
GDISG
common SCSs =  4
>XP_005245086.1 protein PRRC2C isoform X17 [Homo sapiens]
 >SarsCov2Spike_Specifiedy_by_Mizuno-san
 humanProteinID =  59325 , srsCov2ProteinID =  0
VSQPF
VLNDI
LGDIS
GDISG
common SCSs =  4
>XP_005245905.1 AT-hook DNA-binding motif-containing protein 1 isoform X1 [Homo sapiens]
 >SarsCov2Spike_Specifiedy_by_Mizuno-san
 humanProteinID =  59512 , srsCov2ProteinID =  0
ALEPL
ALDPL
PSKRS
FKEEL
common SCSs =  4
>XP_005245906.1 AT-hook DNA-binding motif-containing protein 1 isoform X1 [Homo sapiens]
 >SarsCov2Spike_Specifiedy_by_Mizuno-san
 humanProteinID =  59513 , srsCov2ProteinID =  0
ALEPL
ALDPL
PSKRS
FKEEL
common SCSs =  4
>XP_005245907.1 AT-hook DNA-binding motif-containing protein 1 isoform X1 [Homo sapiens]
 >SarsCov2Spike_Specifiedy_by_Mizuno-san
 humanProteinID =  59514 , srsCov2ProteinID =  0
ALEPL
ALDPL
PSKRS
FKEEL
common SCSs =  4
>XP_005245908.1 AT-hook DNA-binding motif-containing protein 1 isoform X1 [Homo sapiens]
 >SarsCov2Spike_Specifiedy_by_Mizuno-san
 humanProteinID =  59515 , srsCov2ProteinID =  0
ALEPL
ALDPL
PSKRS
FKEEL
common SCSs =  4
>XP_005245909.1 AT-hook DNA-binding motif-containing protein 1 isoform X1 [Homo sapiens]
 >SarsCov2Spike_Specifiedy_by_Mizuno-san
 humanProteinID =  59516 , srsCov2ProteinID =  0
ALEPL
ALDPL
PSKRS
FKEEL
common SCSs =  4
>XP_005246647.1 nebulin isoform X1 [Homo sapiens]
 >SarsCov2Spike_Specifiedy_by_Mizuno-san
 humanProteinID =  59665 , srsCov2ProteinID =  0
ISSVL
RAAEI
SGINA
GINAS
common SCSs =  4
>XP_005246648.1 nebulin isoform X2 [Homo sapiens]
 >SarsCov2Spike_Specifiedy_by_Mizuno-san
 humanProteinID =  59666 , srsCov2ProteinID =  0
ISSVL
RAAEI
SGINA
GINAS
common SCSs =  4
>XP_005246649.1 nebulin isoform X5 [Homo sapiens]
 >SarsCov2Spike_Specifiedy_by_Mizuno-san
 humanProteinID =  59667 , srsCov2ProteinID =  0
ISSVL
RAAEI
SGINA
GINAS
common SCSs =  4
>XP_005246650.1 nebulin isoform X3 [Homo sapiens]
 >SarsCov2Spike_Specifiedy_by_Mizuno-san
 humanProteinID =  59668 , srsCov2ProteinID =  0
ISSVL
RAAEI
SGINA
GINAS
common SCSs =  4
>XP_005246651.1 nebulin isoform X4 [Homo sapiens]
 >SarsCov2Spike_Specifiedy_by_Mizuno-san
 humanProteinID =  59669 , srsCov2ProteinID =  0
ISSVL
RAAEI
SGINA
GINAS
common SCSs =  4
>XP_005246653.1 nebulin isoform X7 [Homo sapiens]
 >SarsCov2Spike_Specifiedy_by_Mizuno-san
 humanProteinID =  59670 , srsCov2ProteinID =  0
ISSVL
RAAEI
SGINA
GINAS
common SCSs =  4
>XP_005246654.1 nebulin isoform X9 [Homo sapiens]
 >SarsCov2Spike_Specifiedy_by_Mizuno-san
 humanProteinID =  59671 , srsCov2ProteinID =  0
ISSVL
RAAEI
SGINA
GINAS
common SCSs =  4
>XP_005246655.1 nebulin isoform X10 [Homo sapiens]
 >SarsCov2Spike_Specifiedy_by_Mizuno-san
 humanProteinID =  59672 , srsCov2ProteinID =  0
ISSVL
RAAEI
SGINA
GINAS
common SCSs =  4
>XP_005246656.1 nebulin isoform X11 [Homo sapiens]
 >SarsCov2Spike_Specifiedy_by_Mizuno-san
 humanProteinID =  59673 , srsCov2ProteinID =  0
ISSVL
RAAEI
SGINA
GINAS
common SCSs =  4
>XP_005246658.1 nebulin isoform X12 [Homo sapiens]
 >SarsCov2Spike_Specifiedy_by_Mizuno-san
 humanProteinID =  59674 , srsCov2ProteinID =  0
ISSVL
RAAEI
SGINA
GINAS
common SCSs =  4
>XP_005246659.1 nebulin isoform X13 [Homo sapiens]
 >SarsCov2Spike_Specifiedy_by_Mizuno-san
 humanProteinID =  59675 , srsCov2ProteinID =  0
ISSVL
RAAEI
SGINA
GINAS
common SCSs =  4
>XP_005246660.1 nebulin isoform X14 [Homo sapiens]
 >SarsCov2Spike_Specifiedy_by_Mizuno-san
 humanProteinID =  59676 , srsCov2ProteinID =  0
ISSVL
RAAEI
SGINA
GINAS
common SCSs =  4
>XP_005246661.1 nebulin isoform X15 [Homo sapiens]
 >SarsCov2Spike_Specifiedy_by_Mizuno-san
 humanProteinID =  59677 , srsCov2ProteinID =  0
ISSVL
RAAEI
SGINA
GINAS
common SCSs =  4
>XP_005246663.1 nebulin isoform X18 [Homo sapiens]
 >SarsCov2Spike_Specifiedy_by_Mizuno-san
 humanProteinID =  59678 , srsCov2ProteinID =  0
ISSVL
RAAEI
SGINA
GINAS
common SCSs =  4
>XP_005246665.1 nebulin isoform X22 [Homo sapiens]
 >SarsCov2Spike_Specifiedy_by_Mizuno-san
 humanProteinID =  59679 , srsCov2ProteinID =  0
ISSVL
RAAEI
SGINA
GINAS
common SCSs =  4
>XP_005246667.1 nebulin isoform X24 [Homo sapiens]
 >SarsCov2Spike_Specifiedy_by_Mizuno-san
 humanProteinID =  59680 , srsCov2ProteinID =  0
ISSVL
RAAEI
SGINA
GINAS
common SCSs =  4
>XP_005246668.1 nebulin isoform X25 [Homo sapiens]
 >SarsCov2Spike_Specifiedy_by_Mizuno-san
 humanProteinID =  59681 , srsCov2ProteinID =  0
ISSVL
RAAEI
SGINA
GINAS
common SCSs =  4
>XP_005246669.1 nebulin isoform X26 [Homo sapiens]
 >SarsCov2Spike_Specifiedy_by_Mizuno-san
 humanProteinID =  59682 , srsCov2ProteinID =  0
ISSVL
RAAEI
SGINA
GINAS
common SCSs =  4
>XP_005246670.1 nebulin isoform X27 [Homo sapiens]
 >SarsCov2Spike_Specifiedy_by_Mizuno-san
 humanProteinID =  59683 , srsCov2ProteinID =  0
ISSVL
RAAEI
SGINA
GINAS
common SCSs =  4
>XP_005246672.1 nebulin isoform X31 [Homo sapiens]
 >SarsCov2Spike_Specifiedy_by_Mizuno-san
 humanProteinID =  59684 , srsCov2ProteinID =  0
ISSVL
RAAEI
SGINA
GINAS
common SCSs =  4
>XP_005246674.1 nebulin isoform X35 [Homo sapiens]
 >SarsCov2Spike_Specifiedy_by_Mizuno-san
 humanProteinID =  59686 , srsCov2ProteinID =  0
ISSVL
RAAEI
SGINA
GINAS
common SCSs =  4
>XP_005247174.1 very large A-kinase anchor protein isoform X1 [Homo sapiens]
 >SarsCov2Spike_Specifiedy_by_Mizuno-san
 humanProteinID =  59791 , srsCov2ProteinID =  0
NNLDS
LPDPS
TFVSG
FDEDD
common SCSs =  4
>XP_005247326.1 palmitoyltransferase ZDHHC23 isoform X5 [Homo sapiens]
 >SarsCov2Spike_Specifiedy_by_Mizuno-san
 humanProteinID =  59820 , srsCov2ProteinID =  0
LVLLP
LLALH
LALHR
VFLHV
common SCSs =  4
>XP_005248326.1 PDZ domain-containing protein 2 isoform X1 [Homo sapiens]
 >SarsCov2Spike_Specifiedy_by_Mizuno-san
 humanProteinID =  60059 , srsCov2ProteinID =  0
SPRRA
KTSVD
GDSTE
PDPSK
common SCSs =  4
>XP_005248328.1 PDZ domain-containing protein 2 isoform X5 [Homo sapiens]
 >SarsCov2Spike_Specifiedy_by_Mizuno-san
 humanProteinID =  60060 , srsCov2ProteinID =  0
SPRRA
KTSVD
GDSTE
PDPSK
common SCSs =  4
>XP_005248329.1 PDZ domain-containing protein 2 isoform X5 [Homo sapiens]
 >SarsCov2Spike_Specifiedy_by_Mizuno-san
 humanProteinID =  60061 , srsCov2ProteinID =  0
SPRRA
KTSVD
GDSTE
PDPSK
common SCSs =  4
>XP_005248403.1 ciliogenesis and planar polarity effector 1 isoform X2 [Homo sapiens]
 >SarsCov2Spike_Specifiedy_by_Mizuno-san
 humanProteinID =  60079 , srsCov2ProteinID =  0
NLCPF
VLPPL
ENQKL
CVLGQ
common SCSs =  4
>XP_005248404.1 ciliogenesis and planar polarity effector 1 isoform X3 [Homo sapiens]
 >SarsCov2Spike_Specifiedy_by_Mizuno-san
 humanProteinID =  60080 , srsCov2ProteinID =  0
NLCPF
VLPPL
ENQKL
CVLGQ
common SCSs =  4
>XP_005248406.1 ciliogenesis and planar polarity effector 1 isoform X6 [Homo sapiens]
 >SarsCov2Spike_Specifiedy_by_Mizuno-san
 humanProteinID =  60081 , srsCov2ProteinID =  0
NLCPF
VLPPL
ENQKL
CVLGQ
common SCSs =  4
>XP_005248407.1 ciliogenesis and planar polarity effector 1 isoform X7 [Homo sapiens]
 >SarsCov2Spike_Specifiedy_by_Mizuno-san
 humanProteinID =  60082 , srsCov2ProteinID =  0
NLCPF
VLPPL
ENQKL
CVLGQ
common SCSs =  4
>XP_005248731.1 centrosomal protein of 162 kDa isoform X1 [Homo sapiens]
 >SarsCov2Spike_Specifiedy_by_Mizuno-san
 humanProteinID =  60147 , srsCov2ProteinID =  0
TLDSK
DLEGK
TGTGV
IQKEI
common SCSs =  4
>XP_005248757.1 midasin isoform X5 [Homo sapiens]
 >SarsCov2Spike_Specifiedy_by_Mizuno-san
 humanProteinID =  60156 , srsCov2ProteinID =  0
LLALH
LNRAL
KPSKR
AISSV
common SCSs =  4
>XP_005248770.1 filamin-A-interacting protein 1 isoform X1 [Homo sapiens]
 >SarsCov2Spike_Specifiedy_by_Mizuno-san
 humanProteinID =  60161 , srsCov2ProteinID =  0
RSSVL
LKSFT
KSFTV
DYSVL
common SCSs =  4
>XP_005248772.1 filamin-A-interacting protein 1 isoform X2 [Homo sapiens]
 >SarsCov2Spike_Specifiedy_by_Mizuno-san
 humanProteinID =  60162 , srsCov2ProteinID =  0
RSSVL
LKSFT
KSFTV
DYSVL
common SCSs =  4
>XP_005248786.1 PH-interacting protein isoform X1 [Homo sapiens]
 >SarsCov2Spike_Specifiedy_by_Mizuno-san
 humanProteinID =  60167 , srsCov2ProteinID =  0
PSKRS
ALNTL
ISSVL
EDDSE
common SCSs =  4
>XP_005249372.1 dystonin isoform X9 [Homo sapiens]
 >SarsCov2Spike_Specifiedy_by_Mizuno-san
 humanProteinID =  60285 , srsCov2ProteinID =  0
FLVLL
TEKSN
LDKVE
AGLIA
common SCSs =  4
>XP_005250977.1 matrilin-2 isoform X2 [Homo sapiens]
 >SarsCov2Spike_Specifiedy_by_Mizuno-san
 humanProteinID =  60589 , srsCov2ProteinID =  0
QPTES
LLQYG
LQYGS
NFSQI
common SCSs =  4
>XP_005254306.1 MAX gene-associated protein isoform X3 [Homo sapiens]
 >SarsCov2Spike_Specifiedy_by_Mizuno-san
 humanProteinID =  61191 , srsCov2ProteinID =  0
NVVIK
LMDLE
LDPLS
PSKPS
common SCSs =  4
>XP_005254309.1 MAX gene-associated protein isoform X6 [Homo sapiens]
 >SarsCov2Spike_Specifiedy_by_Mizuno-san
 humanProteinID =  61192 , srsCov2ProteinID =  0
NVVIK
LMDLE
LDPLS
PSKPS
common SCSs =  4
>XP_005254354.1 RNA polymerase II-associated protein 1 isoform X1 [Homo sapiens]
 >SarsCov2Spike_Specifiedy_by_Mizuno-san
 humanProteinID =  61202 , srsCov2ProteinID =  0
LVLLP
VLLPL
AGSTP
PDVDL
common SCSs =  4
>XP_005254861.1 inositol hexakisphosphate and diphosphoinositol-pentakisphosphate kinase 1 isoform X6 [Homo sapiens]
 >SarsCov2Spike_Specifiedy_by_Mizuno-san
 humanProteinID =  61291 , srsCov2ProteinID =  0
DPLSE
RLFRK
DSLSS
EPQII
common SCSs =  4
>XP_005255239.1 serine/threonine-protein kinase SMG1 isoform X1 [Homo sapiens]
 >SarsCov2Spike_Specifiedy_by_Mizuno-san
 humanProteinID =  61358 , srsCov2ProteinID =  0
AVRDP
LLLQY
LVKQL
VYDPL
common SCSs =  4
>XP_005255240.1 serine/threonine-protein kinase SMG1 isoform X3 [Homo sapiens]
 >SarsCov2Spike_Specifiedy_by_Mizuno-san
 humanProteinID =  61359 , srsCov2ProteinID =  0
AVRDP
LLLQY
LVKQL
VYDPL
common SCSs =  4
>XP_005255241.1 serine/threonine-protein kinase SMG1 isoform X4 [Homo sapiens]
 >SarsCov2Spike_Specifiedy_by_Mizuno-san
 humanProteinID =  61360 , srsCov2ProteinID =  0
AVRDP
LLLQY
LVKQL
VYDPL
common SCSs =  4
>XP_005255916.3 genetic suppressor element 1 isoform X1 [Homo sapiens]
 >SarsCov2Spike_Specifiedy_by_Mizuno-san
 humanProteinID =  61479 , srsCov2ProteinID =  0
AAAYY
DPLSE
QLTPT
TNSPR
common SCSs =  4
>XP_005255918.3 genetic suppressor element 1 isoform X3 [Homo sapiens]
 >SarsCov2Spike_Specifiedy_by_Mizuno-san
 humanProteinID =  61481 , srsCov2ProteinID =  0
AAAYY
DPLSE
QLTPT
TNSPR
common SCSs =  4
>XP_005256012.1 carbohydrate sulfotransferase 6 isoform X1 [Homo sapiens]
 >SarsCov2Spike_Specifiedy_by_Mizuno-san
 humanProteinID =  61492 , srsCov2ProteinID =  0
GTNGT
SSTAS
GAISS
AEIRA
common SCSs =  4
>XP_005256486.1 chromodomain-helicase-DNA-binding protein 3 isoform X7 [Homo sapiens]
 >SarsCov2Spike_Specifiedy_by_Mizuno-san
 humanProteinID =  61607 , srsCov2ProteinID =  0
LVRDL
LPPLL
ILSRL
PVLKG
common SCSs =  4
>XP_005256923.1 nuclear receptor corepressor 1 isoform X1 [Homo sapiens]
 >SarsCov2Spike_Specifiedy_by_Mizuno-san
 humanProteinID =  61696 , srsCov2ProteinID =  0
GTNGT
YNSAS
SVITP
GAENS
common SCSs =  4
>XP_005256925.1 nuclear receptor corepressor 1 isoform X2 [Homo sapiens]
 >SarsCov2Spike_Specifiedy_by_Mizuno-san
 humanProteinID =  61697 , srsCov2ProteinID =  0
GTNGT
YNSAS
SVITP
GAENS
common SCSs =  4
>XP_005256928.1 nuclear receptor corepressor 1 isoform X4 [Homo sapiens]
 >SarsCov2Spike_Specifiedy_by_Mizuno-san
 humanProteinID =  61698 , srsCov2ProteinID =  0
GTNGT
YNSAS
SVITP
GAENS
common SCSs =  4
>XP_005256929.1 nuclear receptor corepressor 1 isoform X5 [Homo sapiens]
 >SarsCov2Spike_Specifiedy_by_Mizuno-san
 humanProteinID =  61699 , srsCov2ProteinID =  0
GTNGT
YNSAS
SVITP
GAENS
common SCSs =  4
>XP_005256931.1 nuclear receptor corepressor 1 isoform X8 [Homo sapiens]
 >SarsCov2Spike_Specifiedy_by_Mizuno-san
 humanProteinID =  61701 , srsCov2ProteinID =  0
GTNGT
YNSAS
SVITP
GAENS
common SCSs =  4
>XP_005256932.1 nuclear receptor corepressor 1 isoform X12 [Homo sapiens]
 >SarsCov2Spike_Specifiedy_by_Mizuno-san
 humanProteinID =  61702 , srsCov2ProteinID =  0
GTNGT
YNSAS
SVITP
GAENS
common SCSs =  4
>XP_005257086.1 kinesin-like protein KIF19 isoform X3 [Homo sapiens]
 >SarsCov2Spike_Specifiedy_by_Mizuno-san
 humanProteinID =  61722 , srsCov2ProteinID =  0
PGDSS
IAQYT
AQYTS
EVQID
common SCSs =  4
>XP_005257087.1 kinesin-like protein KIF19 isoform X6 [Homo sapiens]
 >SarsCov2Spike_Specifiedy_by_Mizuno-san
 humanProteinID =  61723 , srsCov2ProteinID =  0
PGDSS
IAQYT
AQYTS
EVQID
common SCSs =  4
>XP_005258411.1 FH1/FH2 domain-containing protein 3 isoform X12 [Homo sapiens]
 >SarsCov2Spike_Specifiedy_by_Mizuno-san
 humanProteinID =  61975 , srsCov2ProteinID =  0
GLTVL
LTVLP
TVLPP
DVDLG
common SCSs =  4
>XP_005258412.1 FH1/FH2 domain-containing protein 3 isoform X14 [Homo sapiens]
 >SarsCov2Spike_Specifiedy_by_Mizuno-san
 humanProteinID =  61976 , srsCov2ProteinID =  0
GLTVL
LTVLP
TVLPP
DVDLG
common SCSs =  4
>XP_005258890.1 BRD4-interacting chromatin-remodeling complex-associated protein isoform X1 [Homo sapiens]
 >SarsCov2Spike_Specifiedy_by_Mizuno-san
 humanProteinID =  62059 , srsCov2ProteinID =  0
LPPLL
GAGAA
QDVVN
SPDVD
common SCSs =  4
>XP_005259220.1 pleckstrin homology domain-containing family G member 2 isoform X2 [Homo sapiens]
 >SarsCov2Spike_Specifiedy_by_Mizuno-san
 humanProteinID =  62116 , srsCov2ProteinID =  0
SLSST
RASAN
LQELG
QELGK
common SCSs =  4
>XP_005259343.1 symplekin isoform X1 [Homo sapiens]
 >SarsCov2Spike_Specifiedy_by_Mizuno-san
 humanProteinID =  62146 , srsCov2ProteinID =  0
RSVAS
SVASQ
KLIAN
ILSRL
common SCSs =  4
>XP_005260242.1 transcription factor-like 5 protein isoform X3 [Homo sapiens]
 >SarsCov2Spike_Specifiedy_by_Mizuno-san
 humanProteinID =  62309 , srsCov2ProteinID =  0
AGAAA
LVKNK
SALLA
GAGAA
common SCSs =  4
>XP_005261120.1 nuclear receptor-interacting protein 1 isoform X1 [Homo sapiens]
 >SarsCov2Spike_Specifiedy_by_Mizuno-san
 humanProteinID =  62494 , srsCov2ProteinID =  0
TQSLL
PPLLT
ALLAG
IDRLN
common SCSs =  4
>XP_005261122.1 nuclear receptor-interacting protein 1 isoform X1 [Homo sapiens]
 >SarsCov2Spike_Specifiedy_by_Mizuno-san
 humanProteinID =  62495 , srsCov2ProteinID =  0
TQSLL
PPLLT
ALLAG
IDRLN
common SCSs =  4
>XP_005261850.1 uncharacterized protein KIAA1671 isoform X1 [Homo sapiens]
 >SarsCov2Spike_Specifiedy_by_Mizuno-san
 humanProteinID =  62600 , srsCov2ProteinID =  0
RSSVL
LDPLS
LYENQ
TASAL
common SCSs =  4
>XP_005261851.1 uncharacterized protein KIAA1671 isoform X1 [Homo sapiens]
 >SarsCov2Spike_Specifiedy_by_Mizuno-san
 humanProteinID =  62601 , srsCov2ProteinID =  0
RSSVL
LDPLS
LYENQ
TASAL
common SCSs =  4
>XP_005262399.1 SLIT and NTRK-like protein 2 isoform X1 [Homo sapiens]
 >SarsCov2Spike_Specifiedy_by_Mizuno-san
 humanProteinID =  62696 , srsCov2ProteinID =  0
ADYNY
LQYGS
LQSLQ
IDLQE
common SCSs =  4
>XP_005262400.1 SLIT and NTRK-like protein 2 isoform X1 [Homo sapiens]
 >SarsCov2Spike_Specifiedy_by_Mizuno-san
 humanProteinID =  62697 , srsCov2ProteinID =  0
ADYNY
LQYGS
LQSLQ
IDLQE
common SCSs =  4
>XP_005262401.1 SLIT and NTRK-like protein 2 isoform X1 [Homo sapiens]
 >SarsCov2Spike_Specifiedy_by_Mizuno-san
 humanProteinID =  62698 , srsCov2ProteinID =  0
ADYNY
LQYGS
LQSLQ
IDLQE
common SCSs =  4
>XP_005262402.1 SLIT and NTRK-like protein 2 isoform X1 [Homo sapiens]
 >SarsCov2Spike_Specifiedy_by_Mizuno-san
 humanProteinID =  62699 , srsCov2ProteinID =  0
ADYNY
LQYGS
LQSLQ
IDLQE
common SCSs =  4
>XP_005262891.1 protocadherin Fat 1 isoform X1 [Homo sapiens]
 >SarsCov2Spike_Specifiedy_by_Mizuno-san
 humanProteinID =  62799 , srsCov2ProteinID =  0
VFRSS
SGTNG
SLSST
LSSTA
common SCSs =  4
>XP_005262892.1 protocadherin Fat 1 isoform X1 [Homo sapiens]
 >SarsCov2Spike_Specifiedy_by_Mizuno-san
 humanProteinID =  62800 , srsCov2ProteinID =  0
VFRSS
SGTNG
SLSST
LSSTA
common SCSs =  4
>XP_005264475.1 girdin isoform X1 [Homo sapiens]
 >SarsCov2Spike_Specifiedy_by_Mizuno-san
 humanProteinID =  63129 , srsCov2ProteinID =  0
SQPFL
NSNNL
NQNAQ
LDSFK
common SCSs =  4
>XP_005265184.1 laminin subunit beta-2 isoform X1 [Homo sapiens]
 >SarsCov2Spike_Specifiedy_by_Mizuno-san
 humanProteinID =  63292 , srsCov2ProteinID =  0
LVLLP
GSTPC
RRARS
ALGKL
common SCSs =  4
>XP_005265360.1 histone-lysine N-methyltransferase SETD5 isoform X14 [Homo sapiens]
 >SarsCov2Spike_Specifiedy_by_Mizuno-san
 humanProteinID =  63311 , srsCov2ProteinID =  0
STGSN
GDIAA
AARDL
SLSST
common SCSs =  4
>XP_005266356.1 E3 ubiquitin-protein ligase MYCBP2 isoform X8 [Homo sapiens]
 >SarsCov2Spike_Specifiedy_by_Mizuno-san
 humanProteinID =  63510 , srsCov2ProteinID =  0
NGTIT
TASAL
ASALG
RLDKV
common SCSs =  4
>XP_005266403.1 neurobeachin isoform X6 [Homo sapiens]
 >SarsCov2Spike_Specifiedy_by_Mizuno-san
 humanProteinID =  63530 , srsCov2ProteinID =  0
FRVYS
RVYST
VNQNA
DEDDS
common SCSs =  4
>XP_005267003.1 glutamate receptor ionotropic, kainate 2 isoform X4 [Homo sapiens]
 >SarsCov2Spike_Specifiedy_by_Mizuno-san
 humanProteinID =  63633 , srsCov2ProteinID =  0
ASALG
ANLAA
FVTQR
VTQRN
common SCSs =  4
>XP_005267038.1 laminin subunit alpha-2 isoform X1 [Homo sapiens]
 >SarsCov2Spike_Specifiedy_by_Mizuno-san
 humanProteinID =  63640 , srsCov2ProteinID =  0
FGGVS
GKIQD
LNTLV
QKEID
common SCSs =  4
>XP_005267039.1 laminin subunit alpha-2 isoform X3 [Homo sapiens]
 >SarsCov2Spike_Specifiedy_by_Mizuno-san
 humanProteinID =  63641 , srsCov2ProteinID =  0
FGGVS
GKIQD
LNTLV
QKEID
common SCSs =  4
>XP_005267040.2 laminin subunit alpha-4 isoform X1 [Homo sapiens]
 >SarsCov2Spike_Specifiedy_by_Mizuno-san
 humanProteinID =  63642 , srsCov2ProteinID =  0
RSVAS
GGFNF
SLSST
LSSTA
common SCSs =  4
>XP_005267041.2 laminin subunit alpha-4 isoform X1 [Homo sapiens]
 >SarsCov2Spike_Specifiedy_by_Mizuno-san
 humanProteinID =  63643 , srsCov2ProteinID =  0
RSVAS
GGFNF
SLSST
LSSTA
common SCSs =  4
>XP_005267119.1 NHS-like protein 1 isoform X2 [Homo sapiens]
 >SarsCov2Spike_Specifiedy_by_Mizuno-san
 humanProteinID =  63660 , srsCov2ProteinID =  0
IAIPT
NIQKE
LNESL
NESLI
common SCSs =  4
>XP_005267487.1 disheveled-associated activator of morphogenesis 1 isoform X1 [Homo sapiens]
 >SarsCov2Spike_Specifiedy_by_Mizuno-san
 humanProteinID =  63741 , srsCov2ProteinID =  0
TRFQT
RFQTL
NRKRI
RLQSL
common SCSs =  4
>XP_005267488.1 disheveled-associated activator of morphogenesis 1 isoform X1 [Homo sapiens]
 >SarsCov2Spike_Specifiedy_by_Mizuno-san
 humanProteinID =  63742 , srsCov2ProteinID =  0
TRFQT
RFQTL
NRKRI
RLQSL
common SCSs =  4
>XP_005267559.2 E3 ubiquitin-protein ligase HECTD1 isoform X1 [Homo sapiens]
 >SarsCov2Spike_Specifiedy_by_Mizuno-san
 humanProteinID =  63753 , srsCov2ProteinID =  0
LVDLP
VDLPI
PRTFL
DILSR
common SCSs =  4
>XP_005267573.1 signal-induced proliferation-associated 1-like protein 1 isoform X1 [Homo sapiens]
 >SarsCov2Spike_Specifiedy_by_Mizuno-san
 humanProteinID =  63755 , srsCov2ProteinID =  0
SASFS
QAGST
AGSTP
DSLSS
common SCSs =  4
>XP_005267816.1 homeobox protein SIX4 isoform X1 [Homo sapiens]
 >SarsCov2Spike_Specifiedy_by_Mizuno-san
 humanProteinID =  63788 , srsCov2ProteinID =  0
AGAAA
RDIAD
VNQNA
NQNAQ
common SCSs =  4
>XP_005269107.1 nck-associated protein 5-like isoform X2 [Homo sapiens]
 >SarsCov2Spike_Specifiedy_by_Mizuno-san
 humanProteinID =  64073 , srsCov2ProteinID =  0
RVYSS
SPTKL
SLSST
ALGKL
common SCSs =  4
>XP_005269272.1 neuron navigator 3 isoform X3 [Homo sapiens]
 >SarsCov2Spike_Specifiedy_by_Mizuno-san
 humanProteinID =  64120 , srsCov2ProteinID =  0
TITSG
TGRLQ
GRLQS
RLQSL
common SCSs =  4
>XP_005269814.1 Hermansky-Pudlak syndrome 1 protein isoform X2 [Homo sapiens]
 >SarsCov2Spike_Specifiedy_by_Mizuno-san
 humanProteinID =  64215 , srsCov2ProteinID =  0
LLALH
SPRRA
PRRAR
RRARS
common SCSs =  4
>XP_005269863.2 WASH complex subunit 2A isoform X1 [Homo sapiens]
 >SarsCov2Spike_Specifiedy_by_Mizuno-san
 humanProteinID =  64223 , srsCov2ProteinID =  0
SKPSK
IGKIQ
PDVDL
EPVLK
common SCSs =  4
>XP_005269864.2 WASH complex subunit 2A isoform X2 [Homo sapiens]
 >SarsCov2Spike_Specifiedy_by_Mizuno-san
 humanProteinID =  64224 , srsCov2ProteinID =  0
SKPSK
IGKIQ
PDVDL
EPVLK
common SCSs =  4
>XP_005270210.1 multimerin-2 isoform X1 [Homo sapiens]
 >SarsCov2Spike_Specifiedy_by_Mizuno-san
 humanProteinID =  64281 , srsCov2ProteinID =  0
EPLVD
TLLAL
GAGAA
LGKLQ
common SCSs =  4
>XP_005270333.1 disks large homolog 5 isoform X1 [Homo sapiens]
 >SarsCov2Spike_Specifiedy_by_Mizuno-san
 humanProteinID =  64312 , srsCov2ProteinID =  0
PPLLT
PLLTD
LSSTA
LQSLQ
common SCSs =  4
>XP_005270667.2 homeodomain-interacting protein kinase 1 isoform X1 [Homo sapiens]
 >SarsCov2Spike_Specifiedy_by_Mizuno-san
 humanProteinID =  64366 , srsCov2ProteinID =  0
GCVIA
QPYRV
VSVIT
ILSRL
common SCSs =  4
>XP_005270668.2 homeodomain-interacting protein kinase 1 isoform X2 [Homo sapiens]
 >SarsCov2Spike_Specifiedy_by_Mizuno-san
 humanProteinID =  64367 , srsCov2ProteinID =  0
GCVIA
QPYRV
VSVIT
ILSRL
common SCSs =  4
>XP_005270670.1 homeodomain-interacting protein kinase 1 isoform X5 [Homo sapiens]
 >SarsCov2Spike_Specifiedy_by_Mizuno-san
 humanProteinID =  64368 , srsCov2ProteinID =  0
GCVIA
QPYRV
VSVIT
ILSRL
common SCSs =  4
>XP_005271575.1 glutamate receptor 4 isoform X1 [Homo sapiens]
 >SarsCov2Spike_Specifiedy_by_Mizuno-san
 humanProteinID =  64539 , srsCov2ProteinID =  0
NLDSK
KVGGN
YTSAL
ANLAA
common SCSs =  4
>XP_005271966.1 dmX-like protein 1 isoform X1 [Homo sapiens]
 >SarsCov2Spike_Specifiedy_by_Mizuno-san
 humanProteinID =  64607 , srsCov2ProteinID =  0
GEVFN
GLTVL
LAGTI
LNESL
common SCSs =  4
>XP_005271969.1 dmX-like protein 1 isoform X3 [Homo sapiens]
 >SarsCov2Spike_Specifiedy_by_Mizuno-san
 humanProteinID =  64609 , srsCov2ProteinID =  0
GEVFN
GLTVL
LAGTI
LNESL
common SCSs =  4
>XP_006710506.2 homeodomain-interacting protein kinase 1 isoform X3 [Homo sapiens]
 >SarsCov2Spike_Specifiedy_by_Mizuno-san
 humanProteinID =  65266 , srsCov2ProteinID =  0
GCVIA
QPYRV
VSVIT
ILSRL
common SCSs =  4
>XP_006712019.1 dynein heavy chain 6, axonemal isoform X1 [Homo sapiens]
 >SarsCov2Spike_Specifiedy_by_Mizuno-san
 humanProteinID =  65643 , srsCov2ProteinID =  0
NPVLP
SALEP
DFGGF
PSKRS
common SCSs =  4
>XP_006712604.1 nebulin isoform X17 [Homo sapiens]
 >SarsCov2Spike_Specifiedy_by_Mizuno-san
 humanProteinID =  65811 , srsCov2ProteinID =  0
ISSVL
RAAEI
SGINA
GINAS
common SCSs =  4
>XP_006712605.1 nebulin isoform X20 [Homo sapiens]
 >SarsCov2Spike_Specifiedy_by_Mizuno-san
 humanProteinID =  65812 , srsCov2ProteinID =  0
ISSVL
RAAEI
SGINA
GINAS
common SCSs =  4
>XP_006712680.1 dedicator of cytokinesis protein 10 isoform X6 [Homo sapiens]
 >SarsCov2Spike_Specifiedy_by_Mizuno-san
 humanProteinID =  65832 , srsCov2ProteinID =  0
HRSYL
NTSNQ
VNNTV
KYEQY
common SCSs =  4
>XP_006712877.1 protein TANC1 isoform X22 [Homo sapiens]
 >SarsCov2Spike_Specifiedy_by_Mizuno-san
 humanProteinID =  65899 , srsCov2ProteinID =  0
TRAGC
KRSFI
RSFIE
FPREG
common SCSs =  4
>XP_006713625.1 palmitoyltransferase ZDHHC23 isoform X3 [Homo sapiens]
 >SarsCov2Spike_Specifiedy_by_Mizuno-san
 humanProteinID =  66120 , srsCov2ProteinID =  0
LVLLP
LLALH
LALHR
VFLHV
common SCSs =  4
>XP_006714202.1 protocadherin Fat 1 isoform X2 [Homo sapiens]
 >SarsCov2Spike_Specifiedy_by_Mizuno-san
 humanProteinID =  66278 , srsCov2ProteinID =  0
VFRSS
SGTNG
SLSST
LSSTA
common SCSs =  4
>XP_006714523.1 PDZ domain-containing protein 2 isoform X7 [Homo sapiens]
 >SarsCov2Spike_Specifiedy_by_Mizuno-san
 humanProteinID =  66337 , srsCov2ProteinID =  0
SPRRA
KTSVD
GDSTE
PDPSK
common SCSs =  4
>XP_006715443.1 centrosomal protein of 162 kDa isoform X2 [Homo sapiens]
 >SarsCov2Spike_Specifiedy_by_Mizuno-san
 humanProteinID =  66590 , srsCov2ProteinID =  0
TLDSK
DLEGK
TGTGV
IQKEI
common SCSs =  4
>XP_006715468.1 midasin isoform X4 [Homo sapiens]
 >SarsCov2Spike_Specifiedy_by_Mizuno-san
 humanProteinID =  66591 , srsCov2ProteinID =  0
LLALH
LNRAL
KPSKR
AISSV
common SCSs =  4
>XP_006715809.1 anillin isoform X1 [Homo sapiens]
 >SarsCov2Spike_Specifiedy_by_Mizuno-san
 humanProteinID =  66710 , srsCov2ProteinID =  0
SKTQS
KTQSL
ANLAA
NLAAT
common SCSs =  4
>XP_006715810.1 anillin isoform X4 [Homo sapiens]
 >SarsCov2Spike_Specifiedy_by_Mizuno-san
 humanProteinID =  66711 , srsCov2ProteinID =  0
SKTQS
KTQSL
ANLAA
NLAAT
common SCSs =  4
>XP_006716300.1 myomesin-2 isoform X1 [Homo sapiens]
 >SarsCov2Spike_Specifiedy_by_Mizuno-san
 humanProteinID =  66830 , srsCov2ProteinID =  0
ALDPL
TKTSV
HDGKA
SEPVL
common SCSs =  4
>XP_006717894.2 WASH complex subunit 2A isoform X6 [Homo sapiens]
 >SarsCov2Spike_Specifiedy_by_Mizuno-san
 humanProteinID =  67249 , srsCov2ProteinID =  0
SKPSK
IGKIQ
PDVDL
EPVLK
common SCSs =  4
>XP_006717948.1 1-phosphatidylinositol 4,5-bisphosphate phosphodiesterase epsilon-1 isoform X1 [Homo sapiens]
 >SarsCov2Spike_Specifiedy_by_Mizuno-san
 humanProteinID =  67264 , srsCov2ProteinID =  0
VADYS
RQIAP
AKNLN
LIDLQ
common SCSs =  4
>XP_006717951.1 1-phosphatidylinositol 4,5-bisphosphate phosphodiesterase epsilon-1 isoform X2 [Homo sapiens]
 >SarsCov2Spike_Specifiedy_by_Mizuno-san
 humanProteinID =  67265 , srsCov2ProteinID =  0
VADYS
RQIAP
AKNLN
LIDLQ
common SCSs =  4
>XP_006717952.1 1-phosphatidylinositol 4,5-bisphosphate phosphodiesterase epsilon-1 isoform X3 [Homo sapiens]
 >SarsCov2Spike_Specifiedy_by_Mizuno-san
 humanProteinID =  67266 , srsCov2ProteinID =  0
VADYS
RQIAP
AKNLN
LIDLQ
common SCSs =  4
>XP_006718033.1 multimerin-2 isoform X1 [Homo sapiens]
 >SarsCov2Spike_Specifiedy_by_Mizuno-san
 humanProteinID =  67290 , srsCov2ProteinID =  0
EPLVD
TLLAL
GAGAA
LGKLQ
common SCSs =  4
>XP_006718120.1 disks large homolog 5 isoform X12 [Homo sapiens]
 >SarsCov2Spike_Specifiedy_by_Mizuno-san
 humanProteinID =  67321 , srsCov2ProteinID =  0
PPLLT
PLLTD
LSSTA
LQSLQ
common SCSs =  4
>XP_006718427.1 neuron navigator 2 isoform X3 [Homo sapiens]
 >SarsCov2Spike_Specifiedy_by_Mizuno-san
 humanProteinID =  67385 , srsCov2ProteinID =  0
MDLEG
TISVT
FNFSQ
RLQSL
common SCSs =  4
>XP_006718428.1 neuron navigator 2 isoform X4 [Homo sapiens]
 >SarsCov2Spike_Specifiedy_by_Mizuno-san
 humanProteinID =  67386 , srsCov2ProteinID =  0
MDLEG
TISVT
FNFSQ
RLQSL
common SCSs =  4
>XP_006718429.1 neuron navigator 2 isoform X11 [Homo sapiens]
 >SarsCov2Spike_Specifiedy_by_Mizuno-san
 humanProteinID =  67387 , srsCov2ProteinID =  0
MDLEG
TISVT
FNFSQ
RLQSL
common SCSs =  4
>XP_006718886.1 glutamate receptor 4 isoform X2 [Homo sapiens]
 >SarsCov2Spike_Specifiedy_by_Mizuno-san
 humanProteinID =  67518 , srsCov2ProteinID =  0
NLDSK
KVGGN
YTSAL
ANLAA
common SCSs =  4
>XP_006718902.2 histone-lysine N-methyltransferase 2A isoform X5 [Homo sapiens]
 >SarsCov2Spike_Specifiedy_by_Mizuno-san
 humanProteinID =  67522 , srsCov2ProteinID =  0
QVAVL
VNCTE
VVNQN
SSVLN
common SCSs =  4
>XP_006719690.1 protein FAM186B isoform X3 [Homo sapiens]
 >SarsCov2Spike_Specifiedy_by_Mizuno-san
 humanProteinID =  67742 , srsCov2ProteinID =  0
VLLPL
LLPLV
RLQSL
RASAN
common SCSs =  4
>XP_006719844.1 E3 ubiquitin-protein ligase MYCBP2 isoform X3 [Homo sapiens]
 >SarsCov2Spike_Specifiedy_by_Mizuno-san
 humanProteinID =  67782 , srsCov2ProteinID =  0
NGTIT
TASAL
ASALG
RLDKV
common SCSs =  4
>XP_006719848.1 E3 ubiquitin-protein ligase MYCBP2 isoform X10 [Homo sapiens]
 >SarsCov2Spike_Specifiedy_by_Mizuno-san
 humanProteinID =  67786 , srsCov2ProteinID =  0
NGTIT
TASAL
ASALG
RLDKV
common SCSs =  4
>XP_006719849.1 E3 ubiquitin-protein ligase MYCBP2 isoform X14 [Homo sapiens]
 >SarsCov2Spike_Specifiedy_by_Mizuno-san
 humanProteinID =  67787 , srsCov2ProteinID =  0
NGTIT
TASAL
ASALG
RLDKV
common SCSs =  4
>XP_006719851.1 E3 ubiquitin-protein ligase MYCBP2 isoform X16 [Homo sapiens]
 >SarsCov2Spike_Specifiedy_by_Mizuno-san
 humanProteinID =  67789 , srsCov2ProteinID =  0
NGTIT
TASAL
ASALG
RLDKV
common SCSs =  4
>XP_006719852.1 E3 ubiquitin-protein ligase MYCBP2 isoform X29 [Homo sapiens]
 >SarsCov2Spike_Specifiedy_by_Mizuno-san
 humanProteinID =  67790 , srsCov2ProteinID =  0
NGTIT
TASAL
ASALG
RLDKV
common SCSs =  4
>XP_006719866.1 neurobeachin isoform X3 [Homo sapiens]
 >SarsCov2Spike_Specifiedy_by_Mizuno-san
 humanProteinID =  67795 , srsCov2ProteinID =  0
FRVYS
RVYST
VNQNA
DEDDS
common SCSs =  4
>XP_006719868.1 neurobeachin isoform X12 [Homo sapiens]
 >SarsCov2Spike_Specifiedy_by_Mizuno-san
 humanProteinID =  67796 , srsCov2ProteinID =  0
FRVYS
RVYST
VNQNA
DEDDS
common SCSs =  4
>XP_006719869.1 neurobeachin isoform X5 [Homo sapiens]
 >SarsCov2Spike_Specifiedy_by_Mizuno-san
 humanProteinID =  67797 , srsCov2ProteinID =  0
FRVYS
RVYST
VNQNA
DEDDS
common SCSs =  4
>XP_006720849.1 inositol hexakisphosphate and diphosphoinositol-pentakisphosphate kinase 1 isoform X8 [Homo sapiens]
 >SarsCov2Spike_Specifiedy_by_Mizuno-san
 humanProteinID =  68061 , srsCov2ProteinID =  0
DPLSE
RLFRK
DSLSS
EPQII
common SCSs =  4
>XP_006721269.1 hydrocephalus-inducing protein homolog isoform X6 [Homo sapiens]
 >SarsCov2Spike_Specifiedy_by_Mizuno-san
 humanProteinID =  68159 , srsCov2ProteinID =  0
QLPPA
IYQAG
ILPVS
VLPPL
common SCSs =  4
>XP_006721491.1 chromodomain-helicase-DNA-binding protein 3 isoform X14 [Homo sapiens]
 >SarsCov2Spike_Specifiedy_by_Mizuno-san
 humanProteinID =  68204 , srsCov2ProteinID =  0
LVRDL
LPPLL
ILSRL
PVLKG
common SCSs =  4
>XP_006721664.1 nuclear receptor corepressor 1 isoform X1 [Homo sapiens]
 >SarsCov2Spike_Specifiedy_by_Mizuno-san
 humanProteinID =  68246 , srsCov2ProteinID =  0
GTNGT
YNSAS
SVITP
GAENS
common SCSs =  4
>XP_006721665.1 nuclear receptor corepressor 1 isoform X2 [Homo sapiens]
 >SarsCov2Spike_Specifiedy_by_Mizuno-san
 humanProteinID =  68247 , srsCov2ProteinID =  0
GTNGT
YNSAS
SVITP
GAENS
common SCSs =  4
>XP_006721666.1 nuclear receptor corepressor 1 isoform X6 [Homo sapiens]
 >SarsCov2Spike_Specifiedy_by_Mizuno-san
 humanProteinID =  68248 , srsCov2ProteinID =  0
GTNGT
YNSAS
SVITP
GAENS
common SCSs =  4
>XP_006721667.1 nuclear receptor corepressor 1 isoform X10 [Homo sapiens]
 >SarsCov2Spike_Specifiedy_by_Mizuno-san
 humanProteinID =  68249 , srsCov2ProteinID =  0
GTNGT
YNSAS
SVITP
GAENS
common SCSs =  4
>XP_006723397.1 pleckstrin homology domain-containing family G member 2 isoform X5 [Homo sapiens]
 >SarsCov2Spike_Specifiedy_by_Mizuno-san
 humanProteinID =  68697 , srsCov2ProteinID =  0
SLSST
RASAN
LQELG
QELGK
common SCSs =  4
>XP_006723818.1 nuclear receptor coactivator 6 isoform X11 [Homo sapiens]
 >SarsCov2Spike_Specifiedy_by_Mizuno-san
 humanProteinID =  68805 , srsCov2ProteinID =  0
LDSKT
LPQGF
LQPRT
VPAQE
common SCSs =  4
>XP_006724409.1 uncharacterized protein KIAA1671 isoform X1 [Homo sapiens]
 >SarsCov2Spike_Specifiedy_by_Mizuno-san
 humanProteinID =  68963 , srsCov2ProteinID =  0
RSSVL
LDPLS
LYENQ
TASAL
common SCSs =  4
>XP_006724656.1 serine/threonine-protein kinase WNK3 isoform X4 [Homo sapiens]
 >SarsCov2Spike_Specifiedy_by_Mizuno-san
 humanProteinID =  69034 , srsCov2ProteinID =  0
DSKTQ
SKTQS
SVAYS
FNKVT
common SCSs =  4
>XP_011508454.1 uncharacterized protein C1orf105 isoform X1 [Homo sapiens]
 >SarsCov2Spike_Specifiedy_by_Mizuno-san
 humanProteinID =  69709 , srsCov2ProteinID =  0
KIYSK
IYSKH
YSKHT
PTESI
common SCSs =  4
>XP_011509485.1 low-density lipoprotein receptor-related protein 2 isoform X1 [Homo sapiens]
 >SarsCov2Spike_Specifiedy_by_Mizuno-san
 humanProteinID =  70221 , srsCov2ProteinID =  0
ESEFR
IDGYF
TVEKG
CTQLN
common SCSs =  4
>XP_011509486.1 low-density lipoprotein receptor-related protein 2 isoform X2 [Homo sapiens]
 >SarsCov2Spike_Specifiedy_by_Mizuno-san
 humanProteinID =  70222 , srsCov2ProteinID =  0
ESEFR
IDGYF
TVEKG
CTQLN
common SCSs =  4
>XP_011509527.1 nebulin isoform X29 [Homo sapiens]
 >SarsCov2Spike_Specifiedy_by_Mizuno-san
 humanProteinID =  70238 , srsCov2ProteinID =  0
ISSVL
RAAEI
SGINA
GINAS
common SCSs =  4
>XP_011509528.1 nebulin isoform X34 [Homo sapiens]
 >SarsCov2Spike_Specifiedy_by_Mizuno-san
 humanProteinID =  70239 , srsCov2ProteinID =  0
ISSVL
RAAEI
SGINA
GINAS
common SCSs =  4
>XP_011509935.1 anaphase-promoting complex subunit 1 isoform X1 [Homo sapiens]
 >SarsCov2Spike_Specifiedy_by_Mizuno-san
 humanProteinID =  70423 , srsCov2ProteinID =  0
PGQTG
IAARD
AARDL
SCLKG
common SCSs =  4
>XP_011510360.1 protein TANC1 isoform X18 [Homo sapiens]
 >SarsCov2Spike_Specifiedy_by_Mizuno-san
 humanProteinID =  70635 , srsCov2ProteinID =  0
TRAGC
KRSFI
RSFIE
FPREG
common SCSs =  4
>XP_011510364.1 protein TANC1 isoform X23 [Homo sapiens]
 >SarsCov2Spike_Specifiedy_by_Mizuno-san
 humanProteinID =  70637 , srsCov2ProteinID =  0
TRAGC
KRSFI
RSFIE
FPREG
common SCSs =  4
>XP_011510920.1 palmitoyltransferase ZDHHC23 isoform X1 [Homo sapiens]
 >SarsCov2Spike_Specifiedy_by_Mizuno-san
 humanProteinID =  70874 , srsCov2ProteinID =  0
LVLLP
LLALH
LALHR
VFLHV
common SCSs =  4
>XP_011510921.1 palmitoyltransferase ZDHHC23 isoform X4 [Homo sapiens]
 >SarsCov2Spike_Specifiedy_by_Mizuno-san
 humanProteinID =  70875 , srsCov2ProteinID =  0
LVLLP
LLALH
LALHR
VFLHV
common SCSs =  4
>XP_011512140.1 anaphase-promoting complex subunit 4 isoform X1 [Homo sapiens]
 >SarsCov2Spike_Specifiedy_by_Mizuno-san
 humanProteinID =  71423 , srsCov2ProteinID =  0
AGAAA
SNLLL
PELDS
GLIAI
common SCSs =  4
>XP_011512294.1 PDZ domain-containing protein 2 isoform X1 [Homo sapiens]
 >SarsCov2Spike_Specifiedy_by_Mizuno-san
 humanProteinID =  71502 , srsCov2ProteinID =  0
SPRRA
KTSVD
GDSTE
PDPSK
common SCSs =  4
>XP_011512295.1 PDZ domain-containing protein 2 isoform X1 [Homo sapiens]
 >SarsCov2Spike_Specifiedy_by_Mizuno-san
 humanProteinID =  71503 , srsCov2ProteinID =  0
SPRRA
KTSVD
GDSTE
PDPSK
common SCSs =  4
>XP_011512296.1 PDZ domain-containing protein 2 isoform X2 [Homo sapiens]
 >SarsCov2Spike_Specifiedy_by_Mizuno-san
 humanProteinID =  71504 , srsCov2ProteinID =  0
SPRRA
KTSVD
GDSTE
PDPSK
common SCSs =  4
>XP_011512297.1 PDZ domain-containing protein 2 isoform X3 [Homo sapiens]
 >SarsCov2Spike_Specifiedy_by_Mizuno-san
 humanProteinID =  71505 , srsCov2ProteinID =  0
SPRRA
KTSVD
GDSTE
PDPSK
common SCSs =  4
>XP_011512298.1 PDZ domain-containing protein 2 isoform X4 [Homo sapiens]
 >SarsCov2Spike_Specifiedy_by_Mizuno-san
 humanProteinID =  71506 , srsCov2ProteinID =  0
SPRRA
KTSVD
GDSTE
PDPSK
common SCSs =  4
>XP_011512301.1 little elongation complex subunit 1 isoform X1 [Homo sapiens]
 >SarsCov2Spike_Specifiedy_by_Mizuno-san
 humanProteinID =  71508 , srsCov2ProteinID =  0
VSVIT
LPPLL
QALNT
PAQEK
common SCSs =  4
>XP_011512387.1 ciliogenesis and planar polarity effector 1 isoform X1 [Homo sapiens]
 >SarsCov2Spike_Specifiedy_by_Mizuno-san
 humanProteinID =  71561 , srsCov2ProteinID =  0
NLCPF
VLPPL
ENQKL
CVLGQ
common SCSs =  4
>XP_011512388.1 ciliogenesis and planar polarity effector 1 isoform X1 [Homo sapiens]
 >SarsCov2Spike_Specifiedy_by_Mizuno-san
 humanProteinID =  71562 , srsCov2ProteinID =  0
NLCPF
VLPPL
ENQKL
CVLGQ
common SCSs =  4
>XP_011512389.1 ciliogenesis and planar polarity effector 1 isoform X4 [Homo sapiens]
 >SarsCov2Spike_Specifiedy_by_Mizuno-san
 humanProteinID =  71563 , srsCov2ProteinID =  0
NLCPF
VLPPL
ENQKL
CVLGQ
common SCSs =  4
>XP_011512390.1 ciliogenesis and planar polarity effector 1 isoform X5 [Homo sapiens]
 >SarsCov2Spike_Specifiedy_by_Mizuno-san
 humanProteinID =  71564 , srsCov2ProteinID =  0
NLCPF
VLPPL
ENQKL
CVLGQ
common SCSs =  4
>XP_011512391.1 ciliogenesis and planar polarity effector 1 isoform X8 [Homo sapiens]
 >SarsCov2Spike_Specifiedy_by_Mizuno-san
 humanProteinID =  71565 , srsCov2ProteinID =  0
NLCPF
VLPPL
ENQKL
CVLGQ
common SCSs =  4
>XP_011512392.1 ciliogenesis and planar polarity effector 1 isoform X10 [Homo sapiens]
 >SarsCov2Spike_Specifiedy_by_Mizuno-san
 humanProteinID =  71566 , srsCov2ProteinID =  0
NLCPF
VLPPL
ENQKL
CVLGQ
common SCSs =  4
>XP_011512394.1 ciliogenesis and planar polarity effector 1 isoform X12 [Homo sapiens]
 >SarsCov2Spike_Specifiedy_by_Mizuno-san
 humanProteinID =  71567 , srsCov2ProteinID =  0
NLCPF
VLPPL
ENQKL
CVLGQ
common SCSs =  4
>XP_011512986.1 fibrocystin isoform X7 [Homo sapiens]
 >SarsCov2Spike_Specifiedy_by_Mizuno-san
 humanProteinID =  71861 , srsCov2ProteinID =  0
QDLFL
VIRGD
GSTPC
KLQDV
common SCSs =  4
>XP_011512990.1 fibrocystin isoform X13 [Homo sapiens]
 >SarsCov2Spike_Specifiedy_by_Mizuno-san
 humanProteinID =  71865 , srsCov2ProteinID =  0
QDLFL
VIRGD
GSTPC
ITGRL
common SCSs =  4
>XP_011513126.1 dystonin isoform X7 [Homo sapiens]
 >SarsCov2Spike_Specifiedy_by_Mizuno-san
 humanProteinID =  71943 , srsCov2ProteinID =  0
FLVLL
TEKSN
LDKVE
AGLIA
common SCSs =  4
>XP_011513438.2 ATP-binding cassette sub-family A member 13 isoform X6 [Homo sapiens]
 >SarsCov2Spike_Specifiedy_by_Mizuno-san
 humanProteinID =  72104 , srsCov2ProteinID =  0
LEILD
FNFSQ
SALLA
NLAAT
common SCSs =  4
>XP_011513440.1 ATP-binding cassette sub-family A member 13 isoform X8 [Homo sapiens]
 >SarsCov2Spike_Specifiedy_by_Mizuno-san
 humanProteinID =  72106 , srsCov2ProteinID =  0
YLQPR
LEILD
FNFSQ
SALLA
common SCSs =  4
>XP_011513441.1 ATP-binding cassette sub-family A member 13 isoform X9 [Homo sapiens]
 >SarsCov2Spike_Specifiedy_by_Mizuno-san
 humanProteinID =  72107 , srsCov2ProteinID =  0
YLQPR
LEILD
FNFSQ
SALLA
common SCSs =  4
>XP_011513443.1 ATP-binding cassette sub-family A member 13 isoform X12 [Homo sapiens]
 >SarsCov2Spike_Specifiedy_by_Mizuno-san
 humanProteinID =  72108 , srsCov2ProteinID =  0
YLQPR
LEILD
FNFSQ
SALLA
common SCSs =  4
>XP_011513444.1 ATP-binding cassette sub-family A member 13 isoform X13 [Homo sapiens]
 >SarsCov2Spike_Specifiedy_by_Mizuno-san
 humanProteinID =  72109 , srsCov2ProteinID =  0
YLQPR
LEILD
FNFSQ
SALLA
common SCSs =  4
>XP_011513445.1 ATP-binding cassette sub-family A member 13 isoform X14 [Homo sapiens]
 >SarsCov2Spike_Specifiedy_by_Mizuno-san
 humanProteinID =  72110 , srsCov2ProteinID =  0
YLQPR
LEILD
FNFSQ
SALLA
common SCSs =  4
>XP_011513446.1 ATP-binding cassette sub-family A member 13 isoform X15 [Homo sapiens]
 >SarsCov2Spike_Specifiedy_by_Mizuno-san
 humanProteinID =  72111 , srsCov2ProteinID =  0
YLQPR
LEILD
FNFSQ
SALLA
common SCSs =  4
>XP_011513447.1 ATP-binding cassette sub-family A member 13 isoform X16 [Homo sapiens]
 >SarsCov2Spike_Specifiedy_by_Mizuno-san
 humanProteinID =  72112 , srsCov2ProteinID =  0
YLQPR
LEILD
FNFSQ
SALLA
common SCSs =  4
>XP_011513448.1 ATP-binding cassette sub-family A member 13 isoform X17 [Homo sapiens]
 >SarsCov2Spike_Specifiedy_by_Mizuno-san
 humanProteinID =  72113 , srsCov2ProteinID =  0
YLQPR
LEILD
FNFSQ
SALLA
common SCSs =  4
>XP_011513449.1 ATP-binding cassette sub-family A member 13 isoform X18 [Homo sapiens]
 >SarsCov2Spike_Specifiedy_by_Mizuno-san
 humanProteinID =  72114 , srsCov2ProteinID =  0
YLQPR
LEILD
FNFSQ
SALLA
common SCSs =  4
>XP_011513450.1 ATP-binding cassette sub-family A member 13 isoform X19 [Homo sapiens]
 >SarsCov2Spike_Specifiedy_by_Mizuno-san
 humanProteinID =  72115 , srsCov2ProteinID =  0
YLQPR
LEILD
FNFSQ
SALLA
common SCSs =  4
>XP_011513451.1 ATP-binding cassette sub-family A member 13 isoform X20 [Homo sapiens]
 >SarsCov2Spike_Specifiedy_by_Mizuno-san
 humanProteinID =  72116 , srsCov2ProteinID =  0
YLQPR
LEILD
FNFSQ
SALLA
common SCSs =  4
>XP_011514972.1 maltase-glucoamylase, intestinal isoform X1 [Homo sapiens]
 >SarsCov2Spike_Specifiedy_by_Mizuno-san
 humanProteinID =  72815 , srsCov2ProteinID =  0
FTRGV
YQTSN
QILPD
KRSFI
common SCSs =  4
>XP_011514973.1 maltase-glucoamylase, intestinal isoform X1 [Homo sapiens]
 >SarsCov2Spike_Specifiedy_by_Mizuno-san
 humanProteinID =  72816 , srsCov2ProteinID =  0
FTRGV
YQTSN
QILPD
KRSFI
common SCSs =  4
>XP_011514974.1 maltase-glucoamylase, intestinal isoform X1 [Homo sapiens]
 >SarsCov2Spike_Specifiedy_by_Mizuno-san
 humanProteinID =  72817 , srsCov2ProteinID =  0
FTRGV
YQTSN
QILPD
KRSFI
common SCSs =  4
>XP_011514975.1 maltase-glucoamylase, intestinal isoform X1 [Homo sapiens]
 >SarsCov2Spike_Specifiedy_by_Mizuno-san
 humanProteinID =  72818 , srsCov2ProteinID =  0
FTRGV
YQTSN
QILPD
KRSFI
common SCSs =  4
>XP_011514994.1 putative maltase-glucoamylase-like protein FLJ16351 isoform X1 [Homo sapiens]
 >SarsCov2Spike_Specifiedy_by_Mizuno-san
 humanProteinID =  72824 , srsCov2ProteinID =  0
TISVT
ISVTT
QILPD
TYVTQ
common SCSs =  4
>XP_011514995.1 putative maltase-glucoamylase-like protein FLJ16351 isoform X2 [Homo sapiens]
 >SarsCov2Spike_Specifiedy_by_Mizuno-san
 humanProteinID =  72825 , srsCov2ProteinID =  0
TISVT
ISVTT
QILPD
TYVTQ
common SCSs =  4
>XP_011514996.1 putative maltase-glucoamylase-like protein FLJ16351 isoform X3 [Homo sapiens]
 >SarsCov2Spike_Specifiedy_by_Mizuno-san
 humanProteinID =  72826 , srsCov2ProteinID =  0
TISVT
ISVTT
QILPD
TYVTQ
common SCSs =  4
>XP_011515520.1 maestro heat-like repeat-containing protein family member 6 isoform X5 [Homo sapiens]
 >SarsCov2Spike_Specifiedy_by_Mizuno-san
 humanProteinID =  73036 , srsCov2ProteinID =  0
SALEP
LPPLL
GRLQS
IRASA
common SCSs =  4
>XP_011515523.1 maestro heat-like repeat-containing protein family member 6 isoform X7 [Homo sapiens]
 >SarsCov2Spike_Specifiedy_by_Mizuno-san
 humanProteinID =  73039 , srsCov2ProteinID =  0
SALEP
LPPLL
GRLQS
IRASA
common SCSs =  4
>XP_011515673.1 fibrocystin-L isoform X2 [Homo sapiens]
 >SarsCov2Spike_Specifiedy_by_Mizuno-san
 humanProteinID =  73109 , srsCov2ProteinID =  0
GINIT
NLVKN
ISVTT
ANQFN
common SCSs =  4
>XP_011515945.1 RB1-inducible coiled-coil protein 1 isoform X3 [Homo sapiens]
 >SarsCov2Spike_Specifiedy_by_Mizuno-san
 humanProteinID =  73205 , srsCov2ProteinID =  0
LVSSQ
GDSSS
LFRKS
SFCTQ
common SCSs =  4
>XP_011515946.1 RB1-inducible coiled-coil protein 1 isoform X7 [Homo sapiens]
 >SarsCov2Spike_Specifiedy_by_Mizuno-san
 humanProteinID =  73206 , srsCov2ProteinID =  0
LVSSQ
GDSSS
LFRKS
SFCTQ
common SCSs =  4
>XP_011515947.1 RB1-inducible coiled-coil protein 1 isoform X8 [Homo sapiens]
 >SarsCov2Spike_Specifiedy_by_Mizuno-san
 humanProteinID =  73207 , srsCov2ProteinID =  0
LVSSQ
GDSSS
LFRKS
SFCTQ
common SCSs =  4
>XP_011515948.1 RB1-inducible coiled-coil protein 1 isoform X10 [Homo sapiens]
 >SarsCov2Spike_Specifiedy_by_Mizuno-san
 humanProteinID =  73208 , srsCov2ProteinID =  0
LVSSQ
GDSSS
LFRKS
SFCTQ
common SCSs =  4
>XP_011515949.1 RB1-inducible coiled-coil protein 1 isoform X11 [Homo sapiens]
 >SarsCov2Spike_Specifiedy_by_Mizuno-san
 humanProteinID =  73209 , srsCov2ProteinID =  0
LVSSQ
GDSSS
LFRKS
SFCTQ
common SCSs =  4
>XP_011515984.1 protein unc-13 homolog B isoform X2 [Homo sapiens]
 >SarsCov2Spike_Specifiedy_by_Mizuno-san
 humanProteinID =  73222 , srsCov2ProteinID =  0
LPLVS
VRDLP
VLPPL
ALQIP
common SCSs =  4
>XP_011515985.1 protein unc-13 homolog B isoform X3 [Homo sapiens]
 >SarsCov2Spike_Specifiedy_by_Mizuno-san
 humanProteinID =  73223 , srsCov2ProteinID =  0
LPLVS
VRDLP
VLPPL
ALQIP
common SCSs =  4
>XP_011516767.1 hemicentin-2 isoform X1 [Homo sapiens]
 >SarsCov2Spike_Specifiedy_by_Mizuno-san
 humanProteinID =  73543 , srsCov2ProteinID =  0
LPLVS
LADAG
SALLA
GAGAA
common SCSs =  4
>XP_011516768.1 hemicentin-2 isoform X2 [Homo sapiens]
 >SarsCov2Spike_Specifiedy_by_Mizuno-san
 humanProteinID =  73544 , srsCov2ProteinID =  0
LPLVS
LADAG
SALLA
GAGAA
common SCSs =  4
>XP_011516769.1 hemicentin-2 isoform X3 [Homo sapiens]
 >SarsCov2Spike_Specifiedy_by_Mizuno-san
 humanProteinID =  73545 , srsCov2ProteinID =  0
LPLVS
LADAG
SALLA
GAGAA
common SCSs =  4
>XP_011516770.1 hemicentin-2 isoform X4 [Homo sapiens]
 >SarsCov2Spike_Specifiedy_by_Mizuno-san
 humanProteinID =  73546 , srsCov2ProteinID =  0
LPLVS
LADAG
SALLA
GAGAA
common SCSs =  4
>XP_011518746.1 neuron navigator 2 isoform X1 [Homo sapiens]
 >SarsCov2Spike_Specifiedy_by_Mizuno-san
 humanProteinID =  74525 , srsCov2ProteinID =  0
MDLEG
TISVT
FNFSQ
RLQSL
common SCSs =  4
>XP_011518747.1 neuron navigator 2 isoform X2 [Homo sapiens]
 >SarsCov2Spike_Specifiedy_by_Mizuno-san
 humanProteinID =  74526 , srsCov2ProteinID =  0
MDLEG
TISVT
FNFSQ
RLQSL
common SCSs =  4
>XP_011518748.1 neuron navigator 2 isoform X5 [Homo sapiens]
 >SarsCov2Spike_Specifiedy_by_Mizuno-san
 humanProteinID =  74527 , srsCov2ProteinID =  0
MDLEG
TISVT
FNFSQ
RLQSL
common SCSs =  4
>XP_011518749.1 neuron navigator 2 isoform X6 [Homo sapiens]
 >SarsCov2Spike_Specifiedy_by_Mizuno-san
 humanProteinID =  74528 , srsCov2ProteinID =  0
MDLEG
TISVT
FNFSQ
RLQSL
common SCSs =  4
>XP_011518750.1 neuron navigator 2 isoform X7 [Homo sapiens]
 >SarsCov2Spike_Specifiedy_by_Mizuno-san
 humanProteinID =  74529 , srsCov2ProteinID =  0
MDLEG
TISVT
FNFSQ
RLQSL
common SCSs =  4
>XP_011518751.1 neuron navigator 2 isoform X8 [Homo sapiens]
 >SarsCov2Spike_Specifiedy_by_Mizuno-san
 humanProteinID =  74530 , srsCov2ProteinID =  0
MDLEG
TISVT
FNFSQ
RLQSL
common SCSs =  4
>XP_011518752.1 neuron navigator 2 isoform X10 [Homo sapiens]
 >SarsCov2Spike_Specifiedy_by_Mizuno-san
 humanProteinID =  74531 , srsCov2ProteinID =  0
MDLEG
TISVT
FNFSQ
RLQSL
common SCSs =  4
>XP_011518753.1 neuron navigator 2 isoform X14 [Homo sapiens]
 >SarsCov2Spike_Specifiedy_by_Mizuno-san
 humanProteinID =  74532 , srsCov2ProteinID =  0
MDLEG
TISVT
FNFSQ
RLQSL
common SCSs =  4
>XP_011519260.1 IQ motif and SEC7 domain-containing protein 3 isoform X1 [Homo sapiens]
 >SarsCov2Spike_Specifiedy_by_Mizuno-san
 humanProteinID =  74773 , srsCov2ProteinID =  0
AGAAA
GAGAA
SALGK
HVTYV
common SCSs =  4
>XP_011520427.1 protein dispatched homolog 2 isoform X1 [Homo sapiens]
 >SarsCov2Spike_Specifiedy_by_Mizuno-san
 humanProteinID =  75380 , srsCov2ProteinID =  0
LLALH
LALHR
GDSSS
TVYDP
common SCSs =  4
>XP_011520551.1 inositol hexakisphosphate and diphosphoinositol-pentakisphosphate kinase 1 isoform X1 [Homo sapiens]
 >SarsCov2Spike_Specifiedy_by_Mizuno-san
 humanProteinID =  75451 , srsCov2ProteinID =  0
DPLSE
RLFRK
DSLSS
EPQII
common SCSs =  4
>XP_011520552.1 inositol hexakisphosphate and diphosphoinositol-pentakisphosphate kinase 1 isoform X1 [Homo sapiens]
 >SarsCov2Spike_Specifiedy_by_Mizuno-san
 humanProteinID =  75452 , srsCov2ProteinID =  0
DPLSE
RLFRK
DSLSS
EPQII
common SCSs =  4
>XP_011520554.1 inositol hexakisphosphate and diphosphoinositol-pentakisphosphate kinase 1 isoform X1 [Homo sapiens]
 >SarsCov2Spike_Specifiedy_by_Mizuno-san
 humanProteinID =  75453 , srsCov2ProteinID =  0
DPLSE
RLFRK
DSLSS
EPQII
common SCSs =  4
>XP_011520556.1 inositol hexakisphosphate and diphosphoinositol-pentakisphosphate kinase 1 isoform X1 [Homo sapiens]
 >SarsCov2Spike_Specifiedy_by_Mizuno-san
 humanProteinID =  75454 , srsCov2ProteinID =  0
DPLSE
RLFRK
DSLSS
EPQII
common SCSs =  4
>XP_011521387.1 carbohydrate sulfotransferase 6 isoform X1 [Homo sapiens]
 >SarsCov2Spike_Specifiedy_by_Mizuno-san
 humanProteinID =  75833 , srsCov2ProteinID =  0
GTNGT
SSTAS
GAISS
AEIRA
common SCSs =  4
>XP_011521448.1 hydrocephalus-inducing protein homolog isoform X1 [Homo sapiens]
 >SarsCov2Spike_Specifiedy_by_Mizuno-san
 humanProteinID =  75850 , srsCov2ProteinID =  0
QLPPA
IYQAG
ILPVS
VLPPL
common SCSs =  4
>XP_011521449.1 hydrocephalus-inducing protein homolog isoform X2 [Homo sapiens]
 >SarsCov2Spike_Specifiedy_by_Mizuno-san
 humanProteinID =  75851 , srsCov2ProteinID =  0
QLPPA
IYQAG
ILPVS
VLPPL
common SCSs =  4
>XP_011521450.1 hydrocephalus-inducing protein homolog isoform X4 [Homo sapiens]
 >SarsCov2Spike_Specifiedy_by_Mizuno-san
 humanProteinID =  75852 , srsCov2ProteinID =  0
QLPPA
IYQAG
ILPVS
VLPPL
common SCSs =  4
>XP_011521453.1 hydrocephalus-inducing protein homolog isoform X5 [Homo sapiens]
 >SarsCov2Spike_Specifiedy_by_Mizuno-san
 humanProteinID =  75853 , srsCov2ProteinID =  0
QLPPA
IYQAG
ILPVS
VLPPL
common SCSs =  4
>XP_011521629.1 transport and Golgi organization protein 6 homolog isoform X1 [Homo sapiens]
 >SarsCov2Spike_Specifiedy_by_Mizuno-san
 humanProteinID =  75964 , srsCov2ProteinID =  0
DLEGK
SVTTE
GDIAA
GAGAA
common SCSs =  4
>XP_011522385.1 nuclear receptor corepressor 1 isoform X1 [Homo sapiens]
 >SarsCov2Spike_Specifiedy_by_Mizuno-san
 humanProteinID =  76336 , srsCov2ProteinID =  0
GTNGT
YNSAS
SVITP
GAENS
common SCSs =  4
>XP_011522386.1 nuclear receptor corepressor 1 isoform X3 [Homo sapiens]
 >SarsCov2Spike_Specifiedy_by_Mizuno-san
 humanProteinID =  76337 , srsCov2ProteinID =  0
GTNGT
YNSAS
SVITP
GAENS
common SCSs =  4
>XP_011522387.1 nuclear receptor corepressor 1 isoform X13 [Homo sapiens]
 >SarsCov2Spike_Specifiedy_by_Mizuno-san
 humanProteinID =  76338 , srsCov2ProteinID =  0
GTNGT
YNSAS
SVITP
GAENS
common SCSs =  4
>XP_011522388.1 nuclear receptor corepressor 1 isoform X16 [Homo sapiens]
 >SarsCov2Spike_Specifiedy_by_Mizuno-san
 humanProteinID =  76339 , srsCov2ProteinID =  0
GTNGT
YNSAS
SVITP
GAENS
common SCSs =  4
>XP_011523216.1 protein sidekick-2 isoform X1 [Homo sapiens]
 >SarsCov2Spike_Specifiedy_by_Mizuno-san
 humanProteinID =  76710 , srsCov2ProteinID =  0
TLLAL
LLALH
RARSV
AENSV
common SCSs =  4
>XP_011523217.1 protein sidekick-2 isoform X2 [Homo sapiens]
 >SarsCov2Spike_Specifiedy_by_Mizuno-san
 humanProteinID =  76711 , srsCov2ProteinID =  0
TLLAL
LLALH
RARSV
AENSV
common SCSs =  4
>XP_011523673.1 ubiquitin carboxyl-terminal hydrolase 32 isoform X1 [Homo sapiens]
 >SarsCov2Spike_Specifiedy_by_Mizuno-san
 humanProteinID =  76945 , srsCov2ProteinID =  0
IIRGW
CSFGG
SSVLN
EKNFT
common SCSs =  4
>XP_011523674.1 ubiquitin carboxyl-terminal hydrolase 32 isoform X2 [Homo sapiens]
 >SarsCov2Spike_Specifiedy_by_Mizuno-san
 humanProteinID =  76946 , srsCov2ProteinID =  0
IIRGW
CSFGG
SSVLN
EKNFT
common SCSs =  4
>XP_011523675.1 ubiquitin carboxyl-terminal hydrolase 32 isoform X3 [Homo sapiens]
 >SarsCov2Spike_Specifiedy_by_Mizuno-san
 humanProteinID =  76947 , srsCov2ProteinID =  0
IIRGW
CSFGG
SSVLN
EKNFT
common SCSs =  4
>XP_011523676.1 ubiquitin carboxyl-terminal hydrolase 32 isoform X4 [Homo sapiens]
 >SarsCov2Spike_Specifiedy_by_Mizuno-san
 humanProteinID =  76948 , srsCov2ProteinID =  0
IIRGW
CSFGG
SSVLN
EKNFT
common SCSs =  4
>XP_011523677.1 ubiquitin carboxyl-terminal hydrolase 32 isoform X5 [Homo sapiens]
 >SarsCov2Spike_Specifiedy_by_Mizuno-san
 humanProteinID =  76949 , srsCov2ProteinID =  0
IIRGW
CSFGG
SSVLN
EKNFT
common SCSs =  4
>XP_011523678.1 ubiquitin carboxyl-terminal hydrolase 32 isoform X6 [Homo sapiens]
 >SarsCov2Spike_Specifiedy_by_Mizuno-san
 humanProteinID =  76950 , srsCov2ProteinID =  0
IIRGW
CSFGG
SSVLN
EKNFT
common SCSs =  4
>XP_011523680.1 ubiquitin carboxyl-terminal hydrolase 32 isoform X7 [Homo sapiens]
 >SarsCov2Spike_Specifiedy_by_Mizuno-san
 humanProteinID =  76951 , srsCov2ProteinID =  0
IIRGW
CSFGG
SSVLN
EKNFT
common SCSs =  4
>XP_011524280.1 laminin subunit alpha-3 isoform X1 [Homo sapiens]
 >SarsCov2Spike_Specifiedy_by_Mizuno-san
 humanProteinID =  77210 , srsCov2ProteinID =  0
LVLLP
EKGIY
SASFS
DLQEL
common SCSs =  4
>XP_011524281.1 laminin subunit alpha-3 isoform X2 [Homo sapiens]
 >SarsCov2Spike_Specifiedy_by_Mizuno-san
 humanProteinID =  77211 , srsCov2ProteinID =  0
LVLLP
EKGIY
SASFS
DLQEL
common SCSs =  4
>XP_011524282.1 laminin subunit alpha-3 isoform X3 [Homo sapiens]
 >SarsCov2Spike_Specifiedy_by_Mizuno-san
 humanProteinID =  77212 , srsCov2ProteinID =  0
LVLLP
EKGIY
SASFS
DLQEL
common SCSs =  4
>XP_011524283.1 laminin subunit alpha-3 isoform X4 [Homo sapiens]
 >SarsCov2Spike_Specifiedy_by_Mizuno-san
 humanProteinID =  77213 , srsCov2ProteinID =  0
LVLLP
EKGIY
SASFS
DLQEL
common SCSs =  4
>XP_011524284.1 laminin subunit alpha-3 isoform X5 [Homo sapiens]
 >SarsCov2Spike_Specifiedy_by_Mizuno-san
 humanProteinID =  77214 , srsCov2ProteinID =  0
LVLLP
EKGIY
SASFS
DLQEL
common SCSs =  4
>XP_011524498.1 FH1/FH2 domain-containing protein 3 isoform X10 [Homo sapiens]
 >SarsCov2Spike_Specifiedy_by_Mizuno-san
 humanProteinID =  77298 , srsCov2ProteinID =  0
GLTVL
LTVLP
TVLPP
DVDLG
common SCSs =  4
>XP_011525184.1 BRD4-interacting chromatin-remodeling complex-associated protein isoform X2 [Homo sapiens]
 >SarsCov2Spike_Specifiedy_by_Mizuno-san
 humanProteinID =  77662 , srsCov2ProteinID =  0
LPPLL
GAGAA
QDVVN
SPDVD
common SCSs =  4
>XP_011525185.1 BRD4-interacting chromatin-remodeling complex-associated protein isoform X3 [Homo sapiens]
 >SarsCov2Spike_Specifiedy_by_Mizuno-san
 humanProteinID =  77663 , srsCov2ProteinID =  0
LPPLL
GAGAA
QDVVN
SPDVD
common SCSs =  4
>XP_011525534.1 pleckstrin homology domain-containing family G member 2 isoform X1 [Homo sapiens]
 >SarsCov2Spike_Specifiedy_by_Mizuno-san
 humanProteinID =  77819 , srsCov2ProteinID =  0
SLSST
RASAN
LQELG
QELGK
common SCSs =  4
>XP_011525656.1 symplekin isoform X1 [Homo sapiens]
 >SarsCov2Spike_Specifiedy_by_Mizuno-san
 humanProteinID =  77883 , srsCov2ProteinID =  0
RSVAS
SVASQ
KLIAN
ILSRL
common SCSs =  4
>XP_011526799.1 transcription factor-like 5 protein isoform X2 [Homo sapiens]
 >SarsCov2Spike_Specifiedy_by_Mizuno-san
 humanProteinID =  78445 , srsCov2ProteinID =  0
AGAAA
LVKNK
SALLA
GAGAA
common SCSs =  4
>XP_011527023.1 nuclear receptor coactivator 6 isoform X4 [Homo sapiens]
 >SarsCov2Spike_Specifiedy_by_Mizuno-san
 humanProteinID =  78549 , srsCov2ProteinID =  0
LDSKT
LPQGF
LQPRT
VPAQE
common SCSs =  4
>XP_011527028.1 nuclear receptor coactivator 6 isoform X6 [Homo sapiens]
 >SarsCov2Spike_Specifiedy_by_Mizuno-san
 humanProteinID =  78550 , srsCov2ProteinID =  0
LDSKT
LPQGF
LQPRT
VPAQE
common SCSs =  4
>XP_011527029.1 nuclear receptor coactivator 6 isoform X7 [Homo sapiens]
 >SarsCov2Spike_Specifiedy_by_Mizuno-san
 humanProteinID =  78551 , srsCov2ProteinID =  0
LDSKT
LPQGF
LQPRT
VPAQE
common SCSs =  4
>XP_011528049.1 nuclear receptor-interacting protein 1 isoform X1 [Homo sapiens]
 >SarsCov2Spike_Specifiedy_by_Mizuno-san
 humanProteinID =  79077 , srsCov2ProteinID =  0
TQSLL
PPLLT
ALLAG
IDRLN
common SCSs =  4
>XP_011528050.1 nuclear receptor-interacting protein 1 isoform X1 [Homo sapiens]
 >SarsCov2Spike_Specifiedy_by_Mizuno-san
 humanProteinID =  79078 , srsCov2ProteinID =  0
TQSLL
PPLLT
ALLAG
IDRLN
common SCSs =  4
>XP_011528051.1 nuclear receptor-interacting protein 1 isoform X1 [Homo sapiens]
 >SarsCov2Spike_Specifiedy_by_Mizuno-san
 humanProteinID =  79079 , srsCov2ProteinID =  0
TQSLL
PPLLT
ALLAG
IDRLN
common SCSs =  4
>XP_011528053.1 nuclear receptor-interacting protein 1 isoform X1 [Homo sapiens]
 >SarsCov2Spike_Specifiedy_by_Mizuno-san
 humanProteinID =  79080 , srsCov2ProteinID =  0
TQSLL
PPLLT
ALLAG
IDRLN
common SCSs =  4
>XP_011528054.1 nuclear receptor-interacting protein 1 isoform X1 [Homo sapiens]
 >SarsCov2Spike_Specifiedy_by_Mizuno-san
 humanProteinID =  79081 , srsCov2ProteinID =  0
TQSLL
PPLLT
ALLAG
IDRLN
common SCSs =  4
>XP_011528099.1 uromodulin-like 1 isoform X3 [Homo sapiens]
 >SarsCov2Spike_Specifiedy_by_Mizuno-san
 humanProteinID =  79097 , srsCov2ProteinID =  0
VIRGD
KSNLK
LGDIA
SNGTH
common SCSs =  4
>XP_011528760.1 unconventional myosin-XVIIIb isoform X1 [Homo sapiens]
 >SarsCov2Spike_Specifiedy_by_Mizuno-san
 humanProteinID =  79448 , srsCov2ProteinID =  0
TVEKG
LPDPS
GFIKQ
SSVLN
common SCSs =  4
>XP_011528761.1 unconventional myosin-XVIIIb isoform X1 [Homo sapiens]
 >SarsCov2Spike_Specifiedy_by_Mizuno-san
 humanProteinID =  79449 , srsCov2ProteinID =  0
TVEKG
LPDPS
GFIKQ
SSVLN
common SCSs =  4
>XP_011528762.1 unconventional myosin-XVIIIb isoform X2 [Homo sapiens]
 >SarsCov2Spike_Specifiedy_by_Mizuno-san
 humanProteinID =  79450 , srsCov2ProteinID =  0
TVEKG
LPDPS
GFIKQ
SSVLN
common SCSs =  4
>XP_011528763.1 unconventional myosin-XVIIIb isoform X1 [Homo sapiens]
 >SarsCov2Spike_Specifiedy_by_Mizuno-san
 humanProteinID =  79451 , srsCov2ProteinID =  0
TVEKG
LPDPS
GFIKQ
SSVLN
common SCSs =  4
>XP_011528766.1 unconventional myosin-XVIIIb isoform X3 [Homo sapiens]
 >SarsCov2Spike_Specifiedy_by_Mizuno-san
 humanProteinID =  79452 , srsCov2ProteinID =  0
TVEKG
LPDPS
GFIKQ
SSVLN
common SCSs =  4
>XP_011528768.1 unconventional myosin-XVIIIb isoform X7 [Homo sapiens]
 >SarsCov2Spike_Specifiedy_by_Mizuno-san
 humanProteinID =  79454 , srsCov2ProteinID =  0
TVEKG
LPDPS
GFIKQ
SSVLN
common SCSs =  4
>XP_011529104.1 serine/threonine-protein kinase WNK3 isoform X3 [Homo sapiens]
 >SarsCov2Spike_Specifiedy_by_Mizuno-san
 humanProteinID =  79586 , srsCov2ProteinID =  0
DSKTQ
SKTQS
SVAYS
FNKVT
common SCSs =  4
>XP_011529212.1 protocadherin-11 X-linked isoform X2 [Homo sapiens]
 >SarsCov2Spike_Specifiedy_by_Mizuno-san
 humanProteinID =  79629 , srsCov2ProteinID =  0
ALHRS
AGTIT
AQEKN
DNTFV
common SCSs =  4
>XP_011529213.1 protocadherin-11 X-linked isoform X2 [Homo sapiens]
 >SarsCov2Spike_Specifiedy_by_Mizuno-san
 humanProteinID =  79630 , srsCov2ProteinID =  0
ALHRS
AGTIT
AQEKN
DNTFV
common SCSs =  4
>XP_011529214.1 protocadherin-11 X-linked isoform X3 [Homo sapiens]
 >SarsCov2Spike_Specifiedy_by_Mizuno-san
 humanProteinID =  79631 , srsCov2ProteinID =  0
ALHRS
AGTIT
AQEKN
DNTFV
common SCSs =  4
>XP_011529215.1 protocadherin-11 X-linked isoform X5 [Homo sapiens]
 >SarsCov2Spike_Specifiedy_by_Mizuno-san
 humanProteinID =  79632 , srsCov2ProteinID =  0
ALHRS
AGTIT
AQEKN
DNTFV
common SCSs =  4
>XP_011529216.1 protocadherin-11 X-linked isoform X6 [Homo sapiens]
 >SarsCov2Spike_Specifiedy_by_Mizuno-san
 humanProteinID =  79633 , srsCov2ProteinID =  0
ALHRS
AGTIT
AQEKN
DNTFV
common SCSs =  4
>XP_011530360.2 la-related protein 1B isoform X3 [Homo sapiens]
 >SarsCov2Spike_Specifiedy_by_Mizuno-san
 humanProteinID =  80226 , srsCov2ProteinID =  0
SKTQS
EVPVA
NSPRR
LPPLL
common SCSs =  4
>XP_011530361.2 la-related protein 1B isoform X4 [Homo sapiens]
 >SarsCov2Spike_Specifiedy_by_Mizuno-san
 humanProteinID =  80227 , srsCov2ProteinID =  0
SKTQS
EVPVA
NSPRR
LPPLL
common SCSs =  4
>XP_011530362.2 la-related protein 1B isoform X6 [Homo sapiens]
 >SarsCov2Spike_Specifiedy_by_Mizuno-san
 humanProteinID =  80228 , srsCov2ProteinID =  0
SKTQS
EVPVA
NSPRR
LPPLL
common SCSs =  4
>XP_011530363.1 la-related protein 1B isoform X7 [Homo sapiens]
 >SarsCov2Spike_Specifiedy_by_Mizuno-san
 humanProteinID =  80229 , srsCov2ProteinID =  0
SKTQS
EVPVA
NSPRR
LPPLL
common SCSs =  4
>XP_011530364.2 la-related protein 1B isoform X8 [Homo sapiens]
 >SarsCov2Spike_Specifiedy_by_Mizuno-san
 humanProteinID =  80230 , srsCov2ProteinID =  0
SKTQS
EVPVA
NSPRR
LPPLL
common SCSs =  4
>XP_011530365.2 la-related protein 1B isoform X9 [Homo sapiens]
 >SarsCov2Spike_Specifiedy_by_Mizuno-san
 humanProteinID =  80231 , srsCov2ProteinID =  0
SKTQS
EVPVA
NSPRR
LPPLL
common SCSs =  4
>XP_011530366.2 la-related protein 1B isoform X10 [Homo sapiens]
 >SarsCov2Spike_Specifiedy_by_Mizuno-san
 humanProteinID =  80232 , srsCov2ProteinID =  0
SKTQS
EVPVA
NSPRR
LPPLL
common SCSs =  4
>XP_011530367.1 la-related protein 1B isoform X11 [Homo sapiens]
 >SarsCov2Spike_Specifiedy_by_Mizuno-san
 humanProteinID =  80233 , srsCov2ProteinID =  0
SKTQS
EVPVA
NSPRR
LPPLL
common SCSs =  4
>XP_011530951.1 dynein heavy chain 6, axonemal isoform X1 [Homo sapiens]
 >SarsCov2Spike_Specifiedy_by_Mizuno-san
 humanProteinID =  80493 , srsCov2ProteinID =  0
NPVLP
SALEP
DFGGF
PSKRS
common SCSs =  4
>XP_011530952.1 dynein heavy chain 6, axonemal isoform X1 [Homo sapiens]
 >SarsCov2Spike_Specifiedy_by_Mizuno-san
 humanProteinID =  80494 , srsCov2ProteinID =  0
NPVLP
SALEP
DFGGF
PSKRS
common SCSs =  4
>XP_011530954.1 dynein heavy chain 6, axonemal isoform X2 [Homo sapiens]
 >SarsCov2Spike_Specifiedy_by_Mizuno-san
 humanProteinID =  80495 , srsCov2ProteinID =  0
NPVLP
SALEP
DFGGF
PSKRS
common SCSs =  4
>XP_011530955.1 dynein heavy chain 6, axonemal isoform X3 [Homo sapiens]
 >SarsCov2Spike_Specifiedy_by_Mizuno-san
 humanProteinID =  80496 , srsCov2ProteinID =  0
NPVLP
SALEP
DFGGF
PSKRS
common SCSs =  4
>XP_011530956.1 dynein heavy chain 6, axonemal isoform X5 [Homo sapiens]
 >SarsCov2Spike_Specifiedy_by_Mizuno-san
 humanProteinID =  80497 , srsCov2ProteinID =  0
NPVLP
SALEP
DFGGF
PSKRS
common SCSs =  4
>XP_011530957.1 dynein heavy chain 6, axonemal isoform X6 [Homo sapiens]
 >SarsCov2Spike_Specifiedy_by_Mizuno-san
 humanProteinID =  80498 , srsCov2ProteinID =  0
NPVLP
SALEP
DFGGF
PSKRS
common SCSs =  4
>XP_011530959.1 dynein heavy chain 6, axonemal isoform X7 [Homo sapiens]
 >SarsCov2Spike_Specifiedy_by_Mizuno-san
 humanProteinID =  80499 , srsCov2ProteinID =  0
NPVLP
SALEP
DFGGF
PSKRS
common SCSs =  4
>XP_011531305.1 baculoviral IAP repeat-containing protein 6 isoform X14 [Homo sapiens]
 >SarsCov2Spike_Specifiedy_by_Mizuno-san
 humanProteinID =  80682 , srsCov2ProteinID =  0
LTPGD
TLEIL
RRARS
GTITS
common SCSs =  4
>XP_011531307.1 baculoviral IAP repeat-containing protein 6 isoform X16 [Homo sapiens]
 >SarsCov2Spike_Specifiedy_by_Mizuno-san
 humanProteinID =  80683 , srsCov2ProteinID =  0
TLEIL
RRARS
GTITS
GAGAA
common SCSs =  4
>XP_011531769.1 dynein heavy chain 12, axonemal isoform X2 [Homo sapiens]
 >SarsCov2Spike_Specifiedy_by_Mizuno-san
 humanProteinID =  80894 , srsCov2ProteinID =  0
PLVSS
FLMDL
LSETK
KNLNE
common SCSs =  4
>XP_011531770.1 dynein heavy chain 12, axonemal isoform X3 [Homo sapiens]
 >SarsCov2Spike_Specifiedy_by_Mizuno-san
 humanProteinID =  80895 , srsCov2ProteinID =  0
PLVSS
FLMDL
LSETK
KNLNE
common SCSs =  4
>XP_011531771.1 dynein heavy chain 12, axonemal isoform X4 [Homo sapiens]
 >SarsCov2Spike_Specifiedy_by_Mizuno-san
 humanProteinID =  80896 , srsCov2ProteinID =  0
PLVSS
FLMDL
LSETK
KNLNE
common SCSs =  4
>XP_011532005.1 microtubule-associated protein 4 isoform X2 [Homo sapiens]
 >SarsCov2Spike_Specifiedy_by_Mizuno-san
 humanProteinID =  80997 , srsCov2ProteinID =  0
PLSET
SPTKL
KPSKR
PSKRS
common SCSs =  4
>XP_011532006.1 microtubule-associated protein 4 isoform X3 [Homo sapiens]
 >SarsCov2Spike_Specifiedy_by_Mizuno-san
 humanProteinID =  80998 , srsCov2ProteinID =  0
PLSET
SPTKL
KPSKR
PSKRS
common SCSs =  4
>XP_011532007.1 microtubule-associated protein 4 isoform X5 [Homo sapiens]
 >SarsCov2Spike_Specifiedy_by_Mizuno-san
 humanProteinID =  80999 , srsCov2ProteinID =  0
PLSET
SPTKL
KPSKR
PSKRS
common SCSs =  4
>XP_011532010.1 microtubule-associated protein 4 isoform X7 [Homo sapiens]
 >SarsCov2Spike_Specifiedy_by_Mizuno-san
 humanProteinID =  81000 , srsCov2ProteinID =  0
PLSET
SPTKL
KPSKR
PSKRS
common SCSs =  4
>XP_011532011.1 microtubule-associated protein 4 isoform X9 [Homo sapiens]
 >SarsCov2Spike_Specifiedy_by_Mizuno-san
 humanProteinID =  81001 , srsCov2ProteinID =  0
PLSET
SPTKL
KPSKR
PSKRS
common SCSs =  4
>XP_011532020.1 microtubule-associated protein 4 isoform X14 [Homo sapiens]
 >SarsCov2Spike_Specifiedy_by_Mizuno-san
 humanProteinID =  81002 , srsCov2ProteinID =  0
PLSET
SPTKL
KPSKR
PSKRS
common SCSs =  4
>XP_011532222.1 histone-lysine N-methyltransferase SETD5 isoform X1 [Homo sapiens]
 >SarsCov2Spike_Specifiedy_by_Mizuno-san
 humanProteinID =  81081 , srsCov2ProteinID =  0
STGSN
GDIAA
AARDL
SLSST
common SCSs =  4
>XP_011532223.1 histone-lysine N-methyltransferase SETD5 isoform X1 [Homo sapiens]
 >SarsCov2Spike_Specifiedy_by_Mizuno-san
 humanProteinID =  81082 , srsCov2ProteinID =  0
STGSN
GDIAA
AARDL
SLSST
common SCSs =  4
>XP_011532229.1 histone-lysine N-methyltransferase SETD5 isoform X5 [Homo sapiens]
 >SarsCov2Spike_Specifiedy_by_Mizuno-san
 humanProteinID =  81084 , srsCov2ProteinID =  0
STGSN
GDIAA
AARDL
SLSST
common SCSs =  4
>XP_011532232.1 histone-lysine N-methyltransferase SETD5 isoform X12 [Homo sapiens]
 >SarsCov2Spike_Specifiedy_by_Mizuno-san
 humanProteinID =  81086 , srsCov2ProteinID =  0
STGSN
GDIAA
AARDL
SLSST
common SCSs =  4
>XP_011532234.1 histone-lysine N-methyltransferase SETD5 isoform X17 [Homo sapiens]
 >SarsCov2Spike_Specifiedy_by_Mizuno-san
 humanProteinID =  81087 , srsCov2ProteinID =  0
STGSN
GDIAA
AARDL
SLSST
common SCSs =  4
>XP_011532235.1 histone-lysine N-methyltransferase SETD5 isoform X17 [Homo sapiens]
 >SarsCov2Spike_Specifiedy_by_Mizuno-san
 humanProteinID =  81088 , srsCov2ProteinID =  0
STGSN
GDIAA
AARDL
SLSST
common SCSs =  4
>XP_011533348.1 neurobeachin isoform X10 [Homo sapiens]
 >SarsCov2Spike_Specifiedy_by_Mizuno-san
 humanProteinID =  81617 , srsCov2ProteinID =  0
FRVYS
RVYST
VNQNA
DEDDS
common SCSs =  4
>XP_011533426.1 M-phase phosphoprotein 8 isoform X1 [Homo sapiens]
 >SarsCov2Spike_Specifiedy_by_Mizuno-san
 humanProteinID =  81636 , srsCov2ProteinID =  0
TGVLT
SSVLN
SVLND
EDDSE
common SCSs =  4
>XP_011533937.1 midasin isoform X1 [Homo sapiens]
 >SarsCov2Spike_Specifiedy_by_Mizuno-san
 humanProteinID =  81870 , srsCov2ProteinID =  0
LLALH
LNRAL
KPSKR
AISSV
common SCSs =  4
>XP_011534058.1 filamin-A-interacting protein 1 isoform X3 [Homo sapiens]
 >SarsCov2Spike_Specifiedy_by_Mizuno-san
 humanProteinID =  81936 , srsCov2ProteinID =  0
RSSVL
LKSFT
KSFTV
DYSVL
common SCSs =  4
>XP_011534079.1 glutamate receptor ionotropic, kainate 2 isoform X2 [Homo sapiens]
 >SarsCov2Spike_Specifiedy_by_Mizuno-san
 humanProteinID =  81944 , srsCov2ProteinID =  0
ASALG
ANLAA
FVTQR
VTQRN
common SCSs =  4
>XP_011534122.1 laminin subunit alpha-2 isoform X2 [Homo sapiens]
 >SarsCov2Spike_Specifiedy_by_Mizuno-san
 humanProteinID =  81962 , srsCov2ProteinID =  0
FGGVS
GKIQD
LNTLV
QKEID
common SCSs =  4
>XP_011534220.1 PH-interacting protein isoform X2 [Homo sapiens]
 >SarsCov2Spike_Specifiedy_by_Mizuno-san
 humanProteinID =  81997 , srsCov2ProteinID =  0
PSKRS
ALNTL
ISSVL
EDDSE
common SCSs =  4
>XP_011534268.1 NHS-like protein 1 isoform X1 [Homo sapiens]
 >SarsCov2Spike_Specifiedy_by_Mizuno-san
 humanProteinID =  82027 , srsCov2ProteinID =  0
IAIPT
NIQKE
LNESL
NESLI
common SCSs =  4
>XP_011534269.1 NHS-like protein 1 isoform X1 [Homo sapiens]
 >SarsCov2Spike_Specifiedy_by_Mizuno-san
 humanProteinID =  82028 , srsCov2ProteinID =  0
IAIPT
NIQKE
LNESL
NESLI
common SCSs =  4
>XP_011534271.1 NHS-like protein 1 isoform X5 [Homo sapiens]
 >SarsCov2Spike_Specifiedy_by_Mizuno-san
 humanProteinID =  82030 , srsCov2ProteinID =  0
IAIPT
NIQKE
LNESL
NESLI
common SCSs =  4
>XP_011534272.1 NHS-like protein 1 isoform X6 [Homo sapiens]
 >SarsCov2Spike_Specifiedy_by_Mizuno-san
 humanProteinID =  82031 , srsCov2ProteinID =  0
IAIPT
NIQKE
LNESL
NESLI
common SCSs =  4
>XP_011534273.1 NHS-like protein 1 isoform X8 [Homo sapiens]
 >SarsCov2Spike_Specifiedy_by_Mizuno-san
 humanProteinID =  82032 , srsCov2ProteinID =  0
IAIPT
NIQKE
LNESL
NESLI
common SCSs =  4
>XP_011534274.1 NHS-like protein 1 isoform X9 [Homo sapiens]
 >SarsCov2Spike_Specifiedy_by_Mizuno-san
 humanProteinID =  82033 , srsCov2ProteinID =  0
IAIPT
NIQKE
LNESL
NESLI
common SCSs =  4
>XP_011534275.1 NHS-like protein 1 isoform X10 [Homo sapiens]
 >SarsCov2Spike_Specifiedy_by_Mizuno-san
 humanProteinID =  82034 , srsCov2ProteinID =  0
IAIPT
NIQKE
LNESL
NESLI
common SCSs =  4
>XP_011534276.1 NHS-like protein 1 isoform X11 [Homo sapiens]
 >SarsCov2Spike_Specifiedy_by_Mizuno-san
 humanProteinID =  82035 , srsCov2ProteinID =  0
IAIPT
NIQKE
LNESL
NESLI
common SCSs =  4
>XP_011534278.1 NHS-like protein 1 isoform X13 [Homo sapiens]
 >SarsCov2Spike_Specifiedy_by_Mizuno-san
 humanProteinID =  82036 , srsCov2ProteinID =  0
IAIPT
NIQKE
LNESL
NESLI
common SCSs =  4
>XP_011534338.1 DNA polymerase zeta catalytic subunit isoform X6 [Homo sapiens]
 >SarsCov2Spike_Specifiedy_by_Mizuno-san
 humanProteinID =  82067 , srsCov2ProteinID =  0
DSSSG
EILPV
ILPVS
SLSST
common SCSs =  4
>XP_011534921.1 E3 ubiquitin-protein ligase HECTD1 isoform X2 [Homo sapiens]
 >SarsCov2Spike_Specifiedy_by_Mizuno-san
 humanProteinID =  82365 , srsCov2ProteinID =  0
LVDLP
VDLPI
PRTFL
DILSR
common SCSs =  4
>XP_011534923.1 E3 ubiquitin-protein ligase HECTD1 isoform X6 [Homo sapiens]
 >SarsCov2Spike_Specifiedy_by_Mizuno-san
 humanProteinID =  82366 , srsCov2ProteinID =  0
LVDLP
VDLPI
PRTFL
DILSR
common SCSs =  4
>XP_011534932.1 signal-induced proliferation-associated 1-like protein 1 isoform X1 [Homo sapiens]
 >SarsCov2Spike_Specifiedy_by_Mizuno-san
 humanProteinID =  82372 , srsCov2ProteinID =  0
SASFS
QAGST
AGSTP
DSLSS
common SCSs =  4
>XP_011534933.1 signal-induced proliferation-associated 1-like protein 1 isoform X1 [Homo sapiens]
 >SarsCov2Spike_Specifiedy_by_Mizuno-san
 humanProteinID =  82373 , srsCov2ProteinID =  0
SASFS
QAGST
AGSTP
DSLSS
common SCSs =  4
>XP_011534934.1 signal-induced proliferation-associated 1-like protein 1 isoform X1 [Homo sapiens]
 >SarsCov2Spike_Specifiedy_by_Mizuno-san
 humanProteinID =  82374 , srsCov2ProteinID =  0
SASFS
QAGST
AGSTP
DSLSS
common SCSs =  4
>XP_011534937.1 signal-induced proliferation-associated 1-like protein 1 isoform X1 [Homo sapiens]
 >SarsCov2Spike_Specifiedy_by_Mizuno-san
 humanProteinID =  82375 , srsCov2ProteinID =  0
SASFS
QAGST
AGSTP
DSLSS
common SCSs =  4
>XP_011536375.1 WASH complex subunit 4 isoform X1 [Homo sapiens]
 >SarsCov2Spike_Specifiedy_by_Mizuno-san
 humanProteinID =  83046 , srsCov2ProteinID =  0
LKPFE
GGVSV
MTKTS
TKTSV
common SCSs =  4
>XP_011536376.1 WASH complex subunit 4 isoform X2 [Homo sapiens]
 >SarsCov2Spike_Specifiedy_by_Mizuno-san
 humanProteinID =  83047 , srsCov2ProteinID =  0
LKPFE
GGVSV
MTKTS
TKTSV
common SCSs =  4
>XP_011536379.1 WASH complex subunit 4 isoform X4 [Homo sapiens]
 >SarsCov2Spike_Specifiedy_by_Mizuno-san
 humanProteinID =  83048 , srsCov2ProteinID =  0
LKPFE
GGVSV
MTKTS
TKTSV
common SCSs =  4
>XP_011537056.1 A disintegrin and metalloproteinase with thrombospondin motifs 20 isoform X1 [Homo sapiens]
 >SarsCov2Spike_Specifiedy_by_Mizuno-san
 humanProteinID =  83360 , srsCov2ProteinID =  0
FGEVF
GLTGT
TPCSF
DISGI
common SCSs =  4
>XP_011537242.1 neuron navigator 3 isoform X4 [Homo sapiens]
 >SarsCov2Spike_Specifiedy_by_Mizuno-san
 humanProteinID =  83458 , srsCov2ProteinID =  0
TITSG
TGRLQ
GRLQS
RLQSL
common SCSs =  4
>XP_011537243.1 neuron navigator 3 isoform X5 [Homo sapiens]
 >SarsCov2Spike_Specifiedy_by_Mizuno-san
 humanProteinID =  83459 , srsCov2ProteinID =  0
TITSG
TGRLQ
GRLQS
RLQSL
common SCSs =  4
>XP_011537246.1 neuron navigator 3 isoform X10 [Homo sapiens]
 >SarsCov2Spike_Specifiedy_by_Mizuno-san
 humanProteinID =  83460 , srsCov2ProteinID =  0
TITSG
TGRLQ
GRLQS
RLQSL
common SCSs =  4
>XP_011537442.1 sorbin and SH3 domain-containing protein 1 isoform X1 [Homo sapiens]
 >SarsCov2Spike_Specifiedy_by_Mizuno-san
 humanProteinID =  83531 , srsCov2ProteinID =  0
STQDL
FNFNG
RSVAS
DIAAR
common SCSs =  4
>XP_011537452.1 sorbin and SH3 domain-containing protein 1 isoform X2 [Homo sapiens]
 >SarsCov2Spike_Specifiedy_by_Mizuno-san
 humanProteinID =  83532 , srsCov2ProteinID =  0
STQDL
FNFNG
RSVAS
DIAAR
common SCSs =  4
>XP_011537457.1 sorbin and SH3 domain-containing protein 1 isoform X3 [Homo sapiens]
 >SarsCov2Spike_Specifiedy_by_Mizuno-san
 humanProteinID =  83533 , srsCov2ProteinID =  0
STQDL
FNFNG
RSVAS
DIAAR
common SCSs =  4
>XP_011537469.1 sorbin and SH3 domain-containing protein 1 isoform X13 [Homo sapiens]
 >SarsCov2Spike_Specifiedy_by_Mizuno-san
 humanProteinID =  83534 , srsCov2ProteinID =  0
STQDL
FNFNG
RSVAS
DIAAR
common SCSs =  4
>XP_011537501.1 VPS10 domain-containing receptor SorCS1 isoform X2 [Homo sapiens]
 >SarsCov2Spike_Specifiedy_by_Mizuno-san
 humanProteinID =  83539 , srsCov2ProteinID =  0
TRGVY
PLVDL
SALLA
ALLAG
common SCSs =  4
>XP_011537870.1 WASH complex subunit 2C isoform X2 [Homo sapiens]
 >SarsCov2Spike_Specifiedy_by_Mizuno-san
 humanProteinID =  83708 , srsCov2ProteinID =  0
SKPSK
IGKIQ
PDVDL
EPVLK
common SCSs =  4
>XP_011537871.1 WASH complex subunit 2C isoform X6 [Homo sapiens]
 >SarsCov2Spike_Specifiedy_by_Mizuno-san
 humanProteinID =  83709 , srsCov2ProteinID =  0
SKPSK
IGKIQ
PDVDL
EPVLK
common SCSs =  4
>XP_011537872.1 WASH complex subunit 2C isoform X8 [Homo sapiens]
 >SarsCov2Spike_Specifiedy_by_Mizuno-san
 humanProteinID =  83710 , srsCov2ProteinID =  0
SKPSK
IGKIQ
PDVDL
EPVLK
common SCSs =  4
>XP_011538050.1 lipase member M isoform X1 [Homo sapiens]
 >SarsCov2Spike_Specifiedy_by_Mizuno-san
 humanProteinID =  83797 , srsCov2ProteinID =  0
YYVGY
ASVYA
LADAG
ADAGF
common SCSs =  4
>XP_011538151.1 1-phosphatidylinositol 4,5-bisphosphate phosphodiesterase epsilon-1 isoform X1 [Homo sapiens]
 >SarsCov2Spike_Specifiedy_by_Mizuno-san
 humanProteinID =  83842 , srsCov2ProteinID =  0
VADYS
RQIAP
AKNLN
LIDLQ
common SCSs =  4
>XP_011538292.1 WD repeat- and FYVE domain-containing protein 4 isoform X4 [Homo sapiens]
 >SarsCov2Spike_Specifiedy_by_Mizuno-san
 humanProteinID =  83906 , srsCov2ProteinID =  0
STQDL
QSLLI
EDDSE
DDSEP
common SCSs =  4
>XP_011538293.1 WD repeat- and FYVE domain-containing protein 4 isoform X5 [Homo sapiens]
 >SarsCov2Spike_Specifiedy_by_Mizuno-san
 humanProteinID =  83907 , srsCov2ProteinID =  0
STQDL
QSLLI
EDDSE
DDSEP
common SCSs =  4
>XP_011538294.1 WD repeat- and FYVE domain-containing protein 4 isoform X7 [Homo sapiens]
 >SarsCov2Spike_Specifiedy_by_Mizuno-san
 humanProteinID =  83908 , srsCov2ProteinID =  0
STQDL
QSLLI
EDDSE
DDSEP
common SCSs =  4
>XP_011538643.1 disks large homolog 5 isoform X2 [Homo sapiens]
 >SarsCov2Spike_Specifiedy_by_Mizuno-san
 humanProteinID =  84063 , srsCov2ProteinID =  0
PPLLT
PLLTD
LSSTA
LQSLQ
common SCSs =  4
>XP_011538644.1 disks large homolog 5 isoform X3 [Homo sapiens]
 >SarsCov2Spike_Specifiedy_by_Mizuno-san
 humanProteinID =  84064 , srsCov2ProteinID =  0
PPLLT
PLLTD
LSSTA
LQSLQ
common SCSs =  4
>XP_011538646.1 disks large homolog 5 isoform X6 [Homo sapiens]
 >SarsCov2Spike_Specifiedy_by_Mizuno-san
 humanProteinID =  84065 , srsCov2ProteinID =  0
PPLLT
PLLTD
LSSTA
LQSLQ
common SCSs =  4
>XP_011538648.1 disks large homolog 5 isoform X8 [Homo sapiens]
 >SarsCov2Spike_Specifiedy_by_Mizuno-san
 humanProteinID =  84067 , srsCov2ProteinID =  0
PPLLT
PLLTD
LSSTA
LQSLQ
common SCSs =  4
>XP_011539082.1 coiled-coil domain-containing protein 27 isoform X4 [Homo sapiens]
 >SarsCov2Spike_Specifiedy_by_Mizuno-san
 humanProteinID =  84258 , srsCov2ProteinID =  0
TQDLF
QDLFL
SVASQ
VASQS
common SCSs =  4
>XP_011539114.1 coiled-coil domain-containing protein 17 isoform X1 [Homo sapiens]
 >SarsCov2Spike_Specifiedy_by_Mizuno-san
 humanProteinID =  84274 , srsCov2ProteinID =  0
VFRSS
SALLA
AAEIR
AEIRA
common SCSs =  4
>XP_011539116.1 coiled-coil domain-containing protein 17 isoform X3 [Homo sapiens]
 >SarsCov2Spike_Specifiedy_by_Mizuno-san
 humanProteinID =  84275 , srsCov2ProteinID =  0
VFRSS
SALLA
AAEIR
AEIRA
common SCSs =  4
>XP_011539122.1 coiled-coil domain-containing protein 17 isoform X9 [Homo sapiens]
 >SarsCov2Spike_Specifiedy_by_Mizuno-san
 humanProteinID =  84276 , srsCov2ProteinID =  0
VFRSS
SALLA
AAEIR
AEIRA
common SCSs =  4
>XP_011539279.2 homeodomain-interacting protein kinase 1 isoform X4 [Homo sapiens]
 >SarsCov2Spike_Specifiedy_by_Mizuno-san
 humanProteinID =  84366 , srsCov2ProteinID =  0
GCVIA
QPYRV
VSVIT
ILSRL
common SCSs =  4
>XP_011539557.1 AT-hook DNA-binding motif-containing protein 1 isoform X1 [Homo sapiens]
 >SarsCov2Spike_Specifiedy_by_Mizuno-san
 humanProteinID =  84513 , srsCov2ProteinID =  0
ALEPL
ALDPL
PSKRS
FKEEL
common SCSs =  4
>XP_011539558.1 AT-hook DNA-binding motif-containing protein 1 isoform X1 [Homo sapiens]
 >SarsCov2Spike_Specifiedy_by_Mizuno-san
 humanProteinID =  84514 , srsCov2ProteinID =  0
ALEPL
ALDPL
PSKRS
FKEEL
common SCSs =  4
>XP_011539559.1 AT-hook DNA-binding motif-containing protein 1 isoform X1 [Homo sapiens]
 >SarsCov2Spike_Specifiedy_by_Mizuno-san
 humanProteinID =  84515 , srsCov2ProteinID =  0
ALEPL
ALDPL
PSKRS
FKEEL
common SCSs =  4
>XP_011539841.1 enoyl-[acyl-carrier-protein] reductase, mitochondrial isoform X1 [Homo sapiens]
 >SarsCov2Spike_Specifiedy_by_Mizuno-san
 humanProteinID =  84650 , srsCov2ProteinID =  0
QSLLI
HAPAT
GAEHV
SLGAE
common SCSs =  4
>XP_011539842.1 enoyl-[acyl-carrier-protein] reductase, mitochondrial isoform X2 [Homo sapiens]
 >SarsCov2Spike_Specifiedy_by_Mizuno-san
 humanProteinID =  84651 , srsCov2ProteinID =  0
QSLLI
HAPAT
GAEHV
SLGAE
common SCSs =  4
>XP_011539845.1 enoyl-[acyl-carrier-protein] reductase, mitochondrial isoform X4 [Homo sapiens]
 >SarsCov2Spike_Specifiedy_by_Mizuno-san
 humanProteinID =  84653 , srsCov2ProteinID =  0
QSLLI
HAPAT
GAEHV
SLGAE
common SCSs =  4
>XP_011539847.1 enoyl-[acyl-carrier-protein] reductase, mitochondrial isoform X4 [Homo sapiens]
 >SarsCov2Spike_Specifiedy_by_Mizuno-san
 humanProteinID =  84654 , srsCov2ProteinID =  0
QSLLI
HAPAT
GAEHV
SLGAE
common SCSs =  4
>XP_011539848.1 enoyl-[acyl-carrier-protein] reductase, mitochondrial isoform X4 [Homo sapiens]
 >SarsCov2Spike_Specifiedy_by_Mizuno-san
 humanProteinID =  84655 , srsCov2ProteinID =  0
QSLLI
HAPAT
GAEHV
SLGAE
common SCSs =  4
>XP_011539849.1 enoyl-[acyl-carrier-protein] reductase, mitochondrial isoform X4 [Homo sapiens]
 >SarsCov2Spike_Specifiedy_by_Mizuno-san
 humanProteinID =  84656 , srsCov2ProteinID =  0
QSLLI
HAPAT
GAEHV
SLGAE
common SCSs =  4
>XP_011539851.1 enoyl-[acyl-carrier-protein] reductase, mitochondrial isoform X4 [Homo sapiens]
 >SarsCov2Spike_Specifiedy_by_Mizuno-san
 humanProteinID =  84657 , srsCov2ProteinID =  0
QSLLI
HAPAT
GAEHV
SLGAE
common SCSs =  4
>XP_011539852.1 enoyl-[acyl-carrier-protein] reductase, mitochondrial isoform X4 [Homo sapiens]
 >SarsCov2Spike_Specifiedy_by_Mizuno-san
 humanProteinID =  84658 , srsCov2ProteinID =  0
QSLLI
HAPAT
GAEHV
SLGAE
common SCSs =  4
>XP_011539855.1 enoyl-[acyl-carrier-protein] reductase, mitochondrial isoform X4 [Homo sapiens]
 >SarsCov2Spike_Specifiedy_by_Mizuno-san
 humanProteinID =  84659 , srsCov2ProteinID =  0
QSLLI
HAPAT
GAEHV
SLGAE
common SCSs =  4
>XP_011539856.1 enoyl-[acyl-carrier-protein] reductase, mitochondrial isoform X4 [Homo sapiens]
 >SarsCov2Spike_Specifiedy_by_Mizuno-san
 humanProteinID =  84660 , srsCov2ProteinID =  0
QSLLI
HAPAT
GAEHV
SLGAE
common SCSs =  4
>XP_011541077.1 glutamate receptor 4 isoform X3 [Homo sapiens]
 >SarsCov2Spike_Specifiedy_by_Mizuno-san
 humanProteinID =  85132 , srsCov2ProteinID =  0
NLDSK
KVGGN
YTSAL
ANLAA
common SCSs =  4
>XP_011541078.1 glutamate receptor 4 isoform X6 [Homo sapiens]
 >SarsCov2Spike_Specifiedy_by_Mizuno-san
 humanProteinID =  85133 , srsCov2ProteinID =  0
NLDSK
KVGGN
YTSAL
ANLAA
common SCSs =  4
>XP_011541079.1 glutamate receptor 4 isoform X6 [Homo sapiens]
 >SarsCov2Spike_Specifiedy_by_Mizuno-san
 humanProteinID =  85134 , srsCov2ProteinID =  0
NLDSK
KVGGN
YTSAL
ANLAA
common SCSs =  4
>XP_011541135.1 histone-lysine N-methyltransferase 2A isoform X4 [Homo sapiens]
 >SarsCov2Spike_Specifiedy_by_Mizuno-san
 humanProteinID =  85165 , srsCov2ProteinID =  0
QVAVL
VNCTE
VVNQN
SSVLN
common SCSs =  4
>XP_011541514.1 dmX-like protein 1 isoform X1 [Homo sapiens]
 >SarsCov2Spike_Specifiedy_by_Mizuno-san
 humanProteinID =  85351 , srsCov2ProteinID =  0
GEVFN
GLTVL
LAGTI
LNESL
common SCSs =  4
>XP_011541515.1 dmX-like protein 1 isoform X1 [Homo sapiens]
 >SarsCov2Spike_Specifiedy_by_Mizuno-san
 humanProteinID =  85352 , srsCov2ProteinID =  0
GEVFN
GLTVL
LAGTI
LNESL
common SCSs =  4
>XP_011541516.1 dmX-like protein 1 isoform X6 [Homo sapiens]
 >SarsCov2Spike_Specifiedy_by_Mizuno-san
 humanProteinID =  85353 , srsCov2ProteinID =  0
GEVFN
GLTVL
LAGTI
LNESL
common SCSs =  4
>XP_011541517.1 dmX-like protein 1 isoform X6 [Homo sapiens]
 >SarsCov2Spike_Specifiedy_by_Mizuno-san
 humanProteinID =  85354 , srsCov2ProteinID =  0
GEVFN
GLTVL
LAGTI
LNESL
common SCSs =  4
>XP_011544050.2 otoancorin isoform X1 [Homo sapiens]
 >SarsCov2Spike_Specifiedy_by_Mizuno-san
 humanProteinID =  86630 , srsCov2ProteinID =  0
SEFRV
ALLAG
LQSLQ
LQELG
common SCSs =  4
>XP_011544071.1 serine/threonine-protein kinase SMG1 isoform X2 [Homo sapiens]
 >SarsCov2Spike_Specifiedy_by_Mizuno-san
 humanProteinID =  86642 , srsCov2ProteinID =  0
AVRDP
LLLQY
LVKQL
VYDPL
common SCSs =  4
>XP_016855891.1 coiled-coil domain-containing protein 27 isoform X1 [Homo sapiens]
 >SarsCov2Spike_Specifiedy_by_Mizuno-san
 humanProteinID =  87172 , srsCov2ProteinID =  0
TQDLF
QDLFL
SVASQ
VASQS
common SCSs =  4
>XP_016855892.1 coiled-coil domain-containing protein 27 isoform X2 [Homo sapiens]
 >SarsCov2Spike_Specifiedy_by_Mizuno-san
 humanProteinID =  87173 , srsCov2ProteinID =  0
TQDLF
QDLFL
SVASQ
VASQS
common SCSs =  4
>XP_016855893.1 coiled-coil domain-containing protein 27 isoform X3 [Homo sapiens]
 >SarsCov2Spike_Specifiedy_by_Mizuno-san
 humanProteinID =  87174 , srsCov2ProteinID =  0
TQDLF
QDLFL
SVASQ
VASQS
common SCSs =  4
>XP_016855894.1 coiled-coil domain-containing protein 27 isoform X5 [Homo sapiens]
 >SarsCov2Spike_Specifiedy_by_Mizuno-san
 humanProteinID =  87175 , srsCov2ProteinID =  0
TQDLF
QDLFL
SVASQ
VASQS
common SCSs =  4
>XP_016855895.1 coiled-coil domain-containing protein 27 isoform X6 [Homo sapiens]
 >SarsCov2Spike_Specifiedy_by_Mizuno-san
 humanProteinID =  87176 , srsCov2ProteinID =  0
TQDLF
QDLFL
SVASQ
VASQS
common SCSs =  4
>XP_016855939.1 coiled-coil domain-containing protein 17 isoform X2 [Homo sapiens]
 >SarsCov2Spike_Specifiedy_by_Mizuno-san
 humanProteinID =  87191 , srsCov2ProteinID =  0
VFRSS
SALLA
AAEIR
AEIRA
common SCSs =  4
>XP_016855940.1 coiled-coil domain-containing protein 17 isoform X4 [Homo sapiens]
 >SarsCov2Spike_Specifiedy_by_Mizuno-san
 humanProteinID =  87192 , srsCov2ProteinID =  0
VFRSS
SALLA
AAEIR
AEIRA
common SCSs =  4
>XP_016855941.1 coiled-coil domain-containing protein 17 isoform X5 [Homo sapiens]
 >SarsCov2Spike_Specifiedy_by_Mizuno-san
 humanProteinID =  87193 , srsCov2ProteinID =  0
VFRSS
SALLA
AAEIR
AEIRA
common SCSs =  4
>XP_016855942.1 coiled-coil domain-containing protein 17 isoform X6 [Homo sapiens]
 >SarsCov2Spike_Specifiedy_by_Mizuno-san
 humanProteinID =  87194 , srsCov2ProteinID =  0
VFRSS
SALLA
AAEIR
AEIRA
common SCSs =  4
>XP_016855943.1 coiled-coil domain-containing protein 17 isoform X7 [Homo sapiens]
 >SarsCov2Spike_Specifiedy_by_Mizuno-san
 humanProteinID =  87195 , srsCov2ProteinID =  0
VFRSS
SALLA
AAEIR
AEIRA
common SCSs =  4
>XP_016855946.1 coiled-coil domain-containing protein 17 isoform X10 [Homo sapiens]
 >SarsCov2Spike_Specifiedy_by_Mizuno-san
 humanProteinID =  87198 , srsCov2ProteinID =  0
VFRSS
SALLA
AAEIR
AEIRA
common SCSs =  4
>XP_016855947.1 coiled-coil domain-containing protein 17 isoform X10 [Homo sapiens]
 >SarsCov2Spike_Specifiedy_by_Mizuno-san
 humanProteinID =  87199 , srsCov2ProteinID =  0
VFRSS
SALLA
AAEIR
AEIRA
common SCSs =  4
>XP_016856834.1 protein phosphatase 1 regulatory subunit 12B isoform X3 [Homo sapiens]
 >SarsCov2Spike_Specifiedy_by_Mizuno-san
 humanProteinID =  87847 , srsCov2ProteinID =  0
RSSVL
RSYLT
SYLTP
ENQKL
common SCSs =  4
>XP_016856837.1 protein phosphatase 1 regulatory subunit 12B isoform X6 [Homo sapiens]
 >SarsCov2Spike_Specifiedy_by_Mizuno-san
 humanProteinID =  87850 , srsCov2ProteinID =  0
RSSVL
RSYLT
SYLTP
ENQKL
common SCSs =  4
>XP_016856839.1 protein phosphatase 1 regulatory subunit 12B isoform X7 [Homo sapiens]
 >SarsCov2Spike_Specifiedy_by_Mizuno-san
 humanProteinID =  87851 , srsCov2ProteinID =  0
RSSVL
RSYLT
SYLTP
ENQKL
common SCSs =  4
>XP_016856900.1 enoyl-[acyl-carrier-protein] reductase, mitochondrial isoform X4 [Homo sapiens]
 >SarsCov2Spike_Specifiedy_by_Mizuno-san
 humanProteinID =  87899 , srsCov2ProteinID =  0
QSLLI
HAPAT
GAEHV
SLGAE
common SCSs =  4
>XP_016856901.1 enoyl-[acyl-carrier-protein] reductase, mitochondrial isoform X4 [Homo sapiens]
 >SarsCov2Spike_Specifiedy_by_Mizuno-san
 humanProteinID =  87900 , srsCov2ProteinID =  0
QSLLI
HAPAT
GAEHV
SLGAE
common SCSs =  4
>XP_016857880.1 pecanex-like protein 2 isoform X1 [Homo sapiens]
 >SarsCov2Spike_Specifiedy_by_Mizuno-san
 humanProteinID =  88563 , srsCov2ProteinID =  0
TTLDS
TLLAL
QDSLS
DSLSS
common SCSs =  4
>XP_016859010.1 dynein heavy chain 6, axonemal isoform X4 [Homo sapiens]
 >SarsCov2Spike_Specifiedy_by_Mizuno-san
 humanProteinID =  89281 , srsCov2ProteinID =  0
NPVLP
SALEP
DFGGF
PSKRS
common SCSs =  4
>XP_016859011.1 dynein heavy chain 6, axonemal isoform X7 [Homo sapiens]
 >SarsCov2Spike_Specifiedy_by_Mizuno-san
 humanProteinID =  89282 , srsCov2ProteinID =  0
NPVLP
SALEP
DFGGF
PSKRS
common SCSs =  4
>XP_016859012.1 dynein heavy chain 6, axonemal isoform X7 [Homo sapiens]
 >SarsCov2Spike_Specifiedy_by_Mizuno-san
 humanProteinID =  89283 , srsCov2ProteinID =  0
NPVLP
SALEP
DFGGF
PSKRS
common SCSs =  4
>XP_016859066.1 receptor tyrosine-protein kinase erbB-4 isoform X1 [Homo sapiens]
 >SarsCov2Spike_Specifiedy_by_Mizuno-san
 humanProteinID =  89323 , srsCov2ProteinID =  0
PPAYT
TVLPP
LQSLQ
LQELG
common SCSs =  4
>XP_016859067.1 receptor tyrosine-protein kinase erbB-4 isoform X2 [Homo sapiens]
 >SarsCov2Spike_Specifiedy_by_Mizuno-san
 humanProteinID =  89324 , srsCov2ProteinID =  0
PPAYT
TVLPP
LQSLQ
LQELG
common SCSs =  4
>XP_016859069.1 receptor tyrosine-protein kinase erbB-4 isoform X4 [Homo sapiens]
 >SarsCov2Spike_Specifiedy_by_Mizuno-san
 humanProteinID =  89326 , srsCov2ProteinID =  0
PPAYT
TVLPP
LQSLQ
LQELG
common SCSs =  4
>XP_016859666.1 nebulin isoform X6 [Homo sapiens]
 >SarsCov2Spike_Specifiedy_by_Mizuno-san
 humanProteinID =  89760 , srsCov2ProteinID =  0
ISSVL
RAAEI
SGINA
GINAS
common SCSs =  4
>XP_016859667.1 nebulin isoform X8 [Homo sapiens]
 >SarsCov2Spike_Specifiedy_by_Mizuno-san
 humanProteinID =  89761 , srsCov2ProteinID =  0
ISSVL
RAAEI
SGINA
GINAS
common SCSs =  4
>XP_016859668.1 nebulin isoform X16 [Homo sapiens]
 >SarsCov2Spike_Specifiedy_by_Mizuno-san
 humanProteinID =  89762 , srsCov2ProteinID =  0
ISSVL
RAAEI
SGINA
GINAS
common SCSs =  4
>XP_016859669.1 nebulin isoform X19 [Homo sapiens]
 >SarsCov2Spike_Specifiedy_by_Mizuno-san
 humanProteinID =  89763 , srsCov2ProteinID =  0
ISSVL
RAAEI
SGINA
GINAS
common SCSs =  4
>XP_016859670.1 nebulin isoform X21 [Homo sapiens]
 >SarsCov2Spike_Specifiedy_by_Mizuno-san
 humanProteinID =  89764 , srsCov2ProteinID =  0
ISSVL
RAAEI
SGINA
GINAS
common SCSs =  4
>XP_016859671.1 nebulin isoform X23 [Homo sapiens]
 >SarsCov2Spike_Specifiedy_by_Mizuno-san
 humanProteinID =  89765 , srsCov2ProteinID =  0
ISSVL
RAAEI
SGINA
GINAS
common SCSs =  4
>XP_016859672.1 nebulin isoform X28 [Homo sapiens]
 >SarsCov2Spike_Specifiedy_by_Mizuno-san
 humanProteinID =  89766 , srsCov2ProteinID =  0
ISSVL
RAAEI
SGINA
GINAS
common SCSs =  4
>XP_016859673.1 nebulin isoform X30 [Homo sapiens]
 >SarsCov2Spike_Specifiedy_by_Mizuno-san
 humanProteinID =  89767 , srsCov2ProteinID =  0
ISSVL
RAAEI
SGINA
GINAS
common SCSs =  4
>XP_016859674.1 nebulin isoform X32 [Homo sapiens]
 >SarsCov2Spike_Specifiedy_by_Mizuno-san
 humanProteinID =  89768 , srsCov2ProteinID =  0
ISSVL
RAAEI
SGINA
GINAS
common SCSs =  4
>XP_016859930.1 dedicator of cytokinesis protein 10 isoform X1 [Homo sapiens]
 >SarsCov2Spike_Specifiedy_by_Mizuno-san
 humanProteinID =  89937 , srsCov2ProteinID =  0
HRSYL
NTSNQ
VNNTV
KYEQY
common SCSs =  4
>XP_016859931.1 dedicator of cytokinesis protein 10 isoform X2 [Homo sapiens]
 >SarsCov2Spike_Specifiedy_by_Mizuno-san
 humanProteinID =  89938 , srsCov2ProteinID =  0
HRSYL
NTSNQ
VNNTV
KYEQY
common SCSs =  4
>XP_016859932.1 dedicator of cytokinesis protein 10 isoform X3 [Homo sapiens]
 >SarsCov2Spike_Specifiedy_by_Mizuno-san
 humanProteinID =  89939 , srsCov2ProteinID =  0
HRSYL
NTSNQ
VNNTV
KYEQY
common SCSs =  4
>XP_016859933.1 dedicator of cytokinesis protein 10 isoform X4 [Homo sapiens]
 >SarsCov2Spike_Specifiedy_by_Mizuno-san
 humanProteinID =  89940 , srsCov2ProteinID =  0
HRSYL
NTSNQ
VNNTV
KYEQY
common SCSs =  4
>XP_016859934.1 dedicator of cytokinesis protein 10 isoform X5 [Homo sapiens]
 >SarsCov2Spike_Specifiedy_by_Mizuno-san
 humanProteinID =  89941 , srsCov2ProteinID =  0
HRSYL
NTSNQ
VNNTV
KYEQY
common SCSs =  4
>XP_016859935.1 dedicator of cytokinesis protein 10 isoform X8 [Homo sapiens]
 >SarsCov2Spike_Specifiedy_by_Mizuno-san
 humanProteinID =  89942 , srsCov2ProteinID =  0
HRSYL
NTSNQ
VNNTV
KYEQY
common SCSs =  4
>XP_016859936.1 dedicator of cytokinesis protein 10 isoform X9 [Homo sapiens]
 >SarsCov2Spike_Specifiedy_by_Mizuno-san
 humanProteinID =  89943 , srsCov2ProteinID =  0
HRSYL
NTSNQ
VNNTV
KYEQY
common SCSs =  4
>XP_016859965.1 girdin isoform X2 [Homo sapiens]
 >SarsCov2Spike_Specifiedy_by_Mizuno-san
 humanProteinID =  89962 , srsCov2ProteinID =  0
SQPFL
NSNNL
NQNAQ
LDSFK
common SCSs =  4
>XP_016859966.1 girdin isoform X3 [Homo sapiens]
 >SarsCov2Spike_Specifiedy_by_Mizuno-san
 humanProteinID =  89963 , srsCov2ProteinID =  0
SQPFL
NSNNL
NQNAQ
LDSFK
common SCSs =  4
>XP_016859967.1 girdin isoform X4 [Homo sapiens]
 >SarsCov2Spike_Specifiedy_by_Mizuno-san
 humanProteinID =  89964 , srsCov2ProteinID =  0
SQPFL
NSNNL
NQNAQ
LDSFK
common SCSs =  4
>XP_016859968.1 girdin isoform X5 [Homo sapiens]
 >SarsCov2Spike_Specifiedy_by_Mizuno-san
 humanProteinID =  89965 , srsCov2ProteinID =  0
SQPFL
NSNNL
NQNAQ
LDSFK
common SCSs =  4
>XP_016859969.1 girdin isoform X6 [Homo sapiens]
 >SarsCov2Spike_Specifiedy_by_Mizuno-san
 humanProteinID =  89966 , srsCov2ProteinID =  0
SQPFL
NSNNL
NQNAQ
LDSFK
common SCSs =  4
>XP_016860049.1 baculoviral IAP repeat-containing protein 6 isoform X17 [Homo sapiens]
 >SarsCov2Spike_Specifiedy_by_Mizuno-san
 humanProteinID =  90024 , srsCov2ProteinID =  0
TLEIL
RRARS
GTITS
GAGAA
common SCSs =  4
>XP_016860199.1 anaphase-promoting complex subunit 1 isoform X2 [Homo sapiens]
 >SarsCov2Spike_Specifiedy_by_Mizuno-san
 humanProteinID =  90116 , srsCov2ProteinID =  0
PGQTG
IAARD
AARDL
SCLKG
common SCSs =  4
>XP_016860200.1 anaphase-promoting complex subunit 1 isoform X3 [Homo sapiens]
 >SarsCov2Spike_Specifiedy_by_Mizuno-san
 humanProteinID =  90117 , srsCov2ProteinID =  0
PGQTG
IAARD
AARDL
SCLKG
common SCSs =  4
>XP_016860204.1 anaphase-promoting complex subunit 1 isoform X8 [Homo sapiens]
 >SarsCov2Spike_Specifiedy_by_Mizuno-san
 humanProteinID =  90121 , srsCov2ProteinID =  0
PGQTG
IAARD
AARDL
SCLKG
common SCSs =  4
>XP_016860642.1 protein TANC1 isoform X15 [Homo sapiens]
 >SarsCov2Spike_Specifiedy_by_Mizuno-san
 humanProteinID =  90430 , srsCov2ProteinID =  0
TRAGC
KRSFI
RSFIE
FPREG
common SCSs =  4
>XP_016860645.1 protein TANC1 isoform X20 [Homo sapiens]
 >SarsCov2Spike_Specifiedy_by_Mizuno-san
 humanProteinID =  90432 , srsCov2ProteinID =  0
TRAGC
KRSFI
RSFIE
FPREG
common SCSs =  4
>XP_016861349.1 dynein heavy chain 12, axonemal isoform X5 [Homo sapiens]
 >SarsCov2Spike_Specifiedy_by_Mizuno-san
 humanProteinID =  90853 , srsCov2ProteinID =  0
PLVSS
FLMDL
LSETK
KNLNE
common SCSs =  4
>XP_016861350.1 dynein heavy chain 12, axonemal isoform X6 [Homo sapiens]
 >SarsCov2Spike_Specifiedy_by_Mizuno-san
 humanProteinID =  90854 , srsCov2ProteinID =  0
PLVSS
FLMDL
LSETK
KNLNE
common SCSs =  4
>XP_016861573.1 palmitoyltransferase ZDHHC23 isoform X2 [Homo sapiens]
 >SarsCov2Spike_Specifiedy_by_Mizuno-san
 humanProteinID =  90998 , srsCov2ProteinID =  0
LVLLP
LLALH
LALHR
VFLHV
common SCSs =  4
>XP_016861575.1 palmitoyltransferase ZDHHC23 isoform X6 [Homo sapiens]
 >SarsCov2Spike_Specifiedy_by_Mizuno-san
 humanProteinID =  90999 , srsCov2ProteinID =  0
LVLLP
LLALH
LALHR
VFLHV
common SCSs =  4
>XP_016861576.1 palmitoyltransferase ZDHHC23 isoform X7 [Homo sapiens]
 >SarsCov2Spike_Specifiedy_by_Mizuno-san
 humanProteinID =  91000 , srsCov2ProteinID =  0
LVLLP
LLALH
LALHR
VFLHV
common SCSs =  4
>XP_016861880.1 microtubule-associated protein 4 isoform X4 [Homo sapiens]
 >SarsCov2Spike_Specifiedy_by_Mizuno-san
 humanProteinID =  91246 , srsCov2ProteinID =  0
PLSET
SPTKL
KPSKR
PSKRS
common SCSs =  4
>XP_016861881.1 microtubule-associated protein 4 isoform X10 [Homo sapiens]
 >SarsCov2Spike_Specifiedy_by_Mizuno-san
 humanProteinID =  91247 , srsCov2ProteinID =  0
PLSET
SPTKL
KPSKR
PSKRS
common SCSs =  4
>XP_016862256.1 histone-lysine N-methyltransferase SETD5 isoform X1 [Homo sapiens]
 >SarsCov2Spike_Specifiedy_by_Mizuno-san
 humanProteinID =  91457 , srsCov2ProteinID =  0
STGSN
GDIAA
AARDL
SLSST
common SCSs =  4
>XP_016862259.1 histone-lysine N-methyltransferase SETD5 isoform X4 [Homo sapiens]
 >SarsCov2Spike_Specifiedy_by_Mizuno-san
 humanProteinID =  91459 , srsCov2ProteinID =  0
STGSN
GDIAA
AARDL
SLSST
common SCSs =  4
>XP_016862261.1 histone-lysine N-methyltransferase SETD5 isoform X8 [Homo sapiens]
 >SarsCov2Spike_Specifiedy_by_Mizuno-san
 humanProteinID =  91461 , srsCov2ProteinID =  0
STGSN
GDIAA
AARDL
SLSST
common SCSs =  4
>XP_016862262.1 histone-lysine N-methyltransferase SETD5 isoform X9 [Homo sapiens]
 >SarsCov2Spike_Specifiedy_by_Mizuno-san
 humanProteinID =  91462 , srsCov2ProteinID =  0
STGSN
GDIAA
AARDL
SLSST
common SCSs =  4
>XP_016862264.1 histone-lysine N-methyltransferase SETD5 isoform X13 [Homo sapiens]
 >SarsCov2Spike_Specifiedy_by_Mizuno-san
 humanProteinID =  91464 , srsCov2ProteinID =  0
STGSN
GDIAA
AARDL
SLSST
common SCSs =  4
>XP_016862265.1 histone-lysine N-methyltransferase SETD5 isoform X16 [Homo sapiens]
 >SarsCov2Spike_Specifiedy_by_Mizuno-san
 humanProteinID =  91465 , srsCov2ProteinID =  0
STGSN
GDIAA
AARDL
SLSST
common SCSs =  4
>XP_016862266.1 histone-lysine N-methyltransferase SETD5 isoform X16 [Homo sapiens]
 >SarsCov2Spike_Specifiedy_by_Mizuno-san
 humanProteinID =  91466 , srsCov2ProteinID =  0
STGSN
GDIAA
AARDL
SLSST
common SCSs =  4
>XP_016862267.1 histone-lysine N-methyltransferase SETD5 isoform X16 [Homo sapiens]
 >SarsCov2Spike_Specifiedy_by_Mizuno-san
 humanProteinID =  91467 , srsCov2ProteinID =  0
STGSN
GDIAA
AARDL
SLSST
common SCSs =  4
>XP_016862268.1 histone-lysine N-methyltransferase SETD5 isoform X17 [Homo sapiens]
 >SarsCov2Spike_Specifiedy_by_Mizuno-san
 humanProteinID =  91468 , srsCov2ProteinID =  0
STGSN
GDIAA
AARDL
SLSST
common SCSs =  4
>XP_016862269.1 histone-lysine N-methyltransferase SETD5 isoform X17 [Homo sapiens]
 >SarsCov2Spike_Specifiedy_by_Mizuno-san
 humanProteinID =  91469 , srsCov2ProteinID =  0
STGSN
GDIAA
AARDL
SLSST
common SCSs =  4
>XP_016862272.1 histone-lysine N-methyltransferase SETD5 isoform X19 [Homo sapiens]
 >SarsCov2Spike_Specifiedy_by_Mizuno-san
 humanProteinID =  91471 , srsCov2ProteinID =  0
STGSN
GDIAA
AARDL
SLSST
common SCSs =  4
>XP_016863827.1 la-related protein 1B isoform X1 [Homo sapiens]
 >SarsCov2Spike_Specifiedy_by_Mizuno-san
 humanProteinID =  92504 , srsCov2ProteinID =  0
SKTQS
EVPVA
NSPRR
LPPLL
common SCSs =  4
>XP_016863828.1 la-related protein 1B isoform X5 [Homo sapiens]
 >SarsCov2Spike_Specifiedy_by_Mizuno-san
 humanProteinID =  92505 , srsCov2ProteinID =  0
SKTQS
EVPVA
NSPRR
LPPLL
common SCSs =  4
>XP_016864632.1 dmX-like protein 1 isoform X3 [Homo sapiens]
 >SarsCov2Spike_Specifiedy_by_Mizuno-san
 humanProteinID =  93091 , srsCov2ProteinID =  0
GEVFN
GLTVL
LAGTI
LNESL
common SCSs =  4
>XP_016864633.1 dmX-like protein 1 isoform X3 [Homo sapiens]
 >SarsCov2Spike_Specifiedy_by_Mizuno-san
 humanProteinID =  93092 , srsCov2ProteinID =  0
GEVFN
GLTVL
LAGTI
LNESL
common SCSs =  4
>XP_016864634.1 dmX-like protein 1 isoform X3 [Homo sapiens]
 >SarsCov2Spike_Specifiedy_by_Mizuno-san
 humanProteinID =  93093 , srsCov2ProteinID =  0
GEVFN
GLTVL
LAGTI
LNESL
common SCSs =  4
>XP_016864635.1 dmX-like protein 1 isoform X4 [Homo sapiens]
 >SarsCov2Spike_Specifiedy_by_Mizuno-san
 humanProteinID =  93094 , srsCov2ProteinID =  0
GEVFN
GLTVL
LAGTI
LNESL
common SCSs =  4
>XP_016864636.1 dmX-like protein 1 isoform X5 [Homo sapiens]
 >SarsCov2Spike_Specifiedy_by_Mizuno-san
 humanProteinID =  93095 , srsCov2ProteinID =  0
GEVFN
GLTVL
LAGTI
LNESL
common SCSs =  4
>XP_016864637.1 dmX-like protein 1 isoform X6 [Homo sapiens]
 >SarsCov2Spike_Specifiedy_by_Mizuno-san
 humanProteinID =  93096 , srsCov2ProteinID =  0
GEVFN
GLTVL
LAGTI
LNESL
common SCSs =  4
>XP_016864734.1 PDZ domain-containing protein 2 isoform X6 [Homo sapiens]
 >SarsCov2Spike_Specifiedy_by_Mizuno-san
 humanProteinID =  93182 , srsCov2ProteinID =  0
SPRRA
KTSVD
GDSTE
PDPSK
common SCSs =  4
>XP_016864735.1 PDZ domain-containing protein 2 isoform X7 [Homo sapiens]
 >SarsCov2Spike_Specifiedy_by_Mizuno-san
 humanProteinID =  93183 , srsCov2ProteinID =  0
SPRRA
KTSVD
GDSTE
PDPSK
common SCSs =  4
>XP_016864774.1 little elongation complex subunit 1 isoform X2 [Homo sapiens]
 >SarsCov2Spike_Specifiedy_by_Mizuno-san
 humanProteinID =  93212 , srsCov2ProteinID =  0
VSVIT
LPPLL
QALNT
PAQEK
common SCSs =  4
>XP_016864881.1 glutamate receptor 1 isoform X1 [Homo sapiens]
 >SarsCov2Spike_Specifiedy_by_Mizuno-san
 humanProteinID =  93300 , srsCov2ProteinID =  0
NLDSK
KVGGN
YTSAL
ANLAA
common SCSs =  4
>XP_016865249.1 ciliogenesis and planar polarity effector 1 isoform X9 [Homo sapiens]
 >SarsCov2Spike_Specifiedy_by_Mizuno-san
 humanProteinID =  93517 , srsCov2ProteinID =  0
NLCPF
VLPPL
ENQKL
CVLGQ
common SCSs =  4
>XP_016865250.1 ciliogenesis and planar polarity effector 1 isoform X9 [Homo sapiens]
 >SarsCov2Spike_Specifiedy_by_Mizuno-san
 humanProteinID =  93518 , srsCov2ProteinID =  0
NLCPF
VLPPL
ENQKL
CVLGQ
common SCSs =  4
>XP_016865252.1 ciliogenesis and planar polarity effector 1 isoform X13 [Homo sapiens]
 >SarsCov2Spike_Specifiedy_by_Mizuno-san
 humanProteinID =  93519 , srsCov2ProteinID =  0
NLCPF
VLPPL
ENQKL
CVLGQ
common SCSs =  4
>XP_016865254.1 ciliogenesis and planar polarity effector 1 isoform X14 [Homo sapiens]
 >SarsCov2Spike_Specifiedy_by_Mizuno-san
 humanProteinID =  93520 , srsCov2ProteinID =  0
NLCPF
VLPPL
ENQKL
CVLGQ
common SCSs =  4
>XP_016865256.1 sodium-dependent proline transporter isoform X1 [Homo sapiens]
 >SarsCov2Spike_Specifiedy_by_Mizuno-san
 humanProteinID =  93522 , srsCov2ProteinID =  0
TLLAL
GAGAA
AALQI
LKGVK
common SCSs =  4
>XP_016865257.1 sodium-dependent proline transporter isoform X2 [Homo sapiens]
 >SarsCov2Spike_Specifiedy_by_Mizuno-san
 humanProteinID =  93523 , srsCov2ProteinID =  0
TLLAL
GAGAA
AALQI
LKGVK
common SCSs =  4
>XP_016865258.1 sodium-dependent proline transporter isoform X2 [Homo sapiens]
 >SarsCov2Spike_Specifiedy_by_Mizuno-san
 humanProteinID =  93524 , srsCov2ProteinID =  0
TLLAL
GAGAA
AALQI
LKGVK
common SCSs =  4
>XP_016865259.1 sodium-dependent proline transporter isoform X3 [Homo sapiens]
 >SarsCov2Spike_Specifiedy_by_Mizuno-san
 humanProteinID =  93525 , srsCov2ProteinID =  0
TLLAL
GAGAA
AALQI
LKGVK
common SCSs =  4
>XP_016865268.1 slit homolog 3 protein isoform X1 [Homo sapiens]
 >SarsCov2Spike_Specifiedy_by_Mizuno-san
 humanProteinID =  93532 , srsCov2ProteinID =  0
PQGFS
SNNSI
DSLSS
LGKLQ
common SCSs =  4
>XP_016865972.1 centrosomal protein of 162 kDa isoform X1 [Homo sapiens]
 >SarsCov2Spike_Specifiedy_by_Mizuno-san
 humanProteinID =  94046 , srsCov2ProteinID =  0
TLDSK
DLEGK
TGTGV
IQKEI
common SCSs =  4
>XP_016865973.1 centrosomal protein of 162 kDa isoform X2 [Homo sapiens]
 >SarsCov2Spike_Specifiedy_by_Mizuno-san
 humanProteinID =  94047 , srsCov2ProteinID =  0
TLDSK
DLEGK
TGTGV
IQKEI
common SCSs =  4
>XP_016866340.1 laminin subunit alpha-2 isoform X4 [Homo sapiens]
 >SarsCov2Spike_Specifiedy_by_Mizuno-san
 humanProteinID =  94296 , srsCov2ProteinID =  0
FGGVS
GKIQD
LNTLV
QKEID
common SCSs =  4
>XP_016866342.1 laminin subunit alpha-2 isoform X6 [Homo sapiens]
 >SarsCov2Spike_Specifiedy_by_Mizuno-san
 humanProteinID =  94298 , srsCov2ProteinID =  0
FGGVS
GKIQD
LNTLV
QKEID
common SCSs =  4
>XP_016866343.1 laminin subunit alpha-4 isoform X2 [Homo sapiens]
 >SarsCov2Spike_Specifiedy_by_Mizuno-san
 humanProteinID =  94299 , srsCov2ProteinID =  0
RSVAS
GGFNF
SLSST
LSSTA
common SCSs =  4
>XP_016866437.1 fibrocystin isoform X7 [Homo sapiens]
 >SarsCov2Spike_Specifiedy_by_Mizuno-san
 humanProteinID =  94369 , srsCov2ProteinID =  0
QDLFL
VIRGD
GSTPC
KLQDV
common SCSs =  4
>XP_016866440.1 fibrocystin isoform X14 [Homo sapiens]
 >SarsCov2Spike_Specifiedy_by_Mizuno-san
 humanProteinID =  94372 , srsCov2ProteinID =  0
QDLFL
VIRGD
GSTPC
ITGRL
common SCSs =  4
>XP_016866441.1 fibrocystin isoform X15 [Homo sapiens]
 >SarsCov2Spike_Specifiedy_by_Mizuno-san
 humanProteinID =  94373 , srsCov2ProteinID =  0
QDLFL
VIRGD
GSTPC
ITGRL
common SCSs =  4
>XP_016866478.1 PH-interacting protein isoform X3 [Homo sapiens]
 >SarsCov2Spike_Specifiedy_by_Mizuno-san
 humanProteinID =  94402 , srsCov2ProteinID =  0
PSKRS
ALNTL
ISSVL
EDDSE
common SCSs =  4
>XP_016866479.1 PH-interacting protein isoform X3 [Homo sapiens]
 >SarsCov2Spike_Specifiedy_by_Mizuno-san
 humanProteinID =  94403 , srsCov2ProteinID =  0
PSKRS
ALNTL
ISSVL
EDDSE
common SCSs =  4
>XP_016866575.1 NHS-like protein 1 isoform X1 [Homo sapiens]
 >SarsCov2Spike_Specifiedy_by_Mizuno-san
 humanProteinID =  94484 , srsCov2ProteinID =  0
IAIPT
NIQKE
LNESL
NESLI
common SCSs =  4
>XP_016866576.1 NHS-like protein 1 isoform X3 [Homo sapiens]
 >SarsCov2Spike_Specifiedy_by_Mizuno-san
 humanProteinID =  94485 , srsCov2ProteinID =  0
IAIPT
NIQKE
LNESL
NESLI
common SCSs =  4
>XP_016866577.1 NHS-like protein 1 isoform X7 [Homo sapiens]
 >SarsCov2Spike_Specifiedy_by_Mizuno-san
 humanProteinID =  94486 , srsCov2ProteinID =  0
IAIPT
NIQKE
LNESL
NESLI
common SCSs =  4
>XP_016866578.1 NHS-like protein 1 isoform X12 [Homo sapiens]
 >SarsCov2Spike_Specifiedy_by_Mizuno-san
 humanProteinID =  94487 , srsCov2ProteinID =  0
IAIPT
NIQKE
LNESL
NESLI
common SCSs =  4
>XP_016866644.1 DNA polymerase zeta catalytic subunit isoform X7 [Homo sapiens]
 >SarsCov2Spike_Specifiedy_by_Mizuno-san
 humanProteinID =  94511 , srsCov2ProteinID =  0
DSSSG
EILPV
ILPVS
SLSST
common SCSs =  4
>XP_016866694.1 dystonin isoform X1 [Homo sapiens]
 >SarsCov2Spike_Specifiedy_by_Mizuno-san
 humanProteinID =  94544 , srsCov2ProteinID =  0
FLVLL
TEKSN
LDKVE
AGLIA
common SCSs =  4
>XP_016866695.1 dystonin isoform X2 [Homo sapiens]
 >SarsCov2Spike_Specifiedy_by_Mizuno-san
 humanProteinID =  94545 , srsCov2ProteinID =  0
FLVLL
TEKSN
LDKVE
AGLIA
common SCSs =  4
>XP_016866696.1 dystonin isoform X4 [Homo sapiens]
 >SarsCov2Spike_Specifiedy_by_Mizuno-san
 humanProteinID =  94546 , srsCov2ProteinID =  0
FLVLL
TEKSN
LDKVE
AGLIA
common SCSs =  4
>XP_016866698.1 dystonin isoform X6 [Homo sapiens]
 >SarsCov2Spike_Specifiedy_by_Mizuno-san
 humanProteinID =  94547 , srsCov2ProteinID =  0
FLVLL
TEKSN
LDKVE
AGLIA
common SCSs =  4
>XP_016866699.1 dystonin isoform X8 [Homo sapiens]
 >SarsCov2Spike_Specifiedy_by_Mizuno-san
 humanProteinID =  94548 , srsCov2ProteinID =  0
FLVLL
TEKSN
LDKVE
AGLIA
common SCSs =  4
>XP_016866700.1 dystonin isoform X10 [Homo sapiens]
 >SarsCov2Spike_Specifiedy_by_Mizuno-san
 humanProteinID =  94549 , srsCov2ProteinID =  0
FLVLL
TEKSN
LDKVE
AGLIA
common SCSs =  4
>XP_016866701.1 dystonin isoform X11 [Homo sapiens]
 >SarsCov2Spike_Specifiedy_by_Mizuno-san
 humanProteinID =  94550 , srsCov2ProteinID =  0
FLVLL
TEKSN
LDKVE
AGLIA
common SCSs =  4
>XP_016866702.1 dystonin isoform X13 [Homo sapiens]
 >SarsCov2Spike_Specifiedy_by_Mizuno-san
 humanProteinID =  94551 , srsCov2ProteinID =  0
FLVLL
TEKSN
LDKVE
AGLIA
common SCSs =  4
>XP_016866703.1 dystonin isoform X14 [Homo sapiens]
 >SarsCov2Spike_Specifiedy_by_Mizuno-san
 humanProteinID =  94552 , srsCov2ProteinID =  0
FLVLL
TEKSN
LDKVE
AGLIA
common SCSs =  4
>XP_016866704.1 dystonin isoform X15 [Homo sapiens]
 >SarsCov2Spike_Specifiedy_by_Mizuno-san
 humanProteinID =  94553 , srsCov2ProteinID =  0
FLVLL
TEKSN
LDKVE
AGLIA
common SCSs =  4
>XP_016866705.1 dystonin isoform X17 [Homo sapiens]
 >SarsCov2Spike_Specifiedy_by_Mizuno-san
 humanProteinID =  94554 , srsCov2ProteinID =  0
FLVLL
TEKSN
LDKVE
AGLIA
common SCSs =  4
>XP_016867256.1 ATP-binding cassette sub-family A member 13 isoform X10 [Homo sapiens]
 >SarsCov2Spike_Specifiedy_by_Mizuno-san
 humanProteinID =  94954 , srsCov2ProteinID =  0
YLQPR
LEILD
FNFSQ
SALLA
common SCSs =  4
>XP_016867257.1 ATP-binding cassette sub-family A member 13 isoform X11 [Homo sapiens]
 >SarsCov2Spike_Specifiedy_by_Mizuno-san
 humanProteinID =  94955 , srsCov2ProteinID =  0
YLQPR
LEILD
FNFSQ
SALLA
common SCSs =  4
>XP_016867843.1 anillin isoform X2 [Homo sapiens]
 >SarsCov2Spike_Specifiedy_by_Mizuno-san
 humanProteinID =  95342 , srsCov2ProteinID =  0
SKTQS
KTQSL
ANLAA
NLAAT
common SCSs =  4
>XP_016867844.1 anillin isoform X3 [Homo sapiens]
 >SarsCov2Spike_Specifiedy_by_Mizuno-san
 humanProteinID =  95343 , srsCov2ProteinID =  0
SKTQS
KTQSL
ANLAA
NLAAT
common SCSs =  4
>XP_016867845.1 anillin isoform X5 [Homo sapiens]
 >SarsCov2Spike_Specifiedy_by_Mizuno-san
 humanProteinID =  95344 , srsCov2ProteinID =  0
SKTQS
KTQSL
ANLAA
NLAAT
common SCSs =  4
>XP_016868261.1 maltase-glucoamylase, intestinal isoform X1 [Homo sapiens]
 >SarsCov2Spike_Specifiedy_by_Mizuno-san
 humanProteinID =  95610 , srsCov2ProteinID =  0
FTRGV
YQTSN
QILPD
KRSFI
common SCSs =  4
>XP_016869458.1 fibrocystin-L isoform X1 [Homo sapiens]
 >SarsCov2Spike_Specifiedy_by_Mizuno-san
 humanProteinID =  96360 , srsCov2ProteinID =  0
GINIT
NLVKN
ISVTT
ANQFN
common SCSs =  4
>XP_016869459.1 fibrocystin-L isoform X3 [Homo sapiens]
 >SarsCov2Spike_Specifiedy_by_Mizuno-san
 humanProteinID =  96361 , srsCov2ProteinID =  0
GINIT
NLVKN
ISVTT
ANQFN
common SCSs =  4
>XP_016869460.1 fibrocystin-L isoform X4 [Homo sapiens]
 >SarsCov2Spike_Specifiedy_by_Mizuno-san
 humanProteinID =  96362 , srsCov2ProteinID =  0
GINIT
NLVKN
ISVTT
ANQFN
common SCSs =  4
>XP_016869461.1 fibrocystin-L isoform X5 [Homo sapiens]
 >SarsCov2Spike_Specifiedy_by_Mizuno-san
 humanProteinID =  96363 , srsCov2ProteinID =  0
GINIT
NLVKN
ISVTT
ANQFN
common SCSs =  4
>XP_016869592.1 RB1-inducible coiled-coil protein 1 isoform X1 [Homo sapiens]
 >SarsCov2Spike_Specifiedy_by_Mizuno-san
 humanProteinID =  96420 , srsCov2ProteinID =  0
LVSSQ
GDSSS
LFRKS
SFCTQ
common SCSs =  4
>XP_016869593.1 RB1-inducible coiled-coil protein 1 isoform X1 [Homo sapiens]
 >SarsCov2Spike_Specifiedy_by_Mizuno-san
 humanProteinID =  96421 , srsCov2ProteinID =  0
LVSSQ
GDSSS
LFRKS
SFCTQ
common SCSs =  4
>XP_016869594.1 RB1-inducible coiled-coil protein 1 isoform X2 [Homo sapiens]
 >SarsCov2Spike_Specifiedy_by_Mizuno-san
 humanProteinID =  96422 , srsCov2ProteinID =  0
LVSSQ
GDSSS
LFRKS
SFCTQ
common SCSs =  4
>XP_016869595.1 RB1-inducible coiled-coil protein 1 isoform X4 [Homo sapiens]
 >SarsCov2Spike_Specifiedy_by_Mizuno-san
 humanProteinID =  96423 , srsCov2ProteinID =  0
LVSSQ
GDSSS
LFRKS
SFCTQ
common SCSs =  4
>XP_016869596.1 RB1-inducible coiled-coil protein 1 isoform X5 [Homo sapiens]
 >SarsCov2Spike_Specifiedy_by_Mizuno-san
 humanProteinID =  96424 , srsCov2ProteinID =  0
LVSSQ
GDSSS
LFRKS
SFCTQ
common SCSs =  4
>XP_016869597.1 RB1-inducible coiled-coil protein 1 isoform X6 [Homo sapiens]
 >SarsCov2Spike_Specifiedy_by_Mizuno-san
 humanProteinID =  96425 , srsCov2ProteinID =  0
LVSSQ
GDSSS
LFRKS
SFCTQ
common SCSs =  4
>XP_016869598.1 RB1-inducible coiled-coil protein 1 isoform X9 [Homo sapiens]
 >SarsCov2Spike_Specifiedy_by_Mizuno-san
 humanProteinID =  96426 , srsCov2ProteinID =  0
LVSSQ
GDSSS
LFRKS
SFCTQ
common SCSs =  4
>XP_016870747.1 multiple PDZ domain protein isoform X8 [Homo sapiens]
 >SarsCov2Spike_Specifiedy_by_Mizuno-san
 humanProteinID =  97184 , srsCov2ProteinID =  0
TISVT
FSQIL
QDVVN
TYVPA
common SCSs =  4
>XP_016870748.1 multiple PDZ domain protein isoform X9 [Homo sapiens]
 >SarsCov2Spike_Specifiedy_by_Mizuno-san
 humanProteinID =  97185 , srsCov2ProteinID =  0
TISVT
FSQIL
QDVVN
TYVPA
common SCSs =  4
>XP_016870900.1 proline rich transmembrane protein 1B isoform X1 [Homo sapiens]
 >SarsCov2Spike_Specifiedy_by_Mizuno-san
 humanProteinID =  97269 , srsCov2ProteinID =  0
GAGAA
AGAAL
GLIAI
LIAIV
common SCSs =  4
>XP_016870993.1 sorbin and SH3 domain-containing protein 1 isoform X10 [Homo sapiens]
 >SarsCov2Spike_Specifiedy_by_Mizuno-san
 humanProteinID =  97317 , srsCov2ProteinID =  0
STQDL
FNFNG
RSVAS
DIAAR
common SCSs =  4
>XP_016870995.1 sorbin and SH3 domain-containing protein 1 isoform X12 [Homo sapiens]
 >SarsCov2Spike_Specifiedy_by_Mizuno-san
 humanProteinID =  97319 , srsCov2ProteinID =  0
STQDL
FNFNG
RSVAS
DIAAR
common SCSs =  4
>XP_016870997.1 sorbin and SH3 domain-containing protein 1 isoform X15 [Homo sapiens]
 >SarsCov2Spike_Specifiedy_by_Mizuno-san
 humanProteinID =  97321 , srsCov2ProteinID =  0
STQDL
FNFNG
RSVAS
DIAAR
common SCSs =  4
>XP_016870998.1 sorbin and SH3 domain-containing protein 1 isoform X16 [Homo sapiens]
 >SarsCov2Spike_Specifiedy_by_Mizuno-san
 humanProteinID =  97322 , srsCov2ProteinID =  0
STQDL
FNFNG
RSVAS
DIAAR
common SCSs =  4
>XP_016871000.1 sorbin and SH3 domain-containing protein 1 isoform X18 [Homo sapiens]
 >SarsCov2Spike_Specifiedy_by_Mizuno-san
 humanProteinID =  97324 , srsCov2ProteinID =  0
STQDL
FNFNG
RSVAS
DIAAR
common SCSs =  4
>XP_016871001.1 sorbin and SH3 domain-containing protein 1 isoform X19 [Homo sapiens]
 >SarsCov2Spike_Specifiedy_by_Mizuno-san
 humanProteinID =  97325 , srsCov2ProteinID =  0
STQDL
FNFNG
RSVAS
DIAAR
common SCSs =  4
>XP_016871002.1 sorbin and SH3 domain-containing protein 1 isoform X20 [Homo sapiens]
 >SarsCov2Spike_Specifiedy_by_Mizuno-san
 humanProteinID =  97326 , srsCov2ProteinID =  0
STQDL
FNFNG
RSVAS
DIAAR
common SCSs =  4
>XP_016871103.1 VPS10 domain-containing receptor SorCS1 isoform X1 [Homo sapiens]
 >SarsCov2Spike_Specifiedy_by_Mizuno-san
 humanProteinID =  97386 , srsCov2ProteinID =  0
TRGVY
PLVDL
SALLA
ALLAG
common SCSs =  4
>XP_016871104.1 VPS10 domain-containing receptor SorCS1 isoform X3 [Homo sapiens]
 >SarsCov2Spike_Specifiedy_by_Mizuno-san
 humanProteinID =  97387 , srsCov2ProteinID =  0
TRGVY
PLVDL
SALLA
ALLAG
common SCSs =  4
>XP_016871503.1 WASH complex subunit 2C isoform X3 [Homo sapiens]
 >SarsCov2Spike_Specifiedy_by_Mizuno-san
 humanProteinID =  97633 , srsCov2ProteinID =  0
SKPSK
IGKIQ
PDVDL
EPVLK
common SCSs =  4
>XP_016871506.1 WASH complex subunit 2C isoform X7 [Homo sapiens]
 >SarsCov2Spike_Specifiedy_by_Mizuno-san
 humanProteinID =  97634 , srsCov2ProteinID =  0
SKPSK
IGKIQ
PDVDL
EPVLK
common SCSs =  4
>XP_016871716.1 WASH complex subunit 2A isoform X3 [Homo sapiens]
 >SarsCov2Spike_Specifiedy_by_Mizuno-san
 humanProteinID =  97788 , srsCov2ProteinID =  0
SKPSK
IGKIQ
PDVDL
EPVLK
common SCSs =  4
>XP_016871719.1 WASH complex subunit 2A isoform X7 [Homo sapiens]
 >SarsCov2Spike_Specifiedy_by_Mizuno-san
 humanProteinID =  97791 , srsCov2ProteinID =  0
SKPSK
IGKIQ
PDVDL
EPVLK
common SCSs =  4
>XP_016871799.1 1-phosphatidylinositol 4,5-bisphosphate phosphodiesterase epsilon-1 isoform X1 [Homo sapiens]
 >SarsCov2Spike_Specifiedy_by_Mizuno-san
 humanProteinID =  97829 , srsCov2ProteinID =  0
VADYS
RQIAP
AKNLN
LIDLQ
common SCSs =  4
>XP_016871800.1 1-phosphatidylinositol 4,5-bisphosphate phosphodiesterase epsilon-1 isoform X1 [Homo sapiens]
 >SarsCov2Spike_Specifiedy_by_Mizuno-san
 humanProteinID =  97830 , srsCov2ProteinID =  0
VADYS
RQIAP
AKNLN
LIDLQ
common SCSs =  4
>XP_016872402.1 disks large homolog 5 isoform X4 [Homo sapiens]
 >SarsCov2Spike_Specifiedy_by_Mizuno-san
 humanProteinID =  98225 , srsCov2ProteinID =  0
PPLLT
PLLTD
LSSTA
LQSLQ
common SCSs =  4
>XP_016872403.1 disks large homolog 5 isoform X5 [Homo sapiens]
 >SarsCov2Spike_Specifiedy_by_Mizuno-san
 humanProteinID =  98226 , srsCov2ProteinID =  0
PPLLT
PLLTD
LSSTA
LQSLQ
common SCSs =  4
>XP_016872667.1 protocadherin Fat 3 isoform X1 [Homo sapiens]
 >SarsCov2Spike_Specifiedy_by_Mizuno-san
 humanProteinID =  98391 , srsCov2ProteinID =  0
DSSSG
SLSST
LSSTA
MVTIM
common SCSs =  4
>XP_016872668.1 protocadherin Fat 3 isoform X1 [Homo sapiens]
 >SarsCov2Spike_Specifiedy_by_Mizuno-san
 humanProteinID =  98392 , srsCov2ProteinID =  0
DSSSG
SLSST
LSSTA
MVTIM
common SCSs =  4
>XP_016872669.1 protocadherin Fat 3 isoform X2 [Homo sapiens]
 >SarsCov2Spike_Specifiedy_by_Mizuno-san
 humanProteinID =  98393 , srsCov2ProteinID =  0
DSSSG
SLSST
LSSTA
MVTIM
common SCSs =  4
>XP_016872671.1 protocadherin Fat 3 isoform X4 [Homo sapiens]
 >SarsCov2Spike_Specifiedy_by_Mizuno-san
 humanProteinID =  98394 , srsCov2ProteinID =  0
DSSSG
SLSST
LSSTA
MVTIM
common SCSs =  4
>XP_016872673.1 protocadherin Fat 3 isoform X6 [Homo sapiens]
 >SarsCov2Spike_Specifiedy_by_Mizuno-san
 humanProteinID =  98395 , srsCov2ProteinID =  0
DSSSG
SLSST
LSSTA
MVTIM
common SCSs =  4
>XP_016872674.1 protocadherin Fat 3 isoform X7 [Homo sapiens]
 >SarsCov2Spike_Specifiedy_by_Mizuno-san
 humanProteinID =  98396 , srsCov2ProteinID =  0
DSSSG
SLSST
LSSTA
MVTIM
common SCSs =  4
>XP_016872675.1 protocadherin Fat 3 isoform X8 [Homo sapiens]
 >SarsCov2Spike_Specifiedy_by_Mizuno-san
 humanProteinID =  98397 , srsCov2ProteinID =  0
DSSSG
SLSST
LSSTA
MVTIM
common SCSs =  4
>XP_016872676.1 protocadherin Fat 3 isoform X8 [Homo sapiens]
 >SarsCov2Spike_Specifiedy_by_Mizuno-san
 humanProteinID =  98398 , srsCov2ProteinID =  0
DSSSG
SLSST
LSSTA
MVTIM
common SCSs =  4
>XP_016872730.1 pleckstrin homology domain-containing family A member 7 isoform X13 [Homo sapiens]
 >SarsCov2Spike_Specifiedy_by_Mizuno-san
 humanProteinID =  98436 , srsCov2ProteinID =  0
RKSNL
SPRRA
PRRAR
LQTYV
common SCSs =  4
>XP_016872731.1 pleckstrin homology domain-containing family A member 7 isoform X14 [Homo sapiens]
 >SarsCov2Spike_Specifiedy_by_Mizuno-san
 humanProteinID =  98437 , srsCov2ProteinID =  0
RKSNL
SPRRA
PRRAR
LQTYV
common SCSs =  4
>XP_016873026.1 neuronal PAS domain-containing protein 4 isoform X1 [Homo sapiens]
 >SarsCov2Spike_Specifiedy_by_Mizuno-san
 humanProteinID =  98631 , srsCov2ProteinID =  0
TLLAL
DQLTP
IDRLI
EIDRL
common SCSs =  4
>XP_016873027.1 neuronal PAS domain-containing protein 4 isoform X2 [Homo sapiens]
 >SarsCov2Spike_Specifiedy_by_Mizuno-san
 humanProteinID =  98632 , srsCov2ProteinID =  0
TLLAL
DQLTP
IDRLI
EIDRL
common SCSs =  4
>XP_016873098.1 glutamate receptor 4 isoform X4 [Homo sapiens]
 >SarsCov2Spike_Specifiedy_by_Mizuno-san
 humanProteinID =  98684 , srsCov2ProteinID =  0
NLDSK
KVGGN
YTSAL
ANLAA
common SCSs =  4
>XP_016873099.1 glutamate receptor 4 isoform X5 [Homo sapiens]
 >SarsCov2Spike_Specifiedy_by_Mizuno-san
 humanProteinID =  98685 , srsCov2ProteinID =  0
NLDSK
KVGGN
YTSAL
ANLAA
common SCSs =  4
>XP_016873100.1 glutamate receptor 4 isoform X6 [Homo sapiens]
 >SarsCov2Spike_Specifiedy_by_Mizuno-san
 humanProteinID =  98686 , srsCov2ProteinID =  0
NLDSK
KVGGN
YTSAL
ANLAA
common SCSs =  4
>XP_016874009.1 neuron navigator 2 isoform X9 [Homo sapiens]
 >SarsCov2Spike_Specifiedy_by_Mizuno-san
 humanProteinID =  99275 , srsCov2ProteinID =  0
MDLEG
TISVT
FNFSQ
RLQSL
common SCSs =  4
>XP_016874010.1 neuron navigator 2 isoform X12 [Homo sapiens]
 >SarsCov2Spike_Specifiedy_by_Mizuno-san
 humanProteinID =  99276 , srsCov2ProteinID =  0
MDLEG
TISVT
FNFSQ
RLQSL
common SCSs =  4
>XP_016874011.1 neuron navigator 2 isoform X13 [Homo sapiens]
 >SarsCov2Spike_Specifiedy_by_Mizuno-san
 humanProteinID =  99277 , srsCov2ProteinID =  0
MDLEG
TISVT
FNFSQ
RLQSL
common SCSs =  4
>XP_016874012.1 neuron navigator 2 isoform X16 [Homo sapiens]
 >SarsCov2Spike_Specifiedy_by_Mizuno-san
 humanProteinID =  99278 , srsCov2ProteinID =  0
MDLEG
TISVT
FNFSQ
RLQSL
common SCSs =  4
>XP_016874013.1 neuron navigator 2 isoform X16 [Homo sapiens]
 >SarsCov2Spike_Specifiedy_by_Mizuno-san
 humanProteinID =  99279 , srsCov2ProteinID =  0
MDLEG
TISVT
FNFSQ
RLQSL
common SCSs =  4
>XP_016874014.1 neuron navigator 2 isoform X17 [Homo sapiens]
 >SarsCov2Spike_Specifiedy_by_Mizuno-san
 humanProteinID =  99280 , srsCov2ProteinID =  0
MDLEG
TISVT
FNFSQ
RLQSL
common SCSs =  4
>XP_016874532.1 protein MON2 homolog isoform X3 [Homo sapiens]
 >SarsCov2Spike_Specifiedy_by_Mizuno-san
 humanProteinID =  99641 , srsCov2ProteinID =  0
SQPFL
SVLND
ILSRL
LDKVE
common SCSs =  4
>XP_016874533.1 protein MON2 homolog isoform X3 [Homo sapiens]
 >SarsCov2Spike_Specifiedy_by_Mizuno-san
 humanProteinID =  99642 , srsCov2ProteinID =  0
SQPFL
SVLND
ILSRL
LDKVE
common SCSs =  4
>XP_016874534.1 protein MON2 homolog isoform X3 [Homo sapiens]
 >SarsCov2Spike_Specifiedy_by_Mizuno-san
 humanProteinID =  99643 , srsCov2ProteinID =  0
SQPFL
SVLND
ILSRL
LDKVE
common SCSs =  4
>XP_016874762.1 phosphatidylinositol phosphatase PTPRQ isoform X1 [Homo sapiens]
 >SarsCov2Spike_Specifiedy_by_Mizuno-san
 humanProteinID =  99811 , srsCov2ProteinID =  0
RFPNI
VKQLS
SVLND
VLNDI
common SCSs =  4
>XP_016874763.1 phosphatidylinositol phosphatase PTPRQ isoform X2 [Homo sapiens]
 >SarsCov2Spike_Specifiedy_by_Mizuno-san
 humanProteinID =  99812 , srsCov2ProteinID =  0
RFPNI
VKQLS
SVLND
VLNDI
common SCSs =  4
>XP_016875653.1 neuron navigator 3 isoform X1 [Homo sapiens]
 >SarsCov2Spike_Specifiedy_by_Mizuno-san
 humanProteinID =  100412 , srsCov2ProteinID =  0
TITSG
TGRLQ
GRLQS
RLQSL
common SCSs =  4
>XP_016875654.1 neuron navigator 3 isoform X2 [Homo sapiens]
 >SarsCov2Spike_Specifiedy_by_Mizuno-san
 humanProteinID =  100413 , srsCov2ProteinID =  0
TITSG
TGRLQ
GRLQS
RLQSL
common SCSs =  4
>XP_016875655.1 neuron navigator 3 isoform X6 [Homo sapiens]
 >SarsCov2Spike_Specifiedy_by_Mizuno-san
 humanProteinID =  100414 , srsCov2ProteinID =  0
TITSG
TGRLQ
GRLQS
RLQSL
common SCSs =  4
>XP_016875656.1 neuron navigator 3 isoform X7 [Homo sapiens]
 >SarsCov2Spike_Specifiedy_by_Mizuno-san
 humanProteinID =  100415 , srsCov2ProteinID =  0
TITSG
TGRLQ
GRLQS
RLQSL
common SCSs =  4
>XP_016875657.1 neuron navigator 3 isoform X8 [Homo sapiens]
 >SarsCov2Spike_Specifiedy_by_Mizuno-san
 humanProteinID =  100416 , srsCov2ProteinID =  0
TITSG
TGRLQ
GRLQS
RLQSL
common SCSs =  4
>XP_016875658.1 neuron navigator 3 isoform X9 [Homo sapiens]
 >SarsCov2Spike_Specifiedy_by_Mizuno-san
 humanProteinID =  100417 , srsCov2ProteinID =  0
TITSG
TGRLQ
GRLQS
RLQSL
common SCSs =  4
>XP_016875659.1 neuron navigator 3 isoform X11 [Homo sapiens]
 >SarsCov2Spike_Specifiedy_by_Mizuno-san
 humanProteinID =  100418 , srsCov2ProteinID =  0
TITSG
TGRLQ
GRLQS
RLQSL
common SCSs =  4
>XP_016875660.1 neuron navigator 3 isoform X12 [Homo sapiens]
 >SarsCov2Spike_Specifiedy_by_Mizuno-san
 humanProteinID =  100419 , srsCov2ProteinID =  0
TITSG
TGRLQ
GRLQS
RLQSL
common SCSs =  4
>XP_016875661.1 neuron navigator 3 isoform X13 [Homo sapiens]
 >SarsCov2Spike_Specifiedy_by_Mizuno-san
 humanProteinID =  100420 , srsCov2ProteinID =  0
TITSG
TGRLQ
GRLQS
RLQSL
common SCSs =  4
>XP_016875662.1 neuron navigator 3 isoform X14 [Homo sapiens]
 >SarsCov2Spike_Specifiedy_by_Mizuno-san
 humanProteinID =  100421 , srsCov2ProteinID =  0
TITSG
TGRLQ
GRLQS
RLQSL
common SCSs =  4
>XP_016875663.1 neuron navigator 3 isoform X15 [Homo sapiens]
 >SarsCov2Spike_Specifiedy_by_Mizuno-san
 humanProteinID =  100422 , srsCov2ProteinID =  0
TITSG
TGRLQ
GRLQS
RLQSL
common SCSs =  4
>XP_016875664.1 neuron navigator 3 isoform X16 [Homo sapiens]
 >SarsCov2Spike_Specifiedy_by_Mizuno-san
 humanProteinID =  100423 , srsCov2ProteinID =  0
TITSG
TGRLQ
GRLQS
RLQSL
common SCSs =  4
>XP_016875945.1 E3 ubiquitin-protein ligase MYCBP2 isoform X11 [Homo sapiens]
 >SarsCov2Spike_Specifiedy_by_Mizuno-san
 humanProteinID =  100641 , srsCov2ProteinID =  0
NGTIT
TASAL
ASALG
RLDKV
common SCSs =  4
>XP_016875946.1 E3 ubiquitin-protein ligase MYCBP2 isoform X12 [Homo sapiens]
 >SarsCov2Spike_Specifiedy_by_Mizuno-san
 humanProteinID =  100642 , srsCov2ProteinID =  0
NGTIT
TASAL
ASALG
RLDKV
common SCSs =  4
>XP_016875947.1 E3 ubiquitin-protein ligase MYCBP2 isoform X13 [Homo sapiens]
 >SarsCov2Spike_Specifiedy_by_Mizuno-san
 humanProteinID =  100643 , srsCov2ProteinID =  0
NGTIT
TASAL
ASALG
RLDKV
common SCSs =  4
>XP_016875948.1 E3 ubiquitin-protein ligase MYCBP2 isoform X18 [Homo sapiens]
 >SarsCov2Spike_Specifiedy_by_Mizuno-san
 humanProteinID =  100644 , srsCov2ProteinID =  0
NGTIT
TASAL
ASALG
RLDKV
common SCSs =  4
>XP_016875950.1 E3 ubiquitin-protein ligase MYCBP2 isoform X20 [Homo sapiens]
 >SarsCov2Spike_Specifiedy_by_Mizuno-san
 humanProteinID =  100646 , srsCov2ProteinID =  0
NGTIT
TASAL
ASALG
RLDKV
common SCSs =  4
>XP_016875951.1 E3 ubiquitin-protein ligase MYCBP2 isoform X21 [Homo sapiens]
 >SarsCov2Spike_Specifiedy_by_Mizuno-san
 humanProteinID =  100647 , srsCov2ProteinID =  0
NGTIT
TASAL
ASALG
RLDKV
common SCSs =  4
>XP_016875952.1 E3 ubiquitin-protein ligase MYCBP2 isoform X22 [Homo sapiens]
 >SarsCov2Spike_Specifiedy_by_Mizuno-san
 humanProteinID =  100648 , srsCov2ProteinID =  0
NGTIT
TASAL
ASALG
RLDKV
common SCSs =  4
>XP_016875953.1 E3 ubiquitin-protein ligase MYCBP2 isoform X23 [Homo sapiens]
 >SarsCov2Spike_Specifiedy_by_Mizuno-san
 humanProteinID =  100649 , srsCov2ProteinID =  0
NGTIT
TASAL
ASALG
RLDKV
common SCSs =  4
>XP_016875954.1 E3 ubiquitin-protein ligase MYCBP2 isoform X24 [Homo sapiens]
 >SarsCov2Spike_Specifiedy_by_Mizuno-san
 humanProteinID =  100650 , srsCov2ProteinID =  0
NGTIT
TASAL
ASALG
RLDKV
common SCSs =  4
>XP_016875955.1 E3 ubiquitin-protein ligase MYCBP2 isoform X25 [Homo sapiens]
 >SarsCov2Spike_Specifiedy_by_Mizuno-san
 humanProteinID =  100651 , srsCov2ProteinID =  0
NGTIT
TASAL
ASALG
RLDKV
common SCSs =  4
>XP_016875956.1 E3 ubiquitin-protein ligase MYCBP2 isoform X26 [Homo sapiens]
 >SarsCov2Spike_Specifiedy_by_Mizuno-san
 humanProteinID =  100652 , srsCov2ProteinID =  0
NGTIT
TASAL
ASALG
RLDKV
common SCSs =  4
>XP_016876033.1 neurobeachin isoform X4 [Homo sapiens]
 >SarsCov2Spike_Specifiedy_by_Mizuno-san
 humanProteinID =  100704 , srsCov2ProteinID =  0
FRVYS
RVYST
VNQNA
DEDDS
common SCSs =  4
>XP_016876034.1 neurobeachin isoform X7 [Homo sapiens]
 >SarsCov2Spike_Specifiedy_by_Mizuno-san
 humanProteinID =  100705 , srsCov2ProteinID =  0
FRVYS
RVYST
VNQNA
DEDDS
common SCSs =  4
>XP_016876035.1 neurobeachin isoform X8 [Homo sapiens]
 >SarsCov2Spike_Specifiedy_by_Mizuno-san
 humanProteinID =  100706 , srsCov2ProteinID =  0
FRVYS
RVYST
VNQNA
DEDDS
common SCSs =  4
>XP_016876637.1 E3 ubiquitin-protein ligase HECTD1 isoform X3 [Homo sapiens]
 >SarsCov2Spike_Specifiedy_by_Mizuno-san
 humanProteinID =  101123 , srsCov2ProteinID =  0
LVDLP
VDLPI
PRTFL
DILSR
common SCSs =  4
>XP_016876638.1 E3 ubiquitin-protein ligase HECTD1 isoform X4 [Homo sapiens]
 >SarsCov2Spike_Specifiedy_by_Mizuno-san
 humanProteinID =  101124 , srsCov2ProteinID =  0
LVDLP
VDLPI
PRTFL
DILSR
common SCSs =  4
>XP_016876640.1 E3 ubiquitin-protein ligase HECTD1 isoform X6 [Homo sapiens]
 >SarsCov2Spike_Specifiedy_by_Mizuno-san
 humanProteinID =  101125 , srsCov2ProteinID =  0
LVDLP
VDLPI
PRTFL
DILSR
common SCSs =  4
>XP_016876641.1 E3 ubiquitin-protein ligase HECTD1 isoform X7 [Homo sapiens]
 >SarsCov2Spike_Specifiedy_by_Mizuno-san
 humanProteinID =  101126 , srsCov2ProteinID =  0
LVDLP
VDLPI
PRTFL
DILSR
common SCSs =  4
>XP_016876642.1 E3 ubiquitin-protein ligase HECTD1 isoform X7 [Homo sapiens]
 >SarsCov2Spike_Specifiedy_by_Mizuno-san
 humanProteinID =  101127 , srsCov2ProteinID =  0
LVDLP
VDLPI
PRTFL
DILSR
common SCSs =  4
>XP_016876652.1 signal-induced proliferation-associated 1-like protein 1 isoform X1 [Homo sapiens]
 >SarsCov2Spike_Specifiedy_by_Mizuno-san
 humanProteinID =  101133 , srsCov2ProteinID =  0
SASFS
QAGST
AGSTP
DSLSS
common SCSs =  4
>XP_016876666.1 signal-induced proliferation-associated 1-like protein 1 isoform X1 [Homo sapiens]
 >SarsCov2Spike_Specifiedy_by_Mizuno-san
 humanProteinID =  101134 , srsCov2ProteinID =  0
SASFS
QAGST
AGSTP
DSLSS
common SCSs =  4
>XP_016876667.1 signal-induced proliferation-associated 1-like protein 1 isoform X1 [Homo sapiens]
 >SarsCov2Spike_Specifiedy_by_Mizuno-san
 humanProteinID =  101135 , srsCov2ProteinID =  0
SASFS
QAGST
AGSTP
DSLSS
common SCSs =  4
>XP_016876668.1 signal-induced proliferation-associated 1-like protein 1 isoform X1 [Homo sapiens]
 >SarsCov2Spike_Specifiedy_by_Mizuno-san
 humanProteinID =  101136 , srsCov2ProteinID =  0
SASFS
QAGST
AGSTP
DSLSS
common SCSs =  4
>XP_016876669.1 signal-induced proliferation-associated 1-like protein 1 isoform X1 [Homo sapiens]
 >SarsCov2Spike_Specifiedy_by_Mizuno-san
 humanProteinID =  101137 , srsCov2ProteinID =  0
SASFS
QAGST
AGSTP
DSLSS
common SCSs =  4
>XP_016876674.1 signal-induced proliferation-associated 1-like protein 1 isoform X2 [Homo sapiens]
 >SarsCov2Spike_Specifiedy_by_Mizuno-san
 humanProteinID =  101138 , srsCov2ProteinID =  0
SASFS
QAGST
AGSTP
DSLSS
common SCSs =  4
>XP_016877276.1 thyroid receptor-interacting protein 11 isoform X1 [Homo sapiens]
 >SarsCov2Spike_Specifiedy_by_Mizuno-san
 humanProteinID =  101542 , srsCov2ProteinID =  0
QTLLA
LQSLQ
EELDK
ELDKY
common SCSs =  4
>XP_016877277.1 thyroid receptor-interacting protein 11 isoform X2 [Homo sapiens]
 >SarsCov2Spike_Specifiedy_by_Mizuno-san
 humanProteinID =  101543 , srsCov2ProteinID =  0
QTLLA
LQSLQ
EELDK
ELDKY
common SCSs =  4
>XP_016877921.1 kinetochore scaffold 1 isoform X1 [Homo sapiens]
 >SarsCov2Spike_Specifiedy_by_Mizuno-san
 humanProteinID =  102005 , srsCov2ProteinID =  0
ADTTD
VKQIY
LQELG
QELGK
common SCSs =  4
>XP_016878176.1 protein dispatched homolog 2 isoform X1 [Homo sapiens]
 >SarsCov2Spike_Specifiedy_by_Mizuno-san
 humanProteinID =  102183 , srsCov2ProteinID =  0
LLALH
LALHR
GDSSS
TVYDP
common SCSs =  4
>XP_016878224.1 inositol hexakisphosphate and diphosphoinositol-pentakisphosphate kinase 1 isoform X1 [Homo sapiens]
 >SarsCov2Spike_Specifiedy_by_Mizuno-san
 humanProteinID =  102231 , srsCov2ProteinID =  0
DPLSE
RLFRK
DSLSS
EPQII
common SCSs =  4
>XP_016878225.1 inositol hexakisphosphate and diphosphoinositol-pentakisphosphate kinase 1 isoform X1 [Homo sapiens]
 >SarsCov2Spike_Specifiedy_by_Mizuno-san
 humanProteinID =  102232 , srsCov2ProteinID =  0
DPLSE
RLFRK
DSLSS
EPQII
common SCSs =  4
>XP_016878226.1 inositol hexakisphosphate and diphosphoinositol-pentakisphosphate kinase 1 isoform X1 [Homo sapiens]
 >SarsCov2Spike_Specifiedy_by_Mizuno-san
 humanProteinID =  102233 , srsCov2ProteinID =  0
DPLSE
RLFRK
DSLSS
EPQII
common SCSs =  4
>XP_016878227.1 inositol hexakisphosphate and diphosphoinositol-pentakisphosphate kinase 1 isoform X2 [Homo sapiens]
 >SarsCov2Spike_Specifiedy_by_Mizuno-san
 humanProteinID =  102234 , srsCov2ProteinID =  0
DPLSE
RLFRK
DSLSS
EPQII
common SCSs =  4
>XP_016878228.1 inositol hexakisphosphate and diphosphoinositol-pentakisphosphate kinase 1 isoform X3 [Homo sapiens]
 >SarsCov2Spike_Specifiedy_by_Mizuno-san
 humanProteinID =  102235 , srsCov2ProteinID =  0
DPLSE
RLFRK
DSLSS
EPQII
common SCSs =  4
>XP_016878230.1 inositol hexakisphosphate and diphosphoinositol-pentakisphosphate kinase 1 isoform X4 [Homo sapiens]
 >SarsCov2Spike_Specifiedy_by_Mizuno-san
 humanProteinID =  102236 , srsCov2ProteinID =  0
DPLSE
RLFRK
DSLSS
EPQII
common SCSs =  4
>XP_016878236.1 inositol hexakisphosphate and diphosphoinositol-pentakisphosphate kinase 1 isoform X5 [Homo sapiens]
 >SarsCov2Spike_Specifiedy_by_Mizuno-san
 humanProteinID =  102237 , srsCov2ProteinID =  0
DPLSE
RLFRK
DSLSS
EPQII
common SCSs =  4
>XP_016878237.1 inositol hexakisphosphate and diphosphoinositol-pentakisphosphate kinase 1 isoform X6 [Homo sapiens]
 >SarsCov2Spike_Specifiedy_by_Mizuno-san
 humanProteinID =  102238 , srsCov2ProteinID =  0
DPLSE
RLFRK
DSLSS
EPQII
common SCSs =  4
>XP_016878242.1 inositol hexakisphosphate and diphosphoinositol-pentakisphosphate kinase 1 isoform X7 [Homo sapiens]
 >SarsCov2Spike_Specifiedy_by_Mizuno-san
 humanProteinID =  102239 , srsCov2ProteinID =  0
DPLSE
RLFRK
DSLSS
EPQII
common SCSs =  4
>XP_016878243.1 inositol hexakisphosphate and diphosphoinositol-pentakisphosphate kinase 1 isoform X8 [Homo sapiens]
 >SarsCov2Spike_Specifiedy_by_Mizuno-san
 humanProteinID =  102240 , srsCov2ProteinID =  0
DPLSE
RLFRK
DSLSS
EPQII
common SCSs =  4
>XP_016878528.1 NLR family CARD domain-containing protein 3 isoform X4 [Homo sapiens]
 >SarsCov2Spike_Specifiedy_by_Mizuno-san
 humanProteinID =  102423 , srsCov2ProteinID =  0
NIIRG
AAAYY
SKVGG
ALLAG
common SCSs =  4
>XP_016878555.1 serine/threonine-protein kinase SMG1 isoform X3 [Homo sapiens]
 >SarsCov2Spike_Specifiedy_by_Mizuno-san
 humanProteinID =  102447 , srsCov2ProteinID =  0
AVRDP
LLLQY
LVKQL
VYDPL
common SCSs =  4
>XP_016878677.1 general transcription factor 3C polypeptide 1 isoform X1 [Homo sapiens]
 >SarsCov2Spike_Specifiedy_by_Mizuno-san
 humanProteinID =  102533 , srsCov2ProteinID =  0
FSALE
NGLTV
RASAN
ASANL
common SCSs =  4
>XP_016878835.1 hydrocephalus-inducing protein homolog isoform X3 [Homo sapiens]
 >SarsCov2Spike_Specifiedy_by_Mizuno-san
 humanProteinID =  102648 , srsCov2ProteinID =  0
QLPPA
IYQAG
ILPVS
VLPPL
common SCSs =  4
>XP_016879466.1 putative short-chain dehydrogenase/reductase family 42E member 2 isoform X1 [Homo sapiens]
 >SarsCov2Spike_Specifiedy_by_Mizuno-san
 humanProteinID =  103096 , srsCov2ProteinID =  0
AGSTP
ADQLT
LPPLL
PPLLT
common SCSs =  4
>XP_016879467.1 putative short-chain dehydrogenase/reductase family 42E member 2 isoform X2 [Homo sapiens]
 >SarsCov2Spike_Specifiedy_by_Mizuno-san
 humanProteinID =  103097 , srsCov2ProteinID =  0
AGSTP
ADQLT
LPPLL
PPLLT
common SCSs =  4
>XP_016879553.1 chromodomain-helicase-DNA-binding protein 3 isoform X9 [Homo sapiens]
 >SarsCov2Spike_Specifiedy_by_Mizuno-san
 humanProteinID =  103164 , srsCov2ProteinID =  0
LVRDL
LPPLL
ILSRL
PVLKG
common SCSs =  4
>XP_016879559.1 chromodomain-helicase-DNA-binding protein 3 isoform X17 [Homo sapiens]
 >SarsCov2Spike_Specifiedy_by_Mizuno-san
 humanProteinID =  103170 , srsCov2ProteinID =  0
LVRDL
LPPLL
ILSRL
PVLKG
common SCSs =  4
>XP_016879639.1 kinesin-like protein KIF19 isoform X1 [Homo sapiens]
 >SarsCov2Spike_Specifiedy_by_Mizuno-san
 humanProteinID =  103232 , srsCov2ProteinID =  0
PGDSS
IAQYT
AQYTS
EVQID
common SCSs =  4
>XP_016879640.1 kinesin-like protein KIF19 isoform X2 [Homo sapiens]
 >SarsCov2Spike_Specifiedy_by_Mizuno-san
 humanProteinID =  103233 , srsCov2ProteinID =  0
PGDSS
IAQYT
AQYTS
EVQID
common SCSs =  4
>XP_016879641.1 kinesin-like protein KIF19 isoform X4 [Homo sapiens]
 >SarsCov2Spike_Specifiedy_by_Mizuno-san
 humanProteinID =  103234 , srsCov2ProteinID =  0
PGDSS
IAQYT
AQYTS
EVQID
common SCSs =  4
>XP_016879642.1 kinesin-like protein KIF19 isoform X5 [Homo sapiens]
 >SarsCov2Spike_Specifiedy_by_Mizuno-san
 humanProteinID =  103235 , srsCov2ProteinID =  0
PGDSS
IAQYT
AQYTS
EVQID
common SCSs =  4
>XP_016879643.1 kinesin-like protein KIF19 isoform X7 [Homo sapiens]
 >SarsCov2Spike_Specifiedy_by_Mizuno-san
 humanProteinID =  103236 , srsCov2ProteinID =  0
PGDSS
IAQYT
AQYTS
EVQID
common SCSs =  4
>XP_016879644.1 kinesin-like protein KIF19 isoform X8 [Homo sapiens]
 >SarsCov2Spike_Specifiedy_by_Mizuno-san
 humanProteinID =  103237 , srsCov2ProteinID =  0
PGDSS
IAQYT
AQYTS
EVQID
common SCSs =  4
>XP_016879645.1 kinesin-like protein KIF19 isoform X9 [Homo sapiens]
 >SarsCov2Spike_Specifiedy_by_Mizuno-san
 humanProteinID =  103238 , srsCov2ProteinID =  0
PGDSS
IAQYT
AQYTS
EVQID
common SCSs =  4
>XP_016879646.1 kinesin-like protein KIF19 isoform X10 [Homo sapiens]
 >SarsCov2Spike_Specifiedy_by_Mizuno-san
 humanProteinID =  103239 , srsCov2ProteinID =  0
PGDSS
IAQYT
AQYTS
EVQID
common SCSs =  4
>XP_016879647.1 kinesin-like protein KIF19 isoform X11 [Homo sapiens]
 >SarsCov2Spike_Specifiedy_by_Mizuno-san
 humanProteinID =  103240 , srsCov2ProteinID =  0
PGDSS
IAQYT
AQYTS
EVQID
common SCSs =  4
>XP_016880722.1 ubiquitin carboxyl-terminal hydrolase 32 isoform X8 [Homo sapiens]
 >SarsCov2Spike_Specifiedy_by_Mizuno-san
 humanProteinID =  104007 , srsCov2ProteinID =  0
IIRGW
CSFGG
SSVLN
EKNFT
common SCSs =  4
>XP_016880885.1 nuclear receptor corepressor 1 isoform X1 [Homo sapiens]
 >SarsCov2Spike_Specifiedy_by_Mizuno-san
 humanProteinID =  104126 , srsCov2ProteinID =  0
GTNGT
YNSAS
SVITP
GAENS
common SCSs =  4
>XP_016880886.1 nuclear receptor corepressor 1 isoform X1 [Homo sapiens]
 >SarsCov2Spike_Specifiedy_by_Mizuno-san
 humanProteinID =  104127 , srsCov2ProteinID =  0
GTNGT
YNSAS
SVITP
GAENS
common SCSs =  4
>XP_016880887.1 nuclear receptor corepressor 1 isoform X1 [Homo sapiens]
 >SarsCov2Spike_Specifiedy_by_Mizuno-san
 humanProteinID =  104128 , srsCov2ProteinID =  0
GTNGT
YNSAS
SVITP
GAENS
common SCSs =  4
>XP_016880888.1 nuclear receptor corepressor 1 isoform X1 [Homo sapiens]
 >SarsCov2Spike_Specifiedy_by_Mizuno-san
 humanProteinID =  104129 , srsCov2ProteinID =  0
GTNGT
YNSAS
SVITP
GAENS
common SCSs =  4
>XP_016880889.1 nuclear receptor corepressor 1 isoform X2 [Homo sapiens]
 >SarsCov2Spike_Specifiedy_by_Mizuno-san
 humanProteinID =  104130 , srsCov2ProteinID =  0
GTNGT
YNSAS
SVITP
GAENS
common SCSs =  4
>XP_016880890.1 nuclear receptor corepressor 1 isoform X2 [Homo sapiens]
 >SarsCov2Spike_Specifiedy_by_Mizuno-san
 humanProteinID =  104131 , srsCov2ProteinID =  0
GTNGT
YNSAS
SVITP
GAENS
common SCSs =  4
>XP_016880891.1 nuclear receptor corepressor 1 isoform X2 [Homo sapiens]
 >SarsCov2Spike_Specifiedy_by_Mizuno-san
 humanProteinID =  104132 , srsCov2ProteinID =  0
GTNGT
YNSAS
SVITP
GAENS
common SCSs =  4
>XP_016880892.1 nuclear receptor corepressor 1 isoform X4 [Homo sapiens]
 >SarsCov2Spike_Specifiedy_by_Mizuno-san
 humanProteinID =  104133 , srsCov2ProteinID =  0
GTNGT
YNSAS
SVITP
GAENS
common SCSs =  4
>XP_016880893.1 nuclear receptor corepressor 1 isoform X4 [Homo sapiens]
 >SarsCov2Spike_Specifiedy_by_Mizuno-san
 humanProteinID =  104134 , srsCov2ProteinID =  0
GTNGT
YNSAS
SVITP
GAENS
common SCSs =  4
>XP_016880894.1 nuclear receptor corepressor 1 isoform X4 [Homo sapiens]
 >SarsCov2Spike_Specifiedy_by_Mizuno-san
 humanProteinID =  104135 , srsCov2ProteinID =  0
GTNGT
YNSAS
SVITP
GAENS
common SCSs =  4
>XP_016880895.1 nuclear receptor corepressor 1 isoform X4 [Homo sapiens]
 >SarsCov2Spike_Specifiedy_by_Mizuno-san
 humanProteinID =  104136 , srsCov2ProteinID =  0
GTNGT
YNSAS
SVITP
GAENS
common SCSs =  4
>XP_016880896.1 nuclear receptor corepressor 1 isoform X4 [Homo sapiens]
 >SarsCov2Spike_Specifiedy_by_Mizuno-san
 humanProteinID =  104137 , srsCov2ProteinID =  0
GTNGT
YNSAS
SVITP
GAENS
common SCSs =  4
>XP_016880897.1 nuclear receptor corepressor 1 isoform X4 [Homo sapiens]
 >SarsCov2Spike_Specifiedy_by_Mizuno-san
 humanProteinID =  104138 , srsCov2ProteinID =  0
GTNGT
YNSAS
SVITP
GAENS
common SCSs =  4
>XP_016880898.1 nuclear receptor corepressor 1 isoform X5 [Homo sapiens]
 >SarsCov2Spike_Specifiedy_by_Mizuno-san
 humanProteinID =  104139 , srsCov2ProteinID =  0
GTNGT
YNSAS
SVITP
GAENS
common SCSs =  4
>XP_016880899.1 nuclear receptor corepressor 1 isoform X5 [Homo sapiens]
 >SarsCov2Spike_Specifiedy_by_Mizuno-san
 humanProteinID =  104140 , srsCov2ProteinID =  0
GTNGT
YNSAS
SVITP
GAENS
common SCSs =  4
>XP_016880900.1 nuclear receptor corepressor 1 isoform X5 [Homo sapiens]
 >SarsCov2Spike_Specifiedy_by_Mizuno-san
 humanProteinID =  104141 , srsCov2ProteinID =  0
GTNGT
YNSAS
SVITP
GAENS
common SCSs =  4
>XP_016880901.1 nuclear receptor corepressor 1 isoform X5 [Homo sapiens]
 >SarsCov2Spike_Specifiedy_by_Mizuno-san
 humanProteinID =  104142 , srsCov2ProteinID =  0
GTNGT
YNSAS
SVITP
GAENS
common SCSs =  4
>XP_016880902.1 nuclear receptor corepressor 1 isoform X5 [Homo sapiens]
 >SarsCov2Spike_Specifiedy_by_Mizuno-san
 humanProteinID =  104143 , srsCov2ProteinID =  0
GTNGT
YNSAS
SVITP
GAENS
common SCSs =  4
>XP_016880903.1 nuclear receptor corepressor 1 isoform X5 [Homo sapiens]
 >SarsCov2Spike_Specifiedy_by_Mizuno-san
 humanProteinID =  104144 , srsCov2ProteinID =  0
GTNGT
YNSAS
SVITP
GAENS
common SCSs =  4
>XP_016880904.1 nuclear receptor corepressor 1 isoform X9 [Homo sapiens]
 >SarsCov2Spike_Specifiedy_by_Mizuno-san
 humanProteinID =  104145 , srsCov2ProteinID =  0
GTNGT
YNSAS
SVITP
GAENS
common SCSs =  4
>XP_016880905.1 nuclear receptor corepressor 1 isoform X10 [Homo sapiens]
 >SarsCov2Spike_Specifiedy_by_Mizuno-san
 humanProteinID =  104146 , srsCov2ProteinID =  0
GTNGT
YNSAS
SVITP
GAENS
common SCSs =  4
>XP_016880907.1 nuclear receptor corepressor 1 isoform X14 [Homo sapiens]
 >SarsCov2Spike_Specifiedy_by_Mizuno-san
 humanProteinID =  104148 , srsCov2ProteinID =  0
GTNGT
YNSAS
SVITP
GAENS
common SCSs =  4
>XP_016880908.1 nuclear receptor corepressor 1 isoform X15 [Homo sapiens]
 >SarsCov2Spike_Specifiedy_by_Mizuno-san
 humanProteinID =  104149 , srsCov2ProteinID =  0
GTNGT
YNSAS
SVITP
GAENS
common SCSs =  4
>XP_016881232.1 laminin subunit alpha-3 isoform X6 [Homo sapiens]
 >SarsCov2Spike_Specifiedy_by_Mizuno-san
 humanProteinID =  104363 , srsCov2ProteinID =  0
LVLLP
EKGIY
SASFS
DLQEL
common SCSs =  4
>XP_016881498.1 FH1/FH2 domain-containing protein 3 isoform X11 [Homo sapiens]
 >SarsCov2Spike_Specifiedy_by_Mizuno-san
 humanProteinID =  104541 , srsCov2ProteinID =  0
GLTVL
LTVLP
TVLPP
DVDLG
common SCSs =  4
>XP_016882639.1 pleckstrin homology domain-containing family G member 2 isoform X3 [Homo sapiens]
 >SarsCov2Spike_Specifiedy_by_Mizuno-san
 humanProteinID =  105358 , srsCov2ProteinID =  0
SLSST
RASAN
LQELG
QELGK
common SCSs =  4
>XP_016882640.1 pleckstrin homology domain-containing family G member 2 isoform X4 [Homo sapiens]
 >SarsCov2Spike_Specifiedy_by_Mizuno-san
 humanProteinID =  105359 , srsCov2ProteinID =  0
SLSST
RASAN
LQELG
QELGK
common SCSs =  4
>XP_016882931.1 coiled-coil domain-containing protein 97 isoform X1 [Homo sapiens]
 >SarsCov2Spike_Specifiedy_by_Mizuno-san
 humanProteinID =  105580 , srsCov2ProteinID =  0
SNLLL
NLLLQ
DKVEA
YEQYI
common SCSs =  4
>XP_016883228.1 nuclear receptor coactivator 6 isoform X1 [Homo sapiens]
 >SarsCov2Spike_Specifiedy_by_Mizuno-san
 humanProteinID =  105806 , srsCov2ProteinID =  0
LDSKT
LPQGF
LQPRT
VPAQE
common SCSs =  4
>XP_016883229.1 nuclear receptor coactivator 6 isoform X1 [Homo sapiens]
 >SarsCov2Spike_Specifiedy_by_Mizuno-san
 humanProteinID =  105807 , srsCov2ProteinID =  0
LDSKT
LPQGF
LQPRT
VPAQE
common SCSs =  4
>XP_016883230.1 nuclear receptor coactivator 6 isoform X2 [Homo sapiens]
 >SarsCov2Spike_Specifiedy_by_Mizuno-san
 humanProteinID =  105808 , srsCov2ProteinID =  0
LDSKT
LPQGF
LQPRT
VPAQE
common SCSs =  4
>XP_016883231.1 nuclear receptor coactivator 6 isoform X3 [Homo sapiens]
 >SarsCov2Spike_Specifiedy_by_Mizuno-san
 humanProteinID =  105809 , srsCov2ProteinID =  0
LDSKT
LPQGF
LQPRT
VPAQE
common SCSs =  4
>XP_016883232.1 nuclear receptor coactivator 6 isoform X5 [Homo sapiens]
 >SarsCov2Spike_Specifiedy_by_Mizuno-san
 humanProteinID =  105810 , srsCov2ProteinID =  0
LDSKT
LPQGF
LQPRT
VPAQE
common SCSs =  4
>XP_016883233.1 nuclear receptor coactivator 6 isoform X8 [Homo sapiens]
 >SarsCov2Spike_Specifiedy_by_Mizuno-san
 humanProteinID =  105811 , srsCov2ProteinID =  0
LDSKT
LPQGF
LQPRT
VPAQE
common SCSs =  4
>XP_016883235.1 nuclear receptor coactivator 6 isoform X10 [Homo sapiens]
 >SarsCov2Spike_Specifiedy_by_Mizuno-san
 humanProteinID =  105813 , srsCov2ProteinID =  0
LDSKT
LPQGF
LQPRT
VPAQE
common SCSs =  4
>XP_016883236.1 nuclear receptor coactivator 6 isoform X12 [Homo sapiens]
 >SarsCov2Spike_Specifiedy_by_Mizuno-san
 humanProteinID =  105814 , srsCov2ProteinID =  0
LDSKT
LPQGF
LQPRT
VPAQE
common SCSs =  4
>XP_016883237.1 nuclear receptor coactivator 6 isoform X13 [Homo sapiens]
 >SarsCov2Spike_Specifiedy_by_Mizuno-san
 humanProteinID =  105815 , srsCov2ProteinID =  0
LPQGF
LQPRT
QTRAG
VPAQE
common SCSs =  4
>XP_016883238.1 nuclear receptor coactivator 6 isoform X14 [Homo sapiens]
 >SarsCov2Spike_Specifiedy_by_Mizuno-san
 humanProteinID =  105816 , srsCov2ProteinID =  0
LPQGF
LQPRT
QTRAG
VPAQE
common SCSs =  4
>XP_016883962.1 nuclear receptor-interacting protein 1 isoform X1 [Homo sapiens]
 >SarsCov2Spike_Specifiedy_by_Mizuno-san
 humanProteinID =  106328 , srsCov2ProteinID =  0
TQSLL
PPLLT
ALLAG
IDRLN
common SCSs =  4
>XP_016883963.1 nuclear receptor-interacting protein 1 isoform X1 [Homo sapiens]
 >SarsCov2Spike_Specifiedy_by_Mizuno-san
 humanProteinID =  106329 , srsCov2ProteinID =  0
TQSLL
PPLLT
ALLAG
IDRLN
common SCSs =  4
>XP_016883964.1 nuclear receptor-interacting protein 1 isoform X1 [Homo sapiens]
 >SarsCov2Spike_Specifiedy_by_Mizuno-san
 humanProteinID =  106330 , srsCov2ProteinID =  0
TQSLL
PPLLT
ALLAG
IDRLN
common SCSs =  4
>XP_016883965.1 nuclear receptor-interacting protein 1 isoform X1 [Homo sapiens]
 >SarsCov2Spike_Specifiedy_by_Mizuno-san
 humanProteinID =  106331 , srsCov2ProteinID =  0
TQSLL
PPLLT
ALLAG
IDRLN
common SCSs =  4
>XP_016883996.1 uromodulin-like 1 isoform X2 [Homo sapiens]
 >SarsCov2Spike_Specifiedy_by_Mizuno-san
 humanProteinID =  106356 , srsCov2ProteinID =  0
VIRGD
KSNLK
LGDIA
SNGTH
common SCSs =  4
>XP_016884501.1 unconventional myosin-XVIIIb isoform X1 [Homo sapiens]
 >SarsCov2Spike_Specifiedy_by_Mizuno-san
 humanProteinID =  106680 , srsCov2ProteinID =  0
TVEKG
LPDPS
GFIKQ
SSVLN
common SCSs =  4
>XP_016884502.1 unconventional myosin-XVIIIb isoform X1 [Homo sapiens]
 >SarsCov2Spike_Specifiedy_by_Mizuno-san
 humanProteinID =  106681 , srsCov2ProteinID =  0
TVEKG
LPDPS
GFIKQ
SSVLN
common SCSs =  4
>XP_016884503.1 unconventional myosin-XVIIIb isoform X4 [Homo sapiens]
 >SarsCov2Spike_Specifiedy_by_Mizuno-san
 humanProteinID =  106682 , srsCov2ProteinID =  0
TVEKG
LPDPS
GFIKQ
SSVLN
common SCSs =  4
>XP_016884504.1 unconventional myosin-XVIIIb isoform X5 [Homo sapiens]
 >SarsCov2Spike_Specifiedy_by_Mizuno-san
 humanProteinID =  106683 , srsCov2ProteinID =  0
TVEKG
LPDPS
GFIKQ
SSVLN
common SCSs =  4
>XP_016884905.1 protocadherin-11 X-linked isoform X1 [Homo sapiens]
 >SarsCov2Spike_Specifiedy_by_Mizuno-san
 humanProteinID =  106976 , srsCov2ProteinID =  0
ALHRS
AGTIT
AQEKN
DNTFV
common SCSs =  4
>XP_016884906.1 protocadherin-11 X-linked isoform X2 [Homo sapiens]
 >SarsCov2Spike_Specifiedy_by_Mizuno-san
 humanProteinID =  106977 , srsCov2ProteinID =  0
ALHRS
AGTIT
AQEKN
DNTFV
common SCSs =  4
>XP_016884907.1 protocadherin-11 X-linked isoform X4 [Homo sapiens]
 >SarsCov2Spike_Specifiedy_by_Mizuno-san
 humanProteinID =  106978 , srsCov2ProteinID =  0
ALHRS
AGTIT
AQEKN
DNTFV
common SCSs =  4
>XP_016884908.1 protocadherin-11 X-linked isoform X7 [Homo sapiens]
 >SarsCov2Spike_Specifiedy_by_Mizuno-san
 humanProteinID =  106979 , srsCov2ProteinID =  0
ALHRS
AGTIT
AQEKN
DNTFV
common SCSs =  4
>XP_016884909.1 protocadherin-11 X-linked isoform X8 [Homo sapiens]
 >SarsCov2Spike_Specifiedy_by_Mizuno-san
 humanProteinID =  106980 , srsCov2ProteinID =  0
ALHRS
AGTIT
AQEKN
DNTFV
common SCSs =  4
>XP_016885230.1 serine/threonine-protein kinase WNK3 isoform X1 [Homo sapiens]
 >SarsCov2Spike_Specifiedy_by_Mizuno-san
 humanProteinID =  107237 , srsCov2ProteinID =  0
DSKTQ
SKTQS
SVAYS
FNKVT
common SCSs =  4
>XP_016885231.1 serine/threonine-protein kinase WNK3 isoform X1 [Homo sapiens]
 >SarsCov2Spike_Specifiedy_by_Mizuno-san
 humanProteinID =  107238 , srsCov2ProteinID =  0
DSKTQ
SKTQS
SVAYS
FNKVT
common SCSs =  4
>XP_016885232.1 serine/threonine-protein kinase WNK3 isoform X1 [Homo sapiens]
 >SarsCov2Spike_Specifiedy_by_Mizuno-san
 humanProteinID =  107239 , srsCov2ProteinID =  0
DSKTQ
SKTQS
SVAYS
FNKVT
common SCSs =  4
>XP_016885233.1 serine/threonine-protein kinase WNK3 isoform X1 [Homo sapiens]
 >SarsCov2Spike_Specifiedy_by_Mizuno-san
 humanProteinID =  107240 , srsCov2ProteinID =  0
DSKTQ
SKTQS
SVAYS
FNKVT
common SCSs =  4
>XP_016885234.1 serine/threonine-protein kinase WNK3 isoform X2 [Homo sapiens]
 >SarsCov2Spike_Specifiedy_by_Mizuno-san
 humanProteinID =  107241 , srsCov2ProteinID =  0
DSKTQ
SKTQS
SVAYS
FNKVT
common SCSs =  4
>XP_016885568.1 protocadherin-11 Y-linked isoform X1 [Homo sapiens]
 >SarsCov2Spike_Specifiedy_by_Mizuno-san
 humanProteinID =  107508 , srsCov2ProteinID =  0
ALHRS
AGTIT
AQEKN
DNTFV
common SCSs =  4
>XP_016885569.1 protocadherin-11 Y-linked isoform X1 [Homo sapiens]
 >SarsCov2Spike_Specifiedy_by_Mizuno-san
 humanProteinID =  107509 , srsCov2ProteinID =  0
ALHRS
AGTIT
AQEKN
DNTFV
common SCSs =  4
>XP_016885570.1 protocadherin-11 Y-linked isoform X1 [Homo sapiens]
 >SarsCov2Spike_Specifiedy_by_Mizuno-san
 humanProteinID =  107510 , srsCov2ProteinID =  0
ALHRS
AGTIT
AQEKN
DNTFV
common SCSs =  4
>XP_024301918.1 histone-lysine N-methyltransferase, H3 lysine-36 specific isoform X1 [Homo sapiens]
 >SarsCov2Spike_Specifiedy_by_Mizuno-san
 humanProteinID =  107727 , srsCov2ProteinID =  0
LVSSQ
KDFGG
SKPSK
PELDS
common SCSs =  4
>XP_024301919.1 histone-lysine N-methyltransferase, H3 lysine-36 specific isoform X1 [Homo sapiens]
 >SarsCov2Spike_Specifiedy_by_Mizuno-san
 humanProteinID =  107728 , srsCov2ProteinID =  0
LVSSQ
KDFGG
SKPSK
PELDS
common SCSs =  4
>XP_024301920.1 histone-lysine N-methyltransferase, H3 lysine-36 specific isoform X1 [Homo sapiens]
 >SarsCov2Spike_Specifiedy_by_Mizuno-san
 humanProteinID =  107729 , srsCov2ProteinID =  0
LVSSQ
KDFGG
SKPSK
PELDS
common SCSs =  4
>XP_024301921.1 histone-lysine N-methyltransferase, H3 lysine-36 specific isoform X1 [Homo sapiens]
 >SarsCov2Spike_Specifiedy_by_Mizuno-san
 humanProteinID =  107730 , srsCov2ProteinID =  0
LVSSQ
KDFGG
SKPSK
PELDS
common SCSs =  4
>XP_024301922.1 histone-lysine N-methyltransferase, H3 lysine-36 specific isoform X2 [Homo sapiens]
 >SarsCov2Spike_Specifiedy_by_Mizuno-san
 humanProteinID =  107731 , srsCov2ProteinID =  0
LVSSQ
KDFGG
SKPSK
PELDS
common SCSs =  4
>XP_024301923.1 histone-lysine N-methyltransferase, H3 lysine-36 specific isoform X3 [Homo sapiens]
 >SarsCov2Spike_Specifiedy_by_Mizuno-san
 humanProteinID =  107732 , srsCov2ProteinID =  0
LVSSQ
KDFGG
SKPSK
PELDS
common SCSs =  4
>XP_024301924.1 histone-lysine N-methyltransferase, H3 lysine-36 specific isoform X3 [Homo sapiens]
 >SarsCov2Spike_Specifiedy_by_Mizuno-san
 humanProteinID =  107733 , srsCov2ProteinID =  0
LVSSQ
KDFGG
SKPSK
PELDS
common SCSs =  4
>XP_024301926.1 histone-lysine N-methyltransferase, H3 lysine-36 specific isoform X3 [Homo sapiens]
 >SarsCov2Spike_Specifiedy_by_Mizuno-san
 humanProteinID =  107734 , srsCov2ProteinID =  0
LVSSQ
KDFGG
SKPSK
PELDS
common SCSs =  4
>XP_024301927.1 histone-lysine N-methyltransferase, H3 lysine-36 specific isoform X4 [Homo sapiens]
 >SarsCov2Spike_Specifiedy_by_Mizuno-san
 humanProteinID =  107735 , srsCov2ProteinID =  0
LVSSQ
KDFGG
SKPSK
PELDS
common SCSs =  4
>XP_024301951.1 ciliogenesis and planar polarity effector 1 isoform X9 [Homo sapiens]
 >SarsCov2Spike_Specifiedy_by_Mizuno-san
 humanProteinID =  107750 , srsCov2ProteinID =  0
NLCPF
VLPPL
ENQKL
CVLGQ
common SCSs =  4
>XP_024301952.1 ciliogenesis and planar polarity effector 1 isoform X10 [Homo sapiens]
 >SarsCov2Spike_Specifiedy_by_Mizuno-san
 humanProteinID =  107751 , srsCov2ProteinID =  0
NLCPF
VLPPL
ENQKL
CVLGQ
common SCSs =  4
>XP_024301953.1 ciliogenesis and planar polarity effector 1 isoform X11 [Homo sapiens]
 >SarsCov2Spike_Specifiedy_by_Mizuno-san
 humanProteinID =  107752 , srsCov2ProteinID =  0
NLCPF
VLPPL
ENQKL
CVLGQ
common SCSs =  4
>XP_024301954.1 ciliogenesis and planar polarity effector 1 isoform X13 [Homo sapiens]
 >SarsCov2Spike_Specifiedy_by_Mizuno-san
 humanProteinID =  107753 , srsCov2ProteinID =  0
NLCPF
VLPPL
ENQKL
CVLGQ
common SCSs =  4
>XP_024301958.1 sodium-dependent proline transporter isoform X2 [Homo sapiens]
 >SarsCov2Spike_Specifiedy_by_Mizuno-san
 humanProteinID =  107757 , srsCov2ProteinID =  0
TLLAL
GAGAA
AALQI
LKGVK
common SCSs =  4
>XP_024302178.1 glutamate receptor ionotropic, kainate 2 isoform X2 [Homo sapiens]
 >SarsCov2Spike_Specifiedy_by_Mizuno-san
 humanProteinID =  107948 , srsCov2ProteinID =  0
ASALG
ANLAA
FVTQR
VTQRN
common SCSs =  4
>XP_024302179.1 glutamate receptor ionotropic, kainate 2 isoform X3 [Homo sapiens]
 >SarsCov2Spike_Specifiedy_by_Mizuno-san
 humanProteinID =  107949 , srsCov2ProteinID =  0
ASALG
ANLAA
FVTQR
VTQRN
common SCSs =  4
>XP_024302229.1 AT-hook DNA-binding motif-containing protein 1 isoform X1 [Homo sapiens]
 >SarsCov2Spike_Specifiedy_by_Mizuno-san
 humanProteinID =  107992 , srsCov2ProteinID =  0
ALEPL
ALDPL
PSKRS
FKEEL
common SCSs =  4
>XP_024302265.1 NHS-like protein 1 isoform X14 [Homo sapiens]
 >SarsCov2Spike_Specifiedy_by_Mizuno-san
 humanProteinID =  108025 , srsCov2ProteinID =  0
IAIPT
NIQKE
LNESL
NESLI
common SCSs =  4
>XP_024302758.1 maltase-glucoamylase, intestinal isoform X2 [Homo sapiens]
 >SarsCov2Spike_Specifiedy_by_Mizuno-san
 humanProteinID =  108422 , srsCov2ProteinID =  0
FTRGV
YQTSN
QILPD
KRSFI
common SCSs =  4
>XP_024303537.1 sorbin and SH3 domain-containing protein 1 isoform X5 [Homo sapiens]
 >SarsCov2Spike_Specifiedy_by_Mizuno-san
 humanProteinID =  109065 , srsCov2ProteinID =  0
STQDL
FNFNG
RSVAS
DIAAR
common SCSs =  4
>XP_024303538.1 sorbin and SH3 domain-containing protein 1 isoform X8 [Homo sapiens]
 >SarsCov2Spike_Specifiedy_by_Mizuno-san
 humanProteinID =  109066 , srsCov2ProteinID =  0
STQDL
FNFNG
RSVAS
DIAAR
common SCSs =  4
>XP_024304073.1 protein enabled homolog isoform X1 [Homo sapiens]
 >SarsCov2Spike_Specifiedy_by_Mizuno-san
 humanProteinID =  109556 , srsCov2ProteinID =  0
ATRFA
RRARS
SALLA
DSEPV
common SCSs =  4
>XP_024304074.1 protein enabled homolog isoform X2 [Homo sapiens]
 >SarsCov2Spike_Specifiedy_by_Mizuno-san
 humanProteinID =  109557 , srsCov2ProteinID =  0
ATRFA
RRARS
SALLA
DSEPV
common SCSs =  4
>XP_024304075.1 protein enabled homolog isoform X3 [Homo sapiens]
 >SarsCov2Spike_Specifiedy_by_Mizuno-san
 humanProteinID =  109558 , srsCov2ProteinID =  0
ATRFA
RRARS
SALLA
DSEPV
common SCSs =  4
>XP_024304076.1 protein enabled homolog isoform X4 [Homo sapiens]
 >SarsCov2Spike_Specifiedy_by_Mizuno-san
 humanProteinID =  109559 , srsCov2ProteinID =  0
ATRFA
RRARS
SALLA
DSEPV
common SCSs =  4
>XP_024304086.1 protein enabled homolog isoform X19 [Homo sapiens]
 >SarsCov2Spike_Specifiedy_by_Mizuno-san
 humanProteinID =  109569 , srsCov2ProteinID =  0
ATRFA
RRARS
SALLA
DSEPV
common SCSs =  4
>XP_024304087.1 protein enabled homolog isoform X20 [Homo sapiens]
 >SarsCov2Spike_Specifiedy_by_Mizuno-san
 humanProteinID =  109570 , srsCov2ProteinID =  0
ATRFA
RRARS
SALLA
DSEPV
common SCSs =  4
>XP_024304124.1 pleckstrin homology domain-containing family A member 7 isoform X1 [Homo sapiens]
 >SarsCov2Spike_Specifiedy_by_Mizuno-san
 humanProteinID =  109603 , srsCov2ProteinID =  0
RKSNL
SPRRA
PRRAR
LQTYV
common SCSs =  4
>XP_024304125.1 pleckstrin homology domain-containing family A member 7 isoform X2 [Homo sapiens]
 >SarsCov2Spike_Specifiedy_by_Mizuno-san
 humanProteinID =  109604 , srsCov2ProteinID =  0
RKSNL
SPRRA
PRRAR
LQTYV
common SCSs =  4
>XP_024304126.1 pleckstrin homology domain-containing family A member 7 isoform X3 [Homo sapiens]
 >SarsCov2Spike_Specifiedy_by_Mizuno-san
 humanProteinID =  109605 , srsCov2ProteinID =  0
RKSNL
SPRRA
PRRAR
LQTYV
common SCSs =  4
>XP_024304127.1 pleckstrin homology domain-containing family A member 7 isoform X4 [Homo sapiens]
 >SarsCov2Spike_Specifiedy_by_Mizuno-san
 humanProteinID =  109606 , srsCov2ProteinID =  0
RKSNL
SPRRA
PRRAR
LQTYV
common SCSs =  4
>XP_024304128.1 pleckstrin homology domain-containing family A member 7 isoform X5 [Homo sapiens]
 >SarsCov2Spike_Specifiedy_by_Mizuno-san
 humanProteinID =  109607 , srsCov2ProteinID =  0
RKSNL
SPRRA
PRRAR
LQTYV
common SCSs =  4
>XP_024304129.1 pleckstrin homology domain-containing family A member 7 isoform X6 [Homo sapiens]
 >SarsCov2Spike_Specifiedy_by_Mizuno-san
 humanProteinID =  109608 , srsCov2ProteinID =  0
RKSNL
SPRRA
PRRAR
LQTYV
common SCSs =  4
>XP_024304130.1 pleckstrin homology domain-containing family A member 7 isoform X7 [Homo sapiens]
 >SarsCov2Spike_Specifiedy_by_Mizuno-san
 humanProteinID =  109609 , srsCov2ProteinID =  0
RKSNL
SPRRA
PRRAR
LQTYV
common SCSs =  4
>XP_024304131.1 pleckstrin homology domain-containing family A member 7 isoform X8 [Homo sapiens]
 >SarsCov2Spike_Specifiedy_by_Mizuno-san
 humanProteinID =  109610 , srsCov2ProteinID =  0
RKSNL
SPRRA
PRRAR
LQTYV
common SCSs =  4
>XP_024304132.1 pleckstrin homology domain-containing family A member 7 isoform X9 [Homo sapiens]
 >SarsCov2Spike_Specifiedy_by_Mizuno-san
 humanProteinID =  109611 , srsCov2ProteinID =  0
RKSNL
SPRRA
PRRAR
LQTYV
common SCSs =  4
>XP_024304133.1 pleckstrin homology domain-containing family A member 7 isoform X10 [Homo sapiens]
 >SarsCov2Spike_Specifiedy_by_Mizuno-san
 humanProteinID =  109612 , srsCov2ProteinID =  0
RKSNL
SPRRA
PRRAR
LQTYV
common SCSs =  4
>XP_024304134.1 pleckstrin homology domain-containing family A member 7 isoform X11 [Homo sapiens]
 >SarsCov2Spike_Specifiedy_by_Mizuno-san
 humanProteinID =  109613 , srsCov2ProteinID =  0
RKSNL
SPRRA
PRRAR
LQTYV
common SCSs =  4
>XP_024304135.1 pleckstrin homology domain-containing family A member 7 isoform X11 [Homo sapiens]
 >SarsCov2Spike_Specifiedy_by_Mizuno-san
 humanProteinID =  109614 , srsCov2ProteinID =  0
RKSNL
SPRRA
PRRAR
LQTYV
common SCSs =  4
>XP_024304136.1 pleckstrin homology domain-containing family A member 7 isoform X11 [Homo sapiens]
 >SarsCov2Spike_Specifiedy_by_Mizuno-san
 humanProteinID =  109615 , srsCov2ProteinID =  0
RKSNL
SPRRA
PRRAR
LQTYV
common SCSs =  4
>XP_024304137.1 pleckstrin homology domain-containing family A member 7 isoform X11 [Homo sapiens]
 >SarsCov2Spike_Specifiedy_by_Mizuno-san
 humanProteinID =  109616 , srsCov2ProteinID =  0
RKSNL
SPRRA
PRRAR
LQTYV
common SCSs =  4
>XP_024304238.1 doublecortin domain-containing protein 1 isoform X1 [Homo sapiens]
 >SarsCov2Spike_Specifiedy_by_Mizuno-san
 humanProteinID =  109699 , srsCov2ProteinID =  0
VSMTK
SMTKT
FDEDD
DEDDS
common SCSs =  4
>XP_024304239.1 doublecortin domain-containing protein 1 isoform X1 [Homo sapiens]
 >SarsCov2Spike_Specifiedy_by_Mizuno-san
 humanProteinID =  109700 , srsCov2ProteinID =  0
VSMTK
SMTKT
FDEDD
DEDDS
common SCSs =  4
>XP_024304240.1 doublecortin domain-containing protein 1 isoform X1 [Homo sapiens]
 >SarsCov2Spike_Specifiedy_by_Mizuno-san
 humanProteinID =  109701 , srsCov2ProteinID =  0
VSMTK
SMTKT
FDEDD
DEDDS
common SCSs =  4
>XP_024304241.1 doublecortin domain-containing protein 1 isoform X1 [Homo sapiens]
 >SarsCov2Spike_Specifiedy_by_Mizuno-san
 humanProteinID =  109702 , srsCov2ProteinID =  0
VSMTK
SMTKT
FDEDD
DEDDS
common SCSs =  4
>XP_024304243.1 doublecortin domain-containing protein 1 isoform X3 [Homo sapiens]
 >SarsCov2Spike_Specifiedy_by_Mizuno-san
 humanProteinID =  109703 , srsCov2ProteinID =  0
VSMTK
SMTKT
FDEDD
DEDDS
common SCSs =  4
>XP_024304244.1 doublecortin domain-containing protein 1 isoform X4 [Homo sapiens]
 >SarsCov2Spike_Specifiedy_by_Mizuno-san
 humanProteinID =  109704 , srsCov2ProteinID =  0
VSMTK
SMTKT
FDEDD
DEDDS
common SCSs =  4
>XP_024304245.1 doublecortin domain-containing protein 1 isoform X5 [Homo sapiens]
 >SarsCov2Spike_Specifiedy_by_Mizuno-san
 humanProteinID =  109705 , srsCov2ProteinID =  0
VSMTK
SMTKT
FDEDD
DEDDS
common SCSs =  4
>XP_024304246.1 doublecortin domain-containing protein 1 isoform X6 [Homo sapiens]
 >SarsCov2Spike_Specifiedy_by_Mizuno-san
 humanProteinID =  109706 , srsCov2ProteinID =  0
VSMTK
SMTKT
FDEDD
DEDDS
common SCSs =  4
>XP_024304247.1 doublecortin domain-containing protein 1 isoform X7 [Homo sapiens]
 >SarsCov2Spike_Specifiedy_by_Mizuno-san
 humanProteinID =  109707 , srsCov2ProteinID =  0
VSMTK
SMTKT
FDEDD
DEDDS
common SCSs =  4
>XP_024304248.1 doublecortin domain-containing protein 1 isoform X8 [Homo sapiens]
 >SarsCov2Spike_Specifiedy_by_Mizuno-san
 humanProteinID =  109708 , srsCov2ProteinID =  0
VSMTK
SMTKT
FDEDD
DEDDS
common SCSs =  4
>XP_024304249.1 doublecortin domain-containing protein 1 isoform X9 [Homo sapiens]
 >SarsCov2Spike_Specifiedy_by_Mizuno-san
 humanProteinID =  109709 , srsCov2ProteinID =  0
VSMTK
SMTKT
FDEDD
DEDDS
common SCSs =  4
>XP_024304526.1 neuron navigator 2 isoform X9 [Homo sapiens]
 >SarsCov2Spike_Specifiedy_by_Mizuno-san
 humanProteinID =  109948 , srsCov2ProteinID =  0
MDLEG
TISVT
FNFSQ
RLQSL
common SCSs =  4
>XP_024305106.1 neurobeachin isoform X9 [Homo sapiens]
 >SarsCov2Spike_Specifiedy_by_Mizuno-san
 humanProteinID =  110480 , srsCov2ProteinID =  0
FRVYS
RVYST
VNQNA
DEDDS
common SCSs =  4
>XP_024305231.1 protein AHNAK2 isoform X1 [Homo sapiens]
 >SarsCov2Spike_Specifiedy_by_Mizuno-san
 humanProteinID =  110591 , srsCov2ProteinID =  0
SALGK
KVEAE
VEAEV
DPLQP
common SCSs =  4
>XP_024305294.1 E3 ubiquitin-protein ligase HECTD1 isoform X2 [Homo sapiens]
 >SarsCov2Spike_Specifiedy_by_Mizuno-san
 humanProteinID =  110651 , srsCov2ProteinID =  0
LVDLP
VDLPI
PRTFL
DILSR
common SCSs =  4
>XP_024305295.1 E3 ubiquitin-protein ligase HECTD1 isoform X5 [Homo sapiens]
 >SarsCov2Spike_Specifiedy_by_Mizuno-san
 humanProteinID =  110652 , srsCov2ProteinID =  0
LVDLP
VDLPI
PRTFL
DILSR
common SCSs =  4
>XP_024305297.1 signal-induced proliferation-associated 1-like protein 1 isoform X1 [Homo sapiens]
 >SarsCov2Spike_Specifiedy_by_Mizuno-san
 humanProteinID =  110654 , srsCov2ProteinID =  0
SASFS
QAGST
AGSTP
DSLSS
common SCSs =  4
>XP_024305298.1 signal-induced proliferation-associated 1-like protein 1 isoform X2 [Homo sapiens]
 >SarsCov2Spike_Specifiedy_by_Mizuno-san
 humanProteinID =  110655 , srsCov2ProteinID =  0
SASFS
QAGST
AGSTP
DSLSS
common SCSs =  4
>XP_024305299.1 signal-induced proliferation-associated 1-like protein 1 isoform X3 [Homo sapiens]
 >SarsCov2Spike_Specifiedy_by_Mizuno-san
 humanProteinID =  110656 , srsCov2ProteinID =  0
SASFS
QAGST
AGSTP
DSLSS
common SCSs =  4
>XP_024305300.1 signal-induced proliferation-associated 1-like protein 1 isoform X3 [Homo sapiens]
 >SarsCov2Spike_Specifiedy_by_Mizuno-san
 humanProteinID =  110657 , srsCov2ProteinID =  0
SASFS
QAGST
AGSTP
DSLSS
common SCSs =  4
>XP_024305301.1 signal-induced proliferation-associated 1-like protein 1 isoform X4 [Homo sapiens]
 >SarsCov2Spike_Specifiedy_by_Mizuno-san
 humanProteinID =  110658 , srsCov2ProteinID =  0
SASFS
QAGST
AGSTP
DSLSS
common SCSs =  4
>XP_024305302.1 signal-induced proliferation-associated 1-like protein 1 isoform X5 [Homo sapiens]
 >SarsCov2Spike_Specifiedy_by_Mizuno-san
 humanProteinID =  110659 , srsCov2ProteinID =  0
SASFS
QAGST
AGSTP
DSLSS
common SCSs =  4
>XP_024305303.1 signal-induced proliferation-associated 1-like protein 1 isoform X6 [Homo sapiens]
 >SarsCov2Spike_Specifiedy_by_Mizuno-san
 humanProteinID =  110660 , srsCov2ProteinID =  0
SASFS
QAGST
AGSTP
DSLSS
common SCSs =  4
>XP_024305759.1 protein FAM214A isoform X1 [Homo sapiens]
 >SarsCov2Spike_Specifiedy_by_Mizuno-san
 humanProteinID =  111075 , srsCov2ProteinID =  0
KVFRS
VFRSS
TLKSF
LGDIS
common SCSs =  4
>XP_024305966.1 serine/threonine-protein kinase SMG1 isoform X5 [Homo sapiens]
 >SarsCov2Spike_Specifiedy_by_Mizuno-san
 humanProteinID =  111254 , srsCov2ProteinID =  0
AVRDP
LLLQY
LVKQL
VYDPL
common SCSs =  4
>XP_024305967.1 serine/threonine-protein kinase SMG1 isoform X5 [Homo sapiens]
 >SarsCov2Spike_Specifiedy_by_Mizuno-san
 humanProteinID =  111255 , srsCov2ProteinID =  0
AVRDP
LLLQY
LVKQL
VYDPL
common SCSs =  4
>XP_024306129.1 caskin-1 isoform X1 [Homo sapiens]
 >SarsCov2Spike_Specifiedy_by_Mizuno-san
 humanProteinID =  111403 , srsCov2ProteinID =  0
GFSAL
ASANL
SANLA
SGINA
common SCSs =  4
>XP_024306372.1 dynein heavy chain 2, axonemal isoform X1 [Homo sapiens]
 >SarsCov2Spike_Specifiedy_by_Mizuno-san
 humanProteinID =  111610 , srsCov2ProteinID =  0
VLLPL
PTESI
PQTLE
TSALL
common SCSs =  4
>XP_024306373.1 dynein heavy chain 2, axonemal isoform X1 [Homo sapiens]
 >SarsCov2Spike_Specifiedy_by_Mizuno-san
 humanProteinID =  111611 , srsCov2ProteinID =  0
VLLPL
PTESI
PQTLE
TSALL
common SCSs =  4
>XP_024306374.1 dynein heavy chain 2, axonemal isoform X3 [Homo sapiens]
 >SarsCov2Spike_Specifiedy_by_Mizuno-san
 humanProteinID =  111612 , srsCov2ProteinID =  0
VLLPL
PTESI
PQTLE
TSALL
common SCSs =  4
>XP_024306375.1 dynein heavy chain 2, axonemal isoform X4 [Homo sapiens]
 >SarsCov2Spike_Specifiedy_by_Mizuno-san
 humanProteinID =  111613 , srsCov2ProteinID =  0
VLLPL
PTESI
PQTLE
TSALL
common SCSs =  4
>XP_024306765.1 calcium/calmodulin-dependent protein kinase kinase 1 isoform X5 [Homo sapiens]
 >SarsCov2Spike_Specifiedy_by_Mizuno-san
 humanProteinID =  111985 , srsCov2ProteinID =  0
LALHR
SNLLL
LPPLL
LSSTA
common SCSs =  4
>XP_024306782.1 dynein heavy chain 17, axonemal isoform X3 [Homo sapiens]
 >SarsCov2Spike_Specifiedy_by_Mizuno-san
 humanProteinID =  112001 , srsCov2ProteinID =  0
RTQLP
LDPLS
KKFLP
LIGAE
common SCSs =  4
>XP_024306809.1 nuclear receptor corepressor 1 isoform X2 [Homo sapiens]
 >SarsCov2Spike_Specifiedy_by_Mizuno-san
 humanProteinID =  112015 , srsCov2ProteinID =  0
GTNGT
YNSAS
SVITP
GAENS
common SCSs =  4
>XP_024306810.1 nuclear receptor corepressor 1 isoform X4 [Homo sapiens]
 >SarsCov2Spike_Specifiedy_by_Mizuno-san
 humanProteinID =  112016 , srsCov2ProteinID =  0
GTNGT
YNSAS
SVITP
GAENS
common SCSs =  4
>XP_024306811.1 nuclear receptor corepressor 1 isoform X5 [Homo sapiens]
 >SarsCov2Spike_Specifiedy_by_Mizuno-san
 humanProteinID =  112017 , srsCov2ProteinID =  0
GTNGT
YNSAS
SVITP
GAENS
common SCSs =  4
>XP_024307576.1 transcription factor-like 5 protein isoform X1 [Homo sapiens]
 >SarsCov2Spike_Specifiedy_by_Mizuno-san
 humanProteinID =  112702 , srsCov2ProteinID =  0
AGAAA
LVKNK
SALLA
GAGAA
common SCSs =  4
>XP_024307577.1 transcription factor-like 5 protein isoform X4 [Homo sapiens]
 >SarsCov2Spike_Specifiedy_by_Mizuno-san
 humanProteinID =  112703 , srsCov2ProteinID =  0
AGAAA
LVKNK
SALLA
GAGAA
common SCSs =  4
>XP_024307578.1 transcription factor-like 5 protein isoform X5 [Homo sapiens]
 >SarsCov2Spike_Specifiedy_by_Mizuno-san
 humanProteinID =  112704 , srsCov2ProteinID =  0
AGAAA
LVKNK
SALLA
GAGAA
common SCSs =  4
>XP_024307579.1 transcription factor-like 5 protein isoform X6 [Homo sapiens]
 >SarsCov2Spike_Specifiedy_by_Mizuno-san
 humanProteinID =  112705 , srsCov2ProteinID =  0
AGAAA
LVKNK
SALLA
GAGAA
common SCSs =  4
>XP_024307580.1 transcription factor-like 5 protein isoform X7 [Homo sapiens]
 >SarsCov2Spike_Specifiedy_by_Mizuno-san
 humanProteinID =  112706 , srsCov2ProteinID =  0
AGAAA
LVKNK
SALLA
GAGAA
common SCSs =  4
>XP_024307581.1 transcription factor-like 5 protein isoform X8 [Homo sapiens]
 >SarsCov2Spike_Specifiedy_by_Mizuno-san
 humanProteinID =  112707 , srsCov2ProteinID =  0
AGAAA
LVKNK
SALLA
GAGAA
common SCSs =  4
>XP_024307774.1 helicase with zinc finger domain 2 isoform X1 [Homo sapiens]
 >SarsCov2Spike_Specifiedy_by_Mizuno-san
 humanProteinID =  112882 , srsCov2ProteinID =  0
AGAAA
RVVVL
VVVLS
RRARS
common SCSs =  4
>XP_024307775.1 helicase with zinc finger domain 2 isoform X2 [Homo sapiens]
 >SarsCov2Spike_Specifiedy_by_Mizuno-san
 humanProteinID =  112883 , srsCov2ProteinID =  0
AGAAA
RVVVL
VVVLS
RRARS
common SCSs =  4
>XP_024308962.1 protein TANC1 isoform X21 [Homo sapiens]
 >SarsCov2Spike_Specifiedy_by_Mizuno-san
 humanProteinID =  113851 , srsCov2ProteinID =  0
TRAGC
KRSFI
RSFIE
FPREG
common SCSs =  4
>XP_024309291.1 microtubule-associated protein 4 isoform X1 [Homo sapiens]
 >SarsCov2Spike_Specifiedy_by_Mizuno-san
 humanProteinID =  114149 , srsCov2ProteinID =  0
PLSET
SPTKL
KPSKR
PSKRS
common SCSs =  4
>XP_024309292.1 microtubule-associated protein 4 isoform X6 [Homo sapiens]
 >SarsCov2Spike_Specifiedy_by_Mizuno-san
 humanProteinID =  114150 , srsCov2ProteinID =  0
PLSET
SPTKL
KPSKR
PSKRS
common SCSs =  4
>XP_024309293.1 microtubule-associated protein 4 isoform X8 [Homo sapiens]
 >SarsCov2Spike_Specifiedy_by_Mizuno-san
 humanProteinID =  114151 , srsCov2ProteinID =  0
PLSET
SPTKL
KPSKR
PSKRS
common SCSs =  4
>XP_024309294.1 microtubule-associated protein 4 isoform X11 [Homo sapiens]
 >SarsCov2Spike_Specifiedy_by_Mizuno-san
 humanProteinID =  114152 , srsCov2ProteinID =  0
PLSET
SPTKL
KPSKR
PSKRS
common SCSs =  4
>XP_024309295.1 microtubule-associated protein 4 isoform X12 [Homo sapiens]
 >SarsCov2Spike_Specifiedy_by_Mizuno-san
 humanProteinID =  114153 , srsCov2ProteinID =  0
PLSET
SPTKL
KPSKR
PSKRS
common SCSs =  4
>XP_024309296.1 microtubule-associated protein 4 isoform X13 [Homo sapiens]
 >SarsCov2Spike_Specifiedy_by_Mizuno-san
 humanProteinID =  114154 , srsCov2ProteinID =  0
PLSET
SPTKL
KPSKR
PSKRS
common SCSs =  4
>XP_024309388.1 histone-lysine N-methyltransferase SETD5 isoform X3 [Homo sapiens]
 >SarsCov2Spike_Specifiedy_by_Mizuno-san
 humanProteinID =  114235 , srsCov2ProteinID =  0
STGSN
GDIAA
AARDL
SLSST
common SCSs =  4
>XP_024309389.1 histone-lysine N-methyltransferase SETD5 isoform X15 [Homo sapiens]
 >SarsCov2Spike_Specifiedy_by_Mizuno-san
 humanProteinID =  114236 , srsCov2ProteinID =  0
STGSN
GDIAA
AARDL
SLSST
common SCSs =  4
>XP_024309676.1 homeodomain-interacting protein kinase 1 isoform X5 [Homo sapiens]
 >SarsCov2Spike_Specifiedy_by_Mizuno-san
 humanProteinID =  114501 , srsCov2ProteinID =  0
GCVIA
QPYRV
VSVIT
ILSRL
common SCSs =  4
>XP_024309860.1 fibroblast growth factor receptor-like 1 isoform X1 [Homo sapiens]
 >SarsCov2Spike_Specifiedy_by_Mizuno-san
 humanProteinID =  114658 , srsCov2ProteinID =  0
DSSSG
LTVLP
LPPLL
VVIGI
common SCSs =  4
>XP_024309861.1 fibroblast growth factor receptor-like 1 isoform X2 [Homo sapiens]
 >SarsCov2Spike_Specifiedy_by_Mizuno-san
 humanProteinID =  114659 , srsCov2ProteinID =  0
DSSSG
LTVLP
LPPLL
VVIGI
common SCSs =  4
>NP_000005.3 alpha-2-macroglobulin isoform a precursor [Homo sapiens]
 >SarsCov2Spike_Specifiedy_by_Mizuno-san
 humanProteinID =  0 , srsCov2ProteinID =  0
LVLLP
SSTAS
FYEPQ
common SCSs =  3
>NP_000028.3 ankyrin-1 isoform 3 [Homo sapiens]
 >SarsCov2Spike_Specifiedy_by_Mizuno-san
 humanProteinID =  21 , srsCov2ProteinID =  0
LLLQY
LLQYG
IITTD
common SCSs =  3
>NP_000043.4 copper-transporting ATPase 1 isoform 1 [Homo sapiens]
 >SarsCov2Spike_Specifiedy_by_Mizuno-san
 humanProteinID =  36 , srsCov2ProteinID =  0
VLTES
LTESN
GLIAI
common SCSs =  3
>NP_000050.3 breast cancer type 2 susceptibility protein [Homo sapiens]
 >SarsCov2Spike_Specifiedy_by_Mizuno-san
 humanProteinID =  42 , srsCov2ProteinID =  0
SLGAE
LAATK
EPVLK
common SCSs =  3
>NP_000072.2 lysosomal-trafficking regulator [Homo sapiens]
 >SarsCov2Spike_Specifiedy_by_Mizuno-san
 humanProteinID =  63 , srsCov2ProteinID =  0
LLPLV
LLHAP
SLSST
common SCSs =  3
>NP_000085.1 collagen alpha-1(VII) chain precursor [Homo sapiens]
 >SarsCov2Spike_Specifiedy_by_Mizuno-san
 humanProteinID =  76 , srsCov2ProteinID =  0
LLPLV
LPLVS
PGQTG
common SCSs =  3
>NP_000129.3 fibrillin-1 preproprotein [Homo sapiens]
 >SarsCov2Spike_Specifiedy_by_Mizuno-san
 humanProteinID =  118 , srsCov2ProteinID =  0
CALDP
CGKGY
SNGTH
common SCSs =  3
>NP_000156.1 gap junction alpha-1 protein [Homo sapiens]
 >SarsCov2Spike_Specifiedy_by_Mizuno-san
 humanProteinID =  145 , srsCov2ProteinID =  0
QAGST
SALGK
ALGKL
common SCSs =  3
>NP_000161.2 glycine dehydrogenase (decarboxylating), mitochondrial precursor [Homo sapiens]
 >SarsCov2Spike_Specifiedy_by_Mizuno-san
 humanProteinID =  150 , srsCov2ProteinID =  0
DSSSG
TGVLT
GVLTE
common SCSs =  3
>NP_000215.1 keratin, type I cytoskeletal 18 [Homo sapiens]
 >SarsCov2Spike_Specifiedy_by_Mizuno-san
 humanProteinID =  203 , srsCov2ProteinID =  0
ASVYA
EELDK
ELDKY
common SCSs =  3
>NP_000277.1 peroxisome assembly protein 12 [Homo sapiens]
 >SarsCov2Spike_Specifiedy_by_Mizuno-san
 humanProteinID =  262 , srsCov2ProteinID =  0
FLVLL
LVLLP
SASFS
common SCSs =  3
>NP_000284.1 phosphorylase b kinase regulatory subunit beta isoform a [Homo sapiens]
 >SarsCov2Spike_Specifiedy_by_Mizuno-san
 humanProteinID =  269 , srsCov2ProteinID =  0
FIKQY
KIQDS
IQDSL
common SCSs =  3
>NP_000287.4 polycystin-1 isoform 2 precursor [Homo sapiens]
 >SarsCov2Spike_Specifiedy_by_Mizuno-san
 humanProteinID =  272 , srsCov2ProteinID =  0
AGAAL
SLSST
VNNTV
common SCSs =  3
>NP_000492.2 elastin isoform a precursor [Homo sapiens]
 >SarsCov2Spike_Specifiedy_by_Mizuno-san
 humanProteinID =  465 , srsCov2ProteinID =  0
TGTGV
FGAGA
GAGAA
common SCSs =  3
>NP_000493.1 eosinophil peroxidase preproprotein [Homo sapiens]
 >SarsCov2Spike_Specifiedy_by_Mizuno-san
 humanProteinID =  466 , srsCov2ProteinID =  0
LLPLV
IVRFP
VRFPN
common SCSs =  3
>NP_000594.2 nitric oxide synthase, endothelial isoform 1 [Homo sapiens]
 >SarsCov2Spike_Specifiedy_by_Mizuno-san
 humanProteinID =  560 , srsCov2ProteinID =  0
PLVSS
RLFRK
VEAEV
common SCSs =  3
>NP_000680.2 retinal dehydrogenase 1 [Homo sapiens]
 >SarsCov2Spike_Specifiedy_by_Mizuno-san
 humanProteinID =  631 , srsCov2ProteinID =  0
FSNVT
TAGAA
KSNLK
common SCSs =  3
>NP_000690.1 pancreatic alpha-amylase precursor [Homo sapiens]
 >SarsCov2Spike_Specifiedy_by_Mizuno-san
 humanProteinID =  640 , srsCov2ProteinID =  0
SNQVA
DGKAH
GKAHF
common SCSs =  3
>NP_000821.1 glutamate receptor ionotropic, kainate 1 isoform 1 precursor [Homo sapiens]
 >SarsCov2Spike_Specifiedy_by_Mizuno-san
 humanProteinID =  760 , srsCov2ProteinID =  0
ASALG
ANLAA
VTQRN
common SCSs =  3
>NP_000822.2 glutamate receptor ionotropic, kainate 3 precursor [Homo sapiens]
 >SarsCov2Spike_Specifiedy_by_Mizuno-san
 humanProteinID =  761 , srsCov2ProteinID =  0
ASALG
ANLAA
VTQRN
common SCSs =  3
>NP_000824.1 glutamate receptor ionotropic, NMDA 2A isoform 1 precursor [Homo sapiens]
 >SarsCov2Spike_Specifiedy_by_Mizuno-san
 humanProteinID =  763 , srsCov2ProteinID =  0
RSVAS
QDSLS
ANLAA
common SCSs =  3
>NP_000911.2 pyruvate carboxylase, mitochondrial precursor [Homo sapiens]
 >SarsCov2Spike_Specifiedy_by_Mizuno-san
 humanProteinID =  845 , srsCov2ProteinID =  0
DKVEA
AATKM
ATKMS
common SCSs =  3
>NP_000923.1 1-phosphatidylinositol 4,5-bisphosphate phosphodiesterase beta-3 isoform 1 [Homo sapiens]
 >SarsCov2Spike_Specifiedy_by_Mizuno-san
 humanProteinID =  856 , srsCov2ProteinID =  0
LVKNK
ILPVS
RLNEV
common SCSs =  3
>NP_000932.3 NADPH--cytochrome P450 reductase isoform 1 [Homo sapiens]
 >SarsCov2Spike_Specifiedy_by_Mizuno-san
 humanProteinID =  865 , srsCov2ProteinID =  0
ESNKK
NVLYE
YENQK
common SCSs =  3
>NP_001001323.1 plasma membrane calcium-transporting ATPase 1 isoform 1a [Homo sapiens]
 >SarsCov2Spike_Specifiedy_by_Mizuno-san
 humanProteinID =  936 , srsCov2ProteinID =  0
NSVAY
SVAYS
SSTAS
common SCSs =  3
>NP_001001479.1 solute carrier family 35 member E4 isoform 1 [Homo sapiens]
 >SarsCov2Spike_Specifiedy_by_Mizuno-san
 humanProteinID =  970 , srsCov2ProteinID =  0
SVLYN
AGAAL
ILSRL
common SCSs =  3
>NP_001001794.3 protein DENND6B [Homo sapiens]
 >SarsCov2Spike_Specifiedy_by_Mizuno-san
 humanProteinID =  1051 , srsCov2ProteinID =  0
TTRTQ
APGQT
PRRAR
common SCSs =  3
>NP_001001922.2 olfactory receptor 52N5 [Homo sapiens]
 >SarsCov2Spike_Specifiedy_by_Mizuno-san
 humanProteinID =  1078 , srsCov2ProteinID =  0
CTMYI
TYVPA
SLIDL
common SCSs =  3
>NP_001002800.1 structural maintenance of chromosomes protein 4 isoform 1 [Homo sapiens]
 >SarsCov2Spike_Specifiedy_by_Mizuno-san
 humanProteinID =  1174 , srsCov2ProteinID =  0
EKSNI
KVEAE
VEAEV
common SCSs =  3
>NP_001003681.1 HMG domain-containing protein 4 isoform 1 [Homo sapiens]
 >SarsCov2Spike_Specifiedy_by_Mizuno-san
 humanProteinID =  1231 , srsCov2ProteinID =  0
DSSSG
AGAAA
SKPSK
common SCSs =  3
>NP_001006600.1 erbin isoform 7 [Homo sapiens]
 >SarsCov2Spike_Specifiedy_by_Mizuno-san
 humanProteinID =  1716 , srsCov2ProteinID =  0
NIIRG
SSTAS
PQSAP
common SCSs =  3
>NP_001007258.1 PR domain zinc finger protein 2 isoform c [Homo sapiens]
 >SarsCov2Spike_Specifiedy_by_Mizuno-san
 humanProteinID =  1827 , srsCov2ProteinID =  0
LPPLL
GIGVT
AISSV
common SCSs =  3
>NP_001008.1 40S ribosomal protein S13 [Homo sapiens]
 >SarsCov2Spike_Specifiedy_by_Mizuno-san
 humanProteinID =  1868 , srsCov2ProteinID =  0
SSTAS
STASA
TASAL
common SCSs =  3
>NP_001008219.1 alpha-amylase 1 precursor [Homo sapiens]
 >SarsCov2Spike_Specifiedy_by_Mizuno-san
 humanProteinID =  1874 , srsCov2ProteinID =  0
SNQVA
DGKAH
GKAHF
common SCSs =  3
>NP_001008220.1 alpha-amylase 1 precursor [Homo sapiens]
 >SarsCov2Spike_Specifiedy_by_Mizuno-san
 humanProteinID =  1875 , srsCov2ProteinID =  0
SNQVA
DGKAH
GKAHF
common SCSs =  3
>NP_001008222.1 alpha-amylase 1 precursor [Homo sapiens]
 >SarsCov2Spike_Specifiedy_by_Mizuno-san
 humanProteinID =  1877 , srsCov2ProteinID =  0
SNQVA
DGKAH
GKAHF
common SCSs =  3
>NP_001008392.2 coiled-coil domain-containing protein 73 [Homo sapiens]
 >SarsCov2Spike_Specifiedy_by_Mizuno-san
 humanProteinID =  1896 , srsCov2ProteinID =  0
STEKS
SVTTE
VTTEI
common SCSs =  3
>NP_001008844.1 desmoplakin isoform II [Homo sapiens]
 >SarsCov2Spike_Specifiedy_by_Mizuno-san
 humanProteinID =  1967 , srsCov2ProteinID =  0
ARDLI
LDKVE
DKVEA
common SCSs =  3
>NP_001009944.3 polycystin-1 isoform 1 precursor [Homo sapiens]
 >SarsCov2Spike_Specifiedy_by_Mizuno-san
 humanProteinID =  2028 , srsCov2ProteinID =  0
AGAAL
SLSST
VNNTV
common SCSs =  3
>NP_001010854.1 tetratricopeptide repeat protein 7B isoform 1 [Homo sapiens]
 >SarsCov2Spike_Specifiedy_by_Mizuno-san
 humanProteinID =  2052 , srsCov2ProteinID =  0
KLIAN
LVKQL
VKQLS
common SCSs =  3
>NP_001010867.1 putative transferase CAF17, mitochondrial isoform 1 precursor [Homo sapiens]
 >SarsCov2Spike_Specifiedy_by_Mizuno-san
 humanProteinID =  2062 , srsCov2ProteinID =  0
VRDLP
TAGAA
AGAAA
common SCSs =  3
>NP_001010893.1 sodium/bile acid cotransporter 5 precursor [Homo sapiens]
 >SarsCov2Spike_Specifiedy_by_Mizuno-san
 humanProteinID =  2082 , srsCov2ProteinID =  0
TLLAL
TNFTI
SFPQS
common SCSs =  3
>NP_001010895.2 DNA excision repair protein ERCC-6-like 2 isoform c [Homo sapiens]
 >SarsCov2Spike_Specifiedy_by_Mizuno-san
 humanProteinID =  2083 , srsCov2ProteinID =  0
SVLYN
GLTGT
LSSTA
common SCSs =  3
>NP_001017424.1 potassium channel subfamily K member 2 isoform a [Homo sapiens]
 >SarsCov2Spike_Specifiedy_by_Mizuno-san
 humanProteinID =  2479 , srsCov2ProteinID =  0
NTSNQ
VLPPL
LPPLL
common SCSs =  3
>NP_001017425.2 potassium channel subfamily K member 2 isoform c [Homo sapiens]
 >SarsCov2Spike_Specifiedy_by_Mizuno-san
 humanProteinID =  2480 , srsCov2ProteinID =  0
NTSNQ
VLPPL
LPPLL
common SCSs =  3
>NP_001017969.2 uncharacterized protein KIAA2026 [Homo sapiens]
 >SarsCov2Spike_Specifiedy_by_Mizuno-san
 humanProteinID =  2518 , srsCov2ProteinID =  0
TNTSN
NKVTL
ALQIP
common SCSs =  3
>NP_001018054.1 mitogen-activated protein kinase kinase kinase 19 isoform 3 [Homo sapiens]
 >SarsCov2Spike_Specifiedy_by_Mizuno-san
 humanProteinID =  2556 , srsCov2ProteinID =  0
LDSKT
VQPTE
DLQEL
common SCSs =  3
>NP_001018098.1 vacuolar protein sorting-associated protein 13C isoform 2B [Homo sapiens]
 >SarsCov2Spike_Specifiedy_by_Mizuno-san
 humanProteinID =  2588 , srsCov2ProteinID =  0
VSVIT
NLLLQ
IQKEI
common SCSs =  3
>NP_001019628.3 RANBP2-like and GRIP domain-containing protein 1 isoform 2 [Homo sapiens]
 >SarsCov2Spike_Specifiedy_by_Mizuno-san
 humanProteinID =  2648 , srsCov2ProteinID =  0
SVLYN
GFNFS
KLQDV
common SCSs =  3
>NP_001025169.1 sodium/bile acid cotransporter 7 isoform b [Homo sapiens]
 >SarsCov2Spike_Specifiedy_by_Mizuno-san
 humanProteinID =  2833 , srsCov2ProteinID =  0
FGAIS
GAISS
KGVKL
common SCSs =  3
>NP_001027005.1 phosphorylase b kinase regulatory subunit beta isoform b [Homo sapiens]
 >SarsCov2Spike_Specifiedy_by_Mizuno-san
 humanProteinID =  2928 , srsCov2ProteinID =  0
FIKQY
KIQDS
IQDSL
common SCSs =  3
>NP_001029097.1 nucleolysin TIAR isoform 2 [Homo sapiens]
 >SarsCov2Spike_Specifiedy_by_Mizuno-san
 humanProteinID =  3062 , srsCov2ProteinID =  0
ASYQT
SYQTQ
DVVNQ
common SCSs =  3
>NP_001030017.2 polypeptide N-acetylgalactosaminyltransferase-like 6 [Homo sapiens]
 >SarsCov2Spike_Specifiedy_by_Mizuno-san
 humanProteinID =  3082 , srsCov2ProteinID =  0
DPLSE
PLSET
LPPLL
common SCSs =  3
>NP_001030127.2 sorbin and SH3 domain-containing protein 1 isoform 4 [Homo sapiens]
 >SarsCov2Spike_Specifiedy_by_Mizuno-san
 humanProteinID =  3089 , srsCov2ProteinID =  0
STQDL
FNFNG
DIAAR
common SCSs =  3
>NP_001030128.2 sorbin and SH3 domain-containing protein 1 isoform 5 [Homo sapiens]
 >SarsCov2Spike_Specifiedy_by_Mizuno-san
 humanProteinID =  3090 , srsCov2ProteinID =  0
STQDL
FNFNG
DIAAR
common SCSs =  3
>NP_001030129.2 sorbin and SH3 domain-containing protein 1 isoform 7 [Homo sapiens]
 >SarsCov2Spike_Specifiedy_by_Mizuno-san
 humanProteinID =  3091 , srsCov2ProteinID =  0
STQDL
FNFNG
DIAAR
common SCSs =  3
>NP_001034553.3 maestro heat-like repeat-containing protein family member 7 isoform 1 [Homo sapiens]
 >SarsCov2Spike_Specifiedy_by_Mizuno-san
 humanProteinID =  3249 , srsCov2ProteinID =  0
DSLSS
DRLNE
RLNEV
common SCSs =  3
>NP_001035743.1 zinc finger protein ZXDC isoform 2 [Homo sapiens]
 >SarsCov2Spike_Specifiedy_by_Mizuno-san
 humanProteinID =  3497 , srsCov2ProteinID =  0
FLVLL
TAGAA
AGAAA
common SCSs =  3
>NP_001035806.1 pyruvate carboxylase, mitochondrial precursor [Homo sapiens]
 >SarsCov2Spike_Specifiedy_by_Mizuno-san
 humanProteinID =  3518 , srsCov2ProteinID =  0
DKVEA
AATKM
ATKMS
common SCSs =  3
>NP_001035889.1 histone-lysine N-methyltransferase NSD2 isoform 1 [Homo sapiens]
 >SarsCov2Spike_Specifiedy_by_Mizuno-san
 humanProteinID =  3561 , srsCov2ProteinID =  0
LLKYN
ICGDS
QKFNG
common SCSs =  3
>NP_001035998.1 ribosomal oxygenase 2 isoform a [Homo sapiens]
 >SarsCov2Spike_Specifiedy_by_Mizuno-san
 humanProteinID =  3625 , srsCov2ProteinID =  0
LTVLP
DGKAH
GKAHF
common SCSs =  3
>NP_001036055.2 transmembrane protein 8B isoform c [Homo sapiens]
 >SarsCov2Spike_Specifiedy_by_Mizuno-san
 humanProteinID =  3657 , srsCov2ProteinID =  0
QLPPA
FASTE
SQPFL
common SCSs =  3
>NP_001056.1 tumor necrosis factor receptor superfamily member 1A isoform 1 precursor [Homo sapiens]
 >SarsCov2Spike_Specifiedy_by_Mizuno-san
 humanProteinID =  3780 , srsCov2ProteinID =  0
VLLPL
LLPLV
EIDRL
common SCSs =  3
>NP_001070649.1 dual specificity protein phosphatase CDC14B isoform 3 [Homo sapiens]
 >SarsCov2Spike_Specifiedy_by_Mizuno-san
 humanProteinID =  3814 , srsCov2ProteinID =  0
GAGAA
AGAAL
YFKNH
common SCSs =  3
>NP_001071638.2 RANBP2-like and GRIP domain-containing protein 2 [Homo sapiens]
 >SarsCov2Spike_Specifiedy_by_Mizuno-san
 humanProteinID =  3927 , srsCov2ProteinID =  0
SVLYN
GFNFS
KLQDV
common SCSs =  3
>NP_001073280.1 protein diaphanous homolog 1 isoform 2 [Homo sapiens]
 >SarsCov2Spike_Specifiedy_by_Mizuno-san
 humanProteinID =  3977 , srsCov2ProteinID =  0
PVLPF
LDSKT
VLTES
common SCSs =  3
>NP_001073606.1 cancer/testis antigen 47A [Homo sapiens]
 >SarsCov2Spike_Specifiedy_by_Mizuno-san
 humanProteinID =  4022 , srsCov2ProteinID =  0
AGAAA
LPPLL
GAGAA
common SCSs =  3
>NP_001073607.1 cancer/testis antigen 47A [Homo sapiens]
 >SarsCov2Spike_Specifiedy_by_Mizuno-san
 humanProteinID =  4023 , srsCov2ProteinID =  0
AGAAA
LPPLL
GAGAA
common SCSs =  3
>NP_001073608.1 cancer/testis antigen 47A [Homo sapiens]
 >SarsCov2Spike_Specifiedy_by_Mizuno-san
 humanProteinID =  4024 , srsCov2ProteinID =  0
AGAAA
LPPLL
GAGAA
common SCSs =  3
>NP_001073609.1 cancer/testis antigen 47A [Homo sapiens]
 >SarsCov2Spike_Specifiedy_by_Mizuno-san
 humanProteinID =  4025 , srsCov2ProteinID =  0
AGAAA
LPPLL
GAGAA
common SCSs =  3
>NP_001073610.1 cancer/testis antigen 47A [Homo sapiens]
 >SarsCov2Spike_Specifiedy_by_Mizuno-san
 humanProteinID =  4026 , srsCov2ProteinID =  0
AGAAA
LPPLL
GAGAA
common SCSs =  3
>NP_001073611.1 cancer/testis antigen 47A [Homo sapiens]
 >SarsCov2Spike_Specifiedy_by_Mizuno-san
 humanProteinID =  4027 , srsCov2ProteinID =  0
AGAAA
LPPLL
GAGAA
common SCSs =  3
>NP_001073612.1 cancer/testis antigen 47A [Homo sapiens]
 >SarsCov2Spike_Specifiedy_by_Mizuno-san
 humanProteinID =  4028 , srsCov2ProteinID =  0
AGAAA
LPPLL
GAGAA
common SCSs =  3
>NP_001073613.1 cancer/testis antigen 47A [Homo sapiens]
 >SarsCov2Spike_Specifiedy_by_Mizuno-san
 humanProteinID =  4029 , srsCov2ProteinID =  0
AGAAA
LPPLL
GAGAA
common SCSs =  3
>NP_001073614.1 cancer/testis antigen 47A [Homo sapiens]
 >SarsCov2Spike_Specifiedy_by_Mizuno-san
 humanProteinID =  4030 , srsCov2ProteinID =  0
AGAAA
LPPLL
GAGAA
common SCSs =  3
>NP_001073615.1 cancer/testis antigen 47A [Homo sapiens]
 >SarsCov2Spike_Specifiedy_by_Mizuno-san
 humanProteinID =  4031 , srsCov2ProteinID =  0
AGAAA
LPPLL
GAGAA
common SCSs =  3
>NP_001073883.2 protein Daple [Homo sapiens]
 >SarsCov2Spike_Specifiedy_by_Mizuno-san
 humanProteinID =  4056 , srsCov2ProteinID =  0
AGAAA
GAGAA
TAPAI
common SCSs =  3
>NP_001073897.2 teneurin-2 isoform 2 [Homo sapiens]
 >SarsCov2Spike_Specifiedy_by_Mizuno-san
 humanProteinID =  4067 , srsCov2ProteinID =  0
LAGTI
AGTIT
QIITT
common SCSs =  3
>NP_001073898.1 calmodulin-regulated spectrin-associated protein 3 isoform 1 [Homo sapiens]
 >SarsCov2Spike_Specifiedy_by_Mizuno-san
 humanProteinID =  4068 , srsCov2ProteinID =  0
GAEHV
PSKPS
SALLA
common SCSs =  3
>NP_001073922.2 integrator complex subunit 1 [Homo sapiens]
 >SarsCov2Spike_Specifiedy_by_Mizuno-san
 humanProteinID =  4089 , srsCov2ProteinID =  0
LPLVS
DPQTL
PQTLE
common SCSs =  3
[truncated: 7,058,056 more chars]
