# Supplementary material for: In Silico and In Vitro Evaluation of the Molecular Mimicry of the SARS-CoV-2 Spike Protein by Common Short Constituent Sequences (cSCSs) in the Human Proteome: Toward Safer Epitope Design for Vaccine Development
Source: Vaccines (Basel). 2024 May 14;12(5):539. doi: 10.3390/vaccines12050539 (PMC11125730; doi:10.3390/vaccines12050539)
Supplement: Supplementary file 1 [file vaccines-12-00539-s001.zip › Supplementary File S2 Spike vs. Human Excel #1.xlsm]

## Sheet: Sheet1
タンパク質名
>NP_001243779.1 titin isoform N2BA [Homo sapiens]
>SarsCov2Spike_Specifiedy_by_Mizuno-san
humanProteinID = 13243 , srsCov2ProteinID = 0
PLVSS
PPAYT
SLLIV
EFRVY
INITR
AGAAA
ALDPL
DPLSE
SNLKP
PKKST
STNLV
TLEIL
LEILD
ILDIT
AENSV
ISVTT
SVTTE
VSMTK
TKTSV
TPPIK
PSKPS
SKPSK
LSSTA
GKLQD
LQDVV
VEAEV
FKEEL
LGDIS
SEPVL
common SCSs = 29
>NP_001254479.2 titin isoform IC [Homo sapiens]
>SarsCov2Spike_Specifiedy_by_Mizuno-san
humanProteinID = 13868 , srsCov2ProteinID = 0
PLVSS
PPAYT
SLLIV
EFRVY
INITR
AGAAA
ALDPL
DPLSE
SNLKP
PKKST
STNLV
TLEIL
LEILD
ILDIT
AENSV
ISVTT
SVTTE
VSMTK
TKTSV
TPPIK
PSKPS
SKPSK
LSSTA
GKLQD
LQDVV
VEAEV
FKEEL
LGDIS
SEPVL
common SCSs = 29
>NP_596869.4 titin isoform N2-A [Homo sapiens]
>SarsCov2Spike_Specifiedy_by_Mizuno-san
humanProteinID = 54159 , srsCov2ProteinID = 0
PLVSS
PPAYT
SLLIV
EFRVY
INITR
AGAAA
ALDPL
DPLSE
SNLKP
PKKST
STNLV
TLEIL
LEILD
ILDIT
AENSV
ISVTT
SVTTE
VSMTK
TKTSV
TPPIK
PSKPS
SKPSK
LSSTA
GKLQD
LQDVV
VEAEV
FKEEL
LGDIS
SEPVL
common SCSs = 29
>XP_016860308.1 titin isoform X1 [Homo sapiens]
>SarsCov2Spike_Specifiedy_by_Mizuno-san
humanProteinID = 90181 , srsCov2ProteinID = 0
PLVSS
PPAYT
SLLIV
EFRVY
INITR
AGAAA
ALDPL
DPLSE
SNLKP
PKKST
STNLV
TLEIL
LEILD
ILDIT
AENSV
ISVTT
SVTTE
VSMTK
TKTSV
TPPIK
PSKPS
SKPSK
LSSTA
GKLQD
LQDVV
VEAEV
FKEEL
LGDIS
SEPVL
common SCSs = 29
>XP_016860309.1 titin isoform X4 [Homo sapiens]
>SarsCov2Spike_Specifiedy_by_Mizuno-san
humanProteinID = 90182 , srsCov2ProteinID = 0
PLVSS
PPAYT
SLLIV
EFRVY
INITR
AGAAA
ALDPL
DPLSE
SNLKP
PKKST
STNLV
TLEIL
LEILD
ILDIT
AENSV
ISVTT
SVTTE
VSMTK
TKTSV
TPPIK
PSKPS
SKPSK
LSSTA
GKLQD
LQDVV
VEAEV
FKEEL
LGDIS
SEPVL
common SCSs = 29
>XP_016860310.1 titin isoform X5 [Homo sapiens]
>SarsCov2Spike_Specifiedy_by_Mizuno-san
humanProteinID = 90183 , srsCov2ProteinID = 0
PLVSS
PPAYT
SLLIV
EFRVY
INITR
AGAAA
ALDPL
DPLSE
SNLKP
PKKST
STNLV
TLEIL
LEILD
ILDIT
AENSV
ISVTT
SVTTE
VSMTK
TKTSV
TPPIK
PSKPS
SKPSK
LSSTA
GKLQD
LQDVV
VEAEV
FKEEL
LGDIS
SEPVL
common SCSs = 29
>XP_016860311.1 titin isoform X7 [Homo sapiens]
>SarsCov2Spike_Specifiedy_by_Mizuno-san
humanProteinID = 90184 , srsCov2ProteinID = 0
PLVSS
PPAYT
SLLIV
EFRVY
INITR
AGAAA
ALDPL
DPLSE
SNLKP
PKKST
STNLV
TLEIL
LEILD
ILDIT
AENSV
ISVTT
SVTTE
VSMTK
TKTSV
TPPIK
PSKPS
SKPSK
LSSTA
GKLQD
LQDVV
FKEEL
LGDIS
SEPVL
common SCSs = 28
>XP_024308862.1 titin isoform X2 [Homo sapiens]
>SarsCov2Spike_Specifiedy_by_Mizuno-san
humanProteinID = 113753 , srsCov2ProteinID = 0
PLVSS
PPAYT
SLLIV
EFRVY
INITR
AGAAA
ALDPL
DPLSE
SNLKP
PKKST
STNLV
TLEIL
LEILD
ILDIT
AENSV
ISVTT
SVTTE
VSMTK
TKTSV
TPPIK
PSKPS
SKPSK
LSSTA
GKLQD
LQDVV
FKEEL
LGDIS
SEPVL
common SCSs = 28
>XP_024308863.1 titin isoform X3 [Homo sapiens]
>SarsCov2Spike_Specifiedy_by_Mizuno-san
humanProteinID = 113754 , srsCov2ProteinID = 0
PLVSS
PPAYT
SLLIV
EFRVY
INITR
AGAAA
ALDPL
DPLSE
SNLKP
PKKST
STNLV
TLEIL
LEILD
ILDIT
AENSV
ISVTT
SVTTE
VSMTK
TKTSV
TPPIK
PSKPS
SKPSK
LSSTA
GKLQD
LQDVV
FKEEL
LGDIS
SEPVL
common SCSs = 28
>XP_024308864.1 titin isoform X6 [Homo sapiens]
>SarsCov2Spike_Specifiedy_by_Mizuno-san
humanProteinID = 113755 , srsCov2ProteinID = 0
PLVSS
PPAYT
SLLIV
EFRVY
INITR
AGAAA
ALDPL
DPLSE
SNLKP
PKKST
STNLV
TLEIL
LEILD
ILDIT
AENSV
ISVTT
SVTTE
VSMTK
TKTSV
TPPIK
PSKPS
SKPSK
LSSTA
GKLQD
LQDVV
FKEEL
LGDIS
SEPVL
common SCSs = 28
>XP_024308865.1 titin isoform X8 [Homo sapiens]
>SarsCov2Spike_Specifiedy_by_Mizuno-san
humanProteinID = 113756 , srsCov2ProteinID = 0
PLVSS
PPAYT
SLLIV
EFRVY
INITR
AGAAA
ALDPL
DPLSE
SNLKP
PKKST
STNLV
TLEIL
LEILD
ILDIT
AENSV
ISVTT
SVTTE
VSMTK
TKTSV
TPPIK
PSKPS
SKPSK
LSSTA
GKLQD
LQDVV
FKEEL
LGDIS
SEPVL
common SCSs = 28
>XP_024308866.1 titin isoform X9 [Homo sapiens]
>SarsCov2Spike_Specifiedy_by_Mizuno-san
humanProteinID = 113757 , srsCov2ProteinID = 0
PLVSS
PPAYT
SLLIV
EFRVY
INITR
AGAAA
ALDPL
DPLSE
SNLKP
PKKST
STNLV
TLEIL
LEILD
ILDIT
AENSV
ISVTT
SVTTE
VSMTK
TKTSV
TPPIK
PSKPS
SKPSK
LSSTA
GKLQD
LQDVV
FKEEL
LGDIS
SEPVL
common SCSs = 28
>NP_003310.4 titin isoform N2-B [Homo sapiens]
>SarsCov2Spike_Specifiedy_by_Mizuno-san
humanProteinID = 42295 , srsCov2ProteinID = 0
PLVSS
PPAYT
SLLIV
EFRVY
INITR
AGAAA
ALDPL
DPLSE
SNLKP
PKKST
STNLV
TLEIL
LEILD
ISVTT
SVTTE
VSMTK
TKTSV
PSKPS
SKPSK
LSSTA
GKLQD
LQDVV
FKEEL
LGDIS
SEPVL
common SCSs = 25
>NP_597676.3 titin isoform novex-1 [Homo sapiens]
>SarsCov2Spike_Specifiedy_by_Mizuno-san
humanProteinID = 54161 , srsCov2ProteinID = 0
PLVSS
PPAYT
SLLIV
EFRVY
INITR
AGAAA
ALDPL
DPLSE
SNLKP
PKKST
STNLV
TLEIL
LEILD
ISVTT
SVTTE
VSMTK
TKTSV
PSKPS
SKPSK
LSSTA
GKLQD
LQDVV
FKEEL
LGDIS
SEPVL
common SCSs = 25
>NP_597681.4 titin isoform novex-2 [Homo sapiens]
>SarsCov2Spike_Specifiedy_by_Mizuno-san
humanProteinID = 54164 , srsCov2ProteinID = 0
PLVSS
PPAYT
SLLIV
EFRVY
INITR
AGAAA
ALDPL
DPLSE
SNLKP
PKKST
STNLV
TLEIL
LEILD
ISVTT
SVTTE
VSMTK
TKTSV
PSKPS
SKPSK
LSSTA
GKLQD
LQDVV
FKEEL
LGDIS
SEPVL
common SCSs = 25
>XP_016860312.1 titin isoform X10 [Homo sapiens]
>SarsCov2Spike_Specifiedy_by_Mizuno-san
humanProteinID = 90185 , srsCov2ProteinID = 0
PLVSS
PPAYT
SLLIV
EFRVY
INITR
AGAAA
ALDPL
DPLSE
SNLKP
PKKST
STNLV
TLEIL
LEILD
ISVTT
SVTTE
VSMTK
TKTSV
PSKPS
SKPSK
LSSTA
GKLQD
LQDVV
FKEEL
LGDIS
SEPVL
common SCSs = 25
>XP_024308867.1 titin isoform X11 [Homo sapiens]
>SarsCov2Spike_Specifiedy_by_Mizuno-san
humanProteinID = 113758 , srsCov2ProteinID = 0
PLVSS
PPAYT
SLLIV
EFRVY
INITR
AGAAA
ALDPL
DPLSE
SNLKP
PKKST
STNLV
TLEIL
LEILD
ISVTT
SVTTE
VSMTK
TKTSV
PSKPS
SKPSK
LSSTA
GKLQD
LQDVV
FKEEL
LGDIS
SEPVL
common SCSs = 25
>XP_024308868.1 titin isoform X12 [Homo sapiens]
>SarsCov2Spike_Specifiedy_by_Mizuno-san
humanProteinID = 113759 , srsCov2ProteinID = 0
PLVSS
PPAYT
SLLIV
EFRVY
INITR
ALDPL
DPLSE
SNLKP
PKKST
STNLV
TLEIL
LEILD
ISVTT
SVTTE
VSMTK
TKTSV
PSKPS
SKPSK
LSSTA
GKLQD
FKEEL
LGDIS
SEPVL
common SCSs = 23
>NP_078966.2 mucin-16 [Homo sapiens]
>SarsCov2Spike_Specifiedy_by_Mizuno-san
humanProteinID = 51610 , srsCov2ProteinID = 0
RSSVL
VLHST
STEKS
TTLDS
TLDSK
SASFS
ASFST
GVSPT
DISTE
VLTES
SLGAE
AIPTN
NFTIS
PVSMT
GDSTE
NRALT
PDPSK
SALLA
SLSST
LSSTA
SSTAS
common SCSs = 21
>XP_016882975.1 mucin-16 isoform X1 [Homo sapiens]
>SarsCov2Spike_Specifiedy_by_Mizuno-san
humanProteinID = 105616 , srsCov2ProteinID = 0
RSSVL
VLHST
STEKS
TTLDS
TLDSK
SASFS
ASFST
GVSPT
DISTE
VLTES
SLGAE
AIPTN
NFTIS
PVSMT
GDSTE
NRALT
PDPSK
SALLA
SLSST
LSSTA
SSTAS
common SCSs = 21
>XP_016882976.1 mucin-16 isoform X2 [Homo sapiens]
>SarsCov2Spike_Specifiedy_by_Mizuno-san
humanProteinID = 105617 , srsCov2ProteinID = 0
RSSVL
VLHST
STEKS
TTLDS
TLDSK
SASFS
ASFST
GVSPT
DISTE
VLTES
SLGAE
AIPTN
NFTIS
PVSMT
GDSTE
NRALT
PDPSK
SALLA
SLSST
LSSTA
SSTAS
common SCSs = 21
>XP_016882977.1 mucin-16 isoform X3 [Homo sapiens]
>SarsCov2Spike_Specifiedy_by_Mizuno-san
humanProteinID = 105618 , srsCov2ProteinID = 0
RSSVL
VLHST
STEKS
TTLDS
TLDSK
SASFS
ASFST
GVSPT
DISTE
VLTES
SLGAE
AIPTN
NFTIS
PVSMT
GDSTE
NRALT
PDPSK
SALLA
SLSST
LSSTA
SSTAS
common SCSs = 21
>XP_016882978.1 mucin-16 isoform X4 [Homo sapiens]
>SarsCov2Spike_Specifiedy_by_Mizuno-san
humanProteinID = 105619 , srsCov2ProteinID = 0
RSSVL
VLHST
STEKS
TTLDS
TLDSK
SASFS
ASFST
GVSPT
DISTE
VLTES
SLGAE
AIPTN
NFTIS
PVSMT
GDSTE
NRALT
PDPSK
SALLA
SLSST
LSSTA
SSTAS
common SCSs = 21
>XP_016882979.1 mucin-16 isoform X5 [Homo sapiens]
>SarsCov2Spike_Specifiedy_by_Mizuno-san
humanProteinID = 105620 , srsCov2ProteinID = 0
RSSVL
VLHST
STEKS
TTLDS
TLDSK
SASFS
ASFST
GVSPT
DISTE
VLTES
SLGAE
AIPTN
NFTIS
PVSMT
GDSTE
NRALT
PDPSK
SALLA
SLSST
LSSTA
SSTAS
common SCSs = 21
>XP_016882980.1 mucin-16 isoform X6 [Homo sapiens]
>SarsCov2Spike_Specifiedy_by_Mizuno-san
humanProteinID = 105621 , srsCov2ProteinID = 0
RSSVL
VLHST
STEKS
TTLDS
TLDSK
SASFS
ASFST
GVSPT
DISTE
VLTES
SLGAE
AIPTN
NFTIS
PVSMT
GDSTE
NRALT
PDPSK
SALLA
SLSST
LSSTA
SSTAS
common SCSs = 21
>XP_016882981.1 mucin-16 isoform X7 [Homo sapiens]
>SarsCov2Spike_Specifiedy_by_Mizuno-san
humanProteinID = 105622 , srsCov2ProteinID = 0
RSSVL
VLHST
STEKS
TTLDS
TLDSK
SASFS
ASFST
GVSPT
DISTE
VLTES
SLGAE
AIPTN
NFTIS
PVSMT
GDSTE
NRALT
PDPSK
SALLA
SLSST
LSSTA
SSTAS
common SCSs = 21
>XP_016882982.1 mucin-16 isoform X8 [Homo sapiens]
>SarsCov2Spike_Specifiedy_by_Mizuno-san
humanProteinID = 105623 , srsCov2ProteinID = 0
RSSVL
VLHST
STEKS
TTLDS
TLDSK
SASFS
ASFST
GVSPT
DISTE
VLTES
SLGAE
AIPTN
NFTIS
PVSMT
GDSTE
NRALT
PDPSK
SALLA
SLSST
LSSTA
SSTAS
common SCSs = 21
>XP_016882983.1 mucin-16 isoform X9 [Homo sapiens]
>SarsCov2Spike_Specifiedy_by_Mizuno-san
humanProteinID = 105624 , srsCov2ProteinID = 0
RSSVL
VLHST
STEKS
TTLDS
TLDSK
SASFS
ASFST
GVSPT
DISTE
VLTES
SLGAE
AIPTN
NFTIS
PVSMT
GDSTE
NRALT
PDPSK
SALLA
SLSST
LSSTA
SSTAS
common SCSs = 21
>XP_016882984.1 mucin-16 isoform X10 [Homo sapiens]
>SarsCov2Spike_Specifiedy_by_Mizuno-san
humanProteinID = 105625 , srsCov2ProteinID = 0
RSSVL
VLHST
STEKS
TTLDS
TLDSK
SASFS
ASFST
GVSPT
DISTE
VLTES
SLGAE
AIPTN
NFTIS
PVSMT
GDSTE
NRALT
PDPSK
SALLA
SLSST
LSSTA
SSTAS
common SCSs = 21
>XP_016882988.1 mucin-16 isoform X11 [Homo sapiens]
>SarsCov2Spike_Specifiedy_by_Mizuno-san
humanProteinID = 105626 , srsCov2ProteinID = 0
RSSVL
VLHST
STEKS
SASFS
ASFST
GVSPT
DISTE
VLTES
SLGAE
AIPTN
NFTIS
NRALT
SLSST
LSSTA
SSTAS
common SCSs = 15
>XP_016882989.1 mucin-16 isoform X12 [Homo sapiens]
>SarsCov2Spike_Specifiedy_by_Mizuno-san
humanProteinID = 105627 , srsCov2ProteinID = 0
RSSVL
VLHST
STEKS
SASFS
ASFST
GVSPT
DISTE
VLTES
SLGAE
AIPTN
NFTIS
NRALT
SLSST
LSSTA
SSTAS
common SCSs = 15
>NP_115495.3 adhesion G-protein coupled receptor V1 precursor [Homo sapiens]
>SarsCov2Spike_Specifiedy_by_Mizuno-san
humanProteinID = 52513 , srsCov2ProteinID = 0
INITR
TAGAA
YSVLY
LPDDF
RDIAD
VAVLY
IGAGI
TNFTI
LGDIA
DDSEP
common SCSs = 10
>XP_016865452.1 adhesion G-protein coupled receptor V1 isoform X1 [Homo sapiens]
>SarsCov2Spike_Specifiedy_by_Mizuno-san
humanProteinID = 93669 , srsCov2ProteinID = 0
INITR
TAGAA
YSVLY
LPDDF
RDIAD
VAVLY
IGAGI
TNFTI
LGDIA
DDSEP
common SCSs = 10
>XP_016865453.1 adhesion G-protein coupled receptor V1 isoform X2 [Homo sapiens]
>SarsCov2Spike_Specifiedy_by_Mizuno-san
humanProteinID = 93670 , srsCov2ProteinID = 0
INITR
TAGAA
YSVLY
LPDDF
RDIAD
VAVLY
IGAGI
TNFTI
LGDIA
DDSEP
common SCSs = 10
>XP_016865454.1 adhesion G-protein coupled receptor V1 isoform X3 [Homo sapiens]
>SarsCov2Spike_Specifiedy_by_Mizuno-san
humanProteinID = 93671 , srsCov2ProteinID = 0
INITR
TAGAA
YSVLY
LPDDF
RDIAD
VAVLY
IGAGI
TNFTI
LGDIA
DDSEP
common SCSs = 10
>XP_016865455.1 adhesion G-protein coupled receptor V1 isoform X4 [Homo sapiens]
>SarsCov2Spike_Specifiedy_by_Mizuno-san
humanProteinID = 93672 , srsCov2ProteinID = 0
INITR
TAGAA
YSVLY
LPDDF
RDIAD
VAVLY
IGAGI
TNFTI
LGDIA
DDSEP
common SCSs = 10
>XP_016865456.1 adhesion G-protein coupled receptor V1 isoform X5 [Homo sapiens]
>SarsCov2Spike_Specifiedy_by_Mizuno-san
humanProteinID = 93673 , srsCov2ProteinID = 0
INITR
TAGAA
YSVLY
LPDDF
RDIAD
VAVLY
IGAGI
TNFTI
LGDIA
DDSEP
common SCSs = 10
>XP_016865457.1 adhesion G-protein coupled receptor V1 isoform X6 [Homo sapiens]
>SarsCov2Spike_Specifiedy_by_Mizuno-san
humanProteinID = 93674 , srsCov2ProteinID = 0
INITR
TAGAA
YSVLY
LPDDF
RDIAD
VAVLY
IGAGI
TNFTI
LGDIA
DDSEP
common SCSs = 10
>XP_016865458.1 adhesion G-protein coupled receptor V1 isoform X7 [Homo sapiens]
>SarsCov2Spike_Specifiedy_by_Mizuno-san
humanProteinID = 93675 , srsCov2ProteinID = 0
INITR
TAGAA
YSVLY
LPDDF
RDIAD
VAVLY
IGAGI
TNFTI
LGDIA
DDSEP
common SCSs = 10
>NP_001027.3 ryanodine receptor 3 isoform 1 [Homo sapiens]
>SarsCov2Spike_Specifiedy_by_Mizuno-san
humanProteinID = 2926 , srsCov2ProteinID = 0
VLLPL
LLPLV
TLLAL
SNNLD
NLLLQ
GWTFG
FVSGN
NASVV
IDRLN
common SCSs = 9
>NP_001230925.1 ryanodine receptor 3 isoform 2 [Homo sapiens]
>SarsCov2Spike_Specifiedy_by_Mizuno-san
humanProteinID = 12425 , srsCov2ProteinID = 0
VLLPL
LLPLV
TLLAL
SNNLD
NLLLQ
GWTFG
FVSGN
NASVV
IDRLN
common SCSs = 9
>XP_011520182.1 ryanodine receptor 3 isoform X9 [Homo sapiens]
>SarsCov2Spike_Specifiedy_by_Mizuno-san
humanProteinID = 75232 , srsCov2ProteinID = 0
VLLPL
LLPLV
TLLAL
SNNLD
NLLLQ
GWTFG
FVSGN
NASVV
IDRLN
common SCSs = 9
>XP_016865459.1 adhesion G-protein coupled receptor V1 isoform X8 [Homo sapiens]
>SarsCov2Spike_Specifiedy_by_Mizuno-san
humanProteinID = 93676 , srsCov2ProteinID = 0
INITR
YSVLY
LPDDF
RDIAD
VAVLY
IGAGI
TNFTI
LGDIA
DDSEP
common SCSs = 9
>XP_016865460.1 adhesion G-protein coupled receptor V1 isoform X9 [Homo sapiens]
>SarsCov2Spike_Specifiedy_by_Mizuno-san
humanProteinID = 93677 , srsCov2ProteinID = 0
INITR
YSVLY
LPDDF
RDIAD
VAVLY
IGAGI
TNFTI
LGDIA
DDSEP
common SCSs = 9
>XP_016866100.1 nesprin-1 isoform X9 [Homo sapiens]
>SarsCov2Spike_Specifiedy_by_Mizuno-san
humanProteinID = 94124 , srsCov2ProteinID = 0
RDLPQ
IAWNS
RSVAS
IYKTP
LGKLQ
LQSLQ
DRLNE
NLNES
DLQEL
common SCSs = 9
>XP_016866101.1 nesprin-1 isoform X12 [Homo sapiens]
>SarsCov2Spike_Specifiedy_by_Mizuno-san
humanProteinID = 94125 , srsCov2ProteinID = 0
RDLPQ
IAWNS
RSVAS
IYKTP
LGKLQ
LQSLQ
DRLNE
NLNES
DLQEL
common SCSs = 9
>XP_016877957.1 ryanodine receptor 3 isoform X1 [Homo sapiens]
>SarsCov2Spike_Specifiedy_by_Mizuno-san
humanProteinID = 102038 , srsCov2ProteinID = 0
VLLPL
LLPLV
TLLAL
SNNLD
NLLLQ
GWTFG
FVSGN
NASVV
IDRLN
common SCSs = 9
>XP_016877958.1 ryanodine receptor 3 isoform X2 [Homo sapiens]
>SarsCov2Spike_Specifiedy_by_Mizuno-san
humanProteinID = 102039 , srsCov2ProteinID = 0
VLLPL
LLPLV
TLLAL
SNNLD
NLLLQ
GWTFG
FVSGN
NASVV
IDRLN
common SCSs = 9
>XP_016877959.1 ryanodine receptor 3 isoform X3 [Homo sapiens]
>SarsCov2Spike_Specifiedy_by_Mizuno-san
humanProteinID = 102040 , srsCov2ProteinID = 0
VLLPL
LLPLV
TLLAL
SNNLD
NLLLQ
GWTFG
FVSGN
NASVV
IDRLN
common SCSs = 9
>XP_016877960.1 ryanodine receptor 3 isoform X4 [Homo sapiens]
>SarsCov2Spike_Specifiedy_by_Mizuno-san
humanProteinID = 102041 , srsCov2ProteinID = 0
VLLPL
LLPLV
TLLAL
SNNLD
NLLLQ
GWTFG
FVSGN
NASVV
IDRLN
common SCSs = 9
>XP_016877961.1 ryanodine receptor 3 isoform X5 [Homo sapiens]
>SarsCov2Spike_Specifiedy_by_Mizuno-san
humanProteinID = 102042 , srsCov2ProteinID = 0
VLLPL
LLPLV
TLLAL
SNNLD
NLLLQ
GWTFG
FVSGN
NASVV
IDRLN
common SCSs = 9
>XP_016877962.1 ryanodine receptor 3 isoform X7 [Homo sapiens]
>SarsCov2Spike_Specifiedy_by_Mizuno-san
humanProteinID = 102043 , srsCov2ProteinID = 0
VLLPL
LLPLV
TLLAL
SNNLD
NLLLQ
GWTFG
FVSGN
NASVV
IDRLN
common SCSs = 9
>XP_016877963.1 ryanodine receptor 3 isoform X8 [Homo sapiens]
>SarsCov2Spike_Specifiedy_by_Mizuno-san
humanProteinID = 102044 , srsCov2ProteinID = 0
VLLPL
LLPLV
TLLAL
SNNLD
NLLLQ
GWTFG
FVSGN
NASVV
IDRLN
common SCSs = 9
>XP_016877964.1 ryanodine receptor 3 isoform X10 [Homo sapiens]
>SarsCov2Spike_Specifiedy_by_Mizuno-san
humanProteinID = 102045 , srsCov2ProteinID = 0
VLLPL
LLPLV
TLLAL
SNNLD
NLLLQ
GWTFG
FVSGN
NASVV
IDRLN
common SCSs = 9
>XP_016877965.1 ryanodine receptor 3 isoform X11 [Homo sapiens]
>SarsCov2Spike_Specifiedy_by_Mizuno-san
humanProteinID = 102046 , srsCov2ProteinID = 0
VLLPL
LLPLV
TLLAL
SNNLD
NLLLQ
GWTFG
FVSGN
NASVV
IDRLN
common SCSs = 9
>XP_016877966.1 ryanodine receptor 3 isoform X12 [Homo sapiens]
>SarsCov2Spike_Specifiedy_by_Mizuno-san
humanProteinID = 102047 , srsCov2ProteinID = 0
VLLPL
LLPLV
TLLAL
SNNLD
NLLLQ
GWTFG
FVSGN
NASVV
IDRLN
common SCSs = 9
>XP_024305783.1 ryanodine receptor 3 isoform X6 [Homo sapiens]
>SarsCov2Spike_Specifiedy_by_Mizuno-san
humanProteinID = 111099 , srsCov2ProteinID = 0
VLLPL
LLPLV
TLLAL
SNNLD
NLLLQ
GWTFG
FVSGN
NASVV
IDRLN
common SCSs = 9
>XP_024305784.1 ryanodine receptor 3 isoform X13 [Homo sapiens]
>SarsCov2Spike_Specifiedy_by_Mizuno-san
humanProteinID = 111100 , srsCov2ProteinID = 0
VLLPL
LLPLV
TLLAL
SNNLD
NLLLQ
GWTFG
FVSGN
NASVV
IDRLN
common SCSs = 9
>NP_001358915.1 protein unc-80 homolog isoform 3 [Homo sapiens]
>SarsCov2Spike_Specifiedy_by_Mizuno-san
humanProteinID = 35082 , srsCov2ProteinID = 0
EPLVD
PLVDL
AGAAA
PDDFT
DDFTG
ECDIP
RRARS
LPDPS
common SCSs = 8
>NP_001371054.1 transmembrane protein KIAA1109 isoform [Homo sapiens]
>SarsCov2Spike_Specifiedy_by_Mizuno-san
humanProteinID = 38674 , srsCov2ProteinID = 0
SSSGW
SSGWT
SGWTA
VLYNS
NFTIS
DSLSS
SLSST
VKLHY
common SCSs = 8
>NP_056127.2 transmembrane protein KIAA1109 isoform 2 [Homo sapiens]
>SarsCov2Spike_Specifiedy_by_Mizuno-san
humanProteinID = 47612 , srsCov2ProteinID = 0
SSSGW
SSGWT
SGWTA
VLYNS
NFTIS
DSLSS
SLSST
VKLHY
common SCSs = 8
>NP_115893.1 protein unc-80 homolog isoform 1 [Homo sapiens]
>SarsCov2Spike_Specifiedy_by_Mizuno-san
humanProteinID = 52797 , srsCov2ProteinID = 0
EPLVD
PLVDL
AGAAA
PDDFT
DDFTG
ECDIP
RRARS
LPDPS
common SCSs = 8
>NP_149062.2 nesprin-1 isoform 2 [Homo sapiens]
>SarsCov2Spike_Specifiedy_by_Mizuno-san
humanProteinID = 53170 , srsCov2ProteinID = 0
RDLPQ
IAWNS
RSVAS
LGKLQ
LQSLQ
DRLNE
NLNES
DLQEL
common SCSs = 8
>NP_872393.3 protein unc-80 homolog isoform 2 [Homo sapiens]
>SarsCov2Spike_Specifiedy_by_Mizuno-san
humanProteinID = 57646 , srsCov2ProteinID = 0
EPLVD
PLVDL
AGAAA
PDDFT
DDFTG
ECDIP
RRARS
LPDPS
common SCSs = 8
>NP_892006.3 nesprin-1 isoform 1 (nesprin-1 giant or enaptin) [Homo sapiens]
>SarsCov2Spike_Specifiedy_by_Mizuno-san
humanProteinID = 57812 , srsCov2ProteinID = 0
RDLPQ
IAWNS
RSVAS
LGKLQ
LQSLQ
DRLNE
NLNES
DLQEL
common SCSs = 8
>XP_005246533.1 protein unc-80 homolog isoform X7 [Homo sapiens]
>SarsCov2Spike_Specifiedy_by_Mizuno-san
humanProteinID = 59642 , srsCov2ProteinID = 0
EPLVD
PLVDL
AGAAA
PDDFT
DDFTG
ECDIP
RRARS
LPDPS
common SCSs = 8
>XP_005263339.1 transmembrane protein KIAA1109 isoform X8 [Homo sapiens]
>SarsCov2Spike_Specifiedy_by_Mizuno-san
humanProteinID = 62875 , srsCov2ProteinID = 0
SSSGW
SSGWT
SGWTA
VLYNS
NFTIS
DSLSS
SLSST
VKLHY
common SCSs = 8
>XP_005263344.1 transmembrane protein KIAA1109 isoform X9 [Homo sapiens]
>SarsCov2Spike_Specifiedy_by_Mizuno-san
humanProteinID = 62876 , srsCov2ProteinID = 0
SSSGW
SSGWT
SGWTA
VLYNS
NFTIS
DSLSS
SLSST
VKLHY
common SCSs = 8
>XP_006714407.1 transmembrane protein KIAA1109 isoform X17 [Homo sapiens]
>SarsCov2Spike_Specifiedy_by_Mizuno-san
humanProteinID = 66319 , srsCov2ProteinID = 0
SSSGW
SSGWT
SGWTA
VLYNS
NFTIS
DSLSS
SLSST
VKLHY
common SCSs = 8
>XP_006715470.1 nesprin-1 isoform X1 [Homo sapiens]
>SarsCov2Spike_Specifiedy_by_Mizuno-san
humanProteinID = 66592 , srsCov2ProteinID = 0
RDLPQ
IAWNS
RSVAS
LGKLQ
LQSLQ
DRLNE
NLNES
DLQEL
common SCSs = 8
>XP_006715471.1 nesprin-1 isoform X3 [Homo sapiens]
>SarsCov2Spike_Specifiedy_by_Mizuno-san
humanProteinID = 66593 , srsCov2ProteinID = 0
RDLPQ
IAWNS
RSVAS
LGKLQ
LQSLQ
DRLNE
NLNES
DLQEL
common SCSs = 8
>XP_006715472.1 nesprin-1 isoform X5 [Homo sapiens]
>SarsCov2Spike_Specifiedy_by_Mizuno-san
humanProteinID = 66594 , srsCov2ProteinID = 0
RDLPQ
IAWNS
RSVAS
LGKLQ
LQSLQ
DRLNE
NLNES
DLQEL
common SCSs = 8
>XP_006715473.1 nesprin-1 isoform X6 [Homo sapiens]
>SarsCov2Spike_Specifiedy_by_Mizuno-san
humanProteinID = 66595 , srsCov2ProteinID = 0
RDLPQ
IAWNS
RSVAS
LGKLQ
LQSLQ
DRLNE
NLNES
DLQEL
common SCSs = 8
>XP_006715474.1 nesprin-1 isoform X7 [Homo sapiens]
>SarsCov2Spike_Specifiedy_by_Mizuno-san
humanProteinID = 66596 , srsCov2ProteinID = 0
RDLPQ
IAWNS
RSVAS
LGKLQ
LQSLQ
DRLNE
NLNES
DLQEL
common SCSs = 8
>XP_006715475.1 nesprin-1 isoform X8 [Homo sapiens]
>SarsCov2Spike_Specifiedy_by_Mizuno-san
humanProteinID = 66597 , srsCov2ProteinID = 0
RDLPQ
IAWNS
RSVAS
LGKLQ
LQSLQ
DRLNE
NLNES
DLQEL
common SCSs = 8
>XP_006715476.1 nesprin-1 isoform X10 [Homo sapiens]
>SarsCov2Spike_Specifiedy_by_Mizuno-san
humanProteinID = 66598 , srsCov2ProteinID = 0
RDLPQ
IAWNS
RSVAS
LGKLQ
LQSLQ
DRLNE
NLNES
DLQEL
common SCSs = 8
>XP_006715477.1 nesprin-1 isoform X11 [Homo sapiens]
>SarsCov2Spike_Specifiedy_by_Mizuno-san
humanProteinID = 66599 , srsCov2ProteinID = 0
RDLPQ
IAWNS
RSVAS
LGKLQ
LQSLQ
DRLNE
NLNES
DLQEL
common SCSs = 8
>XP_006715478.1 nesprin-1 isoform X13 [Homo sapiens]
>SarsCov2Spike_Specifiedy_by_Mizuno-san
humanProteinID = 66600 , srsCov2ProteinID = 0
RDLPQ
IAWNS
RSVAS
LGKLQ
LQSLQ
DRLNE
NLNES
DLQEL
common SCSs = 8
>XP_006715479.1 nesprin-1 isoform X15 [Homo sapiens]
>SarsCov2Spike_Specifiedy_by_Mizuno-san
humanProteinID = 66601 , srsCov2ProteinID = 0
RDLPQ
IAWNS
RSVAS
LGKLQ
LQSLQ
DRLNE
NLNES
DLQEL
common SCSs = 8
>XP_006715480.1 nesprin-1 isoform X16 [Homo sapiens]
>SarsCov2Spike_Specifiedy_by_Mizuno-san
humanProteinID = 66602 , srsCov2ProteinID = 0
RDLPQ
IAWNS
RSVAS
LGKLQ
LQSLQ
DRLNE
NLNES
DLQEL
common SCSs = 8
>XP_006715483.1 nesprin-1 isoform X17 [Homo sapiens]
>SarsCov2Spike_Specifiedy_by_Mizuno-san
humanProteinID = 66603 , srsCov2ProteinID = 0
RDLPQ
IAWNS
RSVAS
LGKLQ
LQSLQ
DRLNE
NLNES
DLQEL
common SCSs = 8
>XP_006715484.1 nesprin-1 isoform X19 [Homo sapiens]
>SarsCov2Spike_Specifiedy_by_Mizuno-san
humanProteinID = 66604 , srsCov2ProteinID = 0
RDLPQ
IAWNS
RSVAS
LGKLQ
LQSLQ
DRLNE
NLNES
DLQEL
common SCSs = 8
>XP_006715485.1 nesprin-1 isoform X20 [Homo sapiens]
>SarsCov2Spike_Specifiedy_by_Mizuno-san
humanProteinID = 66605 , srsCov2ProteinID = 0
RDLPQ
IAWNS
RSVAS
LGKLQ
LQSLQ
DRLNE
NLNES
DLQEL
common SCSs = 8
>XP_006715486.1 nesprin-1 isoform X22 [Homo sapiens]
>SarsCov2Spike_Specifiedy_by_Mizuno-san
humanProteinID = 66606 , srsCov2ProteinID = 0
RDLPQ
IAWNS
RSVAS
LGKLQ
LQSLQ
DRLNE
NLNES
DLQEL
common SCSs = 8
>XP_006715487.1 nesprin-1 isoform X24 [Homo sapiens]
>SarsCov2Spike_Specifiedy_by_Mizuno-san
humanProteinID = 66607 , srsCov2ProteinID = 0
RDLPQ
IAWNS
RSVAS
LGKLQ
LQSLQ
DRLNE
NLNES
DLQEL
common SCSs = 8
>XP_006715488.1 nesprin-1 isoform X26 [Homo sapiens]
>SarsCov2Spike_Specifiedy_by_Mizuno-san
humanProteinID = 66608 , srsCov2ProteinID = 0
RDLPQ
IAWNS
RSVAS
LGKLQ
LQSLQ
DRLNE
NLNES
DLQEL
common SCSs = 8
>XP_011509306.1 protein unc-80 homolog isoform X1 [Homo sapiens]
>SarsCov2Spike_Specifiedy_by_Mizuno-san
humanProteinID = 70132 , srsCov2ProteinID = 0
EPLVD
PLVDL
AGAAA
PDDFT
DDFTG
ECDIP
RRARS
LPDPS
common SCSs = 8
>XP_011509307.1 protein unc-80 homolog isoform X2 [Homo sapiens]
>SarsCov2Spike_Specifiedy_by_Mizuno-san
humanProteinID = 70133 , srsCov2ProteinID = 0
EPLVD
PLVDL
AGAAA
PDDFT
DDFTG
ECDIP
RRARS
LPDPS
common SCSs = 8
>XP_011509308.1 protein unc-80 homolog isoform X3 [Homo sapiens]
>SarsCov2Spike_Specifiedy_by_Mizuno-san
humanProteinID = 70134 , srsCov2ProteinID = 0
EPLVD
PLVDL
AGAAA
PDDFT
DDFTG
ECDIP
RRARS
LPDPS
common SCSs = 8
>XP_011509309.1 protein unc-80 homolog isoform X5 [Homo sapiens]
>SarsCov2Spike_Specifiedy_by_Mizuno-san
humanProteinID = 70135 , srsCov2ProteinID = 0
EPLVD
PLVDL
AGAAA
PDDFT
DDFTG
ECDIP
RRARS
LPDPS
common SCSs = 8
>XP_011509310.1 protein unc-80 homolog isoform X8 [Homo sapiens]
>SarsCov2Spike_Specifiedy_by_Mizuno-san
humanProteinID = 70136 , srsCov2ProteinID = 0
EPLVD
PLVDL
AGAAA
PDDFT
DDFTG
ECDIP
RRARS
LPDPS
common SCSs = 8
>XP_011530622.1 transmembrane protein KIAA1109 isoform X1 [Homo sapiens]
>SarsCov2Spike_Specifiedy_by_Mizuno-san
humanProteinID = 80350 , srsCov2ProteinID = 0
SSSGW
SSGWT
SGWTA
VLYNS
NFTIS
DSLSS
SLSST
VKLHY
common SCSs = 8
>XP_011530623.1 transmembrane protein KIAA1109 isoform X1 [Homo sapiens]
>SarsCov2Spike_Specifiedy_by_Mizuno-san
humanProteinID = 80351 , srsCov2ProteinID = 0
SSSGW
SSGWT
SGWTA
VLYNS
NFTIS
DSLSS
SLSST
VKLHY
common SCSs = 8
>XP_011530624.1 transmembrane protein KIAA1109 isoform X2 [Homo sapiens]
>SarsCov2Spike_Specifiedy_by_Mizuno-san
humanProteinID = 80352 , srsCov2ProteinID = 0
SSSGW
SSGWT
SGWTA
VLYNS
NFTIS
DSLSS
SLSST
VKLHY
common SCSs = 8
>XP_011530625.1 transmembrane protein KIAA1109 isoform X3 [Homo sapiens]
>SarsCov2Spike_Specifiedy_by_Mizuno-san
humanProteinID = 80353 , srsCov2ProteinID = 0
SSSGW
SSGWT
SGWTA
VLYNS
NFTIS
DSLSS
SLSST
VKLHY
common SCSs = 8
>XP_011530626.1 transmembrane protein KIAA1109 isoform X4 [Homo sapiens]
>SarsCov2Spike_Specifiedy_by_Mizuno-san
humanProteinID = 80354 , srsCov2ProteinID = 0
SSSGW
SSGWT
SGWTA
VLYNS
NFTIS
DSLSS
SLSST
VKLHY
common SCSs = 8
>XP_011530627.1 transmembrane protein KIAA1109 isoform X5 [Homo sapiens]
>SarsCov2Spike_Specifiedy_by_Mizuno-san
humanProteinID = 80355 , srsCov2ProteinID = 0
SSSGW
SSGWT
SGWTA
VLYNS
NFTIS
DSLSS
SLSST
VKLHY
common SCSs = 8
>XP_011530628.1 transmembrane protein KIAA1109 isoform X6 [Homo sapiens]
>SarsCov2Spike_Specifiedy_by_Mizuno-san
humanProteinID = 80356 , srsCov2ProteinID = 0
SSSGW
SSGWT
SGWTA
VLYNS
NFTIS
DSLSS
SLSST
VKLHY
common SCSs = 8
>XP_011530629.1 transmembrane protein KIAA1109 isoform X7 [Homo sapiens]
>SarsCov2Spike_Specifiedy_by_Mizuno-san
humanProteinID = 80357 , srsCov2ProteinID = 0
SSSGW
SSGWT
SGWTA
VLYNS
NFTIS
DSLSS
SLSST
VKLHY
common SCSs = 8
>XP_011530632.1 transmembrane protein KIAA1109 isoform X13 [Homo sapiens]
>SarsCov2Spike_Specifiedy_by_Mizuno-san
humanProteinID = 80358 , srsCov2ProteinID = 0
SSSGW
SSGWT
SGWTA
VLYNS
NFTIS
DSLSS
SLSST
VKLHY
common SCSs = 8
>XP_011533943.1 nesprin-1 isoform X2 [Homo sapiens]
>SarsCov2Spike_Specifiedy_by_Mizuno-san
humanProteinID = 81872 , srsCov2ProteinID = 0
RDLPQ
IAWNS
RSVAS
LGKLQ
LQSLQ
DRLNE
NLNES
DLQEL
common SCSs = 8
>XP_011533944.1 nesprin-1 isoform X4 [Homo sapiens]
>SarsCov2Spike_Specifiedy_by_Mizuno-san
humanProteinID = 81873 , srsCov2ProteinID = 0
RDLPQ
IAWNS
RSVAS
LGKLQ
LQSLQ
DRLNE
NLNES
DLQEL
common SCSs = 8
>XP_011533945.1 nesprin-1 isoform X21 [Homo sapiens]
>SarsCov2Spike_Specifiedy_by_Mizuno-san
humanProteinID = 81874 , srsCov2ProteinID = 0
RDLPQ
IAWNS
RSVAS
LGKLQ
LQSLQ
DRLNE
NLNES
DLQEL
common SCSs = 8
>XP_011533946.1 nesprin-1 isoform X29 [Homo sapiens]
>SarsCov2Spike_Specifiedy_by_Mizuno-san
humanProteinID = 81875 , srsCov2ProteinID = 0
RDLPQ
IAWNS
RSVAS
LGKLQ
LQSLQ
DRLNE
NLNES
DLQEL
common SCSs = 8
>XP_011533947.1 nesprin-1 isoform X30 [Homo sapiens]
>SarsCov2Spike_Specifiedy_by_Mizuno-san
humanProteinID = 81876 , srsCov2ProteinID = 0
RDLPQ
IAWNS
RSVAS
LGKLQ
LQSLQ
DRLNE
NLNES
DLQEL
common SCSs = 8
>XP_016859373.1 protein unc-80 homolog isoform X4 [Homo sapiens]
>SarsCov2Spike_Specifiedy_by_Mizuno-san
humanProteinID = 89547 , srsCov2ProteinID = 0
EPLVD
PLVDL
AGAAA
PDDFT
DDFTG
ECDIP
RRARS
LPDPS
common SCSs = 8
>XP_016859375.1 protein unc-80 homolog isoform X9 [Homo sapiens]
>SarsCov2Spike_Specifiedy_by_Mizuno-san
humanProteinID = 89548 , srsCov2ProteinID = 0
EPLVD
PLVDL
AGAAA
PDDFT
DDFTG
ECDIP
RRARS
LPDPS
common SCSs = 8
>XP_016859376.1 protein unc-80 homolog isoform X10 [Homo sapiens]
>SarsCov2Spike_Specifiedy_by_Mizuno-san
humanProteinID = 89549 , srsCov2ProteinID = 0
EPLVD
PLVDL
AGAAA
PDDFT
DDFTG
ECDIP
RRARS
LPDPS
common SCSs = 8
>XP_016859377.1 protein unc-80 homolog isoform X11 [Homo sapiens]
>SarsCov2Spike_Specifiedy_by_Mizuno-san
humanProteinID = 89550 , srsCov2ProteinID = 0
EPLVD
PLVDL
AGAAA
PDDFT
DDFTG
ECDIP
RRARS
LPDPS
common SCSs = 8
>XP_016859378.1 protein unc-80 homolog isoform X12 [Homo sapiens]
>SarsCov2Spike_Specifiedy_by_Mizuno-san
humanProteinID = 89551 , srsCov2ProteinID = 0
EPLVD
PLVDL
AGAAA
PDDFT
DDFTG
ECDIP
RRARS
LPDPS
common SCSs = 8
>XP_016859379.1 protein unc-80 homolog isoform X13 [Homo sapiens]
>SarsCov2Spike_Specifiedy_by_Mizuno-san
humanProteinID = 89552 , srsCov2ProteinID = 0
EPLVD
PLVDL
AGAAA
PDDFT
DDFTG
ECDIP
RRARS
LPDPS
common SCSs = 8
>XP_016859380.1 protein unc-80 homolog isoform X14 [Homo sapiens]
>SarsCov2Spike_Specifiedy_by_Mizuno-san
humanProteinID = 89553 , srsCov2ProteinID = 0
EPLVD
PLVDL
AGAAA
PDDFT
DDFTG
ECDIP
RRARS
LPDPS
common SCSs = 8
>XP_016864184.1 transmembrane protein KIAA1109 isoform X10 [Homo sapiens]
>SarsCov2Spike_Specifiedy_by_Mizuno-san
humanProteinID = 92765 , srsCov2ProteinID = 0
SSSGW
SSGWT
SGWTA
VLYNS
NFTIS
DSLSS
SLSST
VKLHY
common SCSs = 8
>XP_016864185.1 transmembrane protein KIAA1109 isoform X11 [Homo sapiens]
>SarsCov2Spike_Specifiedy_by_Mizuno-san
humanProteinID = 92766 , srsCov2ProteinID = 0
SSSGW
SSGWT
SGWTA
VLYNS
NFTIS
DSLSS
SLSST
VKLHY
common SCSs = 8
>XP_016864186.1 transmembrane protein KIAA1109 isoform X12 [Homo sapiens]
>SarsCov2Spike_Specifiedy_by_Mizuno-san
humanProteinID = 92767 , srsCov2ProteinID = 0
SSSGW
SSGWT
SGWTA
VLYNS
NFTIS
DSLSS
SLSST
VKLHY
common SCSs = 8
>XP_016866097.1 nesprin-1 isoform X1 [Homo sapiens]
>SarsCov2Spike_Specifiedy_by_Mizuno-san
humanProteinID = 94121 , srsCov2ProteinID = 0
RDLPQ
IAWNS
RSVAS
LGKLQ
LQSLQ
DRLNE
NLNES
DLQEL
common SCSs = 8
>XP_016866098.1 nesprin-1 isoform X1 [Homo sapiens]
>SarsCov2Spike_Specifiedy_by_Mizuno-san
humanProteinID = 94122 , srsCov2ProteinID = 0
RDLPQ
IAWNS
RSVAS
LGKLQ
LQSLQ
DRLNE
NLNES
DLQEL
common SCSs = 8
>XP_016866099.1 nesprin-1 isoform X5 [Homo sapiens]
>SarsCov2Spike_Specifiedy_by_Mizuno-san
humanProteinID = 94123 , srsCov2ProteinID = 0
RDLPQ
IAWNS
RSVAS
LGKLQ
LQSLQ
DRLNE
NLNES
DLQEL
common SCSs = 8
>XP_016866102.1 nesprin-1 isoform X14 [Homo sapiens]
>SarsCov2Spike_Specifiedy_by_Mizuno-san
humanProteinID = 94126 , srsCov2ProteinID = 0
RDLPQ
IAWNS
RSVAS
LGKLQ
LQSLQ
DRLNE
NLNES
DLQEL
common SCSs = 8
>XP_016866103.1 nesprin-1 isoform X18 [Homo sapiens]
>SarsCov2Spike_Specifiedy_by_Mizuno-san
humanProteinID = 94127 , srsCov2ProteinID = 0
RDLPQ
IAWNS
RSVAS
LGKLQ
LQSLQ
DRLNE
NLNES
DLQEL
common SCSs = 8
>XP_016866104.1 nesprin-1 isoform X23 [Homo sapiens]
>SarsCov2Spike_Specifiedy_by_Mizuno-san
humanProteinID = 94128 , srsCov2ProteinID = 0
RDLPQ
IAWNS
RSVAS
LGKLQ
LQSLQ
DRLNE
NLNES
DLQEL
common SCSs = 8
>XP_016866105.1 nesprin-1 isoform X25 [Homo sapiens]
>SarsCov2Spike_Specifiedy_by_Mizuno-san
humanProteinID = 94129 , srsCov2ProteinID = 0
RDLPQ
IAWNS
RSVAS
LGKLQ
LQSLQ
DRLNE
[truncated: 213,886+ more rows]

## Sheet: Sheet2
タンパク質名			タンパク質名（ホモサピ削除）	CommmonSCSs数のみ
>NP_001243779.1 titin isoform N2BA [Homo sapiens]	common SCSs = 29		>NP_001243779.1 titin isoform N2BA	29
>NP_001254479.2 titin isoform IC [Homo sapiens]	common SCSs = 29		>NP_001254479.2 titin isoform IC	29
>NP_596869.4 titin isoform N2-A [Homo sapiens]	common SCSs = 29		>NP_596869.4 titin isoform N2-A	29
>XP_016860308.1 titin isoform X1 [Homo sapiens]	common SCSs = 29		>XP_016860308.1 titin isoform X1	29
>XP_016860309.1 titin isoform X4 [Homo sapiens]	common SCSs = 29		>XP_016860309.1 titin isoform X4	29
>XP_016860310.1 titin isoform X5 [Homo sapiens]	common SCSs = 29		>XP_016860310.1 titin isoform X5	29
>XP_016860311.1 titin isoform X7 [Homo sapiens]	common SCSs = 28		>XP_016860311.1 titin isoform X7	28
>XP_024308862.1 titin isoform X2 [Homo sapiens]	common SCSs = 28		>XP_024308862.1 titin isoform X2	28
>XP_024308863.1 titin isoform X3 [Homo sapiens]	common SCSs = 28		>XP_024308863.1 titin isoform X3	28
>XP_024308864.1 titin isoform X6 [Homo sapiens]	common SCSs = 28		>XP_024308864.1 titin isoform X6	28
>XP_024308865.1 titin isoform X8 [Homo sapiens]	common SCSs = 28		>XP_024308865.1 titin isoform X8	28
>XP_024308866.1 titin isoform X9 [Homo sapiens]	common SCSs = 28		>XP_024308866.1 titin isoform X9	28
>NP_003310.4 titin isoform N2-B [Homo sapiens]	common SCSs = 25		>NP_003310.4 titin isoform N2-B	25
>NP_597676.3 titin isoform novex-1 [Homo sapiens]	common SCSs = 25		>NP_597676.3 titin isoform novex-1	25
>NP_597681.4 titin isoform novex-2 [Homo sapiens]	common SCSs = 25		>NP_597681.4 titin isoform novex-2	25
>XP_016860312.1 titin isoform X10 [Homo sapiens]	common SCSs = 25		>XP_016860312.1 titin isoform X10	25
>XP_024308867.1 titin isoform X11 [Homo sapiens]	common SCSs = 25		>XP_024308867.1 titin isoform X11	25
>XP_024308868.1 titin isoform X12 [Homo sapiens]	common SCSs = 23		>XP_024308868.1 titin isoform X12	23
>NP_078966.2 mucin-16 [Homo sapiens]	common SCSs = 21		>NP_078966.2 mucin-16	21
>XP_016882975.1 mucin-16 isoform X1 [Homo sapiens]	common SCSs = 21		>XP_016882975.1 mucin-16 isoform X1	21
>XP_016882976.1 mucin-16 isoform X2 [Homo sapiens]	common SCSs = 21		>XP_016882976.1 mucin-16 isoform X2	21
>XP_016882977.1 mucin-16 isoform X3 [Homo sapiens]	common SCSs = 21		>XP_016882977.1 mucin-16 isoform X3	21
>XP_016882978.1 mucin-16 isoform X4 [Homo sapiens]	common SCSs = 21		>XP_016882978.1 mucin-16 isoform X4	21
>XP_016882979.1 mucin-16 isoform X5 [Homo sapiens]	common SCSs = 21		>XP_016882979.1 mucin-16 isoform X5	21
>XP_016882980.1 mucin-16 isoform X6 [Homo sapiens]	common SCSs = 21		>XP_016882980.1 mucin-16 isoform X6	21
>XP_016882981.1 mucin-16 isoform X7 [Homo sapiens]	common SCSs = 21		>XP_016882981.1 mucin-16 isoform X7	21
>XP_016882982.1 mucin-16 isoform X8 [Homo sapiens]	common SCSs = 21		>XP_016882982.1 mucin-16 isoform X8	21
>XP_016882983.1 mucin-16 isoform X9 [Homo sapiens]	common SCSs = 21		>XP_016882983.1 mucin-16 isoform X9	21
>XP_016882984.1 mucin-16 isoform X10 [Homo sapiens]	common SCSs = 21		>XP_016882984.1 mucin-16 isoform X10	21
>XP_016882988.1 mucin-16 isoform X11 [Homo sapiens]	common SCSs = 15		>XP_016882988.1 mucin-16 isoform X11	15
>XP_016882989.1 mucin-16 isoform X12 [Homo sapiens]	common SCSs = 15		>XP_016882989.1 mucin-16 isoform X12	15
>NP_115495.3 adhesion G-protein coupled receptor V1 precursor [Homo sapiens]	common SCSs = 10		>NP_115495.3 adhesion G-protein coupled receptor V1 precursor	10
>XP_016865452.1 adhesion G-protein coupled receptor V1 isoform X1 [Homo sapiens]	common SCSs = 10		>XP_016865452.1 adhesion G-protein coupled receptor V1 isoform X1	10
>XP_016865453.1 adhesion G-protein coupled receptor V1 isoform X2 [Homo sapiens]	common SCSs = 10		>XP_016865453.1 adhesion G-protein coupled receptor V1 isoform X2	10
>XP_016865454.1 adhesion G-protein coupled receptor V1 isoform X3 [Homo sapiens]	common SCSs = 10		>XP_016865454.1 adhesion G-protein coupled receptor V1 isoform X3	10
>XP_016865455.1 adhesion G-protein coupled receptor V1 isoform X4 [Homo sapiens]	common SCSs = 10		>XP_016865455.1 adhesion G-protein coupled receptor V1 isoform X4	10
>XP_016865456.1 adhesion G-protein coupled receptor V1 isoform X5 [Homo sapiens]	common SCSs = 10		>XP_016865456.1 adhesion G-protein coupled receptor V1 isoform X5	10
>XP_016865457.1 adhesion G-protein coupled receptor V1 isoform X6 [Homo sapiens]	common SCSs = 10		>XP_016865457.1 adhesion G-protein coupled receptor V1 isoform X6	10
>XP_016865458.1 adhesion G-protein coupled receptor V1 isoform X7 [Homo sapiens]	common SCSs = 10		>XP_016865458.1 adhesion G-protein coupled receptor V1 isoform X7	9
>NP_001027.3 ryanodine receptor 3 isoform 1 [Homo sapiens]	common SCSs = 9		>NP_001027.3 ryanodine receptor 3 isoform 1	9
>NP_001230925.1 ryanodine receptor 3 isoform 2 [Homo sapiens]	common SCSs = 9		>NP_001230925.1 ryanodine receptor 3 isoform 2	9
>XP_011520182.1 ryanodine receptor 3 isoform X9 [Homo sapiens]	common SCSs = 9		>XP_011520182.1 ryanodine receptor 3 isoform X9	9
>XP_016865459.1 adhesion G-protein coupled receptor V1 isoform X8 [Homo sapiens]	common SCSs = 9		>XP_016865459.1 adhesion G-protein coupled receptor V1 isoform X8	9
>XP_016865460.1 adhesion G-protein coupled receptor V1 isoform X9 [Homo sapiens]	common SCSs = 9		>XP_016865460.1 adhesion G-protein coupled receptor V1 isoform X9	9
>XP_016866100.1 nesprin-1 isoform X9 [Homo sapiens]	common SCSs = 9		>XP_016866100.1 nesprin-1 isoform X9	9
>XP_016866101.1 nesprin-1 isoform X12 [Homo sapiens]	common SCSs = 9		>XP_016866101.1 nesprin-1 isoform X12	9
>XP_016877957.1 ryanodine receptor 3 isoform X1 [Homo sapiens]	common SCSs = 9		>XP_016877957.1 ryanodine receptor 3 isoform X1	9
>XP_016877958.1 ryanodine receptor 3 isoform X2 [Homo sapiens]	common SCSs = 9		>XP_016877958.1 ryanodine receptor 3 isoform X2	9
>XP_016877959.1 ryanodine receptor 3 isoform X3 [Homo sapiens]	common SCSs = 9		>XP_016877959.1 ryanodine receptor 3 isoform X3	9
>XP_016877960.1 ryanodine receptor 3 isoform X4 [Homo sapiens]	common SCSs = 9		>XP_016877960.1 ryanodine receptor 3 isoform X4	9
>XP_016877961.1 ryanodine receptor 3 isoform X5 [Homo sapiens]	common SCSs = 9		>XP_016877961.1 ryanodine receptor 3 isoform X5	9
>XP_016877962.1 ryanodine receptor 3 isoform X7 [Homo sapiens]	common SCSs = 9		>XP_016877962.1 ryanodine receptor 3 isoform X7	9
>XP_016877963.1 ryanodine receptor 3 isoform X8 [Homo sapiens]	common SCSs = 9		>XP_016877963.1 ryanodine receptor 3 isoform X8	9
>XP_016877964.1 ryanodine receptor 3 isoform X10 [Homo sapiens]	common SCSs = 9		>XP_016877964.1 ryanodine receptor 3 isoform X10	9
>XP_016877965.1 ryanodine receptor 3 isoform X11 [Homo sapiens]	common SCSs = 9		>XP_016877965.1 ryanodine receptor 3 isoform X11	9
>XP_016877966.1 ryanodine receptor 3 isoform X12 [Homo sapiens]	common SCSs = 9		>XP_016877966.1 ryanodine receptor 3 isoform X12	9
>XP_024305783.1 ryanodine receptor 3 isoform X6 [Homo sapiens]	common SCSs = 9		>XP_024305783.1 ryanodine receptor 3 isoform X6	9
>XP_024305784.1 ryanodine receptor 3 isoform X13 [Homo sapiens]	common SCSs = 9		>XP_024305784.1 ryanodine receptor 3 isoform X13	9
>NP_001358915.1 protein unc-80 homolog isoform 3 [Homo sapiens]	common SCSs = 8		>NP_001358915.1 protein unc-80 homolog isoform 3	8
>NP_001371054.1 transmembrane protein KIAA1109 isoform [Homo sapiens]	common SCSs = 8		>NP_001371054.1 transmembrane protein KIAA1109 isoform	8
>NP_056127.2 transmembrane protein KIAA1109 isoform 2 [Homo sapiens]	common SCSs = 8		>NP_056127.2 transmembrane protein KIAA1109 isoform 2	8
>NP_115893.1 protein unc-80 homolog isoform 1 [Homo sapiens]	common SCSs = 8		>NP_115893.1 protein unc-80 homolog isoform 1	8
>NP_149062.2 nesprin-1 isoform 2 [Homo sapiens]	common SCSs = 8		>NP_149062.2 nesprin-1 isoform 2	8
>NP_872393.3 protein unc-80 homolog isoform 2 [Homo sapiens]	common SCSs = 8		>NP_872393.3 protein unc-80 homolog isoform 2	8
>NP_892006.3 nesprin-1 isoform 1 (nesprin-1 giant or enaptin) [Homo sapiens]	common SCSs = 8		>NP_892006.3 nesprin-1 isoform 1 (nesprin-1 giant or enaptin)	8
>XP_005246533.1 protein unc-80 homolog isoform X7 [Homo sapiens]	common SCSs = 8		>XP_005246533.1 protein unc-80 homolog isoform X7	8
>XP_005263339.1 transmembrane protein KIAA1109 isoform X8 [Homo sapiens]	common SCSs = 8		>XP_005263339.1 transmembrane protein KIAA1109 isoform X8	8
>XP_005263344.1 transmembrane protein KIAA1109 isoform X9 [Homo sapiens]	common SCSs = 8		>XP_005263344.1 transmembrane protein KIAA1109 isoform X9	8
>XP_006714407.1 transmembrane protein KIAA1109 isoform X17 [Homo sapiens]	common SCSs = 8		>XP_006714407.1 transmembrane protein KIAA1109 isoform X17	8
>XP_006715470.1 nesprin-1 isoform X1 [Homo sapiens]	common SCSs = 8		>XP_006715470.1 nesprin-1 isoform X1	8
>XP_006715471.1 nesprin-1 isoform X3 [Homo sapiens]	common SCSs = 8		>XP_006715471.1 nesprin-1 isoform X3	8
>XP_006715472.1 nesprin-1 isoform X5 [Homo sapiens]	common SCSs = 8		>XP_006715472.1 nesprin-1 isoform X5	8
>XP_006715473.1 nesprin-1 isoform X6 [Homo sapiens]	common SCSs = 8		>XP_006715473.1 nesprin-1 isoform X6	8
>XP_006715474.1 nesprin-1 isoform X7 [Homo sapiens]	common SCSs = 8		>XP_006715474.1 nesprin-1 isoform X7	8
>XP_006715475.1 nesprin-1 isoform X8 [Homo sapiens]	common SCSs = 8		>XP_006715475.1 nesprin-1 isoform X8	8
>XP_006715476.1 nesprin-1 isoform X10 [Homo sapiens]	common SCSs = 8		>XP_006715476.1 nesprin-1 isoform X10	8
>XP_006715477.1 nesprin-1 isoform X11 [Homo sapiens]	common SCSs = 8		>XP_006715477.1 nesprin-1 isoform X11	8
>XP_006715478.1 nesprin-1 isoform X13 [Homo sapiens]	common SCSs = 8		>XP_006715478.1 nesprin-1 isoform X13	8
>XP_006715479.1 nesprin-1 isoform X15 [Homo sapiens]	common SCSs = 8		>XP_006715479.1 nesprin-1 isoform X15	8
>XP_006715480.1 nesprin-1 isoform X16 [Homo sapiens]	common SCSs = 8		>XP_006715480.1 nesprin-1 isoform X16	8
>XP_006715483.1 nesprin-1 isoform X17 [Homo sapiens]	common SCSs = 8		>XP_006715483.1 nesprin-1 isoform X17	8
>XP_006715484.1 nesprin-1 isoform X19 [Homo sapiens]	common SCSs = 8		>XP_006715484.1 nesprin-1 isoform X19	8
>XP_006715485.1 nesprin-1 isoform X20 [Homo sapiens]	common SCSs = 8		>XP_006715485.1 nesprin-1 isoform X20	8
>XP_006715486.1 nesprin-1 isoform X22 [Homo sapiens]	common SCSs = 8		>XP_006715486.1 nesprin-1 isoform X22	8
>XP_006715487.1 nesprin-1 isoform X24 [Homo sapiens]	common SCSs = 8		>XP_006715487.1 nesprin-1 isoform X24	8
>XP_006715488.1 nesprin-1 isoform X26 [Homo sapiens]	common SCSs = 8		>XP_006715488.1 nesprin-1 isoform X26	8
>XP_011509306.1 protein unc-80 homolog isoform X1 [Homo sapiens]	common SCSs = 8		>XP_011509306.1 protein unc-80 homolog isoform X1	8
>XP_011509307.1 protein unc-80 homolog isoform X2 [Homo sapiens]	common SCSs = 8		>XP_011509307.1 protein unc-80 homolog isoform X2	8
>XP_011509308.1 protein unc-80 homolog isoform X3 [Homo sapiens]	common SCSs = 8		>XP_011509308.1 protein unc-80 homolog isoform X3	8
>XP_011509309.1 protein unc-80 homolog isoform X5 [Homo sapiens]	common SCSs = 8		>XP_011509309.1 protein unc-80 homolog isoform X5	8
>XP_011509310.1 protein unc-80 homolog isoform X8 [Homo sapiens]	common SCSs = 8		>XP_011509310.1 protein unc-80 homolog isoform X8	8
>XP_011530622.1 transmembrane protein KIAA1109 isoform X1 [Homo sapiens]	common SCSs = 8		>XP_011530622.1 transmembrane protein KIAA1109 isoform X1	8
>XP_011530623.1 transmembrane protein KIAA1109 isoform X1 [Homo sapiens]	common SCSs = 8		>XP_011530623.1 transmembrane protein KIAA1109 isoform X1	8
>XP_011530624.1 transmembrane protein KIAA1109 isoform X2 [Homo sapiens]	common SCSs = 8		>XP_011530624.1 transmembrane protein KIAA1109 isoform X2	8
>XP_011530625.1 transmembrane protein KIAA1109 isoform X3 [Homo sapiens]	common SCSs = 8		>XP_011530625.1 transmembrane protein KIAA1109 isoform X3	8
>XP_011530626.1 transmembrane protein KIAA1109 isoform X4 [Homo sapiens]	common SCSs = 8		>XP_011530626.1 transmembrane protein KIAA1109 isoform X4	8
>XP_011530627.1 transmembrane protein KIAA1109 isoform X5 [Homo sapiens]	common SCSs = 8		>XP_011530627.1 transmembrane protein KIAA1109 isoform X5	8
>XP_011530628.1 transmembrane protein KIAA1109 isoform X6 [Homo sapiens]	common SCSs = 8		>XP_011530628.1 transmembrane protein KIAA1109 isoform X6	8
>XP_011530629.1 transmembrane protein KIAA1109 isoform X7 [Homo sapiens]	common SCSs = 8		>XP_011530629.1 transmembrane protein KIAA1109 isoform X7	8
>XP_011530632.1 transmembrane protein KIAA1109 isoform X13 [Homo sapiens]	common SCSs = 8		>XP_011530632.1 transmembrane protein KIAA1109 isoform X13	8
>XP_011533943.1 nesprin-1 isoform X2 [Homo sapiens]	common SCSs = 8		>XP_011533943.1 nesprin-1 isoform X2	8
>XP_011533944.1 nesprin-1 isoform X4 [Homo sapiens]	common SCSs = 8		>XP_011533944.1 nesprin-1 isoform X4	8
>XP_011533945.1 nesprin-1 isoform X21 [Homo sapiens]	common SCSs = 8		>XP_011533945.1 nesprin-1 isoform X21	8
>XP_011533946.1 nesprin-1 isoform X29 [Homo sapiens]	common SCSs = 8		>XP_011533946.1 nesprin-1 isoform X29	8
>XP_011533947.1 nesprin-1 isoform X30 [Homo sapiens]	common SCSs = 8		>XP_011533947.1 nesprin-1 isoform X30	8
>XP_016859373.1 protein unc-80 homolog isoform X4 [Homo sapiens]	common SCSs = 8		>XP_016859373.1 protein unc-80 homolog isoform X4	8
>XP_016859375.1 protein unc-80 homolog isoform X9 [Homo sapiens]	common SCSs = 8		>XP_016859375.1 protein unc-80 homolog isoform X9	8
>XP_016859376.1 protein unc-80 homolog isoform X10 [Homo sapiens]	common SCSs = 8		>XP_016859376.1 protein unc-80 homolog isoform X10	8
>XP_016859377.1 protein unc-80 homolog isoform X11 [Homo sapiens]	common SCSs = 8		>XP_016859377.1 protein unc-80 homolog isoform X11	8
>XP_016859378.1 protein unc-80 homolog isoform X12 [Homo sapiens]	common SCSs = 8		>XP_016859378.1 protein unc-80 homolog isoform X12	8
>XP_016859379.1 protein unc-80 homolog isoform X13 [Homo sapiens]	common SCSs = 8		>XP_016859379.1 protein unc-80 homolog isoform X13	8
>XP_016859380.1 protein unc-80 homolog isoform X14 [Homo sapiens]	common SCSs = 8		>XP_016859380.1 protein unc-80 homolog isoform X14	8
>XP_016864184.1 transmembrane protein KIAA1109 isoform X10 [Homo sapiens]	common SCSs = 8		>XP_016864184.1 transmembrane protein KIAA1109 isoform X10	8
>XP_016864185.1 transmembrane protein KIAA1109 isoform X11 [Homo sapiens]	common SCSs = 8		>XP_016864185.1 transmembrane protein KIAA1109 isoform X11	8
>XP_016864186.1 transmembrane protein KIAA1109 isoform X12 [Homo sapiens]	common SCSs = 8		>XP_016864186.1 transmembrane protein KIAA1109 isoform X12	8
>XP_016866097.1 nesprin-1 isoform X1 [Homo sapiens]	common SCSs = 8		>XP_016866097.1 nesprin-1 isoform X1	8
>XP_016866098.1 nesprin-1 isoform X1 [Homo sapiens]	common SCSs = 8		>XP_016866098.1 nesprin-1 isoform X1	8
>XP_016866099.1 nesprin-1 isoform X5 [Homo sapiens]	common SCSs = 8		>XP_016866099.1 nesprin-1 isoform X5	8
>XP_016866102.1 nesprin-1 isoform X14 [Homo sapiens]	common SCSs = 8		>XP_016866102.1 nesprin-1 isoform X14	8
>XP_016866103.1 nesprin-1 isoform X18 [Homo sapiens]	common SCSs = 8		>XP_016866103.1 nesprin-1 isoform X18	8
>XP_016866104.1 nesprin-1 isoform X23 [Homo sapiens]	common SCSs = 8		>XP_016866104.1 nesprin-1 isoform X23	8
>XP_016866105.1 nesprin-1 isoform X25 [Homo sapiens]	common SCSs = 8		>XP_016866105.1 nesprin-1 isoform X25	8
>XP_016866106.1 nesprin-1 isoform X27 [Homo sapiens]	common SCSs = 8		>XP_016866106.1 nesprin-1 isoform X27	8
>XP_016866107.1 nesprin-1 isoform X28 [Homo sapiens]	common SCSs = 8		>XP_016866107.1 nesprin-1 isoform X28	8
>XP_016866108.1 nesprin-1 isoform X29 [Homo sapiens]	common SCSs = 8		>XP_016866108.1 nesprin-1 isoform X29	8
>XP_024310011.1 transmembrane protein KIAA1109 isoform X14 [Homo sapiens]	common SCSs = 8		>XP_024310011.1 transmembrane protein KIAA1109 isoform X14	8
>NP_001077422.1 thyroid adenoma-associated protein isoform a [Homo sapiens]	common SCSs = 7		>NP_001077422.1 thyroid adenoma-associated protein isoform a	7
>NP_001185879.1 unconventional myosin-XVI isoform 1 [Homo sapiens]	common SCSs = 7		>NP_001185879.1 unconventional myosin-XVI isoform 1	7
>NP_001332852.1 thyroid adenoma-associated protein isoform d [Homo sapiens]	common SCSs = 7		>NP_001332852.1 thyroid adenoma-associated protein isoform d	7
>NP_001332854.1 thyroid adenoma-associated protein isoform a [Homo sapiens]	common SCSs = 7		>NP_001332854.1 thyroid adenoma-associated protein isoform a	7
>NP_001367.2 cytoplasmic dynein 1 heavy chain 1 [Homo sapiens]	common SCSs = 7		>NP_001367.2 cytoplasmic dynein 1 heavy chain 1	7
>NP_002214.2 inositol 1,4,5-trisphosphate receptor type 2 [Homo sapiens]	common SCSs = 7		>NP_002214.2 inositol 1,4,5-trisphosphate receptor type 2	7
>NP_055826.1 unconventional myosin-XVI isoform 2 [Homo sapiens]	common SCSs = 7		>NP_055826.1 unconventional myosin-XVI isoform 2	7
>NP_071348.3 thyroid adenoma-associated protein isoform a [Homo sapiens]	common SCSs = 7		>NP_071348.3 thyroid adenoma-associated protein isoform a	7
>NP_733751.2 histone-lysine N-methyltransferase 2C [Homo sapiens]	common SCSs = 7		>NP_733751.2 histone-lysine N-methyltransferase 2C	7
>NP_775871.2 mucin-19 precursor [Homo sapiens]	common SCSs = 7		>NP_775871.2 mucin-19 precursor	7
>XP_005250082.1 histone-lysine N-methyltransferase 2C isoform X1 [Homo sapiens]	common SCSs = 7		>XP_005250082.1 histone-lysine N-methyltransferase 2C isoform X1	7
>XP_005250083.1 histone-lysine N-methyltransferase 2C isoform X2 [Homo sapiens]	common SCSs = 7		>XP_005250083.1 histone-lysine N-methyltransferase 2C isoform X2	7
>XP_005250084.1 histone-lysine N-methyltransferase 2C isoform X3 [Homo sapiens]	common SCSs = 7		>XP_005250084.1 histone-lysine N-methyltransferase 2C isoform X3	7
>XP_005250085.1 histone-lysine N-methyltransferase 2C isoform X6 [Homo sapiens]	common SCSs = 7		>XP_005250085.1 histone-lysine N-methyltransferase 2C isoform X6	7
>XP_005250088.1 histone-lysine N-methyltransferase 2C isoform X18 [Homo sapiens]	common SCSs = 7		>XP_005250088.1 histone-lysine N-methyltransferase 2C isoform X18	7
>XP_006712127.1 thyroid adenoma-associated protein isoform X2 [Homo sapiens]	common SCSs = 7		>XP_006712127.1 thyroid adenoma-associated protein isoform X2	7
>XP_006712128.1 thyroid adenoma-associated protein isoform X3 [Homo sapiens]	common SCSs = 7		>XP_006712128.1 thyroid adenoma-associated protein isoform X3	7
>XP_006712131.1 thyroid adenoma-associated protein isoform X6 [Homo sapiens]	common SCSs = 7		>XP_006712131.1 thyroid adenoma-associated protein isoform X6	7
>XP_006716140.1 histone-lysine N-methyltransferase 2C isoform X4 [Homo sapiens]	common SCSs = 7		>XP_006716140.1 histone-lysine N-methyltransferase 2C isoform X4	7
>XP_006716141.1 histone-lysine N-methyltransferase 2C isoform X12 [Homo sapiens]	common SCSs = 7		>XP_006716141.1 histone-lysine N-methyltransferase 2C isoform X12	7
>XP_006716142.1 histone-lysine N-methyltransferase 2C isoform X19 [Homo sapiens]	common SCSs = 7		>XP_006716142.1 histone-lysine N-methyltransferase 2C isoform X19	7
>XP_011514752.1 histone-lysine N-methyltransferase 2C isoform X10 [Homo sapiens]	common SCSs = 7		>XP_011514752.1 histone-lysine N-methyltransferase 2C isoform X10	7
>XP_011514753.1 histone-lysine N-methyltransferase 2C isoform X15 [Homo sapiens]	common SCSs = 7		>XP_011514753.1 histone-lysine N-methyltransferase 2C isoform X15	7
>XP_011514754.1 histone-lysine N-methyltransferase 2C isoform X17 [Homo sapiens]	common SCSs = 7		>XP_011514754.1 histone-lysine N-methyltransferase 2C isoform X17	7
>XP_011514755.1 histone-lysine N-methyltransferase 2C isoform X21 [Homo sapiens]	common SCSs = 7		>XP_011514755.1 histone-lysine N-methyltransferase 2C isoform X21	7
>XP_011514756.1 histone-lysine N-methyltransferase 2C isoform X22 [Homo sapiens]	common SCSs = 7		>XP_011514756.1 histone-lysine N-methyltransferase 2C isoform X22	7
>XP_011514758.1 histone-lysine N-methyltransferase 2C isoform X25 [Homo sapiens]	common SCSs = 7		>XP_011514758.1 histone-lysine N-methyltransferase 2C isoform X25	7
>XP_011519364.1 unconventional myosin-XVI isoform X1 [Homo sapiens]	common SCSs = 7		>XP_011519364.1 unconventional myosin-XVI isoform X1	7
>XP_011531317.1 thyroid adenoma-associated protein isoform X7 [Homo sapiens]	common SCSs = 7		>XP_011531317.1 thyroid adenoma-associated protein isoform X7	7
>XP_016859381.1 protein unc-80 homolog isoform X16 [Homo sapiens]	common SCSs = 7		>XP_016859381.1 protein unc-80 homolog isoform X16	7
>XP_016865461.1 adhesion G-protein coupled receptor V1 isoform X10 [Homo sapiens]	common SCSs = 7		>XP_016865461.1 adhesion G-protein coupled receptor V1 isoform X10	7
>XP_016865462.1 adhesion G-protein coupled receptor V1 isoform X11 [Homo sapiens]	common SCSs = 7		>XP_016865462.1 adhesion G-protein coupled receptor V1 isoform X11	7
>XP_016867969.1 histone-lysine N-methyltransferase 2C isoform X1 [Homo sapiens]	common SCSs = 7		>XP_016867969.1 histone-lysine N-methyltransferase 2C isoform X1	7
>XP_016867970.1 histone-lysine N-methyltransferase 2C isoform X2 [Homo sapiens]	common SCSs = 7		>XP_016867970.1 histone-lysine N-methyltransferase 2C isoform X2	7
>XP_016867971.1 histone-lysine N-methyltransferase 2C isoform X7 [Homo sapiens]	common SCSs = 7		>XP_016867971.1 histone-lysine N-methyltransferase 2C isoform X7	7
>XP_016867972.1 histone-lysine N-methyltransferase 2C isoform X8 [Homo sapiens]	common SCSs = 7		>XP_016867972.1 histone-lysine N-methyltransferase 2C isoform X8	7
>XP_016867973.1 histone-lysine N-methyltransferase 2C isoform X9 [Homo sapiens]	common SCSs = 7		>XP_016867973.1 histone-lysine N-methyltransferase 2C isoform X9	7
>XP_016867974.1 histone-lysine N-methyltransferase 2C isoform X11 [Homo sapiens]	common SCSs = 7		>XP_016867974.1 histone-lysine N-methyltransferase 2C isoform X11	7
>XP_016867975.1 histone-lysine N-methyltransferase 2C isoform X14 [Homo sapiens]	common SCSs = 7		>XP_016867975.1 histone-lysine N-methyltransferase 2C isoform X14	7
>XP_016867976.1 histone-lysine N-methyltransferase 2C isoform X16 [Homo sapiens]	common SCSs = 7		>XP_016867976.1 histone-lysine N-methyltransferase 2C isoform X16	7
>XP_016867977.1 histone-lysine N-methyltransferase 2C isoform X20 [Homo sapiens]	common SCSs = 7		>XP_016867977.1 histone-lysine N-methyltransferase 2C isoform X20	7
>XP_016874755.1 inositol 1,4,5-trisphosphate receptor type 2 isoform X1 [Homo sapiens]	common SCSs = 7		>XP_016874755.1 inositol 1,4,5-trisphosphate receptor type 2 isoform X1	7
>XP_016874756.1 inositol 1,4,5-trisphosphate receptor type 2 isoform X2 [Homo sapiens]	common SCSs = 7		>XP_016874756.1 inositol 1,4,5-trisphosphate receptor type 2 isoform X2	7
>XP_024302620.1 histone-lysine N-methyltransferase 2C isoform X5 [Homo sapiens]	common SCSs = 7		>XP_024302620.1 histone-lysine N-methyltransferase 2C isoform X5	7
>XP_024302621.1 histone-lysine N-methyltransferase 2C isoform X13 [Homo sapiens]	common SCSs = 7		>XP_024302621.1 histone-lysine N-methyltransferase 2C isoform X13	7
>NP_000531.2 ryanodine receptor 1 isoform 1 [Homo sapiens]	common SCSs = 6		>NP_000531.2 ryanodine receptor 1 isoform 1	6
>NP_001026.2 ryanodine receptor 2 [Homo sapiens]	common SCSs = 6		>NP_001026.2 ryanodine receptor 2	6
>NP_001036188.1 ryanodine receptor 1 isoform 2 [Homo sapiens]	common SCSs = 6		>NP_001036188.1 ryanodine receptor 1 isoform 2	6
>NP_001180394.1 KAT8 regulatory NSL complex subunit 1 isoform 2 [Homo sapiens]	common SCSs = 6		>NP_001180394.1 KAT8 regulatory NSL complex subunit 1 isoform 2	6
>NP_001180395.1 KAT8 regulatory NSL complex subunit 1 isoform 1 [Homo sapiens]	common SCSs = 6		>NP_001180395.1 KAT8 regulatory NSL complex subunit 1 isoform 1	6
>NP_001278214.1 protocadherin Fat 4 isoform 2 precursor [Homo sapiens]	common SCSs = 6		>NP_001278214.1 protocadherin Fat 4 isoform 2 precursor	6
>NP_001278232.1 protocadherin Fat 4 isoform 1 precursor [Homo sapiens]	common SCSs = 6		>NP_001278232.1 protocadherin Fat 4 isoform 1 precursor	6
>NP_001278789.1 basement membrane-specific heparan sulfate proteoglycan core protein isoform a precursor [Homo sapiens]	common SCSs = 6		>NP_001278789.1 basement membrane-specific heparan sulfate proteoglycan core protein isoform a precursor	6
>NP_001333694.1 unconventional myosin-XVIIIa isoform c [Homo sapiens]	common SCSs = 6		>NP_001333694.1 unconventional myosin-XVIIIa isoform c	6
>NP_001333695.1 unconventional myosin-XVIIIa isoform d [Homo sapiens]	common SCSs = 6		>NP_001333695.1 unconventional myosin-XVIIIa isoform d	6
>NP_001333696.1 unconventional myosin-XVIIIa isoform e [Homo sapiens]	common SCSs = 6		>NP_001333696.1 unconventional myosin-XVIIIa isoform e	6
>NP_001366127.1 KAT8 regulatory NSL complex subunit 1 isoform 1 [Homo sapiens]	common SCSs = 6		>NP_001366127.1 KAT8 regulatory NSL complex subunit 1 isoform 1	6
>NP_002102.4 huntingtin [Homo sapiens]	common SCSs = 6		>NP_002102.4 huntingtin	6
>NP_004645.2 probable ubiquitin carboxyl-terminal hydrolase FAF-Y [Homo sapiens]	common SCSs = 6		>NP_004645.2 probable ubiquitin carboxyl-terminal hydrolase FAF-Y	6
>NP_005520.4 basement membrane-specific heparan sulfate proteoglycan core protein isoform b precursor [Homo sapiens]	common SCSs = 6		>NP_005520.4 basement membrane-specific heparan sulfate proteoglycan core protein isoform b precursor	6
>NP_006653.2 helicase SRCAP [Homo sapiens]	common SCSs = 6		>NP_006653.2 helicase SRCAP	6
>NP_008816.3 zinc finger homeobox protein 3 isoform A [Homo sapiens]	common SCSs = 6		>NP_008816.3 zinc finger homeobox protein 3 isoform A	6
>NP_055995.4 nesprin-2 isoform 1 [Homo sapiens]	common SCSs = 6		>NP_055995.4 nesprin-2 isoform 1	6
>NP_056258.1 KAT8 regulatory NSL complex subunit 1 isoform 1 [Homo sapiens]	common SCSs = 6		>NP_056258.1 KAT8 regulatory NSL complex subunit 1 isoform 1	6
>NP_060639.4 retroelement silencing factor 1 [Homo sapiens]	common SCSs = 6		>NP_060639.4 retroelement silencing factor 1	6
>NP_078858.4 protocadherin Fat 4 isoform 3 precursor [Homo sapiens]	common SCSs = 6		>NP_078858.4 protocadherin Fat 4 isoform 3 precursor	6
>NP_113584.3 E3 ubiquitin-protein ligase HUWE1 [Homo sapiens]	common SCSs = 6		>NP_113584.3 E3 ubiquitin-protein ligase HUWE1	6
>NP_510880.2 unconventional myosin-XVIIIa isoform a [Homo sapiens]	common SCSs = 6		>NP_510880.2 unconventional myosin-XVIIIa isoform a	6
>NP_775922.3 fibrous sheath-interacting protein 2 [Homo sapiens]	common SCSs = 6		>NP_775922.3 fibrous sheath-interacting protein 2	6
>NP_849172.2 NLR family CARD domain-containing protein 3 [Homo sapiens]	common SCSs = 6		>NP_849172.2 NLR family CARD domain-containing protein 3	6
>NP_878918.2 nesprin-2 isoform 5 [Homo sapiens]	common SCSs = 6		>NP_878918.2 nesprin-2 isoform 5	6
>NP_976063.1 unconventional myosin-XVIIIa isoform b [Homo sapiens]	common SCSs = 6		>NP_976063.1 unconventional myosin-XVIIIa isoform b	6
>XP_005253462.1 retroelement silencing factor 1 isoform X1 [Homo sapiens]	common SCSs = 6		>XP_005253462.1 retroelement silencing factor 1 isoform X1	6
>XP_005256014.1 zinc finger homeobox protein 3 isoform X1 [Homo sapiens]	common SCSs = 6		>XP_005256014.1 zinc finger homeobox protein 3 isoform X1	6
>XP_005262022.1 E3 ubiquitin-protein ligase HUWE1 isoform X11 [Homo sapiens]	common SCSs = 6		>XP_005262022.1 E3 ubiquitin-protein ligase HUWE1 isoform X11	6
>XP_005267511.1 nesprin-2 isoform X3 [Homo sapiens]	common SCSs = 6		>XP_005267511.1 nesprin-2 isoform X3	6
>XP_005267513.1 nesprin-2 isoform X5 [Homo sapiens]	common SCSs = 6		>XP_005267513.1 nesprin-2 isoform X5	6
>XP_005267514.1 nesprin-2 isoform X9 [Homo sapiens]	common SCSs = 6		>XP_005267514.1 nesprin-2 isoform X9	6
>XP_005267515.1 nesprin-2 isoform X10 [Homo sapiens]	common SCSs = 6		>XP_005267515.1 nesprin-2 isoform X10	6
>XP_005267516.1 nesprin-2 isoform X12 [Homo sapiens]	common SCSs = 6		>XP_005267516.1 nesprin-2 isoform X12	6
>XP_006711865.1 ryanodine receptor 2 isoform X1 [Homo sapiens]	common SCSs = 6		>XP_006711865.1 ryanodine receptor 2 isoform X1	6
>XP_006711866.1 ryanodine receptor 2 isoform X2 [Homo sapiens]	common SCSs = 6		>XP_006711866.1 ryanodine receptor 2 isoform X2	6
>XP_006711867.1 ryanodine receptor 2 isoform X4 [Homo sapiens]	common SCSs = 6		>XP_006711867.1 ryanodine receptor 2 isoform X4	6
>XP_006711868.1 ryanodine receptor 2 isoform X5 [Homo sapiens]	common SCSs = 6		>XP_006711868.1 ryanodine receptor 2 isoform X5	6
>XP_006711869.1 ryanodine receptor 2 isoform X6 [Homo sapiens]	common SCSs = 6		>XP_006711869.1 ryanodine receptor 2 isoform X6	6
>XP_006711870.1 ryanodine receptor 2 isoform X7 [Homo sapiens]	common SCSs = 6		>XP_006711870.1 ryanodine receptor 2 isoform X7	6
>XP_006711873.1 ryanodine receptor 2 isoform X9 [Homo sapiens]	common SCSs = 6		>XP_006711873.1 ryanodine receptor 2 isoform X9	6
>XP_006712129.1 thyroid adenoma-associated protein isoform X4 [Homo sapiens]	common SCSs = 6		>XP_006712129.1 thyroid adenoma-associated protein isoform X4	6
>XP_006712130.1 thyroid adenoma-associated protein isoform X5 [Homo sapiens]	common SCSs = 6		>XP_006712130.1 thyroid adenoma-associated protein isoform X5	6
>XP_006721887.1 KAT8 regulatory NSL complex subunit 1 isoform X1 [Homo sapiens]	common SCSs = 6		>XP_006721887.1 KAT8 regulatory NSL complex subunit 1 isoform X1	6
>XP_006723380.1 ryanodine receptor 1 isoform X1 [Homo sapiens]	common SCSs = 6		>XP_006723380.1 ryanodine receptor 1 isoform X1	6
>XP_006723382.1 ryanodine receptor 1 isoform X2 [Homo sapiens]	common SCSs = 6		>XP_006723382.1 ryanodine receptor 1 isoform X2	6
>XP_011509312.1 protein unc-80 homolog isoform X15 [Homo sapiens]	common SCSs = 6		>XP_011509312.1 protein unc-80 homolog isoform X15	6
>XP_011519024.1 retroelement silencing factor 1 isoform X1 [Homo sapiens]	common SCSs = 6		>XP_011519024.1 retroelement silencing factor 1 isoform X1	6
>XP_011522930.1 KAT8 regulatory NSL complex subunit 1 isoform X2 [Homo sapiens]	common SCSs = 6		>XP_011522930.1 KAT8 regulatory NSL complex subunit 1 isoform X2	6
>XP_011522932.1 KAT8 regulatory NSL complex subunit 1 isoform X4 [Homo sapiens]	common SCSs = 6		>XP_011522932.1 KAT8 regulatory NSL complex subunit 1 isoform X4	6
>XP_011522933.1 KAT8 regulatory NSL complex subunit 1 isoform X5 [Homo sapiens]	common SCSs = 6		>XP_011522933.1 KAT8 regulatory NSL complex subunit 1 isoform X5	6
>XP_011525507.1 ryanodine receptor 1 isoform X3 [Homo sapiens]	common SCSs = 6		>XP_011525507.1 ryanodine receptor 1 isoform X3	6
>XP_011529049.1 E3 ubiquitin-protein ligase HUWE1 isoform X9 [Homo sapiens]	common SCSs = 6		>XP_011529049.1 E3 ubiquitin-protein ligase HUWE1 isoform X9	6
>XP_011529053.1 E3 ubiquitin-protein ligase HUWE1 isoform X9 [Homo sapiens]	common SCSs = 6		>XP_011529053.1 E3 ubiquitin-protein ligase HUWE1 isoform X9	6
>XP_011534876.1 nesprin-2 isoform X1 [Homo sapiens]	common SCSs = 6		>XP_011534876.1 nesprin-2 isoform X1	6
>XP_011534877.1 nesprin-2 isoform X1 [Homo sapiens]	common SCSs = 6		>XP_011534877.1 nesprin-2 isoform X1	6
>XP_011534878.1 nesprin-2 isoform X1 [Homo sapiens]	common SCSs = 6		>XP_011534878.1 nesprin-2 isoform X1	6
>XP_011534879.1 nesprin-2 isoform X1 [Homo sapiens]	common SCSs = 6		>XP_011534879.1 nesprin-2 isoform X1	6
>XP_011534880.1 nesprin-2 isoform X2 [Homo sapiens]	common SCSs = 6		>XP_011534880.1 nesprin-2 isoform X2	6
>XP_011534881.1 nesprin-2 isoform X4 [Homo sapiens]	common SCSs = 6		>XP_011534881.1 nesprin-2 isoform X4	6
>XP_011534882.1 nesprin-2 isoform X6 [Homo sapiens]	common SCSs = 6		>XP_011534882.1 nesprin-2 isoform X6	6
>XP_011534883.1 nesprin-2 isoform X8 [Homo sapiens]	common SCSs = 6		>XP_011534883.1 nesprin-2 isoform X8	6
>XP_011534884.1 nesprin-2 isoform X11 [Homo sapiens]	common SCSs = 6		>XP_011534884.1 nesprin-2 isoform X11	6
>XP_011539410.2 E3 ubiquitin-protein ligase UBR4 isoform X1 [Homo sapiens]	common SCSs = 6		>XP_011539410.2 E3 ubiquitin-protein ligase UBR4 isoform X1	6
>XP_011539411.2 E3 ubiquitin-protein ligase UBR4 isoform X2 [Homo sapiens]	common SCSs = 6		>XP_011539411.2 E3 ubiquitin-protein ligase UBR4 isoform X2	6
>XP_011539412.2 E3 ubiquitin-protein ligase UBR4 isoform X3 [Homo sapiens]	common SCSs = 6		>XP_011539412.2 E3 ubiquitin-protein ligase UBR4 isoform X3	6
>XP_011539413.2 E3 ubiquitin-protein ligase UBR4 isoform X4 [Homo sapiens]	common SCSs = 6		>XP_011539413.2 E3 ubiquitin-protein ligase UBR4 isoform X4	6
>XP_011539414.2 E3 ubiquitin-protein ligase UBR4 isoform X5 [Homo sapiens]	common SCSs = 6		>XP_011539414.2 E3 ubiquitin-protein ligase UBR4 isoform X5	6
>XP_011539415.2 E3 ubiquitin-protein ligase UBR4 isoform X6 [Homo sapiens]	common SCSs = 6		>XP_011539415.2 E3 ubiquitin-protein ligase UBR4 isoform X6	6
>XP_011539418.2 E3 ubiquitin-protein ligase UBR4 isoform X10 [Homo sapiens]	common SCSs = 6		>XP_011539418.2 E3 ubiquitin-protein ligase UBR4 isoform X10	6
>XP_011539419.2 E3 ubiquitin-protein ligase UBR4 isoform X12 [Homo sapiens]	common SCSs = 6		>XP_011539419.2 E3 ubiquitin-protein ligase UBR4 isoform X12	6
>XP_011539420.2 E3 ubiquitin-protein ligase UBR4 isoform X13 [Homo sapiens]	common SCSs = 6		>XP_011539420.2 E3 ubiquitin-protein ligase UBR4 isoform X13	6
>XP_011539421.2 E3 ubiquitin-protein ligase UBR4 isoform X17 [Homo sapiens]	common SCSs = 6		>XP_011539421.2 E3 ubiquitin-protein ligase UBR4 isoform X17	6
>XP_011539620.1 basement membrane-specific heparan sulfate proteoglycan core protein isoform X1 [Homo sapiens]	common SCSs = 6		>XP_011539620.1 basement membrane-specific heparan sulfate proteoglycan core protein isoform X1	6
>XP_016856312.2 E3 ubiquitin-protein ligase UBR4 isoform X11 [Homo sapiens]	common SCSs = 6		>XP_016856312.2 E3 ubiquitin-protein ligase UBR4 isoform X11	6
>XP_016856314.2 E3 ubiquitin-protein ligase UBR4 isoform X15 [Homo sapiens]	common SCSs = 6		>XP_016856314.2 E3 ubiquitin-protein ligase UBR4 isoform X15	6
>XP_016856609.1 basement membrane-specific heparan sulfate proteoglycan core protein isoform X2 [Homo sapiens]	common SCSs = 6		>XP_016856609.1 basement membrane-specific heparan sulfate proteoglycan core protein isoform X2	6
>XP_016856610.1 basement membrane-specific heparan sulfate proteoglycan core protein isoform X3 [Homo sapiens]	common SCSs = 6		>XP_016856610.1 basement membrane-specific heparan sulfate proteoglycan core protein isoform X3	6
>XP_016856611.1 basement membrane-specific heparan sulfate proteoglycan core protein isoform X4 [Homo sapiens]	common SCSs = 6		>XP_016856611.1 basement membrane-specific heparan sulfate proteoglycan core protein isoform X4	6
>XP_016857517.1 ryanodine receptor 2 isoform X3 [Homo sapiens]	common SCSs = 6		>XP_016857517.1 ryanodine receptor 2 isoform X3	6
>XP_016859382.1 protein unc-80 homolog isoform X17 [Homo sapiens]	common SCSs = 6		>XP_016859382.1 protein unc-80 homolog isoform X17	6
>XP_016859383.1 protein unc-80 homolog isoform X18 [Homo sapiens]	common SCSs = 6		>XP_016859383.1 protein unc-80 homolog isoform X18	6
>XP_016865463.1 adhesion G-protein coupled receptor V1 isoform X12 [Homo sapiens]	common SCSs = 6		>XP_016865463.1 adhesion G-protein coupled receptor V1 isoform X12	6
>XP_016867978.1 histone-lysine N-methyltransferase 2C isoform X23 [Homo sapiens]	common SCSs = 6		>XP_016867978.1 histone-lysine N-methyltransferase 2C isoform X23	6
>XP_016867979.1 histone-lysine N-methyltransferase 2C isoform X24 [Homo sapiens]	common SCSs = 6		>XP_016867979.1 histone-lysine N-methyltransferase 2C isoform X24	6
>XP_016875039.1 retroelement silencing factor 1 isoform X1 [Homo sapiens]	common SCSs = 6		>XP_016875039.1 retroelement silencing factor 1 isoform X1	6
>XP_016876590.1 nesprin-2 isoform X1 [Homo sapiens]	common SCSs = 6		>XP_016876590.1 nesprin-2 isoform X1	6
>XP_016876591.1 nesprin-2 isoform X7 [Homo sapiens]	common SCSs = 6		>XP_016876591.1 nesprin-2 isoform X7	6
>XP_016878516.1 NLR family CARD domain-containing protein 3 isoform X1 [Homo sapiens]	common SCSs = 6		>XP_016878516.1 NLR family CARD domain-containing protein 3 isoform X1	6
>XP_016878517.1 NLR family CARD domain-containing protein 3 isoform X1 [Homo sapiens]	common SCSs = 6		>XP_016878517.1 NLR family CARD domain-containing protein 3 isoform X1	6
>XP_016878518.1 NLR family CARD domain-containing protein 3 isoform X1 [Homo sapiens]	common SCSs = 6		>XP_016878518.1 NLR family CARD domain-containing protein 3 isoform X1	6
>XP_016878519.1 NLR family CARD domain-containing protein 3 isoform X1 [Homo sapiens]	common SCSs = 6		>XP_016878519.1 NLR family CARD domain-containing protein 3 isoform X1	6
>XP_016878520.1 NLR family CARD domain-containing protein 3 isoform X1 [Homo sapiens]	common SCSs = 6		>XP_016878520.1 NLR family CARD domain-containing protein 3 isoform X1	6
>XP_016878522.1 NLR family CARD domain-containing protein 3 isoform X1 [Homo sapiens]	common SCSs = 6		>XP_016878522.1 NLR family CARD domain-containing protein 3 isoform X1	6
>XP_016878523.1 NLR family CARD domain-containing protein 3 isoform X1 [Homo sapiens]	common SCSs = 6		>XP_016878523.1 NLR family CARD domain-containing protein 3 isoform X1	6
>XP_016878524.1 NLR family CARD domain-containing protein 3 isoform X1 [Homo sapiens]	common SCSs = 6		>XP_016878524.1 NLR family CARD domain-containing protein 3 isoform X1	6
>XP_016878525.1 NLR family CARD domain-containing protein 3 isoform X1 [Homo sapiens]	common SCSs = 6		>XP_016878525.1 NLR family CARD domain-containing protein 3 isoform X1	6
>XP_016879977.1 KAT8 regulatory NSL complex subunit 1 isoform X5 [Homo sapiens]	common SCSs = 6		>XP_016879977.1 KAT8 regulatory NSL complex subunit 1 isoform X5	6
>XP_016884680.1 E3 ubiquitin-protein ligase HUWE1 isoform X1 [Homo sapiens]	common SCSs = 6		>XP_016884680.1 E3 ubiquitin-protein ligase HUWE1 isoform X1	6
>XP_016884681.1 E3 ubiquitin-protein ligase HUWE1 isoform X2 [Homo sapiens]	common SCSs = 6		>XP_016884681.1 E3 ubiquitin-protein ligase HUWE1 isoform X2	6
>XP_016884682.1 E3 ubiquitin-protein ligase HUWE1 isoform X3 [Homo sapiens]	common SCSs = 6		>XP_016884682.1 E3 ubiquitin-protein ligase HUWE1 isoform X3	6
>XP_016884683.1 E3 ubiquitin-protein ligase HUWE1 isoform X4 [Homo sapiens]	common SCSs = 6		>XP_016884683.1 E3 ubiquitin-protein ligase HUWE1 isoform X4	6
>XP_016884684.1 E3 ubiquitin-protein ligase HUWE1 isoform X5 [Homo sapiens]	common SCSs = 6		>XP_016884684.1 E3 ubiquitin-protein ligase HUWE1 isoform X5	6
>XP_016884685.1 E3 ubiquitin-protein ligase HUWE1 isoform X6 [Homo sapiens]	common SCSs = 6		>XP_016884685.1 E3 ubiquitin-protein ligase HUWE1 isoform X6	6
>XP_016884686.1 E3 ubiquitin-protein ligase HUWE1 isoform X7 [Homo sapiens]	common SCSs = 6		>XP_016884686.1 E3 ubiquitin-protein ligase HUWE1 isoform X7	6
>XP_016884687.1 E3 ubiquitin-protein ligase HUWE1 isoform X8 [Homo sapiens]	common SCSs = 6		>XP_016884687.1 E3 ubiquitin-protein ligase HUWE1 isoform X8	6
>XP_016884688.1 E3 ubiquitin-protein ligase HUWE1 isoform X8 [Homo sapiens]	common SCSs = 6		>XP_016884688.1 E3 ubiquitin-protein ligase HUWE1 isoform X8	6
>XP_016884689.1 E3 ubiquitin-protein ligase HUWE1 isoform X8 [Homo sapiens]	common SCSs = 6		>XP_016884689.1 E3 ubiquitin-protein ligase HUWE1 isoform X8	6
>XP_016884690.1 E3 ubiquitin-protein ligase HUWE1 isoform X8 [Homo sapiens]	common SCSs = 6		>XP_016884690.1 E3 ubiquitin-protein ligase HUWE1 isoform X8	6
>XP_016884691.1 E3 ubiquitin-protein ligase HUWE1 isoform X8 [Homo sapiens]	common SCSs = 6		>XP_016884691.1 E3 ubiquitin-protein ligase HUWE1 isoform X8	6
>XP_016884692.1 E3 ubiquitin-protein ligase HUWE1 isoform X8 [Homo sapiens]	common SCSs = 6		>XP_016884692.1 E3 ubiquitin-protein ligase HUWE1 isoform X8	6
>XP_016884693.1 E3 ubiquitin-protein ligase HUWE1 isoform X10 [Homo sapiens]	common SCSs = 6		>XP_016884693.1 E3 ubiquitin-protein ligase HUWE1 isoform X10	6
>XP_016885567.1 probable ubiquitin carboxyl-terminal hydrolase FAF-Y isoform X1 [Homo sapiens]	common SCSs = 6		>XP_016885567.1 probable ubiquitin carboxyl-terminal hydrolase FAF-Y isoform X1	6
>XP_024308090.1 E3 ubiquitin-protein ligase HUWE1 isoform X9 [Homo sapiens]	common SCSs = 6		>XP_024308090.1 E3 ubiquitin-protein ligase HUWE1 isoform X9	6
>NP_000258.1 neurofibromin isoform 2 [Homo sapiens]	common SCSs = 5		>NP_000258.1 neurofibromin isoform 2	5
>NP_000375.3 apolipoprotein B-100 precursor [Homo sapiens]	common SCSs = 5		>NP_000375.3 apolipoprotein B-100 precursor	5
>NP_001029.1 amiloride-sensitive sodium channel subunit alpha isoform 1 [Homo sapiens]	common SCSs = 5		>NP_001029.1 amiloride-sensitive sodium channel subunit alpha isoform 1	5
>NP_001032895.2 nck-associated protein 5-like [Homo sapiens]	common SCSs = 5		>NP_001032895.2 nck-associated protein 5-like	5
>NP_001035207.1 arf-GAP with Rho-GAP domain, ANK repeat and PH domain-containing protein 1 isoform c [Homo sapiens]	common SCSs = 5		>NP_001035207.1 arf-GAP with Rho-GAP domain, ANK repeat and PH domain-containing protein 1 isoform c	5
>NP_001035957.1 neurofibromin isoform 1 [Homo sapiens]	common SCSs = 5		>NP_001035957.1 neurofibromin isoform 1	5
>NP_001041665.1 homeodomain-interacting protein kinase 3 isoform 2 [Homo sapiens]	common SCSs = 5		>NP_001041665.1 homeodomain-interacting protein kinase 3 isoform 2	5
>NP_001073986.1 histone-lysine N-methyltransferase SETD5 isoform 1 [Homo sapiens]	common SCSs = 5		>NP_001073986.1 histone-lysine N-methyltransferase SETD5 isoform 1	5
>NP_001092093.2 obscurin isoform b [Homo sapiens]	common SCSs = 5		>NP_001092093.2 obscurin isoform b	5
>NP_001092286.2 teneurin-4 [Homo sapiens]	common SCSs = 5		>NP_001092286.2 teneurin-4	5
>NP_001135451.1 TP53-binding protein 1 isoform 2 [Homo sapiens]	common SCSs = 5		>NP_001135451.1 TP53-binding protein 1 isoform 2	5
>NP_001135452.1 TP53-binding protein 1 isoform 1 [Homo sapiens]	common SCSs = 5		>NP_001135452.1 TP53-binding protein 1 isoform 1	5
>NP_001139669.1 coiled-coil domain-containing protein 168 [Homo sapiens]	common SCSs = 5		>NP_001139669.1 coiled-coil domain-containing protein 168	5
>NP_001153047.1 amiloride-sensitive sodium channel subunit alpha isoform 3 [Homo sapiens]	common SCSs = 5		>NP_001153047.1 amiloride-sensitive sodium channel subunit alpha isoform 3	5
>NP_001153048.1 amiloride-sensitive sodium channel subunit alpha isoform 2 [Homo sapiens]	common SCSs = 5		>NP_001153048.1 amiloride-sensitive sodium channel subunit alpha isoform 2	5
>NP_001157743.1 rho GTPase-activating protein 7 isoform 4 [Homo sapiens]	common SCSs = 5		>NP_001157743.1 rho GTPase-activating protein 7 isoform 4	5
>NP_001161846.1 dyslexia-associated protein KIAA0319 isoform b [Homo sapiens]	common SCSs = 5		>NP_001161846.1 dyslexia-associated protein KIAA0319 isoform b	5
>NP_001161847.1 dyslexia-associated protein KIAA0319 isoform a precursor [Homo sapiens]	common SCSs = 5		>NP_001161847.1 dyslexia-associated protein KIAA0319 isoform a precursor	5
>NP_001161848.1 dyslexia-associated protein KIAA0319 isoform c [Homo sapiens]	common SCSs = 5		>NP_001161848.1 dyslexia-associated protein KIAA0319 isoform c	5
>NP_001161849.1 dyslexia-associated protein KIAA0319 isoform d precursor [Homo sapiens]	common SCSs = 5		>NP_001161849.1 dyslexia-associated protein KIAA0319 isoform d precursor	5
>NP_001171134.1 telomere-associated protein RIF1 isoform 2 [Homo sapiens]	common SCSs = 5		>NP_001171134.1 telomere-associated protein RIF1 isoform 2	5
>NP_001171135.1 telomere-associated protein RIF1 isoform 2 [Homo sapiens]	common SCSs = 5		>NP_001171135.1 telomere-associated protein RIF1 isoform 2	5
>NP_001171136.1 telomere-associated protein RIF1 isoform 2 [Homo sapiens]	common SCSs = 5		>NP_001171136.1 telomere-associated protein RIF1 isoform 2	5
>NP_001184033.1 histone-lysine N-methyltransferase 2A isoform 1 [Homo sapiens]	common SCSs = 5		>NP_001184033.1 histone-lysine N-methyltransferase 2A isoform 1	5
>NP_001231509.1 transformation/transcription domain-associated protein isoform 1 [Homo sapiens]	common SCSs = 5		>NP_001231509.1 transformation/transcription domain-associated protein isoform 1	5
>NP_001240316.1 neural cell adhesion molecule L1-like protein isoform 2 precursor [Homo sapiens]	common SCSs = 5		>NP_001240316.1 neural cell adhesion molecule L1-like protein isoform 2 precursor	5
>NP_001240317.1 neural cell adhesion molecule L1-like protein isoform 3 precursor [Homo sapiens]	common SCSs = 5		>NP_001240317.1 neural cell adhesion molecule L1-like protein isoform 3 precursor	5
>NP_001245308.1 sodium bicarbonate cotransporter 3 isoform b [Homo sapiens]	common SCSs = 5		>NP_001245308.1 sodium bicarbonate cotransporter 3 isoform b	5
>NP_001245309.1 sodium bicarbonate cotransporter 3 isoform c [Homo sapiens]	common SCSs = 5		>NP_001245309.1 sodium bicarbonate cotransporter 3 isoform c	5
>NP_001248335.1 multiple PDZ domain protein isoform 2 [Homo sapiens]	common SCSs = 5		>NP_001248335.1 multiple PDZ domain protein isoform 2	5
>NP_001248336.1 multiple PDZ domain protein isoform 3 [Homo sapiens]	common SCSs = 5		>NP_001248336.1 multiple PDZ domain protein isoform 3	5
>NP_001258152.2 obscurin isoform IC [Homo sapiens]	common SCSs = 5		>NP_001258152.2 obscurin isoform IC	5
>NP_001264198.1 otogelin isoform a precursor [Homo sapiens]	common SCSs = 5		>NP_001264198.1 otogelin isoform a precursor	5
>NP_001265091.1 homeodomain-interacting protein kinase 3 isoform 2 [Homo sapiens]	common SCSs = 5		>NP_001265091.1 homeodomain-interacting protein kinase 3 isoform 2	5
>NP_001265092.1 homeodomain-interacting protein kinase 3 isoform 2 [Homo sapiens]	common SCSs = 5		>NP_001265092.1 homeodomain-interacting protein kinase 3 isoform 2	5
>NP_001265398.1 protein MON2 homolog isoform 2 [Homo sapiens]	common SCSs = 5		>NP_001265398.1 protein MON2 homolog isoform 2	5
>NP_001265399.1 protein MON2 homolog isoform 3 [Homo sapiens]	common SCSs = 5		>NP_001265399.1 protein MON2 homolog isoform 3	5
>NP_001265400.1 protein MON2 homolog isoform 4 [Homo sapiens]	common SCSs = 5		>NP_001265400.1 protein MON2 homolog isoform 4	5
>NP_001268669.1 FH1/FH2 domain-containing protein 3 isoform 3 [Homo sapiens]	common SCSs = 5		>NP_001268669.1 FH1/FH2 domain-containing protein 3 isoform 3	5
>NP_001273360.1 DNA polymerase zeta catalytic subunit isoform b [Homo sapiens]	common SCSs = 5		>NP_001273360.1 DNA polymerase zeta catalytic subunit isoform b	5
>NP_001273361.1 DNA polymerase zeta catalytic subunit isoform b [Homo sapiens]	common SCSs = 5		>NP_001273361.1 DNA polymerase zeta catalytic subunit isoform b	5
>NP_001278992.1 otogelin isoform b precursor [Homo sapiens]	common SCSs = 5		>NP_001278992.1 otogelin isoform b precursor	5
>NP_001280555.1 putative maltase-glucoamylase-like protein FLJ16351 [Homo sapiens]	common SCSs = 5		>NP_001280555.1 putative maltase-glucoamylase-like protein FLJ16351	5
>NP_001295089.1 pecanex-like protein 1 isoform 2 [Homo sapiens]	common SCSs = 5		>NP_001295089.1 pecanex-like protein 1 isoform 2	5
>NP_001303597.1 rho GTPase-activating protein 7 isoform 5 [Homo sapiens]	common SCSs = 5		>NP_001303597.1 rho GTPase-activating protein 7 isoform 5	5
>NP_001304824.1 protein mono-ADP-ribosyltransferase PARP10 isoform 2 [Homo sapiens]	common SCSs = 5		>NP_001304824.1 protein mono-ADP-ribosyltransferase PARP10 isoform 2	5
>NP_001307676.1 envoplakin isoform 1 [Homo sapiens]	common SCSs = 5		>NP_001307676.1 envoplakin isoform 1	5
>NP_001308032.1 sodium bicarbonate cotransporter 3 isoform d [Homo sapiens]	common SCSs = 5		>NP_001308032.1 sodium bicarbonate cotransporter 3 isoform d	5
>NP_001308033.1 sodium bicarbonate cotransporter 3 isoform e [Homo sapiens]	common SCSs = 5		>NP_001308033.1 sodium bicarbonate cotransporter 3 isoform e	5
>NP_001308034.1 sodium bicarbonate cotransporter 3 isoform f [Homo sapiens]	common SCSs = 5		>NP_001308034.1 sodium bicarbonate cotransporter 3 isoform f	5
>NP_001308035.1 sodium bicarbonate cotransporter 3 isoform g [Homo sapiens]	common SCSs = 5		>NP_001308035.1 sodium bicarbonate cotransporter 3 isoform g	5
>NP_001308036.1 sodium bicarbonate cotransporter 3 isoform h [Homo sapiens]	common SCSs = 5		>NP_001308036.1 sodium bicarbonate cotransporter 3 isoform h	5
>NP_001308037.1 sodium bicarbonate cotransporter 3 isoform i [Homo sapiens]	common SCSs = 5		>NP_001308037.1 sodium bicarbonate cotransporter 3 isoform i	5
>NP_001308236.1 protein NPAT isoform 1 [Homo sapiens]	common SCSs = 5		>NP_001308236.1 protein NPAT isoform 1	5
>NP_001317566.1 multiple PDZ domain protein isoform 4 [Homo sapiens]	common SCSs = 5		>NP_001317566.1 multiple PDZ domain protein isoform 4	5
>NP_001332853.1 thyroid adenoma-associated protein isoform e [Homo sapiens]	common SCSs = 5		>NP_001332853.1 thyroid adenoma-associated protein isoform e	5
>NP_001333697.1 unconventional myosin-XVIIIa isoform f [Homo sapiens]	common SCSs = 5		>NP_001333697.1 unconventional myosin-XVIIIa isoform f	5
>NP_001335010.1 rho GTPase-activating protein 7 isoform 1 [Homo sapiens]	common SCSs = 5		>NP_001335010.1 rho GTPase-activating protein 7 isoform 1	5
>NP_001335011.1 rho GTPase-activating protein 7 isoform 4 [Homo sapiens]	common SCSs = 5		>NP_001335011.1 rho GTPase-activating protein 7 isoform 4	5
>NP_001335012.1 rho GTPase-activating protein 7 isoform 4 [Homo sapiens]	common SCSs = 5		>NP_001335012.1 rho GTPase-activating protein 7 isoform 4	5
>NP_001335013.1 rho GTPase-activating protein 7 isoform 4 [Homo sapiens]	common SCSs = 5		>NP_001335013.1 rho GTPase-activating protein 7 isoform 4	5
>NP_001336992.1 protein TANC1 isoform 4 [Homo sapiens]	common SCSs = 5		>NP_001336992.1 protein TANC1 isoform 4	5
>NP_001336993.1 protein TANC1 isoform 5 [Homo sapiens]	common SCSs = 5		>NP_001336993.1 protein TANC1 isoform 5	5
>NP_001336994.1 protein TANC1 isoform 5 [Homo sapiens]	common SCSs = 5		>NP_001336994.1 protein TANC1 isoform 5	5
>NP_001337332.1 dyslexia-associated protein KIAA0319 isoform a precursor [Homo sapiens]	common SCSs = 5		>NP_001337332.1 dyslexia-associated protein KIAA0319 isoform a precursor	5
>NP_001337333.1 dyslexia-associated protein KIAA0319 isoform f [Homo sapiens]	common SCSs = 5		>NP_001337333.1 dyslexia-associated protein KIAA0319 isoform f	5
>NP_001337334.1 dyslexia-associated protein KIAA0319 isoform g precursor [Homo sapiens]	common SCSs = 5		>NP_001337334.1 dyslexia-associated protein KIAA0319 isoform g precursor	5
>NP_001337335.1 dyslexia-associated protein KIAA0319 isoform c [Homo sapiens]	common SCSs = 5		>NP_001337335.1 dyslexia-associated protein KIAA0319 isoform c	5
>NP_001337336.1 dyslexia-associated protein KIAA0319 isoform h precursor [Homo sapiens]	common SCSs = 5		>NP_001337336.1 dyslexia-associated protein KIAA0319 isoform h precursor	5
>NP_001337337.1 dyslexia-associated protein KIAA0319 isoform h precursor [Homo sapiens]	common SCSs = 5		>NP_001337337.1 dyslexia-associated protein KIAA0319 isoform h precursor	5
>NP_001352055.1 nuclear pore complex protein Nup98-Nup96 isoform 6 precursor [Homo sapiens]	common SCSs = 5		>NP_001352055.1 nuclear pore complex protein Nup98-Nup96 isoform 6 precursor	5
>NP_001354553.1 zinc finger protein 469 [Homo sapiens]	common SCSs = 5		>NP_001354553.1 zinc finger protein 469	5
>NP_001354977.1 nck-associated protein 5-like [Homo sapiens]	common SCSs = 5		>NP_001354977.1 nck-associated protein 5-like	5
>NP_001359007.1 DNA polymerase zeta catalytic subunit isoform a [Homo sapiens]	common SCSs = 5		>NP_001359007.1 DNA polymerase zeta catalytic subunit isoform a	5
>NP_001362342.1 multiple PDZ domain protein isoform 5 [Homo sapiens]	common SCSs = 5		>NP_001362342.1 multiple PDZ domain protein isoform 5	5
>NP_001362345.1 multiple PDZ domain protein isoform 2 [Homo sapiens]	common SCSs = 5		>NP_001362345.1 multiple PDZ domain protein isoform 2	5
>NP_001362346.1 multiple PDZ domain protein isoform 2 [Homo sapiens]	common SCSs = 5		>NP_001362346.1 multiple PDZ domain protein isoform 2	5
>NP_001362347.1 multiple PDZ domain protein isoform 2 [Homo sapiens]	common SCSs = 5		>NP_001362347.1 multiple PDZ domain protein isoform 2	5
>NP_001362348.1 multiple PDZ domain protein isoform 3 [Homo sapiens]	common SCSs = 5		>NP_001362348.1 multiple PDZ domain protein isoform 3	5
>NP_001362349.1 multiple PDZ domain protein isoform 6 [Homo sapiens]	common SCSs = 5		>NP_001362349.1 multiple PDZ domain protein isoform 6	5
>NP_001362350.1 multiple PDZ domain protein isoform 6 [Homo sapiens]	common SCSs = 5		>NP_001362350.1 multiple PDZ domain protein isoform 6	5
>NP_001362351.1 multiple PDZ domain protein isoform 6 [Homo sapiens]	common SCSs = 5		>NP_001362351.1 multiple PDZ domain protein isoform 6	5
>NP_001362352.1 multiple PDZ domain protein isoform 6 [Homo sapiens]	common SCSs = 5		>NP_001362352.1 multiple PDZ domain protein isoform 6	5
>NP_001362353.1 multiple PDZ domain protein isoform 6 [Homo sapiens]	common SCSs = 5		>NP_001362353.1 multiple PDZ domain protein isoform 6	5
>NP_001362354.1 multiple PDZ domain protein isoform 7 [Homo sapiens]	common SCSs = 5		>NP_001362354.1 multiple PDZ domain protein isoform 7	5
>NP_001362355.1 multiple PDZ domain protein isoform 7 [Homo sapiens]	common SCSs = 5		>NP_001362355.1 multiple PDZ domain protein isoform 7	5
>NP_001362453.1 transformation/transcription domain-associated protein isoform 3 [Homo sapiens]	common SCSs = 5		>NP_001362453.1 transformation/transcription domain-associated protein isoform 3	5
>NP_001365054.1 baculoviral IAP repeat-containing protein 6 isoform 2 [Homo sapiens]	common SCSs = 5		>NP_001365054.1 baculoviral IAP repeat-containing protein 6 isoform 2	5
>NP_001365707.1 multiple PDZ domain protein isoform 4 [Homo sapiens]	common SCSs = 5		>NP_001365707.1 multiple PDZ domain protein isoform 4	5
>NP_001371376.1 sorbin and SH3 domain-containing protein 1 isoform 26 [Homo sapiens]	common SCSs = 5		>NP_001371376.1 sorbin and SH3 domain-containing protein 1 isoform 26	5
>NP_001371377.1 sorbin and SH3 domain-containing protein 1 isoform 27 [Homo sapiens]	common SCSs = 5		>NP_001371377.1 sorbin and SH3 domain-containing protein 1 isoform 27	5
>NP_001371378.1 sorbin and SH3 domain-containing protein 1 isoform 28 [Homo sapiens]	common SCSs = 5		>NP_001371378.1 sorbin and SH3 domain-containing protein 1 isoform 28	5
>NP_001371379.1 sorbin and SH3 domain-containing protein 1 isoform 29 [Homo sapiens]	common SCSs = 5		>NP_001371379.1 sorbin and SH3 domain-containing protein 1 isoform 29	5
>NP_001371381.1 sorbin and SH3 domain-containing protein 1 isoform 31 [Homo sapiens]	common SCSs = 5		>NP_001371381.1 sorbin and SH3 domain-containing protein 1 isoform 31	5
>NP_001373054.1 obscurin isoform c [Homo sapiens]	common SCSs = 5		>NP_001373054.1 obscurin isoform c	5
>NP_001979.2 envoplakin isoform 2 [Homo sapiens]	common SCSs = 5		>NP_001979.2 envoplakin isoform 2	5
>NP_002510.2 protein NPAT isoform 2 [Homo sapiens]	common SCSs = 5		>NP_002510.2 protein NPAT isoform 2	5
>NP_002903.3 DNA polymerase zeta catalytic subunit isoform a [Homo sapiens]	common SCSs = 5		>NP_002903.3 DNA polymerase zeta catalytic subunit isoform a	5
>NP_003473.3 histone-lysine N-methyltransferase 2D [Homo sapiens]	common SCSs = 5		>NP_003473.3 histone-lysine N-methyltransferase 2D	5
>NP_003487.1 transformation/transcription domain-associated protein isoform 2 [Homo sapiens]	common SCSs = 5		>NP_003487.1 transformation/transcription domain-associated protein isoform 2	5
>NP_003606.3 sodium bicarbonate cotransporter 3 isoform a [Homo sapiens]	common SCSs = 5		>NP_003606.3 sodium bicarbonate cotransporter 3 isoform a	5
>NP_003820.2 multiple PDZ domain protein isoform 1 [Homo sapiens]	common SCSs = 5		>NP_003820.2 multiple PDZ domain protein isoform 1	5
>NP_004406.2 desmoplakin isoform I [Homo sapiens]	common SCSs = 5		>NP_004406.2 desmoplakin isoform I	5
>NP_005036.2 reelin isoform a precursor [Homo sapiens]	common SCSs = 5		>NP_005036.2 reelin isoform a precursor	5
>NP_005648.1 TP53-binding protein 1 isoform 3 [Homo sapiens]	common SCSs = 5		>NP_005648.1 TP53-binding protein 1 isoform 3	5
>NP_005725.3 homeodomain-interacting protein kinase 3 isoform 1 [Homo sapiens]	common SCSs = 5		>NP_005725.3 homeodomain-interacting protein kinase 3 isoform 1	5
>NP_005886.2 golgin subfamily A member 3 isoform 1 [Homo sapiens]	common SCSs = 5		>NP_005886.2 golgin subfamily A member 3 isoform 1	5
>NP_005924.2 histone-lysine N-methyltransferase 2A isoform 2 precursor [Homo sapiens]	common SCSs = 5		>NP_005924.2 histone-lysine N-methyltransferase 2A isoform 2 precursor	5
>NP_005951.1 mucin-3A precursor [Homo sapiens]	common SCSs = 5		>NP_005951.1 mucin-3A precursor	5
>NP_006085.2 rho GTPase-activating protein 7 isoform 2 [Homo sapiens]	common SCSs = 5		>NP_006085.2 rho GTPase-activating protein 7 isoform 2	5
>NP_006605.2 neural cell adhesion molecule L1-like protein isoform 1 precursor [Homo sapiens]	common SCSs = 5		>NP_006605.2 neural cell adhesion molecule L1-like protein isoform 1 precursor	5
>NP_055325.2 protein piccolo isoform 2 [Homo sapiens]	common SCSs = 5		>NP_055325.2 protein piccolo isoform 2	5
>NP_055624.2 dyslexia-associated protein KIAA0319 isoform a precursor [Homo sapiens]	common SCSs = 5		>NP_055624.2 dyslexia-associated protein KIAA0319 isoform a precursor	5
>NP_055797.2 pecanex-like protein 1 isoform 1 [Homo sapiens]	common SCSs = 5		>NP_055797.2 pecanex-like protein 1 isoform 1	5
>NP_055841.2 protein MON2 homolog isoform 1 [Homo sapiens]	common SCSs = 5		>NP_055841.2 protein MON2 homolog isoform 1	5
>NP_055987.2 protein PRRC2C [Homo sapiens]	common SCSs = 5		>NP_055987.2 protein PRRC2C	5
>NP_056110.2 structural maintenance of chromosomes flexible hinge domain-containing protein 1 [Homo sapiens]	common SCSs = 5		>NP_056110.2 structural maintenance of chromosomes flexible hinge domain-containing protein 1	5
>NP_057336.3 baculoviral IAP repeat-containing protein 6 isoform 1 [Homo sapiens]	common SCSs = 5		>NP_057336.3 baculoviral IAP repeat-containing protein 6 isoform 1	5
>NP_060621.3 telomere-associated protein RIF1 isoform 1 [Homo sapiens]	common SCSs = 5		>NP_060621.3 telomere-associated protein RIF1 isoform 1	5
>NP_065772.1 acrosomal protein KIAA1210 [Homo sapiens]	common SCSs = 5		>NP_065772.1 acrosomal protein KIAA1210	5
>NP_065816.2 E3 ubiquitin-protein ligase UBR4 [Homo sapiens]	common SCSs = 5		>NP_065816.2 E3 ubiquitin-protein ligase UBR4	5
>NP_065996.1 WD repeat- and FYVE domain-containing protein 4 isoform 1 [Homo sapiens]	common SCSs = 5		>NP_065996.1 WD repeat- and FYVE domain-containing protein 4 isoform 1	5
>NP_079350.5 extracellular matrix protein FRAS1 isoform 1 precursor [Homo sapiens]	common SCSs = 5		>NP_079350.5 extracellular matrix protein FRAS1 isoform 1 precursor	5
>NP_116178.2 protein mono-ADP-ribosyltransferase PARP10 isoform 1 [Homo sapiens]	common SCSs = 5		>NP_116178.2 protein mono-ADP-ribosyltransferase PARP10 isoform 1	5
>NP_149015.2 protein piccolo isoform 1 [Homo sapiens]	common SCSs = 5		>NP_149015.2 protein piccolo isoform 1	5
>NP_203752.2 protein TANC1 isoform 1 [Homo sapiens]	common SCSs = 5		>NP_203752.2 protein TANC1 isoform 1	5
>NP_443075.3 obscurin isoform a [Homo sapiens]	common SCSs = 5		>NP_443075.3 obscurin isoform a	5
>NP_443150.3 VPS10 domain-containing receptor SorCS1 isoform a precursor [Homo sapiens]	common SCSs = 5		>NP_443150.3 VPS10 domain-containing receptor SorCS1 isoform a precursor	5
>NP_619639.3 fibrocystin isoform 1 precursor [Homo sapiens]	common SCSs = 5		>NP_619639.3 fibrocystin isoform 1 precursor	5
>NP_689914.3 ATP-binding cassette sub-family A member 13 [Homo sapiens]	common SCSs = 5		>NP_689914.3 ATP-binding cassette sub-family A member 13	5
>NP_733842.2 fibrocystin isoform 2 precursor [Homo sapiens]	common SCSs = 5		>NP_733842.2 fibrocystin isoform 2 precursor	5
>NP_774959.1 reelin isoform b precursor [Homo sapiens]	common SCSs = 5		>NP_774959.1 reelin isoform b precursor	5
>NP_775899.3 dynein heavy chain 17, axonemal [Homo sapiens]	common SCSs = 5		>NP_775899.3 dynein heavy chain 17, axonemal	5
>NP_872584.2 rho GTPase-activating protein 7 isoform 1 [Homo sapiens]	common SCSs = 5		>NP_872584.2 rho GTPase-activating protein 7 isoform 1	5
>NP_996816.3 usherin isoform B precursor [Homo sapiens]	common SCSs = 5		>NP_996816.3 usherin isoform B precursor	5
>NP_997244.4 FRAS1-related extracellular matrix protein 2 precursor [Homo sapiens]	common SCSs = 5		>NP_997244.4 FRAS1-related extracellular matrix protein 2 precursor	5
>XP_005245072.1 protein PRRC2C isoform X1 [Homo sapiens]	common SCSs = 5		>XP_005245072.1 protein PRRC2C isoform X1	5
>XP_005245073.1 protein PRRC2C isoform X2 [Homo sapiens]	common SCSs = 5		>XP_005245073.1 protein PRRC2C isoform X2	5
>XP_005245074.1 protein PRRC2C isoform X3 [Homo sapiens]	common SCSs = 5		>XP_005245074.1 protein PRRC2C isoform X3	5
>XP_005245075.1 protein PRRC2C isoform X4 [Homo sapiens]	common SCSs = 5		>XP_005245075.1 protein PRRC2C isoform X4	5
>XP_005245076.1 protein PRRC2C isoform X7 [Homo sapiens]	common SCSs = 5		>XP_005245076.1 protein PRRC2C isoform X7	5
>XP_005245077.1 protein PRRC2C isoform X8 [Homo sapiens]	common SCSs = 5		>XP_005245077.1 protein PRRC2C isoform X8	5
>XP_005245080.1 protein PRRC2C isoform X10 [Homo sapiens]	common SCSs = 5		>XP_005245080.1 protein PRRC2C isoform X10	5
>XP_005245081.1 protein PRRC2C isoform X11 [Homo sapiens]	common SCSs = 5		>XP_005245081.1 protein PRRC2C isoform X11	5
>XP_005245082.1 protein PRRC2C isoform X13 [Homo sapiens]	common SCSs = 5		>XP_005245082.1 protein PRRC2C isoform X13	5
>XP_005245083.1 protein PRRC2C isoform X14 [Homo sapiens]	common SCSs = 5		>XP_005245083.1 protein PRRC2C isoform X14	5
>XP_005246722.1 telomere-associated protein RIF1 isoform X1 [Homo sapiens]	common SCSs = 5		>XP_005246722.1 telomere-associated protein RIF1 isoform X1	5
>XP_005246975.1 protein TANC1 isoform X7 [Homo sapiens]	common SCSs = 5		>XP_005246975.1 protein TANC1 isoform X7	5
>XP_005252786.1 homeodomain-interacting protein kinase 3 isoform X1 [Homo sapiens]	common SCSs = 5		>XP_005252786.1 homeodomain-interacting protein kinase 3 isoform X1	5
>XP_005254300.1 MAX gene-associated protein isoform X1 [Homo sapiens]	common SCSs = 5		>XP_005254300.1 MAX gene-associated protein isoform X1	5
>XP_005254301.1 MAX gene-associated protein isoform X1 [Homo sapiens]	common SCSs = 5		>XP_005254301.1 MAX gene-associated protein isoform X1	5
>XP_005254302.1 MAX gene-associated protein isoform X1 [Homo sapiens]	common SCSs = 5		>XP_005254302.1 MAX gene-associated protein isoform X1	5
>XP_005254303.1 MAX gene-associated protein isoform X1 [Homo sapiens]	common SCSs = 5		>XP_005254303.1 MAX gene-associated protein isoform X1	5
>XP_005254304.1 MAX gene-associated protein isoform X1 [Homo sapiens]	common SCSs = 5		>XP_005254304.1 MAX gene-associated protein isoform X1	5
>XP_005254305.1 MAX gene-associated protein isoform X2 [Homo sapiens]	common SCSs = 5		>XP_005254305.1 MAX gene-associated protein isoform X2	5
>XP_005254310.1 MAX gene-associated protein isoform X7 [Homo sapiens]	common SCSs = 5		>XP_005254310.1 MAX gene-associated protein isoform X7	5
>XP_005258406.1 FH1/FH2 domain-containing protein 3 isoform X6 [Homo sapiens]	common SCSs = 5		>XP_005258406.1 FH1/FH2 domain-containing protein 3 isoform X6	5
>XP_005264507.2 baculoviral IAP repeat-containing protein 6 isoform X2 [Homo sapiens]	common SCSs = 5		>XP_005264507.2 baculoviral IAP repeat-containing protein 6 isoform X2	5
>XP_005264508.2 baculoviral IAP repeat-containing protein 6 isoform X4 [Homo sapiens]	common SCSs = 5		>XP_005264508.2 baculoviral IAP repeat-containing protein 6 isoform X4	5
>XP_005264509.2 baculoviral IAP repeat-containing protein 6 isoform X5 [Homo sapiens]	common SCSs = 5		>XP_005264509.2 baculoviral IAP repeat-containing protein 6 isoform X5	5
>XP_005264510.2 baculoviral IAP repeat-containing protein 6 isoform X7 [Homo sapiens]	common SCSs = 5		>XP_005264510.2 baculoviral IAP repeat-containing protein 6 isoform X7	5
>XP_005264511.2 baculoviral IAP repeat-containing protein 6 isoform X11 [Homo sapiens]	common SCSs = 5		>XP_005264511.2 baculoviral IAP repeat-containing protein 6 isoform X11	5
>XP_005264512.2 baculoviral IAP repeat-containing protein 6 isoform X12 [Homo sapiens]	common SCSs = 5		>XP_005264512.2 baculoviral IAP repeat-containing protein 6 isoform X12	5
>XP_005265358.1 histone-lysine N-methyltransferase SETD5 isoform X10 [Homo sapiens]	common SCSs = 5		>XP_005265358.1 histone-lysine N-methyltransferase SETD5 isoform X10	5
>XP_005265655.1 sodium bicarbonate cotransporter 3 isoform X6 [Homo sapiens]	common SCSs = 5		>XP_005265655.1 sodium bicarbonate cotransporter 3 isoform X6	5
>XP_005265657.1 sodium bicarbonate cotransporter 3 isoform X9 [Homo sapiens]	common SCSs = 5		>XP_005265657.1 sodium bicarbonate cotransporter 3 isoform X9	5
>XP_005266221.1 golgin subfamily A member 3 isoform X2 [Homo sapiens]	common SCSs = 5		>XP_005266221.1 golgin subfamily A member 3 isoform X2	5
>XP_005266224.1 golgin subfamily A member 3 isoform X4 [Homo sapiens]	common SCSs = 5		>XP_005266224.1 golgin subfamily A member 3 isoform X4	5
>XP_005267477.1 pecanex-like protein 1 isoform X1 [Homo sapiens]	common SCSs = 5		>XP_005267477.1 pecanex-like protein 1 isoform X1	5
>XP_005267478.1 pecanex-like protein 1 isoform X2 [Homo sapiens]	common SCSs = 5		>XP_005267478.1 pecanex-like protein 1 isoform X2	5
>XP_005267479.1 pecanex-like protein 1 isoform X3 [Homo sapiens]	common SCSs = 5		>XP_005267479.1 pecanex-like protein 1 isoform X3	5
>XP_005267480.1 pecanex-like protein 1 isoform X4 [Homo sapiens]	common SCSs = 5		>XP_005267480.1 pecanex-like protein 1 isoform X4	5
>XP_005267481.2 pecanex-like protein 1 isoform X5 [Homo sapiens]	common SCSs = 5		>XP_005267481.2 pecanex-like protein 1 isoform X5	5
>XP_005267482.1 pecanex-like protein 1 isoform X6 [Homo sapiens]	common SCSs = 5		>XP_005267482.1 pecanex-like protein 1 isoform X6	5
>XP_005270061.1 WD repeat- and FYVE domain-containing protein 4 isoform X3 [Homo sapiens]	common SCSs = 5		>XP_005270061.1 WD repeat- and FYVE domain-containing protein 4 isoform X3	5
>XP_005273431.1 rho GTPase-activating protein 7 isoform X1 [Homo sapiens]	common SCSs = 5		>XP_005273431.1 rho GTPase-activating protein 7 isoform X1	5
>XP_006711301.1 protein PRRC2C isoform X5 [Homo sapiens]	common SCSs = 5		>XP_006711301.1 protein PRRC2C isoform X5	5
>XP_006711871.1 ryanodine receptor 2 isoform X8 [Homo sapiens]	common SCSs = 5		>XP_006711871.1 ryanodine receptor 2 isoform X8	5
>XP_006712117.1 baculoviral IAP repeat-containing protein 6 isoform X3 [Homo sapiens]	common SCSs = 5		>XP_006712117.1 baculoviral IAP repeat-containing protein 6 isoform X3	5
>XP_006712118.1 baculoviral IAP repeat-containing protein 6 isoform X6 [Homo sapiens]	common SCSs = 5		>XP_006712118.1 baculoviral IAP repeat-containing protein 6 isoform X6	5
>XP_006712119.1 baculoviral IAP repeat-containing protein 6 isoform X9 [Homo sapiens]	common SCSs = 5		>XP_006712119.1 baculoviral IAP repeat-containing protein 6 isoform X9	5
>XP_006712126.1 thyroid adenoma-associated protein isoform X1 [Homo sapiens]	common SCSs = 5		>XP_006712126.1 thyroid adenoma-associated protein isoform X1	5
>XP_006712873.1 protein TANC1 isoform X8 [Homo sapiens]	common SCSs = 5		>XP_006712873.1 protein TANC1 isoform X8	5
>XP_006712875.1 protein TANC1 isoform X12 [Homo sapiens]	common SCSs = 5		>XP_006712875.1 protein TANC1 isoform X12	5
>XP_006713001.1 neural cell adhesion molecule L1-like protein isoform X1 [Homo sapiens]	common SCSs = 5		>XP_006713001.1 neural cell adhesion molecule L1-like protein isoform X1	5
>XP_006713002.1 neural cell adhesion molecule L1-like protein isoform X1 [Homo sapiens]	common SCSs = 5		>XP_006713002.1 neural cell adhesion molecule L1-like protein isoform X1	5
>XP_006713003.1 neural cell adhesion molecule L1-like protein isoform X1 [Homo sapiens]	common SCSs = 5		>XP_006713003.1 neural cell adhesion molecule L1-like protein isoform X1	5
>XP_006713484.1 sodium bicarbonate cotransporter 3 isoform X1 [Homo sapiens]	common SCSs = 5		>XP_006713484.1 sodium bicarbonate cotransporter 3 isoform X1	5
>XP_006716949.1 multiple PDZ domain protein isoform X1 [Homo sapiens]	common SCSs = 5		>XP_006716949.1 multiple PDZ domain protein isoform X1	5
>XP_006716950.1 multiple PDZ domain protein isoform X1 [Homo sapiens]	common SCSs = 5		>XP_006716950.1 multiple PDZ domain protein isoform X1	5
>XP_006716951.1 multiple PDZ domain protein isoform X3 [Homo sapiens]	common SCSs = 5		>XP_006716951.1 multiple PDZ domain protein isoform X3	5
>XP_006719162.1 retroelement silencing factor 1 isoform X2 [Homo sapiens]	common SCSs = 5		>XP_006719162.1 retroelement silencing factor 1 isoform X2	5
>XP_006719588.1 nck-associated protein 5-like isoform X1 [Homo sapiens]	common SCSs = 5		>XP_006719588.1 nck-associated protein 5-like isoform X1	5
>XP_006719677.1 histone-lysine N-methyltransferase 2D isoform X6 [Homo sapiens]	common SCSs = 5		>XP_006719677.1 histone-lysine N-methyltransferase 2D isoform X6	5
>XP_006719679.1 histone-lysine N-methyltransferase 2D isoform X8 [Homo sapiens]	common SCSs = 5		>XP_006719679.1 histone-lysine N-methyltransferase 2D isoform X8	5
>XP_006719799.1 golgin subfamily A member 3 isoform X1 [Homo sapiens]	common SCSs = 5		>XP_006719799.1 golgin subfamily A member 3 isoform X1	5
>XP_006719800.1 golgin subfamily A member 3 isoform X1 [Homo sapiens]	common SCSs = 5		>XP_006719800.1 golgin subfamily A member 3 isoform X1	5
>XP_006719842.1 E3 ubiquitin-protein ligase MYCBP2 isoform X1 [Homo sapiens]	common SCSs = 5		>XP_006719842.1 E3 ubiquitin-protein ligase MYCBP2 isoform X1	5
>XP_006719843.1 E3 ubiquitin-protein ligase MYCBP2 isoform X2 [Homo sapiens]	common SCSs = 5		>XP_006719843.1 E3 ubiquitin-protein ligase MYCBP2 isoform X2	5
>XP_006719845.1 E3 ubiquitin-protein ligase MYCBP2 isoform X5 [Homo sapiens]	common SCSs = 5		>XP_006719845.1 E3 ubiquitin-protein ligase MYCBP2 isoform X5	5
>XP_006719846.1 E3 ubiquitin-protein ligase MYCBP2 isoform X6 [Homo sapiens]	common SCSs = 5		>XP_006719846.1 E3 ubiquitin-protein ligase MYCBP2 isoform X6	5
>XP_006719847.1 E3 ubiquitin-protein ligase MYCBP2 isoform X7 [Homo sapiens]	common SCSs = 5		>XP_006719847.1 E3 ubiquitin-protein ligase MYCBP2 isoform X7	5
>XP_006719850.1 E3 ubiquitin-protein ligase MYCBP2 isoform X15 [Homo sapiens]	common SCSs = 5		>XP_006719850.1 E3 ubiquitin-protein ligase MYCBP2 isoform X15	5
>XP_006720145.1 pecanex-like protein 1 isoform X10 [Homo sapiens]	common SCSs = 5		>XP_006720145.1 pecanex-like protein 1 isoform X10	5
>XP_006720506.1 MAX gene-associated protein isoform X1 [Homo sapiens]	common SCSs = 5		>XP_006720506.1 MAX gene-associated protein isoform X1	5
>XP_011509314.1 protein unc-80 homolog isoform X19 [Homo sapiens]	common SCSs = 5		>XP_011509314.1 protein unc-80 homolog isoform X19	5
>XP_011510350.1 protein TANC1 isoform X2 [Homo sapiens]	common SCSs = 5		>XP_011510350.1 protein TANC1 isoform X2	5
>XP_011510353.1 protein TANC1 isoform X5 [Homo sapiens]	common SCSs = 5		>XP_011510353.1 protein TANC1 isoform X5	5
>XP_011510355.1 protein TANC1 isoform X5 [Homo sapiens]	common SCSs = 5		>XP_011510355.1 protein TANC1 isoform X5	5
>XP_011510357.1 protein TANC1 isoform X10 [Homo sapiens]	common SCSs = 5		>XP_011510357.1 protein TANC1 isoform X10	5
>XP_011510361.1 protein TANC1 isoform X19 [Homo sapiens]	common SCSs = 5		>XP_011510361.1 protein TANC1 isoform X19	5
>XP_011512982.1 fibrocystin isoform X1 [Homo sapiens]	common SCSs = 5		>XP_011512982.1 fibrocystin isoform X1	5
>XP_011512984.1 fibrocystin isoform X3 [Homo sapiens]	common SCSs = 5		>XP_011512984.1 fibrocystin isoform X3	5
>XP_011512985.1 fibrocystin isoform X6 [Homo sapiens]	common SCSs = 5		>XP_011512985.1 fibrocystin isoform X6	5
>XP_011512987.1 fibrocystin isoform X9 [Homo sapiens]	common SCSs = 5		>XP_011512987.1 fibrocystin isoform X9	5
>XP_011512988.1 fibrocystin isoform X11 [Homo sapiens]	common SCSs = 5		>XP_011512988.1 fibrocystin isoform X11	5
>XP_011512989.1 fibrocystin isoform X12 [Homo sapiens]	common SCSs = 5		>XP_011512989.1 fibrocystin isoform X12	5
>XP_011513328.1 dyslexia-associated protein KIAA0319 isoform X7 [Homo sapiens]	common SCSs = 5		>XP_011513328.1 dyslexia-associated protein KIAA0319 isoform X7	5
>XP_011513432.1 ATP-binding cassette sub-family A member 13 isoform X1 [Homo sapiens]	common SCSs = 5		>XP_011513432.1 ATP-binding cassette sub-family A member 13 isoform X1	5
>XP_011513433.1 ATP-binding cassette sub-family A member 13 isoform X2 [Homo sapiens]	common SCSs = 5		>XP_011513433.1 ATP-binding cassette sub-family A member 13 isoform X2	5
>XP_011513434.1 ATP-binding cassette sub-family A member 13 isoform X3 [Homo sapiens]	common SCSs = 5		>XP_011513434.1 ATP-binding cassette sub-family A member 13 isoform X3	5
>XP_011513435.1 ATP-binding cassette sub-family A member 13 isoform X4 [Homo sapiens]	common SCSs = 5		>XP_011513435.1 ATP-binding cassette sub-family A member 13 isoform X4	5
>XP_011513436.1 ATP-binding cassette sub-family A member 13 isoform X5 [Homo sapiens]	common SCSs = 5		>XP_011513436.1 ATP-binding cassette sub-family A member 13 isoform X5	5
>XP_011513439.1 ATP-binding cassette sub-family A member 13 isoform X7 [Homo sapiens]	common SCSs = 5		>XP_011513439.1 ATP-binding cassette sub-family A member 13 isoform X7	5
>XP_011515638.1 protein mono-ADP-ribosyltransferase PARP10 isoform X1 [Homo sapiens]	common SCSs = 5		>XP_011515638.1 protein mono-ADP-ribosyltransferase PARP10 isoform X1	5
>XP_011519408.1 coiled-coil domain-containing protein 168 isoform X1 [Homo sapiens]	common SCSs = 5		>XP_011519408.1 coiled-coil domain-containing protein 168 isoform X1	5
>XP_011519699.1 MAX gene-associated protein isoform X4 [Homo sapiens]	common SCSs = 5		>XP_011519699.1 MAX gene-associated protein isoform X4	5
>XP_011519700.1 MAX gene-associated protein isoform X5 [Homo sapiens]	common SCSs = 5		>XP_011519700.1 MAX gene-associated protein isoform X5	5
>XP_011520287.1 TP53-binding protein 1 isoform X1 [Homo sapiens]	common SCSs = 5		>XP_011520287.1 TP53-binding protein 1 isoform X1	5
>XP_011520288.1 TP53-binding protein 1 isoform X2 [Homo sapiens]	common SCSs = 5		>XP_011520288.1 TP53-binding protein 1 isoform X2	5
>XP_011522931.1 KAT8 regulatory NSL complex subunit 1 isoform X3 [Homo sapiens]	common SCSs = 5		>XP_011522931.1 KAT8 regulatory NSL complex subunit 1 isoform X3	5
>XP_011523718.1 dynein heavy chain 17, axonemal isoform X1 [Homo sapiens]	common SCSs = 5		>XP_011523718.1 dynein heavy chain 17, axonemal isoform X1	5
>XP_011523944.1 structural maintenance of chromosomes flexible hinge domain-containing protein 1 isoform X1 [Homo sapiens]	common SCSs = 5		>XP_011523944.1 structural maintenance of chromosomes flexible hinge domain-containing protein 1 isoform X1	5
>XP_011523945.1 structural maintenance of chromosomes flexible hinge domain-containing protein 1 isoform X2 [Homo sapiens]	common SCSs = 5		>XP_011523945.1 structural maintenance of chromosomes flexible hinge domain-containing protein 1 isoform X2	5
>XP_011524491.1 FH1/FH2 domain-containing protein 3 isoform X1 [Homo sapiens]	common SCSs = 5		>XP_011524491.1 FH1/FH2 domain-containing protein 3 isoform X1	5
>XP_011524492.1 FH1/FH2 domain-containing protein 3 isoform X2 [Homo sapiens]	common SCSs = 5		>XP_011524492.1 FH1/FH2 domain-containing protein 3 isoform X2	5
>XP_011524494.1 FH1/FH2 domain-containing protein 3 isoform X3 [Homo sapiens]	common SCSs = 5		>XP_011524494.1 FH1/FH2 domain-containing protein 3 isoform X3	5
>XP_011524495.1 FH1/FH2 domain-containing protein 3 isoform X4 [Homo sapiens]	common SCSs = 5		>XP_011524495.1 FH1/FH2 domain-containing protein 3 isoform X4	5
>XP_011524497.1 FH1/FH2 domain-containing protein 3 isoform X9 [Homo sapiens]	common SCSs = 5		>XP_011524497.1 FH1/FH2 domain-containing protein 3 isoform X9	5
>XP_011524499.1 FH1/FH2 domain-containing protein 3 isoform X16 [Homo sapiens]	common SCSs = 5		>XP_011524499.1 FH1/FH2 domain-containing protein 3 isoform X16	5
>XP_011531594.1 neural cell adhesion molecule L1-like protein isoform X1 [Homo sapiens]	common SCSs = 5		>XP_011531594.1 neural cell adhesion molecule L1-like protein isoform X1	5
>XP_011531596.1 neural cell adhesion molecule L1-like protein isoform X2 [Homo sapiens]	common SCSs = 5		>XP_011531596.1 neural cell adhesion molecule L1-like protein isoform X2	5
>XP_011531597.1 neural cell adhesion molecule L1-like protein isoform X2 [Homo sapiens]	common SCSs = 5		>XP_011531597.1 neural cell adhesion molecule L1-like protein isoform X2	5
>XP_011531598.1 neural cell adhesion molecule L1-like protein isoform X3 [Homo sapiens]	common SCSs = 5		>XP_011531598.1 neural cell adhesion molecule L1-like protein isoform X3	5
>XP_011532224.1 histone-lysine N-methyltransferase SETD5 isoform X2 [Homo sapiens]	common SCSs = 5		>XP_011532224.1 histone-lysine N-methyltransferase SETD5 isoform X2	5
>XP_011532230.1 histone-lysine N-methyltransferase SETD5 isoform X7 [Homo sapiens]	common SCSs = 5		>XP_011532230.1 histone-lysine N-methyltransferase SETD5 isoform X7	5
>XP_011532558.1 sodium bicarbonate cotransporter 3 isoform X2 [Homo sapiens]	common SCSs = 5		>XP_011532558.1 sodium bicarbonate cotransporter 3 isoform X2	5
>XP_011532560.1 sodium bicarbonate cotransporter 3 isoform X3 [Homo sapiens]	common SCSs = 5		>XP_011532560.1 sodium bicarbonate cotransporter 3 isoform X3	5
>XP_011532563.1 sodium bicarbonate cotransporter 3 isoform X4 [Homo sapiens]	common SCSs = 5		>XP_011532563.1 sodium bicarbonate cotransporter 3 isoform X4	5
>XP_011532565.1 sodium bicarbonate cotransporter 3 isoform X7 [Homo sapiens]	common SCSs = 5		>XP_011532565.1 sodium bicarbonate cotransporter 3 isoform X7	5
>XP_011532567.1 sodium bicarbonate cotransporter 3 isoform X10 [Homo sapiens]	common SCSs = 5		>XP_011532567.1 sodium bicarbonate cotransporter 3 isoform X10	5
>XP_011533095.1 golgin subfamily A member 3 isoform X3 [Homo sapiens]	common SCSs = 5		>XP_011533095.1 golgin subfamily A member 3 isoform X3	5
>XP_011533306.1 E3 ubiquitin-protein ligase MYCBP2 isoform X17 [Homo sapiens]	common SCSs = 5		>XP_011533306.1 E3 ubiquitin-protein ligase MYCBP2 isoform X17	5
>XP_011533307.1 E3 ubiquitin-protein ligase MYCBP2 isoform X28 [Homo sapiens]	common SCSs = 5		>XP_011533307.1 E3 ubiquitin-protein ligase MYCBP2 isoform X28	5
>XP_011534330.1 DNA polymerase zeta catalytic subunit isoform X1 [Homo sapiens]	common SCSs = 5		>XP_011534330.1 DNA polymerase zeta catalytic subunit isoform X1	5
>XP_011534331.1 DNA polymerase zeta catalytic subunit isoform X2 [Homo sapiens]	common SCSs = 5		>XP_011534331.1 DNA polymerase zeta catalytic subunit isoform X2	5
>XP_011534332.1 DNA polymerase zeta catalytic subunit isoform X3 [Homo sapiens]	common SCSs = 5		>XP_011534332.1 DNA polymerase zeta catalytic subunit isoform X3	5
>XP_011534333.1 DNA polymerase zeta catalytic subunit isoform X4 [Homo sapiens]	common SCSs = 5		>XP_011534333.1 DNA polymerase zeta catalytic subunit isoform X4	5
>XP_011534334.1 DNA polymerase zeta catalytic subunit isoform X4 [Homo sapiens]	common SCSs = 5		>XP_011534334.1 DNA polymerase zeta catalytic subunit isoform X4	5
>XP_011536913.1 nck-associated protein 5-like isoform X1 [Homo sapiens]	common SCSs = 5		>XP_011536913.1 nck-associated protein 5-like isoform X1	5
>XP_011537072.1 histone-lysine N-methyltransferase 2D isoform X1 [Homo sapiens]	common SCSs = 5		>XP_011537072.1 histone-lysine N-methyltransferase 2D isoform X1	5
>XP_011537073.1 histone-lysine N-methyltransferase 2D isoform X2 [Homo sapiens]	common SCSs = 5		>XP_011537073.1 histone-lysine N-methyltransferase 2D isoform X2	5
>XP_011537074.1 histone-lysine N-methyltransferase 2D isoform X3 [Homo sapiens]	common SCSs = 5		>XP_011537074.1 histone-lysine N-methyltransferase 2D isoform X3	5
>XP_011537075.1 histone-lysine N-methyltransferase 2D isoform X4 [Homo sapiens]	common SCSs = 5		>XP_011537075.1 histone-lysine N-methyltransferase 2D isoform X4	5
>XP_011537076.1 histone-lysine N-methyltransferase 2D isoform X5 [Homo sapiens]	common SCSs = 5		>XP_011537076.1 histone-lysine N-methyltransferase 2D isoform X5	5
>XP_011537078.1 histone-lysine N-methyltransferase 2D isoform X9 [Homo sapiens]	common SCSs = 5		>XP_011537078.1 histone-lysine N-methyltransferase 2D isoform X9	5
>XP_011538288.2 WD repeat- and FYVE domain-containing protein 4 isoform X1 [Homo sapiens]	common SCSs = 5		>XP_011538288.2 WD repeat- and FYVE domain-containing protein 4 isoform X1	5
>XP_011538289.2 WD repeat- and FYVE domain-containing protein 4 isoform X2 [Homo sapiens]	common SCSs = 5		>XP_011538289.2 WD repeat- and FYVE domain-containing protein 4 isoform X2	5
>XP_011538290.1 WD repeat- and FYVE domain-containing protein 4 isoform X3 [Homo sapiens]	common SCSs = 5		>XP_011538290.1 WD repeat- and FYVE domain-containing protein 4 isoform X3	5
>XP_011539416.2 E3 ubiquitin-protein ligase UBR4 isoform X7 [Homo sapiens]	common SCSs = 5		>XP_011539416.2 E3 ubiquitin-protein ligase UBR4 isoform X7	5
>XP_011539417.2 E3 ubiquitin-protein ligase UBR4 isoform X9 [Homo sapiens]	common SCSs = 5		>XP_011539417.2 E3 ubiquitin-protein ligase UBR4 isoform X9	5
>XP_011539422.2 E3 ubiquitin-protein ligase UBR4 isoform X18 [Homo sapiens]	common SCSs = 5		>XP_011539422.2 E3 ubiquitin-protein ligase UBR4 isoform X18	5
>XP_011539423.2 E3 ubiquitin-protein ligase UBR4 isoform X20 [Homo sapiens]	common SCSs = 5		>XP_011539423.2 E3 ubiquitin-protein ligase UBR4 isoform X20	5
>XP_011541131.1 histone-lysine N-methyltransferase 2A isoform X1 [Homo sapiens]	common SCSs = 5		>XP_011541131.1 histone-lysine N-methyltransferase 2A isoform X1	5
>XP_011541132.1 histone-lysine N-methyltransferase 2A isoform X2 [Homo sapiens]	common SCSs = 5		>XP_011541132.1 histone-lysine N-methyltransferase 2A isoform X2	5
>XP_011541133.1 histone-lysine N-methyltransferase 2A isoform X3 [Homo sapiens]	common SCSs = 5		>XP_011541133.1 histone-lysine N-methyltransferase 2A isoform X3	5
>XP_011541156.1 protein NPAT isoform X1 [Homo sapiens]	common SCSs = 5		>XP_011541156.1 protein NPAT isoform X1	5
>XP_011543235.1 teneurin-4 isoform X3 [Homo sapiens]	common SCSs = 5		>XP_011543235.1 teneurin-4 isoform X3	5
>XP_016856249.1 protein PRRC2C isoform X6 [Homo sapiens]	common SCSs = 5		>XP_016856249.1 protein PRRC2C isoform X6	5
>XP_016856250.1 protein PRRC2C isoform X9 [Homo sapiens]	common SCSs = 5		>XP_016856250.1 protein PRRC2C isoform X9	5
>XP_016856251.1 protein PRRC2C isoform X12 [Homo sapiens]	common SCSs = 5		>XP_016856251.1 protein PRRC2C isoform X12	5
>XP_016856311.2 E3 ubiquitin-protein ligase UBR4 isoform X8 [Homo sapiens]	common SCSs = 5		>XP_016856311.2 E3 ubiquitin-protein ligase UBR4 isoform X8	5
>XP_016856313.2 E3 ubiquitin-protein ligase UBR4 isoform X14 [Homo sapiens]	common SCSs = 5		>XP_016856313.2 E3 ubiquitin-protein ligase UBR4 isoform X14	5
>XP_016856315.2 E3 ubiquitin-protein ligase UBR4 isoform X16 [Homo sapiens]	common SCSs = 5		>XP_016856315.2 E3 ubiquitin-protein ligase UBR4 isoform X16	5
>XP_016856316.2 E3 ubiquitin-protein ligase UBR4 isoform X19 [Homo sapiens]	common SCSs = 5		>XP_016856316.2 E3 ubiquitin-protein ligase UBR4 isoform X19	5
>XP_016856317.2 E3 ubiquitin-protein ligase UBR4 isoform X21 [Homo sapiens]	common SCSs = 5		>XP_016856317.2 E3 ubiquitin-protein ligase UBR4 isoform X21	5
>XP_016856318.2 E3 ubiquitin-protein ligase UBR4 isoform X22 [Homo sapiens]	common SCSs = 5		>XP_016856318.2 E3 ubiquitin-protein ligase UBR4 isoform X22	5
>XP_016856319.2 E3 ubiquitin-protein ligase UBR4 isoform X23 [Homo sapiens]	common SCSs = 5		>XP_016856319.2 E3 ubiquitin-protein ligase UBR4 isoform X23	5
>XP_016856831.1 protein phosphatase 1 regulatory subunit 12B isoform X1 [Homo sapiens]	common SCSs = 5		>XP_016856831.1 protein phosphatase 1 regulatory subunit 12B isoform X1	5
>XP_016856832.1 protein phosphatase 1 regulatory subunit 12B isoform X2 [Homo sapiens]	common SCSs = 5		>XP_016856832.1 protein phosphatase 1 regulatory subunit 12B isoform X2	5
>XP_016856835.1 protein phosphatase 1 regulatory subunit 12B isoform X4 [Homo sapiens]	common SCSs = 5		>XP_016856835.1 protein phosphatase 1 regulatory subunit 12B isoform X4	5
>XP_016856836.1 protein phosphatase 1 regulatory subunit 12B isoform X5 [Homo sapiens]	common SCSs = 5		>XP_016856836.1 protein phosphatase 1 regulatory subunit 12B isoform X5	5
>XP_016859911.1 telomere-associated protein RIF1 isoform X2 [Homo sapiens]	common SCSs = 5		>XP_016859911.1 telomere-associated protein RIF1 isoform X2	5
>XP_016859912.1 telomere-associated protein RIF1 isoform X3 [Homo sapiens]	common SCSs = 5		>XP_016859912.1 telomere-associated protein RIF1 isoform X3	5
>XP_016859913.1 telomere-associated protein RIF1 isoform X4 [Homo sapiens]	common SCSs = 5		>XP_016859913.1 telomere-associated protein RIF1 isoform X4	5
>XP_016859914.1 telomere-associated protein RIF1 isoform X5 [Homo sapiens]	common SCSs = 5		>XP_016859914.1 telomere-associated protein RIF1 isoform X5	5
>XP_016860045.1 baculoviral IAP repeat-containing protein 6 isoform X8 [Homo sapiens]	common SCSs = 5		>XP_016860045.1 baculoviral IAP repeat-containing protein 6 isoform X8	5
>XP_016860046.1 baculoviral IAP repeat-containing protein 6 isoform X10 [Homo sapiens]	common SCSs = 5		>XP_016860046.1 baculoviral IAP repeat-containing protein 6 isoform X10	5
>XP_016860047.1 baculoviral IAP repeat-containing protein 6 isoform X13 [Homo sapiens]	common SCSs = 5		>XP_016860047.1 baculoviral IAP repeat-containing protein 6 isoform X13	5
>XP_016860048.1 baculoviral IAP repeat-containing protein 6 isoform X15 [Homo sapiens]	common SCSs = 5		>XP_016860048.1 baculoviral IAP repeat-containing protein 6 isoform X15	5
>XP_016860630.1 protein TANC1 isoform X1 [Homo sapiens]	common SCSs = 5		>XP_016860630.1 protein TANC1 isoform X1	5
>XP_016860631.1 protein TANC1 isoform X3 [Homo sapiens]	common SCSs = 5		>XP_016860631.1 protein TANC1 isoform X3	5
>XP_016860632.1 protein TANC1 isoform X3 [Homo sapiens]	common SCSs = 5		>XP_016860632.1 protein TANC1 isoform X3	5
>XP_016860633.1 protein TANC1 isoform X4 [Homo sapiens]	common SCSs = 5		>XP_016860633.1 protein TANC1 isoform X4	5
>XP_016860634.1 protein TANC1 isoform X5 [Homo sapiens]	common SCSs = 5		>XP_016860634.1 protein TANC1 isoform X5	5
>XP_016860635.1 protein TANC1 isoform X6 [Homo sapiens]	common SCSs = 5		>XP_016860635.1 protein TANC1 isoform X6	5
>XP_016860638.1 protein TANC1 isoform X9 [Homo sapiens]	common SCSs = 5		>XP_016860638.1 protein TANC1 isoform X9	5
>XP_016860639.1 protein TANC1 isoform X11 [Homo sapiens]	common SCSs = 5		>XP_016860639.1 protein TANC1 isoform X11	5
>XP_016860640.1 protein TANC1 isoform X13 [Homo sapiens]	common SCSs = 5		>XP_016860640.1 protein TANC1 isoform X13	5
>XP_016860641.1 protein TANC1 isoform X14 [Homo sapiens]	common SCSs = 5		>XP_016860641.1 protein TANC1 isoform X14	5
>XP_016860643.1 protein TANC1 isoform X16 [Homo sapiens]	common SCSs = 5		>XP_016860643.1 protein TANC1 isoform X16	5
>XP_016861055.1 neural cell adhesion molecule L1-like protein isoform X1 [Homo sapiens]	common SCSs = 5		>XP_016861055.1 neural cell adhesion molecule L1-like protein isoform X1	5
>XP_016861056.1 neural cell adhesion molecule L1-like protein isoform X1 [Homo sapiens]	common SCSs = 5		>XP_016861056.1 neural cell adhesion molecule L1-like protein isoform X1	5
>XP_016861057.1 neural cell adhesion molecule L1-like protein isoform X1 [Homo sapiens]	common SCSs = 5		>XP_016861057.1 neural cell adhesion molecule L1-like protein isoform X1	5
>XP_016861058.1 neural cell adhesion molecule L1-like protein isoform X2 [Homo sapiens]	common SCSs = 5		>XP_016861058.1 neural cell adhesion molecule L1-like protein isoform X2	5
>XP_016861059.1 neural cell adhesion molecule L1-like protein isoform X2 [Homo sapiens]	common SCSs = 5		>XP_016861059.1 neural cell adhesion molecule L1-like protein isoform X2	5
>XP_016861060.1 neural cell adhesion molecule L1-like protein isoform X2 [Homo sapiens]	common SCSs = 5		>XP_016861060.1 neural cell adhesion molecule L1-like protein isoform X2	5
>XP_016861061.1 neural cell adhesion molecule L1-like protein isoform X3 [Homo sapiens]	common SCSs = 5		>XP_016861061.1 neural cell adhesion molecule L1-like protein isoform X3	5
>XP_016861062.1 neural cell adhesion molecule L1-like protein isoform X3 [Homo sapiens]	common SCSs = 5		>XP_016861062.1 neural cell adhesion molecule L1-like protein isoform X3	5
>XP_016862257.1 histone-lysine N-methyltransferase SETD5 isoform X2 [Homo sapiens]	common SCSs = 5		>XP_016862257.1 histone-lysine N-methyltransferase SETD5 isoform X2	5
>XP_016862260.1 histone-lysine N-methyltransferase SETD5 isoform X6 [Homo sapiens]	common SCSs = 5		>XP_016862260.1 histone-lysine N-methyltransferase SETD5 isoform X6	5
>XP_016862263.1 histone-lysine N-methyltransferase SETD5 isoform X11 [Homo sapiens]	common SCSs = 5		>XP_016862263.1 histone-lysine N-methyltransferase SETD5 isoform X11	5
>XP_016863015.1 sodium bicarbonate cotransporter 3 isoform X5 [Homo sapiens]	common SCSs = 5		>XP_016863015.1 sodium bicarbonate cotransporter 3 isoform X5	5
>XP_016863016.1 sodium bicarbonate cotransporter 3 isoform X8 [Homo sapiens]	common SCSs = 5		>XP_016863016.1 sodium bicarbonate cotransporter 3 isoform X8	5
>XP_016864187.1 transmembrane protein KIAA1109 isoform X15 [Homo sapiens]	common SCSs = 5		>XP_016864187.1 transmembrane protein KIAA1109 isoform X15	5
>XP_016864188.1 transmembrane protein KIAA1109 isoform X16 [Homo sapiens]	common SCSs = 5		>XP_016864188.1 transmembrane protein KIAA1109 isoform X16	5
>XP_016866433.1 fibrocystin isoform X1 [Homo sapiens]	common SCSs = 5		>XP_016866433.1 fibrocystin isoform X1	5
>XP_016866434.1 fibrocystin isoform X2 [Homo sapiens]	common SCSs = 5		>XP_016866434.1 fibrocystin isoform X2	5
>XP_016866435.1 fibrocystin isoform X4 [Homo sapiens]	common SCSs = 5		>XP_016866435.1 fibrocystin isoform X4	5
>XP_016866436.1 fibrocystin isoform X5 [Homo sapiens]	common SCSs = 5		>XP_016866436.1 fibrocystin isoform X5	5
>XP_016866439.1 fibrocystin isoform X10 [Homo sapiens]	common SCSs = 5		>XP_016866439.1 fibrocystin isoform X10	5
>XP_016866641.1 DNA polymerase zeta catalytic subunit isoform X5 [Homo sapiens]	common SCSs = 5		>XP_016866641.1 DNA polymerase zeta catalytic subunit isoform X5	5
>XP_016866642.1 DNA polymerase zeta catalytic subunit isoform X5 [Homo sapiens]	common SCSs = 5		>XP_016866642.1 DNA polymerase zeta catalytic subunit isoform X5	5
>XP_016866643.1 DNA polymerase zeta catalytic subunit isoform X5 [Homo sapiens]	common SCSs = 5		>XP_016866643.1 DNA polymerase zeta catalytic subunit isoform X5	5
>XP_016867030.1 dyslexia-associated protein KIAA0319 isoform X1 [Homo sapiens]	common SCSs = 5		>XP_016867030.1 dyslexia-associated protein KIAA0319 isoform X1	5
>XP_016867031.1 dyslexia-associated protein KIAA0319 isoform X2 [Homo sapiens]	common SCSs = 5		>XP_016867031.1 dyslexia-associated protein KIAA0319 isoform X2	5
>XP_016867033.1 dyslexia-associated protein KIAA0319 isoform X3 [Homo sapiens]	common SCSs = 5		>XP_016867033.1 dyslexia-associated protein KIAA0319 isoform X3	5
>XP_016867035.1 dyslexia-associated protein KIAA0319 isoform X4 [Homo sapiens]	common SCSs = 5		>XP_016867035.1 dyslexia-associated protein KIAA0319 isoform X4	5
>XP_016867036.1 dyslexia-associated protein KIAA0319 isoform X5 [Homo sapiens]	common SCSs = 5		>XP_016867036.1 dyslexia-associated protein KIAA0319 isoform X5	5
>XP_016867039.1 dyslexia-associated protein KIAA0319 isoform X5 [Homo sapiens]	common SCSs = 5		>XP_016867039.1 dyslexia-associated protein KIAA0319 isoform X5	5
>XP_016867040.1 dyslexia-associated protein KIAA0319 isoform X6 [Homo sapiens]	common SCSs = 5		>XP_016867040.1 dyslexia-associated protein KIAA0319 isoform X6	5
>XP_016870741.1 multiple PDZ domain protein isoform X2 [Homo sapiens]	common SCSs = 5		>XP_016870741.1 multiple PDZ domain protein isoform X2	5
>XP_016870742.1 multiple PDZ domain protein isoform X5 [Homo sapiens]	common SCSs = 5		>XP_016870742.1 multiple PDZ domain protein isoform X5	5
>XP_016871952.1 WD repeat- and FYVE domain-containing protein 4 isoform X3 [Homo sapiens]	common SCSs = 5		>XP_016871952.1 WD repeat- and FYVE domain-containing protein 4 isoform X3	5
>XP_016872565.1 homeodomain-interacting protein kinase 3 isoform X1 [Homo sapiens]	common SCSs = 5		>XP_016872565.1 homeodomain-interacting protein kinase 3 isoform X1	5
>XP_016873014.1 teneurin-4 isoform X1 [Homo sapiens]	common SCSs = 5		>XP_016873014.1 teneurin-4 isoform X1	5
>XP_016873015.1 teneurin-4 isoform X2 [Homo sapiens]	common SCSs = 5		>XP_016873015.1 teneurin-4 isoform X2	5
>XP_016873291.1 protein NPAT isoform X2 [Homo sapiens]	common SCSs = 5		>XP_016873291.1 protein NPAT isoform X2	5
>XP_016873292.1 protein NPAT isoform X2 [Homo sapiens]	common SCSs = 5		>XP_016873292.1 protein NPAT isoform X2	5
>XP_016874530.1 protein MON2 homolog isoform X1 [Homo sapiens]	common SCSs = 5		>XP_016874530.1 protein MON2 homolog isoform X1	5
>XP_016874531.1 protein MON2 homolog isoform X2 [Homo sapiens]	common SCSs = 5		>XP_016874531.1 protein MON2 homolog isoform X2	5
>XP_016874571.1 WASH complex subunit 4 isoform X3 [Homo sapiens]	common SCSs = 5		>XP_016874571.1 WASH complex subunit 4 isoform X3	5
>XP_016874758.1 inositol 1,4,5-trisphosphate receptor type 2 isoform X3 [Homo sapiens]	common SCSs = 5		>XP_016874758.1 inositol 1,4,5-trisphosphate receptor type 2 isoform X3	5
>XP_016875943.1 E3 ubiquitin-protein ligase MYCBP2 isoform X4 [Homo sapiens]	common SCSs = 5		>XP_016875943.1 E3 ubiquitin-protein ligase MYCBP2 isoform X4	5
>XP_016875944.1 E3 ubiquitin-protein ligase MYCBP2 isoform X9 [Homo sapiens]	common SCSs = 5		>XP_016875944.1 E3 ubiquitin-protein ligase MYCBP2 isoform X9	5
>XP_016875949.1 E3 ubiquitin-protein ligase MYCBP2 isoform X19 [Homo sapiens]	common SCSs = 5		>XP_016875949.1 E3 ubiquitin-protein ligase MYCBP2 isoform X19	5
>XP_016875957.1 E3 ubiquitin-protein ligase MYCBP2 isoform X27 [Homo sapiens]	common SCSs = 5		>XP_016875957.1 E3 ubiquitin-protein ligase MYCBP2 isoform X27	5
>XP_016876585.1 pecanex-like protein 1 isoform X7 [Homo sapiens]	common SCSs = 5		>XP_016876585.1 pecanex-like protein 1 isoform X7	5
>XP_016876586.1 pecanex-like protein 1 isoform X11 [Homo sapiens]	common SCSs = 5		>XP_016876586.1 pecanex-like protein 1 isoform X11	5
>XP_016878526.1 NLR family CARD domain-containing protein 3 isoform X2 [Homo sapiens]	common SCSs = 5		>XP_016878526.1 NLR family CARD domain-containing protein 3 isoform X2	5
>XP_016878527.1 NLR family CARD domain-containing protein 3 isoform X3 [Homo sapiens]	common SCSs = 5		>XP_016878527.1 NLR family CARD domain-containing protein 3 isoform X3	5
>XP_016879273.1 zinc finger protein 469 isoform X1 [Homo sapiens]	common SCSs = 5		>XP_016879273.1 zinc finger protein 469 isoform X1	5
>XP_016879978.1 KAT8 regulatory NSL complex subunit 1 isoform X6 [Homo sapiens]	common SCSs = 5		>XP_016879978.1 KAT8 regulatory NSL complex subunit 1 isoform X6	5
>XP_016881173.1 structural maintenance of chromosomes flexible hinge domain-containing protein 1 isoform X3 [Homo sapiens]	common SCSs = 5		>XP_016881173.1 structural maintenance of chromosomes flexible hinge domain-containing protein 1 isoform X3	5
>XP_016881495.1 FH1/FH2 domain-containing protein 3 isoform X5 [Homo sapiens]	common SCSs = 5		>XP_016881495.1 FH1/FH2 domain-containing protein 3 isoform X5	5
>XP_016881496.1 FH1/FH2 domain-containing protein 3 isoform X7 [Homo sapiens]	common SCSs = 5		>XP_016881496.1 FH1/FH2 domain-containing protein 3 isoform X7	5
>XP_016881497.1 FH1/FH2 domain-containing protein 3 isoform X8 [Homo sapiens]	common SCSs = 5		>XP_016881497.1 FH1/FH2 domain-containing protein 3 isoform X8	5
>XP_016881499.1 FH1/FH2 domain-containing protein 3 isoform X15 [Homo sapiens]	common SCSs = 5		>XP_016881499.1 FH1/FH2 domain-containing protein 3 isoform X15	5
>XP_016884695.1 E3 ubiquitin-protein ligase HUWE1 isoform X12 [Homo sapiens]	common SCSs = 5		>XP_016884695.1 E3 ubiquitin-protein ligase HUWE1 isoform X12	5
>XP_024303476.1 multiple PDZ domain protein isoform X1 [Homo sapiens]	common SCSs = 5		>XP_024303476.1 multiple PDZ domain protein isoform X1	5
>XP_024304707.1 golgin subfamily A member 3 isoform X1 [Homo sapiens]	common SCSs = 5		>XP_024304707.1 golgin subfamily A member 3 isoform X1	5
>XP_024304708.1 golgin subfamily A member 3 isoform X1 [Homo sapiens]	common SCSs = 5		>XP_024304708.1 golgin subfamily A member 3 isoform X1	5
>XP_024304709.1 golgin subfamily A member 3 isoform X1 [Homo sapiens]	common SCSs = 5		>XP_024304709.1 golgin subfamily A member 3 isoform X1	5
>XP_024304710.1 golgin subfamily A member 3 isoform X1 [Homo sapiens]	common SCSs = 5		>XP_024304710.1 golgin subfamily A member 3 isoform X1	5
>XP_024304711.1 golgin subfamily A member 3 isoform X2 [Homo sapiens]	common SCSs = 5		>XP_024304711.1 golgin subfamily A member 3 isoform X2	5
>XP_024305281.1 pecanex-like protein 1 isoform X9 [Homo sapiens]	common SCSs = 5		>XP_024305281.1 pecanex-like protein 1 isoform X9	5
>XP_024306781.1 dynein heavy chain 17, axonemal isoform X2 [Homo sapiens]	common SCSs = 5		>XP_024306781.1 dynein heavy chain 17, axonemal isoform X2	5
>XP_024307036.1 FH1/FH2 domain-containing protein 3 isoform X13 [Homo sapiens]	common SCSs = 5		>XP_024307036.1 FH1/FH2 domain-containing protein 3 isoform X13	5
>XP_024308740.1 telomere-associated protein RIF1 isoform X2 [Homo sapiens]	common SCSs = 5		>XP_024308740.1 telomere-associated protein RIF1 isoform X2	5
>XP_024308961.1 protein TANC1 isoform X17 [Homo sapiens]	common SCSs = 5		>XP_024308961.1 protein TANC1 isoform X17	5
>NP_000018.2 N(4)-(beta-N-acetylglucosaminyl)-L-asparaginase isoform 1 preproprotein [Homo sapiens]	common SCSs = 4		>NP_000018.2 N(4)-(beta-N-acetylglucosaminyl)-L-asparaginase isoform 1 preproprotein	4
>NP_000186.2 Hermansky-Pudlak syndrome 1 protein isoform a [Homo sapiens]	common SCSs = 4		>NP_000186.2 Hermansky-Pudlak syndrome 1 protein isoform a	4
>NP_000417.3 laminin subunit alpha-2 isoform a precursor [Homo sapiens]	common SCSs = 4		>NP_000417.3 laminin subunit alpha-2 isoform a precursor	4
>NP_000817.5 glutamate receptor 2 isoform 1 precursor [Homo sapiens]	common SCSs = 4		>NP_000817.5 glutamate receptor 2 isoform 1 precursor	4
>NP_000818.2 glutamate receptor 1 isoform 1 precursor [Homo sapiens]	common SCSs = 4		>NP_000818.2 glutamate receptor 1 isoform 1 precursor	4
>NP_000819.4 glutamate receptor 3 isoform 2 precursor [Homo sapiens]	common SCSs = 4		>NP_000819.4 glutamate receptor 3 isoform 2 precursor	4
>NP_000820.4 glutamate receptor 4 isoform 1 precursor [Homo sapiens]	common SCSs = 4		>NP_000820.4 glutamate receptor 4 isoform 1 precursor	4
>NP_000871.1 interleukin-7 isoform 1 precursor [Homo sapiens]	common SCSs = 4		>NP_000871.1 interleukin-7 isoform 1 precursor	4
>NP_001002838.1 serine/threonine-protein kinase WNK3 isoform 2 [Homo sapiens]	common SCSs = 4		>NP_001002838.1 serine/threonine-protein kinase WNK3 isoform 2	4
>NP_001004356.1 fibroblast growth factor receptor-like 1 precursor [Homo sapiens]	common SCSs = 4		>NP_001004356.1 fibroblast growth factor receptor-like 1 precursor	4
>NP_001004358.1 fibroblast growth factor receptor-like 1 precursor [Homo sapiens]	common SCSs = 4		>NP_001004358.1 fibroblast growth factor receptor-like 1 precursor	4
>NP_001004416.2 uromodulin-like 1 isoform 1 precursor [Homo sapiens]	common SCSs = 4		>NP_001004416.2 uromodulin-like 1 isoform 1 precursor	4
>NP_001005271.2 chromodomain-helicase-DNA-binding protein 3 isoform 3 [Homo sapiens]	common SCSs = 4		>NP_001005271.2 chromodomain-helicase-DNA-binding protein 3 isoform 3	4
>NP_001005273.1 chromodomain-helicase-DNA-binding protein 3 isoform 1 [Homo sapiens]	common SCSs = 4		>NP_001005273.1 chromodomain-helicase-DNA-binding protein 3 isoform 1	4
>NP_001005751.1 WASH complex subunit 2A isoform 1 [Homo sapiens]	common SCSs = 4		>NP_001005751.1 WASH complex subunit 2A isoform 1	4
>NP_001008781.2 protocadherin Fat 3 isoform 2 precursor [Homo sapiens]	common SCSs = 4		>NP_001008781.2 protocadherin Fat 3 isoform 2 precursor	4
>NP_001009954.1 DNA excision repair protein ERCC-6-like isoform b [Homo sapiens]	common SCSs = 4		>NP_001009954.1 DNA excision repair protein ERCC-6-like isoform b	4
>NP_001013049.1 VPS10 domain-containing receptor SorCS1 isoform b precursor [Homo sapiens]	common SCSs = 4		>NP_001013049.1 VPS10 domain-containing receptor SorCS1 isoform b precursor	4
>NP_001018125.1 Fanconi anemia group D2 protein isoform b [Homo sapiens]	common SCSs = 4		>NP_001018125.1 Fanconi anemia group D2 protein isoform b	4
>NP_001019554.1 neuron navigator 3 isoform 1 [Homo sapiens]	common SCSs = 4		>NP_001019554.1 neuron navigator 3 isoform 1	4
>NP_001025053.1 AT-hook DNA-binding motif-containing protein 1 [Homo sapiens]	common SCSs = 4		>NP_001025053.1 AT-hook DNA-binding motif-containing protein 1	4
>NP_001030126.2 sorbin and SH3 domain-containing protein 1 isoform 3 [Homo sapiens]	common SCSs = 4		>NP_001030126.2 sorbin and SH3 domain-containing protein 1 isoform 3	4
>NP_001032412.2 helicase with zinc finger domain 2 isoform 1 [Homo sapiens]	common SCSs = 4		>NP_001032412.2 helicase with zinc finger domain 2 isoform 1	4
>NP_001033.1 solute carrier family 2, facilitated glucose transporter member 4 [Homo sapiens]	common SCSs = 4		>NP_001033.1 solute carrier family 2, facilitated glucose transporter member 4	4
>NP_001035544.1 solute carrier family 26 member 6 isoform 4 [Homo sapiens]	common SCSs = 4		>NP_001035544.1 solute carrier family 26 member 6 isoform 4	4
>NP_001070711.3 glutamate receptor 4 isoform 2 precursor [Homo sapiens]	common SCSs = 4		>NP_001070711.3 glutamate receptor 4 isoform 2 precursor	4
>NP_001070729.2 nuclear receptor corepressor 2 isoform 2 [Homo sapiens]	common SCSs = 4		>NP_001070729.2 nuclear receptor corepressor 2 isoform 2	4
>NP_001072.2 cubilin precursor [Homo sapiens]	common SCSs = 4		>NP_001072.2 cubilin precursor	4
>NP_001073291.2 laminin subunit alpha-2 isoform b precursor [Homo sapiens]	common SCSs = 4		>NP_001073291.2 laminin subunit alpha-2 isoform b precursor	4
>NP_001074010.2 MAX gene-associated protein isoform 2 [Homo sapiens]	common SCSs = 4		>NP_001074010.2 MAX gene-associated protein isoform 2	4
>NP_001077086.1 RB1-inducible coiled-coil protein 1 isoform 2 [Homo sapiens]	common SCSs = 4		>NP_001077086.1 RB1-inducible coiled-coil protein 1 isoform 2	4
>NP_001077088.2 glutamate receptor 2 isoform 2 precursor [Homo sapiens]	common SCSs = 4		>NP_001077088.2 glutamate receptor 2 isoform 2 precursor	4
>NP_001077089.2 glutamate receptor 2 isoform 3 [Homo sapiens]	common SCSs = 4		>NP_001077089.2 glutamate receptor 2 isoform 3	4
>NP_001091868.1 coatomer subunit alpha isoform 1 [Homo sapiens]	common SCSs = 4		>NP_001091868.1 coatomer subunit alpha isoform 1	4
>NP_001094058.1 roquin-2 isoform 1 [Homo sapiens]	common SCSs = 4		>NP_001094058.1 roquin-2 isoform 1	4
>NP_001094348.1 maestro heat-like repeat-containing protein family member 6 [Homo sapiens]	common SCSs = 4		>NP_001094348.1 maestro heat-like repeat-containing protein family member 6	4
>NP_001098676.2 laminin subunit alpha-4 isoform 1 precursor [Homo sapiens]	common SCSs = 4		>NP_001098676.2 laminin subunit alpha-4 isoform 1 precursor	4
>NP_001098677.2 laminin subunit alpha-4 isoform 2 precursor [Homo sapiens]	common SCSs = 4		>NP_001098677.2 laminin subunit alpha-4 isoform 2 precursor	4
>NP_001104488.1 neuron navigator 2 isoform 3 [Homo sapiens]	common SCSs = 4		>NP_001104488.1 neuron navigator 2 isoform 3	4
>NP_001107655.1 glutamate receptor 1 isoform 2 precursor [Homo sapiens]	common SCSs = 4		>NP_001107655.1 glutamate receptor 1 isoform 2 precursor	4
>NP_001108410.2 coiled-coil domain-containing protein 17 isoform 1 [Homo sapiens]	common SCSs = 4		>NP_001108410.2 coiled-coil domain-containing protein 17 isoform 1	4
>NP_001121189.2 laminin subunit alpha-3 isoform 3 precursor [Homo sapiens]	common SCSs = 4		>NP_001121189.2 laminin subunit alpha-3 isoform 3 precursor	4
>NP_001121687.1 lipase member M precursor [Homo sapiens]	common SCSs = 4		>NP_001121687.1 lipase member M precursor	4
>NP_001124330.1 inositol hexakisphosphate and diphosphoinositol-pentakisphosphate kinase 1 isoform 5 [Homo sapiens]	common SCSs = 4		>NP_001124330.1 inositol hexakisphosphate and diphosphoinositol-pentakisphosphate kinase 1 isoform 5	4
>NP_001124331.1 inositol hexakisphosphate and diphosphoinositol-pentakisphosphate kinase 1 isoform 2 [Homo sapiens]	common SCSs = 4		>NP_001124331.1 inositol hexakisphosphate and diphosphoinositol-pentakisphosphate kinase 1 isoform 2	4
>NP_001136272.1 protein eyes shut homolog isoform 1 precursor [Homo sapiens]	common SCSs = 4		>NP_001136272.1 protein eyes shut homolog isoform 1 precursor	4
>NP_001137475.1 SLIT and NTRK-like protein 2 precursor [Homo sapiens]	common SCSs = 4		>NP_001137475.1 SLIT and NTRK-like protein 2 precursor	4
>NP_001137476.1 SLIT and NTRK-like protein 2 precursor [Homo sapiens]	common SCSs = 4		>NP_001137476.1 SLIT and NTRK-like protein 2 precursor	4
>NP_001137477.1 SLIT and NTRK-like protein 2 precursor [Homo sapiens]	common SCSs = 4		>NP_001137477.1 SLIT and NTRK-like protein 2 precursor	4
>NP_001137478.1 SLIT and NTRK-like protein 2 precursor [Homo sapiens]	common SCSs = 4		>NP_001137478.1 SLIT and NTRK-like protein 2 precursor	4
>NP_001137480.1 SLIT and NTRK-like protein 2 precursor [Homo sapiens]	common SCSs = 4		>NP_001137480.1 SLIT and NTRK-like protein 2 precursor	4
>NP_001137481.1 SLIT and NTRK-like protein 2 precursor [Homo sapiens]	common SCSs = 4		>NP_001137481.1 SLIT and NTRK-like protein 2 precursor	4
>NP_001137482.1 SLIT and NTRK-like protein 2 precursor [Homo sapiens]	common SCSs = 4		>NP_001137482.1 SLIT and NTRK-like protein 2 precursor	4
>NP_001137532.1 NHS-like protein 1 isoform 2 [Homo sapiens]	common SCSs = 4		>NP_001137532.1 NHS-like protein 1 isoform 2	4
>NP_001138424.1 protein sidekick-2 precursor [Homo sapiens]	common SCSs = 4		>NP_001138424.1 protein sidekick-2 precursor	4
>NP_001138678.1 uncharacterized protein KIAA1671 [Homo sapiens]	common SCSs = 4		>NP_001138678.1 uncharacterized protein KIAA1671	4
>NP_001138887.1 histone-lysine N-methyltransferase SETDB1 isoform 1 [Homo sapiens]	common SCSs = 4		>NP_001138887.1 histone-lysine N-methyltransferase SETDB1 isoform 1	4
>NP_001155155.1 otoancorin isoform 3 [Homo sapiens]	common SCSs = 4		>NP_001155155.1 otoancorin isoform 3	4
>NP_001157745.1 MAX gene-associated protein isoform 1 [Homo sapiens]	common SCSs = 4		>NP_001157745.1 MAX gene-associated protein isoform 1	4
>NP_001157979.1 nebulin isoform 1 [Homo sapiens]	common SCSs = 4		>NP_001157979.1 nebulin isoform 1	4
>NP_001157980.2 nebulin isoform 2 [Homo sapiens]	common SCSs = 4		>NP_001157980.2 nebulin isoform 2	4
>NP_001159719.1 glutamate receptor ionotropic, kainate 2 isoform 3 precursor [Homo sapiens]	common SCSs = 4		>NP_001159719.1 glutamate receptor ionotropic, kainate 2 isoform 3 precursor	4
>NP_001161328.1 protein strawberry notch homolog 1 isoform 1 [Homo sapiens]	common SCSs = 4		>NP_001161328.1 protein strawberry notch homolog 1 isoform 1	4
>NP_001161832.1 protocadherin-11 X-linked isoform e precursor [Homo sapiens]	common SCSs = 4		>NP_001161832.1 protocadherin-11 X-linked isoform e precursor	4
>NP_001161834.1 protocadherin-11 X-linked isoform g precursor [Homo sapiens]	common SCSs = 4		>NP_001161834.1 protocadherin-11 X-linked isoform g precursor	4
>NP_001161835.1 protocadherin-11 X-linked isoform h precursor [Homo sapiens]	common SCSs = 4		>NP_001161835.1 protocadherin-11 X-linked isoform h precursor	4
>NP_001164100.1 chromodomain-helicase-DNA-binding protein 8 isoform 1 [Homo sapiens]	common SCSs = 4		>NP_001164100.1 chromodomain-helicase-DNA-binding protein 8 isoform 1	4
>NP_001165459.1 N(4)-(beta-N-acetylglucosaminyl)-L-asparaginase isoform 2 precursor [Homo sapiens]	common SCSs = 4		>NP_001165459.1 N(4)-(beta-N-acetylglucosaminyl)-L-asparaginase isoform 2 precursor	4
>NP_001166028.1 golgin subfamily A member 3 isoform 2 [Homo sapiens]	common SCSs = 4		>NP_001166028.1 golgin subfamily A member 3 isoform 2	4
>NP_001177111.1 coiled-coil domain-containing protein 17 isoform 2 [Homo sapiens]	common SCSs = 4		>NP_001177111.1 coiled-coil domain-containing protein 17 isoform 2	4
>NP_001177143.1 inositol hexakisphosphate and diphosphoinositol-pentakisphosphate kinase 1 isoform 6 [Homo sapiens]	common SCSs = 4		>NP_001177143.1 inositol hexakisphosphate and diphosphoinositol-pentakisphosphate kinase 1 isoform 6	4
>NP_001177369.1 nuclear receptor corepressor 1 isoform 3 [Homo sapiens]	common SCSs = 4		>NP_001177369.1 nuclear receptor corepressor 1 isoform 3	4
>NP_001186456.2 uromodulin-like 1 isoform 3 [Homo sapiens]	common SCSs = 4		>NP_001186456.2 uromodulin-like 1 isoform 3	4
>NP_001186457.3 uromodulin-like 1 isoform 4 [Homo sapiens]	common SCSs = 4		>NP_001186457.3 uromodulin-like 1 isoform 4	4
>NP_001186815.1 interleukin-7 isoform 2 precursor [Homo sapiens]	common SCSs = 4		>NP_001186815.1 interleukin-7 isoform 2 precursor	4
>NP_001186816.1 interleukin-7 isoform 3 precursor [Homo sapiens]	common SCSs = 4		>NP_001186816.1 interleukin-7 isoform 3 precursor	4
>NP_001186817.1 interleukin-7 isoform 4 precursor [Homo sapiens]	common SCSs = 4		>NP_001186817.1 interleukin-7 isoform 4 precursor	4
>NP_001191354.2 BIVM-ERCC5 protein [Homo sapiens]	common SCSs = 4		>NP_001191354.2 BIVM-ERCC5 protein	4
>NP_001193498.1 VPS10 domain-containing receptor SorCS1 isoform c precursor [Homo sapiens]	common SCSs = 4		>NP_001193498.1 VPS10 domain-containing receptor SorCS1 isoform c precursor	4
>NP_001193499.1 VPS10 domain-containing receptor SorCS1 isoform d precursor [Homo sapiens]	common SCSs = 4		>NP_001193499.1 VPS10 domain-containing receptor SorCS1 isoform d precursor	4
>NP_001193500.1 VPS10 domain-containing receptor SorCS1 isoform e precursor [Homo sapiens]	common SCSs = 4		>NP_001193500.1 VPS10 domain-containing receptor SorCS1 isoform e precursor	4
>NP_001193501.1 VPS10 domain-containing receptor SorCS1 isoform f precursor [Homo sapiens]	common SCSs = 4		>NP_001193501.1 VPS10 domain-containing receptor SorCS1 isoform f precursor	4
>NP_001193583.1 nuclear receptor corepressor 2 isoform 3 [Homo sapiens]	common SCSs = 4		>NP_001193583.1 nuclear receptor corepressor 2 isoform 3	4
>NP_001231892.1 neuron navigator 2 isoform 5 [Homo sapiens]	common SCSs = 4		>NP_001231892.1 neuron navigator 2 isoform 5	4
>NP_001244948.1 glutamate receptor 1 isoform 3 precursor [Homo sapiens]	common SCSs = 4		>NP_001244948.1 glutamate receptor 1 isoform 3 precursor	4
>NP_001244949.1 glutamate receptor 1 isoform 4 [Homo sapiens]	common SCSs = 4		>NP_001244949.1 glutamate receptor 1 isoform 4	4
>NP_001244950.1 glutamate receptor 1 isoform 5 [Homo sapiens]	common SCSs = 4		>NP_001244950.1 glutamate receptor 1 isoform 5	4
>NP_001244951.1 glutamate receptor 1 isoform 6 [Homo sapiens]	common SCSs = 4		>NP_001244951.1 glutamate receptor 1 isoform 6	4
>NP_001244952.1 glutamate receptor 1 isoform 7 [Homo sapiens]	common SCSs = 4		>NP_001244952.1 glutamate receptor 1 isoform 7	4
>NP_001257449.1 disheveled-associated activator of morphogenesis 1 isoform 2 [Homo sapiens]	common SCSs = 4		>NP_001257449.1 disheveled-associated activator of morphogenesis 1 isoform 2	4
>NP_001257903.1 hydrocephalus-inducing protein homolog isoform a [Homo sapiens]	common SCSs = 4		>NP_001257903.1 hydrocephalus-inducing protein homolog isoform a	4
>NP_001258137.2 nebulin isoform 4 [Homo sapiens]	common SCSs = 4		>NP_001258137.2 nebulin isoform 4	4
>NP_001258572.1 thyroid adenoma-associated protein isoform b [Homo sapiens]	common SCSs = 4		>NP_001258572.1 thyroid adenoma-associated protein isoform b	4
>NP_001258573.1 thyroid adenoma-associated protein isoform c [Homo sapiens]	common SCSs = 4		>NP_001258573.1 thyroid adenoma-associated protein isoform c	4
>NP_001258875.2 slit homolog 3 protein isoform 1 precursor [Homo sapiens]	common SCSs = 4		>NP_001258875.2 slit homolog 3 protein isoform 1 precursor	4
>NP_001264044.1 dynein heavy chain 11, axonemal [Homo sapiens]	common SCSs = 4		>NP_001264044.1 dynein heavy chain 11, axonemal	4
>NP_001264992.1 SKI family transcriptional corepressor 2 isoform 1 [Homo sapiens]	common SCSs = 4		>NP_001264992.1 SKI family transcriptional corepressor 2 isoform 1	4
>NP_001265401.1 protein MON2 homolog isoform 5 [Homo sapiens]	common SCSs = 4		>NP_001265401.1 protein MON2 homolog isoform 5	4
>NP_001265845.1 elastin isoform j precursor [Homo sapiens]	common SCSs = 4		>NP_001265845.1 elastin isoform j precursor	4
>NP_001268661.1 solute carrier family 26 member 6 isoform 5 [Homo sapiens]	common SCSs = 4		>NP_001268661.1 solute carrier family 26 member 6 isoform 5	4
>NP_001268662.1 solute carrier family 26 member 6 isoform 6 [Homo sapiens]	common SCSs = 4		>NP_001268662.1 solute carrier family 26 member 6 isoform 6	4
>NP_001268668.1 FH1/FH2 domain-containing protein 3 isoform 2 [Homo sapiens]	common SCSs = 4		>NP_001268668.1 FH1/FH2 domain-containing protein 3 isoform 2	4
>NP_001271174.1 signal-induced proliferation-associated 1-like protein 1 isoform 2 [Homo sapiens]	common SCSs = 4		>NP_001271174.1 signal-induced proliferation-associated 1-like protein 1 isoform 2	4
>NP_001271175.1 signal-induced proliferation-associated 1-like protein 1 isoform 3 [Homo sapiens]	common SCSs = 4		>NP_001271175.1 signal-induced proliferation-associated 1-like protein 1 isoform 3	4
>NP_001271176.1 signal-induced proliferation-associated 1-like protein 1 isoform 4 [Homo sapiens]	common SCSs = 4		>NP_001271176.1 signal-induced proliferation-associated 1-like protein 1 isoform 4	4
>NP_001271230.1 anillin isoform 2 [Homo sapiens]	common SCSs = 4		>NP_001271230.1 anillin isoform 2	4
>NP_001271231.1 anillin isoform 3 [Homo sapiens]	common SCSs = 4		>NP_001271231.1 anillin isoform 3	4
>NP_001273135.1 centrosomal protein of 162 kDa isoform b [Homo sapiens]	common SCSs = 4		>NP_001273135.1 centrosomal protein of 162 kDa isoform b	4
>NP_001273171.1 general transcription factor 3C polypeptide 1 isoform 2 [Homo sapiens]	common SCSs = 4		>NP_001273171.1 general transcription factor 3C polypeptide 1 isoform 2	4
>NP_001273424.1 protein FAM214A isoform 2 [Homo sapiens]	common SCSs = 4		>NP_001273424.1 protein FAM214A isoform 2	4
>NP_001273685.1 anaphase-promoting complex subunit 4 isoform 1 [Homo sapiens]	common SCSs = 4		>NP_001273685.1 anaphase-promoting complex subunit 4 isoform 1	4
>NP_001275918.1 1-phosphatidylinositol 4,5-bisphosphate phosphodiesterase epsilon-1 isoform 3 [Homo sapiens]	common SCSs = 4		>NP_001275918.1 1-phosphatidylinositol 4,5-bisphosphate phosphodiesterase epsilon-1 isoform 3	4
>NP_001276916.1 filamin-A-interacting protein 1 isoform 1 [Homo sapiens]	common SCSs = 4		>NP_001276916.1 filamin-A-interacting protein 1 isoform 1	4
>NP_001277192.1 dedicator of cytokinesis protein 10 isoform 2 [Homo sapiens]	common SCSs = 4		>NP_001277192.1 dedicator of cytokinesis protein 10 isoform 2	4
>NP_001277223.2 sorbin and SH3 domain-containing protein 1 isoform 8 [Homo sapiens]	common SCSs = 4		>NP_001277223.2 sorbin and SH3 domain-containing protein 1 isoform 8	4
>NP_001277236.1 catenin alpha-1 isoform 2 [Homo sapiens]	common SCSs = 4		>NP_001277236.1 catenin alpha-1 isoform 2	4
>NP_001277250.1 dmX-like protein 1 isoform 1 [Homo sapiens]	common SCSs = 4		>NP_001277250.1 dmX-like protein 1 isoform 1	4
>NP_001278744.1 hemicentin-2 precursor [Homo sapiens]	common SCSs = 4		>NP_001278744.1 hemicentin-2 precursor	4
>NP_001278938.1 protein eyes shut homolog isoform 4 precursor [Homo sapiens]	common SCSs = 4		>NP_001278938.1 protein eyes shut homolog isoform 4 precursor	4
>NP_001278972.1 histone-lysine N-methyltransferase SETD5 isoform 2 [Homo sapiens]	common SCSs = 4		>NP_001278972.1 histone-lysine N-methyltransferase SETD5 isoform 2	4
>NP_001280569.1 WASH complex subunit 4 isoform 1 [Homo sapiens]	common SCSs = 4		>NP_001280569.1 WASH complex subunit 4 isoform 1	4
>NP_001284538.1 mitogen-activated protein kinase kinase kinase 6 isoform 2 [Homo sapiens]	common SCSs = 4		>NP_001284538.1 mitogen-activated protein kinase kinase kinase 6 isoform 2	4
>NP_001287795.1 filamin-A-interacting protein 1 isoform 3 [Homo sapiens]	common SCSs = 4		>NP_001287795.1 filamin-A-interacting protein 1 isoform 3	4
>NP_001288655.1 transcription factor-like 5 protein isoform 2 [Homo sapiens]	common SCSs = 4		>NP_001288655.1 transcription factor-like 5 protein isoform 2	4
>NP_001295051.1 solute carrier family 22 member 5 isoform a [Homo sapiens]	common SCSs = 4		>NP_001295051.1 solute carrier family 22 member 5 isoform a	4
>NP_001304677.1 matrilin-2 isoform c precursor [Homo sapiens]	common SCSs = 4		>NP_001304677.1 matrilin-2 isoform c precursor	4
>NP_001305169.1 nuclear receptor coactivator 6 isoform 1 [Homo sapiens]	common SCSs = 4		>NP_001305169.1 nuclear receptor coactivator 6 isoform 1	4
>NP_001305174.1 unconventional myosin-XVIIIb isoform 1 [Homo sapiens]	common SCSs = 4		>NP_001305174.1 unconventional myosin-XVIIIb isoform 1	4
>NP_001305710.1 A disintegrin and metalloproteinase with thrombospondin motifs 9 isoform 4 precursor [Homo sapiens]	common SCSs = 4		>NP_001305710.1 A disintegrin and metalloproteinase with thrombospondin motifs 9 isoform 4 precursor	4
>NP_001305733.1 neuronal PAS domain-containing protein 4 isoform 2 [Homo sapiens]	common SCSs = 4		>NP_001305733.1 neuronal PAS domain-containing protein 4 isoform 2	4
>NP_001306913.1 Fanconi anemia group D2 protein isoform b [Homo sapiens]	common SCSs = 4		>NP_001306913.1 Fanconi anemia group D2 protein isoform b	4
>NP_001307395.1 palmitoyltransferase ZDHHC23 isoform a [Homo sapiens]	common SCSs = 4		>NP_001307395.1 palmitoyltransferase ZDHHC23 isoform a	4
>NP_001307396.1 palmitoyltransferase ZDHHC23 isoform a [Homo sapiens]	common SCSs = 4		>NP_001307396.1 palmitoyltransferase ZDHHC23 isoform a	4
>NP_001307397.1 palmitoyltransferase ZDHHC23 isoform b [Homo sapiens]	common SCSs = 4		>NP_001307397.1 palmitoyltransferase ZDHHC23 isoform b	4
>NP_001308780.1 thyroid receptor-interacting protein 11 isoform 2 [Homo sapiens]	common SCSs = 4		>NP_001308780.1 thyroid receptor-interacting protein 11 isoform 2	4
>NP_001309405.1 Hermansky-Pudlak syndrome 1 protein isoform a [Homo sapiens]	common SCSs = 4		>NP_001309405.1 Hermansky-Pudlak syndrome 1 protein isoform a	4
>NP_001309406.1 Hermansky-Pudlak syndrome 1 protein isoform a [Homo sapiens]	common SCSs = 4		>NP_001309406.1 Hermansky-Pudlak syndrome 1 protein isoform a	4
>NP_001309409.1 Hermansky-Pudlak syndrome 1 protein isoform g [Homo sapiens]	common SCSs = 4		>NP_001309409.1 Hermansky-Pudlak syndrome 1 protein isoform g	4
>NP_001309410.1 Hermansky-Pudlak syndrome 1 protein isoform g [Homo sapiens]	common SCSs = 4		>NP_001309410.1 Hermansky-Pudlak syndrome 1 protein isoform g	4
>NP_001309412.1 Hermansky-Pudlak syndrome 1 protein isoform i [Homo sapiens]	common SCSs = 4		>NP_001309412.1 Hermansky-Pudlak syndrome 1 protein isoform i	4
>NP_001309413.1 Hermansky-Pudlak syndrome 1 protein isoform i [Homo sapiens]	common SCSs = 4		>NP_001309413.1 Hermansky-Pudlak syndrome 1 protein isoform i	4
>NP_001316559.1 pleckstrin homology domain-containing family A member 7 isoform 1 [Homo sapiens]	common SCSs = 4		>NP_001316559.1 pleckstrin homology domain-containing family A member 7 isoform 1	4
>NP_001316560.1 pleckstrin homology domain-containing family A member 7 isoform 3 [Homo sapiens]	common SCSs = 4		>NP_001316560.1 pleckstrin homology domain-containing family A member 7 isoform 3	4
>NP_001317003.1 WASH complex subunit 2C isoform 4 [Homo sapiens]	common SCSs = 4		>NP_001317003.1 WASH complex subunit 2C isoform 4	4
>NP_001317958.1 protein phosphatase 1 regulatory subunit 12B isoform h [Homo sapiens]	common SCSs = 4		>NP_001317958.1 protein phosphatase 1 regulatory subunit 12B isoform h	4
>NP_001333208.1 RNA polymerase-associated protein CTR9 homolog isoform 2 [Homo sapiens]	common SCSs = 4		>NP_001333208.1 RNA polymerase-associated protein CTR9 homolog isoform 2	4
>NP_001333799.1 baculoviral IAP repeat-containing protein 1 isoform 1 [Homo sapiens]	common SCSs = 4		>NP_001333799.1 baculoviral IAP repeat-containing protein 1 isoform 1	4
>NP_001336168.1 dmX-like protein 1 isoform 1 [Homo sapiens]	common SCSs = 4		>NP_001336168.1 dmX-like protein 1 isoform 1	4
>NP_001336380.1 histone-lysine N-methyltransferase SETD5 isoform 2 [Homo sapiens]	common SCSs = 4		>NP_001336380.1 histone-lysine N-methyltransferase SETD5 isoform 2	4
>NP_001336991.1 protein TANC1 isoform 3 [Homo sapiens]	common SCSs = 4		>NP_001336991.1 protein TANC1 isoform 3	4
>NP_001337338.1 dyslexia-associated protein KIAA0319 isoform i [Homo sapiens]	common SCSs = 4		>NP_001337338.1 dyslexia-associated protein KIAA0319 isoform i	4
>NP_001337339.1 dyslexia-associated protein KIAA0319 isoform i [Homo sapiens]	common SCSs = 4		>NP_001337339.1 dyslexia-associated protein KIAA0319 isoform i	4
>NP_001337858.1 protein AHNAK2 isoform 2 [Homo sapiens]	common SCSs = 4		>NP_001337858.1 protein AHNAK2 isoform 2	4
>NP_001338622.1 pleckstrin homology domain-containing family G member 2 isoform 2 [Homo sapiens]	common SCSs = 4		>NP_001338622.1 pleckstrin homology domain-containing family G member 2 isoform 2	4
>NP_001341214.1 signal-induced proliferation-associated 1-like protein 1 isoform 1 [Homo sapiens]	common SCSs = 4		>NP_001341214.1 signal-induced proliferation-associated 1-like protein 1 isoform 1	4
>NP_001341215.1 signal-induced proliferation-associated 1-like protein 1 isoform 3 [Homo sapiens]	common SCSs = 4		>NP_001341215.1 signal-induced proliferation-associated 1-like protein 1 isoform 3	4
>NP_001341216.1 signal-induced proliferation-associated 1-like protein 1 isoform 3 [Homo sapiens]	common SCSs = 4		>NP_001341216.1 signal-induced proliferation-associated 1-like protein 1 isoform 3	4
>NP_001341217.1 signal-induced proliferation-associated 1-like protein 1 isoform 3 [Homo sapiens]	common SCSs = 4		>NP_001341217.1 signal-induced proliferation-associated 1-like protein 1 isoform 3	4
>NP_001341311.1 inositol hexakisphosphate and diphosphoinositol-pentakisphosphate kinase 1 isoform 7 [Homo sapiens]	common SCSs = 4		>NP_001341311.1 inositol hexakisphosphate and diphosphoinositol-pentakisphosphate kinase 1 isoform 7	4
>NP_001341312.1 inositol hexakisphosphate and diphosphoinositol-pentakisphosphate kinase 1 isoform 7 [Homo sapiens]	common SCSs = 4		>NP_001341312.1 inositol hexakisphosphate and diphosphoinositol-pentakisphosphate kinase 1 isoform 7	4
>NP_001341313.1 inositol hexakisphosphate and diphosphoinositol-pentakisphosphate kinase 1 isoform 7 [Homo sapiens]	common SCSs = 4		>NP_001341313.1 inositol hexakisphosphate and diphosphoinositol-pentakisphosphate kinase 1 isoform 7	4
>NP_001341314.1 inositol hexakisphosphate and diphosphoinositol-pentakisphosphate kinase 1 isoform 7 [Homo sapiens]	common SCSs = 4		>NP_001341314.1 inositol hexakisphosphate and diphosphoinositol-pentakisphosphate kinase 1 isoform 7	4
>NP_001341315.1 inositol hexakisphosphate and diphosphoinositol-pentakisphosphate kinase 1 isoform 7 [Homo sapiens]	common SCSs = 4		>NP_001341315.1 inositol hexakisphosphate and diphosphoinositol-pentakisphosphate kinase 1 isoform 7	4
>NP_001341316.1 inositol hexakisphosphate and diphosphoinositol-pentakisphosphate kinase 1 isoform 8 [Homo sapiens]	common SCSs = 4		>NP_001341316.1 inositol hexakisphosphate and diphosphoinositol-pentakisphosphate kinase 1 isoform 8	4
>NP_001341317.1 inositol hexakisphosphate and diphosphoinositol-pentakisphosphate kinase 1 isoform 8 [Homo sapiens]	common SCSs = 4		>NP_001341317.1 inositol hexakisphosphate and diphosphoinositol-pentakisphosphate kinase 1 isoform 8	4
>NP_001341318.1 inositol hexakisphosphate and diphosphoinositol-pentakisphosphate kinase 1 isoform 8 [Homo sapiens]	common SCSs = 4		>NP_001341318.1 inositol hexakisphosphate and diphosphoinositol-pentakisphosphate kinase 1 isoform 8	4
>NP_001341319.1 inositol hexakisphosphate and diphosphoinositol-pentakisphosphate kinase 1 isoform 2 [Homo sapiens]	common SCSs = 4		>NP_001341319.1 inositol hexakisphosphate and diphosphoinositol-pentakisphosphate kinase 1 isoform 2	4
>NP_001341320.1 inositol hexakisphosphate and diphosphoinositol-pentakisphosphate kinase 1 isoform 2 [Homo sapiens]	common SCSs = 4		>NP_001341320.1 inositol hexakisphosphate and diphosphoinositol-pentakisphosphate kinase 1 isoform 2	4
>NP_001341321.1 inositol hexakisphosphate and diphosphoinositol-pentakisphosphate kinase 1 isoform 2 [Homo sapiens]	common SCSs = 4		>NP_001341321.1 inositol hexakisphosphate and diphosphoinositol-pentakisphosphate kinase 1 isoform 2	4
>NP_001341322.1 inositol hexakisphosphate and diphosphoinositol-pentakisphosphate kinase 1 isoform 9 [Homo sapiens]	common SCSs = 4		>NP_001341322.1 inositol hexakisphosphate and diphosphoinositol-pentakisphosphate kinase 1 isoform 9	4
>NP_001341323.1 inositol hexakisphosphate and diphosphoinositol-pentakisphosphate kinase 1 isoform 10 [Homo sapiens]	common SCSs = 4		>NP_001341323.1 inositol hexakisphosphate and diphosphoinositol-pentakisphosphate kinase 1 isoform 10	4
>NP_001341324.1 inositol hexakisphosphate and diphosphoinositol-pentakisphosphate kinase 1 isoform 11 [Homo sapiens]	common SCSs = 4		>NP_001341324.1 inositol hexakisphosphate and diphosphoinositol-pentakisphosphate kinase 1 isoform 11	4
>NP_001341325.1 inositol hexakisphosphate and diphosphoinositol-pentakisphosphate kinase 1 isoform 11 [Homo sapiens]	common SCSs = 4		>NP_001341325.1 inositol hexakisphosphate and diphosphoinositol-pentakisphosphate kinase 1 isoform 11	4
>NP_001341326.1 inositol hexakisphosphate and diphosphoinositol-pentakisphosphate kinase 1 isoform 11 [Homo sapiens]	common SCSs = 4		>NP_001341326.1 inositol hexakisphosphate and diphosphoinositol-pentakisphosphate kinase 1 isoform 11	4
>NP_001341407.1 roquin-2 isoform 3 [Homo sapiens]	common SCSs = 4		>NP_001341407.1 roquin-2 isoform 3	4
>NP_001341411.1 roquin-2 isoform 5 [Homo sapiens]	common SCSs = 4		>NP_001341411.1 roquin-2 isoform 5	4
>NP_001350691.1 dedicator of cytokinesis protein 10 isoform 3 [Homo sapiens]	common SCSs = 4		>NP_001350691.1 dedicator of cytokinesis protein 10 isoform 3	4
>NP_001350881.1 palmitoyltransferase ZDHHC23 isoform d [Homo sapiens]	common SCSs = 4		>NP_001350881.1 palmitoyltransferase ZDHHC23 isoform d	4
>NP_001351095.1 glutamate receptor 1 isoform 9 [Homo sapiens]	common SCSs = 4		>NP_001351095.1 glutamate receptor 1 isoform 9	4
>NP_001351096.1 glutamate receptor 1 isoform 10 [Homo sapiens]	common SCSs = 4		>NP_001351096.1 glutamate receptor 1 isoform 10	4
>NP_001352054.1 nuclear pore complex protein Nup98-Nup96 isoform 5 [Homo sapiens]	common SCSs = 4		>NP_001352054.1 nuclear pore complex protein Nup98-Nup96 isoform 5	4
>NP_001352056.1 nuclear pore complex protein Nup98-Nup96 isoform 7 precursor [Homo sapiens]	common SCSs = 4		>NP_001352056.1 nuclear pore complex protein Nup98-Nup96 isoform 7 precursor	4
>NP_001352057.1 nuclear pore complex protein Nup98-Nup96 isoform 8 precursor [Homo sapiens]	common SCSs = 4		>NP_001352057.1 nuclear pore complex protein Nup98-Nup96 isoform 8 precursor	4
>NP_001352058.1 nuclear pore complex protein Nup98-Nup96 isoform 9 [Homo sapiens]	common SCSs = 4		>NP_001352058.1 nuclear pore complex protein Nup98-Nup96 isoform 9	4
>NP_001352217.1 putative short-chain dehydrogenase/reductase family 42E member 2 [Homo sapiens]	common SCSs = 4		>NP_001352217.1 putative short-chain dehydrogenase/reductase family 42E member 2	4
>NP_001352613.1 histone-lysine N-methyltransferase, H3 lysine-36 specific isoform a [Homo sapiens]	common SCSs = 4		>NP_001352613.1 histone-lysine N-methyltransferase, H3 lysine-36 specific isoform a	4
>NP_001352622.1 maltase-glucoamylase, intestinal isoform 1 [Homo sapiens]	common SCSs = 4		>NP_001352622.1 maltase-glucoamylase, intestinal isoform 1	4
>NP_001352957.1 dynein heavy chain 12, axonemal isoform 4 [Homo sapiens]	common SCSs = 4		>NP_001352957.1 dynein heavy chain 12, axonemal isoform 4	4
>NP_001353346.1 histone-lysine N-methyltransferase SETDB1 isoform 4 [Homo sapiens]	common SCSs = 4		>NP_001353346.1 histone-lysine N-methyltransferase SETDB1 isoform 4	4
>NP_001353347.1 histone-lysine N-methyltransferase SETDB1 isoform 4 [Homo sapiens]	common SCSs = 4		>NP_001353347.1 histone-lysine N-methyltransferase SETDB1 isoform 4	4
>NP_001354324.1 WASH complex subunit 2C isoform 7 [Homo sapiens]	common SCSs = 4		>NP_001354324.1 WASH complex subunit 2C isoform 7	4
>NP_001354325.1 WASH complex subunit 2C isoform 8 [Homo sapiens]	common SCSs = 4		>NP_001354325.1 WASH complex subunit 2C isoform 8	4
>NP_001354326.1 WASH complex subunit 2C isoform 9 [Homo sapiens]	common SCSs = 4		>NP_001354326.1 WASH complex subunit 2C isoform 9	4
>NP_001354332.1 WASH complex subunit 2C isoform 14 [Homo sapiens]	common SCSs = 4		>NP_001354332.1 WASH complex subunit 2C isoform 14	4
>NP_001354333.1 WASH complex subunit 2C isoform 15 [Homo sapiens]	common SCSs = 4		>NP_001354333.1 WASH complex subunit 2C isoform 15	4
>NP_001354340.1 WASH complex subunit 2C isoform 19 [Homo sapiens]	common SCSs = 4		>NP_001354340.1 WASH complex subunit 2C isoform 19	4
>NP_001354878.1 protocadherin Fat 3 isoform 1 precursor [Homo sapiens]	common SCSs = 4		>NP_001354878.1 protocadherin Fat 3 isoform 1 precursor	4
>NP_001354908.1 doublecortin domain-containing protein 1 isoform 4 [Homo sapiens]	common SCSs = 4		>NP_001354908.1 doublecortin domain-containing protein 1 isoform 4	4
>NP_001356324.1 receptor-type tyrosine-protein phosphatase zeta isoform 4 precursor [Homo sapiens]	common SCSs = 4		>NP_001356324.1 receptor-type tyrosine-protein phosphatase zeta isoform 4 precursor	4
>NP_001356325.1 receptor-type tyrosine-protein phosphatase zeta isoform 5 [Homo sapiens]	common SCSs = 4		>NP_001356325.1 receptor-type tyrosine-protein phosphatase zeta isoform 5	4
>NP_001356418.1 arf-GAP with Rho-GAP domain, ANK repeat and PH domain-containing protein 1 isoform e [Homo sapiens]	common SCSs = 4		>NP_001356418.1 arf-GAP with Rho-GAP domain, ANK repeat and PH domain-containing protein 1 isoform e	4
>NP_001356735.1 homeodomain-interacting protein kinase 1 isoform 1 [Homo sapiens]	common SCSs = 4		>NP_001356735.1 homeodomain-interacting protein kinase 1 isoform 1	4
>NP_001356736.1 homeodomain-interacting protein kinase 1 isoform 5 [Homo sapiens]	common SCSs = 4		>NP_001356736.1 homeodomain-interacting protein kinase 1 isoform 5	4
>NP_001357082.1 WD repeat- and FYVE domain-containing protein 4 isoform 2 [Homo sapiens]	common SCSs = 4		>NP_001357082.1 WD repeat- and FYVE domain-containing protein 4 isoform 2	4
>NP_001357225.1 fibroblast growth factor receptor-like 1 precursor [Homo sapiens]	common SCSs = 4		>NP_001357225.1 fibroblast growth factor receptor-like 1 precursor	4
>NP_001358116.1 protein unc-13 homolog B isoform 4 [Homo sapiens]	common SCSs = 4		>NP_001358116.1 protein unc-13 homolog B isoform 4	4
>NP_001358118.1 protein unc-13 homolog B isoform 6 [Homo sapiens]	common SCSs = 4		>NP_001358118.1 protein unc-13 homolog B isoform 6	4
>NP_001358857.1 AT-hook DNA-binding motif-containing protein 1 [Homo sapiens]	common SCSs = 4		>NP_001358857.1 AT-hook DNA-binding motif-containing protein 1	4
>NP_001361.1 dynein heavy chain 6, axonemal [Homo sapiens]	common SCSs = 4		>NP_001361.1 dynein heavy chain 6, axonemal	4
>NP_001361182.1 Fanconi anemia group D2 protein isoform c [Homo sapiens]	common SCSs = 4		>NP_001361182.1 Fanconi anemia group D2 protein isoform c	4
>NP_001361183.1 Fanconi anemia group D2 protein isoform d [Homo sapiens]	common SCSs = 4		>NP_001361183.1 Fanconi anemia group D2 protein isoform d	4
>NP_001361651.1 dystonin isoform 6 [Homo sapiens]	common SCSs = 4		>NP_001361651.1 dystonin isoform 6	4
>NP_001361663.1 dystonin isoform 5 [Homo sapiens]	common SCSs = 4		>NP_001361663.1 dystonin isoform 5	4
>NP_001361665.1 dystonin isoform 4 [Homo sapiens]	common SCSs = 4		>NP_001361665.1 dystonin isoform 4	4
>NP_001362356.1 multiple PDZ domain protein isoform 8 [Homo sapiens]	common SCSs = 4		>NP_001362356.1 multiple PDZ domain protein isoform 8	4
>NP_001364250.1 ATP-binding cassette sub-family A member 10 [Homo sapiens]	common SCSs = 4		>NP_001364250.1 ATP-binding cassette sub-family A member 10	4
>NP_001365929.3 glutamate receptor 2 isoform 4 [Homo sapiens]	common SCSs = 4		>NP_001365929.3 glutamate receptor 2 isoform 4	4
>NP_001365930.3 glutamate receptor 2 isoform 3 [Homo sapiens]	common SCSs = 4		>NP_001365930.3 glutamate receptor 2 isoform 3	4
>NP_001366174.1 neurobeachin isoform 3 [Homo sapiens]	common SCSs = 4		>NP_001366174.1 neurobeachin isoform 3	4
>NP_001366540.1 glutamyl aminopeptidase isoform 2 [Homo sapiens]	common SCSs = 4		>NP_001366540.1 glutamyl aminopeptidase isoform 2	4
>NP_001371380.1 sorbin and SH3 domain-containing protein 1 isoform 30 [Homo sapiens]	common SCSs = 4		>NP_001371380.1 sorbin and SH3 domain-containing protein 1 isoform 30	4
>NP_001371382.1 sorbin and SH3 domain-containing protein 1 isoform 32 [Homo sapiens]	common SCSs = 4		>NP_001371382.1 sorbin and SH3 domain-containing protein 1 isoform 32	4
>NP_001371383.1 sorbin and SH3 domain-containing protein 1 isoform 32 [Homo sapiens]	common SCSs = 4		>NP_001371383.1 sorbin and SH3 domain-containing protein 1 isoform 32	4
>NP_001371560.1 dipeptidyl peptidase 9 isoform 10 [Homo sapiens]	common SCSs = 4		>NP_001371560.1 dipeptidyl peptidase 9 isoform 10	4
>NP_001371661.1 ciliogenesis and planar polarity effector 1 isoform 1 [Homo sapiens]	common SCSs = 4		>NP_001371661.1 ciliogenesis and planar polarity effector 1 isoform 1	4
>NP_001371941.1 neurobeachin isoform 4 [Homo sapiens]	common SCSs = 4		>NP_001371941.1 neurobeachin isoform 4	4
>NP_001371942.1 protein FAM214A isoform 1 [Homo sapiens]	common SCSs = 4		>NP_001371942.1 protein FAM214A isoform 1	4
>NP_001371943.1 protein FAM214A isoform 1 [Homo sapiens]	common SCSs = 4		>NP_001371943.1 protein FAM214A isoform 1	4
>NP_001371944.1 protein FAM214A isoform 1 [Homo sapiens]	common SCSs = 4		>NP_001371944.1 protein FAM214A isoform 1	4
>NP_001371945.1 protein FAM214A isoform 1 [Homo sapiens]	common SCSs = 4		>NP_001371945.1 protein FAM214A isoform 1	4
>NP_001371946.1 protein FAM214A isoform 1 [Homo sapiens]	common SCSs = 4		>NP_001371946.1 protein FAM214A isoform 1	4
>NP_001371947.1 protein FAM214A isoform 1 [Homo sapiens]	common SCSs = 4		>NP_001371947.1 protein FAM214A isoform 1	4
>NP_001371948.1 protein FAM214A isoform 3 [Homo sapiens]	common SCSs = 4		>NP_001371948.1 protein FAM214A isoform 3	4
>NP_001371949.1 protein FAM214A isoform 4 [Homo sapiens]	common SCSs = 4		>NP_001371949.1 protein FAM214A isoform 4	4
>NP_001371950.1 protein FAM214A isoform 5 [Homo sapiens]	common SCSs = 4		>NP_001371950.1 protein FAM214A isoform 5	4
>NP_001371951.1 protein FAM214A isoform 6 [Homo sapiens]	common SCSs = 4		>NP_001371951.1 protein FAM214A isoform 6	4
>NP_001371952.1 protein FAM214A isoform 6 [Homo sapiens]	common SCSs = 4		>NP_001371952.1 protein FAM214A isoform 6	4
>NP_001372593.1 microtubule-associated protein 4 isoform 9 [Homo sapiens]	common SCSs = 4		>NP_001372593.1 microtubule-associated protein 4 isoform 9	4
>NP_001372611.1 microtubule-associated protein 4 isoform 6 [Homo sapiens]	common SCSs = 4		>NP_001372611.1 microtubule-associated protein 4 isoform 6	4
>NP_001372616.1 microtubule-associated protein 4 isoform 2 [Homo sapiens]	common SCSs = 4		>NP_001372616.1 microtubule-associated protein 4 isoform 2	4
>NP_001372617.1 microtubule-associated protein 4 isoform 8 [Homo sapiens]	common SCSs = 4		>NP_001372617.1 microtubule-associated protein 4 isoform 8	4
>NP_001372618.1 microtubule-associated protein 4 isoform 7 [Homo sapiens]	common SCSs = 4		>NP_001372618.1 microtubule-associated protein 4 isoform 7	4
>NP_001511.2 general transcription factor 3C polypeptide 1 isoform 1 [Homo sapiens]	common SCSs = 4		>NP_001511.2 general transcription factor 3C polypeptide 1 isoform 1	4
>NP_001914.3 DNA damage-binding protein 1 [Homo sapiens]	common SCSs = 4		>NP_001914.3 DNA damage-binding protein 1	4
>NP_002281.3 laminin subunit alpha-4 isoform 2 precursor [Homo sapiens]	common SCSs = 4		>NP_002281.3 laminin subunit alpha-4 isoform 2 precursor	4
>NP_002283.3 laminin subunit beta-2 precursor [Homo sapiens]	common SCSs = 4		>NP_002283.3 laminin subunit beta-2 precursor	4
>NP_002371.3 matrilin-2 isoform a precursor [Homo sapiens]	common SCSs = 4		>NP_002371.3 matrilin-2 isoform a precursor	4
>NP_002448.4 mucin-2 precursor [Homo sapiens]	common SCSs = 4		>NP_002448.4 mucin-2 precursor	4
>NP_002472.2 protein phosphatase 1 regulatory subunit 12B isoform a [Homo sapiens]	common SCSs = 4		>NP_002472.2 protein phosphatase 1 regulatory subunit 12B isoform a	4
>NP_002842.2 receptor-type tyrosine-protein phosphatase zeta isoform 1 precursor [Homo sapiens]	common SCSs = 4		>NP_002842.2 receptor-type tyrosine-protein phosphatase zeta isoform 1 precursor	4
>NP_003051.1 solute carrier family 22 member 5 isoform b [Homo sapiens]	common SCSs = 4		>NP_003051.1 solute carrier family 22 member 5 isoform b	4
>NP_003053.2 slit homolog 3 protein isoform 2 precursor [Homo sapiens]	common SCSs = 4		>NP_003053.2 slit homolog 3 protein isoform 2 precursor	4
>NP_003480.2 nuclear receptor-interacting protein 1 [Homo sapiens]	common SCSs = 4		>NP_003480.2 nuclear receptor-interacting protein 1	4
>NP_003861.1 ras GTPase-activating-like protein IQGAP1 [Homo sapiens]	common SCSs = 4		>NP_003861.1 ras GTPase-activating-like protein IQGAP1	4
>NP_003961.3 myomesin-2 [Homo sapiens]	common SCSs = 4		>NP_003961.3 myomesin-2	4
>NP_004230.2 thyroid receptor-interacting protein 11 isoform 1 [Homo sapiens]	common SCSs = 4		>NP_004230.2 thyroid receptor-interacting protein 11 isoform 1	4
>NP_004362.2 coatomer subunit alpha isoform 2 [Homo sapiens]	common SCSs = 4		>NP_004362.2 coatomer subunit alpha isoform 2	4
>NP_004376.2 versican core protein isoform 1 precursor [Homo sapiens]	common SCSs = 4		>NP_004376.2 versican core protein isoform 1 precursor	4
>NP_004516.2 low-density lipoprotein receptor-related protein 2 precursor [Homo sapiens]	common SCSs = 4		>NP_004516.2 low-density lipoprotein receptor-related protein 2 precursor	4
>NP_004527.2 baculoviral IAP repeat-containing protein 1 isoform 1 [Homo sapiens]	common SCSs = 4		>NP_004527.2 baculoviral IAP repeat-containing protein 1 isoform 1	4
>NP_004534.3 nebulin isoform 3 [Homo sapiens]	common SCSs = 4		>NP_004534.3 nebulin isoform 3	4
>NP_004659.2 maltase-glucoamylase, intestinal isoform 2 [Homo sapiens]	common SCSs = 4		>NP_004659.2 maltase-glucoamylase, intestinal isoform 2	4
>NP_004663.3 mitogen-activated protein kinase kinase kinase 6 isoform 1 [Homo sapiens]	common SCSs = 4		>NP_004663.3 mitogen-activated protein kinase kinase kinase 6 isoform 1	4
>NP_004738.3 disks large homolog 5 [Homo sapiens]	common SCSs = 4		>NP_004738.3 disks large homolog 5	4
>NP_004810.2 symplekin [Homo sapiens]	common SCSs = 4		>NP_004810.2 symplekin	4
>NP_005236.2 protocadherin Fat 1 precursor [Homo sapiens]	common SCSs = 4		>NP_005236.2 protocadherin Fat 1 precursor	4
>NP_005372.2 nucleolin [Homo sapiens]	common SCSs = 4		>NP_005372.2 nucleolin	4
>NP_005553.2 laminin subunit gamma-2 isoform a precursor [Homo sapiens]	common SCSs = 4		>NP_005553.2 laminin subunit gamma-2 isoform a precursor	4
>NP_005843.2 chromodomain-helicase-DNA-binding protein 3 isoform 2 [Homo sapiens]	common SCSs = 4		>NP_005843.2 chromodomain-helicase-DNA-binding protein 3 isoform 2	4
>NP_006120.1 bone morphogenetic protein 1 isoform 3 precursor [Homo sapiens]	common SCSs = 4		>NP_006120.1 bone morphogenetic protein 1 isoform 3 precursor	4
>NP_006280.3 talin-1 [Homo sapiens]	common SCSs = 4		>NP_006280.3 talin-1	4
>NP_006303.4 nuclear receptor corepressor 2 isoform 1 [Homo sapiens]	common SCSs = 4		>NP_006303.4 nuclear receptor corepressor 2 isoform 1	4
>NP_006593.2 transcription factor-like 5 protein isoform 1 [Homo sapiens]	common SCSs = 4		>NP_006593.2 transcription factor-like 5 protein isoform 1	4
>NP_015564.5 glutamate receptor 3 isoform 1 precursor [Homo sapiens]	common SCSs = 4		>NP_015564.5 glutamate receptor 3 isoform 1 precursor	4
>NP_036564.3 histone-lysine N-methyltransferase SETDB1 isoform 2 [Homo sapiens]	common SCSs = 4		>NP_036564.3 histone-lysine N-methyltransferase SETDB1 isoform 2	4
>NP_036565.2 splicing factor 3B subunit 1 isoform 1 [Homo sapiens]	common SCSs = 4		>NP_036565.2 splicing factor 3B subunit 1 isoform 1	4
>NP_037499.2 anaphase-promoting complex subunit 4 isoform 2 [Homo sapiens]	common SCSs = 4		>NP_037499.2 anaphase-promoting complex subunit 4 isoform 2	4
>NP_054790.2 nuclear receptor coactivator 6 isoform 1 [Homo sapiens]	common SCSs = 4		>NP_054790.2 nuclear receptor coactivator 6 isoform 1	4
>NP_055043.2 sodium-dependent proline transporter [Homo sapiens]	common SCSs = 4		>NP_055043.2 sodium-dependent proline transporter	4
>NP_055426.1 midasin [Homo sapiens]	common SCSs = 4		>NP_055426.1 midasin	4
>NP_055448.1 RNA polymerase-associated protein CTR9 homolog isoform 1 [Homo sapiens]	common SCSs = 4		>NP_055448.1 RNA polymerase-associated protein CTR9 homolog isoform 1	4
>NP_055474.3 inositol hexakisphosphate and diphosphoinositol-pentakisphosphate kinase 1 isoform 2 [Homo sapiens]	common SCSs = 4		>NP_055474.3 inositol hexakisphosphate and diphosphoinositol-pentakisphosphate kinase 1 isoform 2	4
>NP_055504.2 dedicator of cytokinesis protein 10 isoform 1 [Homo sapiens]	common SCSs = 4		>NP_055504.2 dedicator of cytokinesis protein 10 isoform 1	4
>NP_055596.3 RB1-inducible coiled-coil protein 1 isoform 1 [Homo sapiens]	common SCSs = 4		>NP_055596.3 RB1-inducible coiled-coil protein 1 isoform 1	4
>NP_055616.3 pecanex-like protein 2 isoform 1 [Homo sapiens]	common SCSs = 4		>NP_055616.3 pecanex-like protein 2 isoform 1	4
>NP_055710.2 centrosomal protein of 162 kDa isoform a [Homo sapiens]	common SCSs = 4		>NP_055710.2 centrosomal protein of 162 kDa isoform a	4
>NP_055718.4 neuron navigator 3 isoform 2 [Homo sapiens]	common SCSs = 4		>NP_055718.4 neuron navigator 3 isoform 2	4
>NP_055807.1 disheveled-associated activator of morphogenesis 1 isoform 1 [Homo sapiens]	common SCSs = 4		>NP_055807.1 disheveled-associated activator of morphogenesis 1 isoform 1	4
>NP_055872.4 E3 ubiquitin-protein ligase MYCBP2 [Homo sapiens]	common SCSs = 4		>NP_055872.4 E3 ubiquitin-protein ligase MYCBP2	4
>NP_055907.3 serine/threonine-protein kinase SMG1 [Homo sapiens]	common SCSs = 4		>NP_055907.3 serine/threonine-protein kinase SMG1	4
>NP_056057.2 arf-GAP with Rho-GAP domain, ANK repeat and PH domain-containing protein 1 isoform a [Homo sapiens]	common SCSs = 4		>NP_056057.2 arf-GAP with Rho-GAP domain, ANK repeat and PH domain-containing protein 1 isoform a	4
>NP_056090.1 WASH complex subunit 4 isoform 2 [Homo sapiens]	common SCSs = 4		>NP_056090.1 WASH complex subunit 4 isoform 2	4
>NP_056140.1 little elongation complex subunit 1 [Homo sapiens]	common SCSs = 4		>NP_056140.1 little elongation complex subunit 1	4
>NP_056197.3 E3 ubiquitin-protein ligase HECTD1 [Homo sapiens]	common SCSs = 4		>NP_056197.3 E3 ubiquitin-protein ligase HECTD1	4
>NP_056355.2 RNA polymerase II-associated protein 1 [Homo sapiens]	common SCSs = 4		>NP_056355.2 RNA polymerase II-associated protein 1	4
>NP_056371.1 signal-induced proliferation-associated 1-like protein 1 isoform 1 [Homo sapiens]	common SCSs = 4		>NP_056371.1 signal-induced proliferation-associated 1-like protein 1 isoform 1	4
>NP_056493.3 neurobeachin isoform 1 [Homo sapiens]	common SCSs = 4		>NP_056493.3 neurobeachin isoform 1	4
>NP_056502.1 filamin-A-interacting protein 1 isoform 2 [Homo sapiens]	common SCSs = 4		>NP_056502.1 filamin-A-interacting protein 1 isoform 2	4
>NP_056526.3 BRD4-interacting chromatin-remodeling complex-associated protein [Homo sapiens]	common SCSs = 4		>NP_056526.3 BRD4-interacting chromatin-remodeling complex-associated protein	4
>NP_057404.2 nuclear pore complex protein Nup98-Nup96 isoform 1 precursor [Homo sapiens]	common SCSs = 4		>NP_057404.2 nuclear pore complex protein Nup98-Nup96 isoform 1 precursor	4
>NP_057425.3 1-phosphatidylinositol 4,5-bisphosphate phosphodiesterase epsilon-1 isoform 1 [Homo sapiens]	common SCSs = 4		>NP_057425.3 1-phosphatidylinositol 4,5-bisphosphate phosphodiesterase epsilon-1 isoform 1	4
>NP_059116.3 homeobox protein SIX4 [Homo sapiens]	common SCSs = 4		>NP_059116.3 homeobox protein SIX4	4
>NP_060034.9 stabilin-2 precursor [Homo sapiens]	common SCSs = 4		>NP_060034.9 stabilin-2 precursor	4
>NP_060139.2 DNA excision repair protein ERCC-6-like isoform a [Homo sapiens]	common SCSs = 4		>NP_060139.2 DNA excision repair protein ERCC-6-like isoform a	4
>NP_060404.4 PH-interacting protein [Homo sapiens]	common SCSs = 4		>NP_060404.4 PH-interacting protein	4
>NP_060653.3 protein strawberry notch homolog 1 isoform 2 [Homo sapiens]	common SCSs = 4		>NP_060653.3 protein strawberry notch homolog 1 isoform 2	4
>NP_060686.3 4'-phosphopantetheine phosphatase [Homo sapiens]	common SCSs = 4		>NP_060686.3 4'-phosphopantetheine phosphatase	4
>NP_061155.2 anillin isoform 1 [Homo sapiens]	common SCSs = 4		>NP_061155.2 anillin isoform 1	4
>NP_061486.2 laminin subunit gamma-2 isoform b precursor [Homo sapiens]	common SCSs = 4		>NP_061486.2 laminin subunit gamma-2 isoform b precursor	4
>NP_062546.2 protein FAM214A isoform 1 [Homo sapiens]	common SCSs = 4		>NP_062546.2 protein FAM214A isoform 1	4
>NP_065143.2 manganese-transporting ATPase 13A1 [Homo sapiens]	common SCSs = 4		>NP_065143.2 manganese-transporting ATPase 13A1	4
>NP_065393.1 reticulon-4 isoform A [Homo sapiens]	common SCSs = 4		>NP_065393.1 reticulon-4 isoform A	4
>NP_065815.1 caskin-1 [Homo sapiens]	common SCSs = 4		>NP_065815.1 caskin-1	4
>NP_065920.2 doublecortin domain-containing protein 1 isoform 3 [Homo sapiens]	common SCSs = 4		>NP_065920.2 doublecortin domain-containing protein 1 isoform 3	4
>NP_065973.2 serine/threonine-protein kinase WNK3 isoform 1 [Homo sapiens]	common SCSs = 4		>NP_065973.2 serine/threonine-protein kinase WNK3 isoform 1	4
>NP_067628.1 carbohydrate sulfotransferase 6 precursor [Homo sapiens]	common SCSs = 4		>NP_067628.1 carbohydrate sulfotransferase 6 precursor	4
>NP_068742.2 fibroblast growth factor receptor-like 1 precursor [Homo sapiens]	common SCSs = 4		>NP_068742.2 fibroblast growth factor receptor-like 1 precursor	4
>NP_068775.1 glutamate receptor ionotropic, kainate 2 isoform 1 precursor [Homo sapiens]	common SCSs = 4		>NP_068775.1 glutamate receptor ionotropic, kainate 2 isoform 1 precursor	4
>NP_071900.2 histone-lysine N-methyltransferase, H3 lysine-36 specific isoform b [Homo sapiens]	common SCSs = 4		>NP_071900.2 histone-lysine N-methyltransferase, H3 lysine-36 specific isoform b	4
>NP_073153.1 anaphase-promoting complex subunit 1 [Homo sapiens]	common SCSs = 4		>NP_073153.1 anaphase-promoting complex subunit 1	4
>NP_073746.2 pleckstrin homology domain-containing family G member 2 isoform 1 [Homo sapiens]	common SCSs = 4		>NP_073746.2 pleckstrin homology domain-containing family G member 2 isoform 1	4
>NP_075043.1 baculoviral IAP repeat-containing protein 1 isoform 2 [Homo sapiens]	common SCSs = 4		>NP_075043.1 baculoviral IAP repeat-containing protein 1 isoform 2	4
>NP_075062.2 solute carrier family 26 member 6 isoform 1 [Homo sapiens]	common SCSs = 4		>NP_075062.2 solute carrier family 26 member 6 isoform 1	4
>NP_075561.3 ciliogenesis and planar polarity effector 1 isoform 2 [Homo sapiens]	common SCSs = 4		>NP_075561.3 ciliogenesis and planar polarity effector 1 isoform 2	4
>NP_078838.1 transport and Golgi organization protein 6 homolog [Homo sapiens]	common SCSs = 4		>NP_078838.1 transport and Golgi organization protein 6 homolog	4
>NP_079032.2 multimerin-2 precursor [Homo sapiens]	common SCSs = 4		>NP_079032.2 multimerin-2 precursor	4
>NP_079146.2 phosphatidylinositol 3,4,5-trisphosphate-dependent Rac exchanger 2 protein isoform a [Homo sapiens]	common SCSs = 4		>NP_079146.2 phosphatidylinositol 3,4,5-trisphosphate-dependent Rac exchanger 2 protein isoform a	4
>NP_079216.4 dedicator of cytokinesis protein 5 isoform 1 [Homo sapiens]	common SCSs = 4		>NP_079216.4 dedicator of cytokinesis protein 5 isoform 1	4
>NP_079279.3 A disintegrin and metalloproteinase with thrombospondin motifs 20 preproprotein [Homo sapiens]	common SCSs = 4		>NP_079279.3 A disintegrin and metalloproteinase with thrombospondin motifs 20 preproprotein	4
>NP_079411.2 FH1/FH2 domain-containing protein 3 isoform 1 [Homo sapiens]	common SCSs = 4		>NP_079411.2 FH1/FH2 domain-containing protein 3 isoform 1	4
>NP_115928.1 SLIT and NTRK-like protein 2 precursor [Homo sapiens]	common SCSs = 4		>NP_115928.1 SLIT and NTRK-like protein 2 precursor	4
>NP_115971.2 ubiquitin carboxyl-terminal hydrolase 32 [Homo sapiens]	common SCSs = 4		>NP_115971.2 ubiquitin carboxyl-terminal hydrolase 32	4
>NP_115997.5 unconventional myosin-XVIIIb isoform 2 [Homo sapiens]	common SCSs = 4		>NP_115997.5 unconventional myosin-XVIIIb isoform 2	4
>NP_116171.3 hepatitis A virus cellular receptor 2 precursor [Homo sapiens]	common SCSs = 4		>NP_116171.3 hepatitis A virus cellular receptor 2 precursor	4
>NP_116750.1 protocadherin-11 X-linked isoform c precursor [Homo sapiens]	common SCSs = 4		>NP_116750.1 protocadherin-11 X-linked isoform c precursor	4
>NP_116751.1 protocadherin-11 X-linked isoform d precursor [Homo sapiens]	common SCSs = 4		>NP_116751.1 protocadherin-11 X-linked isoform d precursor	4
>NP_116755.1 protocadherin-11 Y-linked isoform c precursor [Homo sapiens]	common SCSs = 4		>NP_116755.1 protocadherin-11 Y-linked isoform c precursor	4
>NP_149075.2 Fanconi anemia group D2 protein isoform a [Homo sapiens]	common SCSs = 4		>NP_149075.2 Fanconi anemia group D2 protein isoform a	4
>NP_208384.3 helicase with zinc finger domain 2 isoform 2 [Homo sapiens]	common SCSs = 4		>NP_208384.3 helicase with zinc finger domain 2 isoform 2	4
>NP_277045.1 protein dispatched homolog 2 [Homo sapiens]	common SCSs = 4		>NP_277045.1 protein dispatched homolog 2	4
>NP_443080.1 coiled-coil domain-containing protein 97 isoform 1 [Homo sapiens]	common SCSs = 4		>NP_443080.1 coiled-coil domain-containing protein 97 isoform 1	4
>NP_525021.3 ATP-binding cassette sub-family A member 10 [Homo sapiens]	common SCSs = 4		>NP_525021.3 ATP-binding cassette sub-family A member 10	4
>NP_596870.2 titin isoform novex-3 [Homo sapiens]	common SCSs = 4		>NP_596870.2 titin isoform novex-3	4
>NP_599025.2 solute carrier family 26 member 6 isoform 2 [Homo sapiens]	common SCSs = 4		>NP_599025.2 solute carrier family 26 member 6 isoform 2	4
>NP_602298.2 solute carrier family 26 member 6 isoform 3 [Homo sapiens]	common SCSs = 4		>NP_602298.2 solute carrier family 26 member 6 isoform 3	4
>NP_612429.2 protein AHNAK2 isoform 1 [Homo sapiens]	common SCSs = 4		>NP_612429.2 protein AHNAK2 isoform 1	4
>NP_624358.2 nuclear pore complex protein Nup98-Nup96 isoform 4 [Homo sapiens]	common SCSs = 4		>NP_624358.2 nuclear pore complex protein Nup98-Nup96 isoform 4	4
>NP_653091.3 kinetochore scaffold 1 isoform 2 [Homo sapiens]	common SCSs = 4		>NP_653091.3 kinetochore scaffold 1 isoform 2	4
>NP_653273.3 otoancorin isoform 1 precursor [Homo sapiens]	common SCSs = 4		>NP_653273.3 otoancorin isoform 1 precursor	4
>NP_660093.2 neuron navigator 2 isoform 2 [Homo sapiens]	common SCSs = 4		>NP_660093.2 neuron navigator 2 isoform 2	4
>NP_689594.4 xin actin-binding repeat-containing protein 2 isoform 1 [Homo sapiens]	common SCSs = 4		>NP_689594.4 xin actin-binding repeat-containing protein 2 isoform 1	4
>NP_689705.2 coiled-coil domain-containing protein 27 [Homo sapiens]	common SCSs = 4		>NP_689705.2 coiled-coil domain-containing protein 27	4
>NP_689909.2 homeodomain-interacting protein kinase 1 isoform 2 [Homo sapiens]	common SCSs = 4		>NP_689909.2 homeodomain-interacting protein kinase 1 isoform 2	4
>NP_694941.2 kinesin-like protein KIF19 [Homo sapiens]	common SCSs = 4		>NP_694941.2 kinesin-like protein KIF19	4
>NP_705833.3 very large A-kinase anchor protein [Homo sapiens]	common SCSs = 4		>NP_705833.3 very large A-kinase anchor protein	4
>NP_733468.3 kinetochore scaffold 1 isoform 1 [Homo sapiens]	common SCSs = 4		>NP_733468.3 kinetochore scaffold 1 isoform 1	4
>NP_733764.1 otoancorin isoform 2 [Homo sapiens]	common SCSs = 4		>NP_733764.1 otoancorin isoform 2	4
>NP_758859.1 histone-lysine N-methyltransferase, H3 lysine-36 specific isoform a [Homo sapiens]	common SCSs = 4		>NP_758859.1 histone-lysine N-methyltransferase, H3 lysine-36 specific isoform a	4
>NP_775839.3 uromodulin-like 1 isoform 2 precursor [Homo sapiens]	common SCSs = 4		>NP_775839.3 uromodulin-like 1 isoform 2 precursor	4
>NP_775841.2 palmitoyltransferase ZDHHC23 isoform c [Homo sapiens]	common SCSs = 4		>NP_775841.2 palmitoyltransferase ZDHHC23 isoform c	4
>NP_778228.3 pleckstrin homology domain-containing family A member 7 isoform 2 [Homo sapiens]	common SCSs = 4		>NP_778228.3 pleckstrin homology domain-containing family A member 7 isoform 2	4
>NP_786944.1 glutamate receptor ionotropic, kainate 2 isoform 2 precursor [Homo sapiens]	common SCSs = 4		>NP_786944.1 glutamate receptor ionotropic, kainate 2 isoform 2 precursor	4
>NP_803875.2 fibrocystin-L precursor [Homo sapiens]	common SCSs = 4		>NP_803875.2 fibrocystin-L precursor	4
>NP_821075.1 stAR-related lipid transfer protein 13 isoform 2 [Homo sapiens]	common SCSs = 4		>NP_821075.1 stAR-related lipid transfer protein 13 isoform 2	4
>NP_835260.2 PDZ domain-containing protein 2 [Homo sapiens]	common SCSs = 4		>NP_835260.2 PDZ domain-containing protein 2	4
>NP_849195.2 neuronal PAS domain-containing protein 4 isoform 1 [Homo sapiens]	common SCSs = 4		>NP_849195.2 neuronal PAS domain-containing protein 4 isoform 1	4
>NP_891550.1 A disintegrin and metalloproteinase with thrombospondin motifs 9 isoform 1 preproprotein [Homo sapiens]	common SCSs = 4		>NP_891550.1 A disintegrin and metalloproteinase with thrombospondin motifs 9 isoform 1 preproprotein	4
>NP_892009.3 neuron navigator 2 isoform 1 [Homo sapiens]	common SCSs = 4		>NP_892009.3 neuron navigator 2 isoform 1	4
>NP_937762.2 laminin subunit alpha-3 isoform 1 precursor [Homo sapiens]	common SCSs = 4		>NP_937762.2 laminin subunit alpha-3 isoform 1 precursor	4
>NP_938009.1 homeodomain-interacting protein kinase 1 isoform 1 [Homo sapiens]	common SCSs = 4		>NP_938009.1 homeodomain-interacting protein kinase 1 isoform 1	4
>NP_940890.4 protein FAM83H [Homo sapiens]	common SCSs = 4		>NP_940890.4 protein FAM83H	4
>XP_005245084.1 protein PRRC2C isoform X15 [Homo sapiens]	common SCSs = 4		>XP_005245084.1 protein PRRC2C isoform X15	4
>XP_005245085.1 protein PRRC2C isoform X16 [Homo sapiens]	common SCSs = 4		>XP_005245085.1 protein PRRC2C isoform X16	4
>XP_005245086.1 protein PRRC2C isoform X17 [Homo sapiens]	common SCSs = 4		>XP_005245086.1 protein PRRC2C isoform X17	4
>XP_005245905.1 AT-hook DNA-binding motif-containing protein 1 isoform X1 [Homo sapiens]	common SCSs = 4		>XP_005245905.1 AT-hook DNA-binding motif-containing protein 1 isoform X1	4
>XP_005245906.1 AT-hook DNA-binding motif-containing protein 1 isoform X1 [Homo sapiens]	common SCSs = 4		>XP_005245906.1 AT-hook DNA-binding motif-containing protein 1 isoform X1	4
>XP_005245907.1 AT-hook DNA-binding motif-containing protein 1 isoform X1 [Homo sapiens]	common SCSs = 4		>XP_005245907.1 AT-hook DNA-binding motif-containing protein 1 isoform X1	4
>XP_005245908.1 AT-hook DNA-binding motif-containing protein 1 isoform X1 [Homo sapiens]	common SCSs = 4		>XP_005245908.1 AT-hook DNA-binding motif-containing protein 1 isoform X1	4
>XP_005245909.1 AT-hook DNA-binding motif-containing protein 1 isoform X1 [Homo sapiens]	common SCSs = 4		>XP_005245909.1 AT-hook DNA-binding motif-containing protein 1 isoform X1	4
>XP_005246647.1 nebulin isoform X1 [Homo sapiens]	common SCSs = 4		>XP_005246647.1 nebulin isoform X1	4
>XP_005246648.1 nebulin isoform X2 [Homo sapiens]	common SCSs = 4		>XP_005246648.1 nebulin isoform X2	4
>XP_005246649.1 nebulin isoform X5 [Homo sapiens]	common SCSs = 4		>XP_005246649.1 nebulin isoform X5	4
>XP_005246650.1 nebulin isoform X3 [Homo sapiens]	common SCSs = 4		>XP_005246650.1 nebulin isoform X3	4
>XP_005246651.1 nebulin isoform X4 [Homo sapiens]	common SCSs = 4		>XP_005246651.1 nebulin isoform X4	4
>XP_005246653.1 nebulin isoform X7 [Homo sapiens]	common SCSs = 4		>XP_005246653.1 nebulin isoform X7	4
>XP_005246654.1 nebulin isoform X9 [Homo sapiens]	common SCSs = 4		>XP_005246654.1 nebulin isoform X9	4
>XP_005246655.1 nebulin isoform X10 [Homo sapiens]	common SCSs = 4		>XP_005246655.1 nebulin isoform X10	4
>XP_005246656.1 nebulin isoform X11 [Homo sapiens]	common SCSs = 4		>XP_005246656.1 nebulin isoform X11	4
>XP_005246658.1 nebulin isoform X12 [Homo sapiens]	common SCSs = 4		>XP_005246658.1 nebulin isoform X12	4
>XP_005246659.1 nebulin isoform X13 [Homo sapiens]	common SCSs = 4		>XP_005246659.1 nebulin isoform X13	4
>XP_005246660.1 nebulin isoform X14 [Homo sapiens]	common SCSs = 4		>XP_005246660.1 nebulin isoform X14	4
>XP_005246661.1 nebulin isoform X15 [Homo sapiens]	common SCSs = 4		>XP_005246661.1 nebulin isoform X15	4
>XP_005246663.1 nebulin isoform X18 [Homo sapiens]	common SCSs = 4		>XP_005246663.1 nebulin isoform X18	4
>XP_005246665.1 nebulin isoform X22 [Homo sapiens]	common SCSs = 4		>XP_005246665.1 nebulin isoform X22	4
>XP_005246667.1 nebulin isoform X24 [Homo sapiens]	common SCSs = 4		>XP_005246667.1 nebulin isoform X24	4
>XP_005246668.1 nebulin isoform X25 [Homo sapiens]	common SCSs = 4		>XP_005246668.1 nebulin isoform X25	4
>XP_005246669.1 nebulin isoform X26 [Homo sapiens]	common SCSs = 4		>XP_005246669.1 nebulin isoform X26	4
>XP_005246670.1 nebulin isoform X27 [Homo sapiens]	common SCSs = 4		>XP_005246670.1 nebulin isoform X27	4
>XP_005246672.1 nebulin isoform X31 [Homo sapiens]	common SCSs = 4		>XP_005246672.1 nebulin isoform X31	4
>XP_005246674.1 nebulin isoform X35 [Homo sapiens]	common SCSs = 4		>XP_005246674.1 nebulin isoform X35	4
>XP_005247174.1 very large A-kinase anchor protein isoform X1 [Homo sapiens]	common SCSs = 4		>XP_005247174.1 very large A-kinase anchor protein isoform X1	4
>XP_005247326.1 palmitoyltransferase ZDHHC23 isoform X5 [Homo sapiens]	common SCSs = 4		>XP_005247326.1 palmitoyltransferase ZDHHC23 isoform X5	4
>XP_005248326.1 PDZ domain-containing protein 2 isoform X1 [Homo sapiens]	common SCSs = 4		>XP_005248326.1 PDZ domain-containing protein 2 isoform X1	4
>XP_005248328.1 PDZ domain-containing protein 2 isoform X5 [Homo sapiens]	common SCSs = 4		>XP_005248328.1 PDZ domain-containing protein 2 isoform X5	4
>XP_005248329.1 PDZ domain-containing protein 2 isoform X5 [Homo sapiens]	common SCSs = 4		>XP_005248329.1 PDZ domain-containing protein 2 isoform X5	4
>XP_005248403.1 ciliogenesis and planar polarity effector 1 isoform X2 [Homo sapiens]	common SCSs = 4		>XP_005248403.1 ciliogenesis and planar polarity effector 1 isoform X2	4
>XP_005248404.1 ciliogenesis and planar polarity effector 1 isoform X3 [Homo sapiens]	common SCSs = 4		>XP_005248404.1 ciliogenesis and planar polarity effector 1 isoform X3	4
>XP_005248406.1 ciliogenesis and planar polarity effector 1 isoform X6 [Homo sapiens]	common SCSs = 4		>XP_005248406.1 ciliogenesis and planar polarity effector 1 isoform X6	4
>XP_005248407.1 ciliogenesis and planar polarity effector 1 isoform X7 [Homo sapiens]	common SCSs = 4		>XP_005248407.1 ciliogenesis and planar polarity effector 1 isoform X7	4
>XP_005248731.1 centrosomal protein of 162 kDa isoform X1 [Homo sapiens]	common SCSs = 4		>XP_005248731.1 centrosomal protein of 162 kDa isoform X1	4
>XP_005248757.1 midasin isoform X5 [Homo sapiens]	common SCSs = 4		>XP_005248757.1 midasin isoform X5	4
>XP_005248770.1 filamin-A-interacting protein 1 isoform X1 [Homo sapiens]	common SCSs = 4		>XP_005248770.1 filamin-A-interacting protein 1 isoform X1	4
>XP_005248772.1 filamin-A-interacting protein 1 isoform X2 [Homo sapiens]	common SCSs = 4		>XP_005248772.1 filamin-A-interacting protein 1 isoform X2	4
>XP_005248786.1 PH-interacting protein isoform X1 [Homo sapiens]	common SCSs = 4		>XP_005248786.1 PH-interacting protein isoform X1	4
>XP_005249372.1 dystonin isoform X9 [Homo sapiens]	common SCSs = 4		>XP_005249372.1 dystonin isoform X9	4
>XP_005250977.1 matrilin-2 isoform X2 [Homo sapiens]	common SCSs = 4		>XP_005250977.1 matrilin-2 isoform X2	4
>XP_005254306.1 MAX gene-associated protein isoform X3 [Homo sapiens]	common SCSs = 4		>XP_005254306.1 MAX gene-associated protein isoform X3	4
>XP_005254309.1 MAX gene-associated protein isoform X6 [Homo sapiens]	common SCSs = 4		>XP_005254309.1 MAX gene-associated protein isoform X6	4
>XP_005254354.1 RNA polymerase II-associated protein 1 isoform X1 [Homo sapiens]	common SCSs = 4		>XP_005254354.1 RNA polymerase II-associated protein 1 isoform X1	4
>XP_005254861.1 inositol hexakisphosphate and diphosphoinositol-pentakisphosphate kinase 1 isoform X6 [Homo sapiens]	common SCSs = 4		>XP_005254861.1 inositol hexakisphosphate and diphosphoinositol-pentakisphosphate kinase 1 isoform X6	4
>XP_005255239.1 serine/threonine-protein kinase SMG1 isoform X1 [Homo sapiens]	common SCSs = 4		>XP_005255239.1 serine/threonine-protein kinase SMG1 isoform X1	4
>XP_005255240.1 serine/threonine-protein kinase SMG1 isoform X3 [Homo sapiens]	common SCSs = 4		>XP_005255240.1 serine/threonine-protein kinase SMG1 isoform X3	4
>XP_005255241.1 serine/threonine-protein kinase SMG1 isoform X4 [Homo sapiens]	common SCSs = 4		>XP_005255241.1 serine/threonine-protein kinase SMG1 isoform X4	4
>XP_005255916.3 genetic suppressor element 1 isoform X1 [Homo sapiens]	common SCSs = 4		>XP_005255916.3 genetic suppressor element 1 isoform X1	4
>XP_005255918.3 genetic suppressor element 1 isoform X3 [Homo sapiens]	common SCSs = 4		>XP_005255918.3 genetic suppressor element 1 isoform X3	4
>XP_005256012.1 carbohydrate sulfotransferase 6 isoform X1 [Homo sapiens]	common SCSs = 4		>XP_005256012.1 carbohydrate sulfotransferase 6 isoform X1	4
>XP_005256486.1 chromodomain-helicase-DNA-binding protein 3 isoform X7 [Homo sapiens]	common SCSs = 4		>XP_005256486.1 chromodomain-helicase-DNA-binding protein 3 isoform X7	4
>XP_005256923.1 nuclear receptor corepressor 1 isoform X1 [Homo sapiens]	common SCSs = 4		>XP_005256923.1 nuclear receptor corepressor 1 isoform X1	4
>XP_005256925.1 nuclear receptor corepressor 1 isoform X2 [Homo sapiens]	common SCSs = 4		>XP_005256925.1 nuclear receptor corepressor 1 isoform X2	4
>XP_005256928.1 nuclear receptor corepressor 1 isoform X4 [Homo sapiens]	common SCSs = 4		>XP_005256928.1 nuclear receptor corepressor 1 isoform X4	4
>XP_005256929.1 nuclear receptor corepressor 1 isoform X5 [Homo sapiens]	common SCSs = 4		>XP_005256929.1 nuclear receptor corepressor 1 isoform X5	4
>XP_005256931.1 nuclear receptor corepressor 1 isoform X8 [Homo sapiens]	common SCSs = 4		>XP_005256931.1 nuclear receptor corepressor 1 isoform X8	4
>XP_005256932.1 nuclear receptor corepressor 1 isoform X12 [Homo sapiens]	common SCSs = 4		>XP_005256932.1 nuclear receptor corepressor 1 isoform X12	4
>XP_005257086.1 kinesin-like protein KIF19 isoform X3 [Homo sapiens]	common SCSs = 4		>XP_005257086.1 kinesin-like protein KIF19 isoform X3	4
>XP_005257087.1 kinesin-like protein KIF19 isoform X6 [Homo sapiens]	common SCSs = 4		>XP_005257087.1 kinesin-like protein KIF19 isoform X6	4
>XP_005258411.1 FH1/FH2 domain-containing protein 3 isoform X12 [Homo sapiens]	common SCSs = 4		>XP_005258411.1 FH1/FH2 domain-containing protein 3 isoform X12	4
>XP_005258412.1 FH1/FH2 domain-containing protein 3 isoform X14 [Homo sapiens]	common SCSs = 4		>XP_005258412.1 FH1/FH2 domain-containing protein 3 isoform X14	4
>XP_005258890.1 BRD4-interacting chromatin-remodeling complex-associated protein isoform X1 [Homo sapiens]	common SCSs = 4		>XP_005258890.1 BRD4-interacting chromatin-remodeling complex-associated protein isoform X1	4
>XP_005259220.1 pleckstrin homology domain-containing family G member 2 isoform X2 [Homo sapiens]	common SCSs = 4		>XP_005259220.1 pleckstrin homology domain-containing family G member 2 isoform X2	4
>XP_005259343.1 symplekin isoform X1 [Homo sapiens]	common SCSs = 4		>XP_005259343.1 symplekin isoform X1	4
>XP_005260242.1 transcription factor-like 5 protein isoform X3 [Homo sapiens]	common SCSs = 4		>XP_005260242.1 transcription factor-like 5 protein isoform X3	4
>XP_005261120.1 nuclear receptor-interacting protein 1 isoform X1 [Homo sapiens]	common SCSs = 4		>XP_005261120.1 nuclear receptor-interacting protein 1 isoform X1	4
>XP_005261122.1 nuclear receptor-interacting protein 1 isoform X1 [Homo sapiens]	common SCSs = 4		>XP_005261122.1 nuclear receptor-interacting protein 1 isoform X1	4
>XP_005261850.1 uncharacterized protein KIAA1671 isoform X1 [Homo sapiens]	common SCSs = 4		>XP_005261850.1 uncharacterized protein KIAA1671 isoform X1	4
>XP_005261851.1 uncharacterized protein KIAA1671 isoform X1 [Homo sapiens]	common SCSs = 4		>XP_005261851.1 uncharacterized protein KIAA1671 isoform X1	4
>XP_005262399.1 SLIT and NTRK-like protein 2 isoform X1 [Homo sapiens]	common SCSs = 4		>XP_005262399.1 SLIT and NTRK-like protein 2 isoform X1	4
>XP_005262400.1 SLIT and NTRK-like protein 2 isoform X1 [Homo sapiens]	common SCSs = 4		>XP_005262400.1 SLIT and NTRK-like protein 2 isoform X1	4
>XP_005262401.1 SLIT and NTRK-like protein 2 isoform X1 [Homo sapiens]	common SCSs = 4		>XP_005262401.1 SLIT and NTRK-like protein 2 isoform X1	4
>XP_005262402.1 SLIT and NTRK-like protein 2 isoform X1 [Homo sapiens]	common SCSs = 4		>XP_005262402.1 SLIT and NTRK-like protein 2 isoform X1	4
>XP_005262891.1 protocadherin Fat 1 isoform X1 [Homo sapiens]	common SCSs = 4		>XP_005262891.1 protocadherin Fat 1 isoform X1	4
>XP_005262892.1 protocadherin Fat 1 isoform X1 [Homo sapiens]	common SCSs = 4		>XP_005262892.1 protocadherin Fat 1 isoform X1	4
>XP_005264475.1 girdin isoform X1 [Homo sapiens]	common SCSs = 4		>XP_005264475.1 girdin isoform X1	4
>XP_005265184.1 laminin subunit beta-2 isoform X1 [Homo sapiens]	common SCSs = 4		>XP_005265184.1 laminin subunit beta-2 isoform X1	4
>XP_005265360.1 histone-lysine N-methyltransferase SETD5 isoform X14 [Homo sapiens]	common SCSs = 4		>XP_005265360.1 histone-lysine N-methyltransferase SETD5 isoform X14	4
>XP_005266356.1 E3 ubiquitin-protein ligase MYCBP2 isoform X8 [Homo sapiens]	common SCSs = 4		>XP_005266356.1 E3 ubiquitin-protein ligase MYCBP2 isoform X8	4
>XP_005266403.1 neurobeachin isoform X6 [Homo sapiens]	common SCSs = 4		>XP_005266403.1 neurobeachin isoform X6	4
>XP_005267003.1 glutamate receptor ionotropic, kainate 2 isoform X4 [Homo sapiens]	common SCSs = 4		>XP_005267003.1 glutamate receptor ionotropic, kainate 2 isoform X4	4
>XP_005267038.1 laminin subunit alpha-2 isoform X1 [Homo sapiens]	common SCSs = 4		>XP_005267038.1 laminin subunit alpha-2 isoform X1	4
>XP_005267039.1 laminin subunit alpha-2 isoform X3 [Homo sapiens]	common SCSs = 4		>XP_005267039.1 laminin subunit alpha-2 isoform X3	4
>XP_005267040.2 laminin subunit alpha-4 isoform X1 [Homo sapiens]	common SCSs = 4		>XP_005267040.2 laminin subunit alpha-4 isoform X1	4
>XP_005267041.2 laminin subunit alpha-4 isoform X1 [Homo sapiens]	common SCSs = 4		>XP_005267041.2 laminin subunit alpha-4 isoform X1	4
>XP_005267119.1 NHS-like protein 1 isoform X2 [Homo sapiens]	common SCSs = 4		>XP_005267119.1 NHS-like protein 1 isoform X2	4
>XP_005267487.1 disheveled-associated activator of morphogenesis 1 isoform X1 [Homo sapiens]	common SCSs = 4		>XP_005267487.1 disheveled-associated activator of morphogenesis 1 isoform X1	4
>XP_005267488.1 disheveled-associated activator of morphogenesis 1 isoform X1 [Homo sapiens]	common SCSs = 4		>XP_005267488.1 disheveled-associated activator of morphogenesis 1 isoform X1	4
>XP_005267559.2 E3 ubiquitin-protein ligase HECTD1 isoform X1 [Homo sapiens]	common SCSs = 4		>XP_005267559.2 E3 ubiquitin-protein ligase HECTD1 isoform X1	4
>XP_005267573.1 signal-induced proliferation-associated 1-like protein 1 isoform X1 [Homo sapiens]	common SCSs = 4		>XP_005267573.1 signal-induced proliferation-associated 1-like protein 1 isoform X1	4
>XP_005267816.1 homeobox protein SIX4 isoform X1 [Homo sapiens]	common SCSs = 4		>XP_005267816.1 homeobox protein SIX4 isoform X1	4
>XP_005269107.1 nck-associated protein 5-like isoform X2 [Homo sapiens]	common SCSs = 4		>XP_005269107.1 nck-associated protein 5-like isoform X2	4
>XP_005269272.1 neuron navigator 3 isoform X3 [Homo sapiens]	common SCSs = 4		>XP_005269272.1 neuron navigator 3 isoform X3	4
>XP_005269814.1 Hermansky-Pudlak syndrome 1 protein isoform X2 [Homo sapiens]	common SCSs = 4		>XP_005269814.1 Hermansky-Pudlak syndrome 1 protein isoform X2	4
>XP_005269863.2 WASH complex subunit 2A isoform X1 [Homo sapiens]	common SCSs = 4		>XP_005269863.2 WASH complex subunit 2A isoform X1	4
>XP_005269864.2 WASH complex subunit 2A isoform X2 [Homo sapiens]	common SCSs = 4		>XP_005269864.2 WASH complex subunit 2A isoform X2	4
>XP_005270210.1 multimerin-2 isoform X1 [Homo sapiens]	common SCSs = 4		>XP_005270210.1 multimerin-2 isoform X1	4
>XP_005270333.1 disks large homolog 5 isoform X1 [Homo sapiens]	common SCSs = 4		>XP_005270333.1 disks large homolog 5 isoform X1	4
>XP_005270667.2 homeodomain-interacting protein kinase 1 isoform X1 [Homo sapiens]	common SCSs = 4		>XP_005270667.2 homeodomain-interacting protein kinase 1 isoform X1	4
>XP_005270668.2 homeodomain-interacting protein kinase 1 isoform X2 [Homo sapiens]	common SCSs = 4		>XP_005270668.2 homeodomain-interacting protein kinase 1 isoform X2	4
>XP_005270670.1 homeodomain-interacting protein kinase 1 isoform X5 [Homo sapiens]	common SCSs = 4		>XP_005270670.1 homeodomain-interacting protein kinase 1 isoform X5	4
>XP_005271575.1 glutamate receptor 4 isoform X1 [Homo sapiens]	common SCSs = 4		>XP_005271575.1 glutamate receptor 4 isoform X1	4
>XP_005271966.1 dmX-like protein 1 isoform X1 [Homo sapiens]	common SCSs = 4		>XP_005271966.1 dmX-like protein 1 isoform X1	4
>XP_005271969.1 dmX-like protein 1 isoform X3 [Homo sapiens]	common SCSs = 4		>XP_005271969.1 dmX-like protein 1 isoform X3	4
>XP_006710506.2 homeodomain-interacting protein kinase 1 isoform X3 [Homo sapiens]	common SCSs = 4		>XP_006710506.2 homeodomain-interacting protein kinase 1 isoform X3	4
>XP_006712019.1 dynein heavy chain 6, axonemal isoform X1 [Homo sapiens]	common SCSs = 4		>XP_006712019.1 dynein heavy chain 6, axonemal isoform X1	4
>XP_006712604.1 nebulin isoform X17 [Homo sapiens]	common SCSs = 4		>XP_006712604.1 nebulin isoform X17	4
>XP_006712605.1 nebulin isoform X20 [Homo sapiens]	common SCSs = 4		>XP_006712605.1 nebulin isoform X20	4
>XP_006712680.1 dedicator of cytokinesis protein 10 isoform X6 [Homo sapiens]	common SCSs = 4		>XP_006712680.1 dedicator of cytokinesis protein 10 isoform X6	4
>XP_006712877.1 protein TANC1 isoform X22 [Homo sapiens]	common SCSs = 4		>XP_006712877.1 protein TANC1 isoform X22	4
>XP_006713625.1 palmitoyltransferase ZDHHC23 isoform X3 [Homo sapiens]	common SCSs = 4		>XP_006713625.1 palmitoyltransferase ZDHHC23 isoform X3	4
>XP_006714202.1 protocadherin Fat 1 isoform X2 [Homo sapiens]	common SCSs = 4		>XP_006714202.1 protocadherin Fat 1 isoform X2	4
>XP_006714523.1 PDZ domain-containing protein 2 isoform X7 [Homo sapiens]	common SCSs = 4		>XP_006714523.1 PDZ domain-containing protein 2 isoform X7	4
>XP_006715443.1 centrosomal protein of 162 kDa isoform X2 [Homo sapiens]	common SCSs = 4		>XP_006715443.1 centrosomal protein of 162 kDa isoform X2	4
>XP_006715468.1 midasin isoform X4 [Homo sapiens]	common SCSs = 4		>XP_006715468.1 midasin isoform X4	4
>XP_006715809.1 anillin isoform X1 [Homo sapiens]	common SCSs = 4		>XP_006715809.1 anillin isoform X1	4
>XP_006715810.1 anillin isoform X4 [Homo sapiens]	common SCSs = 4		>XP_006715810.1 anillin isoform X4	4
>XP_006716300.1 myomesin-2 isoform X1 [Homo sapiens]	common SCSs = 4		>XP_006716300.1 myomesin-2 isoform X1	4
>XP_006717894.2 WASH complex subunit 2A isoform X6 [Homo sapiens]	common SCSs = 4		>XP_006717894.2 WASH complex subunit 2A isoform X6	4
>XP_006717948.1 1-phosphatidylinositol 4,5-bisphosphate phosphodiesterase epsilon-1 isoform X1 [Homo sapiens]	common SCSs = 4		>XP_006717948.1 1-phosphatidylinositol 4,5-bisphosphate phosphodiesterase epsilon-1 isoform X1	4
>XP_006717951.1 1-phosphatidylinositol 4,5-bisphosphate phosphodiesterase epsilon-1 isoform X2 [Homo sapiens]	common SCSs = 4		>XP_006717951.1 1-phosphatidylinositol 4,5-bisphosphate phosphodiesterase epsilon-1 isoform X2	4
>XP_006717952.1 1-phosphatidylinositol 4,5-bisphosphate phosphodiesterase epsilon-1 isoform X3 [Homo sapiens]	common SCSs = 4		>XP_006717952.1 1-phosphatidylinositol 4,5-bisphosphate phosphodiesterase epsilon-1 isoform X3	4
>XP_006718033.1 multimerin-2 isoform X1 [Homo sapiens]	common SCSs = 4		>XP_006718033.1 multimerin-2 isoform X1	4
>XP_006718120.1 disks large homolog 5 isoform X12 [Homo sapiens]	common SCSs = 4		>XP_006718120.1 disks large homolog 5 isoform X12	4
>XP_006718427.1 neuron navigator 2 isoform X3 [Homo sapiens]	common SCSs = 4		>XP_006718427.1 neuron navigator 2 isoform X3	4
>XP_006718428.1 neuron navigator 2 isoform X4 [Homo sapiens]	common SCSs = 4		>XP_006718428.1 neuron navigator 2 isoform X4	4
>XP_006718429.1 neuron navigator 2 isoform X11 [Homo sapiens]	common SCSs = 4		>XP_006718429.1 neuron navigator 2 isoform X11	4
>XP_006718886.1 glutamate receptor 4 isoform X2 [Homo sapiens]	common SCSs = 4		>XP_006718886.1 glutamate receptor 4 isoform X2	4
>XP_006718902.2 histone-lysine N-methyltransferase 2A isoform X5 [Homo sapiens]	common SCSs = 4		>XP_006718902.2 histone-lysine N-methyltransferase 2A isoform X5	4
>XP_006719690.1 protein FAM186B isoform X3 [Homo sapiens]	common SCSs = 4		>XP_006719690.1 protein FAM186B isoform X3	4
>XP_006719844.1 E3 ubiquitin-protein ligase MYCBP2 isoform X3 [Homo sapiens]	common SCSs = 4		>XP_006719844.1 E3 ubiquitin-protein ligase MYCBP2 isoform X3	4
>XP_006719848.1 E3 ubiquitin-protein ligase MYCBP2 isoform X10 [Homo sapiens]	common SCSs = 4		>XP_006719848.1 E3 ubiquitin-protein ligase MYCBP2 isoform X10	4
>XP_006719849.1 E3 ubiquitin-protein ligase MYCBP2 isoform X14 [Homo sapiens]	common SCSs = 4		>XP_006719849.1 E3 ubiquitin-protein ligase MYCBP2 isoform X14	4
>XP_006719851.1 E3 ubiquitin-protein ligase MYCBP2 isoform X16 [Homo sapiens]	common SCSs = 4		>XP_006719851.1 E3 ubiquitin-protein ligase MYCBP2 isoform X16	4
>XP_006719852.1 E3 ubiquitin-protein ligase MYCBP2 isoform X29 [Homo sapiens]	common SCSs = 4		>XP_006719852.1 E3 ubiquitin-protein ligase MYCBP2 isoform X29	4
>XP_006719866.1 neurobeachin isoform X3 [Homo sapiens]	common SCSs = 4		>XP_006719866.1 neurobeachin isoform X3	4
>XP_006719868.1 neurobeachin isoform X12 [Homo sapiens]	common SCSs = 4		>XP_006719868.1 neurobeachin isoform X12	4
>XP_006719869.1 neurobeachin isoform X5 [Homo sapiens]	common SCSs = 4		>XP_006719869.1 neurobeachin isoform X5	4
>XP_006720849.1 inositol hexakisphosphate and diphosphoinositol-pentakisphosphate kinase 1 isoform X8 [Homo sapiens]	common SCSs = 4		>XP_006720849.1 inositol hexakisphosphate and diphosphoinositol-pentakisphosphate kinase 1 isoform X8	4
>XP_006721269.1 hydrocephalus-inducing protein homolog isoform X6 [Homo sapiens]	common SCSs = 4		>XP_006721269.1 hydrocephalus-inducing protein homolog isoform X6	4
>XP_006721491.1 chromodomain-helicase-DNA-binding protein 3 isoform X14 [Homo sapiens]	common SCSs = 4		>XP_006721491.1 chromodomain-helicase-DNA-binding protein 3 isoform X14	4
>XP_006721664.1 nuclear receptor corepressor 1 isoform X1 [Homo sapiens]	common SCSs = 4		>XP_006721664.1 nuclear receptor corepressor 1 isoform X1	4
>XP_006721665.1 nuclear receptor corepressor 1 isoform X2 [Homo sapiens]	common SCSs = 4		>XP_006721665.1 nuclear receptor corepressor 1 isoform X2	4
>XP_006721666.1 nuclear receptor corepressor 1 isoform X6 [Homo sapiens]	common SCSs = 4		>XP_006721666.1 nuclear receptor corepressor 1 isoform X6	4
>XP_006721667.1 nuclear receptor corepressor 1 isoform X10 [Homo sapiens]	common SCSs = 4		>XP_006721667.1 nuclear receptor corepressor 1 isoform X10	4
>XP_006723397.1 pleckstrin homology domain-containing family G member 2 isoform X5 [Homo sapiens]	common SCSs = 4		>XP_006723397.1 pleckstrin homology domain-containing family G member 2 isoform X5	4
>XP_006723818.1 nuclear receptor coactivator 6 isoform X11 [Homo sapiens]	common SCSs = 4		>XP_006723818.1 nuclear receptor coactivator 6 isoform X11	4
>XP_006724409.1 uncharacterized protein KIAA1671 isoform X1 [Homo sapiens]	common SCSs = 4		>XP_006724409.1 uncharacterized protein KIAA1671 isoform X1	4
>XP_006724656.1 serine/threonine-protein kinase WNK3 isoform X4 [Homo sapiens]	common SCSs = 4		>XP_006724656.1 serine/threonine-protein kinase WNK3 isoform X4	4
>XP_011508454.1 uncharacterized protein C1orf105 isoform X1 [Homo sapiens]	common SCSs = 4		>XP_011508454.1 uncharacterized protein C1orf105 isoform X1	4
>XP_011509485.1 low-density lipoprotein receptor-related protein 2 isoform X1 [Homo sapiens]	common SCSs = 4		>XP_011509485.1 low-density lipoprotein receptor-related protein 2 isoform X1	4
>XP_011509486.1 low-density lipoprotein receptor-related protein 2 isoform X2 [Homo sapiens]	common SCSs = 4		>XP_011509486.1 low-density lipoprotein receptor-related protein 2 isoform X2	4
>XP_011509527.1 nebulin isoform X29 [Homo sapiens]	common SCSs = 4		>XP_011509527.1 nebulin isoform X29	4
>XP_011509528.1 nebulin isoform X34 [Homo sapiens]	common SCSs = 4		>XP_011509528.1 nebulin isoform X34	4
>XP_011509935.1 anaphase-promoting complex subunit 1 isoform X1 [Homo sapiens]	common SCSs = 4		>XP_011509935.1 anaphase-promoting complex subunit 1 isoform X1	4
>XP_011510360.1 protein TANC1 isoform X18 [Homo sapiens]	common SCSs = 4		>XP_011510360.1 protein TANC1 isoform X18	4
>XP_011510364.1 protein TANC1 isoform X23 [Homo sapiens]	common SCSs = 4		>XP_011510364.1 protein TANC1 isoform X23	4
>XP_011510920.1 palmitoyltransferase ZDHHC23 isoform X1 [Homo sapiens]	common SCSs = 4		>XP_011510920.1 palmitoyltransferase ZDHHC23 isoform X1	4
>XP_011510921.1 palmitoyltransferase ZDHHC23 isoform X4 [Homo sapiens]	common SCSs = 4		>XP_011510921.1 palmitoyltransferase ZDHHC23 isoform X4	4
>XP_011512140.1 anaphase-promoting complex subunit 4 isoform X1 [Homo sapiens]	common SCSs = 4		>XP_011512140.1 anaphase-promoting complex subunit 4 isoform X1	4
>XP_011512294.1 PDZ domain-containing protein 2 isoform X1 [Homo sapiens]	common SCSs = 4		>XP_011512294.1 PDZ domain-containing protein 2 isoform X1	4
>XP_011512295.1 PDZ domain-containing protein 2 isoform X1 [Homo sapiens]	common SCSs = 4		>XP_011512295.1 PDZ domain-containing protein 2 isoform X1	4
>XP_011512296.1 PDZ domain-containing protein 2 isoform X2 [Homo sapiens]	common SCSs = 4		>XP_011512296.1 PDZ domain-containing protein 2 isoform X2	4
>XP_011512297.1 PDZ domain-containing protein 2 isoform X3 [Homo sapiens]	common SCSs = 4		>XP_011512297.1 PDZ domain-containing protein 2 isoform X3	4
>XP_011512298.1 PDZ domain-containing protein 2 isoform X4 [Homo sapiens]	common SCSs = 4		>XP_011512298.1 PDZ domain-containing protein 2 isoform X4	4
>XP_011512301.1 little elongation complex subunit 1 isoform X1 [Homo sapiens]	common SCSs = 4		>XP_011512301.1 little elongation complex subunit 1 isoform X1	4
>XP_011512387.1 ciliogenesis and planar polarity effector 1 isoform X1 [Homo sapiens]	common SCSs = 4		>XP_011512387.1 ciliogenesis and planar polarity effector 1 isoform X1	4
>XP_011512388.1 ciliogenesis and planar polarity effector 1 isoform X1 [Homo sapiens]	common SCSs = 4		>XP_011512388.1 ciliogenesis and planar polarity effector 1 isoform X1	4
>XP_011512389.1 ciliogenesis and planar polarity effector 1 isoform X4 [Homo sapiens]	common SCSs = 4		>XP_011512389.1 ciliogenesis and planar polarity effector 1 isoform X4	4
>XP_011512390.1 ciliogenesis and planar polarity effector 1 isoform X5 [Homo sapiens]	common SCSs = 4		>XP_011512390.1 ciliogenesis and planar polarity effector 1 isoform X5	4
>XP_011512391.1 ciliogenesis and planar polarity effector 1 isoform X8 [Homo sapiens]	common SCSs = 4		>XP_011512391.1 ciliogenesis and planar polarity effector 1 isoform X8	4
>XP_011512392.1 ciliogenesis and planar polarity effector 1 isoform X10 [Homo sapiens]	common SCSs = 4		>XP_011512392.1 ciliogenesis and planar polarity effector 1 isoform X10	4
>XP_011512394.1 ciliogenesis and planar polarity effector 1 isoform X12 [Homo sapiens]	common SCSs = 4		>XP_011512394.1 ciliogenesis and planar polarity effector 1 isoform X12	4
>XP_011512986.1 fibrocystin isoform X7 [Homo sapiens]	common SCSs = 4		>XP_011512986.1 fibrocystin isoform X7	4
>XP_011512990.1 fibrocystin isoform X13 [Homo sapiens]	common SCSs = 4		>XP_011512990.1 fibrocystin isoform X13	4
>XP_011513126.1 dystonin isoform X7 [Homo sapiens]	common SCSs = 4		>XP_011513126.1 dystonin isoform X7	4
>XP_011513438.2 ATP-binding cassette sub-family A member 13 isoform X6 [Homo sapiens]	common SCSs = 4		>XP_011513438.2 ATP-binding cassette sub-family A member 13 isoform X6	4
>XP_011513440.1 ATP-binding cassette sub-family A member 13 isoform X8 [Homo sapiens]	common SCSs = 4		>XP_011513440.1 ATP-binding cassette sub-family A member 13 isoform X8	4
>XP_011513441.1 ATP-binding cassette sub-family A member 13 isoform X9 [Homo sapiens]	common SCSs = 4		>XP_011513441.1 ATP-binding cassette sub-family A member 13 isoform X9	4
>XP_011513443.1 ATP-binding cassette sub-family A member 13 isoform X12 [Homo sapiens]	common SCSs = 4		>XP_011513443.1 ATP-binding cassette sub-family A member 13 isoform X12	4
>XP_011513444.1 ATP-binding cassette sub-family A member 13 isoform X13 [Homo sapiens]	common SCSs = 4		>XP_011513444.1 ATP-binding cassette sub-family A member 13 isoform X13	4
>XP_011513445.1 ATP-binding cassette sub-family A member 13 isoform X14 [Homo sapiens]	common SCSs = 4		>XP_011513445.1 ATP-binding cassette sub-family A member 13 isoform X14	4
>XP_011513446.1 ATP-binding cassette sub-family A member 13 isoform X15 [Homo sapiens]	common SCSs = 4		>XP_011513446.1 ATP-binding cassette sub-family A member 13 isoform X15	4
>XP_011513447.1 ATP-binding cassette sub-family A member 13 isoform X16 [Homo sapiens]	common SCSs = 4		>XP_011513447.1 ATP-binding cassette sub-family A member 13 isoform X16	4
>XP_011513448.1 ATP-binding cassette sub-family A member 13 isoform X17 [Homo sapiens]	common SCSs = 4		>XP_011513448.1 ATP-binding cassette sub-family A member 13 isoform X17	4
>XP_011513449.1 ATP-binding cassette sub-family A member 13 isoform X18 [Homo sapiens]	common SCSs = 4		>XP_011513449.1 ATP-binding cassette sub-family A member 13 isoform X18	4
>XP_011513450.1 ATP-binding cassette sub-family A member 13 isoform X19 [Homo sapiens]	common SCSs = 4		>XP_011513450.1 ATP-binding cassette sub-family A member 13 isoform X19	4
>XP_011513451.1 ATP-binding cassette sub-family A member 13 isoform X20 [Homo sapiens]	common SCSs = 4		>XP_011513451.1 ATP-binding cassette sub-family A member 13 isoform X20	4
>XP_011514972.1 maltase-glucoamylase, intestinal isoform X1 [Homo sapiens]	common SCSs = 4		>XP_011514972.1 maltase-glucoamylase, intestinal isoform X1	4
>XP_011514973.1 maltase-glucoamylase, intestinal isoform X1 [Homo sapiens]	common SCSs = 4		>XP_011514973.1 maltase-glucoamylase, intestinal isoform X1	4
>XP_011514974.1 maltase-glucoamylase, intestinal isoform X1 [Homo sapiens]	common SCSs = 4		>XP_011514974.1 maltase-glucoamylase, intestinal isoform X1	4
>XP_011514975.1 maltase-glucoamylase, intestinal isoform X1 [Homo sapiens]	common SCSs = 4		>XP_011514975.1 maltase-glucoamylase, intestinal isoform X1	4
>XP_011514994.1 putative maltase-glucoamylase-like protein FLJ16351 isoform X1 [Homo sapiens]	common SCSs = 4		>XP_011514994.1 putative maltase-glucoamylase-like protein FLJ16351 isoform X1	4
>XP_011514995.1 putative maltase-glucoamylase-like protein FLJ16351 isoform X2 [Homo sapiens]	common SCSs = 4		>XP_011514995.1 putative maltase-glucoamylase-like protein FLJ16351 isoform X2	4
>XP_011514996.1 putative maltase-glucoamylase-like protein FLJ16351 isoform X3 [Homo sapiens]	common SCSs = 4		>XP_011514996.1 putative maltase-glucoamylase-like protein FLJ16351 isoform X3	4
>XP_011515520.1 maestro heat-like repeat-containing protein family member 6 isoform X5 [Homo sapiens]	common SCSs = 4		>XP_011515520.1 maestro heat-like repeat-containing protein family member 6 isoform X5	4
>XP_011515523.1 maestro heat-like repeat-containing protein family member 6 isoform X7 [Homo sapiens]	common SCSs = 4		>XP_011515523.1 maestro heat-like repeat-containing protein family member 6 isoform X7	4
>XP_011515673.1 fibrocystin-L isoform X2 [Homo sapiens]	common SCSs = 4		>XP_011515673.1 fibrocystin-L isoform X2	4
>XP_011515945.1 RB1-inducible coiled-coil protein 1 isoform X3 [Homo sapiens]	common SCSs = 4		>XP_011515945.1 RB1-inducible coiled-coil protein 1 isoform X3	4
>XP_011515946.1 RB1-inducible coiled-coil protein 1 isoform X7 [Homo sapiens]	common SCSs = 4		>XP_011515946.1 RB1-inducible coiled-coil protein 1 isoform X7	4
>XP_011515947.1 RB1-inducible coiled-coil protein 1 isoform X8 [Homo sapiens]	common SCSs = 4		>XP_011515947.1 RB1-inducible coiled-coil protein 1 isoform X8	4
>XP_011515948.1 RB1-inducible coiled-coil protein 1 isoform X10 [Homo sapiens]	common SCSs = 4		>XP_011515948.1 RB1-inducible coiled-coil protein 1 isoform X10	4
>XP_011515949.1 RB1-inducible coiled-coil protein 1 isoform X11 [Homo sapiens]	common SCSs = 4		>XP_011515949.1 RB1-inducible coiled-coil protein 1 isoform X11	4
>XP_011515984.1 protein unc-13 homolog B isoform X2 [Homo sapiens]	common SCSs = 4		>XP_011515984.1 protein unc-13 homolog B isoform X2	4
>XP_011515985.1 protein unc-13 homolog B isoform X3 [Homo sapiens]	common SCSs = 4		>XP_011515985.1 protein unc-13 homolog B isoform X3	4
>XP_011516767.1 hemicentin-2 isoform X1 [Homo sapiens]	common SCSs = 4		>XP_011516767.1 hemicentin-2 isoform X1	4
>XP_011516768.1 hemicentin-2 isoform X2 [Homo sapiens]	common SCSs = 4		>XP_011516768.1 hemicentin-2 isoform X2	4
>XP_011516769.1 hemicentin-2 isoform X3 [Homo sapiens]	common SCSs = 4		>XP_011516769.1 hemicentin-2 isoform X3	4
>XP_011516770.1 hemicentin-2 isoform X4 [Homo sapiens]	common SCSs = 4		>XP_011516770.1 hemicentin-2 isoform X4	4
>XP_011518746.1 neuron navigator 2 isoform X1 [Homo sapiens]	common SCSs = 4		>XP_011518746.1 neuron navigator 2 isoform X1	4
>XP_011518747.1 neuron navigator 2 isoform X2 [Homo sapiens]	common SCSs = 4		>XP_011518747.1 neuron navigator 2 isoform X2	4
>XP_011518748.1 neuron navigator 2 isoform X5 [Homo sapiens]	common SCSs = 4		>XP_011518748.1 neuron navigator 2 isoform X5	4
>XP_011518749.1 neuron navigator 2 isoform X6 [Homo sapiens]	common SCSs = 4		>XP_011518749.1 neuron navigator 2 isoform X6	4
>XP_011518750.1 neuron navigator 2 isoform X7 [Homo sapiens]	common SCSs = 4		>XP_011518750.1 neuron navigator 2 isoform X7	4
>XP_011518751.1 neuron navigator 2 isoform X8 [Homo sapiens]	common SCSs = 4		>XP_011518751.1 neuron navigator 2 isoform X8	4
>XP_011518752.1 neuron navigator 2 isoform X10 [Homo sapiens]	common SCSs = 4		>XP_011518752.1 neuron navigator 2 isoform X10	4
>XP_011518753.1 neuron navigator 2 isoform X14 [Homo sapiens]	common SCSs = 4		>XP_011518753.1 neuron navigator 2 isoform X14	4
>XP_011519260.1 IQ motif and SEC7 domain-containing protein 3 isoform X1 [Homo sapiens]	common SCSs = 4		>XP_011519260.1 IQ motif and SEC7 domain-containing protein 3 isoform X1	4
>XP_011520427.1 protein dispatched homolog 2 isoform X1 [Homo sapiens]	common SCSs = 4		>XP_011520427.1 protein dispatched homolog 2 isoform X1	4
>XP_011520551.1 inositol hexakisphosphate and diphosphoinositol-pentakisphosphate kinase 1 isoform X1 [Homo sapiens]	common SCSs = 4		>XP_011520551.1 inositol hexakisphosphate and diphosphoinositol-pentakisphosphate kinase 1 isoform X1	4
>XP_011520552.1 inositol hexakisphosphate and diphosphoinositol-pentakisphosphate kinase 1 isoform X1 [Homo sapiens]	common SCSs = 4		>XP_011520552.1 inositol hexakisphosphate and diphosphoinositol-pentakisphosphate kinase 1 isoform X1	4
>XP_011520554.1 inositol hexakisphosphate and diphosphoinositol-pentakisphosphate kinase 1 isoform X1 [Homo sapiens]	common SCSs = 4		>XP_011520554.1 inositol hexakisphosphate and diphosphoinositol-pentakisphosphate kinase 1 isoform X1	4
>XP_011520556.1 inositol hexakisphosphate and diphosphoinositol-pentakisphosphate kinase 1 isoform X1 [Homo sapiens]	common SCSs = 4		>XP_011520556.1 inositol hexakisphosphate and diphosphoinositol-pentakisphosphate kinase 1 isoform X1	4
>XP_011521387.1 carbohydrate sulfotransferase 6 isoform X1 [Homo sapiens]	common SCSs = 4		>XP_011521387.1 carbohydrate sulfotransferase 6 isoform X1	4
>XP_011521448.1 hydrocephalus-inducing protein homolog isoform X1 [Homo sapiens]	common SCSs = 4		>XP_011521448.1 hydrocephalus-inducing protein homolog isoform X1	4
>XP_011521449.1 hydrocephalus-inducing protein homolog isoform X2 [Homo sapiens]	common SCSs = 4		>XP_011521449.1 hydrocephalus-inducing protein homolog isoform X2	4
>XP_011521450.1 hydrocephalus-inducing protein homolog isoform X4 [Homo sapiens]	common SCSs = 4		>XP_011521450.1 hydrocephalus-inducing protein homolog isoform X4	4
>XP_011521453.1 hydrocephalus-inducing protein homolog isoform X5 [Homo sapiens]	common SCSs = 4		>XP_011521453.1 hydrocephalus-inducing protein homolog isoform X5	4
>XP_011521629.1 transport and Golgi organization protein 6 homolog isoform X1 [Homo sapiens]	common SCSs = 4		>XP_011521629.1 transport and Golgi organization protein 6 homolog isoform X1	4
>XP_011522385.1 nuclear receptor corepressor 1 isoform X1 [Homo sapiens]	common SCSs = 4		>XP_011522385.1 nuclear receptor corepressor 1 isoform X1	4
>XP_011522386.1 nuclear receptor corepressor 1 isoform X3 [Homo sapiens]	common SCSs = 4		>XP_011522386.1 nuclear receptor corepressor 1 isoform X3	4
>XP_011522387.1 nuclear receptor corepressor 1 isoform X13 [Homo sapiens]	common SCSs = 4		>XP_011522387.1 nuclear receptor corepressor 1 isoform X13	4
>XP_011522388.1 nuclear receptor corepressor 1 isoform X16 [Homo sapiens]	common SCSs = 4		>XP_011522388.1 nuclear receptor corepressor 1 isoform X16	4
>XP_011523216.1 protein sidekick-2 isoform X1 [Homo sapiens]	common SCSs = 4		>XP_011523216.1 protein sidekick-2 isoform X1	4
>XP_011523217.1 protein sidekick-2 isoform X2 [Homo sapiens]	common SCSs = 4		>XP_011523217.1 protein sidekick-2 isoform X2	4
>XP_011523673.1 ubiquitin carboxyl-terminal hydrolase 32 isoform X1 [Homo sapiens]	common SCSs = 4		>XP_011523673.1 ubiquitin carboxyl-terminal hydrolase 32 isoform X1	4
>XP_011523674.1 ubiquitin carboxyl-terminal hydrolase 32 isoform X2 [Homo sapiens]	common SCSs = 4		>XP_011523674.1 ubiquitin carboxyl-terminal hydrolase 32 isoform X2	4
>XP_011523675.1 ubiquitin carboxyl-terminal hydrolase 32 isoform X3 [Homo sapiens]	common SCSs = 4		>XP_011523675.1 ubiquitin carboxyl-terminal hydrolase 32 isoform X3	4
>XP_011523676.1 ubiquitin carboxyl-terminal hydrolase 32 isoform X4 [Homo sapiens]	common SCSs = 4		>XP_011523676.1 ubiquitin carboxyl-terminal hydrolase 32 isoform X4	4
>XP_011523677.1 ubiquitin carboxyl-terminal hydrolase 32 isoform X5 [Homo sapiens]	common SCSs = 4		>XP_011523677.1 ubiquitin carboxyl-terminal hydrolase 32 isoform X5	4
>XP_011523678.1 ubiquitin carboxyl-terminal hydrolase 32 isoform X6 [Homo sapiens]	common SCSs = 4		>XP_011523678.1 ubiquitin carboxyl-terminal hydrolase 32 isoform X6	4
>XP_011523680.1 ubiquitin carboxyl-terminal hydrolase 32 isoform X7 [Homo sapiens]	common SCSs = 4		>XP_011523680.1 ubiquitin carboxyl-terminal hydrolase 32 isoform X7	4
>XP_011524280.1 laminin subunit alpha-3 isoform X1 [Homo sapiens]	common SCSs = 4		>XP_011524280.1 laminin subunit alpha-3 isoform X1	4
>XP_011524281.1 laminin subunit alpha-3 isoform X2 [Homo sapiens]	common SCSs = 4		>XP_011524281.1 laminin subunit alpha-3 isoform X2	4
>XP_011524282.1 laminin subunit alpha-3 isoform X3 [Homo sapiens]	common SCSs = 4		>XP_011524282.1 laminin subunit alpha-3 isoform X3	4
>XP_011524283.1 laminin subunit alpha-3 isoform X4 [Homo sapiens]	common SCSs = 4		>XP_011524283.1 laminin subunit alpha-3 isoform X4	4
>XP_011524284.1 laminin subunit alpha-3 isoform X5 [Homo sapiens]	common SCSs = 4		>XP_011524284.1 laminin subunit alpha-3 isoform X5	4
>XP_011524498.1 FH1/FH2 domain-containing protein 3 isoform X10 [Homo sapiens]	common SCSs = 4		>XP_011524498.1 FH1/FH2 domain-containing protein 3 isoform X10	4
>XP_011525184.1 BRD4-interacting chromatin-remodeling complex-associated protein isoform X2 [Homo sapiens]	common SCSs = 4		>XP_011525184.1 BRD4-interacting chromatin-remodeling complex-associated protein isoform X2	4
>XP_011525185.1 BRD4-interacting chromatin-remodeling complex-associated protein isoform X3 [Homo sapiens]	common SCSs = 4		>XP_011525185.1 BRD4-interacting chromatin-remodeling complex-associated protein isoform X3	4
>XP_011525534.1 pleckstrin homology domain-containing family G member 2 isoform X1 [Homo sapiens]	common SCSs = 4		>XP_011525534.1 pleckstrin homology domain-containing family G member 2 isoform X1	4
>XP_011525656.1 symplekin isoform X1 [Homo sapiens]	common SCSs = 4		>XP_011525656.1 symplekin isoform X1	4
>XP_011526799.1 transcription factor-like 5 protein isoform X2 [Homo sapiens]	common SCSs = 4		>XP_011526799.1 transcription factor-like 5 protein isoform X2	4
>XP_011527023.1 nuclear receptor coactivator 6 isoform X4 [Homo sapiens]	common SCSs = 4		>XP_011527023.1 nuclear receptor coactivator 6 isoform X4	4
>XP_011527028.1 nuclear receptor coactivator 6 isoform X6 [Homo sapiens]	common SCSs = 4		>XP_011527028.1 nuclear receptor coactivator 6 isoform X6	4
>XP_011527029.1 nuclear receptor coactivator 6 isoform X7 [Homo sapiens]	common SCSs = 4		>XP_011527029.1 nuclear receptor coactivator 6 isoform X7	4
>XP_011528049.1 nuclear receptor-interacting protein 1 isoform X1 [Homo sapiens]	common SCSs = 4		>XP_011528049.1 nuclear receptor-interacting protein 1 isoform X1	4
>XP_011528050.1 nuclear receptor-interacting protein 1 isoform X1 [Homo sapiens]	common SCSs = 4		>XP_011528050.1 nuclear receptor-interacting protein 1 isoform X1	4
>XP_011528051.1 nuclear receptor-interacting protein 1 isoform X1 [Homo sapiens]	common SCSs = 4		>XP_011528051.1 nuclear receptor-interacting protein 1 isoform X1	4
>XP_011528053.1 nuclear receptor-interacting protein 1 isoform X1 [Homo sapiens]	common SCSs = 4		>XP_011528053.1 nuclear receptor-interacting protein 1 isoform X1	4
>XP_011528054.1 nuclear receptor-interacting protein 1 isoform X1 [Homo sapiens]	common SCSs = 4		>XP_011528054.1 nuclear receptor-interacting protein 1 isoform X1	4
>XP_011528099.1 uromodulin-like 1 isoform X3 [Homo sapiens]	common SCSs = 4		>XP_011528099.1 uromodulin-like 1 isoform X3	4
>XP_011528760.1 unconventional myosin-XVIIIb isoform X1 [Homo sapiens]	common SCSs = 4		>XP_011528760.1 unconventional myosin-XVIIIb isoform X1	4
>XP_011528761.1 unconventional myosin-XVIIIb isoform X1 [Homo sapiens]	common SCSs = 4		>XP_011528761.1 unconventional myosin-XVIIIb isoform X1	4
>XP_011528762.1 unconventional myosin-XVIIIb isoform X2 [Homo sapiens]	common SCSs = 4		>XP_011528762.1 unconventional myosin-XVIIIb isoform X2	4
>XP_011528763.1 unconventional myosin-XVIIIb isoform X1 [Homo sapiens]	common SCSs = 4		>XP_011528763.1 unconventional myosin-XVIIIb isoform X1	4
>XP_011528766.1 unconventional myosin-XVIIIb isoform X3 [Homo sapiens]	common SCSs = 4		>XP_011528766.1 unconventional myosin-XVIIIb isoform X3	4
>XP_011528768.1 unconventional myosin-XVIIIb isoform X7 [Homo sapiens]	common SCSs = 4		>XP_011528768.1 unconventional myosin-XVIIIb isoform X7	4
>XP_011529104.1 serine/threonine-protein kinase WNK3 isoform X3 [Homo sapiens]	common SCSs = 4		>XP_011529104.1 serine/threonine-protein kinase WNK3 isoform X3	4
>XP_011529212.1 protocadherin-11 X-linked isoform X2 [Homo sapiens]	common SCSs = 4		>XP_011529212.1 protocadherin-11 X-linked isoform X2	4
>XP_011529213.1 protocadherin-11 X-linked isoform X2 [Homo sapiens]	common SCSs = 4		>XP_011529213.1 protocadherin-11 X-linked isoform X2	4
>XP_011529214.1 protocadherin-11 X-linked isoform X3 [Homo sapiens]	common SCSs = 4		>XP_011529214.1 protocadherin-11 X-linked isoform X3	4
>XP_011529215.1 protocadherin-11 X-linked isoform X5 [Homo sapiens]	common SCSs = 4		>XP_011529215.1 protocadherin-11 X-linked isoform X5	4
>XP_011529216.1 protocadherin-11 X-linked isoform X6 [Homo sapiens]	common SCSs = 4		>XP_011529216.1 protocadherin-11 X-linked isoform X6	4
>XP_011530360.2 la-related protein 1B isoform X3 [Homo sapiens]	common SCSs = 4		>XP_011530360.2 la-related protein 1B isoform X3	4
>XP_011530361.2 la-related protein 1B isoform X4 [Homo sapiens]	common SCSs = 4		>XP_011530361.2 la-related protein 1B isoform X4	4
>XP_011530362.2 la-related protein 1B isoform X6 [Homo sapiens]	common SCSs = 4		>XP_011530362.2 la-related protein 1B isoform X6	4
>XP_011530363.1 la-related protein 1B isoform X7 [Homo sapiens]	common SCSs = 4		>XP_011530363.1 la-related protein 1B isoform X7	4
>XP_011530364.2 la-related protein 1B isoform X8 [Homo sapiens]	common SCSs = 4		>XP_011530364.2 la-related protein 1B isoform X8	4
>XP_011530365.2 la-related protein 1B isoform X9 [Homo sapiens]	common SCSs = 4		>XP_011530365.2 la-related protein 1B isoform X9	4
>XP_011530366.2 la-related protein 1B isoform X10 [Homo sapiens]	common SCSs = 4		>XP_011530366.2 la-related protein 1B isoform X10	4
>XP_011530367.1 la-related protein 1B isoform X11 [Homo sapiens]	common SCSs = 4		>XP_011530367.1 la-related protein 1B isoform X11	4
>XP_011530951.1 dynein heavy chain 6, axonemal isoform X1 [Homo sapiens]	common SCSs = 4		>XP_011530951.1 dynein heavy chain 6, axonemal isoform X1	4
>XP_011530952.1 dynein heavy chain 6, axonemal isoform X1 [Homo sapiens]	common SCSs = 4		>XP_011530952.1 dynein heavy chain 6, axonemal isoform X1	4
>XP_011530954.1 dynein heavy chain 6, axonemal isoform X2 [Homo sapiens]	common SCSs = 4		>XP_011530954.1 dynein heavy chain 6, axonemal isoform X2	4
>XP_011530955.1 dynein heavy chain 6, axonemal isoform X3 [Homo sapiens]	common SCSs = 4		>XP_011530955.1 dynein heavy chain 6, axonemal isoform X3	4
>XP_011530956.1 dynein heavy chain 6, axonemal isoform X5 [Homo sapiens]	common SCSs = 4		>XP_011530956.1 dynein heavy chain 6, axonemal isoform X5	4
>XP_011530957.1 dynein heavy chain 6, axonemal isoform X6 [Homo sapiens]	common SCSs = 4		>XP_011530957.1 dynein heavy chain 6, axonemal isoform X6	4
>XP_011530959.1 dynein heavy chain 6, axonemal isoform X7 [Homo sapiens]	common SCSs = 4		>XP_011530959.1 dynein heavy chain 6, axonemal isoform X7	4
>XP_011531305.1 baculoviral IAP repeat-containing protein 6 isoform X14 [Homo sapiens]	common SCSs = 4		>XP_011531305.1 baculoviral IAP repeat-containing protein 6 isoform X14	4
>XP_011531307.1 baculoviral IAP repeat-containing protein 6 isoform X16 [Homo sapiens]	common SCSs = 4		>XP_011531307.1 baculoviral IAP repeat-containing protein 6 isoform X16	4
>XP_011531769.1 dynein heavy chain 12, axonemal isoform X2 [Homo sapiens]	common SCSs = 4		>XP_011531769.1 dynein heavy chain 12, axonemal isoform X2	4
>XP_011531770.1 dynein heavy chain 12, axonemal isoform X3 [Homo sapiens]	common SCSs = 4		>XP_011531770.1 dynein heavy chain 12, axonemal isoform X3	4
>XP_011531771.1 dynein heavy chain 12, axonemal isoform X4 [Homo sapiens]	common SCSs = 4		>XP_011531771.1 dynein heavy chain 12, axonemal isoform X4	4
>XP_011532005.1 microtubule-associated protein 4 isoform X2 [Homo sapiens]	common SCSs = 4		>XP_011532005.1 microtubule-associated protein 4 isoform X2	4
>XP_011532006.1 microtubule-associated protein 4 isoform X3 [Homo sapiens]	common SCSs = 4		>XP_011532006.1 microtubule-associated protein 4 isoform X3	4
>XP_011532007.1 microtubule-associated protein 4 isoform X5 [Homo sapiens]	common SCSs = 4		>XP_011532007.1 microtubule-associated protein 4 isoform X5	4
>XP_011532010.1 microtubule-associated protein 4 isoform X7 [Homo sapiens]	common SCSs = 4		>XP_011532010.1 microtubule-associated protein 4 isoform X7	4
>XP_011532011.1 microtubule-associated protein 4 isoform X9 [Homo sapiens]	common SCSs = 4		>XP_011532011.1 microtubule-associated protein 4 isoform X9	4
>XP_011532020.1 microtubule-associated protein 4 isoform X14 [Homo sapiens]	common SCSs = 4		>XP_011532020.1 microtubule-associated protein 4 isoform X14	4
>XP_011532222.1 histone-lysine N-methyltransferase SETD5 isoform X1 [Homo sapiens]	common SCSs = 4		>XP_011532222.1 histone-lysine N-methyltransferase SETD5 isoform X1	4
>XP_011532223.1 histone-lysine N-methyltransferase SETD5 isoform X1 [Homo sapiens]	common SCSs = 4		>XP_011532223.1 histone-lysine N-methyltransferase SETD5 isoform X1	4
>XP_011532229.1 histone-lysine N-methyltransferase SETD5 isoform X5 [Homo sapiens]	common SCSs = 4		>XP_011532229.1 histone-lysine N-methyltransferase SETD5 isoform X5	4
>XP_011532232.1 histone-lysine N-methyltransferase SETD5 isoform X12 [Homo sapiens]	common SCSs = 4		>XP_011532232.1 histone-lysine N-methyltransferase SETD5 isoform X12	4
>XP_011532234.1 histone-lysine N-methyltransferase SETD5 isoform X17 [Homo sapiens]	common SCSs = 4		>XP_011532234.1 histone-lysine N-methyltransferase SETD5 isoform X17	4
>XP_011532235.1 histone-lysine N-methyltransferase SETD5 isoform X17 [Homo sapiens]	common SCSs = 4		>XP_011532235.1 histone-lysine N-methyltransferase SETD5 isoform X17	4
>XP_011533348.1 neurobeachin isoform X10 [Homo sapiens]	common SCSs = 4		>XP_011533348.1 neurobeachin isoform X10	4
>XP_011533426.1 M-phase phosphoprotein 8 isoform X1 [Homo sapiens]	common SCSs = 4		>XP_011533426.1 M-phase phosphoprotein 8 isoform X1	4
>XP_011533937.1 midasin isoform X1 [Homo sapiens]	common SCSs = 4		>XP_011533937.1 midasin isoform X1	4
>XP_011534058.1 filamin-A-interacting protein 1 isoform X3 [Homo sapiens]	common SCSs = 4		>XP_011534058.1 filamin-A-interacting protein 1 isoform X3	4
>XP_011534079.1 glutamate receptor ionotropic, kainate 2 isoform X2 [Homo sapiens]	common SCSs = 4		>XP_011534079.1 glutamate receptor ionotropic, kainate 2 isoform X2	4
>XP_011534122.1 laminin subunit alpha-2 isoform X2 [Homo sapiens]	common SCSs = 4		>XP_011534122.1 laminin subunit alpha-2 isoform X2	4
>XP_011534220.1 PH-interacting protein isoform X2 [Homo sapiens]	common SCSs = 4		>XP_011534220.1 PH-interacting protein isoform X2	4
>XP_011534268.1 NHS-like protein 1 isoform X1 [Homo sapiens]	common SCSs = 4		>XP_011534268.1 NHS-like protein 1 isoform X1	4
>XP_011534269.1 NHS-like protein 1 isoform X1 [Homo sapiens]	common SCSs = 4		>XP_011534269.1 NHS-like protein 1 isoform X1	4
>XP_011534271.1 NHS-like protein 1 isoform X5 [Homo sapiens]	common SCSs = 4		>XP_011534271.1 NHS-like protein 1 isoform X5	4
>XP_011534272.1 NHS-like protein 1 isoform X6 [Homo sapiens]	common SCSs = 4		>XP_011534272.1 NHS-like protein 1 isoform X6	4
>XP_011534273.1 NHS-like protein 1 isoform X8 [Homo sapiens]	common SCSs = 4		>XP_011534273.1 NHS-like protein 1 isoform X8	4
>XP_011534274.1 NHS-like protein 1 isoform X9 [Homo sapiens]	common SCSs = 4		>XP_011534274.1 NHS-like protein 1 isoform X9	4
>XP_011534275.1 NHS-like protein 1 isoform X10 [Homo sapiens]	common SCSs = 4		>XP_011534275.1 NHS-like protein 1 isoform X10	4
>XP_011534276.1 NHS-like protein 1 isoform X11 [Homo sapiens]	common SCSs = 4		>XP_011534276.1 NHS-like protein 1 isoform X11	4
>XP_011534278.1 NHS-like protein 1 isoform X13 [Homo sapiens]	common SCSs = 4		>XP_011534278.1 NHS-like protein 1 isoform X13	4
>XP_011534338.1 DNA polymerase zeta catalytic subunit isoform X6 [Homo sapiens]	common SCSs = 4		>XP_011534338.1 DNA polymerase zeta catalytic subunit isoform X6	4
>XP_011534921.1 E3 ubiquitin-protein ligase HECTD1 isoform X2 [Homo sapiens]	common SCSs = 4		>XP_011534921.1 E3 ubiquitin-protein ligase HECTD1 isoform X2	4
>XP_011534923.1 E3 ubiquitin-protein ligase HECTD1 isoform X6 [Homo sapiens]	common SCSs = 4		>XP_011534923.1 E3 ubiquitin-protein ligase HECTD1 isoform X6	4
>XP_011534932.1 signal-induced proliferation-associated 1-like protein 1 isoform X1 [Homo sapiens]	common SCSs = 4		>XP_011534932.1 signal-induced proliferation-associated 1-like protein 1 isoform X1	4
>XP_011534933.1 signal-induced proliferation-associated 1-like protein 1 isoform X1 [Homo sapiens]	common SCSs = 4		>XP_011534933.1 signal-induced proliferation-associated 1-like protein 1 isoform X1	4
>XP_011534934.1 signal-induced proliferation-associated 1-like protein 1 isoform X1 [Homo sapiens]	common SCSs = 4		>XP_011534934.1 signal-induced proliferation-associated 1-like protein 1 isoform X1	4
>XP_011534937.1 signal-induced proliferation-associated 1-like protein 1 isoform X1 [Homo sapiens]	common SCSs = 4		>XP_011534937.1 signal-induced proliferation-associated 1-like protein 1 isoform X1	4
>XP_011536375.1 WASH complex subunit 4 isoform X1 [Homo sapiens]	common SCSs = 4		>XP_011536375.1 WASH complex subunit 4 isoform X1	4
>XP_011536376.1 WASH complex subunit 4 isoform X2 [Homo sapiens]	common SCSs = 4		>XP_011536376.1 WASH complex subunit 4 isoform X2	4
>XP_011536379.1 WASH complex subunit 4 isoform X4 [Homo sapiens]	common SCSs = 4		>XP_011536379.1 WASH complex subunit 4 isoform X4	4
>XP_011537056.1 A disintegrin and metalloproteinase with thrombospondin motifs 20 isoform X1 [Homo sapiens]	common SCSs = 4		>XP_011537056.1 A disintegrin and metalloproteinase with thrombospondin motifs 20 isoform X1	4
>XP_011537242.1 neuron navigator 3 isoform X4 [Homo sapiens]	common SCSs = 4		>XP_011537242.1 neuron navigator 3 isoform X4	4
>XP_011537243.1 neuron navigator 3 isoform X5 [Homo sapiens]	common SCSs = 4		>XP_011537243.1 neuron navigator 3 isoform X5	4
>XP_011537246.1 neuron navigator 3 isoform X10 [Homo sapiens]	common SCSs = 4		>XP_011537246.1 neuron navigator 3 isoform X10	4
>XP_011537442.1 sorbin and SH3 domain-containing protein 1 isoform X1 [Homo sapiens]	common SCSs = 4		>XP_011537442.1 sorbin and SH3 domain-containing protein 1 isoform X1	4
>XP_011537452.1 sorbin and SH3 domain-containing protein 1 isoform X2 [Homo sapiens]	common SCSs = 4		>XP_011537452.1 sorbin and SH3 domain-containing protein 1 isoform X2	4
>XP_011537457.1 sorbin and SH3 domain-containing protein 1 isoform X3 [Homo sapiens]	common SCSs = 4		>XP_011537457.1 sorbin and SH3 domain-containing protein 1 isoform X3	4
>XP_011537469.1 sorbin and SH3 domain-containing protein 1 isoform X13 [Homo sapiens]	common SCSs = 4		>XP_011537469.1 sorbin and SH3 domain-containing protein 1 isoform X13	4
>XP_011537501.1 VPS10 domain-containing receptor SorCS1 isoform X2 [Homo sapiens]	common SCSs = 4		>XP_011537501.1 VPS10 domain-containing receptor SorCS1 isoform X2	4
>XP_011537870.1 WASH complex subunit 2C isoform X2 [Homo sapiens]	common SCSs = 4		>XP_011537870.1 WASH complex subunit 2C isoform X2	4
>XP_011537871.1 WASH complex subunit 2C isoform X6 [Homo sapiens]	common SCSs = 4		>XP_011537871.1 WASH complex subunit 2C isoform X6	4
>XP_011537872.1 WASH complex subunit 2C isoform X8 [Homo sapiens]	common SCSs = 4		>XP_011537872.1 WASH complex subunit 2C isoform X8	4
>XP_011538050.1 lipase member M isoform X1 [Homo sapiens]	common SCSs = 4		>XP_011538050.1 lipase member M isoform X1	4
>XP_011538151.1 1-phosphatidylinositol 4,5-bisphosphate phosphodiesterase epsilon-1 isoform X1 [Homo sapiens]	common SCSs = 4		>XP_011538151.1 1-phosphatidylinositol 4,5-bisphosphate phosphodiesterase epsilon-1 isoform X1	4
>XP_011538292.1 WD repeat- and FYVE domain-containing protein 4 isoform X4 [Homo sapiens]	common SCSs = 4		>XP_011538292.1 WD repeat- and FYVE domain-containing protein 4 isoform X4	4
>XP_011538293.1 WD repeat- and FYVE domain-containing protein 4 isoform X5 [Homo sapiens]	common SCSs = 4		>XP_011538293.1 WD repeat- and FYVE domain-containing protein 4 isoform X5	4
>XP_011538294.1 WD repeat- and FYVE domain-containing protein 4 isoform X7 [Homo sapiens]	common SCSs = 4		>XP_011538294.1 WD repeat- and FYVE domain-containing protein 4 isoform X7	4
>XP_011538643.1 disks large homolog 5 isoform X2 [Homo sapiens]	common SCSs = 4		>XP_011538643.1 disks large homolog 5 isoform X2	4
>XP_011538644.1 disks large homolog 5 isoform X3 [Homo sapiens]	common SCSs = 4		>XP_011538644.1 disks large homolog 5 isoform X3	4
>XP_011538646.1 disks large homolog 5 isoform X6 [Homo sapiens]	common SCSs = 4		>XP_011538646.1 disks large homolog 5 isoform X6	4
>XP_011538648.1 disks large homolog 5 isoform X8 [Homo sapiens]	common SCSs = 4		>XP_011538648.1 disks large homolog 5 isoform X8	4
>XP_011539082.1 coiled-coil domain-containing protein 27 isoform X4 [Homo sapiens]	common SCSs = 4		>XP_011539082.1 coiled-coil domain-containing protein 27 isoform X4	4
>XP_011539114.1 coiled-coil domain-containing protein 17 isoform X1 [Homo sapiens]	common SCSs = 4		>XP_011539114.1 coiled-coil domain-containing protein 17 isoform X1	4
>XP_011539116.1 coiled-coil domain-containing protein 17 isoform X3 [Homo sapiens]	common SCSs = 4		>XP_011539116.1 coiled-coil domain-containing protein 17 isoform X3	4
>XP_011539122.1 coiled-coil domain-containing protein 17 isoform X9 [Homo sapiens]	common SCSs = 4		>XP_011539122.1 coiled-coil domain-containing protein 17 isoform X9	4
>XP_011539279.2 homeodomain-interacting protein kinase 1 isoform X4 [Homo sapiens]	common SCSs = 4		>XP_011539279.2 homeodomain-interacting protein kinase 1 isoform X4	4
>XP_011539557.1 AT-hook DNA-binding motif-containing protein 1 isoform X1 [Homo sapiens]	common SCSs = 4		>XP_011539557.1 AT-hook DNA-binding motif-containing protein 1 isoform X1	4
>XP_011539558.1 AT-hook DNA-binding motif-containing protein 1 isoform X1 [Homo sapiens]	common SCSs = 4		>XP_011539558.1 AT-hook DNA-binding motif-containing protein 1 isoform X1	4
>XP_011539559.1 AT-hook DNA-binding motif-containing protein 1 isoform X1 [Homo sapiens]	common SCSs = 4		>XP_011539559.1 AT-hook DNA-binding motif-containing protein 1 isoform X1	4
>XP_011539841.1 enoyl-[acyl-carrier-protein] reductase, mitochondrial isoform X1 [Homo sapiens]	common SCSs = 4		>XP_011539841.1 enoyl-[acyl-carrier-protein] reductase, mitochondrial isoform X1	4
>XP_011539842.1 enoyl-[acyl-carrier-protein] reductase, mitochondrial isoform X2 [Homo sapiens]	common SCSs = 4		>XP_011539842.1 enoyl-[acyl-carrier-protein] reductase, mitochondrial isoform X2	4
>XP_011539845.1 enoyl-[acyl-carrier-protein] reductase, mitochondrial isoform X4 [Homo sapiens]	common SCSs = 4		>XP_011539845.1 enoyl-[acyl-carrier-protein] reductase, mitochondrial isoform X4	4
>XP_011539847.1 enoyl-[acyl-carrier-protein] reductase, mitochondrial isoform X4 [Homo sapiens]	common SCSs = 4		>XP_011539847.1 enoyl-[acyl-carrier-protein] reductase, mitochondrial isoform X4	4
>XP_011539848.1 enoyl-[acyl-carrier-protein] reductase, mitochondrial isoform X4 [Homo sapiens]	common SCSs = 4		>XP_011539848.1 enoyl-[acyl-carrier-protein] reductase, mitochondrial isoform X4	4
>XP_011539849.1 enoyl-[acyl-carrier-protein] reductase, mitochondrial isoform X4 [Homo sapiens]	common SCSs = 4		>XP_011539849.1 enoyl-[acyl-carrier-protein] reductase, mitochondrial isoform X4	4
>XP_011539851.1 enoyl-[acyl-carrier-protein] reductase, mitochondrial isoform X4 [Homo sapiens]	common SCSs = 4		>XP_011539851.1 enoyl-[acyl-carrier-protein] reductase, mitochondrial isoform X4	4
>XP_011539852.1 enoyl-[acyl-carrier-protein] reductase, mitochondrial isoform X4 [Homo sapiens]	common SCSs = 4		>XP_011539852.1 enoyl-[acyl-carrier-protein] reductase, mitochondrial isoform X4	4
>XP_011539855.1 enoyl-[acyl-carrier-protein] reductase, mitochondrial isoform X4 [Homo sapiens]	common SCSs = 4		>XP_011539855.1 enoyl-[acyl-carrier-protein] reductase, mitochondrial isoform X4	4
>XP_011539856.1 enoyl-[acyl-carrier-protein] reductase, mitochondrial isoform X4 [Homo sapiens]	common SCSs = 4		>XP_011539856.1 enoyl-[acyl-carrier-protein] reductase, mitochondrial isoform X4	4
>XP_011541077.1 glutamate receptor 4 isoform X3 [Homo sapiens]	common SCSs = 4		>XP_011541077.1 glutamate receptor 4 isoform X3	4
>XP_011541078.1 glutamate receptor 4 isoform X6 [Homo sapiens]	common SCSs = 4		>XP_011541078.1 glutamate receptor 4 isoform X6	4
>XP_011541079.1 glutamate receptor 4 isoform X6 [Homo sapiens]	common SCSs = 4		>XP_011541079.1 glutamate receptor 4 isoform X6	4
>XP_011541135.1 histone-lysine N-methyltransferase 2A isoform X4 [Homo sapiens]	common SCSs = 4		>XP_011541135.1 histone-lysine N-methyltransferase 2A isoform X4	4
>XP_011541514.1 dmX-like protein 1 isoform X1 [Homo sapiens]	common SCSs = 4		>XP_011541514.1 dmX-like protein 1 isoform X1	4
>XP_011541515.1 dmX-like protein 1 isoform X1 [Homo sapiens]	common SCSs = 4		>XP_011541515.1 dmX-like protein 1 isoform X1	4
>XP_011541516.1 dmX-like protein 1 isoform X6 [Homo sapiens]	common SCSs = 4		>XP_011541516.1 dmX-like protein 1 isoform X6	4
>XP_011541517.1 dmX-like protein 1 isoform X6 [Homo sapiens]	common SCSs = 4		>XP_011541517.1 dmX-like protein 1 isoform X6	4
>XP_011544050.2 otoancorin isoform X1 [Homo sapiens]	common SCSs = 4		>XP_011544050.2 otoancorin isoform X1	4
>XP_011544071.1 serine/threonine-protein kinase SMG1 isoform X2 [Homo sapiens]	common SCSs = 4		>XP_011544071.1 serine/threonine-protein kinase SMG1 isoform X2	4
>XP_016855891.1 coiled-coil domain-containing protein 27 isoform X1 [Homo sapiens]	common SCSs = 4		>XP_016855891.1 coiled-coil domain-containing protein 27 isoform X1	4
>XP_016855892.1 coiled-coil domain-containing protein 27 isoform X2 [Homo sapiens]	common SCSs = 4		>XP_016855892.1 coiled-coil domain-containing protein 27 isoform X2	4
>XP_016855893.1 coiled-coil domain-containing protein 27 isoform X3 [Homo sapiens]	common SCSs = 4		>XP_016855893.1 coiled-coil domain-containing protein 27 isoform X3	4
>XP_016855894.1 coiled-coil domain-containing protein 27 isoform X5 [Homo sapiens]	common SCSs = 4		>XP_016855894.1 coiled-coil domain-containing protein 27 isoform X5	4
>XP_016855895.1 coiled-coil domain-containing protein 27 isoform X6 [Homo sapiens]	common SCSs = 4		>XP_016855895.1 coiled-coil domain-containing protein 27 isoform X6	4
>XP_016855939.1 coiled-coil domain-containing protein 17 isoform X2 [Homo sapiens]	common SCSs = 4		>XP_016855939.1 coiled-coil domain-containing protein 17 isoform X2	4
>XP_016855940.1 coiled-coil domain-containing protein 17 isoform X4 [Homo sapiens]	common SCSs = 4		>XP_016855940.1 coiled-coil domain-containing protein 17 isoform X4	4
>XP_016855941.1 coiled-coil domain-containing protein 17 isoform X5 [Homo sapiens]	common SCSs = 4		>XP_016855941.1 coiled-coil domain-containing protein 17 isoform X5	4
>XP_016855942.1 coiled-coil domain-containing protein 17 isoform X6 [Homo sapiens]	common SCSs = 4		>XP_016855942.1 coiled-coil domain-containing protein 17 isoform X6	4
>XP_016855943.1 coiled-coil domain-containing protein 17 isoform X7 [Homo sapiens]	common SCSs = 4		>XP_016855943.1 coiled-coil domain-containing protein 17 isoform X7	4
>XP_016855946.1 coiled-coil domain-containing protein 17 isoform X10 [Homo sapiens]	common SCSs = 4		>XP_016855946.1 coiled-coil domain-containing protein 17 isoform X10	4
>XP_016855947.1 coiled-coil domain-containing protein 17 isoform X10 [Homo sapiens]	common SCSs = 4		>XP_016855947.1 coiled-coil domain-containing protein 17 isoform X10	4
>XP_016856834.1 protein phosphatase 1 regulatory subunit 12B isoform X3 [Homo sapiens]	common SCSs = 4		>XP_016856834.1 protein phosphatase 1 regulatory subunit 12B isoform X3	4
>XP_016856837.1 protein phosphatase 1 regulatory subunit 12B isoform X6 [Homo sapiens]	common SCSs = 4		>XP_016856837.1 protein phosphatase 1 regulatory subunit 12B isoform X6	4
>XP_016856839.1 protein phosphatase 1 regulatory subunit 12B isoform X7 [Homo sapiens]	common SCSs = 4		>XP_016856839.1 protein phosphatase 1 regulatory subunit 12B isoform X7	4
>XP_016856900.1 enoyl-[acyl-carrier-protein] reductase, mitochondrial isoform X4 [Homo sapiens]	common SCSs = 4		>XP_016856900.1 enoyl-[acyl-carrier-protein] reductase, mitochondrial isoform X4	4
>XP_016856901.1 enoyl-[acyl-carrier-protein] reductase, mitochondrial isoform X4 [Homo sapiens]	common SCSs = 4		>XP_016856901.1 enoyl-[acyl-carrier-protein] reductase, mitochondrial isoform X4	4
>XP_016857880.1 pecanex-like protein 2 isoform X1 [Homo sapiens]	common SCSs = 4		>XP_016857880.1 pecanex-like protein 2 isoform X1	4
>XP_016859010.1 dynein heavy chain 6, axonemal isoform X4 [Homo sapiens]	common SCSs = 4		>XP_016859010.1 dynein heavy chain 6, axonemal isoform X4	4
>XP_016859011.1 dynein heavy chain 6, axonemal isoform X7 [Homo sapiens]	common SCSs = 4		>XP_016859011.1 dynein heavy chain 6, axonemal isoform X7	4
>XP_016859012.1 dynein heavy chain 6, axonemal isoform X7 [Homo sapiens]	common SCSs = 4		>XP_016859012.1 dynein heavy chain 6, axonemal isoform X7	4
>XP_016859066.1 receptor tyrosine-protein kinase erbB-4 isoform X1 [Homo sapiens]	common SCSs = 4		>XP_016859066.1 receptor tyrosine-protein kinase erbB-4 isoform X1	4
>XP_016859067.1 receptor tyrosine-protein kinase erbB-4 isoform X2 [Homo sapiens]	common SCSs = 4		>XP_016859067.1 receptor tyrosine-protein kinase erbB-4 isoform X2	4
>XP_016859069.1 receptor tyrosine-protein kinase erbB-4 isoform X4 [Homo sapiens]	common SCSs = 4		>XP_016859069.1 receptor tyrosine-protein kinase erbB-4 isoform X4	4
>XP_016859666.1 nebulin isoform X6 [Homo sapiens]	common SCSs = 4		>XP_016859666.1 nebulin isoform X6	4
>XP_016859667.1 nebulin isoform X8 [Homo sapiens]	common SCSs = 4		>XP_016859667.1 nebulin isoform X8	4
>XP_016859668.1 nebulin isoform X16 [Homo sapiens]	common SCSs = 4		>XP_016859668.1 nebulin isoform X16	4
>XP_016859669.1 nebulin isoform X19 [Homo sapiens]	common SCSs = 4		>XP_016859669.1 nebulin isoform X19	4
>XP_016859670.1 nebulin isoform X21 [Homo sapiens]	common SCSs = 4		>XP_016859670.1 nebulin isoform X21	4
>XP_016859671.1 nebulin isoform X23 [Homo sapiens]	common SCSs = 4		>XP_016859671.1 nebulin isoform X23	4
>XP_016859672.1 nebulin isoform X28 [Homo sapiens]	common SCSs = 4		>XP_016859672.1 nebulin isoform X28	4
>XP_016859673.1 nebulin isoform X30 [Homo sapiens]	common SCSs = 4		>XP_016859673.1 nebulin isoform X30	4
>XP_016859674.1 nebulin isoform X32 [Homo sapiens]	common SCSs = 4		>XP_016859674.1 nebulin isoform X32	4
>XP_016859930.1 dedicator of cytokinesis protein 10 isoform X1 [Homo sapiens]	common SCSs = 4		>XP_016859930.1 dedicator of cytokinesis protein 10 isoform X1	4
>XP_016859931.1 dedicator of cytokinesis protein 10 isoform X2 [Homo sapiens]	common SCSs = 4		>XP_016859931.1 dedicator of cytokinesis protein 10 isoform X2	4
>XP_016859932.1 dedicator of cytokinesis protein 10 isoform X3 [Homo sapiens]	common SCSs = 4		>XP_016859932.1 dedicator of cytokinesis protein 10 isoform X3	4
>XP_016859933.1 dedicator of cytokinesis protein 10 isoform X4 [Homo sapiens]	common SCSs = 4		>XP_016859933.1 dedicator of cytokinesis protein 10 isoform X4	4
>XP_016859934.1 dedicator of cytokinesis protein 10 isoform X5 [Homo sapiens]	common SCSs = 4		>XP_016859934.1 dedicator of cytokinesis protein 10 isoform X5	4
>XP_016859935.1 dedicator of cytokinesis protein 10 isoform X8 [Homo sapiens]	common SCSs = 4		>XP_016859935.1 dedicator of cytokinesis protein 10 isoform X8	4
>XP_016859936.1 dedicator of cytokinesis protein 10 isoform X9 [Homo sapiens]	common SCSs = 4		>XP_016859936.1 dedicator of cytokinesis protein 10 isoform X9	4
>XP_016859965.1 girdin isoform X2 [Homo sapiens]	common SCSs = 4		>XP_016859965.1 girdin isoform X2	4
>XP_016859966.1 girdin isoform X3 [Homo sapiens]	common SCSs = 4		>XP_016859966.1 girdin isoform X3	4
>XP_016859967.1 girdin isoform X4 [Homo sapiens]	common SCSs = 4		>XP_016859967.1 girdin isoform X4	4
>XP_016859968.1 girdin isoform X5 [Homo sapiens]	common SCSs = 4		>XP_016859968.1 girdin isoform X5	4
>XP_016859969.1 girdin isoform X6 [Homo sapiens]	common SCSs = 4		>XP_016859969.1 girdin isoform X6	4
>XP_016860049.1 baculoviral IAP repeat-containing protein 6 isoform X17 [Homo sapiens]	common SCSs = 4		>XP_016860049.1 baculoviral IAP repeat-containing protein 6 isoform X17	4
>XP_016860199.1 anaphase-promoting complex subunit 1 isoform X2 [Homo sapiens]	common SCSs = 4		>XP_016860199.1 anaphase-promoting complex subunit 1 isoform X2	4
>XP_016860200.1 anaphase-promoting complex subunit 1 isoform X3 [Homo sapiens]	common SCSs = 4		>XP_016860200.1 anaphase-promoting complex subunit 1 isoform X3	4
>XP_016860204.1 anaphase-promoting complex subunit 1 isoform X8 [Homo sapiens]	common SCSs = 4		>XP_016860204.1 anaphase-promoting complex subunit 1 isoform X8	4
>XP_016860642.1 protein TANC1 isoform X15 [Homo sapiens]	common SCSs = 4		>XP_016860642.1 protein TANC1 isoform X15	4
>XP_016860645.1 protein TANC1 isoform X20 [Homo sapiens]	common SCSs = 4		>XP_016860645.1 protein TANC1 isoform X20	4
>XP_016861349.1 dynein heavy chain 12, axonemal isoform X5 [Homo sapiens]	common SCSs = 4		>XP_016861349.1 dynein heavy chain 12, axonemal isoform X5	4
>XP_016861350.1 dynein heavy chain 12, axonemal isoform X6 [Homo sapiens]	common SCSs = 4		>XP_016861350.1 dynein heavy chain 12, axonemal isoform X6	4
>XP_016861573.1 palmitoyltransferase ZDHHC23 isoform X2 [Homo sapiens]	common SCSs = 4		>XP_016861573.1 palmitoyltransferase ZDHHC23 isoform X2	4
>XP_016861575.1 palmitoyltransferase ZDHHC23 isoform X6 [Homo sapiens]	common SCSs = 4		>XP_016861575.1 palmitoyltransferase ZDHHC23 isoform X6	4
>XP_016861576.1 palmitoyltransferase ZDHHC23 isoform X7 [Homo sapiens]	common SCSs = 4		>XP_016861576.1 palmitoyltransferase ZDHHC23 isoform X7	4
>XP_016861880.1 microtubule-associated protein 4 isoform X4 [Homo sapiens]	common SCSs = 4		>XP_016861880.1 microtubule-associated protein 4 isoform X4	4
>XP_016861881.1 microtubule-associated protein 4 isoform X10 [Homo sapiens]	common SCSs = 4		>XP_016861881.1 microtubule-associated protein 4 isoform X10	4
>XP_016862256.1 histone-lysine N-methyltransferase SETD5 isoform X1 [Homo sapiens]	common SCSs = 4		>XP_016862256.1 histone-lysine N-methyltransferase SETD5 isoform X1	4
>XP_016862259.1 histone-lysine N-methyltransferase SETD5 isoform X4 [Homo sapiens]	common SCSs = 4		>XP_016862259.1 histone-lysine N-methyltransferase SETD5 isoform X4	4
>XP_016862261.1 histone-lysine N-methyltransferase SETD5 isoform X8 [Homo sapiens]	common SCSs = 4		>XP_016862261.1 histone-lysine N-methyltransferase SETD5 isoform X8	4
>XP_016862262.1 histone-lysine N-methyltransferase SETD5 isoform X9 [Homo sapiens]	common SCSs = 4		>XP_016862262.1 histone-lysine N-methyltransferase SETD5 isoform X9	4
>XP_016862264.1 histone-lysine N-methyltransferase SETD5 isoform X13 [Homo sapiens]	common SCSs = 4		>XP_016862264.1 histone-lysine N-methyltransferase SETD5 isoform X13	4
>XP_016862265.1 histone-lysine N-methyltransferase SETD5 isoform X16 [Homo sapiens]	common SCSs = 4		>XP_016862265.1 histone-lysine N-methyltransferase SETD5 isoform X16	4
>XP_016862266.1 histone-lysine N-methyltransferase SETD5 isoform X16 [Homo sapiens]	common SCSs = 4		>XP_016862266.1 histone-lysine N-methyltransferase SETD5 isoform X16	4
>XP_016862267.1 histone-lysine N-methyltransferase SETD5 isoform X16 [Homo sapiens]	common SCSs = 4		>XP_016862267.1 histone-lysine N-methyltransferase SETD5 isoform X16	4
>XP_016862268.1 histone-lysine N-methyltransferase SETD5 isoform X17 [Homo sapiens]	common SCSs = 4		>XP_016862268.1 histone-lysine N-methyltransferase SETD5 isoform X17	4
>XP_016862269.1 histone-lysine N-methyltransferase SETD5 isoform X17 [Homo sapiens]	common SCSs = 4		>XP_016862269.1 histone-lysine N-methyltransferase SETD5 isoform X17	4
>XP_016862272.1 histone-lysine N-methyltransferase SETD5 isoform X19 [Homo sapiens]	common SCSs = 4		>XP_016862272.1 histone-lysine N-methyltransferase SETD5 isoform X19	4
>XP_016863827.1 la-related protein 1B isoform X1 [Homo sapiens]	common SCSs = 4		>XP_016863827.1 la-related protein 1B isoform X1	4
>XP_016863828.1 la-related protein 1B isoform X5 [Homo sapiens]	common SCSs = 4		>XP_016863828.1 la-related protein 1B isoform X5	4
>XP_016864632.1 dmX-like protein 1 isoform X3 [Homo sapiens]	common SCSs = 4		>XP_016864632.1 dmX-like protein 1 isoform X3	4
>XP_016864633.1 dmX-like protein 1 isoform X3 [Homo sapiens]	common SCSs = 4		>XP_016864633.1 dmX-like protein 1 isoform X3	4
>XP_016864634.1 dmX-like protein 1 isoform X3 [Homo sapiens]	common SCSs = 4		>XP_016864634.1 dmX-like protein 1 isoform X3	4
>XP_016864635.1 dmX-like protein 1 isoform X4 [Homo sapiens]	common SCSs = 4		>XP_016864635.1 dmX-like protein 1 isoform X4	4
>XP_016864636.1 dmX-like protein 1 isoform X5 [Homo sapiens]	common SCSs = 4		>XP_016864636.1 dmX-like protein 1 isoform X5	4
>XP_016864637.1 dmX-like protein 1 isoform X6 [Homo sapiens]	common SCSs = 4		>XP_016864637.1 dmX-like protein 1 isoform X6	4
>XP_016864734.1 PDZ domain-containing protein 2 isoform X6 [Homo sapiens]	common SCSs = 4		>XP_016864734.1 PDZ domain-containing protein 2 isoform X6	4
>XP_016864735.1 PDZ domain-containing protein 2 isoform X7 [Homo sapiens]	common SCSs = 4		>XP_016864735.1 PDZ domain-containing protein 2 isoform X7	4
>XP_016864774.1 little elongation complex subunit 1 isoform X2 [Homo sapiens]	common SCSs = 4		>XP_016864774.1 little elongation complex subunit 1 isoform X2	4
>XP_016864881.1 glutamate receptor 1 isoform X1 [Homo sapiens]	common SCSs = 4		>XP_016864881.1 glutamate receptor 1 isoform X1	4
>XP_016865249.1 ciliogenesis and planar polarity effector 1 isoform X9 [Homo sapiens]	common SCSs = 4		>XP_016865249.1 ciliogenesis and planar polarity effector 1 isoform X9	4
>XP_016865250.1 ciliogenesis and planar polarity effector 1 isoform X9 [Homo sapiens]	common SCSs = 4		>XP_016865250.1 ciliogenesis and planar polarity effector 1 isoform X9	4
>XP_016865252.1 ciliogenesis and planar polarity effector 1 isoform X13 [Homo sapiens]	common SCSs = 4		>XP_016865252.1 ciliogenesis and planar polarity effector 1 isoform X13	4
>XP_016865254.1 ciliogenesis and planar polarity effector 1 isoform X14 [Homo sapiens]	common SCSs = 4		>XP_016865254.1 ciliogenesis and planar polarity effector 1 isoform X14	4
>XP_016865256.1 sodium-dependent proline transporter isoform X1 [Homo sapiens]	common SCSs = 4		>XP_016865256.1 sodium-dependent proline transporter isoform X1	4
>XP_016865257.1 sodium-dependent proline transporter isoform X2 [Homo sapiens]	common SCSs = 4		>XP_016865257.1 sodium-dependent proline transporter isoform X2	4
>XP_016865258.1 sodium-dependent proline transporter isoform X2 [Homo sapiens]	common SCSs = 4		>XP_016865258.1 sodium-dependent proline transporter isoform X2	4
>XP_016865259.1 sodium-dependent proline transporter isoform X3 [Homo sapiens]	common SCSs = 4		>XP_016865259.1 sodium-dependent proline transporter isoform X3	4
>XP_016865268.1 slit homolog 3 protein isoform X1 [Homo sapiens]	common SCSs = 4		>XP_016865268.1 slit homolog 3 protein isoform X1	4
>XP_016865972.1 centrosomal protein of 162 kDa isoform X1 [Homo sapiens]	common SCSs = 4		>XP_016865972.1 centrosomal protein of 162 kDa isoform X1	4
>XP_016865973.1 centrosomal protein of 162 kDa isoform X2 [Homo sapiens]	common SCSs = 4		>XP_016865973.1 centrosomal protein of 162 kDa isoform X2	4
>XP_016866340.1 laminin subunit alpha-2 isoform X4 [Homo sapiens]	common SCSs = 4		>XP_016866340.1 laminin subunit alpha-2 isoform X4	4
>XP_016866342.1 laminin subunit alpha-2 isoform X6 [Homo sapiens]	common SCSs = 4		>XP_016866342.1 laminin subunit alpha-2 isoform X6	4
>XP_016866343.1 laminin subunit alpha-4 isoform X2 [Homo sapiens]	common SCSs = 4		>XP_016866343.1 laminin subunit alpha-4 isoform X2	4
>XP_016866437.1 fibrocystin isoform X7 [Homo sapiens]	common SCSs = 4		>XP_016866437.1 fibrocystin isoform X7	4
>XP_016866440.1 fibrocystin isoform X14 [Homo sapiens]	common SCSs = 4		>XP_016866440.1 fibrocystin isoform X14	4
>XP_016866441.1 fibrocystin isoform X15 [Homo sapiens]	common SCSs = 4		>XP_016866441.1 fibrocystin isoform X15	4
>XP_016866478.1 PH-interacting protein isoform X3 [Homo sapiens]	common SCSs = 4		>XP_016866478.1 PH-interacting protein isoform X3	4
>XP_016866479.1 PH-interacting protein isoform X3 [Homo sapiens]	common SCSs = 4		>XP_016866479.1 PH-interacting protein isoform X3	4
>XP_016866575.1 NHS-like protein 1 isoform X1 [Homo sapiens]	common SCSs = 4		>XP_016866575.1 NHS-like protein 1 isoform X1	4
>XP_016866576.1 NHS-like protein 1 isoform X3 [Homo sapiens]	common SCSs = 4		>XP_016866576.1 NHS-like protein 1 isoform X3	4
>XP_016866577.1 NHS-like protein 1 isoform X7 [Homo sapiens]	common SCSs = 4		>XP_016866577.1 NHS-like protein 1 isoform X7	4
>XP_016866578.1 NHS-like protein 1 isoform X12 [Homo sapiens]	common SCSs = 4		>XP_016866578.1 NHS-like protein 1 isoform X12	4
>XP_016866644.1 DNA polymerase zeta catalytic subunit isoform X7 [Homo sapiens]	common SCSs = 4		>XP_016866644.1 DNA polymerase zeta catalytic subunit isoform X7	4
>XP_016866694.1 dystonin isoform X1 [Homo sapiens]	common SCSs = 4		>XP_016866694.1 dystonin isoform X1	4
>XP_016866695.1 dystonin isoform X2 [Homo sapiens]	common SCSs = 4		>XP_016866695.1 dystonin isoform X2	4
>XP_016866696.1 dystonin isoform X4 [Homo sapiens]	common SCSs = 4		>XP_016866696.1 dystonin isoform X4	4
>XP_016866698.1 dystonin isoform X6 [Homo sapiens]	common SCSs = 4		>XP_016866698.1 dystonin isoform X6	4
>XP_016866699.1 dystonin isoform X8 [Homo sapiens]	common SCSs = 4		>XP_016866699.1 dystonin isoform X8	4
>XP_016866700.1 dystonin isoform X10 [Homo sapiens]	common SCSs = 4		>XP_016866700.1 dystonin isoform X10	4
>XP_016866701.1 dystonin isoform X11 [Homo sapiens]	common SCSs = 4		>XP_016866701.1 dystonin isoform X11	4
>XP_016866702.1 dystonin isoform X13 [Homo sapiens]	common SCSs = 4		>XP_016866702.1 dystonin isoform X13	4
>XP_016866703.1 dystonin isoform X14 [Homo sapiens]	common SCSs = 4		>XP_016866703.1 dystonin isoform X14	4
>XP_016866704.1 dystonin isoform X15 [Homo sapiens]	common SCSs = 4		>XP_016866704.1 dystonin isoform X15	4
>XP_016866705.1 dystonin isoform X17 [Homo sapiens]	common SCSs = 4		>XP_016866705.1 dystonin isoform X17	4
>XP_016867256.1 ATP-binding cassette sub-family A member 13 isoform X10 [Homo sapiens]	common SCSs = 4		>XP_016867256.1 ATP-binding cassette sub-family A member 13 isoform X10	4
>XP_016867257.1 ATP-binding cassette sub-family A member 13 isoform X11 [Homo sapiens]	common SCSs = 4		>XP_016867257.1 ATP-binding cassette sub-family A member 13 isoform X11	4
>XP_016867843.1 anillin isoform X2 [Homo sapiens]	common SCSs = 4		>XP_016867843.1 anillin isoform X2	4
>XP_016867844.1 anillin isoform X3 [Homo sapiens]	common SCSs = 4		>XP_016867844.1 anillin isoform X3	4
>XP_016867845.1 anillin isoform X5 [Homo sapiens]	common SCSs = 4		>XP_016867845.1 anillin isoform X5	4
>XP_016868261.1 maltase-glucoamylase, intestinal isoform X1 [Homo sapiens]	common SCSs = 4		>XP_016868261.1 maltase-glucoamylase, intestinal isoform X1	4
>XP_016869458.1 fibrocystin-L isoform X1 [Homo sapiens]	common SCSs = 4		>XP_016869458.1 fibrocystin-L isoform X1	4
>XP_016869459.1 fibrocystin-L isoform X3 [Homo sapiens]	common SCSs = 4		>XP_016869459.1 fibrocystin-L isoform X3	4
>XP_016869460.1 fibrocystin-L isoform X4 [Homo sapiens]	common SCSs = 4		>XP_016869460.1 fibrocystin-L isoform X4	4
>XP_016869461.1 fibrocystin-L isoform X5 [Homo sapiens]	common SCSs = 4		>XP_016869461.1 fibrocystin-L isoform X5	4
>XP_016869592.1 RB1-inducible coiled-coil protein 1 isoform X1 [Homo sapiens]	common SCSs = 4		>XP_016869592.1 RB1-inducible coiled-coil protein 1 isoform X1	4
>XP_016869593.1 RB1-inducible coiled-coil protein 1 isoform X1 [Homo sapiens]	common SCSs = 4		>XP_016869593.1 RB1-inducible coiled-coil protein 1 isoform X1	4
>XP_016869594.1 RB1-inducible coiled-coil protein 1 isoform X2 [Homo sapiens]	common SCSs = 4		>XP_016869594.1 RB1-inducible coiled-coil protein 1 isoform X2	4
>XP_016869595.1 RB1-inducible coiled-coil protein 1 isoform X4 [Homo sapiens]	common SCSs = 4		>XP_016869595.1 RB1-inducible coiled-coil protein 1 isoform X4	4
>XP_016869596.1 RB1-inducible coiled-coil protein 1 isoform X5 [Homo sapiens]	common SCSs = 4		>XP_016869596.1 RB1-inducible coiled-coil protein 1 isoform X5	4
>XP_016869597.1 RB1-inducible coiled-coil protein 1 isoform X6 [Homo sapiens]	common SCSs = 4		>XP_016869597.1 RB1-inducible coiled-coil protein 1 isoform X6	4
>XP_016869598.1 RB1-inducible coiled-coil protein 1 isoform X9 [Homo sapiens]	common SCSs = 4		>XP_016869598.1 RB1-inducible coiled-coil protein 1 isoform X9	4
>XP_016870747.1 multiple PDZ domain protein isoform X8 [Homo sapiens]	common SCSs = 4		>XP_016870747.1 multiple PDZ domain protein isoform X8	4
>XP_016870748.1 multiple PDZ domain protein isoform X9 [Homo sapiens]	common SCSs = 4		>XP_016870748.1 multiple PDZ domain protein isoform X9	4
>XP_016870900.1 proline rich transmembrane protein 1B isoform X1 [Homo sapiens]	common SCSs = 4		>XP_016870900.1 proline rich transmembrane protein 1B isoform X1	4
>XP_016870993.1 sorbin and SH3 domain-containing protein 1 isoform X10 [Homo sapiens]	common SCSs = 4		>XP_016870993.1 sorbin and SH3 domain-containing protein 1 isoform X10	4
>XP_016870995.1 sorbin and SH3 domain-containing protein 1 isoform X12 [Homo sapiens]	common SCSs = 4		>XP_016870995.1 sorbin and SH3 domain-containing protein 1 isoform X12	4
>XP_016870997.1 sorbin and SH3 domain-containing protein 1 isoform X15 [Homo sapiens]	common SCSs = 4		>XP_016870997.1 sorbin and SH3 domain-containing protein 1 isoform X15	4
>XP_016870998.1 sorbin and SH3 domain-containing protein 1 isoform X16 [Homo sapiens]	common SCSs = 4		>XP_016870998.1 sorbin and SH3 domain-containing protein 1 isoform X16	4
>XP_016871000.1 sorbin and SH3 domain-containing protein 1 isoform X18 [Homo sapiens]	common SCSs = 4		>XP_016871000.1 sorbin and SH3 domain-containing protein 1 isoform X18	4
>XP_016871001.1 sorbin and SH3 domain-containing protein 1 isoform X19 [Homo sapiens]	common SCSs = 4		>XP_016871001.1 sorbin and SH3 domain-containing protein 1 isoform X19	4
>XP_016871002.1 sorbin and SH3 domain-containing protein 1 isoform X20 [Homo sapiens]	common SCSs = 4		>XP_016871002.1 sorbin and SH3 domain-containing protein 1 isoform X20	4
>XP_016871103.1 VPS10 domain-containing receptor SorCS1 isoform X1 [Homo sapiens]	common SCSs = 4		>XP_016871103.1 VPS10 domain-containing receptor SorCS1 isoform X1	4
>XP_016871104.1 VPS10 domain-containing receptor SorCS1 isoform X3 [Homo sapiens]	common SCSs = 4		>XP_016871104.1 VPS10 domain-containing receptor SorCS1 isoform X3	4
>XP_016871503.1 WASH complex subunit 2C isoform X3 [Homo sapiens]	common SCSs = 4		>XP_016871503.1 WASH complex subunit 2C isoform X3	4
>XP_016871506.1 WASH complex subunit 2C isoform X7 [Homo sapiens]	common SCSs = 4		>XP_016871506.1 WASH complex subunit 2C isoform X7	4
>XP_016871716.1 WASH complex subunit 2A isoform X3 [Homo sapiens]	common SCSs = 4		>XP_016871716.1 WASH complex subunit 2A isoform X3	4
>XP_016871719.1 WASH complex subunit 2A isoform X7 [Homo sapiens]	common SCSs = 4		>XP_016871719.1 WASH complex subunit 2A isoform X7	4
>XP_016871799.1 1-phosphatidylinositol 4,5-bisphosphate phosphodiesterase epsilon-1 isoform X1 [Homo sapiens]	common SCSs = 4		>XP_016871799.1 1-phosphatidylinositol 4,5-bisphosphate phosphodiesterase epsilon-1 isoform X1	4
>XP_016871800.1 1-phosphatidylinositol 4,5-bisphosphate phosphodiesterase epsilon-1 isoform X1 [Homo sapiens]	common SCSs = 4		>XP_016871800.1 1-phosphatidylinositol 4,5-bisphosphate phosphodiesterase epsilon-1 isoform X1	4
>XP_016872402.1 disks large homolog 5 isoform X4 [Homo sapiens]	common SCSs = 4		>XP_016872402.1 disks large homolog 5 isoform X4	4
>XP_016872403.1 disks large homolog 5 isoform X5 [Homo sapiens]	common SCSs = 4		>XP_016872403.1 disks large homolog 5 isoform X5	4
>XP_016872667.1 protocadherin Fat 3 isoform X1 [Homo sapiens]	common SCSs = 4		>XP_016872667.1 protocadherin Fat 3 isoform X1	4
>XP_016872668.1 protocadherin Fat 3 isoform X1 [Homo sapiens]	common SCSs = 4		>XP_016872668.1 protocadherin Fat 3 isoform X1	4
>XP_016872669.1 protocadherin Fat 3 isoform X2 [Homo sapiens]	common SCSs = 4		>XP_016872669.1 protocadherin Fat 3 isoform X2	4
>XP_016872671.1 protocadherin Fat 3 isoform X4 [Homo sapiens]	common SCSs = 4		>XP_016872671.1 protocadherin Fat 3 isoform X4	4
>XP_016872673.1 protocadherin Fat 3 isoform X6 [Homo sapiens]	common SCSs = 4		>XP_016872673.1 protocadherin Fat 3 isoform X6	4
>XP_016872674.1 protocadherin Fat 3 isoform X7 [Homo sapiens]	common SCSs = 4		>XP_016872674.1 protocadherin Fat 3 isoform X7	4
>XP_016872675.1 protocadherin Fat 3 isoform X8 [Homo sapiens]	common SCSs = 4		>XP_016872675.1 protocadherin Fat 3 isoform X8	4
>XP_016872676.1 protocadherin Fat 3 isoform X8 [Homo sapiens]	common SCSs = 4		>XP_016872676.1 protocadherin Fat 3 isoform X8	4
>XP_016872730.1 pleckstrin homology domain-containing family A member 7 isoform X13 [Homo sapiens]	common SCSs = 4		>XP_016872730.1 pleckstrin homology domain-containing family A member 7 isoform X13	4
>XP_016872731.1 pleckstrin homology domain-containing family A member 7 isoform X14 [Homo sapiens]	common SCSs = 4		>XP_016872731.1 pleckstrin homology domain-containing family A member 7 isoform X14	4
>XP_016873026.1 neuronal PAS domain-containing protein 4 isoform X1 [Homo sapiens]	common SCSs = 4		>XP_016873026.1 neuronal PAS domain-containing protein 4 isoform X1	4
>XP_016873027.1 neuronal PAS domain-containing protein 4 isoform X2 [Homo sapiens]	common SCSs = 4		>XP_016873027.1 neuronal PAS domain-containing protein 4 isoform X2	4
>XP_016873098.1 glutamate receptor 4 isoform X4 [Homo sapiens]	common SCSs = 4		>XP_016873098.1 glutamate receptor 4 isoform X4	4
>XP_016873099.1 glutamate receptor 4 isoform X5 [Homo sapiens]	common SCSs = 4		>XP_016873099.1 glutamate receptor 4 isoform X5	4
>XP_016873100.1 glutamate receptor 4 isoform X6 [Homo sapiens]	common SCSs = 4		>XP_016873100.1 glutamate receptor 4 isoform X6	4
>XP_016874009.1 neuron navigator 2 isoform X9 [Homo sapiens]	common SCSs = 4		>XP_016874009.1 neuron navigator 2 isoform X9	4
>XP_016874010.1 neuron navigator 2 isoform X12 [Homo sapiens]	common SCSs = 4		>XP_016874010.1 neuron navigator 2 isoform X12	4
>XP_016874011.1 neuron navigator 2 isoform X13 [Homo sapiens]	common SCSs = 4		>XP_016874011.1 neuron navigator 2 isoform X13	4
>XP_016874012.1 neuron navigator 2 isoform X16 [Homo sapiens]	common SCSs = 4		>XP_016874012.1 neuron navigator 2 isoform X16	4
>XP_016874013.1 neuron navigator 2 isoform X16 [Homo sapiens]	common SCSs = 4		>XP_016874013.1 neuron navigator 2 isoform X16	4
>XP_016874014.1 neuron navigator 2 isoform X17 [Homo sapiens]	common SCSs = 4		>XP_016874014.1 neuron navigator 2 isoform X17	4
>XP_016874532.1 protein MON2 homolog isoform X3 [Homo sapiens]	common SCSs = 4		>XP_016874532.1 protein MON2 homolog isoform X3	4
>XP_016874533.1 protein MON2 homolog isoform X3 [Homo sapiens]	common SCSs = 4		>XP_016874533.1 protein MON2 homolog isoform X3	4
>XP_016874534.1 protein MON2 homolog isoform X3 [Homo sapiens]	common SCSs = 4		>XP_016874534.1 protein MON2 homolog isoform X3	4
>XP_016874762.1 phosphatidylinositol phosphatase PTPRQ isoform X1 [Homo sapiens]	common SCSs = 4		>XP_016874762.1 phosphatidylinositol phosphatase PTPRQ isoform X1	4
>XP_016874763.1 phosphatidylinositol phosphatase PTPRQ isoform X2 [Homo sapiens]	common SCSs = 4		>XP_016874763.1 phosphatidylinositol phosphatase PTPRQ isoform X2	4
>XP_016875653.1 neuron navigator 3 isoform X1 [Homo sapiens]	common SCSs = 4		>XP_016875653.1 neuron navigator 3 isoform X1	4
>XP_016875654.1 neuron navigator 3 isoform X2 [Homo sapiens]	common SCSs = 4		>XP_016875654.1 neuron navigator 3 isoform X2	4
>XP_016875655.1 neuron navigator 3 isoform X6 [Homo sapiens]	common SCSs = 4		>XP_016875655.1 neuron navigator 3 isoform X6	4
>XP_016875656.1 neuron navigator 3 isoform X7 [Homo sapiens]	common SCSs = 4		>XP_016875656.1 neuron navigator 3 isoform X7	4
>XP_016875657.1 neuron navigator 3 isoform X8 [Homo sapiens]	common SCSs = 4		>XP_016875657.1 neuron navigator 3 isoform X8	4
>XP_016875658.1 neuron navigator 3 isoform X9 [Homo sapiens]	common SCSs = 4		>XP_016875658.1 neuron navigator 3 isoform X9	4
>XP_016875659.1 neuron navigator 3 isoform X11 [Homo sapiens]	common SCSs = 4		>XP_016875659.1 neuron navigator 3 isoform X11	4
>XP_016875660.1 neuron navigator 3 isoform X12 [Homo sapiens]	common SCSs = 4		>XP_016875660.1 neuron navigator 3 isoform X12	4
>XP_016875661.1 neuron navigator 3 isoform X13 [Homo sapiens]	common SCSs = 4		>XP_016875661.1 neuron navigator 3 isoform X13	4
>XP_016875662.1 neuron navigator 3 isoform X14 [Homo sapiens]	common SCSs = 4		>XP_016875662.1 neuron navigator 3 isoform X14	4
>XP_016875663.1 neuron navigator 3 isoform X15 [Homo sapiens]	common SCSs = 4		>XP_016875663.1 neuron navigator 3 isoform X15	4
>XP_016875664.1 neuron navigator 3 isoform X16 [Homo sapiens]	common SCSs = 4		>XP_016875664.1 neuron navigator 3 isoform X16	4
>XP_016875945.1 E3 ubiquitin-protein ligase MYCBP2 isoform X11 [Homo sapiens]	common SCSs = 4		>XP_016875945.1 E3 ubiquitin-protein ligase MYCBP2 isoform X11	4
>XP_016875946.1 E3 ubiquitin-protein ligase MYCBP2 isoform X12 [Homo sapiens]	common SCSs = 4		>XP_016875946.1 E3 ubiquitin-protein ligase MYCBP2 isoform X12	4
>XP_016875947.1 E3 ubiquitin-protein ligase MYCBP2 isoform X13 [Homo sapiens]	common SCSs = 4		>XP_016875947.1 E3 ubiquitin-protein ligase MYCBP2 isoform X13	4
>XP_016875948.1 E3 ubiquitin-protein ligase MYCBP2 isoform X18 [Homo sapiens]	common SCSs = 4		>XP_016875948.1 E3 ubiquitin-protein ligase MYCBP2 isoform X18	4
>XP_016875950.1 E3 ubiquitin-protein ligase MYCBP2 isoform X20 [Homo sapiens]	common SCSs = 4		>XP_016875950.1 E3 ubiquitin-protein ligase MYCBP2 isoform X20	4
>XP_016875951.1 E3 ubiquitin-protein ligase MYCBP2 isoform X21 [Homo sapiens]	common SCSs = 4		>XP_016875951.1 E3 ubiquitin-protein ligase MYCBP2 isoform X21	4
>XP_016875952.1 E3 ubiquitin-protein ligase MYCBP2 isoform X22 [Homo sapiens]	common SCSs = 4		>XP_016875952.1 E3 ubiquitin-protein ligase MYCBP2 isoform X22	4
>XP_016875953.1 E3 ubiquitin-protein ligase MYCBP2 isoform X23 [Homo sapiens]	common SCSs = 4		>XP_016875953.1 E3 ubiquitin-protein ligase MYCBP2 isoform X23	4
>XP_016875954.1 E3 ubiquitin-protein ligase MYCBP2 isoform X24 [Homo sapiens]	common SCSs = 4		>XP_016875954.1 E3 ubiquitin-protein ligase MYCBP2 isoform X24	4
>XP_016875955.1 E3 ubiquitin-protein ligase MYCBP2 isoform X25 [Homo sapiens]	common SCSs = 4		>XP_016875955.1 E3 ubiquitin-protein ligase MYCBP2 isoform X25	4
>XP_016875956.1 E3 ubiquitin-protein ligase MYCBP2 isoform X26 [Homo sapiens]	common SCSs = 4		>XP_016875956.1 E3 ubiquitin-protein ligase MYCBP2 isoform X26	4
>XP_016876033.1 neurobeachin isoform X4 [Homo sapiens]	common SCSs = 4		>XP_016876033.1 neurobeachin isoform X4	4
>XP_016876034.1 neurobeachin isoform X7 [Homo sapiens]	common SCSs = 4		>XP_016876034.1 neurobeachin isoform X7	4
>XP_016876035.1 neurobeachin isoform X8 [Homo sapiens]	common SCSs = 4		>XP_016876035.1 neurobeachin isoform X8	4
>XP_016876637.1 E3 ubiquitin-protein ligase HECTD1 isoform X3 [Homo sapiens]	common SCSs = 4		>XP_016876637.1 E3 ubiquitin-protein ligase HECTD1 isoform X3	4
>XP_016876638.1 E3 ubiquitin-protein ligase HECTD1 isoform X4 [Homo sapiens]	common SCSs = 4		>XP_016876638.1 E3 ubiquitin-protein ligase HECTD1 isoform X4	4
>XP_016876640.1 E3 ubiquitin-protein ligase HECTD1 isoform X6 [Homo sapiens]	common SCSs = 4		>XP_016876640.1 E3 ubiquitin-protein ligase HECTD1 isoform X6	4
>XP_016876641.1 E3 ubiquitin-protein ligase HECTD1 isoform X7 [Homo sapiens]	common SCSs = 4		>XP_016876641.1 E3 ubiquitin-protein ligase HECTD1 isoform X7	4
>XP_016876642.1 E3 ubiquitin-protein ligase HECTD1 isoform X7 [Homo sapiens]	common SCSs = 4		>XP_016876642.1 E3 ubiquitin-protein ligase HECTD1 isoform X7	4
>XP_016876652.1 signal-induced proliferation-associated 1-like protein 1 isoform X1 [Homo sapiens]	common SCSs = 4		>XP_016876652.1 signal-induced proliferation-associated 1-like protein 1 isoform X1	4
>XP_016876666.1 signal-induced proliferation-associated 1-like protein 1 isoform X1 [Homo sapiens]	common SCSs = 4		>XP_016876666.1 signal-induced proliferation-associated 1-like protein 1 isoform X1	4
>XP_016876667.1 signal-induced proliferation-associated 1-like protein 1 isoform X1 [Homo sapiens]	common SCSs = 4		>XP_016876667.1 signal-induced proliferation-associated 1-like protein 1 isoform X1	4
>XP_016876668.1 signal-induced proliferation-associated 1-like protein 1 isoform X1 [Homo sapiens]	common SCSs = 4		>XP_016876668.1 signal-induced proliferation-associated 1-like protein 1 isoform X1	4
>XP_016876669.1 signal-induced proliferation-associated 1-like protein 1 isoform X1 [Homo sapiens]	common SCSs = 4		>XP_016876669.1 signal-induced proliferation-associated 1-like protein 1 isoform X1	4
>XP_016876674.1 signal-induced proliferation-associated 1-like protein 1 isoform X2 [Homo sapiens]	common SCSs = 4		>XP_016876674.1 signal-induced proliferation-associated 1-like protein 1 isoform X2	4
>XP_016877276.1 thyroid receptor-interacting protein 11 isoform X1 [Homo sapiens]	common SCSs = 4		>XP_016877276.1 thyroid receptor-interacting protein 11 isoform X1	4
>XP_016877277.1 thyroid receptor-interacting protein 11 isoform X2 [Homo sapiens]	common SCSs = 4		>XP_016877277.1 thyroid receptor-interacting protein 11 isoform X2	4
>XP_016877921.1 kinetochore scaffold 1 isoform X1 [Homo sapiens]	common SCSs = 4		>XP_016877921.1 kinetochore scaffold 1 isoform X1	4
>XP_016878176.1 protein dispatched homolog 2 isoform X1 [Homo sapiens]	common SCSs = 4		>XP_016878176.1 protein dispatched homolog 2 isoform X1	4
>XP_016878224.1 inositol hexakisphosphate and diphosphoinositol-pentakisphosphate kinase 1 isoform X1 [Homo sapiens]	common SCSs = 4		>XP_016878224.1 inositol hexakisphosphate and diphosphoinositol-pentakisphosphate kinase 1 isoform X1	4
>XP_016878225.1 inositol hexakisphosphate and diphosphoinositol-pentakisphosphate kinase 1 isoform X1 [Homo sapiens]	common SCSs = 4		>XP_016878225.1 inositol hexakisphosphate and diphosphoinositol-pentakisphosphate kinase 1 isoform X1	4
>XP_016878226.1 inositol hexakisphosphate and diphosphoinositol-pentakisphosphate kinase 1 isoform X1 [Homo sapiens]	common SCSs = 4		>XP_016878226.1 inositol hexakisphosphate and diphosphoinositol-pentakisphosphate kinase 1 isoform X1	4
>XP_016878227.1 inositol hexakisphosphate and diphosphoinositol-pentakisphosphate kinase 1 isoform X2 [Homo sapiens]	common SCSs = 4		>XP_016878227.1 inositol hexakisphosphate and diphosphoinositol-pentakisphosphate kinase 1 isoform X2	4
>XP_016878228.1 inositol hexakisphosphate and diphosphoinositol-pentakisphosphate kinase 1 isoform X3 [Homo sapiens]	common SCSs = 4		>XP_016878228.1 inositol hexakisphosphate and diphosphoinositol-pentakisphosphate kinase 1 isoform X3	4
>XP_016878230.1 inositol hexakisphosphate and diphosphoinositol-pentakisphosphate kinase 1 isoform X4 [Homo sapiens]	common SCSs = 4		>XP_016878230.1 inositol hexakisphosphate and diphosphoinositol-pentakisphosphate kinase 1 isoform X4	4
>XP_016878236.1 inositol hexakisphosphate and diphosphoinositol-pentakisphosphate kinase 1 isoform X5 [Homo sapiens]	common SCSs = 4		>XP_016878236.1 inositol hexakisphosphate and diphosphoinositol-pentakisphosphate kinase 1 isoform X5	4
>XP_016878237.1 inositol hexakisphosphate and diphosphoinositol-pentakisphosphate kinase 1 isoform X6 [Homo sapiens]	common SCSs = 4		>XP_016878237.1 inositol hexakisphosphate and diphosphoinositol-pentakisphosphate kinase 1 isoform X6	4
>XP_016878242.1 inositol hexakisphosphate and diphosphoinositol-pentakisphosphate kinase 1 isoform X7 [Homo sapiens]	common SCSs = 4		>XP_016878242.1 inositol hexakisphosphate and diphosphoinositol-pentakisphosphate kinase 1 isoform X7	4
>XP_016878243.1 inositol hexakisphosphate and diphosphoinositol-pentakisphosphate kinase 1 isoform X8 [Homo sapiens]	common SCSs = 4		>XP_016878243.1 inositol hexakisphosphate and diphosphoinositol-pentakisphosphate kinase 1 isoform X8	4
>XP_016878528.1 NLR family CARD domain-containing protein 3 isoform X4 [Homo sapiens]	common SCSs = 4		>XP_016878528.1 NLR family CARD domain-containing protein 3 isoform X4	4
>XP_016878555.1 serine/threonine-protein kinase SMG1 isoform X3 [Homo sapiens]	common SCSs = 4		>XP_016878555.1 serine/threonine-protein kinase SMG1 isoform X3	4
>XP_016878677.1 general transcription factor 3C polypeptide 1 isoform X1 [Homo sapiens]	common SCSs = 4		>XP_016878677.1 general transcription factor 3C polypeptide 1 isoform X1	4
>XP_016878835.1 hydrocephalus-inducing protein homolog isoform X3 [Homo sapiens]	common SCSs = 4		>XP_016878835.1 hydrocephalus-inducing protein homolog isoform X3	4
>XP_016879466.1 putative short-chain dehydrogenase/reductase family 42E member 2 isoform X1 [Homo sapiens]	common SCSs = 4		>XP_016879466.1 putative short-chain dehydrogenase/reductase family 42E member 2 isoform X1	4
>XP_016879467.1 putative short-chain dehydrogenase/reductase family 42E member 2 isoform X2 [Homo sapiens]	common SCSs = 4		>XP_016879467.1 putative short-chain dehydrogenase/reductase family 42E member 2 isoform X2	4
>XP_016879553.1 chromodomain-helicase-DNA-binding protein 3 isoform X9 [Homo sapiens]	common SCSs = 4		>XP_016879553.1 chromodomain-helicase-DNA-binding protein 3 isoform X9	4
>XP_016879559.1 chromodomain-helicase-DNA-binding protein 3 isoform X17 [Homo sapiens]	common SCSs = 4		>XP_016879559.1 chromodomain-helicase-DNA-binding protein 3 isoform X17	4
>XP_016879639.1 kinesin-like protein KIF19 isoform X1 [Homo sapiens]	common SCSs = 4		>XP_016879639.1 kinesin-like protein KIF19 isoform X1	4
>XP_016879640.1 kinesin-like protein KIF19 isoform X2 [Homo sapiens]	common SCSs = 4		>XP_016879640.1 kinesin-like protein KIF19 isoform X2	4
>XP_016879641.1 kinesin-like protein KIF19 isoform X4 [Homo sapiens]	common SCSs = 4		>XP_016879641.1 kinesin-like protein KIF19 isoform X4	4
>XP_016879642.1 kinesin-like protein KIF19 isoform X5 [Homo sapiens]	common SCSs = 4		>XP_016879642.1 kinesin-like protein KIF19 isoform X5	4
>XP_016879643.1 kinesin-like protein KIF19 isoform X7 [Homo sapiens]	common SCSs = 4		>XP_016879643.1 kinesin-like protein KIF19 isoform X7	4
>XP_016879644.1 kinesin-like protein KIF19 isoform X8 [Homo sapiens]	common SCSs = 4		>XP_016879644.1 kinesin-like protein KIF19 isoform X8	4
>XP_016879645.1 kinesin-like protein KIF19 isoform X9 [Homo sapiens]	common SCSs = 4		>XP_016879645.1 kinesin-like protein KIF19 isoform X9	4
>XP_016879646.1 kinesin-like protein KIF19 isoform X10 [Homo sapiens]	common SCSs = 4		>XP_016879646.1 kinesin-like protein KIF19 isoform X10	4
>XP_016879647.1 kinesin-like protein KIF19 isoform X11 [Homo sapiens]	common SCSs = 4		>XP_016879647.1 kinesin-like protein KIF19 isoform X11	4
>XP_016880722.1 ubiquitin carboxyl-terminal hydrolase 32 isoform X8 [Homo sapiens]	common SCSs = 4		>XP_016880722.1 ubiquitin carboxyl-terminal hydrolase 32 isoform X8	4
>XP_016880885.1 nuclear receptor corepressor 1 isoform X1 [Homo sapiens]	common SCSs = 4		>XP_016880885.1 nuclear receptor corepressor 1 isoform X1	4
>XP_016880886.1 nuclear receptor corepressor 1 isoform X1 [Homo sapiens]	common SCSs = 4		>XP_016880886.1 nuclear receptor corepressor 1 isoform X1	4
>XP_016880887.1 nuclear receptor corepressor 1 isoform X1 [Homo sapiens]	common SCSs = 4		>XP_016880887.1 nuclear receptor corepressor 1 isoform X1	4
>XP_016880888.1 nuclear receptor corepressor 1 isoform X1 [Homo sapiens]	common SCSs = 4		>XP_016880888.1 nuclear receptor corepressor 1 isoform X1	4
>XP_016880889.1 nuclear receptor corepressor 1 isoform X2 [Homo sapiens]	common SCSs = 4		>XP_016880889.1 nuclear receptor corepressor 1 isoform X2	4
>XP_016880890.1 nuclear receptor corepressor 1 isoform X2 [Homo sapiens]	common SCSs = 4		>XP_016880890.1 nuclear receptor corepressor 1 isoform X2	4
>XP_016880891.1 nuclear receptor corepressor 1 isoform X2 [Homo sapiens]	common SCSs = 4		>XP_016880891.1 nuclear receptor corepressor 1 isoform X2	4
>XP_016880892.1 nuclear receptor corepressor 1 isoform X4 [Homo sapiens]	common SCSs = 4		>XP_016880892.1 nuclear receptor corepressor 1 isoform X4	4
>XP_016880893.1 nuclear receptor corepressor 1 isoform X4 [Homo sapiens]	common SCSs = 4		>XP_016880893.1 nuclear receptor corepressor 1 isoform X4	4
>XP_016880894.1 nuclear receptor corepressor 1 isoform X4 [Homo sapiens]	common SCSs = 4		>XP_016880894.1 nuclear receptor corepressor 1 isoform X4	4
>XP_016880895.1 nuclear receptor corepressor 1 isoform X4 [Homo sapiens]	common SCSs = 4		>XP_016880895.1 nuclear receptor corepressor 1 isoform X4	4
>XP_016880896.1 nuclear receptor corepressor 1 isoform X4 [Homo sapiens]	common SCSs = 4		>XP_016880896.1 nuclear receptor corepressor 1 isoform X4	4
>XP_016880897.1 nuclear receptor corepressor 1 isoform X4 [Homo sapiens]	common SCSs = 4		>XP_016880897.1 nuclear receptor corepressor 1 isoform X4	4
>XP_016880898.1 nuclear receptor corepressor 1 isoform X5 [Homo sapiens]	common SCSs = 4		>XP_016880898.1 nuclear receptor corepressor 1 isoform X5	4
>XP_016880899.1 nuclear receptor corepressor 1 isoform X5 [Homo sapiens]	common SCSs = 4		>XP_016880899.1 nuclear receptor corepressor 1 isoform X5	4
>XP_016880900.1 nuclear receptor corepressor 1 isoform X5 [Homo sapiens]	common SCSs = 4		>XP_016880900.1 nuclear receptor corepressor 1 isoform X5	4
>XP_016880901.1 nuclear receptor corepressor 1 isoform X5 [Homo sapiens]	common SCSs = 4		>XP_016880901.1 nuclear receptor corepressor 1 isoform X5	4
>XP_016880902.1 nuclear receptor corepressor 1 isoform X5 [Homo sapiens]	common SCSs = 4		>XP_016880902.1 nuclear receptor corepressor 1 isoform X5	4
>XP_016880903.1 nuclear receptor corepressor 1 isoform X5 [Homo sapiens]	common SCSs = 4		>XP_016880903.1 nuclear receptor corepressor 1 isoform X5	4
>XP_016880904.1 nuclear receptor corepressor 1 isoform X9 [Homo sapiens]	common SCSs = 4		>XP_016880904.1 nuclear receptor corepressor 1 isoform X9	4
>XP_016880905.1 nuclear receptor corepressor 1 isoform X10 [Homo sapiens]	common SCSs = 4		>XP_016880905.1 nuclear receptor corepressor 1 isoform X10	4
>XP_016880907.1 nuclear receptor corepressor 1 isoform X14 [Homo sapiens]	common SCSs = 4		>XP_016880907.1 nuclear receptor corepressor 1 isoform X14	4
>XP_016880908.1 nuclear receptor corepressor 1 isoform X15 [Homo sapiens]	common SCSs = 4		>XP_016880908.1 nuclear receptor corepressor 1 isoform X15	4
>XP_016881232.1 laminin subunit alpha-3 isoform X6 [Homo sapiens]	common SCSs = 4		>XP_016881232.1 laminin subunit alpha-3 isoform X6	4
>XP_016881498.1 FH1/FH2 domain-containing protein 3 isoform X11 [Homo sapiens]	common SCSs = 4		>XP_016881498.1 FH1/FH2 domain-containing protein 3 isoform X11	4
>XP_016882639.1 pleckstrin homology domain-containing family G member 2 isoform X3 [Homo sapiens]	common SCSs = 4		>XP_016882639.1 pleckstrin homology domain-containing family G member 2 isoform X3	4
>XP_016882640.1 pleckstrin homology domain-containing family G member 2 isoform X4 [Homo sapiens]	common SCSs = 4		>XP_016882640.1 pleckstrin homology domain-containing family G member 2 isoform X4	4
>XP_016882931.1 coiled-coil domain-containing protein 97 isoform X1 [Homo sapiens]	common SCSs = 4		>XP_016882931.1 coiled-coil domain-containing protein 97 isoform X1	4
>XP_016883228.1 nuclear receptor coactivator 6 isoform X1 [Homo sapiens]	common SCSs = 4		>XP_016883228.1 nuclear receptor coactivator 6 isoform X1	4
>XP_016883229.1 nuclear receptor coactivator 6 isoform X1 [Homo sapiens]	common SCSs = 4		>XP_016883229.1 nuclear receptor coactivator 6 isoform X1	4
>XP_016883230.1 nuclear receptor coactivator 6 isoform X2 [Homo sapiens]	common SCSs = 4		>XP_016883230.1 nuclear receptor coactivator 6 isoform X2	4
>XP_016883231.1 nuclear receptor coactivator 6 isoform X3 [Homo sapiens]	common SCSs = 4		>XP_016883231.1 nuclear receptor coactivator 6 isoform X3	4
>XP_016883232.1 nuclear receptor coactivator 6 isoform X5 [Homo sapiens]	common SCSs = 4		>XP_016883232.1 nuclear receptor coactivator 6 isoform X5	4
>XP_016883233.1 nuclear receptor coactivator 6 isoform X8 [Homo sapiens]	common SCSs = 4		>XP_016883233.1 nuclear receptor coactivator 6 isoform X8	4
>XP_016883235.1 nuclear receptor coactivator 6 isoform X10 [Homo sapiens]	common SCSs = 4		>XP_016883235.1 nuclear receptor coactivator 6 isoform X10	4
>XP_016883236.1 nuclear receptor coactivator 6 isoform X12 [Homo sapiens]	common SCSs = 4		>XP_016883236.1 nuclear receptor coactivator 6 isoform X12	4
>XP_016883237.1 nuclear receptor coactivator 6 isoform X13 [Homo sapiens]	common SCSs = 4		>XP_016883237.1 nuclear receptor coactivator 6 isoform X13	4
>XP_016883238.1 nuclear receptor coactivator 6 isoform X14 [Homo sapiens]	common SCSs = 4		>XP_016883238.1 nuclear receptor coactivator 6 isoform X14	4
>XP_016883962.1 nuclear receptor-interacting protein 1 isoform X1 [Homo sapiens]	common SCSs = 4		>XP_016883962.1 nuclear receptor-interacting protein 1 isoform X1	4
>XP_016883963.1 nuclear receptor-interacting protein 1 isoform X1 [Homo sapiens]	common SCSs = 4		>XP_016883963.1 nuclear receptor-interacting protein 1 isoform X1	4
>XP_016883964.1 nuclear receptor-interacting protein 1 isoform X1 [Homo sapiens]	common SCSs = 4		>XP_016883964.1 nuclear receptor-interacting protein 1 isoform X1	4
>XP_016883965.1 nuclear receptor-interacting protein 1 isoform X1 [Homo sapiens]	common SCSs = 4		>XP_016883965.1 nuclear receptor-interacting protein 1 isoform X1	4
>XP_016883996.1 uromodulin-like 1 isoform X2 [Homo sapiens]	common SCSs = 4		>XP_016883996.1 uromodulin-like 1 isoform X2	4
>XP_016884501.1 unconventional myosin-XVIIIb isoform X1 [Homo sapiens]	common SCSs = 4		>XP_016884501.1 unconventional myosin-XVIIIb isoform X1	4
>XP_016884502.1 unconventional myosin-XVIIIb isoform X1 [Homo sapiens]	common SCSs = 4		>XP_016884502.1 unconventional myosin-XVIIIb isoform X1	4
>XP_016884503.1 unconventional myosin-XVIIIb isoform X4 [Homo sapiens]	common SCSs = 4		>XP_016884503.1 unconventional myosin-XVIIIb isoform X4	4
>XP_016884504.1 unconventional myosin-XVIIIb isoform X5 [Homo sapiens]	common SCSs = 4		>XP_016884504.1 unconventional myosin-XVIIIb isoform X5	4
>XP_016884905.1 protocadherin-11 X-linked isoform X1 [Homo sapiens]	common SCSs = 4		>XP_016884905.1 protocadherin-11 X-linked isoform X1	4
>XP_016884906.1 protocadherin-11 X-linked isoform X2 [Homo sapiens]	common SCSs = 4		>XP_016884906.1 protocadherin-11 X-linked isoform X2	4
>XP_016884907.1 protocadherin-11 X-linked isoform X4 [Homo sapiens]	common SCSs = 4		>XP_016884907.1 protocadherin-11 X-linked isoform X4	4
>XP_016884908.1 protocadherin-11 X-linked isoform X7 [Homo sapiens]	common SCSs = 4		>XP_016884908.1 protocadherin-11 X-linked isoform X7	4
>XP_016884909.1 protocadherin-11 X-linked isoform X8 [Homo sapiens]	common SCSs = 4		>XP_016884909.1 protocadherin-11 X-linked isoform X8	4
>XP_016885230.1 serine/threonine-protein kinase WNK3 isoform X1 [Homo sapiens]	common SCSs = 4		>XP_016885230.1 serine/threonine-protein kinase WNK3 isoform X1	4
>XP_016885231.1 serine/threonine-protein kinase WNK3 isoform X1 [Homo sapiens]	common SCSs = 4		>XP_016885231.1 serine/threonine-protein kinase WNK3 isoform X1	4
>XP_016885232.1 serine/threonine-protein kinase WNK3 isoform X1 [Homo sapiens]	common SCSs = 4		>XP_016885232.1 serine/threonine-protein kinase WNK3 isoform X1	4
>XP_016885233.1 serine/threonine-protein kinase WNK3 isoform X1 [Homo sapiens]	common SCSs = 4		>XP_016885233.1 serine/threonine-protein kinase WNK3 isoform X1	4
>XP_016885234.1 serine/threonine-protein kinase WNK3 isoform X2 [Homo sapiens]	common SCSs = 4		>XP_016885234.1 serine/threonine-protein kinase WNK3 isoform X2	4
>XP_016885568.1 protocadherin-11 Y-linked isoform X1 [Homo sapiens]	common SCSs = 4		>XP_016885568.1 protocadherin-11 Y-linked isoform X1	4
>XP_016885569.1 protocadherin-11 Y-linked isoform X1 [Homo sapiens]	common SCSs = 4		>XP_016885569.1 protocadherin-11 Y-linked isoform X1	4
>XP_016885570.1 protocadherin-11 Y-linked isoform X1 [Homo sapiens]	common SCSs = 4		>XP_016885570.1 protocadherin-11 Y-linked isoform X1	4
>XP_024301918.1 histone-lysine N-methyltransferase, H3 lysine-36 specific isoform X1 [Homo sapiens]	common SCSs = 4		>XP_024301918.1 histone-lysine N-methyltransferase, H3 lysine-36 specific isoform X1	4
>XP_024301919.1 histone-lysine N-methyltransferase, H3 lysine-36 specific isoform X1 [Homo sapiens]	common SCSs = 4		>XP_024301919.1 histone-lysine N-methyltransferase, H3 lysine-36 specific isoform X1	4
>XP_024301920.1 histone-lysine N-methyltransferase, H3 lysine-36 specific isoform X1 [Homo sapiens]	common SCSs = 4		>XP_024301920.1 histone-lysine N-methyltransferase, H3 lysine-36 specific isoform X1	4
>XP_024301921.1 histone-lysine N-methyltransferase, H3 lysine-36 specific isoform X1 [Homo sapiens]	common SCSs = 4		>XP_024301921.1 histone-lysine N-methyltransferase, H3 lysine-36 specific isoform X1	4
>XP_024301922.1 histone-lysine N-methyltransferase, H3 lysine-36 specific isoform X2 [Homo sapiens]	common SCSs = 4		>XP_024301922.1 histone-lysine N-methyltransferase, H3 lysine-36 specific isoform X2	4
>XP_024301923.1 histone-lysine N-methyltransferase, H3 lysine-36 specific isoform X3 [Homo sapiens]	common SCSs = 4		>XP_024301923.1 histone-lysine N-methyltransferase, H3 lysine-36 specific isoform X3	4
>XP_024301924.1 histone-lysine N-methyltransferase, H3 lysine-36 specific isoform X3 [Homo sapiens]	common SCSs = 4		>XP_024301924.1 histone-lysine N-methyltransferase, H3 lysine-36 specific isoform X3	4
>XP_024301926.1 histone-lysine N-methyltransferase, H3 lysine-36 specific isoform X3 [Homo sapiens]	common SCSs = 4		>XP_024301926.1 histone-lysine N-methyltransferase, H3 lysine-36 specific isoform X3	4
>XP_024301927.1 histone-lysine N-methyltransferase, H3 lysine-36 specific isoform X4 [Homo sapiens]	common SCSs = 4		>XP_024301927.1 histone-lysine N-methyltransferase, H3 lysine-36 specific isoform X4	4
>XP_024301951.1 ciliogenesis and planar polarity effector 1 isoform X9 [Homo sapiens]	common SCSs = 4		>XP_024301951.1 ciliogenesis and planar polarity effector 1 isoform X9	4
>XP_024301952.1 ciliogenesis and planar polarity effector 1 isoform X10 [Homo sapiens]	common SCSs = 4		>XP_024301952.1 ciliogenesis and planar polarity effector 1 isoform X10	4
>XP_024301953.1 ciliogenesis and planar polarity effector 1 isoform X11 [Homo sapiens]	common SCSs = 4		>XP_024301953.1 ciliogenesis and planar polarity effector 1 isoform X11	4
>XP_024301954.1 ciliogenesis and planar polarity effector 1 isoform X13 [Homo sapiens]	common SCSs = 4		>XP_024301954.1 ciliogenesis and planar polarity effector 1 isoform X13	4
>XP_024301958.1 sodium-dependent proline transporter isoform X2 [Homo sapiens]	common SCSs = 4		>XP_024301958.1 sodium-dependent proline transporter isoform X2	4
>XP_024302178.1 glutamate receptor ionotropic, kainate 2 isoform X2 [Homo sapiens]	common SCSs = 4		>XP_024302178.1 glutamate receptor ionotropic, kainate 2 isoform X2	4
>XP_024302179.1 glutamate receptor ionotropic, kainate 2 isoform X3 [Homo sapiens]	common SCSs = 4		>XP_024302179.1 glutamate receptor ionotropic, kainate 2 isoform X3	4
>XP_024302229.1 AT-hook DNA-binding motif-containing protein 1 isoform X1 [Homo sapiens]	common SCSs = 4		>XP_024302229.1 AT-hook DNA-binding motif-containing protein 1 isoform X1	4
>XP_024302265.1 NHS-like protein 1 isoform X14 [Homo sapiens]	common SCSs = 4		>XP_024302265.1 NHS-like protein 1 isoform X14	4
>XP_024302758.1 maltase-glucoamylase, intestinal isoform X2 [Homo sapiens]	common SCSs = 4		>XP_024302758.1 maltase-glucoamylase, intestinal isoform X2	4
>XP_024303537.1 sorbin and SH3 domain-containing protein 1 isoform X5 [Homo sapiens]	common SCSs = 4		>XP_024303537.1 sorbin and SH3 domain-containing protein 1 isoform X5	4
>XP_024303538.1 sorbin and SH3 domain-containing protein 1 isoform X8 [Homo sapiens]	common SCSs = 4		>XP_024303538.1 sorbin and SH3 domain-containing protein 1 isoform X8	4
>XP_024304073.1 protein enabled homolog isoform X1 [Homo sapiens]	common SCSs = 4		>XP_024304073.1 protein enabled homolog isoform X1	4
>XP_024304074.1 protein enabled homolog isoform X2 [Homo sapiens]	common SCSs = 4		>XP_024304074.1 protein enabled homolog isoform X2	4
>XP_024304075.1 protein enabled homolog isoform X3 [Homo sapiens]	common SCSs = 4		>XP_024304075.1 protein enabled homolog isoform X3	4
>XP_024304076.1 protein enabled homolog isoform X4 [Homo sapiens]	common SCSs = 4		>XP_024304076.1 protein enabled homolog isoform X4	4
>XP_024304086.1 protein enabled homolog isoform X19 [Homo sapiens]	common SCSs = 4		>XP_024304086.1 protein enabled homolog isoform X19	4
>XP_024304087.1 protein enabled homolog isoform X20 [Homo sapiens]	common SCSs = 4		>XP_024304087.1 protein enabled homolog isoform X20	4
>XP_024304124.1 pleckstrin homology domain-containing family A member 7 isoform X1 [Homo sapiens]	common SCSs = 4		>XP_024304124.1 pleckstrin homology domain-containing family A member 7 isoform X1	4
>XP_024304125.1 pleckstrin homology domain-containing family A member 7 isoform X2 [Homo sapiens]	common SCSs = 4		>XP_024304125.1 pleckstrin homology domain-containing family A member 7 isoform X2	4
>XP_024304126.1 pleckstrin homology domain-containing family A member 7 isoform X3 [Homo sapiens]	common SCSs = 4		>XP_024304126.1 pleckstrin homology domain-containing family A member 7 isoform X3	4
>XP_024304127.1 pleckstrin homology domain-containing family A member 7 isoform X4 [Homo sapiens]	common SCSs = 4		>XP_024304127.1 pleckstrin homology domain-containing family A member 7 isoform X4	4
>XP_024304128.1 pleckstrin homology domain-containing family A member 7 isoform X5 [Homo sapiens]	common SCSs = 4		>XP_024304128.1 pleckstrin homology domain-containing family A member 7 isoform X5	4
>XP_024304129.1 pleckstrin homology domain-containing family A member 7 isoform X6 [Homo sapiens]	common SCSs = 4		>XP_024304129.1 pleckstrin homology domain-containing family A member 7 isoform X6	4
>XP_024304130.1 pleckstrin homology domain-containing family A member 7 isoform X7 [Homo sapiens]	common SCSs = 4		>XP_024304130.1 pleckstrin homology domain-containing family A member 7 isoform X7	4
>XP_024304131.1 pleckstrin homology domain-containing family A member 7 isoform X8 [Homo sapiens]	common SCSs = 4		>XP_024304131.1 pleckstrin homology domain-containing family A member 7 isoform X8	4
>XP_024304132.1 pleckstrin homology domain-containing family A member 7 isoform X9 [Homo sapiens]	common SCSs = 4		>XP_024304132.1 pleckstrin homology domain-containing family A member 7 isoform X9	4
>XP_024304133.1 pleckstrin homology domain-containing family A member 7 isoform X10 [Homo sapiens]	common SCSs = 4		>XP_024304133.1 pleckstrin homology domain-containing family A member 7 isoform X10	4
>XP_024304134.1 pleckstrin homology domain-containing family A member 7 isoform X11 [Homo sapiens]	common SCSs = 4		>XP_024304134.1 pleckstrin homology domain-containing family A member 7 isoform X11	4
>XP_024304135.1 pleckstrin homology domain-containing family A member 7 isoform X11 [Homo sapiens]	common SCSs = 4		>XP_024304135.1 pleckstrin homology domain-containing family A member 7 isoform X11	4
>XP_024304136.1 pleckstrin homology domain-containing family A member 7 isoform X11 [Homo sapiens]	common SCSs = 4		>XP_024304136.1 pleckstrin homology domain-containing family A member 7 isoform X11	4
>XP_024304137.1 pleckstrin homology domain-containing family A member 7 isoform X11 [Homo sapiens]	common SCSs = 4		>XP_024304137.1 pleckstrin homology domain-containing family A member 7 isoform X11	4
>XP_024304238.1 doublecortin domain-containing protein 1 isoform X1 [Homo sapiens]	common SCSs = 4		>XP_024304238.1 doublecortin domain-containing protein 1 isoform X1	4
>XP_024304239.1 doublecortin domain-containing protein 1 isoform X1 [Homo sapiens]	common SCSs = 4		>XP_024304239.1 doublecortin domain-containing protein 1 isoform X1	4
>XP_024304240.1 doublecortin domain-containing protein 1 isoform X1 [Homo sapiens]	common SCSs = 4		>XP_024304240.1 doublecortin domain-containing protein 1 isoform X1	4
>XP_024304241.1 doublecortin domain-containing protein 1 isoform X1 [Homo sapiens]	common SCSs = 4		>XP_024304241.1 doublecortin domain-containing protein 1 isoform X1	4
>XP_024304243.1 doublecortin domain-containing protein 1 isoform X3 [Homo sapiens]	common SCSs = 4		>XP_024304243.1 doublecortin domain-containing protein 1 isoform X3	4
>XP_024304244.1 doublecortin domain-containing protein 1 isoform X4 [Homo sapiens]	common SCSs = 4		>XP_024304244.1 doublecortin domain-containing protein 1 isoform X4	4
>XP_024304245.1 doublecortin domain-containing protein 1 isoform X5 [Homo sapiens]	common SCSs = 4		>XP_024304245.1 doublecortin domain-containing protein 1 isoform X5	4
>XP_024304246.1 doublecortin domain-containing protein 1 isoform X6 [Homo sapiens]	common SCSs = 4		>XP_024304246.1 doublecortin domain-containing protein 1 isoform X6	4
>XP_024304247.1 doublecortin domain-containing protein 1 isoform X7 [Homo sapiens]	common SCSs = 4		>XP_024304247.1 doublecortin domain-containing protein 1 isoform X7	4
>XP_024304248.1 doublecortin domain-containing protein 1 isoform X8 [Homo sapiens]	common SCSs = 4		>XP_024304248.1 doublecortin domain-containing protein 1 isoform X8	4
>XP_024304249.1 doublecortin domain-containing protein 1 isoform X9 [Homo sapiens]	common SCSs = 4		>XP_024304249.1 doublecortin domain-containing protein 1 isoform X9	4
>XP_024304526.1 neuron navigator 2 isoform X9 [Homo sapiens]	common SCSs = 4		>XP_024304526.1 neuron navigator 2 isoform X9	4
>XP_024305106.1 neurobeachin isoform X9 [Homo sapiens]	common SCSs = 4		>XP_024305106.1 neurobeachin isoform X9	4
>XP_024305231.1 protein AHNAK2 isoform X1 [Homo sapiens]	common SCSs = 4		>XP_024305231.1 protein AHNAK2 isoform X1	4
>XP_024305294.1 E3 ubiquitin-protein ligase HECTD1 isoform X2 [Homo sapiens]	common SCSs = 4		>XP_024305294.1 E3 ubiquitin-protein ligase HECTD1 isoform X2	4
>XP_024305295.1 E3 ubiquitin-protein ligase HECTD1 isoform X5 [Homo sapiens]	common SCSs = 4		>XP_024305295.1 E3 ubiquitin-protein ligase HECTD1 isoform X5	4
>XP_024305297.1 signal-induced proliferation-associated 1-like protein 1 isoform X1 [Homo sapiens]	common SCSs = 4		>XP_024305297.1 signal-induced proliferation-associated 1-like protein 1 isoform X1	4
>XP_024305298.1 signal-induced proliferation-associated 1-like protein 1 isoform X2 [Homo sapiens]	common SCSs = 4		>XP_024305298.1 signal-induced proliferation-associated 1-like protein 1 isoform X2	4
>XP_024305299.1 signal-induced proliferation-associated 1-like protein 1 isoform X3 [Homo sapiens]	common SCSs = 4		>XP_024305299.1 signal-induced proliferation-associated 1-like protein 1 isoform X3	4
>XP_024305300.1 signal-induced proliferation-associated 1-like protein 1 isoform X3 [Homo sapiens]	common SCSs = 4		>XP_024305300.1 signal-induced proliferation-associated 1-like protein 1 isoform X3	4
>XP_024305301.1 signal-induced proliferation-associated 1-like protein 1 isoform X4 [Homo sapiens]	common SCSs = 4		>XP_024305301.1 signal-induced proliferation-associated 1-like protein 1 isoform X4	4
>XP_024305302.1 signal-induced proliferation-associated 1-like protein 1 isoform X5 [Homo sapiens]	common SCSs = 4		>XP_024305302.1 signal-induced proliferation-associated 1-like protein 1 isoform X5	4
>XP_024305303.1 signal-induced proliferation-associated 1-like protein 1 isoform X6 [Homo sapiens]	common SCSs = 4		>XP_024305303.1 signal-induced proliferation-associated 1-like protein 1 isoform X6	4
>XP_024305759.1 protein FAM214A isoform X1 [Homo sapiens]	common SCSs = 4		>XP_024305759.1 protein FAM214A isoform X1	4
>XP_024305966.1 serine/threonine-protein kinase SMG1 isoform X5 [Homo sapiens]	common SCSs = 4		>XP_024305966.1 serine/threonine-protein kinase SMG1 isoform X5	4
>XP_024305967.1 serine/threonine-protein kinase SMG1 isoform X5 [Homo sapiens]	common SCSs = 4		>XP_024305967.1 serine/threonine-protein kinase SMG1 isoform X5	4
>XP_024306129.1 caskin-1 isoform X1 [Homo sapiens]	common SCSs = 4		>XP_024306129.1 caskin-1 isoform X1	4
>XP_024306372.1 dynein heavy chain 2, axonemal isoform X1 [Homo sapiens]	common SCSs = 4		>XP_024306372.1 dynein heavy chain 2, axonemal isoform X1	4
>XP_024306373.1 dynein heavy chain 2, axonemal isoform X1 [Homo sapiens]	common SCSs = 4		>XP_024306373.1 dynein heavy chain 2, axonemal isoform X1	4
>XP_024306374.1 dynein heavy chain 2, axonemal isoform X3 [Homo sapiens]	common SCSs = 4		>XP_024306374.1 dynein heavy chain 2, axonemal isoform X3	4
>XP_024306375.1 dynein heavy chain 2, axonemal isoform X4 [Homo sapiens]	common SCSs = 4		>XP_024306375.1 dynein heavy chain 2, axonemal isoform X4	4
>XP_024306765.1 calcium/calmodulin-dependent protein kinase kinase 1 isoform X5 [Homo sapiens]	common SCSs = 4		>XP_024306765.1 calcium/calmodulin-dependent protein kinase kinase 1 isoform X5	4
>XP_024306782.1 dynein heavy chain 17, axonemal isoform X3 [Homo sapiens]	common SCSs = 4		>XP_024306782.1 dynein heavy chain 17, axonemal isoform X3	4
>XP_024306809.1 nuclear receptor corepressor 1 isoform X2 [Homo sapiens]	common SCSs = 4		>XP_024306809.1 nuclear receptor corepressor 1 isoform X2	4
>XP_024306810.1 nuclear receptor corepressor 1 isoform X4 [Homo sapiens]	common SCSs = 4		>XP_024306810.1 nuclear receptor corepressor 1 isoform X4	4
>XP_024306811.1 nuclear receptor corepressor 1 isoform X5 [Homo sapiens]	common SCSs = 4		>XP_024306811.1 nuclear receptor corepressor 1 isoform X5	4
>XP_024307576.1 transcription factor-like 5 protein isoform X1 [Homo sapiens]	common SCSs = 4		>XP_024307576.1 transcription factor-like 5 protein isoform X1	4
>XP_024307577.1 transcription factor-like 5 protein isoform X4 [Homo sapiens]	common SCSs = 4		>XP_024307577.1 transcription factor-like 5 protein isoform X4	4
>XP_024307578.1 transcription factor-like 5 protein isoform X5 [Homo sapiens]	common SCSs = 4		>XP_024307578.1 transcription factor-like 5 protein isoform X5	4
>XP_024307579.1 transcription factor-like 5 protein isoform X6 [Homo sapiens]	common SCSs = 4		>XP_024307579.1 transcription factor-like 5 protein isoform X6	4
>XP_024307580.1 transcription factor-like 5 protein isoform X7 [Homo sapiens]	common SCSs = 4		>XP_024307580.1 transcription factor-like 5 protein isoform X7	4
>XP_024307581.1 transcription factor-like 5 protein isoform X8 [Homo sapiens]	common SCSs = 4		>XP_024307581.1 transcription factor-like 5 protein isoform X8	4
>XP_024307774.1 helicase with zinc finger domain 2 isoform X1 [Homo sapiens]	common SCSs = 4		>XP_024307774.1 helicase with zinc finger domain 2 isoform X1	4
>XP_024307775.1 helicase with zinc finger domain 2 isoform X2 [Homo sapiens]	common SCSs = 4		>XP_024307775.1 helicase with zinc finger domain 2 isoform X2	4
>XP_024308962.1 protein TANC1 isoform X21 [Homo sapiens]	common SCSs = 4		>XP_024308962.1 protein TANC1 isoform X21	4
>XP_024309291.1 microtubule-associated protein 4 isoform X1 [Homo sapiens]	common SCSs = 4		>XP_024309291.1 microtubule-associated protein 4 isoform X1	4
>XP_024309292.1 microtubule-associated protein 4 isoform X6 [Homo sapiens]	common SCSs = 4		>XP_024309292.1 microtubule-associated protein 4 isoform X6	4
>XP_024309293.1 microtubule-associated protein 4 isoform X8 [Homo sapiens]	common SCSs = 4		>XP_024309293.1 microtubule-associated protein 4 isoform X8	4
>XP_024309294.1 microtubule-associated protein 4 isoform X11 [Homo sapiens]	common SCSs = 4		>XP_024309294.1 microtubule-associated protein 4 isoform X11	4
>XP_024309295.1 microtubule-associated protein 4 isoform X12 [Homo sapiens]	common SCSs = 4		>XP_024309295.1 microtubule-associated protein 4 isoform X12	4
>XP_024309296.1 microtubule-associated protein 4 isoform X13 [Homo sapiens]	common SCSs = 4		>XP_024309296.1 microtubule-associated protein 4 isoform X13	4
>XP_024309388.1 histone-lysine N-methyltransferase SETD5 isoform X3 [Homo sapiens]	common SCSs = 4		>XP_024309388.1 histone-lysine N-methyltransferase SETD5 isoform X3	4
>XP_024309389.1 histone-lysine N-methyltransferase SETD5 isoform X15 [Homo sapiens]	common SCSs = 4		>XP_024309389.1 histone-lysine N-methyltransferase SETD5 isoform X15	4
>XP_024309676.1 homeodomain-interacting protein kinase 1 isoform X5 [Homo sapiens]	common SCSs = 4		>XP_024309676.1 homeodomain-interacting protein kinase 1 isoform X5	4
>XP_024309860.1 fibroblast growth factor receptor-like 1 isoform X1 [Homo sapiens]	common SCSs = 4		>XP_024309860.1 fibroblast growth factor receptor-like 1 isoform X1	4
>XP_024309861.1 fibroblast growth factor receptor-like 1 isoform X2 [Homo sapiens]	common SCSs = 4		>XP_024309861.1 fibroblast growth factor receptor-like 1 isoform X2	4
>NP_000005.3 alpha-2-macroglobulin isoform a precursor [Homo sapiens]	common SCSs = 3		>NP_000005.3 alpha-2-macroglobulin isoform a precursor	3
>NP_000028.3 ankyrin-1 isoform 3 [Homo sapiens]	common SCSs = 3		>NP_000028.3 ankyrin-1 isoform 3	3
>NP_000043.4 copper-transporting ATPase 1 isoform 1 [Homo sapiens]	common SCSs = 3		>NP_000043.4 copper-transporting ATPase 1 isoform 1	3
>NP_000050.3 breast cancer type 2 susceptibility protein [Homo sapiens]	common SCSs = 3		>NP_000050.3 breast cancer type 2 susceptibility protein	3
>NP_000072.2 lysosomal-trafficking regulator [Homo sapiens]	common SCSs = 3		>NP_000072.2 lysosomal-trafficking regulator	3
>NP_000085.1 collagen alpha-1(VII) chain precursor [Homo sapiens]	common SCSs = 3		>NP_000085.1 collagen alpha-1(VII) chain precursor	3
>NP_000129.3 fibrillin-1 preproprotein [Homo sapiens]	common SCSs = 3		>NP_000129.3 fibrillin-1 preproprotein	3
>NP_000156.1 gap junction alpha-1 protein [Homo sapiens]	common SCSs = 3		>NP_000156.1 gap junction alpha-1 protein	3
>NP_000161.2 glycine dehydrogenase (decarboxylating), mitochondrial precursor [Homo sapiens]	common SCSs = 3		>NP_000161.2 glycine dehydrogenase (decarboxylating), mitochondrial precursor	3
>NP_000215.1 keratin, type I cytoskeletal 18 [Homo sapiens]	common SCSs = 3		>NP_000215.1 keratin, type I cytoskeletal 18	3
>NP_000277.1 peroxisome assembly protein 12 [Homo sapiens]	common SCSs = 3		>NP_000277.1 peroxisome assembly protein 12	3
>NP_000284.1 phosphorylase b kinase regulatory subunit beta isoform a [Homo sapiens]	common SCSs = 3		>NP_000284.1 phosphorylase b kinase regulatory subunit beta isoform a	3
>NP_000287.4 polycystin-1 isoform 2 precursor [Homo sapiens]	common SCSs = 3		>NP_000287.4 polycystin-1 isoform 2 precursor	3
>NP_000492.2 elastin isoform a precursor [Homo sapiens]	common SCSs = 3		>NP_000492.2 elastin isoform a precursor	3
>NP_000493.1 eosinophil peroxidase preproprotein [Homo sapiens]	common SCSs = 3		>NP_000493.1 eosinophil peroxidase preproprotein	3
>NP_000594.2 nitric oxide synthase, endothelial isoform 1 [Homo sapiens]	common SCSs = 3		>NP_000594.2 nitric oxide synthase, endothelial isoform 1	3
>NP_000680.2 retinal dehydrogenase 1 [Homo sapiens]	common SCSs = 3		>NP_000680.2 retinal dehydrogenase 1	3
>NP_000690.1 pancreatic alpha-amylase precursor [Homo sapiens]	common SCSs = 3		>NP_000690.1 pancreatic alpha-amylase precursor	3
>NP_000821.1 glutamate receptor ionotropic, kainate 1 isoform 1 precursor [Homo sapiens]	common SCSs = 3		>NP_000821.1 glutamate receptor ionotropic, kainate 1 isoform 1 precursor	3
>NP_000822.2 glutamate receptor ionotropic, kainate 3 precursor [Homo sapiens]	common SCSs = 3		>NP_000822.2 glutamate receptor ionotropic, kainate 3 precursor	3
>NP_000824.1 glutamate receptor ionotropic, NMDA 2A isoform 1 precursor [Homo sapiens]	common SCSs = 3		>NP_000824.1 glutamate receptor ionotropic, NMDA 2A isoform 1 precursor	3
>NP_000911.2 pyruvate carboxylase, mitochondrial precursor [Homo sapiens]	common SCSs = 3		>NP_000911.2 pyruvate carboxylase, mitochondrial precursor	3
>NP_000923.1 1-phosphatidylinositol 4,5-bisphosphate phosphodiesterase beta-3 isoform 1 [Homo sapiens]	common SCSs = 3		>NP_000923.1 1-phosphatidylinositol 4,5-bisphosphate phosphodiesterase beta-3 isoform 1	3
>NP_000932.3 NADPH--cytochrome P450 reductase isoform 1 [Homo sapiens]	common SCSs = 3		>NP_000932.3 NADPH--cytochrome P450 reductase isoform 1	3
>NP_001001323.1 plasma membrane calcium-transporting ATPase 1 isoform 1a [Homo sapiens]	common SCSs = 3		>NP_001001323.1 plasma membrane calcium-transporting ATPase 1 isoform 1a	3
>NP_001001479.1 solute carrier family 35 member E4 isoform 1 [Homo sapiens]	common SCSs = 3		>NP_001001479.1 solute carrier family 35 member E4 isoform 1	3
>NP_001001794.3 protein DENND6B [Homo sapiens]	common SCSs = 3		>NP_001001794.3 protein DENND6B	3
>NP_001001922.2 olfactory receptor 52N5 [Homo sapiens]	common SCSs = 3		>NP_001001922.2 olfactory receptor 52N5	3
>NP_001002800.1 structural maintenance of chromosomes protein 4 isoform 1 [Homo sapiens]	common SCSs = 3		>NP_001002800.1 structural maintenance of chromosomes protein 4 isoform 1	3
>NP_001003681.1 HMG domain-containing protein 4 isoform 1 [Homo sapiens]	common SCSs = 3		>NP_001003681.1 HMG domain-containing protein 4 isoform 1	3
>NP_001006600.1 erbin isoform 7 [Homo sapiens]	common SCSs = 3		>NP_001006600.1 erbin isoform 7	3
>NP_001007258.1 PR domain zinc finger protein 2 isoform c [Homo sapiens]	common SCSs = 3		>NP_001007258.1 PR domain zinc finger protein 2 isoform c	3
>NP_001008.1 40S ribosomal protein S13 [Homo sapiens]	common SCSs = 3		>NP_001008.1 40S ribosomal protein S13	3
>NP_001008219.1 alpha-amylase 1 precursor [Homo sapiens]	common SCSs = 3		>NP_001008219.1 alpha-amylase 1 precursor	3
>NP_001008220.1 alpha-amylase 1 precursor [Homo sapiens]	common SCSs = 3		>NP_001008220.1 alpha-amylase 1 precursor	3
>NP_001008222.1 alpha-amylase 1 precursor [Homo sapiens]	common SCSs = 3		>NP_001008222.1 alpha-amylase 1 precursor	3
>NP_001008392.2 coiled-coil domain-containing protein 73 [Homo sapiens]	common SCSs = 3		>NP_001008392.2 coiled-coil domain-containing protein 73	3
>NP_001008844.1 desmoplakin isoform II [Homo sapiens]	common SCSs = 3		>NP_001008844.1 desmoplakin isoform II	3
>NP_001009944.3 polycystin-1 isoform 1 precursor [Homo sapiens]	common SCSs = 3		>NP_001009944.3 polycystin-1 isoform 1 precursor	3
>NP_001010854.1 tetratricopeptide repeat protein 7B isoform 1 [Homo sapiens]	common SCSs = 3		>NP_001010854.1 tetratricopeptide repeat protein 7B isoform 1	3
>NP_001010867.1 putative transferase CAF17, mitochondrial isoform 1 precursor [Homo sapiens]	common SCSs = 3		>NP_001010867.1 putative transferase CAF17, mitochondrial isoform 1 precursor	3
>NP_001010893.1 sodium/bile acid cotransporter 5 precursor [Homo sapiens]	common SCSs = 3		>NP_001010893.1 sodium/bile acid cotransporter 5 precursor	3
>NP_001010895.2 DNA excision repair protein ERCC-6-like 2 isoform c [Homo sapiens]	common SCSs = 3		>NP_001010895.2 DNA excision repair protein ERCC-6-like 2 isoform c	3
>NP_001017424.1 potassium channel subfamily K member 2 isoform a [Homo sapiens]	common SCSs = 3		>NP_001017424.1 potassium channel subfamily K member 2 isoform a	3
>NP_001017425.2 potassium channel subfamily K member 2 isoform c [Homo sapiens]	common SCSs = 3		>NP_001017425.2 potassium channel subfamily K member 2 isoform c	3
>NP_001017969.2 uncharacterized protein KIAA2026 [Homo sapiens]	common SCSs = 3		>NP_001017969.2 uncharacterized protein KIAA2026	3
>NP_001018054.1 mitogen-activated protein kinase kinase kinase 19 isoform 3 [Homo sapiens]	common SCSs = 3		>NP_001018054.1 mitogen-activated protein kinase kinase kinase 19 isoform 3	3
>NP_001018098.1 vacuolar protein sorting-associated protein 13C isoform 2B [Homo sapiens]	common SCSs = 3		>NP_001018098.1 vacuolar protein sorting-associated protein 13C isoform 2B	3
>NP_001019628.3 RANBP2-like and GRIP domain-containing protein 1 isoform 2 [Homo sapiens]	common SCSs = 3		>NP_001019628.3 RANBP2-like and GRIP domain-containing protein 1 isoform 2	3
>NP_001025169.1 sodium/bile acid cotransporter 7 isoform b [Homo sapiens]	common SCSs = 3		>NP_001025169.1 sodium/bile acid cotransporter 7 isoform b	3
>NP_001027005.1 phosphorylase b kinase regulatory subunit beta isoform b [Homo sapiens]	common SCSs = 3		>NP_001027005.1 phosphorylase b kinase regulatory subunit beta isoform b	3
>NP_001029097.1 nucleolysin TIAR isoform 2 [Homo sapiens]	common SCSs = 3		>NP_001029097.1 nucleolysin TIAR isoform 2	3
>NP_001030017.2 polypeptide N-acetylgalactosaminyltransferase-like 6 [Homo sapiens]	common SCSs = 3		>NP_001030017.2 polypeptide N-acetylgalactosaminyltransferase-like 6	3
>NP_001030127.2 sorbin and SH3 domain-containing protein 1 isoform 4 [Homo sapiens]	common SCSs = 3		>NP_001030127.2 sorbin and SH3 domain-containing protein 1 isoform 4	3
>NP_001030128.2 sorbin and SH3 domain-containing protein 1 isoform 5 [Homo sapiens]	common SCSs = 3		>NP_001030128.2 sorbin and SH3 domain-containing protein 1 isoform 5	3
>NP_001030129.2 sorbin and SH3 domain-containing protein 1 isoform 7 [Homo sapiens]	common SCSs = 3		>NP_001030129.2 sorbin and SH3 domain-containing protein 1 isoform 7	3
>NP_001034553.3 maestro heat-like repeat-containing protein family member 7 isoform 1 [Homo sapiens]	common SCSs = 3		>NP_001034553.3 maestro heat-like repeat-containing protein family member 7 isoform 1	3
>NP_001035743.1 zinc finger protein ZXDC isoform 2 [Homo sapiens]	common SCSs = 3		>NP_001035743.1 zinc finger protein ZXDC isoform 2	3
>NP_001035806.1 pyruvate carboxylase, mitochondrial precursor [Homo sapiens]	common SCSs = 3		>NP_001035806.1 pyruvate carboxylase, mitochondrial precursor	3
>NP_001035889.1 histone-lysine N-methyltransferase NSD2 isoform 1 [Homo sapiens]	common SCSs = 3		>NP_001035889.1 histone-lysine N-methyltransferase NSD2 isoform 1	3
>NP_001035998.1 ribosomal oxygenase 2 isoform a [Homo sapiens]	common SCSs = 3		>NP_001035998.1 ribosomal oxygenase 2 isoform a	3
>NP_001036055.2 transmembrane protein 8B isoform c [Homo sapiens]	common SCSs = 3		>NP_001036055.2 transmembrane protein 8B isoform c	3
>NP_001056.1 tumor necrosis factor receptor superfamily member 1A isoform 1 precursor [Homo sapiens]	common SCSs = 3		>NP_001056.1 tumor necrosis factor receptor superfamily member 1A isoform 1 precursor	3
>NP_001070649.1 dual specificity protein phosphatase CDC14B isoform 3 [Homo sapiens]	common SCSs = 3		>NP_001070649.1 dual specificity protein phosphatase CDC14B isoform 3	3
>NP_001071638.2 RANBP2-like and GRIP domain-containing protein 2 [Homo sapiens]	common SCSs = 3		>NP_001071638.2 RANBP2-like and GRIP domain-containing protein 2	3
>NP_001073280.1 protein diaphanous homolog 1 isoform 2 [Homo sapiens]	common SCSs = 3		>NP_001073280.1 protein diaphanous homolog 1 isoform 2	3
>NP_001073606.1 cancer/testis antigen 47A [Homo sapiens]	common SCSs = 3		>NP_001073606.1 cancer/testis antigen 47A	3
>NP_001073607.1 cancer/testis antigen 47A [Homo sapiens]	common SCSs = 3		>NP_001073607.1 cancer/testis antigen 47A	3
>NP_001073608.1 cancer/testis antigen 47A [Homo sapiens]	common SCSs = 3		>NP_001073608.1 cancer/testis antigen 47A	3
>NP_001073609.1 cancer/testis antigen 47A [Homo sapiens]	common SCSs = 3		>NP_001073609.1 cancer/testis antigen 47A	3
>NP_001073610.1 cancer/testis antigen 47A [Homo sapiens]	common SCSs = 3		>NP_001073610.1 cancer/testis antigen 47A	3
>NP_001073611.1 cancer/testis antigen 47A [Homo sapiens]	common SCSs = 3		>NP_001073611.1 cancer/testis antigen 47A	3
>NP_001073612.1 cancer/testis antigen 47A [Homo sapiens]	common SCSs = 3		>NP_001073612.1 cancer/testis antigen 47A	3
>NP_001073613.1 cancer/testis antigen 47A [Homo sapiens]	common SCSs = 3		>NP_001073613.1 cancer/testis antigen 47A	3
>NP_001073614.1 cancer/testis antigen 47A [Homo sapiens]	common SCSs = 3		>NP_001073614.1 cancer/testis antigen 47A	3
>NP_001073615.1 cancer/testis antigen 47A [Homo sapiens]	common SCSs = 3		>NP_001073615.1 cancer/testis antigen 47A	3
>NP_001073883.2 protein Daple [Homo sapiens]	common SCSs = 3		>NP_001073883.2 protein Daple	3
>NP_001073897.2 teneurin-2 isoform 2 [Homo sapiens]	common SCSs = 3		>NP_001073897.2 teneurin-2 isoform 2	3
>NP_001073898.1 calmodulin-regulated spectrin-associated protein 3 isoform 1 [Homo sapiens]	common SCSs = 3		>NP_001073898.1 calmodulin-regulated spectrin-associated protein 3 isoform 1	3
>NP_001073922.2 integrator complex subunit 1 [Homo sapiens]	common SCSs = 3		>NP_001073922.2 integrator complex subunit 1	3
>NP_001073964.2 trinucleotide repeat-containing gene 18 protein [Homo sapiens]	common SCSs = 3		>NP_001073964.2 trinucleotide repeat-containing gene 18 protein	3
>NP_001074003.1 protein unc-13 homolog C isoform 1 [Homo sapiens]	common SCSs = 3		>NP_001074003.1 protein unc-13 homolog C isoform 1	3
>NP_001075221.1 elastin isoform b precursor [Homo sapiens]	common SCSs = 3		>NP_001075221.1 elastin isoform b precursor	3
>NP_001075222.1 elastin isoform c precursor [Homo sapiens]	common SCSs = 3		>NP_001075222.1 elastin isoform c precursor	3
>NP_001075223.1 elastin isoform d precursor [Homo sapiens]	common SCSs = 3		>NP_001075223.1 elastin isoform d precursor	3
>NP_001075224.1 elastin isoform e precursor [Homo sapiens]	common SCSs = 3		>NP_001075224.1 elastin isoform e precursor	3
>NP_001077376.3 B-cell scaffold protein with ankyrin repeats isoform 2 [Homo sapiens]	common SCSs = 3		>NP_001077376.3 B-cell scaffold protein with ankyrin repeats isoform 2	3
>NP_001091645.1 ectonucleoside triphosphate diphosphohydrolase 1 isoform 2 [Homo sapiens]	common SCSs = 3		>NP_001091645.1 ectonucleoside triphosphate diphosphohydrolase 1 isoform 2	3
>NP_001091886.1 histone deacetylase 7 isoform d [Homo sapiens]	common SCSs = 3		>NP_001091886.1 histone deacetylase 7 isoform d	3
>NP_001092140.1 RAS guanyl-releasing protein 2 isoform a [Homo sapiens]	common SCSs = 3		>NP_001092140.1 RAS guanyl-releasing protein 2 isoform a	3
>NP_001092141.1 RAS guanyl-releasing protein 2 isoform a [Homo sapiens]	common SCSs = 3		>NP_001092141.1 RAS guanyl-releasing protein 2 isoform a	3
>NP_001093631.1 exportin-7 isoform a [Homo sapiens]	common SCSs = 3		>NP_001093631.1 exportin-7 isoform a	3
>NP_001093879.1 sentrin-specific protease 6 isoform 2 [Homo sapiens]	common SCSs = 3		>NP_001093879.1 sentrin-specific protease 6 isoform 2	3
>NP_001096080.1 gamma-tubulin complex component 5 isoform b [Homo sapiens]	common SCSs = 3		>NP_001096080.1 gamma-tubulin complex component 5 isoform b	3
>NP_001098714.1 receptor-type tyrosine-protein phosphatase mu isoform 1 precursor [Homo sapiens]	common SCSs = 3		>NP_001098714.1 receptor-type tyrosine-protein phosphatase mu isoform 1 precursor	3
>NP_001098721.2 zinc finger FYVE domain-containing protein 16 isoform a [Homo sapiens]	common SCSs = 3		>NP_001098721.2 zinc finger FYVE domain-containing protein 16 isoform a	3
>NP_001099008.1 myb-binding protein 1A isoform 1 [Homo sapiens]	common SCSs = 3		>NP_001099008.1 myb-binding protein 1A isoform 1	3
>NP_001104026.1 filamin-A isoform 2 [Homo sapiens]	common SCSs = 3		>NP_001104026.1 filamin-A isoform 2	3
>NP_001104489.1 neuron navigator 2 isoform 4 [Homo sapiens]	common SCSs = 3		>NP_001104489.1 neuron navigator 2 isoform 4	3
>NP_001104504.1 tartrate-resistant acid phosphatase type 5 precursor [Homo sapiens]	common SCSs = 3		>NP_001104504.1 tartrate-resistant acid phosphatase type 5 precursor	3
>NP_001104505.1 tartrate-resistant acid phosphatase type 5 precursor [Homo sapiens]	common SCSs = 3		>NP_001104505.1 tartrate-resistant acid phosphatase type 5 precursor	3
>NP_001104506.1 tartrate-resistant acid phosphatase type 5 precursor [Homo sapiens]	common SCSs = 3		>NP_001104506.1 tartrate-resistant acid phosphatase type 5 precursor	3
>NP_001106197.1 centrosomal protein of 170 kDa protein B isoform 1 [Homo sapiens]	common SCSs = 3		>NP_001106197.1 centrosomal protein of 170 kDa protein B isoform 1	3
>NP_001106207.1 protein TASOR isoform a [Homo sapiens]	common SCSs = 3		>NP_001106207.1 protein TASOR isoform a	3
>NP_001106710.1 homeodomain-interacting protein kinase 2 isoform 2 [Homo sapiens]	common SCSs = 3		>NP_001106710.1 homeodomain-interacting protein kinase 2 isoform 2	3
>NP_001116151.1 teneurin-2 isoform 1 [Homo sapiens]	common SCSs = 3		>NP_001116151.1 teneurin-2 isoform 1	3
>NP_001116293.1 protein SET isoform 1 [Homo sapiens]	common SCSs = 3		>NP_001116293.1 protein SET isoform 1	3
>NP_001116310.1 N-acyl-phosphatidylethanolamine-hydrolyzing phospholipase D isoform 1 [Homo sapiens]	common SCSs = 3		>NP_001116310.1 N-acyl-phosphatidylethanolamine-hydrolyzing phospholipase D isoform 1	3
>NP_001116855.1 BCL-6 corepressor isoform a [Homo sapiens]	common SCSs = 3		>NP_001116855.1 BCL-6 corepressor isoform a	3
>NP_001116856.1 BCL-6 corepressor isoform b [Homo sapiens]	common SCSs = 3		>NP_001116856.1 BCL-6 corepressor isoform b	3
>NP_001116857.1 BCL-6 corepressor isoform c [Homo sapiens]	common SCSs = 3		>NP_001116857.1 BCL-6 corepressor isoform c	3
>NP_001119603.1 DNA polymerase subunit gamma-1 [Homo sapiens]	common SCSs = 3		>NP_001119603.1 DNA polymerase subunit gamma-1	3
>NP_001120654.2 centrosomal protein of 55 kDa [Homo sapiens]	common SCSs = 3		>NP_001120654.2 centrosomal protein of 55 kDa	3
>NP_001121699.1 bifunctional UDP-N-acetylglucosamine 2-epimerase/N-acetylmannosamine kinase isoform 1 [Homo sapiens]	common SCSs = 3		>NP_001121699.1 bifunctional UDP-N-acetylglucosamine 2-epimerase/N-acetylmannosamine kinase isoform 1	3
>NP_001123199.1 puratrophin-1 isoform 1 [Homo sapiens]	common SCSs = 3		>NP_001123199.1 puratrophin-1 isoform 1	3
>NP_001123200.1 puratrophin-1 isoform 1 [Homo sapiens]	common SCSs = 3		>NP_001123200.1 puratrophin-1 isoform 1	3
>NP_001123201.1 puratrophin-1 isoform 1 [Homo sapiens]	common SCSs = 3		>NP_001123201.1 puratrophin-1 isoform 1	3
>NP_001123362.1 leucine-rich repeat-containing protein 69 isoform 1 [Homo sapiens]	common SCSs = 3		>NP_001123362.1 leucine-rich repeat-containing protein 69 isoform 1	3
>NP_001123380.2 Golgi-associated kinase 1A precursor [Homo sapiens]	common SCSs = 3		>NP_001123380.2 Golgi-associated kinase 1A precursor	3
>NP_001123616.1 latent-transforming growth factor beta-binding protein 3 isoform 1 precursor [Homo sapiens]	common SCSs = 3		>NP_001123616.1 latent-transforming growth factor beta-binding protein 3 isoform 1 precursor	3
>NP_001123927.1 dysferlin isoform 2 [Homo sapiens]	common SCSs = 3		>NP_001123927.1 dysferlin isoform 2	3
>NP_001124318.2 apoptosis-inducing factor 1, mitochondrial isoform AIFsh [Homo sapiens]	common SCSs = 3		>NP_001124318.2 apoptosis-inducing factor 1, mitochondrial isoform AIFsh	3
>NP_001124448.1 dysferlin isoform 9 [Homo sapiens]	common SCSs = 3		>NP_001124448.1 dysferlin isoform 9	3
>NP_001124449.1 dysferlin isoform 10 [Homo sapiens]	common SCSs = 3		>NP_001124449.1 dysferlin isoform 10	3
>NP_001124450.1 dysferlin isoform 11 [Homo sapiens]	common SCSs = 3		>NP_001124450.1 dysferlin isoform 11	3
>NP_001124451.1 dysferlin isoform 12 [Homo sapiens]	common SCSs = 3		>NP_001124451.1 dysferlin isoform 12	3
>NP_001124452.1 dysferlin isoform 13 [Homo sapiens]	common SCSs = 3		>NP_001124452.1 dysferlin isoform 13	3
>NP_001124453.1 dysferlin isoform 14 [Homo sapiens]	common SCSs = 3		>NP_001124453.1 dysferlin isoform 14	3
>NP_001124454.1 dysferlin isoform 7 [Homo sapiens]	common SCSs = 3		>NP_001124454.1 dysferlin isoform 7	3
>NP_001124455.1 dysferlin isoform 6 [Homo sapiens]	common SCSs = 3		>NP_001124455.1 dysferlin isoform 6	3
>NP_001124456.1 dysferlin isoform 5 [Homo sapiens]	common SCSs = 3		>NP_001124456.1 dysferlin isoform 5	3
>NP_001124457.1 dysferlin isoform 4 [Homo sapiens]	common SCSs = 3		>NP_001124457.1 dysferlin isoform 4	3
>NP_001124458.1 dysferlin isoform 3 [Homo sapiens]	common SCSs = 3		>NP_001124458.1 dysferlin isoform 3	3
>NP_001124459.1 dysferlin isoform 1 [Homo sapiens]	common SCSs = 3		>NP_001124459.1 dysferlin isoform 1	3
>NP_001127879.1 glutamate receptor ionotropic, NMDA 2A isoform 1 precursor [Homo sapiens]	common SCSs = 3		>NP_001127879.1 glutamate receptor ionotropic, NMDA 2A isoform 1 precursor	3
>NP_001127880.1 glutamate receptor ionotropic, NMDA 2A isoform 2 precursor [Homo sapiens]	common SCSs = 3		>NP_001127880.1 glutamate receptor ionotropic, NMDA 2A isoform 2 precursor	3
>NP_001127945.1 genetic suppressor element 1 isoform 2 [Homo sapiens]	common SCSs = 3		>NP_001127945.1 genetic suppressor element 1 isoform 2	3
>NP_001128567.1 fibronectin type III domain-containing protein 3B [Homo sapiens]	common SCSs = 3		>NP_001128567.1 fibronectin type III domain-containing protein 3B	3
>NP_001128662.1 arf-GAP with Rho-GAP domain, ANK repeat and PH domain-containing protein 1 isoform d [Homo sapiens]	common SCSs = 3		>NP_001128662.1 arf-GAP with Rho-GAP domain, ANK repeat and PH domain-containing protein 1 isoform d	3
>NP_001129070.1 clathrin heavy chain linker domain-containing protein 1 isoform 2 [Homo sapiens]	common SCSs = 3		>NP_001129070.1 clathrin heavy chain linker domain-containing protein 1 isoform 2	3
>NP_001129396.1 von Willebrand factor D and EGF domain-containing protein isoform 1 precursor [Homo sapiens]	common SCSs = 3		>NP_001129396.1 von Willebrand factor D and EGF domain-containing protein isoform 1 precursor	3
>NP_001131.3 polyunsaturated fatty acid lipoxygenase ALOX15 [Homo sapiens]	common SCSs = 3		>NP_001131.3 polyunsaturated fatty acid lipoxygenase ALOX15	3
>NP_001135918.1 ankyrin-1 isoform 9 [Homo sapiens]	common SCSs = 3		>NP_001135918.1 ankyrin-1 isoform 9	3
>NP_001137357.1 protein phosphatase 1 regulatory subunit 12A isoform a [Homo sapiens]	common SCSs = 3		>NP_001137357.1 protein phosphatase 1 regulatory subunit 12A isoform a	3
>NP_001137358.1 protein phosphatase 1 regulatory subunit 12A isoform b [Homo sapiens]	common SCSs = 3		>NP_001137358.1 protein phosphatase 1 regulatory subunit 12A isoform b	3
>NP_001137434.1 calpain-8 [Homo sapiens]	common SCSs = 3		>NP_001137434.1 calpain-8	3
>NP_001137474.1 CTP synthase 2 [Homo sapiens]	common SCSs = 3		>NP_001137474.1 CTP synthase 2	3
>NP_001138241.1 dystonin isoform 2 [Homo sapiens]	common SCSs = 3		>NP_001138241.1 dystonin isoform 2	3
>NP_001138648.1 protein shisa-7 precursor [Homo sapiens]	common SCSs = 3		>NP_001138648.1 protein shisa-7 precursor	3
>NP_001138775.2 transmembrane channel-like protein 4 isoform 1 [Homo sapiens]	common SCSs = 3		>NP_001138775.2 transmembrane channel-like protein 4 isoform 1	3
>NP_001138947.1 protein FAM186A [Homo sapiens]	common SCSs = 3		>NP_001138947.1 protein FAM186A	3
>NP_001153059.1 CD109 antigen isoform 2 preproprotein [Homo sapiens]	common SCSs = 3		>NP_001153059.1 CD109 antigen isoform 2 preproprotein	3
>NP_001153060.1 CD109 antigen isoform 3 preproprotein [Homo sapiens]	common SCSs = 3		>NP_001153060.1 CD109 antigen isoform 3 preproprotein	3
>NP_001153581.1 nitric oxide synthase, endothelial isoform 2 [Homo sapiens]	common SCSs = 3		>NP_001153581.1 nitric oxide synthase, endothelial isoform 2	3
>NP_001156750.1 teneurin-1 isoform 1 precursor [Homo sapiens]	common SCSs = 3		>NP_001156750.1 teneurin-1 isoform 1 precursor	3
>NP_001156751.1 teneurin-1 isoform 2 precursor [Homo sapiens]	common SCSs = 3		>NP_001156751.1 teneurin-1 isoform 2 precursor	3
>NP_001157101.1 maestro heat-like repeat-containing protein family member 9 isoform 1 [Homo sapiens]	common SCSs = 3		>NP_001157101.1 maestro heat-like repeat-containing protein family member 9 isoform 1	3
>NP_001157569.1 versican core protein isoform 3 precursor [Homo sapiens]	common SCSs = 3		>NP_001157569.1 versican core protein isoform 3 precursor	3
>NP_001157650.1 ectonucleoside triphosphate diphosphohydrolase 1 isoform 3 [Homo sapiens]	common SCSs = 3		>NP_001157650.1 ectonucleoside triphosphate diphosphohydrolase 1 isoform 3	3
>NP_001157653.1 ectonucleoside triphosphate diphosphohydrolase 1 isoform 5 [Homo sapiens]	common SCSs = 3		>NP_001157653.1 ectonucleoside triphosphate diphosphohydrolase 1 isoform 5	3
>NP_001157654.1 ectonucleoside triphosphate diphosphohydrolase 1 isoform 6 [Homo sapiens]	common SCSs = 3		>NP_001157654.1 ectonucleoside triphosphate diphosphohydrolase 1 isoform 6	3
>NP_001157655.1 ectonucleoside triphosphate diphosphohydrolase 1 isoform 6 [Homo sapiens]	common SCSs = 3		>NP_001157655.1 ectonucleoside triphosphate diphosphohydrolase 1 isoform 6	3
>NP_001157915.1 ankyrin repeat domain-containing protein 31 isoform 2 [Homo sapiens]	common SCSs = 3		>NP_001157915.1 ankyrin repeat domain-containing protein 31 isoform 2	3
>NP_001157934.1 mucin-12 precursor [Homo sapiens]	common SCSs = 3		>NP_001157934.1 mucin-12 precursor	3
>NP_001158058.1 immunoglobulin-like and fibronectin type III domain-containing protein 1 isoform 1 [Homo sapiens]	common SCSs = 3		>NP_001158058.1 immunoglobulin-like and fibronectin type III domain-containing protein 1 isoform 1	3
>NP_001159451.1 1-phosphatidylinositol 4,5-bisphosphate phosphodiesterase epsilon-1 isoform 2 [Homo sapiens]	common SCSs = 3		>NP_001159451.1 1-phosphatidylinositol 4,5-bisphosphate phosphodiesterase epsilon-1 isoform 2	3
>NP_001159521.1 DNA excision repair protein ERCC-1 isoform 3 [Homo sapiens]	common SCSs = 3		>NP_001159521.1 DNA excision repair protein ERCC-1 isoform 3	3
>NP_001159605.1 extracellular matrix protein FRAS1 isoform 2 precursor [Homo sapiens]	common SCSs = 3		>NP_001159605.1 extracellular matrix protein FRAS1 isoform 2 precursor	3
>NP_001159694.1 carnosine synthase 1 isoform 1 [Homo sapiens]	common SCSs = 3		>NP_001159694.1 carnosine synthase 1 isoform 1	3
>NP_001161206.1 valine--tRNA ligase, mitochondrial isoform 1 [Homo sapiens]	common SCSs = 3		>NP_001161206.1 valine--tRNA ligase, mitochondrial isoform 1	3
>NP_001161833.1 protocadherin-11 X-linked isoform f precursor [Homo sapiens]	common SCSs = 3		>NP_001161833.1 protocadherin-11 X-linked isoform f precursor	3
[truncated: 36,884 more rows]

## Sheet: Sheet3
タンパク質名のみ	タンパク質名（重複なし）	isoform数
titin	titin	19
titin	mucin-16	14
titin	adhesion G-protein coupled receptor V1	13
titin	ryanodine receptor 3	15
titin	nesprin-1	36
titin	protein unc-80 homolog	21
titin	transmembrane protein KIAA1109	20
titin	thyroid adenoma-associated protein	16
titin	unconventional myosin-XVI	3
titin	cytoplasmic dynein 1 heavy chain 1	1
titin	inositol 1,4,5-trisphosphate receptor type 2	4
titin	histone-lysine N-methyltransferase 2C	28
titin	mucin-19	1
titin	ryanodine receptor 1	5
titin	ryanodine receptor 2	10
titin	KAT8 regulatory NSL complex subunit 1	12
titin	protocadherin Fat 4	4
titin	basement membrane-specific heparan sulfate proteoglycan core protein	6
mucin-16	unconventional myosin-XVIIIa	6
mucin-16	huntingtin	1
mucin-16	probable ubiquitin carboxyl-terminal hydrolase FAF-Y	2
mucin-16	helicase SRCAP	1
mucin-16	zinc finger homeobox protein 3	5
mucin-16	nesprin-2	19
mucin-16	retroelement silencing factor 1	5
mucin-16	E3 ubiquitin-protein ligase HUWE1	20
mucin-16	fibrous sheath-interacting protein 2	2
mucin-16	NLR family CARD domain-containing protein 3	13
mucin-16	E3 ubiquitin-protein ligase UBR4	24
mucin-16	neurofibromin	3
mucin-16	apolipoprotein B-100	1
adhesion G-protein coupled receptor V1	amiloride-sensitive sodium channel subunit alpha	3
adhesion G-protein coupled receptor V1	nck-associated protein 5-like	5
adhesion G-protein coupled receptor V1	arf-GAP with Rho-GAP domain, ANK repeat and PH domain-containing protein 1	4
adhesion G-protein coupled receptor V1	homeodomain-interacting protein kinase 3	6
adhesion G-protein coupled receptor V1	histone-lysine N-methyltransferase SETD5	33
adhesion G-protein coupled receptor V1	obscurin	4
adhesion G-protein coupled receptor V1	teneurin-4	4
adhesion G-protein coupled receptor V1	TP53-binding protein 1	6
ryanodine receptor 3	coiled-coil domain-containing protein 168	2
ryanodine receptor 3	rho GTPase-activating protein 7	9
ryanodine receptor 3	dyslexia-associated protein KIAA0319	21
adhesion G-protein coupled receptor V1	telomere-associated protein RIF1	11
adhesion G-protein coupled receptor V1	histone-lysine N-methyltransferase 2A	7
nesprin-1	transformation/transcription domain-associated protein	3
nesprin-1	neural cell adhesion molecule L1-like protein	18
ryanodine receptor 3	sodium bicarbonate cotransporter 3	21
ryanodine receptor 3	multiple PDZ domain protein	26
ryanodine receptor 3	otogelin	2
ryanodine receptor 3	protein MON2 homolog	11
ryanodine receptor 3	FH1/FH2 domain-containing protein 3	19
ryanodine receptor 3	DNA polymerase zeta catalytic subunit	14
ryanodine receptor 3	putative maltase-glucoamylase-like protein FLJ16351	5
ryanodine receptor 3	pecanex-like protein 1	13
ryanodine receptor 3	protein mono-ADP-ribosyltransferase PARP10	3
ryanodine receptor 3	envoplakin	2
ryanodine receptor 3	protein NPAT	5
ryanodine receptor 3	protein TANC1	32
protein unc-80 homolog	nuclear pore complex protein Nup98-Nup96	7
transmembrane protein KIAA1109	zinc finger protein 469	2
transmembrane protein KIAA1109	baculoviral IAP repeat-containing protein 6	18
protein unc-80 homolog	sorbin and SH3 domain-containing protein 1	77
nesprin-1	histone-lysine N-methyltransferase 2D	9
protein unc-80 homolog	desmoplakin	3
nesprin-1	reelin	2
protein unc-80 homolog	golgin subfamily A member 3	13
transmembrane protein KIAA1109	mucin-3A	1
transmembrane protein KIAA1109	protein piccolo	4
transmembrane protein KIAA1109	protein PRRC2C	18
nesprin-1	structural maintenance of chromosomes flexible hinge domain-containing protein 1	4
nesprin-1	acrosomal protein KIAA1210	5
nesprin-1	WD repeat- and FYVE domain-containing protein 4	12
nesprin-1	extracellular matrix protein FRAS1	2
nesprin-1	VPS10 domain-containing receptor SorCS1	13
nesprin-1	fibrocystin	21
nesprin-1	ATP-binding cassette sub-family A member 13	22
nesprin-1	dynein heavy chain 17, axonemal	5
nesprin-1	usherin	2
nesprin-1	FRAS1-related extracellular matrix protein 2	2
nesprin-1	MAX gene-associated protein	23
nesprin-1	E3 ubiquitin-protein ligase MYCBP2	30
nesprin-1	protein phosphatase 1 regulatory subunit 12B	16
nesprin-1	WASH complex subunit 4	6
nesprin-1	N(4)-(beta-N-acetylglucosaminyl)-L-asparaginase	2
nesprin-1	Hermansky-Pudlak syndrome 1 protein	21
nesprin-1	laminin subunit alpha-2	8
protein unc-80 homolog	glutamate receptor 2	5
protein unc-80 homolog	glutamate receptor 1	11
protein unc-80 homolog	glutamate receptor 3	2
protein unc-80 homolog	glutamate receptor 4	14
protein unc-80 homolog	interleukin-7	7
transmembrane protein KIAA1109	serine/threonine-protein kinase WNK3	9
transmembrane protein KIAA1109	fibroblast growth factor receptor-like 1	6
transmembrane protein KIAA1109	uromodulin-like 1	7
transmembrane protein KIAA1109	chromodomain-helicase-DNA-binding protein 3	20
transmembrane protein KIAA1109	WASH complex subunit 2A	21
transmembrane protein KIAA1109	protocadherin Fat 3	10
transmembrane protein KIAA1109	DNA excision repair protein ERCC-6-like	2
transmembrane protein KIAA1109	Fanconi anemia group D2 protein	5
transmembrane protein KIAA1109	neuron navigator 3	18
nesprin-1	AT-hook DNA-binding motif-containing protein 1	11
nesprin-1	helicase with zinc finger domain 2	4
nesprin-1	solute carrier family 2, facilitated glucose transporter member 4	1
nesprin-1	solute carrier family 26 member 6	6
nesprin-1	nuclear receptor corepressor 2	3
protein unc-80 homolog	cubilin	5
protein unc-80 homolog	RB1-inducible coiled-coil protein 1	18
protein unc-80 homolog	coatomer subunit alpha	2
protein unc-80 homolog	roquin-2	5
protein unc-80 homolog	maestro heat-like repeat-containing protein family member 6	12
protein unc-80 homolog	laminin subunit alpha-4	6
protein unc-80 homolog	neuron navigator 2	30
transmembrane protein KIAA1109	coiled-coil domain-containing protein 17	14
transmembrane protein KIAA1109	laminin subunit alpha-3	11
transmembrane protein KIAA1109	lipase member M	5
nesprin-1	inositol hexakisphosphate and diphosphoinositol-pentakisphosphate kinase 1	43
nesprin-1	protein eyes shut homolog	2
nesprin-1	SLIT and NTRK-like protein 2	12
nesprin-1	NHS-like protein 1	18
nesprin-1	protein sidekick-2	4
nesprin-1	uncharacterized protein KIAA1671	4
nesprin-1	histone-lysine N-methyltransferase SETDB1	4
nesprin-1	otoancorin	5
nesprin-1	nebulin	40
nesprin-1	glutamate receptor ionotropic, kainate 2	8
transmembrane protein KIAA1109	protein strawberry notch homolog 1	2
thyroid adenoma-associated protein	protocadherin-11 X-linked	20
unconventional myosin-XVI	chromodomain-helicase-DNA-binding protein 8	2
thyroid adenoma-associated protein	nuclear receptor corepressor 1	46
thyroid adenoma-associated protein	BIVM-ERCC5 protein	1
cytoplasmic dynein 1 heavy chain 1	disheveled-associated activator of morphogenesis 1	4
inositol 1,4,5-trisphosphate receptor type 2	hydrocephalus-inducing protein homolog	14
unconventional myosin-XVI	slit homolog 3 protein	3
thyroid adenoma-associated protein	dynein heavy chain 11, axonemal	1
histone-lysine N-methyltransferase 2C	SKI family transcriptional corepressor 2	1
mucin-19	elastin	27
histone-lysine N-methyltransferase 2C	signal-induced proliferation-associated 1-like protein 1	33
histone-lysine N-methyltransferase 2C	anillin	8
histone-lysine N-methyltransferase 2C	centrosomal protein of 162 kDa	8
histone-lysine N-methyltransferase 2C	general transcription factor 3C polypeptide 1	3
histone-lysine N-methyltransferase 2C	protein FAM214A	14
thyroid adenoma-associated protein	anaphase-promoting complex subunit 4	6
thyroid adenoma-associated protein	1-phosphatidylinositol 4,5-bisphosphate phosphodiesterase epsilon-1	14
thyroid adenoma-associated protein	filamin-A-interacting protein 1	6
histone-lysine N-methyltransferase 2C	dedicator of cytokinesis protein 10	11
histone-lysine N-methyltransferase 2C	catenin alpha-1	37
histone-lysine N-methyltransferase 2C	dmX-like protein 1	18
histone-lysine N-methyltransferase 2C	hemicentin-2	9
histone-lysine N-methyltransferase 2C	mitogen-activated protein kinase kinase kinase 6	4
histone-lysine N-methyltransferase 2C	transcription factor-like 5 protein	10
histone-lysine N-methyltransferase 2C	solute carrier family 22 member 5	4
histone-lysine N-methyltransferase 2C	matrilin-2	6
histone-lysine N-methyltransferase 2C	nuclear receptor coactivator 6	20
unconventional myosin-XVI	unconventional myosin-XVIIIb	15
thyroid adenoma-associated protein	A disintegrin and metalloproteinase with thrombospondin motifs 9	2
protein unc-80 homolog	neuronal PAS domain-containing protein 4	4
adhesion G-protein coupled receptor V1	palmitoyltransferase ZDHHC23	12
adhesion G-protein coupled receptor V1	thyroid receptor-interacting protein 11	4
histone-lysine N-methyltransferase 2C	pleckstrin homology domain-containing family A member 7	20
histone-lysine N-methyltransferase 2C	WASH complex subunit 2C	36
histone-lysine N-methyltransferase 2C	RNA polymerase-associated protein CTR9 homolog	2
histone-lysine N-methyltransferase 2C	baculoviral IAP repeat-containing protein 1	3
histone-lysine N-methyltransferase 2C	protein AHNAK2	3
histone-lysine N-methyltransferase 2C	pleckstrin homology domain-containing family G member 2	8
histone-lysine N-methyltransferase 2C	putative short-chain dehydrogenase/reductase family 42E member 2	7
histone-lysine N-methyltransferase 2C	histone-lysine N-methyltransferase, H3 lysine-36 specific	16
histone-lysine N-methyltransferase 2C	maltase-glucoamylase, intestinal	9
inositol 1,4,5-trisphosphate receptor type 2	dynein heavy chain 12, axonemal	8
inositol 1,4,5-trisphosphate receptor type 2	doublecortin domain-containing protein 1	14
histone-lysine N-methyltransferase 2C	receptor-type tyrosine-protein phosphatase zeta	5
histone-lysine N-methyltransferase 2C	homeodomain-interacting protein kinase 1	12
ryanodine receptor 1	protein unc-13 homolog B	10
ryanodine receptor 2	dynein heavy chain 6, axonemal	14
ryanodine receptor 1	dystonin	41
KAT8 regulatory NSL complex subunit 1	ATP-binding cassette sub-family A member 10	2
KAT8 regulatory NSL complex subunit 1	neurobeachin	14
protocadherin Fat 4	glutamyl aminopeptidase	5
protocadherin Fat 4	dipeptidyl peptidase 9	34
basement membrane-specific heparan sulfate proteoglycan core protein	ciliogenesis and planar polarity effector 1	23
unconventional myosin-XVIIIa	microtubule-associated protein 4	147
unconventional myosin-XVIIIa	DNA damage-binding protein 1	1
unconventional myosin-XVIIIa	laminin subunit beta-2	2
KAT8 regulatory NSL complex subunit 1	mucin-2	1
huntingtin	nuclear receptor-interacting protein 1	12
probable ubiquitin carboxyl-terminal hydrolase FAF-Y	ras GTPase-activating-like protein IQGAP1	1
basement membrane-specific heparan sulfate proteoglycan core protein	myomesin-2	2
helicase SRCAP	versican core protein	4
zinc finger homeobox protein 3	low-density lipoprotein receptor-related protein 2	3
nesprin-2	disks large homolog 5	14
KAT8 regulatory NSL complex subunit 1	symplekin	3
retroelement silencing factor 1	protocadherin Fat 1	4
protocadherin Fat 4	nucleolin	1
E3 ubiquitin-protein ligase HUWE1	laminin subunit gamma-2	3
unconventional myosin-XVIIIa	bone morphogenetic protein 1	2
fibrous sheath-interacting protein 2	talin-1	1
NLR family CARD domain-containing protein 3	splicing factor 3B subunit 1	1
nesprin-2	sodium-dependent proline transporter	6
unconventional myosin-XVIIIa	midasin	6
retroelement silencing factor 1	pecanex-like protein 2	5
zinc finger homeobox protein 3	serine/threonine-protein kinase SMG1	10
E3 ubiquitin-protein ligase HUWE1	little elongation complex subunit 1	3
nesprin-2	E3 ubiquitin-protein ligase HECTD1	12
nesprin-2	RNA polymerase II-associated protein 1	2
nesprin-2	BRD4-interacting chromatin-remodeling complex-associated protein	5
nesprin-2	homeobox protein SIX4	2
nesprin-2	stabilin-2	7
ryanodine receptor 2	PH-interacting protein	5
ryanodine receptor 2	4'-phosphopantetheine phosphatase	1
ryanodine receptor 2	manganese-transporting ATPase 13A1	1
ryanodine receptor 2	reticulon-4	11
ryanodine receptor 2	caskin-1	2
ryanodine receptor 2	carbohydrate sulfotransferase 6	3
ryanodine receptor 2	anaphase-promoting complex subunit 1	9
thyroid adenoma-associated protein	transport and Golgi organization protein 6 homolog	2
thyroid adenoma-associated protein	multimerin-2	3
KAT8 regulatory NSL complex subunit 1	phosphatidylinositol 3,4,5-trisphosphate-dependent Rac exchanger 2 protein	3
ryanodine receptor 1	dedicator of cytokinesis protein 5	1
ryanodine receptor 1	A disintegrin and metalloproteinase with thrombospondin motifs 20	3
protein unc-80 homolog	ubiquitin carboxyl-terminal hydrolase 32	11
retroelement silencing factor 1	hepatitis A virus cellular receptor 2	1
KAT8 regulatory NSL complex subunit 1	protocadherin-11 Y-linked	9
KAT8 regulatory NSL complex subunit 1	protein dispatched homolog 2	3
KAT8 regulatory NSL complex subunit 1	coiled-coil domain-containing protein 97	3
ryanodine receptor 1	kinetochore scaffold 1	3
E3 ubiquitin-protein ligase HUWE1	xin actin-binding repeat-containing protein 2	5
E3 ubiquitin-protein ligase HUWE1	coiled-coil domain-containing protein 27	7
nesprin-2	kinesin-like protein KIF19	12
nesprin-2	very large A-kinase anchor protein	2
nesprin-2	fibrocystin-L	8
nesprin-2	stAR-related lipid transfer protein 13	10
nesprin-2	PDZ domain-containing protein 2	12
nesprin-2	protein FAM83H	1
nesprin-2	genetic suppressor element 1	13
nesprin-2	girdin	16
nesprin-2	protein FAM186B	7
E3 ubiquitin-protein ligase UBR4	uncharacterized protein C1orf105	11
E3 ubiquitin-protein ligase UBR4	IQ motif and SEC7 domain-containing protein 3	8
E3 ubiquitin-protein ligase UBR4	la-related protein 1B	34
E3 ubiquitin-protein ligase UBR4	M-phase phosphoprotein 8	2
E3 ubiquitin-protein ligase UBR4	enoyl-[acyl-carrier-protein] reductase, mitochondrial	31
E3 ubiquitin-protein ligase UBR4	receptor tyrosine-protein kinase erbB-4	11
E3 ubiquitin-protein ligase UBR4	proline rich transmembrane protein 1B	3
E3 ubiquitin-protein ligase UBR4	phosphatidylinositol phosphatase PTPRQ	4
E3 ubiquitin-protein ligase UBR4	protein enabled homolog	27
E3 ubiquitin-protein ligase UBR4	dynein heavy chain 2, axonemal	13
basement membrane-specific heparan sulfate proteoglycan core protein	calcium/calmodulin-dependent protein kinase kinase 1	13
E3 ubiquitin-protein ligase UBR4	alpha-2-macroglobulin	5
E3 ubiquitin-protein ligase UBR4	ankyrin-1	29
basement membrane-specific heparan sulfate proteoglycan core protein	copper-transporting ATPase 1	2
basement membrane-specific heparan sulfate proteoglycan core protein	breast cancer type 2 susceptibility protein	1
basement membrane-specific heparan sulfate proteoglycan core protein	lysosomal-trafficking regulator	12
ryanodine receptor 2	collagen alpha-1(VII) chain	6
protein unc-80 homolog	fibrillin-1	1
protein unc-80 homolog	gap junction alpha-1 protein	1
adhesion G-protein coupled receptor V1	glycine dehydrogenase (decarboxylating), mitochondrial	1
histone-lysine N-methyltransferase 2C	keratin, type I cytoskeletal 18	2
histone-lysine N-methyltransferase 2C	peroxisome assembly protein 12	1
retroelement silencing factor 1	phosphorylase b kinase regulatory subunit beta	3
nesprin-2	polycystin-1	10
nesprin-2	eosinophil peroxidase	1
NLR family CARD domain-containing protein 3	nitric oxide synthase, endothelial	4
NLR family CARD domain-containing protein 3	retinal dehydrogenase 1	1
NLR family CARD domain-containing protein 3	pancreatic alpha-amylase	1
NLR family CARD domain-containing protein 3	glutamate receptor ionotropic, kainate 1	8
NLR family CARD domain-containing protein 3	glutamate receptor ionotropic, kainate 3	1
NLR family CARD domain-containing protein 3	glutamate receptor ionotropic, NMDA 2A	7
NLR family CARD domain-containing protein 3	pyruvate carboxylase, mitochondrial	12
NLR family CARD domain-containing protein 3	1-phosphatidylinositol 4,5-bisphosphate phosphodiesterase beta-3	5
NLR family CARD domain-containing protein 3	NADPH--cytochrome P450 reductase	7
KAT8 regulatory NSL complex subunit 1	plasma membrane calcium-transporting ATPase 1	18
E3 ubiquitin-protein ligase HUWE1	solute carrier family 35 member E4	3
E3 ubiquitin-protein ligase HUWE1	protein DENND6B	11
E3 ubiquitin-protein ligase HUWE1	olfactory receptor 52N5	2
E3 ubiquitin-protein ligase HUWE1	structural maintenance of chromosomes protein 4	7
E3 ubiquitin-protein ligase HUWE1	HMG domain-containing protein 4	4
E3 ubiquitin-protein ligase HUWE1	erbin	12
E3 ubiquitin-protein ligase HUWE1	PR domain zinc finger protein 2	11
E3 ubiquitin-protein ligase HUWE1	40S ribosomal protein S13	1
E3 ubiquitin-protein ligase HUWE1	alpha-amylase 1	7
E3 ubiquitin-protein ligase HUWE1	coiled-coil domain-containing protein 73	1
E3 ubiquitin-protein ligase HUWE1	tetratricopeptide repeat protein 7B	3
E3 ubiquitin-protein ligase HUWE1	putative transferase CAF17, mitochondrial	2
E3 ubiquitin-protein ligase HUWE1	sodium/bile acid cotransporter 5	1
E3 ubiquitin-protein ligase HUWE1	DNA excision repair protein ERCC-6-like 2	9
probable ubiquitin carboxyl-terminal hydrolase FAF-Y	potassium channel subfamily K member 2	8
E3 ubiquitin-protein ligase HUWE1	uncharacterized protein KIAA2026	10
neurofibromin	mitogen-activated protein kinase kinase kinase 19	13
apolipoprotein B-100	vacuolar protein sorting-associated protein 13C	6
amiloride-sensitive sodium channel subunit alpha	RANBP2-like and GRIP domain-containing protein 1	11
nck-associated protein 5-like	sodium/bile acid cotransporter 7	7
arf-GAP with Rho-GAP domain, ANK repeat and PH domain-containing protein 1	nucleolysin TIAR	9
neurofibromin	polypeptide N-acetylgalactosaminyltransferase-like 6	8
homeodomain-interacting protein kinase 3	maestro heat-like repeat-containing protein family member 7	2
histone-lysine N-methyltransferase SETD5	zinc finger protein ZXDC	5
obscurin	histone-lysine N-methyltransferase NSD2	11
teneurin-4	ribosomal oxygenase 2	6
TP53-binding protein 1	transmembrane protein 8B	3
TP53-binding protein 1	tumor necrosis factor receptor superfamily member 1A	3
coiled-coil domain-containing protein 168	dual specificity protein phosphatase CDC14B	23
amiloride-sensitive sodium channel subunit alpha	RANBP2-like and GRIP domain-containing protein 2	7
amiloride-sensitive sodium channel subunit alpha	protein diaphanous homolog 1	7
rho GTPase-activating protein 7	cancer/testis antigen 47A	25
dyslexia-associated protein KIAA0319	protein Daple	3
dyslexia-associated protein KIAA0319	teneurin-2	16
dyslexia-associated protein KIAA0319	calmodulin-regulated spectrin-associated protein 3	5
dyslexia-associated protein KIAA0319	integrator complex subunit 1	4
telomere-associated protein RIF1	trinucleotide repeat-containing gene 18 protein	13
telomere-associated protein RIF1	protein unc-13 homolog C	7
telomere-associated protein RIF1	B-cell scaffold protein with ankyrin repeats	4
histone-lysine N-methyltransferase 2A	ectonucleoside triphosphate diphosphohydrolase 1	20
transformation/transcription domain-associated protein	histone deacetylase 7	12
neural cell adhesion molecule L1-like protein	RAS guanyl-releasing protein 2	15
neural cell adhesion molecule L1-like protein	exportin-7	3
sodium bicarbonate cotransporter 3	sentrin-specific protease 6	11
sodium bicarbonate cotransporter 3	gamma-tubulin complex component 5	15
multiple PDZ domain protein	receptor-type tyrosine-protein phosphatase mu	29
multiple PDZ domain protein	zinc finger FYVE domain-containing protein 16	13
obscurin	myb-binding protein 1A	4
otogelin	filamin-A	2
homeodomain-interacting protein kinase 3	tartrate-resistant acid phosphatase type 5	7
homeodomain-interacting protein kinase 3	centrosomal protein of 170 kDa protein B	8
protein MON2 homolog	protein TASOR	8
protein MON2 homolog	homeodomain-interacting protein kinase 2	9
protein MON2 homolog	protein SET	9
FH1/FH2 domain-containing protein 3	N-acyl-phosphatidylethanolamine-hydrolyzing phospholipase D	24
DNA polymerase zeta catalytic subunit	BCL-6 corepressor	14
DNA polymerase zeta catalytic subunit	DNA polymerase subunit gamma-1	2
otogelin	centrosomal protein of 55 kDa	7
putative maltase-glucoamylase-like protein FLJ16351	bifunctional UDP-N-acetylglucosamine 2-epimerase/N-acetylmannosamine kinase	9
pecanex-like protein 1	puratrophin-1	8
rho GTPase-activating protein 7	leucine-rich repeat-containing protein 69	2
protein mono-ADP-ribosyltransferase PARP10	Golgi-associated kinase 1A	1
envoplakin	latent-transforming growth factor beta-binding protein 3	6
sodium bicarbonate cotransporter 3	dysferlin	16
sodium bicarbonate cotransporter 3	apoptosis-inducing factor 1, mitochondrial	3
sodium bicarbonate cotransporter 3	fibronectin type III domain-containing protein 3B	7
sodium bicarbonate cotransporter 3	clathrin heavy chain linker domain-containing protein 1	11
sodium bicarbonate cotransporter 3	von Willebrand factor D and EGF domain-containing protein	8
sodium bicarbonate cotransporter 3	polyunsaturated fatty acid lipoxygenase ALOX15	1
protein NPAT	protein phosphatase 1 regulatory subunit 12A	5
multiple PDZ domain protein	calpain-8	5
thyroid adenoma-associated protein	CTP synthase 2	8
unconventional myosin-XVIIIa	protein shisa-7	1
rho GTPase-activating protein 7	transmembrane channel-like protein 4	3
rho GTPase-activating protein 7	protein FAM186A	4
rho GTPase-activating protein 7	CD109 antigen	3
rho GTPase-activating protein 7	teneurin-1	15
protein TANC1	maestro heat-like repeat-containing protein family member 9	3
protein TANC1	ankyrin repeat domain-containing protein 31	14
protein TANC1	mucin-12	1
dyslexia-associated protein KIAA0319	immunoglobulin-like and fibronectin type III domain-containing protein 1	7
dyslexia-associated protein KIAA0319	DNA excision repair protein ERCC-1	15
dyslexia-associated protein KIAA0319	carnosine synthase 1	4
dyslexia-associated protein KIAA0319	valine--tRNA ligase, mitochondrial	3
dyslexia-associated protein KIAA0319	cancer-associated gene 1 protein	3
dyslexia-associated protein KIAA0319	sushi repeat-containing protein SRPX	5
nuclear pore complex protein Nup98-Nup96	chloride channel protein 2	7
zinc finger protein 469	magnesium transporter NIPA4	4
nck-associated protein 5-like	zinc finger protein 573	5
DNA polymerase zeta catalytic subunit	bromodomain-containing protein 7	10
multiple PDZ domain protein	RING finger protein 17	15
multiple PDZ domain protein	claspin	6
multiple PDZ domain protein	mitochondrial glutamate carrier 1	9
multiple PDZ domain protein	schlafen family member 12-like	8
multiple PDZ domain protein	lipopolysaccharide-responsive and beige-like anchor protein	10
multiple PDZ domain protein	disheveled-associated activator of morphogenesis 2	9
multiple PDZ domain protein	inactive serine/threonine-protein kinase TEX14	5
multiple PDZ domain protein	coronin-7	4
multiple PDZ domain protein	CORO7-PAM16 protein	1
multiple PDZ domain protein	protein CASP	7
multiple PDZ domain protein	pikachurin	3
multiple PDZ domain protein	abnormal spindle-like microcephaly-associated protein	2
transformation/transcription domain-associated protein	huntingtin-interacting protein 1	6
baculoviral IAP repeat-containing protein 6	serine/threonine-protein kinase 36	8
multiple PDZ domain protein	kinesin-like protein KIF1A	24
sorbin and SH3 domain-containing protein 1	macrophage-stimulating protein receptor	10
sorbin and SH3 domain-containing protein 1	non-receptor tyrosine-protein kinase TNK1	6
sorbin and SH3 domain-containing protein 1	rho GTPase-activating protein 22	20
sorbin and SH3 domain-containing protein 1	unconventional myosin-Ia	3
sorbin and SH3 domain-containing protein 1	glutaminase kidney	5
obscurin	golgin subfamily B member 1	20
envoplakin	putative tyrosine-protein phosphatase auxilin	3
protein NPAT	syndetin	5
DNA polymerase zeta catalytic subunit	transient receptor potential cation channel subfamily V member 3	2
histone-lysine N-methyltransferase 2D	nebulin-related-anchoring protein	10
transformation/transcription domain-associated protein	kinesin-like protein KIF18B	9
sodium bicarbonate cotransporter 3	inactive tyrosine-protein kinase 7	7
multiple PDZ domain protein	ubiquitin thioesterase OTU1	2
desmoplakin	chromodomain-helicase-DNA-binding protein 4	3
reelin	sacsin	6
TP53-binding protein 1	polycystic kidney disease protein 1-like 2	2
homeodomain-interacting protein kinase 3	dynamin-1-like protein	13
golgin subfamily A member 3	GTPase-activating protein and VPS9 domain-containing protein 1	27
histone-lysine N-methyltransferase 2A	chondroitin sulfate glucuronyltransferase	2
mucin-3A	cyclic nucleotide-gated cation channel beta-1	4
rho GTPase-activating protein 7	C2 domain-containing protein 3	9
neural cell adhesion molecule L1-like protein	ornithine decarboxylase	4
protein piccolo	transmembrane protein 168	5
dyslexia-associated protein KIAA0319	protein SETSIP	1
pecanex-like protein 1	ubiquitin-associated protein 2-like	34
protein MON2 homolog	maestro heat-like repeat-containing protein family member 1	22
protein PRRC2C	coiled-coil domain-containing protein 187	6
structural maintenance of chromosomes flexible hinge domain-containing protein 1	next to BRCA1 gene 1 protein	11
baculoviral IAP repeat-containing protein 6	epididymis-specific alpha-mannosidase	2
telomere-associated protein RIF1	sodium channel protein type 10 subunit alpha	6
acrosomal protein KIAA1210	cell division cycle-associated protein 3	5
E3 ubiquitin-protein ligase UBR4	sodium/hydrogen exchanger 9B2	12
WD repeat- and FYVE domain-containing protein 4	tight junction protein ZO-1	20
extracellular matrix protein FRAS1	tribbles homolog 3	7
protein mono-ADP-ribosyltransferase PARP10	ATP-dependent RNA helicase SUPV3L1, mitochondrial	7
protein piccolo	cilia- and flagella-associated protein 47	4
protein TANC1	protein capicua homolog	17
obscurin	cilia- and flagella-associated protein 54	2
VPS10 domain-containing receptor SorCS1	tetratricopeptide repeat protein 6	9
fibrocystin	glucocorticoid modulatory element-binding protein 1	8
ATP-binding cassette sub-family A member 13	U2 snRNP-associated SURP motif-containing protein	8
fibrocystin	inactive ubiquitin carboxyl-terminal hydrolase 54	35
reelin	sodium/hydrogen exchanger 10	10
dynein heavy chain 17, axonemal	E3 SUMO-protein ligase PIAS1	9
rho GTPase-activating protein 7	uncharacterized protein C10orf68	48
usherin	lactotransferrin	4
FRAS1-related extracellular matrix protein 2	transmembrane protein 94	29
protein PRRC2C	tyrosine-protein kinase JAK2	7
protein PRRC2C	helicase ARIP4	4
protein PRRC2C	DNA polymerase alpha catalytic subunit	10
protein PRRC2C	NAD(P) transhydrogenase, mitochondrial	9
protein PRRC2C	spindle and centriole-associated protein 1	3
protein PRRC2C	AT-rich interactive domain-containing protein 2	4
protein PRRC2C	zinc finger protein 462	12
protein PRRC2C	androgen receptor	4
protein PRRC2C	intersectin-2	17
protein PRRC2C	ATP-dependent translocase ABCB1	4
telomere-associated protein RIF1	WD repeat-containing protein 49	4
protein TANC1	broad substrate specificity ATP-binding cassette transporter ABCG2	10
homeodomain-interacting protein kinase 3	target of Nesh-SH3	56
MAX gene-associated protein	transmembrane and coiled-coil domain-containing protein 3	14
MAX gene-associated protein	myomegalin	51
MAX gene-associated protein	protein dispatched homolog 1	13
MAX gene-associated protein	protein NOXP20	8
MAX gene-associated protein	DENN domain-containing protein 1A	17
MAX gene-associated protein	complement C1r subcomponent	2
MAX gene-associated protein	sodium-driven chloride bicarbonate exchanger	29
FH1/FH2 domain-containing protein 3	isovaleryl-CoA dehydrogenase, mitochondrial	14
baculoviral IAP repeat-containing protein 6	leishmanolysin-like peptidase 2	1
baculoviral IAP repeat-containing protein 6	fibroblast growth factor receptor 4	5
baculoviral IAP repeat-containing protein 6	leucine-rich repeat-containing protein 9	10
baculoviral IAP repeat-containing protein 6	protocadherin-23	3
baculoviral IAP repeat-containing protein 6	phosphatidylinositol 4-kinase alpha	5
baculoviral IAP repeat-containing protein 6	dual oxidase 2	2
histone-lysine N-methyltransferase SETD5	proteasome adapter and scaffold protein ECM29	7
sodium bicarbonate cotransporter 3	myotubularin-related protein 5	6
sodium bicarbonate cotransporter 3	tudor domain-containing protein 1	20
golgin subfamily A member 3	discoidin, CUB and LCCL domain-containing protein 1	8
golgin subfamily A member 3	uncharacterized protein C1orf112	14
pecanex-like protein 1	autophagy-related protein 2 homolog A	8
pecanex-like protein 1	GATOR complex protein MIOS	7
pecanex-like protein 1	histone acetyltransferase KAT6B	19
pecanex-like protein 1	multimerin-1	3
pecanex-like protein 1	syntaxin-binding protein 1	12
pecanex-like protein 1	sperm-associated antigen 1	9
WD repeat- and FYVE domain-containing protein 4	serine/threonine-protein phosphatase 1 regulatory subunit 10	5
rho GTPase-activating protein 7	plexin-B2	25
protein PRRC2C	leucine-rich repeats and immunoglobulin-like domains protein 1	9
ryanodine receptor 2	liprin-alpha-1	20
baculoviral IAP repeat-containing protein 6	FRAS1-related extracellular matrix protein 1	22
baculoviral IAP repeat-containing protein 6	insulin receptor substrate 4	4
baculoviral IAP repeat-containing protein 6	collagen alpha-1(XIV) chain	4
thyroid adenoma-associated protein	alpha-amylase 2B	2
protein TANC1	cadherin EGF LAG seven-pass G-type receptor 3	1
protein TANC1	ATP-binding cassette sub-family A member 2	3
neural cell adhesion molecule L1-like protein	zinc finger protein 40	15
neural cell adhesion molecule L1-like protein	interleukin-3 receptor subunit alpha	8
neural cell adhesion molecule L1-like protein	transcription factor jun-B	1
sodium bicarbonate cotransporter 3	prolow-density lipoprotein receptor-related protein 1	2
multiple PDZ domain protein	leukocyte tyrosine kinase receptor	10
multiple PDZ domain protein	nidogen-1	2
multiple PDZ domain protein	5'-nucleotidase	2
retroelement silencing factor 1	spectrin alpha chain, erythrocytic 1	5
nck-associated protein 5-like	spectrin beta chain, non-erythrocytic 1	8
histone-lysine N-methyltransferase 2D	transcriptional enhancer factor TEF-3	3
histone-lysine N-methyltransferase 2D	thyroglobulin	13
golgin subfamily A member 3	protein-glutamine gamma-glutamyltransferase 4	2
golgin subfamily A member 3	thimet oligopeptidase	2
E3 ubiquitin-protein ligase MYCBP2	ubiquitin-like modifier-activating enzyme 7	5
E3 ubiquitin-protein ligase MYCBP2	diacylglycerol kinase epsilon	6
E3 ubiquitin-protein ligase MYCBP2	protocadherin-16	1
E3 ubiquitin-protein ligase MYCBP2	probable E3 ubiquitin-protein ligase HERC1	9
E3 ubiquitin-protein ligase MYCBP2	unconventional myosin-IXb	2
E3 ubiquitin-protein ligase MYCBP2	collagen alpha-3(VI) chain	10
pecanex-like protein 1	FYVE, RhoGEF and PH domain-containing protein 1	1
MAX gene-associated protein	sterol regulatory element-binding protein 2	5
protein unc-80 homolog	zinc finger FYVE domain-containing protein 9	4
protein TANC1	dedicator of cytokinesis protein 3	17
protein TANC1	mediator of RNA polymerase II transcription subunit 13	4
protein TANC1	SUMO-activating enzyme subunit 2	6
protein TANC1	insulin receptor substrate 1	1
protein TANC1	laminin subunit alpha-1	1
fibrocystin	laminin subunit alpha-5	5
fibrocystin	lysosome-associated membrane glycoprotein 1	2
fibrocystin	TATA box-binding protein-associated factor RNA polymerase I subunit C	10
fibrocystin	A-kinase anchor protein 9	22
fibrocystin	caprin-1	2
fibrocystin	polycystic kidney disease and receptor for egg jelly-related protein	1
dyslexia-associated protein KIAA0319	activating signal cointegrator 1 complex subunit 3	9
ATP-binding cassette sub-family A member 13	eIF-2-alpha kinase activator GCN1	1
ATP-binding cassette sub-family A member 13	E3 ubiquitin-protein ligase RBBP6	2
ATP-binding cassette sub-family A member 13	transcription initiation factor TFIID subunit 5	2
ATP-binding cassette sub-family A member 13	receptor-type tyrosine-protein phosphatase T	6
ATP-binding cassette sub-family A member 13	follistatin-related protein 1	2
ATP-binding cassette sub-family A member 13	triple functional domain protein	8
protein mono-ADP-ribosyltransferase PARP10	utrophin	11
coiled-coil domain-containing protein 168	exocyst complex component 3	1
MAX gene-associated protein	deleted in lung and esophageal cancer protein 1	8
MAX gene-associated protein	microtubule-actin cross-linking factor 1	1
TP53-binding protein 1	GRB2-associated-binding protein 2	5
TP53-binding protein 1	unconventional myosin-X	5
KAT8 regulatory NSL complex subunit 1	myoferlin	8
dynein heavy chain 17, axonemal	U5 small nuclear ribonucleoprotein 200 kDa helicase	1
structural maintenance of chromosomes flexible hinge domain-containing protein 1	phosphoinositide 3-kinase regulatory subunit 4	1
structural maintenance of chromosomes flexible hinge domain-containing protein 1	proteasome activator complex subunit 4	6
FH1/FH2 domain-containing protein 3	importin-13	1
FH1/FH2 domain-containing protein 3	syndecan-3	1
FH1/FH2 domain-containing protein 3	rootletin	9
FH1/FH2 domain-containing protein 3	ubiquitin carboxyl-terminal hydrolase 34	1
FH1/FH2 domain-containing protein 3	polyphosphoinositide phosphatase	5
FH1/FH2 domain-containing protein 3	phosphatidylinositide phosphatase SAC2	11
neural cell adhesion molecule L1-like protein	msx2-interacting protein	1
neural cell adhesion molecule L1-like protein	talin-2	15
neural cell adhesion molecule L1-like protein	NAD(+) hydrolase SARM1	1
neural cell adhesion molecule L1-like protein	stabilin-1	11
histone-lysine N-methyltransferase SETD5	HEAT repeat-containing protein 5A	1
histone-lysine N-methyltransferase SETD5	dynein heavy chain 1, axonemal	6
sodium bicarbonate cotransporter 3	oxysterol-binding protein-related protein 3	13
sodium bicarbonate cotransporter 3	chromodomain-helicase-DNA-binding protein 5	1
sodium bicarbonate cotransporter 3	ATP-binding cassette sub-family A member 12	3
sodium bicarbonate cotransporter 3	neuroblastoma-amplified sequence	7
sodium bicarbonate cotransporter 3	remodeling and spacing factor 1	3
golgin subfamily A member 3	serine/threonine-protein kinase MRCK gamma	12
E3 ubiquitin-protein ligase MYCBP2	ankyrin repeat and KH domain-containing protein 1	4
E3 ubiquitin-protein ligase MYCBP2	chromodomain-helicase-DNA-binding protein 7	8
DNA polymerase zeta catalytic subunit	F-box only protein 34	7
DNA polymerase zeta catalytic subunit	WD repeat-containing protein 11	7
DNA polymerase zeta catalytic subunit	prolyl 3-hydroxylase 2	3
DNA polymerase zeta catalytic subunit	ubiquitin-like modifier-activating enzyme 6	2
DNA polymerase zeta catalytic subunit	leucine-rich repeat-containing protein 36	17
nck-associated protein 5-like	transcription factor TFIIIB component B'' homolog	8
histone-lysine N-methyltransferase 2D	KICSTOR complex protein ITFG2	5
histone-lysine N-methyltransferase 2D	ATP-binding cassette sub-family A member 5	2
histone-lysine N-methyltransferase 2D	dynein heavy chain 7, axonemal	11
histone-lysine N-methyltransferase 2D	protein phosphatase Slingshot homolog 1	11
histone-lysine N-methyltransferase 2D	inactive ubiquitin thioesterase OTULINL	2
histone-lysine N-methyltransferase 2D	cardiolipin synthase (CMP-forming)	8
WD repeat- and FYVE domain-containing protein 4	YLP motif-containing protein 1	4
WD repeat- and FYVE domain-containing protein 4	E3 ubiquitin-protein ligase BRE1A	2
WD repeat- and FYVE domain-containing protein 4	ankyrin repeat domain-containing protein 50	3
E3 ubiquitin-protein ligase UBR4	brefeldin A-inhibited guanine nucleotide-exchange protein 3	1
E3 ubiquitin-protein ligase UBR4	V-type proton ATPase 116 kDa subunit a	5
E3 ubiquitin-protein ligase UBR4	chromobox protein homolog 8	1
E3 ubiquitin-protein ligase UBR4	ANKHD1-EIF4EBP3 protein	1
histone-lysine N-methyltransferase 2A	neurolysin, mitochondrial	4
histone-lysine N-methyltransferase 2A	protein HEG homolog 1	2
histone-lysine N-methyltransferase 2A	stAR-related lipid transfer protein 9	15
protein NPAT	cingulin	2
teneurin-4	zinc finger SWIM domain-containing protein 5	3
protein PRRC2C	immunoglobulin superfamily DCC subclass member 4	5
protein PRRC2C	spectrin beta chain, non-erythrocytic 4	6
protein PRRC2C	zinc finger protein 335	4
E3 ubiquitin-protein ligase UBR4	transient receptor potential cation channel subfamily M member 8	6
E3 ubiquitin-protein ligase UBR4	iroquois-class homeodomain protein IRX-1	2
E3 ubiquitin-protein ligase UBR4	androglobin	1
E3 ubiquitin-protein ligase UBR4	cyclin-P	2
E3 ubiquitin-protein ligase UBR4	nuclear pore membrane glycoprotein 210	8
E3 ubiquitin-protein ligase UBR4	pleckstrin homology domain-containing family H member 3	7
E3 ubiquitin-protein ligase UBR4	protein WWC2	3
protein phosphatase 1 regulatory subunit 12B	GPI mannosyltransferase 4	9
protein phosphatase 1 regulatory subunit 12B	protein HID1	2
protein phosphatase 1 regulatory subunit 12B	lysine-specific demethylase 7A	2
protein phosphatase 1 regulatory subunit 12B	ankyrin repeat domain-containing protein 13C	8
telomere-associated protein RIF1	inactive hydroxysteroid dehydrogenase-like protein 1	3
telomere-associated protein RIF1	chromodomain-helicase-DNA-binding protein 6	11
telomere-associated protein RIF1	nicolin-1	1
telomere-associated protein RIF1	zinc finger protein 528	11
baculoviral IAP repeat-containing protein 6	kiSS-1 receptor	2
baculoviral IAP repeat-containing protein 6	zinc finger protein 503	1
baculoviral IAP repeat-containing protein 6	CUB and sushi domain-containing protein 1	5
baculoviral IAP repeat-containing protein 6	centrosomal protein of 295 kDa	17
protein TANC1	cortactin-binding protein 2	12
protein TANC1	EMILIN-3	1
protein TANC1	methyl-CpG-binding domain protein 6	7
protein TANC1	serine/threonine-protein kinase 11-interacting protein	4
protein TANC1	discoidin, CUB and LCCL domain-containing protein 2	4
protein TANC1	phosphatidylinositol 3,4,5-trisphosphate 3-phosphatase TPTE2	4
protein TANC1	glutamate receptor ionotropic, NMDA 3A	2
protein TANC1	arf-GAP with GTPase, ANK repeat and PH domain-containing protein 11	1
protein TANC1	ankyrin repeat domain-containing protein 24	13
protein TANC1	polycystic kidney disease protein 1-like 1	2
protein TANC1	AP-5 complex subunit beta-1	1
neural cell adhesion molecule L1-like protein	nucleoredoxin-like protein 1	1
neural cell adhesion molecule L1-like protein	solute carrier family 7 member 13	2
neural cell adhesion molecule L1-like protein	thiosulfate sulfurtransferase/rhodanese-like domain-containing protein 2	1
neural cell adhesion molecule L1-like protein	DC-STAMP domain-containing protein 2	3
neural cell adhesion molecule L1-like protein	tektin-4	4
neural cell adhesion molecule L1-like protein	zinc finger protein 296	1
neural cell adhesion molecule L1-like protein	limbin	5
neural cell adhesion molecule L1-like protein	checkpoint protein HUS1B	1
histone-lysine N-methyltransferase SETD5	junction-mediating and -regulatory protein	3
histone-lysine N-methyltransferase SETD5	transmembrane channel-like protein 8	15
histone-lysine N-methyltransferase SETD5	protein sidekick-1	11
sodium bicarbonate cotransporter 3	nephrocystin-3	1
sodium bicarbonate cotransporter 3	adhesion G-protein coupled receptor G4	3
transmembrane protein KIAA1109	tripartite motif-containing protein 35	4
transmembrane protein KIAA1109	voltage-dependent calcium channel subunit alpha-2/delta-4	2
fibrocystin	maestro heat-like repeat-containing protein family member 2B	3
fibrocystin	neuronal tyrosine-phosphorylated phosphoinositide-3-kinase adapter 1	1
fibrocystin	protein PRR14L	1
fibrocystin	rotatin	17
fibrocystin	BPI fold-containing family C protein	6
DNA polymerase zeta catalytic subunit	exocyst complex component 8	1
DNA polymerase zeta catalytic subunit	leucine-rich repeat transmembrane neuronal protein 1	3
DNA polymerase zeta catalytic subunit	polycystic kidney disease protein 1-like 3	12
dyslexia-associated protein KIAA0319	periaxin	4
dyslexia-associated protein KIAA0319	myelin regulatory factor-like protein	13
dyslexia-associated protein KIAA0319	leucine-rich repeat serine/threonine-protein kinase 2	10
dyslexia-associated protein KIAA0319	putative tyrosine-protein phosphatase TPTE	4
dyslexia-associated protein KIAA0319	coiled-coil domain-containing protein 137	3
dyslexia-associated protein KIAA0319	inactive N-acetylated-alpha-linked acidic dipeptidase-like protein 2	20
dyslexia-associated protein KIAA0319	peroxisomal N(1)-acetyl-spermine/spermidine oxidase	2
multiple PDZ domain protein	OTU domain-containing protein 6A	1
multiple PDZ domain protein	SKI/DACH domain-containing protein 1	5
WD repeat- and FYVE domain-containing protein 4	protein RRNAD1	9
homeodomain-interacting protein kinase 3	protein furry homolog-like	17
teneurin-4	dynein heavy chain 5, axonemal	16
teneurin-4	ATP-dependent 6-phosphofructokinase, platelet type	15
protein NPAT	protein TASOR 2	24
protein NPAT	A disintegrin and metalloproteinase with thrombospondin motifs 7	3
protein MON2 homolog	katanin-interacting protein	18
protein MON2 homolog	microfibrillar-associated protein 3-like	14
WASH complex subunit 4	neuronal PAS domain-containing protein 3	18
inositol 1,4,5-trisphosphate receptor type 2	serine/threonine-protein kinase MRCK beta	6
E3 ubiquitin-protein ligase MYCBP2	transforming acidic coiled-coil-containing protein 2	44
E3 ubiquitin-protein ligase MYCBP2	solute carrier family 22 member 14	8
E3 ubiquitin-protein ligase MYCBP2	rho GTPase-activating protein 23	11
E3 ubiquitin-protein ligase MYCBP2	R3H domain-containing protein 1	39
pecanex-like protein 1	bile salt export pump	9
pecanex-like protein 1	lysosome-associated membrane glycoprotein 3	5
NLR family CARD domain-containing protein 3	ligand-dependent nuclear receptor corepressor-like protein	12
NLR family CARD domain-containing protein 3	importin subunit alpha-8	11
zinc finger protein 469	unconventional myosin-XIX	16
KAT8 regulatory NSL complex subunit 1	SH2 domain-containing protein 6	28
structural maintenance of chromosomes flexible hinge domain-containing protein 1	anoctamin-4	20
FH1/FH2 domain-containing protein 3	E3 ubiquitin-protein ligase MIB2	32
FH1/FH2 domain-containing protein 3	coiled-coil domain-containing protein 88B	9
FH1/FH2 domain-containing protein 3	GRB2-associated-binding protein 4	8
FH1/FH2 domain-containing protein 3	serine/threonine-protein phosphatase 2A regulatory subunit B'' subunit alpha	6
E3 ubiquitin-protein ligase HUWE1	O-phosphoseryl-tRNA(Sec) selenium transferase	6
multiple PDZ domain protein	tetratricopeptide repeat protein 23-like	16
golgin subfamily A member 3	opioid growth factor receptor-like protein 1	5
golgin subfamily A member 3	cyclin-D-binding Myb-like transcription factor 1	36
golgin subfamily A member 3	vasoactive intestinal polypeptide receptor 2	13
golgin subfamily A member 3	exocyst complex component 7	15
golgin subfamily A member 3	EF-hand calcium-binding domain-containing protein 8	6
pecanex-like protein 1	argininosuccinate lyase	4
dynein heavy chain 17, axonemal	complement C3	1
FH1/FH2 domain-containing protein 3	voltage-dependent P/Q-type calcium channel subunit alpha-1A	5
telomere-associated protein RIF1	collagen alpha-2(I) chain	1
protein TANC1	collagen alpha-1(V) chain	3
N(4)-(beta-N-acetylglucosaminyl)-L-asparaginase	dihydrolipoyl dehydrogenase, mitochondrial	4
Hermansky-Pudlak syndrome 1 protein	dystrophin	18
laminin subunit alpha-2	sulfate transporter	2
glutamate receptor 2	erythrocyte membrane protein band 4.2	8
glutamate receptor 1	epoxide hydrolase 1	10
glutamate receptor 3	DNA repair protein complementing XP-G cells	1
glutamate receptor 4	DNA excision repair protein ERCC-6	2
interleukin-7	electron transfer flavoprotein subunit alpha, mitochondrial	2
serine/threonine-protein kinase WNK3	coagulation factor VIII	2
fibroblast growth factor receptor-like 1	fibroblast growth factor receptor 2	24
fibroblast growth factor receptor-like 1	glycine receptor subunit alpha-1	3
uromodulin-like 1	glucocorticoid receptor	24
chromodomain-helicase-DNA-binding protein 3	sonic hedgehog protein	3
chromodomain-helicase-DNA-binding protein 3	laminin subunit beta-3	5
WASH complex subunit 2A	lysosomal acid lipase/cholesteryl ester hydrolase	3
protocadherin Fat 3	myeloperoxidase	1
DNA excision repair protein ERCC-6-like	DNA mismatch repair protein Msh2	4
VPS10 domain-containing receptor SorCS1	microsomal triglyceride transfer protein large subunit	3
Fanconi anemia group D2 protein	NPC intracellular cholesterol transporter 1	9
neuron navigator 3	peroxisome biogenesis factor 6	3
AT-hook DNA-binding motif-containing protein 1	polycystin-2	4
sorbin and SH3 domain-containing protein 1	vitamin K-dependent protein S	2
helicase with zinc finger domain 2	retinoblastoma-associated protein	2
solute carrier family 2, facilitated glucose transporter member 4	neutral and basic amino acid transport protein rBAT	2
solute carrier family 26 member 6	retinal-specific phospholipid-transporting ATPase ABCA4	1
glutamate receptor 4	ATP-binding cassette sub-family C member 8	11
nuclear receptor corepressor 2	treacle protein	19
cubilin	thrombomodulin	1
laminin subunit alpha-2	hamartin	12
MAX gene-associated protein	thyrotropin receptor	3
RB1-inducible coiled-coil protein 1	tyrosinase	2
glutamate receptor 2	canalicular multispecific organic anion transporter 1	5
glutamate receptor 2	cytochrome b-245 heavy chain	1
coatomer subunit alpha	keratin, type II cytoskeletal 5	1
roquin-2	neural cell adhesion molecule L1	4
maestro heat-like repeat-containing protein family member 6	pendrin	3
laminin subunit alpha-4	plectin	22
laminin subunit alpha-4	thrombopoietin	8
neuron navigator 2	peroxisome biogenesis factor 1	4
glutamate receptor 1	collagen alpha-1(XVII) chain	1
coiled-coil domain-containing protein 17	low-density lipoprotein receptor	6
laminin subunit alpha-3	lysosomal alpha-mannosidase	4
lipase member M	von Willebrand factor	1
inositol hexakisphosphate and diphosphoinositol-pentakisphosphate kinase 1	nitric oxide synthase, brain	4
inositol hexakisphosphate and diphosphoinositol-pentakisphosphate kinase 1	latent-transforming growth factor beta-binding protein 1	22
protein eyes shut homolog	C-X-C chemokine receptor type 1	1
SLIT and NTRK-like protein 2	transforming growth factor beta-1 proprotein	2
SLIT and NTRK-like protein 2	adenosine receptor A1	6
SLIT and NTRK-like protein 2	adenosine receptor A2b	3
SLIT and NTRK-like protein 2	sodium/potassium-transporting ATPase subunit alpha-1	5
SLIT and NTRK-like protein 2	vasopressin V1a receptor	1
SLIT and NTRK-like protein 2	voltage-dependent L-type calcium channel subunit alpha-1C	56
SLIT and NTRK-like protein 2	voltage-dependent calcium channel subunit alpha-2/delta-1	13
NHS-like protein 1	neuronal acetylcholine receptor subunit alpha-7	8
protein sidekick-2	cytochrome P450 2F1	10
uncharacterized protein KIAA1671	glutamate decarboxylase 1	5
histone-lysine N-methyltransferase SETDB1	glutamate receptor ionotropic, NMDA 2D	2
otoancorin	metabotropic glutamate receptor 5	4
MAX gene-associated protein	cation-independent mannose-6-phosphate receptor	1
nebulin	interleukin-2 receptor subunit beta	3
nebulin	integrin beta-6	7
glutamate receptor ionotropic, kainate 2	atrial natriuretic peptide receptor 1	3
protein strawberry notch homolog 1	atrial natriuretic peptide receptor 3	4
protocadherin-11 X-linked	progesterone receptor	6
protocadherin-11 X-linked	prostacyclin synthase	1
protocadherin-11 X-linked	60S ribosomal protein L6	10
chromodomain-helicase-DNA-binding protein 8	lanosterol synthase	4
N(4)-(beta-N-acetylglucosaminyl)-L-asparaginase	calcium-transporting ATPase type 2C member 1	16
golgin subfamily A member 3	UTP--glucose-1-phosphate uridylyltransferase	5
coiled-coil domain-containing protein 17	high affinity cGMP-specific 3',5'-cyclic phosphodiesterase 9A	25
inositol hexakisphosphate and diphosphoinositol-pentakisphosphate kinase 1	olfactory receptor 9A2	1
nuclear receptor corepressor 1	exosome component 10	3
uromodulin-like 1	ATP-dependent 6-phosphofructokinase, liver type	11
uromodulin-like 1	anaphase-promoting complex subunit 11	1
interleukin-7	decreased expression in renal and prostate cancer protein	4
interleukin-7	Fc receptor-like B	2
interleukin-7	voltage-dependent T-type calcium channel subunit alpha-1I	5
BIVM-ERCC5 protein	leptin receptor	6
VPS10 domain-containing receptor SorCS1	peregrin	11
VPS10 domain-containing receptor SorCS1	ras-responsive element-binding protein 1	4
VPS10 domain-containing receptor SorCS1	fibulin-2	4
VPS10 domain-containing receptor SorCS1	olfactory receptor 4F4	1
nuclear receptor corepressor 2	olfactory receptor 10S1	1
neuron navigator 2	olfactory receptor 8U1	1
glutamate receptor 1	olfactory receptor 8J1	1
glutamate receptor 1	olfactory receptor 9I1	1
glutamate receptor 1	olfactory receptor 9G1	1
glutamate receptor 1	olfactory receptor 4F17	1
glutamate receptor 1	olfactory receptor 4A15	1
disheveled-associated activator of morphogenesis 1	olfactory receptor 5AK2	1
hydrocephalus-inducing protein homolog	olfactory receptor 5H1	1
nebulin	olfactory receptor 4F5	1
thyroid adenoma-associated protein	olfactory receptor 5H14	1
thyroid adenoma-associated protein	glycosyltransferase-like domain-containing protein 1	79
slit homolog 3 protein	zinc finger protein 473	3
dynein heavy chain 11, axonemal	complement receptor type 2	3
SKI family transcriptional corepressor 2	BDNF/NT-3 growth factors receptor	38
protein MON2 homolog	GATOR complex protein DEPDC5	22
elastin	A-kinase anchor protein 14	3
solute carrier family 26 member 6	centrosomal protein of 131 kDa	12
solute carrier family 26 member 6	basic helix-loop-helix domain-containing protein USF3	6
FH1/FH2 domain-containing protein 3	vacuolar protein sorting-associated protein 8 homolog	19
signal-induced proliferation-associated 1-like protein 1	uncharacterized protein C1orf167	14
signal-induced proliferation-associated 1-like protein 1	N-alpha-acetyltransferase 30	1
signal-induced proliferation-associated 1-like protein 1	integral membrane protein 2C	5
anillin	keratin-associated protein 5-10	1
anillin	zinc finger protein with KRAB and SCAN domains 2	2
centrosomal protein of 162 kDa	olfactory receptor 8U9	1
general transcription factor 3C polypeptide 1	olfactory receptor 9G9	1
protein FAM214A	putative fidgetin-like protein 2	5
anaphase-promoting complex subunit 4	diacylglycerol kinase kappa	2
1-phosphatidylinositol 4,5-bisphosphate phosphodiesterase epsilon-1	neurochondrin	3
filamin-A-interacting protein 1	rhotekin	9
dedicator of cytokinesis protein 10	purine-rich element-binding protein gamma	4
sorbin and SH3 domain-containing protein 1	coiled-coil domain-containing protein 157	11
catenin alpha-1	phosphatidylinositol 3,4,5-trisphosphate 5-phosphatase 1	3
dmX-like protein 1	DDB1- and CUL4-associated factor 8-like protein 1	1
hemicentin-2	zinc finger and BTB domain-containing protein 16	8
protein eyes shut homolog	vacuolar protein sorting-associated protein 13A	4
histone-lysine N-methyltransferase SETD5	kalirin	32
WASH complex subunit 4	wiskott-Aldrich syndrome protein family member 1	4
mitogen-activated protein kinase kinase kinase 6	solute carrier family 2, facilitated glucose transporter member 11	4
filamin-A-interacting protein 1	zinc finger protein 816	3
transcription factor-like 5 protein	apoptosis-stimulating of p53 protein 2	4
solute carrier family 22 member 5	IQ domain-containing protein H	2
matrilin-2	serine/threonine-protein kinase Nek10	21
nuclear receptor coactivator 6	LON peptidase N-terminal domain and RING finger protein 3	5
unconventional myosin-XVIIIb	E3 ubiquitin-protein ligase Praja-1	4
A disintegrin and metalloproteinase with thrombospondin motifs 9	integral membrane protein GPR155	7
neuronal PAS domain-containing protein 4	transcription termination factor 2, mitochondrial	6
Fanconi anemia group D2 protein	membrane-associated guanylate kinase, WW and PDZ domain-containing protein 1	6
palmitoyltransferase ZDHHC23	protein unc-45 homolog B	5
palmitoyltransferase ZDHHC23	acyl-coenzyme A thioesterase 9, mitochondrial	3
palmitoyltransferase ZDHHC23	protein PTHB1	24
thyroid receptor-interacting protein 11	zinc finger protein 404	1
Hermansky-Pudlak syndrome 1 protein	protein Niban 2	4
Hermansky-Pudlak syndrome 1 protein	neuronal cell adhesion molecule	97
Hermansky-Pudlak syndrome 1 protein	endothelin-converting enzyme 2	3
Hermansky-Pudlak syndrome 1 protein	phytanoyl-CoA dioxygenase, peroxisomal	6
Hermansky-Pudlak syndrome 1 protein	fer-1-like protein 6	7
Hermansky-Pudlak syndrome 1 protein	macrophage-expressed gene 1 protein	1
pleckstrin homology domain-containing family A member 7	serine/threonine-protein kinase MARK2	17
pleckstrin homology domain-containing family A member 7	dnaJ homolog subfamily B member 2	2
WASH complex subunit 2C	angiopoietin-related protein 4	4
protein phosphatase 1 regulatory subunit 12B	trophinin	20
RNA polymerase-associated protein CTR9 homolog	echinoderm microtubule-associated protein-like 6	6
baculoviral IAP repeat-containing protein 1	cerebellin-3	1
dmX-like protein 1	ankyrin repeat domain-containing protein 34A	1
histone-lysine N-methyltransferase SETD5	mucin-17	1
protein TANC1	terminal nucleotidyltransferase 4B	8
dyslexia-associated protein KIAA0319	coiled-coil domain-containing protein 112	2
dyslexia-associated protein KIAA0319	myotubularin-related protein 12	3
protein AHNAK2	endoplasmic reticulum aminopeptidase 1	14
pleckstrin homology domain-containing family G member 2	transmembrane protein 80	5
signal-induced proliferation-associated 1-like protein 1	acyl-CoA-binding domain-containing protein 5	45
signal-induced proliferation-associated 1-like protein 1	sodium/hydrogen exchanger 6	9
signal-induced proliferation-associated 1-like protein 1	cohesin subunit SA-2	21
signal-induced proliferation-associated 1-like protein 1	stromal membrane-associated protein 1	10
inositol hexakisphosphate and diphosphoinositol-pentakisphosphate kinase 1	somatostatin receptor type 2	1
inositol hexakisphosphate and diphosphoinositol-pentakisphosphate kinase 1	serotransferrin	3
inositol hexakisphosphate and diphosphoinositol-pentakisphosphate kinase 1	DNA topoisomerase 2-beta	3
inositol hexakisphosphate and diphosphoinositol-pentakisphosphate kinase 1	mitotic-spindle organizing protein 1	1
inositol hexakisphosphate and diphosphoinositol-pentakisphosphate kinase 1	RING finger protein 214	3
inositol hexakisphosphate and diphosphoinositol-pentakisphosphate kinase 1	interferon regulatory factor 2-binding protein 2	2
inositol hexakisphosphate and diphosphoinositol-pentakisphosphate kinase 1	arf-GAP with GTPase, ANK repeat and PH domain-containing protein 6	2
inositol hexakisphosphate and diphosphoinositol-pentakisphosphate kinase 1	dapper homolog 1	2
inositol hexakisphosphate and diphosphoinositol-pentakisphosphate kinase 1	zinc finger protein castor homolog 1	7
inositol hexakisphosphate and diphosphoinositol-pentakisphosphate kinase 1	tax1-binding protein 1	6
inositol hexakisphosphate and diphosphoinositol-pentakisphosphate kinase 1	cullin-4B	4
inositol hexakisphosphate and diphosphoinositol-pentakisphosphate kinase 1	DNA repair-scaffolding protein	12
inositol hexakisphosphate and diphosphoinositol-pentakisphosphate kinase 1	serine/threonine-protein kinase LMTK1	2
inositol hexakisphosphate and diphosphoinositol-pentakisphosphate kinase 1	protein unc-13 homolog A	4
inositol hexakisphosphate and diphosphoinositol-pentakisphosphate kinase 1	glutamate receptor-interacting protein 2	6
inositol hexakisphosphate and diphosphoinositol-pentakisphosphate kinase 1	lysine-specific demethylase 6B	9
roquin-2	zinc finger protein 697	3
roquin-2	uncharacterized protein C2orf78	2
dedicator of cytokinesis protein 10	rho guanine nucleotide exchange factor 28	8
palmitoyltransferase ZDHHC23	apical junction component 1 homolog	1
glutamate receptor 1	coiled-coil and C2 domain-containing protein 2A	3
glutamate receptor 1	WAS/WASL-interacting protein family member 3	2
nuclear pore complex protein Nup98-Nup96	coiled-coil domain-containing protein 150	14
nuclear pore complex protein Nup98-Nup96	cactin	4
nuclear pore complex protein Nup98-Nup96	germ cell-specific gene 1 protein	20
nuclear pore complex protein Nup98-Nup96	leukocyte immunoglobulin-like receptor subfamily B member 5	8
putative short-chain dehydrogenase/reductase family 42E member 2	nuclear RNA export factor 1	2
histone-lysine N-methyltransferase, H3 lysine-36 specific	multifunctional procollagen lysine hydroxylase and glycosyltransferase LH3	1
maltase-glucoamylase, intestinal	scavenger receptor class B member 1	11
dynein heavy chain 12, axonemal	CUGBP Elav-like family member 2	68
histone-lysine N-methyltransferase SETDB1	striatin-3	4
histone-lysine N-methyltransferase SETDB1	colorectal mutant cancer protein	9
WASH complex subunit 2C	ATP-binding cassette sub-family A member 3	1
WASH complex subunit 2C	amiloride-sensitive amine oxidase [copper-containing]	6
WASH complex subunit 2C	solute carrier family 35 member G2	8
WASH complex subunit 2C	tudor domain-containing protein 10	16
WASH complex subunit 2C	probable ATP-dependent RNA helicase DDX17	2
WASH complex subunit 2C	patatin-like phospholipase domain-containing protein 7	6
protocadherin Fat 3	protein C1orf43	5
doublecortin domain-containing protein 1	seizure protein 6 homolog	5
receptor-type tyrosine-protein phosphatase zeta	centrosomal protein of 78 kDa	10
receptor-type tyrosine-protein phosphatase zeta	septin-8	18
arf-GAP with Rho-GAP domain, ANK repeat and PH domain-containing protein 1	E3 ubiquitin-protein ligase SH3RF3	3
homeodomain-interacting protein kinase 1	cyclin-K	3
homeodomain-interacting protein kinase 1	cap-specific mRNA (nucleoside-2'-O-)-methyltransferase 2	9
WD repeat- and FYVE domain-containing protein 4	glucoside xylosyltransferase 1	3
fibroblast growth factor receptor-like 1	leucine-rich repeat-containing protein 58	1
protein unc-13 homolog B	regulating synaptic membrane exocytosis protein 2	59
protein unc-13 homolog B	protein strawberry notch homolog 2	3
AT-hook DNA-binding motif-containing protein 1	MICOS complex subunit MIC60	9
dynein heavy chain 6, axonemal	protein FAM184A	3
Fanconi anemia group D2 protein	alpha-actinin-3	2
Fanconi anemia group D2 protein	inositol polyphosphate 4-phosphatase type II	38
dystonin	collagen alpha-6(VI) chain	15
dystonin	protein FAM166C	3
dystonin	coiled-coil domain-containing protein 178	8
multiple PDZ domain protein	gamma-aminobutyric acid receptor subunit rho-3	1
ATP-binding cassette sub-family A member 10	peroxisomal coenzyme A diphosphatase NUDT7	4
glutamate receptor 2	disintegrin and metalloproteinase domain-containing protein 10	3
glutamate receptor 2	uncharacterized protein C16orf92	5
neurobeachin	receptor-type tyrosine-protein phosphatase beta	9
glutamyl aminopeptidase	zinc finger protein 57 homolog	1
sorbin and SH3 domain-containing protein 1	zona pellucida sperm-binding protein 3	3
sorbin and SH3 domain-containing protein 1	ventral anterior homeobox 1	1
sorbin and SH3 domain-containing protein 1	bromodomain-containing protein 2	5
dipeptidyl peptidase 9	adenylate cyclase type 9	3
ciliogenesis and planar polarity effector 1	E3 ubiquitin-protein ligase RNF180	10
neurobeachin	B-cell linker protein	5
protein FAM214A	choline transporter-like protein 3	19
protein FAM214A	synaptopodin 2-like protein	4
protein FAM214A	polyadenylate-binding protein 4-like	2
protein FAM214A	tissue-resident T-cell transcription regulator protein ZNF683	14
protein FAM214A	perilipin-2	2
protein FAM214A	atypical chemokine receptor 1	2
protein FAM214A	peripheral plasma membrane protein CASK	12
protein FAM214A	E3 ubiquitin-protein ligase LNX	6
protein FAM214A	thiamine-triphosphatase	6
protein FAM214A	transmembrane channel-like protein 6	14
protein FAM214A	zinc transporter ZIP10	9
microtubule-associated protein 4	gasdermin-E	3
microtubule-associated protein 4	filamin-C	2
microtubule-associated protein 4	serine protease inhibitor Kazal-type 5	4
microtubule-associated protein 4	sal-like protein 1	2
microtubule-associated protein 4	zinc finger E-box-binding homeobox 1	44
general transcription factor 3C polypeptide 1	tandem C2 domains nuclear protein	4
DNA damage-binding protein 1	rho guanine nucleotide exchange factor 3	18
laminin subunit alpha-4	transcription activator BRG1	20
laminin subunit beta-2	tRNA modification GTPase GTPBP3, mitochondrial	4
matrilin-2	ectonucleoside triphosphate diphosphohydrolase 4	2
mucin-2	C-type lectin domain family 12 member B	9
protein phosphatase 1 regulatory subunit 12B	TRPM8 channel-associated factor 2	8
receptor-type tyrosine-protein phosphatase zeta	spectrin alpha chain, non-erythrocytic 1	19
solute carrier family 22 member 5	myocyte-specific enhancer factor 2C	47
slit homolog 3 protein	striatin-interacting protein 2	7
nuclear receptor-interacting protein 1	palmitoyltransferase ZDHHC4	14
ras GTPase-activating-like protein IQGAP1	desmoglein-4	3
myomesin-2	zinc finger protein 213	3
thyroid receptor-interacting protein 11	leucine-rich repeat transmembrane neuronal protein 4	5
coatomer subunit alpha	solute carrier family 12 member 5	2
versican core protein	retrotransposon-like protein 1	1
low-density lipoprotein receptor-related protein 2	leucine-rich repeat-containing protein 15	2
baculoviral IAP repeat-containing protein 1	arf-GAP with SH3 domain, ANK repeat and PH domain-containing protein 2	12
nebulin	receptor-type tyrosine-protein phosphatase kappa	16
maltase-glucoamylase, intestinal	polyadenylate-binding protein 4	3
mitogen-activated protein kinase kinase kinase 6	islet cell autoantigen 1	36
disks large homolog 5	Nance-Horan syndrome protein	5
symplekin	PTGES3L-AARSD1 protein	2
protocadherin Fat 1	zinc finger MYND domain-containing protein 15	4
nucleolin	leishmanolysin-like peptidase	2
laminin subunit gamma-2	minichromosome maintenance domain-containing protein 2	12
chromodomain-helicase-DNA-binding protein 3	synaptotagmin-2	8
bone morphogenetic protein 1	zinc finger protein 732	1
talin-1	anaphase-promoting complex subunit 7	1
nuclear receptor corepressor 2	regulator of G-protein signaling protein-like	13
transcription factor-like 5 protein	protein FAM205A	1
glutamate receptor 3	structural maintenance of chromosomes protein 6	8
histone-lysine N-methyltransferase SETDB1	sequestosome-1	3
splicing factor 3B subunit 1	protein spinster homolog 1	9
anaphase-promoting complex subunit 4	fas apoptotic inhibitory molecule 3	5
nuclear receptor coactivator 6	DNA repair protein RAD51 homolog 4	2
sodium-dependent proline transporter	protein transport protein Sec61 subunit alpha	4
midasin	interleukin-11 receptor subunit alpha	1
RNA polymerase-associated protein CTR9 homolog	angiopoietin-1	3
inositol hexakisphosphate and diphosphoinositol-pentakisphosphate kinase 1	zinc finger BED domain-containing protein 5	2
dedicator of cytokinesis protein 10	serine/threonine-protein kinase Sgk1	6
RB1-inducible coiled-coil protein 1	DIS3-like exonuclease 1	12
pecanex-like protein 2	tyrosine-protein kinase Fes/Fps	12
centrosomal protein of 162 kDa	coiled-coil domain-containing protein 68	11
neuron navigator 3	nuclear factor related to kappa-B-binding protein	17
disheveled-associated activator of morphogenesis 1	solute carrier family 13 member 5	5
E3 ubiquitin-protein ligase MYCBP2	cGMP-dependent 3',5'-cyclic phosphodiesterase	5
serine/threonine-protein kinase SMG1	protein unc-93 homolog A	7
arf-GAP with Rho-GAP domain, ANK repeat and PH domain-containing protein 1	transducin-like enhancer protein 6	8
WASH complex subunit 4	arf-GAP with GTPase, ANK repeat and PH domain-containing protein 5	1
little elongation complex subunit 1	RNA cytidine acetyltransferase	2
E3 ubiquitin-protein ligase HECTD1	protein SCAI	2
RNA polymerase II-associated protein 1	cbp/p300-interacting transactivator 1	5
signal-induced proliferation-associated 1-like protein 1	protein ANKUB1	7
neurobeachin	uncharacterized protein C2orf72	1
filamin-A-interacting protein 1	serine/threonine-protein kinase Nek6	12
BRD4-interacting chromatin-remodeling complex-associated protein	uncharacterized protein C16orf96	4
nuclear pore complex protein Nup98-Nup96	conserved oligomeric Golgi complex subunit 2	2
1-phosphatidylinositol 4,5-bisphosphate phosphodiesterase epsilon-1	solute carrier organic anion transporter family member 3A1	5
homeobox protein SIX4	RRP12-like protein	6
stabilin-2	E3 ubiquitin-protein ligase makorin-1	3
DNA excision repair protein ERCC-6-like	corticotropin-releasing factor receptor 1	6
PH-interacting protein	properdin	2
protein strawberry notch homolog 1	zinc finger Y-chromosomal protein	13
4'-phosphopantetheine phosphatase	tyrosine-protein phosphatase non-receptor type 3	17
anillin	lipoxygenase homology domain-containing protein 1	19
laminin subunit gamma-2	histone-lysine N-methyltransferase EHMT1	23
protein FAM214A	ankyrin-2	14
manganese-transporting ATPase 13A1	ras-specific guanine nucleotide-releasing factor 1	10
reticulon-4	cancer/testis antigen 47B	2
caskin-1	cell division cycle protein 20 homolog B	4
doublecortin domain-containing protein 1	peptidyl-prolyl cis-trans isomerase FKBP5	4
serine/threonine-protein kinase WNK3	transketolase-like protein 1	3
carbohydrate sulfotransferase 6	semaphorin-7A	3
fibroblast growth factor receptor-like 1	tudor domain-containing protein 3	3
glutamate receptor ionotropic, kainate 2	RNA polymerase II-associated protein 3	3
histone-lysine N-methyltransferase, H3 lysine-36 specific	protein mono-ADP-ribosyltransferase PARP9	11
anaphase-promoting complex subunit 1	V-set and transmembrane domain-containing protein 2B	8
pleckstrin homology domain-containing family G member 2	NK1 transcription factor-related protein 2	1
baculoviral IAP repeat-containing protein 1	transmembrane protein 88B	1
solute carrier family 26 member 6	lysine-specific demethylase 4C	17
ciliogenesis and planar polarity effector 1	annexin A11	10
transport and Golgi organization protein 6 homolog	polyamine deacetylase HDAC10	2
multimerin-2	cytosolic phospholipase A2 gamma	10
phosphatidylinositol 3,4,5-trisphosphate-dependent Rac exchanger 2 protein	BUD13 homolog	3
dedicator of cytokinesis protein 5	active breakpoint cluster region-related protein	18
A disintegrin and metalloproteinase with thrombospondin motifs 20	zinc finger CCCH domain-containing protein 14	22
FH1/FH2 domain-containing protein 3	pannexin-2	2
SLIT and NTRK-like protein 2	transmembrane channel-like protein 7	4
ubiquitin carboxyl-terminal hydrolase 32	insulin-like growth factor 2 mRNA-binding protein 1	5
unconventional myosin-XVIIIb	ADP-ribosylation factor-like protein 13A	3
hepatitis A virus cellular receptor 2	lysophosphatidic acid receptor 6	6
protocadherin-11 X-linked	HIV Tat-specific factor 1	3
protocadherin-11 X-linked	carboxypeptidase A4	2
protocadherin-11 Y-linked	RNA helicase Mov10l1	16
[truncated: 37,880 more rows]

## Sheet: Sheet4
混ざり物タンパク質名 ホモサピ削除	アミノ酸数	純粋タンパク質名（ホモサピ削除）	アミノ酸数
[truncated: 51,143 more rows]
