# Supplementary material for: In Silico and In Vitro Evaluation of the Molecular Mimicry of the SARS-CoV-2 Spike Protein by Common Short Constituent Sequences (cSCSs) in the Human Proteome: Toward Safer Epitope Design for Vaccine Development
Source: Vaccines (Basel). 2024 May 14;12(5):539. doi: 10.3390/vaccines12050539 (PMC11125730; doi:10.3390/vaccines12050539)
Supplement: Supplementary file 1 [file vaccines-12-00539-s001.zip › Supplementary File S3 Spike vs. Human Excel #2.xlsm]

## Sheet: miscellaneous
混ざり蛋白質名(重複あり)	CommmonSCSs数のみ	アミノ酸数	CommonSCSs/1AA	修正版タンパク質名（重複あり）	CommmonSCSs数のみ	アミノ酸数	CommonSCSs/1AA
titin	29	34350		titin	29	34350
titin	29	35991		titin	29	35991
titin	29	33423		titin	29	33423
titin	29	35622		titin	29	35622
titin	29	34088		titin	29	34088
titin	29	34087		titin	29	34087
titin	28	33101		titin	28	33101
titin	28	34138		titin	28	34138
titin	28	34137		titin	28	34137
titin	28	67057		titin	28	67057
titin	28	33062		titin	28	33062
titin	28	33035		titin	28	33035
titin	25	26926		titin	25	26926
titin	25	27051		titin	25	27051
titin	25	27118		titin	25	27118
titin	25	26973		titin	25	26973
titin	25	26956		titin	25	26956
titin	23	23574		titin	23	23574
mucin-16	21	14507		mucin-16	21	14507
mucin-16	21	14257		mucin-16	21	14257
mucin-16	21	14235		mucin-16	21	14235
mucin-16	21	14228		mucin-16	21	14228
mucin-16	21	14217		mucin-16	21	14217
mucin-16	21	14102		mucin-16	21	14102
mucin-16	21	14102		mucin-16	21	14102
mucin-16	21	14101		mucin-16	21	14101
mucin-16	21	14101		mucin-16	21	14101
mucin-16	21	14101		mucin-16	21	14101
mucin-16	21	14101		mucin-16	21	14101
mucin-16	15	11186		mucin-16	15	11186
mucin-16	15	11159		mucin-16	15	11159
inositol 1,4,5-trisphosphate receptor type 2	10	2701		adhesion G-protein coupled receptor V1	10	6306
adhesion G-protein coupled receptor V1	10	6306		adhesion G-protein coupled receptor V1	10	6313
nesprin-1	10	8749		adhesion G-protein coupled receptor V1	10	6312
very large A-kinase anchor protein	10	2970		adhesion G-protein coupled receptor V1	10	6312
fibrous sheath-interacting protein 2	10	6907		adhesion G-protein coupled receptor V1	10	6286
nesprin-1	10	8797		adhesion G-protein coupled receptor V1	10	6281
nesprin-1	10	8846		adhesion G-protein coupled receptor V1	10	6253
nesprin-1	10	8842		adhesion G-protein coupled receptor V1	9	6171
nesprin-1	10	8839		ryanodine receptor 3	9	4870
nesprin-1	10	8832		ryanodine receptor 3	9	4865
nesprin-1	10	8829		ryanodine receptor 3	9	4859
nesprin-1	10	8827		adhesion G-protein coupled receptor V1	9	5002
nesprin-1	10	8823		adhesion G-protein coupled receptor V1	9	4963
nesprin-1	10	8822		nesprin-1	9	8837
nesprin-1	10	8809		nesprin-1	9	8820
nesprin-1	10	8804		ryanodine receptor 3	9	4866
nesprin-1	10	8799		ryanodine receptor 3	9	4865
nesprin-1	10	8795		ryanodine receptor 3	9	4865
nesprin-1	10	8794		ryanodine receptor 3	9	4865
nesprin-1	10	8793		ryanodine receptor 3	9	4864
nesprin-1	10	8758		ryanodine receptor 3	9	4860
nesprin-1	10	8744		ryanodine receptor 3	9	4859
nesprin-1	10	8721		ryanodine receptor 3	9	4837
nesprin-1	10	8845		ryanodine receptor 3	9	4830
nesprin-1	10	8841		ryanodine receptor 3	9	3855
nesprin-1	10	8791		ryanodine receptor 3	9	4864
nesprin-1	10	8271		ryanodine receptor 3	9	4863
nesprin-1	10	8102		protein unc-80 homolog	8	3324
adhesion G-protein coupled receptor V1	10	6313		transmembrane protein KIAA1109	8	5093
adhesion G-protein coupled receptor V1	10	6312		transmembrane protein KIAA1109	8	5005
adhesion G-protein coupled receptor V1	10	6312		protein unc-80 homolog	8	3258
adhesion G-protein coupled receptor V1	10	6286		nesprin-1	8	8749
adhesion G-protein coupled receptor V1	10	6281		protein unc-80 homolog	8	3234
adhesion G-protein coupled receptor V1	10	6253		nesprin-1	8	8797
adhesion G-protein coupled receptor V1	10	6171		protein unc-80 homolog	8	3323
nesprin-1	10	8846		transmembrane protein KIAA1109	8	5026
nesprin-1	10	8846		transmembrane protein KIAA1109	8	5005
nesprin-1	10	8839		transmembrane protein KIAA1109	8	5004
nesprin-1	10	8837		nesprin-1	8	8846
nesprin-1	10	8820		nesprin-1	8	8842
nesprin-1	10	8808		nesprin-1	8	8839
nesprin-1	10	8794		nesprin-1	8	8832
nesprin-1	10	8757		nesprin-1	8	8829
nesprin-1	10	8735		nesprin-1	8	8827
nesprin-1	10	8720		nesprin-1	8	8823
nesprin-1	10	8716		nesprin-1	8	8822
nesprin-1	10	8271		nesprin-1	8	8809
inositol 1,4,5-trisphosphate receptor type 2	10	2721		nesprin-1	8	8804
inositol 1,4,5-trisphosphate receptor type 2	10	2699		nesprin-1	8	8799
ryanodine receptor 3	9	4870		nesprin-1	8	8795
ryanodine receptor 3	9	4865		nesprin-1	8	8794
ryanodine receptor 3	9	4859		nesprin-1	8	8793
adhesion G-protein coupled receptor V1	9	5002		nesprin-1	8	8758
adhesion G-protein coupled receptor V1	9	4963		nesprin-1	8	8744
adhesion G-protein coupled receptor V1	9	3597		nesprin-1	8	8721
ryanodine receptor 3	9	4866		protein unc-80 homolog	8	3338
ryanodine receptor 3	9	4865		protein unc-80 homolog	8	3337
ryanodine receptor 3	9	4865		protein unc-80 homolog	8	3336
ryanodine receptor 3	9	4865		protein unc-80 homolog	8	3326
ryanodine receptor 3	9	4864		protein unc-80 homolog	8	3319
ryanodine receptor 3	9	4860		transmembrane protein KIAA1109	8	5093
ryanodine receptor 3	9	4859		transmembrane protein KIAA1109	8	5093
ryanodine receptor 3	9	4837		transmembrane protein KIAA1109	8	5092
ryanodine receptor 3	9	4830		transmembrane protein KIAA1109	8	5076
ryanodine receptor 3	9	3855		transmembrane protein KIAA1109	8	5072
ryanodine receptor 3	9	4864		transmembrane protein KIAA1109	8	5058
ryanodine receptor 3	9	4863		transmembrane protein KIAA1109	8	5050
E3 ubiquitin-protein ligase RNF213	8	5207		transmembrane protein KIAA1109	8	5043
putative maltase-glucoamylase-like protein FLJ16351	8	2515		transmembrane protein KIAA1109	8	4510
protein AHNAK2	8	5695		nesprin-1	8	8845
protein unc-80 homolog	8	3324		nesprin-1	8	8841
transmembrane protein KIAA1109	8	5093		nesprin-1	8	8791
serine/threonine-protein kinase SMG1	8	3661		nesprin-1	8	8271
transmembrane protein KIAA1109	8	5005		nesprin-1	8	8102
protein unc-80 homolog	8	3258		protein unc-80 homolog	8	3333
protein AHNAK2	8	5795		protein unc-80 homolog	8	3296
protein unc-80 homolog	8	3234		protein unc-80 homolog	8	3270
protein unc-80 homolog	8	3323		protein unc-80 homolog	8	3256
serine/threonine-protein kinase SMG1	8	3689		protein unc-80 homolog	8	3255
serine/threonine-protein kinase SMG1	8	3663		protein unc-80 homolog	8	3251
serine/threonine-protein kinase SMG1	8	3637		protein unc-80 homolog	8	3220
E3 ubiquitin-protein ligase RNF213	8	5256		transmembrane protein KIAA1109	8	4991
E3 ubiquitin-protein ligase RNF213	8	5256		transmembrane protein KIAA1109	8	4974
transmembrane protein KIAA1109	8	5026		transmembrane protein KIAA1109	8	4970
transmembrane protein KIAA1109	8	5005		nesprin-1	8	8846
transmembrane protein KIAA1109	8	5004		nesprin-1	8	8846
E3 ubiquitin-protein ligase RNF213	8	5256		nesprin-1	8	8839
protein unc-80 homolog	8	3338		nesprin-1	8	8808
protein unc-80 homolog	8	3337		nesprin-1	8	8794
protein unc-80 homolog	8	3336		nesprin-1	8	8757
protein unc-80 homolog	8	3326		nesprin-1	8	8735
protein unc-80 homolog	8	3319		nesprin-1	8	8720
E3 ubiquitin-protein ligase RNF213	8	4825		nesprin-1	8	8716
transmembrane protein KIAA1109	8	5093		nesprin-1	8	8271
transmembrane protein KIAA1109	8	5093		transmembrane protein KIAA1109	8	4477
transmembrane protein KIAA1109	8	5092		thyroid adenoma-associated protein	7	1953
transmembrane protein KIAA1109	8	5076		unconventional myosin-XVI	7	1880
transmembrane protein KIAA1109	8	5072		thyroid adenoma-associated protein	7	1952
transmembrane protein KIAA1109	8	5058		thyroid adenoma-associated protein	7	1953
transmembrane protein KIAA1109	8	5050		cytoplasmic dynein 1 heavy chain 1	7	4646
transmembrane protein KIAA1109	8	5043		inositol 1,4,5-trisphosphate receptor type 2	7	2701
transmembrane protein KIAA1109	8	4510		unconventional myosin-XVI	7	1858
serine/threonine-protein kinase SMG1	8	3688		thyroid adenoma-associated protein	7	1953
protein unc-80 homolog	8	3333		histone-lysine N-methyltransferase 2C	7	4911
protein unc-80 homolog	8	3296		mucin-19	7	8384
protein unc-80 homolog	8	3270		histone-lysine N-methyltransferase 2C	7	4983
protein unc-80 homolog	8	3256		histone-lysine N-methyltransferase 2C	7	4982
protein unc-80 homolog	8	3255		histone-lysine N-methyltransferase 2C	7	4982
protein unc-80 homolog	8	3251		histone-lysine N-methyltransferase 2C	7	4979
protein unc-80 homolog	8	3220		histone-lysine N-methyltransferase 2C	7	4928
transmembrane protein KIAA1109	8	4991		thyroid adenoma-associated protein	7	1909
transmembrane protein KIAA1109	8	4974		thyroid adenoma-associated protein	7	1879
transmembrane protein KIAA1109	8	4970		thyroid adenoma-associated protein	7	1453
serine/threonine-protein kinase SMG1	8	3663		histone-lysine N-methyltransferase 2C	7	4982
E3 ubiquitin-protein ligase RNF213	8	4921		histone-lysine N-methyltransferase 2C	7	4959
protein AHNAK2	8	5695		histone-lysine N-methyltransferase 2C	7	4927
serine/threonine-protein kinase SMG1	8	3611		histone-lysine N-methyltransferase 2C	7	4967
serine/threonine-protein kinase SMG1	8	3611		histone-lysine N-methyltransferase 2C	7	4943
transmembrane protein KIAA1109	8	4477		histone-lysine N-methyltransferase 2C	7	4932
thyroid adenoma-associated protein	7	1953		histone-lysine N-methyltransferase 2C	7	4904
obscurin	7	7968		histone-lysine N-methyltransferase 2C	7	4678
unconventional myosin-XVI	7	1880		histone-lysine N-methyltransferase 2C	7	4963
obscurin	7	8923		unconventional myosin-XVI	7	1858
thyroid adenoma-associated protein	7	1952		thyroid adenoma-associated protein	7	1284
thyroid adenoma-associated protein	7	1953		protein unc-80 homolog	7	2499
unconventional myosin-XVIIIa	7	2058		adhesion G-protein coupled receptor V1	7	4019
unconventional myosin-XVIIIa	7	2051		adhesion G-protein coupled receptor V1	7	4012
unconventional myosin-XVIIIa	7	2002		histone-lysine N-methyltransferase 2C	7	4983
cytoplasmic dynein 1 heavy chain 1	7	4646		histone-lysine N-methyltransferase 2C	7	4982
obscurin	7	8925		histone-lysine N-methyltransferase 2C	7	4978
unconventional myosin-XVI	7	1858		histone-lysine N-methyltransferase 2C	7	4978
vacuolar protein sorting-associated protein 13D	7	4388		histone-lysine N-methyltransferase 2C	7	4972
vacuolar protein sorting-associated protein 13D	7	4363		histone-lysine N-methyltransferase 2C	7	4966
thyroid adenoma-associated protein	7	1953		histone-lysine N-methyltransferase 2C	7	4954
E3 ubiquitin-protein ligase HUWE1	7	4374		histone-lysine N-methyltransferase 2C	7	4934
unconventional myosin-XVIIIa	7	2054		histone-lysine N-methyltransferase 2C	7	4922
histone-lysine N-methyltransferase 2C	7	4911		inositol 1,4,5-trisphosphate receptor type 2	7	2721
mucin-19	7	8384		inositol 1,4,5-trisphosphate receptor type 2	7	2699
unconventional myosin-XVIIIa	7	2039		histone-lysine N-methyltransferase 2C	7	4982
histone-lysine N-methyltransferase 2C	7	4983		histone-lysine N-methyltransferase 2C	7	4958
histone-lysine N-methyltransferase 2C	7	4982		ryanodine receptor 1	6	5038
histone-lysine N-methyltransferase 2C	7	4982		ryanodine receptor 2	6	4967
histone-lysine N-methyltransferase 2C	7	4979		ryanodine receptor 1	6	5033
histone-lysine N-methyltransferase 2C	7	4928		KAT8 regulatory NSL complex subunit 1	6	1104
E3 ubiquitin-protein ligase HUWE1	7	4374		KAT8 regulatory NSL complex subunit 1	6	1105
thyroid adenoma-associated protein	7	1909		protocadherin Fat 4	6	4982
thyroid adenoma-associated protein	7	1879		protocadherin Fat 4	6	4983
thyroid adenoma-associated protein	7	1453		basement membrane-specific heparan sulfate proteoglycan core protein	6	4392
histone-lysine N-methyltransferase 2C	7	4982		unconventional myosin-XVIIIa	6	2058
histone-lysine N-methyltransferase 2C	7	4959		unconventional myosin-XVIIIa	6	2051
histone-lysine N-methyltransferase 2C	7	4927		unconventional myosin-XVIIIa	6	2002
histone-lysine N-methyltransferase 2C	7	4967		KAT8 regulatory NSL complex subunit 1	6	1105
histone-lysine N-methyltransferase 2C	7	4943		huntingtin	6	3144
histone-lysine N-methyltransferase 2C	7	4932		probable ubiquitin carboxyl-terminal hydrolase FAF-Y	6	2555
histone-lysine N-methyltransferase 2C	7	4904		basement membrane-specific heparan sulfate proteoglycan core protein	6	4391
histone-lysine N-methyltransferase 2C	7	4678		helicase SRCAP	6	3230
histone-lysine N-methyltransferase 2C	7	4963		zinc finger homeobox protein 3	6	3703
putative maltase-glucoamylase-like protein FLJ16351	7	2245		nesprin-2	6	6885
putative maltase-glucoamylase-like protein FLJ16351	7	1660		KAT8 regulatory NSL complex subunit 1	6	1105
putative maltase-glucoamylase-like protein FLJ16351	7	1277		retroelement silencing factor 1	6	1747
unconventional myosin-XVI	7	1858		protocadherin Fat 4	6	4981
E3 ubiquitin-protein ligase HUWE1	7	4457		E3 ubiquitin-protein ligase HUWE1	6	4374
E3 ubiquitin-protein ligase HUWE1	7	4457		unconventional myosin-XVIIIa	6	2054
thyroid adenoma-associated protein	7	1284		fibrous sheath-interacting protein 2	6	6907
serine/threonine-protein kinase SMG1	7	3059		NLR family CARD domain-containing protein 3	6	1065
protein unc-80 homolog	7	2499		nesprin-2	6	6907
adhesion G-protein coupled receptor V1	7	4019		unconventional myosin-XVIIIa	6	2039
adhesion G-protein coupled receptor V1	7	4012		retroelement silencing factor 1	6	1747
histone-lysine N-methyltransferase 2C	7	4983		zinc finger homeobox protein 3	6	3702
histone-lysine N-methyltransferase 2C	7	4982		E3 ubiquitin-protein ligase HUWE1	6	4374
histone-lysine N-methyltransferase 2C	7	4978		nesprin-2	6	6922
histone-lysine N-methyltransferase 2C	7	4978		nesprin-2	6	6921
histone-lysine N-methyltransferase 2C	7	4972		nesprin-2	6	6908
histone-lysine N-methyltransferase 2C	7	4966		nesprin-2	6	6899
histone-lysine N-methyltransferase 2C	7	4954		nesprin-2	6	6884
histone-lysine N-methyltransferase 2C	7	4934		ryanodine receptor 2	6	4985
histone-lysine N-methyltransferase 2C	7	4922		ryanodine receptor 2	6	4984
inositol 1,4,5-trisphosphate receptor type 2	7	1733		ryanodine receptor 2	6	4977
serine/threonine-protein kinase SMG1	7	3059		ryanodine receptor 2	6	4975
E3 ubiquitin-protein ligase HUWE1	7	4501		ryanodine receptor 2	6	4973
E3 ubiquitin-protein ligase HUWE1	7	4500		ryanodine receptor 2	6	4965
E3 ubiquitin-protein ligase HUWE1	7	4494		ryanodine receptor 2	6	4954
E3 ubiquitin-protein ligase HUWE1	7	4486		thyroid adenoma-associated protein	6	1832
E3 ubiquitin-protein ligase HUWE1	7	4485		thyroid adenoma-associated protein	6	1831
E3 ubiquitin-protein ligase HUWE1	7	4484		KAT8 regulatory NSL complex subunit 1	6	1105
E3 ubiquitin-protein ligase HUWE1	7	4468		ryanodine receptor 1	6	5032
E3 ubiquitin-protein ligase HUWE1	7	4464		ryanodine receptor 1	6	5027
E3 ubiquitin-protein ligase HUWE1	7	4464		protein unc-80 homolog	6	2691
E3 ubiquitin-protein ligase HUWE1	7	4464		retroelement silencing factor 1	6	1747
E3 ubiquitin-protein ligase HUWE1	7	4464		KAT8 regulatory NSL complex subunit 1	6	1104
E3 ubiquitin-protein ligase HUWE1	7	4464		KAT8 regulatory NSL complex subunit 1	6	1042
E3 ubiquitin-protein ligase HUWE1	7	4464		KAT8 regulatory NSL complex subunit 1	6	1041
E3 ubiquitin-protein ligase HUWE1	7	4418		ryanodine receptor 1	6	5009
histone-lysine N-methyltransferase 2C	7	4982		E3 ubiquitin-protein ligase HUWE1	6	4457
histone-lysine N-methyltransferase 2C	7	4958		E3 ubiquitin-protein ligase HUWE1	6	4457
E3 ubiquitin-protein ligase HUWE1	7	4457		nesprin-2	6	6936
dystrophin	6	3677		nesprin-2	6	6936
collagen alpha-1(XVII) chain	6	1497		nesprin-2	6	6936
ryanodine receptor 1	6	5038		nesprin-2	6	6936
ryanodine receptor 2	6	4967		nesprin-2	6	6935
ryanodine receptor 1	6	5033		nesprin-2	6	6922
E3 ubiquitin-protein ligase LNX	6	728		nesprin-2	6	6921
KAT8 regulatory NSL complex subunit 1	6	1104		nesprin-2	6	6913
KAT8 regulatory NSL complex subunit 1	6	1105		nesprin-2	6	6897
histone-lysine N-methyltransferase 2A	6	3972		E3 ubiquitin-protein ligase UBR4	6	5272
1-phosphatidylinositol 4,5-bisphosphate phosphodiesterase epsilon-1	6	2286		E3 ubiquitin-protein ligase UBR4	6	5271
protocadherin Fat 4	6	4982		E3 ubiquitin-protein ligase UBR4	6	5271
protocadherin Fat 4	6	4983		E3 ubiquitin-protein ligase UBR4	6	5271
basement membrane-specific heparan sulfate proteoglycan core protein	6	4392		E3 ubiquitin-protein ligase UBR4	6	5267
cilia- and flagella-associated protein 47	6	3187		E3 ubiquitin-protein ligase UBR4	6	5266
unconventional myosin-XVIIIa	6	1581		E3 ubiquitin-protein ligase UBR4	6	5261
dystonin	6	7794		E3 ubiquitin-protein ligase UBR4	6	5244
dystonin	6	7461		E3 ubiquitin-protein ligase UBR4	6	5243
dystonin	6	7803		E3 ubiquitin-protein ligase UBR4	6	5232
dystonin	6	7818		basement membrane-specific heparan sulfate proteoglycan core protein	6	4574
KAT8 regulatory NSL complex subunit 1	6	1105		E3 ubiquitin-protein ligase UBR4	6	5256
huntingtin	6	3144		E3 ubiquitin-protein ligase UBR4	6	5233
histone-lysine N-methyltransferase 2D	6	5537		basement membrane-specific heparan sulfate proteoglycan core protein	6	4456
dystrophin	6	3685		basement membrane-specific heparan sulfate proteoglycan core protein	6	4439
dystrophin	6	3681		basement membrane-specific heparan sulfate proteoglycan core protein	6	4438
dystrophin	6	3562		ryanodine receptor 2	6	4978
dystrophin	6	2344		protein unc-80 homolog	6	2247
dystrophin	6	2341		protein unc-80 homolog	6	2066
probable ubiquitin carboxyl-terminal hydrolase FAF-Y	6	2555		adhesion G-protein coupled receptor V1	6	3597
basement membrane-specific heparan sulfate proteoglycan core protein	6	4391		histone-lysine N-methyltransferase 2C	6	3873
histone-lysine N-methyltransferase 2A	6	3969		histone-lysine N-methyltransferase 2C	6	3741
helicase SRCAP	6	3230		retroelement silencing factor 1	6	1747
zinc finger homeobox protein 3	6	3703		nesprin-2	6	6936
protein PRRC2C	6	2817		nesprin-2	6	6913
nesprin-2	6	6885		NLR family CARD domain-containing protein 3	6	1074
KAT8 regulatory NSL complex subunit 1	6	1105		NLR family CARD domain-containing protein 3	6	1074
1-phosphatidylinositol 4,5-bisphosphate phosphodiesterase epsilon-1	6	2302		NLR family CARD domain-containing protein 3	6	1074
retroelement silencing factor 1	6	1747		NLR family CARD domain-containing protein 3	6	1074
protocadherin Fat 4	6	4981		NLR family CARD domain-containing protein 3	6	1074
extracellular matrix protein FRAS1	6	4012		NLR family CARD domain-containing protein 3	6	1074
E3 ubiquitin-protein ligase LNX	6	632		NLR family CARD domain-containing protein 3	6	1074
obscurin	6	6620		NLR family CARD domain-containing protein 3	6	1074
ATP-binding cassette sub-family A member 13	6	5058		NLR family CARD domain-containing protein 3	6	1074
NLR family CARD domain-containing protein 3	6	1065		KAT8 regulatory NSL complex subunit 1	6	1041
nesprin-2	6	6907		E3 ubiquitin-protein ligase HUWE1	6	4501
protein PRRC2C	6	2903		E3 ubiquitin-protein ligase HUWE1	6	4500
protein PRRC2C	6	2901		E3 ubiquitin-protein ligase HUWE1	6	4494
protein PRRC2C	6	2898		E3 ubiquitin-protein ligase HUWE1	6	4486
protein PRRC2C	6	2898		E3 ubiquitin-protein ligase HUWE1	6	4485
protein PRRC2C	6	2869		E3 ubiquitin-protein ligase HUWE1	6	4484
protein PRRC2C	6	2858		E3 ubiquitin-protein ligase HUWE1	6	4468
protein PRRC2C	6	2824		E3 ubiquitin-protein ligase HUWE1	6	4464
protein PRRC2C	6	2819		E3 ubiquitin-protein ligase HUWE1	6	4464
protein PRRC2C	6	2779		E3 ubiquitin-protein ligase HUWE1	6	4464
protein PRRC2C	6	2774		E3 ubiquitin-protein ligase HUWE1	6	4464
very large A-kinase anchor protein	6	2679		E3 ubiquitin-protein ligase HUWE1	6	4464
dystonin	6	7785		E3 ubiquitin-protein ligase HUWE1	6	4464
dystonin	6	7723		E3 ubiquitin-protein ligase HUWE1	6	4418
dystonin	6	7680		probable ubiquitin carboxyl-terminal hydrolase FAF-Y	6	2560
dystonin	6	7647		E3 ubiquitin-protein ligase HUWE1	6	4457
dystonin	6	7640		neurofibromin	5	2818
dystonin	6	7633		apolipoprotein B-100	5	4563
dystonin	6	7607		amiloride-sensitive sodium channel subunit alpha	5	669
dystonin	6	7281		nck-associated protein 5-like	5	1334
retroelement silencing factor 1	6	1747		arf-GAP with Rho-GAP domain, ANK repeat and PH domain-containing protein 1	5	1450
zinc finger homeobox protein 3	6	3702		neurofibromin	5	2839
E3 ubiquitin-protein ligase LNX	6	728		homeodomain-interacting protein kinase 3	5	1194
nesprin-2	6	6922		histone-lysine N-methyltransferase SETD5	5	1442
nesprin-2	6	6921		obscurin	5	7968
nesprin-2	6	6908		teneurin-4	5	2769
nesprin-2	6	6899		TP53-binding protein 1	5	1975
nesprin-2	6	6884		TP53-binding protein 1	5	1977
protein PRRC2C	6	2896		coiled-coil domain-containing protein 168	5	7081
ryanodine receptor 2	6	4985		amiloride-sensitive sodium channel subunit alpha	5	692
ryanodine receptor 2	6	4984		amiloride-sensitive sodium channel subunit alpha	5	728
ryanodine receptor 2	6	4977		rho GTPase-activating protein 7	5	1017
ryanodine receptor 2	6	4975		dyslexia-associated protein KIAA0319	5	1063
ryanodine receptor 2	6	4973		dyslexia-associated protein KIAA0319	5	1072
ryanodine receptor 2	6	4965		dyslexia-associated protein KIAA0319	5	1027
ryanodine receptor 2	6	4954		dyslexia-associated protein KIAA0319	5	1011
thyroid adenoma-associated protein	6	1832		telomere-associated protein RIF1	5	2446
thyroid adenoma-associated protein	6	1831		telomere-associated protein RIF1	5	2446
1-phosphatidylinositol 4,5-bisphosphate phosphodiesterase epsilon-1	6	2316		telomere-associated protein RIF1	5	2446
1-phosphatidylinositol 4,5-bisphosphate phosphodiesterase epsilon-1	6	2315		histone-lysine N-methyltransferase 2A	5	3972
1-phosphatidylinositol 4,5-bisphosphate phosphodiesterase epsilon-1	6	2300		transformation/transcription domain-associated protein	5	3859
retroelement silencing factor 1	6	1676		neural cell adhesion molecule L1-like protein	5	1208
histone-lysine N-methyltransferase 2D	6	5540		neural cell adhesion molecule L1-like protein	5	1171
histone-lysine N-methyltransferase 2D	6	5536		sodium bicarbonate cotransporter 3	5	1131
E3 ubiquitin-protein ligase MYCBP2	6	4797		sodium bicarbonate cotransporter 3	5	1090
E3 ubiquitin-protein ligase MYCBP2	6	4794		multiple PDZ domain protein	5	2037
E3 ubiquitin-protein ligase MYCBP2	6	4772		multiple PDZ domain protein	5	2008
E3 ubiquitin-protein ligase MYCBP2	6	4763		obscurin	5	8923
E3 ubiquitin-protein ligase MYCBP2	6	4761		otogelin	5	2925
E3 ubiquitin-protein ligase MYCBP2	6	4697		homeodomain-interacting protein kinase 3	5	1194
KAT8 regulatory NSL complex subunit 1	6	1105		homeodomain-interacting protein kinase 3	5	1194
ryanodine receptor 1	6	5032		protein MON2 homolog	5	1675
ryanodine receptor 1	6	5027		protein MON2 homolog	5	1711
dystrophin	6	3703		protein MON2 homolog	5	1688
dystrophin	6	3695		FH1/FH2 domain-containing protein 3	5	1622
dystrophin	6	3690		DNA polymerase zeta catalytic subunit	5	3052
dystrophin	6	3657		DNA polymerase zeta catalytic subunit	5	3052
dystrophin	6	3593		otogelin	5	2913
dystrophin	6	3575		putative maltase-glucoamylase-like protein FLJ16351	5	2515
protein unc-80 homolog	6	2691		pecanex-like protein 1	5	2230
dystonin	6	7794		rho GTPase-activating protein 7	5	1125
ATP-binding cassette sub-family A member 13	6	5059		protein mono-ADP-ribosyltransferase PARP10	5	1037
ATP-binding cassette sub-family A member 13	6	5028		envoplakin	5	2055
ATP-binding cassette sub-family A member 13	6	5028		sodium bicarbonate cotransporter 3	5	1259
ATP-binding cassette sub-family A member 13	6	5013		sodium bicarbonate cotransporter 3	5	1246
ATP-binding cassette sub-family A member 13	6	4950		sodium bicarbonate cotransporter 3	5	1210
ATP-binding cassette sub-family A member 13	6	4602		sodium bicarbonate cotransporter 3	5	1206
retroelement silencing factor 1	6	1747		sodium bicarbonate cotransporter 3	5	1095
KAT8 regulatory NSL complex subunit 1	6	1104		sodium bicarbonate cotransporter 3	5	1135
KAT8 regulatory NSL complex subunit 1	6	1042		protein NPAT	5	1434
KAT8 regulatory NSL complex subunit 1	6	1041		multiple PDZ domain protein	5	2070
E3 ubiquitin-protein ligase RNF213	6	4192		thyroid adenoma-associated protein	5	1912
ryanodine receptor 1	6	5009		unconventional myosin-XVIIIa	5	1581
nesprin-2	6	6936		rho GTPase-activating protein 7	5	1528
nesprin-2	6	6936		rho GTPase-activating protein 7	5	1017
nesprin-2	6	6936		rho GTPase-activating protein 7	5	1017
nesprin-2	6	6936		rho GTPase-activating protein 7	5	1017
nesprin-2	6	6935		protein TANC1	5	1738
nesprin-2	6	6922		protein TANC1	5	1854
nesprin-2	6	6921		protein TANC1	5	1854
nesprin-2	6	6913		dyslexia-associated protein KIAA0319	5	1072
nesprin-2	6	6897		dyslexia-associated protein KIAA0319	5	1066
histone-lysine N-methyltransferase 2D	6	5556		dyslexia-associated protein KIAA0319	5	1039
histone-lysine N-methyltransferase 2D	6	5555		dyslexia-associated protein KIAA0319	5	1027
histone-lysine N-methyltransferase 2D	6	5553		dyslexia-associated protein KIAA0319	5	978
histone-lysine N-methyltransferase 2D	6	5552		dyslexia-associated protein KIAA0319	5	978
histone-lysine N-methyltransferase 2D	6	5549		nuclear pore complex protein Nup98-Nup96	5	1817
histone-lysine N-methyltransferase 2D	6	5525		zinc finger protein 469	5	3953
1-phosphatidylinositol 4,5-bisphosphate phosphodiesterase epsilon-1	6	2316		nck-associated protein 5-like	5	1334
E3 ubiquitin-protein ligase UBR4	6	5272		DNA polymerase zeta catalytic subunit	5	3130
E3 ubiquitin-protein ligase UBR4	6	5271		multiple PDZ domain protein	5	2103
E3 ubiquitin-protein ligase UBR4	6	5271		multiple PDZ domain protein	5	2037
E3 ubiquitin-protein ligase UBR4	6	5271		multiple PDZ domain protein	5	2037
E3 ubiquitin-protein ligase UBR4	6	5267		multiple PDZ domain protein	5	2037
E3 ubiquitin-protein ligase UBR4	6	5266		multiple PDZ domain protein	5	2008
E3 ubiquitin-protein ligase UBR4	6	5261		multiple PDZ domain protein	5	2000
E3 ubiquitin-protein ligase UBR4	6	5244		multiple PDZ domain protein	5	2000
E3 ubiquitin-protein ligase UBR4	6	5243		multiple PDZ domain protein	5	2000
E3 ubiquitin-protein ligase UBR4	6	5232		multiple PDZ domain protein	5	2000
basement membrane-specific heparan sulfate proteoglycan core protein	6	4574		multiple PDZ domain protein	5	2000
histone-lysine N-methyltransferase 2A	6	4005		multiple PDZ domain protein	5	1971
histone-lysine N-methyltransferase 2A	6	4004		multiple PDZ domain protein	5	1971
histone-lysine N-methyltransferase 2A	6	4002		transformation/transcription domain-associated protein	5	3873
dystrophin	6	3662		baculoviral IAP repeat-containing protein 6	5	4856
dystrophin	6	3295		multiple PDZ domain protein	5	2070
protein PRRC2C	6	2896		sorbin and SH3 domain-containing protein 1	5	1606
protein PRRC2C	6	2853		sorbin and SH3 domain-containing protein 1	5	1619
protein PRRC2C	6	2790		sorbin and SH3 domain-containing protein 1	5	1584
E3 ubiquitin-protein ligase UBR4	6	5256		sorbin and SH3 domain-containing protein 1	5	1562
E3 ubiquitin-protein ligase UBR4	6	5233		sorbin and SH3 domain-containing protein 1	5	1628
basement membrane-specific heparan sulfate proteoglycan core protein	6	4456		obscurin	5	8925
basement membrane-specific heparan sulfate proteoglycan core protein	6	4439		envoplakin	5	2033
basement membrane-specific heparan sulfate proteoglycan core protein	6	4438		protein NPAT	5	1427
ryanodine receptor 2	6	4978		DNA polymerase zeta catalytic subunit	5	3130
protein unc-80 homolog	6	2247		histone-lysine N-methyltransferase 2D	5	5537
protein unc-80 homolog	6	2066		transformation/transcription domain-associated protein	5	3830
E3 ubiquitin-protein ligase LNX	6	728		sodium bicarbonate cotransporter 3	5	1214
dystonin	6	7827		multiple PDZ domain protein	5	2041
dystonin	6	7821		desmoplakin	5	2871
dystonin	6	7806		reelin	5	3460
dystonin	6	7797		TP53-binding protein 1	5	1972
dystonin	6	7790		homeodomain-interacting protein kinase 3	5	1215
dystonin	6	7766		golgin subfamily A member 3	5	1498
dystonin	6	7749		histone-lysine N-methyltransferase 2A	5	3969
dystonin	6	7718		mucin-3A	5	3323
dystonin	6	7694		rho GTPase-activating protein 7	5	1091
dystonin	6	7681		neural cell adhesion molecule L1-like protein	5	1224
dystonin	6	7657		protein piccolo	5	4935
dystonin	6	7619		dyslexia-associated protein KIAA0319	5	1072
dystonin	6	6016		pecanex-like protein 1	5	2341
histone-lysine N-methyltransferase 2C	6	3873		protein MON2 homolog	5	1717
histone-lysine N-methyltransferase 2C	6	3741		protein PRRC2C	5	2817
1-phosphatidylinositol 4,5-bisphosphate phosphodiesterase epsilon-1	6	2316		structural maintenance of chromosomes flexible hinge domain-containing protein 1	5	2005
1-phosphatidylinositol 4,5-bisphosphate phosphodiesterase epsilon-1	6	2316		baculoviral IAP repeat-containing protein 6	5	4857
phosphatidylinositol phosphatase PTPRQ	6	2536		telomere-associated protein RIF1	5	2472
phosphatidylinositol phosphatase PTPRQ	6	2533		acrosomal protein KIAA1210	5	1709
retroelement silencing factor 1	6	1747		E3 ubiquitin-protein ligase UBR4	5	5183
E3 ubiquitin-protein ligase MYCBP2	6	4778		WD repeat- and FYVE domain-containing protein 4	5	3184
E3 ubiquitin-protein ligase MYCBP2	6	4753		extracellular matrix protein FRAS1	5	4012
E3 ubiquitin-protein ligase MYCBP2	6	4663		protein mono-ADP-ribosyltransferase PARP10	5	1025
nesprin-2	6	6936		protein piccolo	5	5142
nesprin-2	6	6913		protein TANC1	5	1861
NLR family CARD domain-containing protein 3	6	1074		obscurin	5	6620
NLR family CARD domain-containing protein 3	6	1074		VPS10 domain-containing receptor SorCS1	5	1168
NLR family CARD domain-containing protein 3	6	1074		fibrocystin	5	4074
NLR family CARD domain-containing protein 3	6	1074		ATP-binding cassette sub-family A member 13	5	5058
NLR family CARD domain-containing protein 3	6	1074		fibrocystin	5	3396
NLR family CARD domain-containing protein 3	6	1074		reelin	5	3458
NLR family CARD domain-containing protein 3	6	1074		dynein heavy chain 17, axonemal	5	4462
NLR family CARD domain-containing protein 3	6	1074		rho GTPase-activating protein 7	5	1528
NLR family CARD domain-containing protein 3	6	1074		usherin	5	5202
KAT8 regulatory NSL complex subunit 1	6	1041		FRAS1-related extracellular matrix protein 2	5	3169
E3 ubiquitin-protein ligase HUWE1	6	4367		protein PRRC2C	5	2903
dystrophin	6	3672		protein PRRC2C	5	2901
probable ubiquitin carboxyl-terminal hydrolase FAF-Y	6	2560		protein PRRC2C	5	2898
dystonin	6	7600		protein PRRC2C	5	2898
E3 ubiquitin-protein ligase LNX	6	728		protein PRRC2C	5	2869
E3 ubiquitin-protein ligase LNX	6	728		protein PRRC2C	5	2858
ankyrin-1	5	1880		protein PRRC2C	5	2824
neurofibromin	5	2818		protein PRRC2C	5	2819
polycystin-1	5	4302		protein PRRC2C	5	2779
apolipoprotein B-100	5	4563		protein PRRC2C	5	2774
polycystin-1	5	4303		telomere-associated protein RIF1	5	2472
amiloride-sensitive sodium channel subunit alpha	5	669		protein TANC1	5	1871
nck-associated protein 5-like	5	1334		homeodomain-interacting protein kinase 3	5	1215
arf-GAP with Rho-GAP domain, ANK repeat and PH domain-containing protein 1	5	1450		MAX gene-associated protein	5	3115
neurofibromin	5	2839		MAX gene-associated protein	5	3115
homeodomain-interacting protein kinase 3	5	1194		MAX gene-associated protein	5	3115
histone-lysine N-methyltransferase SETD5	5	1442		MAX gene-associated protein	5	3115
teneurin-4	5	2769		MAX gene-associated protein	5	3115
TP53-binding protein 1	5	1975		MAX gene-associated protein	5	3114
TP53-binding protein 1	5	1977		MAX gene-associated protein	5	2906
ankyrin-1	5	1897		FH1/FH2 domain-containing protein 3	5	1559
SLIT and NTRK-like protein 2	5	845		baculoviral IAP repeat-containing protein 6	5	4880
SLIT and NTRK-like protein 2	5	845		baculoviral IAP repeat-containing protein 6	5	4875
SLIT and NTRK-like protein 2	5	845		baculoviral IAP repeat-containing protein 6	5	4870
SLIT and NTRK-like protein 2	5	845		baculoviral IAP repeat-containing protein 6	5	4861
SLIT and NTRK-like protein 2	5	845		baculoviral IAP repeat-containing protein 6	5	4847
SLIT and NTRK-like protein 2	5	845		baculoviral IAP repeat-containing protein 6	5	4840
SLIT and NTRK-like protein 2	5	845		histone-lysine N-methyltransferase SETD5	5	1461
NHS-like protein 1	5	1606		sodium bicarbonate cotransporter 3	5	1126
coiled-coil domain-containing protein 168	5	7081		sodium bicarbonate cotransporter 3	5	1113
amiloride-sensitive sodium channel subunit alpha	5	692		golgin subfamily A member 3	5	1458
amiloride-sensitive sodium channel subunit alpha	5	728		golgin subfamily A member 3	5	1307
rho GTPase-activating protein 7	5	1017		pecanex-like protein 1	5	2349
apoptotic chromatin condensation inducer in the nucleus	5	1301		pecanex-like protein 1	5	2348
dyslexia-associated protein KIAA0319	5	1063		pecanex-like protein 1	5	2344
dyslexia-associated protein KIAA0319	5	1072		pecanex-like protein 1	5	2336
dyslexia-associated protein KIAA0319	5	1027		pecanex-like protein 1	5	2312
dyslexia-associated protein KIAA0319	5	1011		pecanex-like protein 1	5	2243
telomere-associated protein RIF1	5	2446		WD repeat- and FYVE domain-containing protein 4	5	3184
telomere-associated protein RIF1	5	2446		rho GTPase-activating protein 7	5	1528
telomere-associated protein RIF1	5	2446		protein PRRC2C	5	2896
partitioning defective 3 homolog	5	1353		ryanodine receptor 2	5	4906
partitioning defective 3 homolog	5	1340		baculoviral IAP repeat-containing protein 6	5	4878
partitioning defective 3 homolog	5	1319		baculoviral IAP repeat-containing protein 6	5	4864
partitioning defective 3 homolog	5	1310		baculoviral IAP repeat-containing protein 6	5	4851
partitioning defective 3 homolog	5	1273		thyroid adenoma-associated protein	5	1913
partitioning defective 3 homolog	5	1266		protein TANC1	5	1861
partitioning defective 3 homolog	5	1244		protein TANC1	5	1826
partitioning defective 3 homolog	5	1031		neural cell adhesion molecule L1-like protein	5	1224
partitioning defective 3 homolog	5	1000		neural cell adhesion molecule L1-like protein	5	1224
partitioning defective 3 homolog	5	988		neural cell adhesion molecule L1-like protein	5	1224
dedicator of cytokinesis protein 8	5	1999		sodium bicarbonate cotransporter 3	5	1255
dedicator of cytokinesis protein 8	5	2031		multiple PDZ domain protein	5	2070
Golgi-specific brefeldin A-resistance guanine nucleotide exchange factor 1	5	1856		multiple PDZ domain protein	5	2070
Golgi-specific brefeldin A-resistance guanine nucleotide exchange factor 1	5	1855		multiple PDZ domain protein	5	2041
transformation/transcription domain-associated protein	5	3859		retroelement silencing factor 1	5	1676
neural cell adhesion molecule L1-like protein	5	1208		nck-associated protein 5-like	5	1334
neural cell adhesion molecule L1-like protein	5	1171		histone-lysine N-methyltransferase 2D	5	5540
sodium bicarbonate cotransporter 3	5	1131		histone-lysine N-methyltransferase 2D	5	5536
sodium bicarbonate cotransporter 3	5	1090		golgin subfamily A member 3	5	1498
multiple PDZ domain protein	5	2037		golgin subfamily A member 3	5	1498
multiple PDZ domain protein	5	2008		E3 ubiquitin-protein ligase MYCBP2	5	4797
dynein heavy chain 11, axonemal	5	4516		E3 ubiquitin-protein ligase MYCBP2	5	4794
otogelin	5	2925		E3 ubiquitin-protein ligase MYCBP2	5	4772
homeodomain-interacting protein kinase 3	5	1194		E3 ubiquitin-protein ligase MYCBP2	5	4763
homeodomain-interacting protein kinase 3	5	1194		E3 ubiquitin-protein ligase MYCBP2	5	4761
protein MON2 homolog	5	1675		E3 ubiquitin-protein ligase MYCBP2	5	4697
protein MON2 homolog	5	1711		pecanex-like protein 1	5	1423
protein MON2 homolog	5	1688		MAX gene-associated protein	5	3115
protocadherin-11 Y-linked	5	1037		protein unc-80 homolog	5	1950
FH1/FH2 domain-containing protein 3	5	1622		protein TANC1	5	1885
general transcription factor 3C polypeptide 1	5	2084		protein TANC1	5	1879
DNA polymerase zeta catalytic subunit	5	3052		protein TANC1	5	1879
DNA polymerase zeta catalytic subunit	5	3052		protein TANC1	5	1853
dmX-like protein 1	5	3048		protein TANC1	5	1697
WD repeat-containing protein 87	5	2912		fibrocystin	5	4074
otogelin	5	2913		fibrocystin	5	4028
pecanex-like protein 1	5	2230		fibrocystin	5	3860
rho GTPase-activating protein 7	5	1125		fibrocystin	5	3416
matrilin-2	5	915		fibrocystin	5	3402
protein mono-ADP-ribosyltransferase PARP10	5	1037		fibrocystin	5	3395
envoplakin	5	2055		dyslexia-associated protein KIAA0319	5	1027
sodium bicarbonate cotransporter 3	5	1259		ATP-binding cassette sub-family A member 13	5	5059
sodium bicarbonate cotransporter 3	5	1246		ATP-binding cassette sub-family A member 13	5	5028
sodium bicarbonate cotransporter 3	5	1210		ATP-binding cassette sub-family A member 13	5	5028
sodium bicarbonate cotransporter 3	5	1206		ATP-binding cassette sub-family A member 13	5	5013
sodium bicarbonate cotransporter 3	5	1095		ATP-binding cassette sub-family A member 13	5	4950
sodium bicarbonate cotransporter 3	5	1135		ATP-binding cassette sub-family A member 13	5	4602
protein NPAT	5	1434		protein mono-ADP-ribosyltransferase PARP10	5	1016
multiple PDZ domain protein	5	2070		coiled-coil domain-containing protein 168	5	7041
thyroid adenoma-associated protein	5	1912		MAX gene-associated protein	5	3005
rho GTPase-activating protein 7	5	1528		MAX gene-associated protein	5	3004
rho GTPase-activating protein 7	5	1017		TP53-binding protein 1	5	1927
rho GTPase-activating protein 7	5	1017		TP53-binding protein 1	5	1700
rho GTPase-activating protein 7	5	1017		KAT8 regulatory NSL complex subunit 1	5	1071
dmX-like protein 1	5	3048		dynein heavy chain 17, axonemal	5	4466
protein TANC1	5	1738		structural maintenance of chromosomes flexible hinge domain-containing protein 1	5	2067
protein TANC1	5	1854		structural maintenance of chromosomes flexible hinge domain-containing protein 1	5	2004
protein TANC1	5	1854		FH1/FH2 domain-containing protein 3	5	1642
dyslexia-associated protein KIAA0319	5	1072		FH1/FH2 domain-containing protein 3	5	1634
dyslexia-associated protein KIAA0319	5	1066		FH1/FH2 domain-containing protein 3	5	1617
dyslexia-associated protein KIAA0319	5	1039		FH1/FH2 domain-containing protein 3	5	1615
dyslexia-associated protein KIAA0319	5	1027		FH1/FH2 domain-containing protein 3	5	1543
dyslexia-associated protein KIAA0319	5	978		FH1/FH2 domain-containing protein 3	5	1609
dyslexia-associated protein KIAA0319	5	978		neural cell adhesion molecule L1-like protein	5	1224
microtubule-associated protein 2	5	1823		neural cell adhesion molecule L1-like protein	5	1208
microtubule-associated protein 2	5	1823		neural cell adhesion molecule L1-like protein	5	1208
nuclear pore complex protein Nup98-Nup96	5	1817		neural cell adhesion molecule L1-like protein	5	1171
maltase-glucoamylase, intestinal	5	2753		histone-lysine N-methyltransferase SETD5	5	1493
zinc finger protein 469	5	3953		histone-lysine N-methyltransferase SETD5	5	1474
doublecortin domain-containing protein 1	5	1783		sodium bicarbonate cotransporter 3	5	1250
nck-associated protein 5-like	5	1334		sodium bicarbonate cotransporter 3	5	1223
homeodomain-interacting protein kinase 1	5	1210		sodium bicarbonate cotransporter 3	5	1201
homeodomain-interacting protein kinase 1	5	1209		sodium bicarbonate cotransporter 3	5	1122
putative uncharacterized protein LOC400499	5	3320		sodium bicarbonate cotransporter 3	5	1099
DNA polymerase zeta catalytic subunit	5	3130		golgin subfamily A member 3	5	1407
multiple PDZ domain protein	5	2103		E3 ubiquitin-protein ligase MYCBP2	5	4688
multiple PDZ domain protein	5	2037		E3 ubiquitin-protein ligase MYCBP2	5	3842
multiple PDZ domain protein	5	2037		DNA polymerase zeta catalytic subunit	5	3157
multiple PDZ domain protein	5	2037		DNA polymerase zeta catalytic subunit	5	3156
multiple PDZ domain protein	5	2008		DNA polymerase zeta catalytic subunit	5	3131
multiple PDZ domain protein	5	2000		DNA polymerase zeta catalytic subunit	5	3079
multiple PDZ domain protein	5	2000		DNA polymerase zeta catalytic subunit	5	3079
multiple PDZ domain protein	5	2000		nck-associated protein 5-like	5	1334
multiple PDZ domain protein	5	2000		histone-lysine N-methyltransferase 2D	5	5556
multiple PDZ domain protein	5	2000		histone-lysine N-methyltransferase 2D	5	5555
multiple PDZ domain protein	5	1971		histone-lysine N-methyltransferase 2D	5	5553
multiple PDZ domain protein	5	1971		histone-lysine N-methyltransferase 2D	5	5552
microtubule-associated protein 2	5	1690		histone-lysine N-methyltransferase 2D	5	5549
microtubule-associated protein 2	5	1909		histone-lysine N-methyltransferase 2D	5	5525
microtubule-associated protein 2	5	1826		WD repeat- and FYVE domain-containing protein 4	5	3224
microtubule-associated protein 2	5	1903		WD repeat- and FYVE domain-containing protein 4	5	3217
microtubule-associated protein 2	5	1915		WD repeat- and FYVE domain-containing protein 4	5	3184
microtubule-associated protein 2	5	1827		E3 ubiquitin-protein ligase UBR4	5	5266
microtubule-associated protein 2	5	1826		E3 ubiquitin-protein ligase UBR4	5	5264
microtubule-associated protein 2	5	1822		E3 ubiquitin-protein ligase UBR4	5	5231
transformation/transcription domain-associated protein	5	3873		E3 ubiquitin-protein ligase UBR4	5	5220
microtubule-associated protein 2	5	1827		histone-lysine N-methyltransferase 2A	5	4005
microtubule-associated protein 2	5	1826		histone-lysine N-methyltransferase 2A	5	4004
microtubule-associated protein 2	5	1823		histone-lysine N-methyltransferase 2A	5	4002
microtubule-associated protein 2	5	1908		protein NPAT	5	1436
microtubule-associated protein 2	5	1827		teneurin-4	5	1917
microtubule-associated protein 2	5	1909		protein PRRC2C	5	2896
microtubule-associated protein 2	5	1905		protein PRRC2C	5	2853
microtubule-associated protein 2	5	1826		protein PRRC2C	5	2790
microtubule-associated protein 2	5	1826		E3 ubiquitin-protein ligase UBR4	5	5265
microtubule-associated protein 2	5	1822		E3 ubiquitin-protein ligase UBR4	5	5238
microtubule-associated protein 2	5	1822		E3 ubiquitin-protein ligase UBR4	5	5232
microtubule-associated protein 2	5	1822		E3 ubiquitin-protein ligase UBR4	5	5227
microtubule-associated protein 2	5	1669		E3 ubiquitin-protein ligase UBR4	5	5219
microtubule-associated protein 2	5	1669		E3 ubiquitin-protein ligase UBR4	5	5203
microtubule-associated protein 2	5	1700		E3 ubiquitin-protein ligase UBR4	5	5186
microtubule-associated protein 2	5	1669		protein phosphatase 1 regulatory subunit 12B	5	1059
microtubule-associated protein 2	5	1669		protein phosphatase 1 regulatory subunit 12B	5	1058
microtubule-associated protein 2	5	1668		protein phosphatase 1 regulatory subunit 12B	5	998
microtubule-associated protein 2	5	1668		protein phosphatase 1 regulatory subunit 12B	5	997
Golgi-specific brefeldin A-resistance guanine nucleotide exchange factor 1	5	1860		telomere-associated protein RIF1	5	2464
Golgi-specific brefeldin A-resistance guanine nucleotide exchange factor 1	5	1843		telomere-associated protein RIF1	5	2441
Golgi-specific brefeldin A-resistance guanine nucleotide exchange factor 1	5	1761		telomere-associated protein RIF1	5	2436
Golgi-specific brefeldin A-resistance guanine nucleotide exchange factor 1	5	1757		telomere-associated protein RIF1	5	2433
Golgi-specific brefeldin A-resistance guanine nucleotide exchange factor 1	5	1859		baculoviral IAP repeat-containing protein 6	5	4858
baculoviral IAP repeat-containing protein 6	5	4856		baculoviral IAP repeat-containing protein 6	5	4847
multiple PDZ domain protein	5	2070		baculoviral IAP repeat-containing protein 6	5	4837
sorbin and SH3 domain-containing protein 1	5	1606		baculoviral IAP repeat-containing protein 6	5	4715
sorbin and SH3 domain-containing protein 1	5	1619		protein TANC1	5	1878
sorbin and SH3 domain-containing protein 1	5	1584		protein TANC1	5	1883
sorbin and SH3 domain-containing protein 1	5	1562		protein TANC1	5	1883
sorbin and SH3 domain-containing protein 1	5	1628		protein TANC1	5	1871
echinoderm microtubule-associated protein-like 5	5	1974		protein TANC1	5	1879
general transcription factor 3C polypeptide 1	5	2109		protein TANC1	5	1872
chondroitin sulfate proteoglycan 4	5	2322		protein TANC1	5	1844
envoplakin	5	2033		protein TANC1	5	1838
microtubule-associated protein 2	5	1827		protein TANC1	5	1791
matrilin-2	5	956		protein TANC1	5	1790
protein NPAT	5	1427		protein TANC1	5	1773
pregnancy zone protein	5	1482		neural cell adhesion molecule L1-like protein	5	1224
DNA polymerase zeta catalytic subunit	5	3130		neural cell adhesion molecule L1-like protein	5	1224
transformation/transcription domain-associated protein	5	3830		neural cell adhesion molecule L1-like protein	5	1224
sodium bicarbonate cotransporter 3	5	1214		neural cell adhesion molecule L1-like protein	5	1208
protocadherin-16	5	3298		neural cell adhesion molecule L1-like protein	5	1208
multiple PDZ domain protein	5	2041		neural cell adhesion molecule L1-like protein	5	1208
Golgi-specific brefeldin A-resistance guanine nucleotide exchange factor 1	5	1859		neural cell adhesion molecule L1-like protein	5	1171
versican core protein	5	3396		neural cell adhesion molecule L1-like protein	5	1171
desmoplakin	5	2871		histone-lysine N-methyltransferase SETD5	5	1493
maltase-glucoamylase, intestinal	5	1857		histone-lysine N-methyltransferase SETD5	5	1480
reelin	5	3460		histone-lysine N-methyltransferase SETD5	5	1461
TP53-binding protein 1	5	1972		sodium bicarbonate cotransporter 3	5	1135
homeodomain-interacting protein kinase 3	5	1215		sodium bicarbonate cotransporter 3	5	1118
golgin subfamily A member 3	5	1498		transmembrane protein KIAA1109	5	4170
mucin-3A	5	3323		transmembrane protein KIAA1109	5	2859
rho GTPase-activating protein 7	5	1091		fibrocystin	5	4074
brefeldin A-inhibited guanine nucleotide-exchange protein 1	5	1849		fibrocystin	5	4049
neural cell adhesion molecule L1-like protein	5	1224		fibrocystin	5	4009
utrophin	5	3433		fibrocystin	5	3986
transient receptor potential cation channel subfamily A member 1	5	1119		fibrocystin	5	3403
PR domain zinc finger protein 2	5	1718		DNA polymerase zeta catalytic subunit	5	3078
protein piccolo	5	4935		DNA polymerase zeta catalytic subunit	5	3078
midasin	5	5596		DNA polymerase zeta catalytic subunit	5	3078
dyslexia-associated protein KIAA0319	5	1072		dyslexia-associated protein KIAA0319	5	1063
apoptotic chromatin condensation inducer in the nucleus	5	1341		dyslexia-associated protein KIAA0319	5	1047
pecanex-like protein 1	5	2341		dyslexia-associated protein KIAA0319	5	1039
protein MON2 homolog	5	1717		dyslexia-associated protein KIAA0319	5	986
E3 ubiquitin-protein ligase MYCBP2	5	4678		dyslexia-associated protein KIAA0319	5	978
structural maintenance of chromosomes flexible hinge domain-containing protein 1	5	2005		dyslexia-associated protein KIAA0319	5	978
little elongation complex subunit 1	5	2266		dyslexia-associated protein KIAA0319	5	937
BTB/POZ domain-containing protein KCTD2	5	263		multiple PDZ domain protein	5	2042
protein virilizer homolog	5	1812		multiple PDZ domain protein	5	2008
ATP-binding cassette sub-family A member 12	5	2277		WD repeat- and FYVE domain-containing protein 4	5	3184
PR domain zinc finger protein 2	5	1682		homeodomain-interacting protein kinase 3	5	1215
baculoviral IAP repeat-containing protein 6	5	4857		teneurin-4	5	2794
chromodomain-helicase-DNA-binding protein 7	5	2997		teneurin-4	5	2769
telomere-associated protein RIF1	5	2472		protein NPAT	5	1368
4'-phosphopantetheine phosphatase	5	773		protein NPAT	5	1368
HEAT repeat-containing protein 5B	5	2071		protein MON2 homolog	5	1718
partitioning defective 3 homolog	5	1356		protein MON2 homolog	5	1712
ankyrin-1	5	1856		WASH complex subunit 4	5	941
ankyrin-1	5	1881		inositol 1,4,5-trisphosphate receptor type 2	5	1733
acrosomal protein KIAA1210	5	1709		E3 ubiquitin-protein ligase MYCBP2	5	4778
E3 ubiquitin-protein ligase UBR4	5	5183		E3 ubiquitin-protein ligase MYCBP2	5	4753
doublecortin domain-containing protein 1	5	890		E3 ubiquitin-protein ligase MYCBP2	5	4663
WD repeat- and FYVE domain-containing protein 4	5	3184		E3 ubiquitin-protein ligase MYCBP2	5	4532
CUB domain-containing protein 1	5	836		pecanex-like protein 1	5	2235
cyclin-P	5	307		pecanex-like protein 1	5	1421
matrilin-2	5	937		NLR family CARD domain-containing protein 3	5	1039
WD repeat-containing protein 87	5	2873		NLR family CARD domain-containing protein 3	5	1030
SLIT and NTRK-like protein 2	5	845		zinc finger protein 469	5	3953
protein mono-ADP-ribosyltransferase PARP10	5	1025		KAT8 regulatory NSL complex subunit 1	5	878
protocadherin-11 Y-linked	5	1037		structural maintenance of chromosomes flexible hinge domain-containing protein 1	5	1879
protocadherin-11 Y-linked	5	1048		FH1/FH2 domain-containing protein 3	5	1560
protocadherin-11 Y-linked	5	1340		FH1/FH2 domain-containing protein 3	5	1557
protein piccolo	5	5142		FH1/FH2 domain-containing protein 3	5	1553
protein TANC1	5	1861		FH1/FH2 domain-containing protein 3	5	1564
VPS10 domain-containing receptor SorCS1	5	1168		E3 ubiquitin-protein ligase HUWE1	5	4367
fibrocystin	5	4074		multiple PDZ domain protein	5	2070
fibrocystin	5	3396		golgin subfamily A member 3	5	1498
reelin	5	3458		golgin subfamily A member 3	5	1498
ATP-binding cassette sub-family A member 12	5	2595		golgin subfamily A member 3	5	1498
dynein heavy chain 17, axonemal	5	4462		golgin subfamily A member 3	5	1498
dynein assembly factor 1, axonemal	5	725		golgin subfamily A member 3	5	1458
rho GTPase-activating protein 7	5	1528		pecanex-like protein 1	5	1459
protein virilizer homolog	5	1147		dynein heavy chain 17, axonemal	5	4418
echinoderm microtubule-associated protein-like 5	5	1977		FH1/FH2 domain-containing protein 3	5	1467
homeodomain-interacting protein kinase 1	5	1210		telomere-associated protein RIF1	5	2464
dedicator of cytokinesis protein 8	5	2099		protein TANC1	5	1756
usherin	5	5202		N(4)-(beta-N-acetylglucosaminyl)-L-asparaginase	4	346
FRAS1-related extracellular matrix protein 2	5	3169		Hermansky-Pudlak syndrome 1 protein	4	700
protein PRRC2C	5	2719		laminin subunit alpha-2	4	3122
protein PRRC2C	5	2718		glutamate receptor 2	4	883
protein PRRC2C	5	2714		glutamate receptor 1	4	906
microtubule-associated protein 2	5	1757		glutamate receptor 3	4	894
microtubule-associated protein 2	5	1757		glutamate receptor 4	4	902
telomere-associated protein RIF1	5	2472		interleukin-7	4	177
protein TANC1	5	1871		serine/threonine-protein kinase WNK3	4	1743
midasin	5	3591		fibroblast growth factor receptor-like 1	4	504
matrilin-2	5	818		fibroblast growth factor receptor-like 1	4	504
brefeldin A-inhibited guanine nucleotide-exchange protein 1	5	1849		uromodulin-like 1	4	1318
brefeldin A-inhibited guanine nucleotide-exchange protein 1	5	1843		chromodomain-helicase-DNA-binding protein 3	4	2059
brefeldin A-inhibited guanine nucleotide-exchange protein 1	5	1800		chromodomain-helicase-DNA-binding protein 3	4	2000
homeodomain-interacting protein kinase 3	5	1215		WASH complex subunit 2A	4	1341
MAX gene-associated protein	5	3115		protocadherin Fat 3	4	4557
MAX gene-associated protein	5	3115		DNA excision repair protein ERCC-6-like	4	1127
MAX gene-associated protein	5	3115		VPS10 domain-containing receptor SorCS1	4	1198
MAX gene-associated protein	5	3115		Fanconi anemia group D2 protein	4	1451
MAX gene-associated protein	5	3115		neuron navigator 3	4	2385
MAX gene-associated protein	5	3114		AT-hook DNA-binding motif-containing protein 1	4	1603
MAX gene-associated protein	5	2906		sorbin and SH3 domain-containing protein 1	4	1292
FH1/FH2 domain-containing protein 3	5	1559		helicase with zinc finger domain 2	4	2649
SLIT and NTRK-like protein 2	5	845		solute carrier family 2, facilitated glucose transporter member 4	4	509
SLIT and NTRK-like protein 2	5	845		solute carrier family 26 member 6	4	738
SLIT and NTRK-like protein 2	5	845		glutamate receptor 4	4	884
SLIT and NTRK-like protein 2	5	845		nuclear receptor corepressor 2	4	2458
baculoviral IAP repeat-containing protein 6	5	4880		cubilin	4	3623
baculoviral IAP repeat-containing protein 6	5	4875		laminin subunit alpha-2	4	3118
baculoviral IAP repeat-containing protein 6	5	4870		MAX gene-associated protein	4	2856
baculoviral IAP repeat-containing protein 6	5	4861		RB1-inducible coiled-coil protein 1	4	1591
baculoviral IAP repeat-containing protein 6	5	4847		glutamate receptor 2	4	883
baculoviral IAP repeat-containing protein 6	5	4840		glutamate receptor 2	4	836
histone-lysine N-methyltransferase SETD5	5	1461		coatomer subunit alpha	4	1233
sodium bicarbonate cotransporter 3	5	1126		roquin-2	4	1191
sodium bicarbonate cotransporter 3	5	1113		maestro heat-like repeat-containing protein family member 6	4	719
golgin subfamily A member 3	5	1458		laminin subunit alpha-4	4	1823
golgin subfamily A member 3	5	1307		laminin subunit alpha-4	4	1816
E3 ubiquitin-protein ligase MYCBP2	5	4755		neuron navigator 2	4	2365
NHS-like protein 1	5	1654		glutamate receptor 1	4	906
utrophin	5	3438		coiled-coil domain-containing protein 17	4	622
utrophin	5	3433		laminin subunit alpha-3	4	3277
utrophin	5	3424		lipase member M	4	423
apoptotic chromatin condensation inducer in the nucleus	5	1329		inositol hexakisphosphate and diphosphoinositol-pentakisphosphate kinase 1	4	1433
pecanex-like protein 1	5	2349		inositol hexakisphosphate and diphosphoinositol-pentakisphosphate kinase 1	4	1408
pecanex-like protein 1	5	2348		protein eyes shut homolog	4	3144
pecanex-like protein 1	5	2344		SLIT and NTRK-like protein 2	4	845
pecanex-like protein 1	5	2336		SLIT and NTRK-like protein 2	4	845
pecanex-like protein 1	5	2312		SLIT and NTRK-like protein 2	4	845
pecanex-like protein 1	5	2243		SLIT and NTRK-like protein 2	4	845
WD repeat- and FYVE domain-containing protein 4	5	3184		SLIT and NTRK-like protein 2	4	845
homeodomain-interacting protein kinase 1	5	1209		SLIT and NTRK-like protein 2	4	845
homeodomain-interacting protein kinase 1	5	1185		SLIT and NTRK-like protein 2	4	845
homeodomain-interacting protein kinase 1	5	1210		NHS-like protein 1	4	1606
dmX-like protein 1	5	3086		protein sidekick-2	4	2172
dmX-like protein 1	5	3020		uncharacterized protein KIAA1671	4	1806
rho GTPase-activating protein 7	5	1528		histone-lysine N-methyltransferase SETDB1	4	1291
ankyrin-1	5	1921		otoancorin	4	1060
homeodomain-interacting protein kinase 1	5	1176		MAX gene-associated protein	4	3065
ryanodine receptor 2	5	4906		nebulin	4	8525
HEAT repeat-containing protein 5B	5	2070		nebulin	4	8525
HEAT repeat-containing protein 5B	5	2059		glutamate receptor ionotropic, kainate 2	4	892
baculoviral IAP repeat-containing protein 6	5	4878		protein strawberry notch homolog 1	4	1393
baculoviral IAP repeat-containing protein 6	5	4864		protocadherin-11 X-linked	4	1339
baculoviral IAP repeat-containing protein 6	5	4851		protocadherin-11 X-linked	4	1310
thyroid adenoma-associated protein	5	1913		protocadherin-11 X-linked	4	1329
protein TANC1	5	1861		chromodomain-helicase-DNA-binding protein 8	4	2581
protein TANC1	5	1826		N(4)-(beta-N-acetylglucosaminyl)-L-asparaginase	4	336
neural cell adhesion molecule L1-like protein	5	1224		golgin subfamily A member 3	4	1134
neural cell adhesion molecule L1-like protein	5	1224		coiled-coil domain-containing protein 17	4	613
neural cell adhesion molecule L1-like protein	5	1224		inositol hexakisphosphate and diphosphoinositol-pentakisphosphate kinase 1	4	1406
sodium bicarbonate cotransporter 3	5	1255		nuclear receptor corepressor 1	4	2337
midasin	5	3744		uromodulin-like 1	4	1374
multiple PDZ domain protein	5	2070		uromodulin-like 1	4	1246
multiple PDZ domain protein	5	2070		interleukin-7	4	133
multiple PDZ domain protein	5	2041		interleukin-7	4	159
Golgi-specific brefeldin A-resistance guanine nucleotide exchange factor 1	5	1893		interleukin-7	4	115
Golgi-specific brefeldin A-resistance guanine nucleotide exchange factor 1	5	1892		BIVM-ERCC5 protein	4	1640
Golgi-specific brefeldin A-resistance guanine nucleotide exchange factor 1	5	1889		VPS10 domain-containing receptor SorCS1	4	1179
Golgi-specific brefeldin A-resistance guanine nucleotide exchange factor 1	5	1881		VPS10 domain-containing receptor SorCS1	4	1130
nck-associated protein 5-like	5	1334		VPS10 domain-containing receptor SorCS1	4	1159
golgin subfamily A member 3	5	1498		VPS10 domain-containing receptor SorCS1	4	1179
golgin subfamily A member 3	5	1498		nuclear receptor corepressor 2	4	2504
E3 ubiquitin-protein ligase MYCBP2	5	4789		neuron navigator 2	4	2488
E3 ubiquitin-protein ligase MYCBP2	5	4737		glutamate receptor 1	4	826
E3 ubiquitin-protein ligase MYCBP2	5	4703		glutamate receptor 1	4	811
E3 ubiquitin-protein ligase MYCBP2	5	4689		glutamate receptor 1	4	916
E3 ubiquitin-protein ligase MYCBP2	5	4752		glutamate receptor 1	4	916
echinoderm microtubule-associated protein-like 5	5	1969		glutamate receptor 1	4	837
pecanex-like protein 1	5	1423		disheveled-associated activator of morphogenesis 1	4	1068
MAX gene-associated protein	5	3115		hydrocephalus-inducing protein homolog	4	5121
dynein assembly factor 1, axonemal	5	727		nebulin	4	8560
ATP-binding cassette sub-family A member 12	5	2598		thyroid adenoma-associated protein	4	937
protein unc-80 homolog	5	1950		thyroid adenoma-associated protein	4	894
microtubule-associated protein 2	5	1914		slit homolog 3 protein	4	1530
microtubule-associated protein 2	5	1911		dynein heavy chain 11, axonemal	4	4516
microtubule-associated protein 2	5	1910		SKI family transcriptional corepressor 2	4	1015
protein TANC1	5	1885		protein MON2 homolog	4	1645
protein TANC1	5	1879		elastin	4	658
protein TANC1	5	1879		solute carrier family 26 member 6	4	723
protein TANC1	5	1853		solute carrier family 26 member 6	4	651
protein TANC1	5	1697		FH1/FH2 domain-containing protein 3	4	1422
little elongation complex subunit 1	5	2139		signal-induced proliferation-associated 1-like protein 1	4	1783
fibrocystin	5	4074		signal-induced proliferation-associated 1-like protein 1	4	1782
fibrocystin	5	4028		signal-induced proliferation-associated 1-like protein 1	4	1803
fibrocystin	5	3860		anillin	4	1087
fibrocystin	5	3416		anillin	4	1086
fibrocystin	5	3402		centrosomal protein of 162 kDa	4	1327
fibrocystin	5	3395		general transcription factor 3C polypeptide 1	4	2084
dyslexia-associated protein KIAA0319	5	1027		protein FAM214A	4	1083
ATP-binding cassette sub-family A member 13	5	4861		anaphase-promoting complex subunit 4	4	809
ATP-binding cassette sub-family A member 13	5	4468		1-phosphatidylinositol 4,5-bisphosphate phosphodiesterase epsilon-1	4	2286
ATP-binding cassette sub-family A member 13	5	4456		filamin-A-interacting protein 1	4	1216
ATP-binding cassette sub-family A member 13	5	4329		dedicator of cytokinesis protein 10	4	2180
ATP-binding cassette sub-family A member 13	5	4298		sorbin and SH3 domain-containing protein 1	4	1266
ATP-binding cassette sub-family A member 13	5	4030		catenin alpha-1	4	841
ATP-binding cassette sub-family A member 13	5	4024		dmX-like protein 1	4	3048
homeodomain-interacting protein kinase 2	5	1377		hemicentin-2	4	5079
homeodomain-interacting protein kinase 2	5	1376		protein eyes shut homolog	4	3165
homeodomain-interacting protein kinase 2	5	1350		histone-lysine N-methyltransferase SETD5	4	1344
homeodomain-interacting protein kinase 2	5	1349		WASH complex subunit 4	4	1174
maltase-glucoamylase, intestinal	5	2753		mitogen-activated protein kinase kinase kinase 6	4	1280
maltase-glucoamylase, intestinal	5	2753		filamin-A-interacting protein 1	4	1177
maltase-glucoamylase, intestinal	5	2753		transcription factor-like 5 protein	4	461
maltase-glucoamylase, intestinal	5	2753		solute carrier family 22 member 5	4	581
protein mono-ADP-ribosyltransferase PARP10	5	1016		matrilin-2	4	915
chromodomain-helicase-DNA-binding protein 7	5	3027		nuclear receptor coactivator 6	4	2063
chromodomain-helicase-DNA-binding protein 7	5	3027		unconventional myosin-XVIIIb	4	2568
chromodomain-helicase-DNA-binding protein 7	5	3026		A disintegrin and metalloproteinase with thrombospondin motifs 9	4	1907
transient receptor potential cation channel subfamily A member 1	5	1144		neuronal PAS domain-containing protein 4	4	592
transient receptor potential cation channel subfamily A member 1	5	1119		Fanconi anemia group D2 protein	4	1451
dedicator of cytokinesis protein 8	5	1999		palmitoyltransferase ZDHHC23	4	435
dedicator of cytokinesis protein 8	5	2053		palmitoyltransferase ZDHHC23	4	435
dedicator of cytokinesis protein 8	5	2031		palmitoyltransferase ZDHHC23	4	432
dedicator of cytokinesis protein 8	5	2031		thyroid receptor-interacting protein 11	4	1978
pregnancy zone protein	5	1500		Hermansky-Pudlak syndrome 1 protein	4	700
pregnancy zone protein	5	1499		Hermansky-Pudlak syndrome 1 protein	4	700
coiled-coil domain-containing protein 168	5	7041		Hermansky-Pudlak syndrome 1 protein	4	613
MAX gene-associated protein	5	3005		Hermansky-Pudlak syndrome 1 protein	4	613
MAX gene-associated protein	5	3004		Hermansky-Pudlak syndrome 1 protein	4	577
TP53-binding protein 1	5	1927		Hermansky-Pudlak syndrome 1 protein	4	577
TP53-binding protein 1	5	1700		pleckstrin homology domain-containing family A member 7	4	1271
polycystin-1	5	4321		pleckstrin homology domain-containing family A member 7	4	1122
polycystin-1	5	4320		WASH complex subunit 2C	4	1341
dynein assembly factor 1, axonemal	5	772		protein phosphatase 1 regulatory subunit 12B	4	1043
dynein assembly factor 1, axonemal	5	743		RNA polymerase-associated protein CTR9 homolog	4	1149
dynein assembly factor 1, axonemal	5	741		baculoviral IAP repeat-containing protein 1	4	1403
KAT8 regulatory NSL complex subunit 1	5	1071		dmX-like protein 1	4	3048
E3 ubiquitin-protein ligase RNF213	5	3824		histone-lysine N-methyltransferase SETD5	4	1344
dynein heavy chain 17, axonemal	5	4466		protein TANC1	4	1660
structural maintenance of chromosomes flexible hinge domain-containing protein 1	5	2067		dyslexia-associated protein KIAA0319	4	920
structural maintenance of chromosomes flexible hinge domain-containing protein 1	5	2004		dyslexia-associated protein KIAA0319	4	920
FH1/FH2 domain-containing protein 3	5	1642		protein AHNAK2	4	5695
FH1/FH2 domain-containing protein 3	5	1634		pleckstrin homology domain-containing family G member 2	4	1237
FH1/FH2 domain-containing protein 3	5	1617		signal-induced proliferation-associated 1-like protein 1	4	1804
FH1/FH2 domain-containing protein 3	5	1615		signal-induced proliferation-associated 1-like protein 1	4	1782
FH1/FH2 domain-containing protein 3	5	1543		signal-induced proliferation-associated 1-like protein 1	4	1782
FH1/FH2 domain-containing protein 3	5	1609		signal-induced proliferation-associated 1-like protein 1	4	1782
WD repeat-containing protein 87	5	2912		inositol hexakisphosphate and diphosphoinositol-pentakisphosphate kinase 1	4	1429
HEAT repeat-containing protein 5B	5	2071		inositol hexakisphosphate and diphosphoinositol-pentakisphosphate kinase 1	4	1429
neural cell adhesion molecule L1-like protein	5	1224		inositol hexakisphosphate and diphosphoinositol-pentakisphosphate kinase 1	4	1429
neural cell adhesion molecule L1-like protein	5	1208		inositol hexakisphosphate and diphosphoinositol-pentakisphosphate kinase 1	4	1429
neural cell adhesion molecule L1-like protein	5	1208		inositol hexakisphosphate and diphosphoinositol-pentakisphosphate kinase 1	4	1429
neural cell adhesion molecule L1-like protein	5	1171		inositol hexakisphosphate and diphosphoinositol-pentakisphosphate kinase 1	4	1421
histone-lysine N-methyltransferase SETD5	5	1493		inositol hexakisphosphate and diphosphoinositol-pentakisphosphate kinase 1	4	1421
histone-lysine N-methyltransferase SETD5	5	1474		inositol hexakisphosphate and diphosphoinositol-pentakisphosphate kinase 1	4	1421
CUB domain-containing protein 1	5	835		inositol hexakisphosphate and diphosphoinositol-pentakisphosphate kinase 1	4	1408
sodium bicarbonate cotransporter 3	5	1250		inositol hexakisphosphate and diphosphoinositol-pentakisphosphate kinase 1	4	1408
sodium bicarbonate cotransporter 3	5	1223		inositol hexakisphosphate and diphosphoinositol-pentakisphosphate kinase 1	4	1408
sodium bicarbonate cotransporter 3	5	1201		inositol hexakisphosphate and diphosphoinositol-pentakisphosphate kinase 1	4	1400
sodium bicarbonate cotransporter 3	5	1122		inositol hexakisphosphate and diphosphoinositol-pentakisphosphate kinase 1	4	1380
sodium bicarbonate cotransporter 3	5	1099		inositol hexakisphosphate and diphosphoinositol-pentakisphosphate kinase 1	4	1366
golgin subfamily A member 3	5	1407		inositol hexakisphosphate and diphosphoinositol-pentakisphosphate kinase 1	4	1366
E3 ubiquitin-protein ligase MYCBP2	5	4688		inositol hexakisphosphate and diphosphoinositol-pentakisphosphate kinase 1	4	1366
E3 ubiquitin-protein ligase MYCBP2	5	3842		roquin-2	4	1129
midasin	5	5499		roquin-2	4	1153
midasin	5	5242		dedicator of cytokinesis protein 10	4	2199
NHS-like protein 1	5	1672		palmitoyltransferase ZDHHC23	4	412
NHS-like protein 1	5	1672		glutamate receptor 1	4	915
NHS-like protein 1	5	1625		glutamate receptor 1	4	837
NHS-like protein 1	5	1624		nuclear pore complex protein Nup98-Nup96	4	1831
NHS-like protein 1	5	1618		nuclear pore complex protein Nup98-Nup96	4	1792
NHS-like protein 1	5	1610		nuclear pore complex protein Nup98-Nup96	4	1783
NHS-like protein 1	5	1607		nuclear pore complex protein Nup98-Nup96	4	1753
NHS-like protein 1	5	1607		putative short-chain dehydrogenase/reductase family 42E member 2	4	626
NHS-like protein 1	5	1548		histone-lysine N-methyltransferase, H3 lysine-36 specific	4	2427
DNA polymerase zeta catalytic subunit	5	3157		maltase-glucoamylase, intestinal	4	2753
DNA polymerase zeta catalytic subunit	5	3156		dynein heavy chain 12, axonemal	4	3960
DNA polymerase zeta catalytic subunit	5	3131		histone-lysine N-methyltransferase SETDB1	4	1292
DNA polymerase zeta catalytic subunit	5	3079		histone-lysine N-methyltransferase SETDB1	4	1292
DNA polymerase zeta catalytic subunit	5	3079		WASH complex subunit 2C	4	1362
utrophin	5	3469		WASH complex subunit 2C	4	1266
utrophin	5	3469		WASH complex subunit 2C	4	1265
utrophin	5	3433		WASH complex subunit 2C	4	1317
echinoderm microtubule-associated protein-like 5	5	2002		WASH complex subunit 2C	4	1288
echinoderm microtubule-associated protein-like 5	5	1999		WASH complex subunit 2C	4	1254
echinoderm microtubule-associated protein-like 5	5	1994		protocadherin Fat 3	4	4589
echinoderm microtubule-associated protein-like 5	5	1994		doublecortin domain-containing protein 1	4	1783
echinoderm microtubule-associated protein-like 5	5	1956		receptor-type tyrosine-protein phosphatase zeta	4	2308
echinoderm microtubule-associated protein-like 5	5	1943		receptor-type tyrosine-protein phosphatase zeta	4	2301
echinoderm microtubule-associated protein-like 5	5	1587		arf-GAP with Rho-GAP domain, ANK repeat and PH domain-containing protein 1	4	1194
nck-associated protein 5-like	5	1334		homeodomain-interacting protein kinase 1	4	1210
1-phosphatidylinositol 4,5-bisphosphate phosphodiesterase epsilon-1	5	1623		homeodomain-interacting protein kinase 1	4	1209
1-phosphatidylinositol 4,5-bisphosphate phosphodiesterase epsilon-1	5	1622		WD repeat- and FYVE domain-containing protein 4	4	1614
WD repeat- and FYVE domain-containing protein 4	5	3224		fibroblast growth factor receptor-like 1	4	504
WD repeat- and FYVE domain-containing protein 4	5	3217		protein unc-13 homolog B	4	1990
WD repeat- and FYVE domain-containing protein 4	5	3184		protein unc-13 homolog B	4	4340
Golgi-specific brefeldin A-resistance guanine nucleotide exchange factor 1	5	1846		AT-hook DNA-binding motif-containing protein 1	4	1603
Golgi-specific brefeldin A-resistance guanine nucleotide exchange factor 1	5	1638		dynein heavy chain 6, axonemal	4	4158
Golgi-specific brefeldin A-resistance guanine nucleotide exchange factor 1	5	1416		Fanconi anemia group D2 protein	4	1414
homeodomain-interacting protein kinase 1	5	1170		Fanconi anemia group D2 protein	4	1458
E3 ubiquitin-protein ligase UBR4	5	5266		dystonin	4	7794
E3 ubiquitin-protein ligase UBR4	5	5264		dystonin	4	7803
E3 ubiquitin-protein ligase UBR4	5	5231		dystonin	4	7818
E3 ubiquitin-protein ligase UBR4	5	5220		multiple PDZ domain protein	4	1934
protein NPAT	5	1436		ATP-binding cassette sub-family A member 10	4	1543
dmX-like protein 1	5	3086		glutamate receptor 2	4	836
dmX-like protein 1	5	3086		glutamate receptor 2	4	836
dmX-like protein 1	5	2913		neurobeachin	4	2964
dmX-like protein 1	5	2913		glutamyl aminopeptidase	4	941
ankyrin-1	5	1969		sorbin and SH3 domain-containing protein 1	4	1304
ankyrin-1	5	1968		sorbin and SH3 domain-containing protein 1	4	1326
ankyrin-1	5	1954		sorbin and SH3 domain-containing protein 1	4	1326
ankyrin-1	5	1953		dipeptidyl peptidase 9	4	812
ankyrin-1	5	1944		ciliogenesis and planar polarity effector 1	4	3251
ankyrin-1	5	1914		neurobeachin	4	2967
ankyrin-1	5	1913		protein FAM214A	4	1076
ankyrin-1	5	1889		protein FAM214A	4	1076
teneurin-4	5	1917		protein FAM214A	4	1076
E3 ubiquitin-protein ligase UBR4	5	5265		protein FAM214A	4	1076
E3 ubiquitin-protein ligase UBR4	5	5238		protein FAM214A	4	1076
E3 ubiquitin-protein ligase UBR4	5	5232		protein FAM214A	4	1076
E3 ubiquitin-protein ligase UBR4	5	5227		protein FAM214A	4	1083
E3 ubiquitin-protein ligase UBR4	5	5219		protein FAM214A	4	1060
E3 ubiquitin-protein ligase UBR4	5	5203		protein FAM214A	4	1013
E3 ubiquitin-protein ligase UBR4	5	5186		protein FAM214A	4	988
protein phosphatase 1 regulatory subunit 12B	5	1059		protein FAM214A	4	988
protein phosphatase 1 regulatory subunit 12B	5	1058		microtubule-associated protein 4	4	2219
protein phosphatase 1 regulatory subunit 12B	5	998		microtubule-associated protein 4	4	2296
protein phosphatase 1 regulatory subunit 12B	5	997		microtubule-associated protein 4	4	2296
PR domain zinc finger protein 2	5	1718		microtubule-associated protein 4	4	2219
PR domain zinc finger protein 2	5	1718		microtubule-associated protein 4	4	2258
PR domain zinc finger protein 2	5	1682		general transcription factor 3C polypeptide 1	4	2109
microtubule-associated protein 2	5	1915		DNA damage-binding protein 1	4	1140
microtubule-associated protein 2	5	1910		laminin subunit alpha-4	4	1816
microtubule-associated protein 2	5	1858		laminin subunit beta-2	4	1798
microtubule-associated protein 2	5	1853		matrilin-2	4	956
microtubule-associated protein 2	5	1826		mucin-2	4	5289
microtubule-associated protein 2	5	1821		protein phosphatase 1 regulatory subunit 12B	4	982
microtubule-associated protein 2	5	1820		receptor-type tyrosine-protein phosphatase zeta	4	2315
microtubule-associated protein 2	5	1757		solute carrier family 22 member 5	4	557
microtubule-associated protein 2	5	1700		slit homolog 3 protein	4	1523
HEAT repeat-containing protein 5B	5	1982		nuclear receptor-interacting protein 1	4	1158
HEAT repeat-containing protein 5B	5	1946		ras GTPase-activating-like protein IQGAP1	4	1657
HEAT repeat-containing protein 5B	5	1946		myomesin-2	4	1465
telomere-associated protein RIF1	5	2464		thyroid receptor-interacting protein 11	4	1979
telomere-associated protein RIF1	5	2441		coatomer subunit alpha	4	1224
telomere-associated protein RIF1	5	2436		versican core protein	4	3396
telomere-associated protein RIF1	5	2433		low-density lipoprotein receptor-related protein 2	4	4655
baculoviral IAP repeat-containing protein 6	5	4858		baculoviral IAP repeat-containing protein 1	4	1403
baculoviral IAP repeat-containing protein 6	5	4847		nebulin	4	6669
baculoviral IAP repeat-containing protein 6	5	4837		maltase-glucoamylase, intestinal	4	1857
baculoviral IAP repeat-containing protein 6	5	4715		mitogen-activated protein kinase kinase kinase 6	4	1288
protein TANC1	5	1878		disks large homolog 5	4	1919
protein TANC1	5	1883		symplekin	4	1274
protein TANC1	5	1883		protocadherin Fat 1	4	4588
protein TANC1	5	1871		nucleolin	4	710
protein TANC1	5	1879		laminin subunit gamma-2	4	1193
protein TANC1	5	1872		chromodomain-helicase-DNA-binding protein 3	4	1966
protein TANC1	5	1844		bone morphogenetic protein 1	4	986
protein TANC1	5	1838		talin-1	4	2541
protein TANC1	5	1791		nuclear receptor corepressor 2	4	2514
protein TANC1	5	1790		transcription factor-like 5 protein	4	500
protein TANC1	5	1773		glutamate receptor 3	4	894
neural cell adhesion molecule L1-like protein	5	1224		histone-lysine N-methyltransferase SETDB1	4	1290
neural cell adhesion molecule L1-like protein	5	1224		splicing factor 3B subunit 1	4	1304
neural cell adhesion molecule L1-like protein	5	1224		anaphase-promoting complex subunit 4	4	808
neural cell adhesion molecule L1-like protein	5	1208		nuclear receptor coactivator 6	4	2063
neural cell adhesion molecule L1-like protein	5	1208		sodium-dependent proline transporter	4	636
neural cell adhesion molecule L1-like protein	5	1208		midasin	4	5596
neural cell adhesion molecule L1-like protein	5	1171		RNA polymerase-associated protein CTR9 homolog	4	1173
neural cell adhesion molecule L1-like protein	5	1171		inositol hexakisphosphate and diphosphoinositol-pentakisphosphate kinase 1	4	1408
histone-lysine N-methyltransferase SETD5	5	1493		dedicator of cytokinesis protein 10	4	2186
histone-lysine N-methyltransferase SETD5	5	1480		RB1-inducible coiled-coil protein 1	4	1594
histone-lysine N-methyltransferase SETD5	5	1461		pecanex-like protein 2	4	2137
CUB domain-containing protein 1	5	786		centrosomal protein of 162 kDa	4	1403
sodium bicarbonate cotransporter 3	5	1135		neuron navigator 3	4	2363
sodium bicarbonate cotransporter 3	5	1118		disheveled-associated activator of morphogenesis 1	4	1078
transmembrane protein KIAA1109	5	4170		E3 ubiquitin-protein ligase MYCBP2	4	4678
transmembrane protein KIAA1109	5	2859		serine/threonine-protein kinase SMG1	4	3661
dmX-like protein 1	5	3020		arf-GAP with Rho-GAP domain, ANK repeat and PH domain-containing protein 1	4	1205
dmX-like protein 1	5	3020		WASH complex subunit 4	4	1173
dmX-like protein 1	5	3020		little elongation complex subunit 1	4	2266
dmX-like protein 1	5	3017		E3 ubiquitin-protein ligase HECTD1	4	2610
dmX-like protein 1	5	2931		RNA polymerase II-associated protein 1	4	1393
dmX-like protein 1	5	2913		signal-induced proliferation-associated 1-like protein 1	4	1804
little elongation complex subunit 1	5	1996		neurobeachin	4	2946
mitogen-activated protein kinase kinase kinase 1	5	1375		filamin-A-interacting protein 1	4	1213
fibrocystin	5	4074		BRD4-interacting chromatin-remodeling complex-associated protein	4	1560
fibrocystin	5	4049		nuclear pore complex protein Nup98-Nup96	4	1800
fibrocystin	5	4009		1-phosphatidylinositol 4,5-bisphosphate phosphodiesterase epsilon-1	4	2302
fibrocystin	5	3986		homeobox protein SIX4	4	781
fibrocystin	5	3403		stabilin-2	4	2551
NHS-like protein 1	5	1672		DNA excision repair protein ERCC-6-like	4	1250
NHS-like protein 1	5	1637		PH-interacting protein	4	1821
NHS-like protein 1	5	1622		protein strawberry notch homolog 1	4	1392
NHS-like protein 1	5	1592		4'-phosphopantetheine phosphatase	4	773
DNA polymerase zeta catalytic subunit	5	3078		anillin	4	1124
DNA polymerase zeta catalytic subunit	5	3078		laminin subunit gamma-2	4	1111
DNA polymerase zeta catalytic subunit	5	3078		protein FAM214A	4	1076
utrophin	5	3468		manganese-transporting ATPase 13A1	4	1204
utrophin	5	3456		reticulon-4	4	1192
dyslexia-associated protein KIAA0319	5	1063		caskin-1	4	1431
dyslexia-associated protein KIAA0319	5	1047		doublecortin domain-containing protein 1	4	890
dyslexia-associated protein KIAA0319	5	1039		serine/threonine-protein kinase WNK3	4	1800
dyslexia-associated protein KIAA0319	5	986		carbohydrate sulfotransferase 6	4	395
dyslexia-associated protein KIAA0319	5	978		fibroblast growth factor receptor-like 1	4	504
dyslexia-associated protein KIAA0319	5	978		glutamate receptor ionotropic, kainate 2	4	908
dyslexia-associated protein KIAA0319	5	937		histone-lysine N-methyltransferase, H3 lysine-36 specific	4	2696
ATP-binding cassette sub-family A member 13	5	4433		anaphase-promoting complex subunit 1	4	1944
ATP-binding cassette sub-family A member 13	5	4396		pleckstrin homology domain-containing family G member 2	4	1386
maltase-glucoamylase, intestinal	5	2753		baculoviral IAP repeat-containing protein 1	4	1241
ankyrin-1	5	1961		solute carrier family 26 member 6	4	759
ankyrin-1	5	1946		ciliogenesis and planar polarity effector 1	4	3197
ankyrin-1	5	1940		transport and Golgi organization protein 6 homolog	4	1094
ankyrin-1	5	1937		multimerin-2	4	949
ankyrin-1	5	1936		phosphatidylinositol 3,4,5-trisphosphate-dependent Rac exchanger 2 protein	4	1606
ankyrin-1	5	1922		dedicator of cytokinesis protein 5	4	1870
ankyrin-1	5	1908		A disintegrin and metalloproteinase with thrombospondin motifs 20	4	1910
ankyrin-1	5	1892		FH1/FH2 domain-containing protein 3	4	1439
matrilin-2	5	896		SLIT and NTRK-like protein 2	4	845
matrilin-2	5	799		ubiquitin carboxyl-terminal hydrolase 32	4	1604
chromodomain-helicase-DNA-binding protein 7	5	3027		unconventional myosin-XVIIIb	4	2567
chromodomain-helicase-DNA-binding protein 7	5	2996		hepatitis A virus cellular receptor 2	4	301
transient receptor potential cation channel subfamily A member 1	5	1119		protocadherin-11 X-linked	4	1347
dedicator of cytokinesis protein 8	5	2031		protocadherin-11 X-linked	4	1337
dedicator of cytokinesis protein 8	5	2053		protocadherin-11 Y-linked	4	1340
multiple PDZ domain protein	5	2042		Fanconi anemia group D2 protein	4	1471
multiple PDZ domain protein	5	2008		helicase with zinc finger domain 2	4	2080
proline rich transmembrane protein 1B	5	323		protein dispatched homolog 2	4	1401
WD repeat- and FYVE domain-containing protein 4	5	3184		coiled-coil domain-containing protein 97	4	343
Golgi-specific brefeldin A-resistance guanine nucleotide exchange factor 1	5	1885		ATP-binding cassette sub-family A member 10	4	1543
Golgi-specific brefeldin A-resistance guanine nucleotide exchange factor 1	5	1877		titin	4	5604
Golgi-specific brefeldin A-resistance guanine nucleotide exchange factor 1	5	1847		solute carrier family 26 member 6	4	758
homeodomain-interacting protein kinase 3	5	1215		solute carrier family 26 member 6	4	740
teneurin-4	5	2794		protein AHNAK2	4	5795
teneurin-4	5	2769		nuclear pore complex protein Nup98-Nup96	4	1726
protein NPAT	5	1368		kinetochore scaffold 1	4	2316
protein NPAT	5	1368		otoancorin	4	1139
protein MON2 homolog	5	1718		neuron navigator 2	4	2429
protein MON2 homolog	5	1712		xin actin-binding repeat-containing protein 2	4	3549
WASH complex subunit 4	5	941		coiled-coil domain-containing protein 27	4	656
phosphatidylinositol phosphatase PTPRQ	5	2145		homeodomain-interacting protein kinase 1	4	1075
pregnancy zone protein	5	1500		kinesin-like protein KIF19	4	998
pregnancy zone protein	5	1488		very large A-kinase anchor protein	4	2970
pregnancy zone protein	5	1417		kinetochore scaffold 1	4	2342
E3 ubiquitin-protein ligase MYCBP2	5	4736		otoancorin	4	815
E3 ubiquitin-protein ligase MYCBP2	5	4730		histone-lysine N-methyltransferase, H3 lysine-36 specific	4	2427
E3 ubiquitin-protein ligase MYCBP2	5	4719		uromodulin-like 1	4	1446
E3 ubiquitin-protein ligase MYCBP2	5	4667		palmitoyltransferase ZDHHC23	4	409
E3 ubiquitin-protein ligase MYCBP2	5	4659		pleckstrin homology domain-containing family A member 7	4	1121
E3 ubiquitin-protein ligase MYCBP2	5	4655		glutamate receptor ionotropic, kainate 2	4	869
E3 ubiquitin-protein ligase MYCBP2	5	4642		fibrocystin-L	4	4243
E3 ubiquitin-protein ligase MYCBP2	5	4637		stAR-related lipid transfer protein 13	4	1105
E3 ubiquitin-protein ligase MYCBP2	5	4619		PDZ domain-containing protein 2	4	2839
E3 ubiquitin-protein ligase MYCBP2	5	4603		neuronal PAS domain-containing protein 4	4	802
E3 ubiquitin-protein ligase MYCBP2	5	4600		A disintegrin and metalloproteinase with thrombospondin motifs 9	4	1935
E3 ubiquitin-protein ligase MYCBP2	5	4532		neuron navigator 2	4	2432
echinoderm microtubule-associated protein-like 5	5	1997		laminin subunit alpha-3	4	3333
echinoderm microtubule-associated protein-like 5	5	1995		homeodomain-interacting protein kinase 1	4	1210
echinoderm microtubule-associated protein-like 5	5	1964		protein FAM83H	4	1179
echinoderm microtubule-associated protein-like 5	5	1962		protein PRRC2C	4	2719
echinoderm microtubule-associated protein-like 5	5	1946		protein PRRC2C	4	2718
echinoderm microtubule-associated protein-like 5	5	1945		protein PRRC2C	4	2714
echinoderm microtubule-associated protein-like 5	5	1944		AT-hook DNA-binding motif-containing protein 1	4	1603
echinoderm microtubule-associated protein-like 5	5	1943		AT-hook DNA-binding motif-containing protein 1	4	1603
echinoderm microtubule-associated protein-like 5	5	1482		AT-hook DNA-binding motif-containing protein 1	4	1603
pecanex-like protein 1	5	2235		AT-hook DNA-binding motif-containing protein 1	4	1603
pecanex-like protein 1	5	1421		AT-hook DNA-binding motif-containing protein 1	4	1603
dynein assembly factor 1, axonemal	5	756		nebulin	4	8494
dynein assembly factor 1, axonemal	5	685		nebulin	4	8494
NLR family CARD domain-containing protein 3	5	1039		nebulin	4	8494
NLR family CARD domain-containing protein 3	5	1030		nebulin	4	8494
general transcription factor 3C polypeptide 1	5	2046		nebulin	4	8494
zinc finger protein 469	5	3953		nebulin	4	8463
putative uncharacterized protein LOC400499	5	3319		nebulin	4	8463
putative uncharacterized protein LOC400499	5	3288		nebulin	4	8463
putative uncharacterized protein LOC400499	5	3285		nebulin	4	8432
putative uncharacterized protein LOC400499	5	3273		nebulin	4	8401
putative uncharacterized protein LOC400499	5	3265		nebulin	4	8401
putative uncharacterized protein LOC400499	5	3244		nebulin	4	8370
putative uncharacterized protein LOC400499	5	3239		nebulin	4	8370
putative uncharacterized protein LOC400499	5	3003		nebulin	4	8370
putative uncharacterized protein LOC400499	5	2993		nebulin	4	8339
putative uncharacterized protein LOC400499	5	2988		nebulin	4	8308
putative uncharacterized protein LOC400499	5	2556		nebulin	4	8308
putative uncharacterized protein LOC400499	5	2341		nebulin	4	8282
putative uncharacterized protein LOC400499	5	2334		nebulin	4	8282
putative uncharacterized protein LOC400499	5	1769		nebulin	4	8277
putative uncharacterized protein LOC400499	5	1715		nebulin	4	7553
KAT8 regulatory NSL complex subunit 1	5	878		very large A-kinase anchor protein	4	2679
structural maintenance of chromosomes flexible hinge domain-containing protein 1	5	1879		palmitoyltransferase ZDHHC23	4	409
FH1/FH2 domain-containing protein 3	5	1560		PDZ domain-containing protein 2	4	2873
FH1/FH2 domain-containing protein 3	5	1557		PDZ domain-containing protein 2	4	2699
FH1/FH2 domain-containing protein 3	5	1553		PDZ domain-containing protein 2	4	2699
FH1/FH2 domain-containing protein 3	5	1564		ciliogenesis and planar polarity effector 1	4	3250
dystrophin	5	2166		ciliogenesis and planar polarity effector 1	4	3250
dystrophin	5	2160		ciliogenesis and planar polarity effector 1	4	3214
cilia- and flagella-associated protein 47	5	2657		ciliogenesis and planar polarity effector 1	4	3208
protocadherin-11 Y-linked	5	1329		centrosomal protein of 162 kDa	4	1365
protocadherin-11 Y-linked	5	1329		midasin	4	3591
protocadherin-11 Y-linked	5	1329		filamin-A-interacting protein 1	4	1213
protocadherin-11 Y-linked	5	1037		filamin-A-interacting protein 1	4	1154
NHS-like protein 1	5	1447		PH-interacting protein	4	1820
utrophin	5	3424		dystonin	4	7785
maltase-glucoamylase, intestinal	5	1857		matrilin-2	4	818
ankyrin-1	5	1904		MAX gene-associated protein	4	3066
multiple PDZ domain protein	5	2070		MAX gene-associated protein	4	2956
doublecortin domain-containing protein 1	5	1786		RNA polymerase II-associated protein 1	4	1393
doublecortin domain-containing protein 1	5	1786		inositol hexakisphosphate and diphosphoinositol-pentakisphosphate kinase 1	4	1408
doublecortin domain-containing protein 1	5	1786		serine/threonine-protein kinase SMG1	4	3689
doublecortin domain-containing protein 1	5	1786		serine/threonine-protein kinase SMG1	4	3663
doublecortin domain-containing protein 1	5	1741		serine/threonine-protein kinase SMG1	4	3637
doublecortin domain-containing protein 1	5	1718		genetic suppressor element 1	4	1925
doublecortin domain-containing protein 1	5	1686		genetic suppressor element 1	4	1852
doublecortin domain-containing protein 1	5	1546		carbohydrate sulfotransferase 6	4	395
doublecortin domain-containing protein 1	5	1501		chromodomain-helicase-DNA-binding protein 3	4	2060
doublecortin domain-containing protein 1	5	1458		nuclear receptor corepressor 1	4	2524
golgin subfamily A member 3	5	1498		nuclear receptor corepressor 1	4	2523
golgin subfamily A member 3	5	1498		nuclear receptor corepressor 1	4	2515
golgin subfamily A member 3	5	1498		nuclear receptor corepressor 1	4	2514
golgin subfamily A member 3	5	1498		nuclear receptor corepressor 1	4	2466
golgin subfamily A member 3	5	1458		nuclear receptor corepressor 1	4	2448
pecanex-like protein 1	5	1459		kinesin-like protein KIF19	4	999
polycystin-1	5	4343		kinesin-like protein KIF19	4	957
polycystin-1	5	4319		FH1/FH2 domain-containing protein 3	4	1409
polycystin-1	5	4273		FH1/FH2 domain-containing protein 3	4	1401
dynein heavy chain 17, axonemal	5	4418		BRD4-interacting chromatin-remodeling complex-associated protein	4	1560
FH1/FH2 domain-containing protein 3	5	1467		pleckstrin homology domain-containing family G member 2	4	1386
microtubule-associated protein 2	5	1915		symplekin	4	1274
microtubule-associated protein 2	5	1911		transcription factor-like 5 protein	4	499
microtubule-associated protein 2	5	1910		nuclear receptor-interacting protein 1	4	1158
microtubule-associated protein 2	5	1858		nuclear receptor-interacting protein 1	4	1158
microtubule-associated protein 2	5	1854		uncharacterized protein KIAA1671	4	1806
microtubule-associated protein 2	5	1853		uncharacterized protein KIAA1671	4	1806
microtubule-associated protein 2	5	1826		SLIT and NTRK-like protein 2	4	845
microtubule-associated protein 2	5	1822		SLIT and NTRK-like protein 2	4	845
microtubule-associated protein 2	5	1822		SLIT and NTRK-like protein 2	4	845
telomere-associated protein RIF1	5	2464		SLIT and NTRK-like protein 2	4	845
protein TANC1	5	1756		protocadherin Fat 1	4	4600
CUB domain-containing protein 1	5	770		protocadherin Fat 1	4	4600
homeodomain-interacting protein kinase 1	5	1210		girdin	4	2027
N(4)-(beta-N-acetylglucosaminyl)-L-asparaginase	4	346		laminin subunit beta-2	4	1798
voltage-dependent P/Q-type calcium channel subunit alpha-1A	4	2266		histone-lysine N-methyltransferase SETD5	4	1442
Hermansky-Pudlak syndrome 1 protein	4	700		E3 ubiquitin-protein ligase MYCBP2	4	4755
protein jagged-1	4	1218		neurobeachin	4	2941
laminin subunit alpha-2	4	3122		glutamate receptor ionotropic, kainate 2	4	859
glutamate receptor 2	4	883		laminin subunit alpha-2	4	3210
glutamate receptor 1	4	906		laminin subunit alpha-2	4	3206
glutamate receptor 3	4	894		laminin subunit alpha-4	4	1823
glutamate receptor 4	4	902		laminin subunit alpha-4	4	1823
glutamate receptor ionotropic, NMDA 2A	4	1464		NHS-like protein 1	4	1654
interleukin-7	4	177		disheveled-associated activator of morphogenesis 1	4	1078
pyruvate carboxylase, mitochondrial	4	1178		disheveled-associated activator of morphogenesis 1	4	1078
serine/threonine-protein kinase WNK3	4	1743		E3 ubiquitin-protein ligase HECTD1	4	2610
leptin receptor	4	958		signal-induced proliferation-associated 1-like protein 1	4	1804
fibroblast growth factor receptor-like 1	4	504		homeobox protein SIX4	4	773
fibroblast growth factor receptor-like 1	4	504		nck-associated protein 5-like	4	1289
uromodulin-like 1	4	1318		neuron navigator 3	4	2356
chromodomain-helicase-DNA-binding protein 3	4	2059		Hermansky-Pudlak syndrome 1 protein	4	700
chromodomain-helicase-DNA-binding protein 3	4	2000		WASH complex subunit 2A	4	1317
E3 ubiquitin-protein ligase LRSAM1	4	723		WASH complex subunit 2A	4	1312
E3 ubiquitin-protein ligase LRSAM1	4	723		multimerin-2	4	888
WASH complex subunit 2A	4	1341		disks large homolog 5	4	1915
PR domain zinc finger protein 2	4	1481		homeodomain-interacting protein kinase 1	4	1209
protocadherin Fat 3	4	4557		homeodomain-interacting protein kinase 1	4	1185
DNA excision repair protein ERCC-6-like	4	1127		homeodomain-interacting protein kinase 1	4	1210
VPS10 domain-containing receptor SorCS1	4	1198		glutamate receptor 4	4	902
vacuolar protein sorting-associated protein 13C	4	3628		dmX-like protein 1	4	3086
Fanconi anemia group D2 protein	4	1451		dmX-like protein 1	4	3020
neuron navigator 3	4	2385		homeodomain-interacting protein kinase 1	4	1176
AT-hook DNA-binding motif-containing protein 1	4	1603		dynein heavy chain 6, axonemal	4	4158
sorbin and SH3 domain-containing protein 1	4	1292		nebulin	4	8370
helicase with zinc finger domain 2	4	2649		nebulin	4	8370
solute carrier family 2, facilitated glucose transporter member 4	4	509		dedicator of cytokinesis protein 10	4	2206
probable ubiquitin carboxyl-terminal hydrolase FAF-X	4	2570		protein TANC1	4	1677
probable ubiquitin carboxyl-terminal hydrolase FAF-X	4	2554		palmitoyltransferase ZDHHC23	4	424
echinoderm microtubule-associated protein-like 6	4	1958		protocadherin Fat 1	4	4588
solute carrier family 26 member 6	4	738		PDZ domain-containing protein 2	4	2542
pyruvate carboxylase, mitochondrial	4	1178		centrosomal protein of 162 kDa	4	1327
histone-lysine N-methyltransferase NSD2	4	1365		midasin	4	3744
sodium/hydrogen exchanger 6	4	701		anillin	4	1142
glutamate receptor 4	4	884		anillin	4	1105
nuclear receptor corepressor 2	4	2458		myomesin-2	4	1445
cubilin	4	3623		WASH complex subunit 2A	4	1290
laminin subunit alpha-2	4	3118		1-phosphatidylinositol 4,5-bisphosphate phosphodiesterase epsilon-1	4	2316
lysophospholipid acyltransferase 1	4	495		1-phosphatidylinositol 4,5-bisphosphate phosphodiesterase epsilon-1	4	2315
MAX gene-associated protein	4	2856		1-phosphatidylinositol 4,5-bisphosphate phosphodiesterase epsilon-1	4	2300
RB1-inducible coiled-coil protein 1	4	1591		multimerin-2	4	888
glutamate receptor 2	4	883		disks large homolog 5	4	1342
glutamate receptor 2	4	836		neuron navigator 2	4	2465
protein kintoun	4	789		neuron navigator 2	4	2455
coatomer subunit alpha	4	1233		neuron navigator 2	4	2416
roquin-2	4	1191		glutamate receptor 4	4	902
maestro heat-like repeat-containing protein family member 6	4	719		histone-lysine N-methyltransferase 2A	4	3133
histone-lysine N-methyltransferase MECOM	4	1116		protein FAM186B	4	862
histone-lysine N-methyltransferase MECOM	4	1051		E3 ubiquitin-protein ligase MYCBP2	4	4789
laminin subunit alpha-4	4	1823		E3 ubiquitin-protein ligase MYCBP2	4	4737
laminin subunit alpha-4	4	1816		E3 ubiquitin-protein ligase MYCBP2	4	4703
neuron navigator 2	4	2365		E3 ubiquitin-protein ligase MYCBP2	4	4689
neuron navigator 2	4	1493		E3 ubiquitin-protein ligase MYCBP2	4	4752
homeodomain-interacting protein kinase 2	4	1171		neurobeachin	4	2962
glutamate receptor 1	4	906		neurobeachin	4	2938
coiled-coil domain-containing protein 17	4	622		neurobeachin	4	2943
voltage-dependent P/Q-type calcium channel subunit alpha-1A	4	2261		inositol hexakisphosphate and diphosphoinositol-pentakisphosphate kinase 1	4	1366
voltage-dependent P/Q-type calcium channel subunit alpha-1A	4	2506		hydrocephalus-inducing protein homolog	4	5138
laminin subunit alpha-3	4	3277		chromodomain-helicase-DNA-binding protein 3	4	2025
zinc finger E-box-binding homeobox 1	4	1108		nuclear receptor corepressor 1	4	2524
lipase member M	4	423		nuclear receptor corepressor 1	4	2523
inositol hexakisphosphate and diphosphoinositol-pentakisphosphate kinase 1	4	1433		nuclear receptor corepressor 1	4	2511
inositol hexakisphosphate and diphosphoinositol-pentakisphosphate kinase 1	4	1408		nuclear receptor corepressor 1	4	2456
aggrecan core protein	4	2431		pleckstrin homology domain-containing family G member 2	4	1327
glutamate receptor ionotropic, NMDA 2A	4	1464		nuclear receptor coactivator 6	4	1975
glutamate receptor ionotropic, NMDA 2A	4	1281		uncharacterized protein KIAA1671	4	1806
arf-GAP with SH3 domain, ANK repeat and PH domain-containing protein 2	4	961		serine/threonine-protein kinase WNK3	4	1743
protein eyes shut homolog	4	3144		uncharacterized protein C1orf105	4	210
nuclear factor related to kappa-B-binding protein	4	1299		low-density lipoprotein receptor-related protein 2	4	4612
dystonin	4	5675		low-density lipoprotein receptor-related protein 2	4	3892
dystonin	4	5537		nebulin	4	8277
protein sidekick-2	4	2172		nebulin	4	7796
phosphatidylinositol phosphatase PTPRQ	4	2299		anaphase-promoting complex subunit 1	4	1948
uncharacterized protein KIAA1671	4	1806		protein TANC1	4	1755
histone-lysine N-methyltransferase SETDB1	4	1291		protein TANC1	4	1554
apoptotic protease-activating factor 1	4	1194		palmitoyltransferase ZDHHC23	4	435
otoancorin	4	1060		palmitoyltransferase ZDHHC23	4	412
histone-lysine N-methyltransferase MECOM	4	1043		anaphase-promoting complex subunit 4	4	697
histone-lysine N-methyltransferase MECOM	4	1042		PDZ domain-containing protein 2	4	2873
versican core protein	4	2409		PDZ domain-containing protein 2	4	2873
MAX gene-associated protein	4	3065		PDZ domain-containing protein 2	4	2861
nebulin	4	8525		PDZ domain-containing protein 2	4	2839
nebulin	4	8525		PDZ domain-containing protein 2	4	2781
apoptotic chromatin condensation inducer in the nucleus	4	1328		little elongation complex subunit 1	4	2139
apoptotic chromatin condensation inducer in the nucleus	4	614		ciliogenesis and planar polarity effector 1	4	3251
apoptotic chromatin condensation inducer in the nucleus	4	583		ciliogenesis and planar polarity effector 1	4	3251
neurabin-1	4	1374		ciliogenesis and planar polarity effector 1	4	3233
neurabin-1	4	1296		ciliogenesis and planar polarity effector 1	4	3215
neurabin-1	4	1253		ciliogenesis and planar polarity effector 1	4	3199
glutamate receptor ionotropic, kainate 2	4	892		ciliogenesis and planar polarity effector 1	4	3145
protein strawberry notch homolog 1	4	1393		ciliogenesis and planar polarity effector 1	4	3023
protocadherin-11 X-linked	4	1339		fibrocystin	4	3837
protocadherin-11 X-linked	4	1065		fibrocystin	4	3278
protocadherin-11 X-linked	4	1310		dystonin	4	7794
protocadherin-11 X-linked	4	1329		ATP-binding cassette sub-family A member 13	4	4861
chromodomain-helicase-DNA-binding protein 8	4	2581		ATP-binding cassette sub-family A member 13	4	4468
N(4)-(beta-N-acetylglucosaminyl)-L-asparaginase	4	336		ATP-binding cassette sub-family A member 13	4	4456
golgin subfamily A member 3	4	1134		ATP-binding cassette sub-family A member 13	4	4329
voltage-dependent P/Q-type calcium channel subunit alpha-1A	4	2263		ATP-binding cassette sub-family A member 13	4	4298
zinc finger E-box-binding homeobox 1	4	1104		ATP-binding cassette sub-family A member 13	4	4030
zinc finger E-box-binding homeobox 1	4	1107		ATP-binding cassette sub-family A member 13	4	4024
zinc finger E-box-binding homeobox 1	4	1057		ATP-binding cassette sub-family A member 13	4	3781
zinc finger E-box-binding homeobox 1	4	1125		ATP-binding cassette sub-family A member 13	4	3717
sodium/hydrogen exchanger 6	4	649		ATP-binding cassette sub-family A member 13	4	3424
RING finger protein 17	4	1619		ATP-binding cassette sub-family A member 13	4	3341
serine/threonine-protein kinase ATR	4	2644		ATP-binding cassette sub-family A member 13	4	3341
coiled-coil domain-containing protein 17	4	613		maltase-glucoamylase, intestinal	4	2753
inositol hexakisphosphate and diphosphoinositol-pentakisphosphate kinase 1	4	1406		maltase-glucoamylase, intestinal	4	2753
nuclear receptor corepressor 1	4	2337		maltase-glucoamylase, intestinal	4	2753
E3 ubiquitin-protein ligase LRSAM1	4	696		maltase-glucoamylase, intestinal	4	2753
nuclear pore glycoprotein p62	4	522		putative maltase-glucoamylase-like protein FLJ16351	4	2245
cilia- and flagella-associated protein 57	4	1283		putative maltase-glucoamylase-like protein FLJ16351	4	1660
leptin receptor	4	958		putative maltase-glucoamylase-like protein FLJ16351	4	1277
calcineurin-binding protein cabin-1	4	2220		maestro heat-like repeat-containing protein family member 6	4	680
uromodulin-like 1	4	1374		maestro heat-like repeat-containing protein family member 6	4	675
uromodulin-like 1	4	1246		fibrocystin-L	4	4243
interleukin-7	4	133		RB1-inducible coiled-coil protein 1	4	1594
interleukin-7	4	159		RB1-inducible coiled-coil protein 1	4	1587
interleukin-7	4	115		RB1-inducible coiled-coil protein 1	4	1584
calcineurin-binding protein cabin-1	4	2170		RB1-inducible coiled-coil protein 1	4	1542
BIVM-ERCC5 protein	4	1640		RB1-inducible coiled-coil protein 1	4	1479
histone-lysine N-methyltransferase MECOM	4	1051		protein unc-13 homolog B	4	1989
VPS10 domain-containing receptor SorCS1	4	1179		protein unc-13 homolog B	4	1971
VPS10 domain-containing receptor SorCS1	4	1130		hemicentin-2	4	5038
VPS10 domain-containing receptor SorCS1	4	1159		hemicentin-2	4	5035
VPS10 domain-containing receptor SorCS1	4	1179		hemicentin-2	4	5020
nuclear receptor corepressor 2	4	2504		hemicentin-2	4	4790
DENN domain-containing protein 5A	4	1241		neuron navigator 2	4	2485
neuron navigator 2	4	2488		neuron navigator 2	4	2466
glutaminase kidney	4	598		neuron navigator 2	4	2452
syndetin	4	934		neuron navigator 2	4	2451
glutamate receptor 1	4	826		neuron navigator 2	4	2445
glutamate receptor 1	4	811		neuron navigator 2	4	2430
glutamate receptor 1	4	916		neuron navigator 2	4	2418
glutamate receptor 1	4	916		neuron navigator 2	4	2395
glutamate receptor 1	4	837		IQ motif and SEC7 domain-containing protein 3	4	1063
disheveled-associated activator of morphogenesis 1	4	1068		protein dispatched homolog 2	4	1401
hydrocephalus-inducing protein homolog	4	5121		inositol hexakisphosphate and diphosphoinositol-pentakisphosphate kinase 1	4	1479
nebulin	4	8560		inositol hexakisphosphate and diphosphoinositol-pentakisphosphate kinase 1	4	1479
thyroid adenoma-associated protein	4	937		inositol hexakisphosphate and diphosphoinositol-pentakisphosphate kinase 1	4	1479
thyroid adenoma-associated protein	4	894		inositol hexakisphosphate and diphosphoinositol-pentakisphosphate kinase 1	4	1479
slit homolog 3 protein	4	1530		carbohydrate sulfotransferase 6	4	395
SKI family transcriptional corepressor 2	4	1015		hydrocephalus-inducing protein homolog	4	5182
probable E3 ubiquitin-protein ligase HERC4	4	979		hydrocephalus-inducing protein homolog	4	5172
probable E3 ubiquitin-protein ligase HERC4	4	794		hydrocephalus-inducing protein homolog	4	5155
nuclear pore complex protein Nup153	4	1506		hydrocephalus-inducing protein homolog	4	5148
protein MON2 homolog	4	1645		transport and Golgi organization protein 6 homolog	4	942
WD repeat and SOCS box-containing protein 2	4	421		nuclear receptor corepressor 1	4	2524
elastin	4	658		nuclear receptor corepressor 1	4	2523
solute carrier family 26 member 6	4	723		nuclear receptor corepressor 1	4	2405
solute carrier family 26 member 6	4	651		nuclear receptor corepressor 1	4	2337
FH1/FH2 domain-containing protein 3	4	1422		protein sidekick-2	4	2153
signal-induced proliferation-associated 1-like protein 1	4	1783		protein sidekick-2	4	2135
signal-induced proliferation-associated 1-like protein 1	4	1782		ubiquitin carboxyl-terminal hydrolase 32	4	1634
signal-induced proliferation-associated 1-like protein 1	4	1803		ubiquitin carboxyl-terminal hydrolase 32	4	1620
anillin	4	1087		ubiquitin carboxyl-terminal hydrolase 32	4	1618
anillin	4	1086		ubiquitin carboxyl-terminal hydrolase 32	4	1615
centrosomal protein of 162 kDa	4	1327		ubiquitin carboxyl-terminal hydrolase 32	4	1608
protein FAM214A	4	1083		ubiquitin carboxyl-terminal hydrolase 32	4	1601
anaphase-promoting complex subunit 4	4	809		ubiquitin carboxyl-terminal hydrolase 32	4	1572
dynein regulatory complex subunit 7	4	809		laminin subunit alpha-3	4	3342
MMS19 nucleotide excision repair protein homolog	4	871		laminin subunit alpha-3	4	3339
MMS19 nucleotide excision repair protein homolog	4	1030		laminin subunit alpha-3	4	3336
filamin-A-interacting protein 1	4	1216		laminin subunit alpha-3	4	3298
dedicator of cytokinesis protein 10	4	2180		laminin subunit alpha-3	4	3243
sorbin and SH3 domain-containing protein 1	4	1266		FH1/FH2 domain-containing protein 3	4	1467
catenin alpha-1	4	841		BRD4-interacting chromatin-remodeling complex-associated protein	4	1514
dmX-like protein 1	4	2854		BRD4-interacting chromatin-remodeling complex-associated protein	4	1501
hemicentin-2	4	5079		pleckstrin homology domain-containing family G member 2	4	1387
protein eyes shut homolog	4	3165		symplekin	4	1274
histone-lysine N-methyltransferase SETD5	4	1344		transcription factor-like 5 protein	4	530
WASH complex subunit 4	4	1174		nuclear receptor coactivator 6	4	2068
mitogen-activated protein kinase kinase kinase 6	4	1280		nuclear receptor coactivator 6	4	2057
filamin-A-interacting protein 1	4	1177		nuclear receptor coactivator 6	4	2056
transcription factor-like 5 protein	4	461		nuclear receptor-interacting protein 1	4	1158
protein prune homolog 2	4	3062		nuclear receptor-interacting protein 1	4	1158
protein prune homolog 2	4	3063		nuclear receptor-interacting protein 1	4	1158
TOG array regulator of axonemal microtubules protein 1	4	1773		nuclear receptor-interacting protein 1	4	1158
solute carrier family 22 member 5	4	581		nuclear receptor-interacting protein 1	4	1158
microtubule-associated protein 1S	4	1033		uromodulin-like 1	4	1268
nuclear receptor coactivator 6	4	2063		unconventional myosin-XVIIIb	4	2610
unconventional myosin-XVIIIb	4	2568		unconventional myosin-XVIIIb	4	2610
dynein assembly factor 1, axonemal	4	489		unconventional myosin-XVIIIb	4	2610
A disintegrin and metalloproteinase with thrombospondin motifs 9	4	1907		unconventional myosin-XVIIIb	4	2610
neuronal PAS domain-containing protein 4	4	592		unconventional myosin-XVIIIb	4	2609
Fanconi anemia group D2 protein	4	1451		unconventional myosin-XVIIIb	4	2163
palmitoyltransferase ZDHHC23	4	435		serine/threonine-protein kinase WNK3	4	1753
palmitoyltransferase ZDHHC23	4	435		protocadherin-11 X-linked	4	1376
palmitoyltransferase ZDHHC23	4	432		protocadherin-11 X-linked	4	1376
Bardet-Biedl syndrome 4 protein	4	496		protocadherin-11 X-linked	4	1368
E3 SUMO-protein ligase PIAS1	4	653		protocadherin-11 X-linked	4	1358
protein TASOR 2	4	2430		protocadherin-11 X-linked	4	1347
protein TASOR 2	4	2430		la-related protein 1B	4	1119
protein TASOR 2	4	2349		la-related protein 1B	4	1116
thyroid receptor-interacting protein 11	4	1978		la-related protein 1B	4	1103
Hermansky-Pudlak syndrome 1 protein	4	700		la-related protein 1B	4	1096
Hermansky-Pudlak syndrome 1 protein	4	700		la-related protein 1B	4	1092
Hermansky-Pudlak syndrome 1 protein	4	613		la-related protein 1B	4	1088
Hermansky-Pudlak syndrome 1 protein	4	613		la-related protein 1B	4	1076
Hermansky-Pudlak syndrome 1 protein	4	577		la-related protein 1B	4	1056
Hermansky-Pudlak syndrome 1 protein	4	577		dynein heavy chain 6, axonemal	4	4158
zinc finger E-box-binding homeobox 1	4	1111		dynein heavy chain 6, axonemal	4	4158
zinc finger E-box-binding homeobox 1	4	1110		dynein heavy chain 6, axonemal	4	4116
pleckstrin homology domain-containing family A member 7	4	1271		dynein heavy chain 6, axonemal	4	4109
pleckstrin homology domain-containing family A member 7	4	1122		dynein heavy chain 6, axonemal	4	4028
WASH complex subunit 2C	4	1341		dynein heavy chain 6, axonemal	4	3830
MMS19 nucleotide excision repair protein homolog	4	932		dynein heavy chain 6, axonemal	4	3737
sodium/hydrogen exchanger 6	4	617		baculoviral IAP repeat-containing protein 6	4	4779
protein phosphatase 1 regulatory subunit 12B	4	1043		baculoviral IAP repeat-containing protein 6	4	3989
protein unc-79 homolog	4	2685		dynein heavy chain 12, axonemal	4	3949
RNA polymerase-associated protein CTR9 homolog	4	1149		dynein heavy chain 12, axonemal	4	3939
neuroblast differentiation-associated protein AHNAK	4	5890		dynein heavy chain 12, axonemal	4	3913
neuroblast differentiation-associated protein AHNAK	4	5890		microtubule-associated protein 4	4	2325
baculoviral IAP repeat-containing protein 1	4	1403		microtubule-associated protein 4	4	2311
DENN domain-containing protein 5A	4	1263		microtubule-associated protein 4	4	2309
DENN domain-containing protein 5A	4	1191		microtubule-associated protein 4	4	2294
dmX-like protein 1	4	3027		microtubule-associated protein 4	4	2288
target of Nesh-SH3	4	1715		microtubule-associated protein 4	4	2239
target of Nesh-SH3	4	1645		histone-lysine N-methyltransferase SETD5	4	1500
histone-lysine N-methyltransferase SETD5	4	1344		histone-lysine N-methyltransferase SETD5	4	1500
protein TANC1	4	1660		histone-lysine N-methyltransferase SETD5	4	1481
dyslexia-associated protein KIAA0319	4	920		histone-lysine N-methyltransferase SETD5	4	1455
dyslexia-associated protein KIAA0319	4	920		histone-lysine N-methyltransferase SETD5	4	1350
MMS19 nucleotide excision repair protein homolog	4	1069		histone-lysine N-methyltransferase SETD5	4	1350
MMS19 nucleotide excision repair protein homolog	4	872		neurobeachin	4	2488
zinc finger protein 292	4	2583		M-phase phosphoprotein 8	4	879
pleckstrin homology domain-containing family G member 2	4	1237		midasin	4	5499
signal-induced proliferation-associated 1-like protein 1	4	1804		filamin-A-interacting protein 1	4	965
signal-induced proliferation-associated 1-like protein 1	4	1782		glutamate receptor ionotropic, kainate 2	4	892
signal-induced proliferation-associated 1-like protein 1	4	1782		laminin subunit alpha-2	4	3208
signal-induced proliferation-associated 1-like protein 1	4	1782		PH-interacting protein	4	1649
inositol hexakisphosphate and diphosphoinositol-pentakisphosphate kinase 1	4	1429		NHS-like protein 1	4	1672
inositol hexakisphosphate and diphosphoinositol-pentakisphosphate kinase 1	4	1429		NHS-like protein 1	4	1672
inositol hexakisphosphate and diphosphoinositol-pentakisphosphate kinase 1	4	1429		NHS-like protein 1	4	1625
inositol hexakisphosphate and diphosphoinositol-pentakisphosphate kinase 1	4	1429		NHS-like protein 1	4	1624
inositol hexakisphosphate and diphosphoinositol-pentakisphosphate kinase 1	4	1429		NHS-like protein 1	4	1618
inositol hexakisphosphate and diphosphoinositol-pentakisphosphate kinase 1	4	1421		NHS-like protein 1	4	1610
inositol hexakisphosphate and diphosphoinositol-pentakisphosphate kinase 1	4	1421		NHS-like protein 1	4	1607
inositol hexakisphosphate and diphosphoinositol-pentakisphosphate kinase 1	4	1421		NHS-like protein 1	4	1607
inositol hexakisphosphate and diphosphoinositol-pentakisphosphate kinase 1	4	1408		NHS-like protein 1	4	1548
inositol hexakisphosphate and diphosphoinositol-pentakisphosphate kinase 1	4	1408		DNA polymerase zeta catalytic subunit	4	2328
inositol hexakisphosphate and diphosphoinositol-pentakisphosphate kinase 1	4	1408		E3 ubiquitin-protein ligase HECTD1	4	2608
inositol hexakisphosphate and diphosphoinositol-pentakisphosphate kinase 1	4	1400		E3 ubiquitin-protein ligase HECTD1	4	2331
inositol hexakisphosphate and diphosphoinositol-pentakisphosphate kinase 1	4	1380		signal-induced proliferation-associated 1-like protein 1	4	1804
inositol hexakisphosphate and diphosphoinositol-pentakisphosphate kinase 1	4	1366		signal-induced proliferation-associated 1-like protein 1	4	1804
inositol hexakisphosphate and diphosphoinositol-pentakisphosphate kinase 1	4	1366		signal-induced proliferation-associated 1-like protein 1	4	1804
inositol hexakisphosphate and diphosphoinositol-pentakisphosphate kinase 1	4	1366		signal-induced proliferation-associated 1-like protein 1	4	1804
protocadherin-15	4	1718		WASH complex subunit 4	4	1128
roquin-2	4	1129		WASH complex subunit 4	4	985
roquin-2	4	1153		WASH complex subunit 4	4	859
serine/threonine-protein kinase ATR	4	2580		A disintegrin and metalloproteinase with thrombospondin motifs 20	4	1911
leucine-rich repeat-containing protein 9	4	1494		neuron navigator 3	4	2349
Kruppel-like factor 18	4	1052		neuron navigator 3	4	2342
zinc fingers and homeoboxes protein 2	4	837		neuron navigator 3	4	2186
dedicator of cytokinesis protein 10	4	2199		sorbin and SH3 domain-containing protein 1	4	1530
palmitoyltransferase ZDHHC23	4	412		sorbin and SH3 domain-containing protein 1	4	1505
glutamate receptor 1	4	915		sorbin and SH3 domain-containing protein 1	4	1380
glutamate receptor 1	4	837		sorbin and SH3 domain-containing protein 1	4	1141
nuclear pore complex protein Nup98-Nup96	4	1831		VPS10 domain-containing receptor SorCS1	4	1187
nuclear pore complex protein Nup98-Nup96	4	1792		WASH complex subunit 2C	4	1312
nuclear pore complex protein Nup98-Nup96	4	1783		WASH complex subunit 2C	4	1290
nuclear pore complex protein Nup98-Nup96	4	1753		WASH complex subunit 2C	4	1283
putative short-chain dehydrogenase/reductase family 42E member 2	4	626		lipase member M	4	430
histone-lysine N-methyltransferase, H3 lysine-36 specific	4	2427		1-phosphatidylinositol 4,5-bisphosphate phosphodiesterase epsilon-1	4	2316
dynein heavy chain 12, axonemal	4	3960		WD repeat- and FYVE domain-containing protein 4	4	2435
histone-lysine N-methyltransferase SETDB1	4	1292		WD repeat- and FYVE domain-containing protein 4	4	2045
histone-lysine N-methyltransferase SETDB1	4	1292		WD repeat- and FYVE domain-containing protein 4	4	1654
histone-lysine N-methyltransferase MECOM	4	1230		disks large homolog 5	4	1860
histone-lysine N-methyltransferase MECOM	4	1052		disks large homolog 5	4	1829
histone-lysine N-methyltransferase MECOM	4	1052		disks large homolog 5	4	1807
histone-lysine N-methyltransferase MECOM	4	1051		disks large homolog 5	4	1680
histone-lysine N-methyltransferase MECOM	4	1043		coiled-coil domain-containing protein 27	4	670
histone-lysine N-methyltransferase MECOM	4	1042		coiled-coil domain-containing protein 17	4	678
histone-lysine N-methyltransferase MECOM	4	1042		coiled-coil domain-containing protein 17	4	655
WASH complex subunit 2C	4	1362		coiled-coil domain-containing protein 17	4	402
WASH complex subunit 2C	4	1266		homeodomain-interacting protein kinase 1	4	1170
WASH complex subunit 2C	4	1265		AT-hook DNA-binding motif-containing protein 1	4	1603
WASH complex subunit 2C	4	1317		AT-hook DNA-binding motif-containing protein 1	4	1603
WASH complex subunit 2C	4	1288		AT-hook DNA-binding motif-containing protein 1	4	1603
WASH complex subunit 2C	4	1254		enoyl-[acyl-carrier-protein] reductase, mitochondrial	4	459
kinase suppressor of Ras 1	4	901		enoyl-[acyl-carrier-protein] reductase, mitochondrial	4	431
protocadherin Fat 3	4	4589		enoyl-[acyl-carrier-protein] reductase, mitochondrial	4	355
DNA-binding protein RFX7	4	1363		enoyl-[acyl-carrier-protein] reductase, mitochondrial	4	355
DNA-binding protein RFX7	4	1363		enoyl-[acyl-carrier-protein] reductase, mitochondrial	4	355
aggrecan core protein	4	2568		enoyl-[acyl-carrier-protein] reductase, mitochondrial	4	355
receptor-type tyrosine-protein phosphatase zeta	4	2308		enoyl-[acyl-carrier-protein] reductase, mitochondrial	4	355
receptor-type tyrosine-protein phosphatase zeta	4	2301		enoyl-[acyl-carrier-protein] reductase, mitochondrial	4	355
arf-GAP with Rho-GAP domain, ANK repeat and PH domain-containing protein 1	4	1194		enoyl-[acyl-carrier-protein] reductase, mitochondrial	4	355
WD repeat- and FYVE domain-containing protein 4	4	1614		enoyl-[acyl-carrier-protein] reductase, mitochondrial	4	355
fibroblast growth factor receptor-like 1	4	504		glutamate receptor 4	4	884
DNA-binding protein RFX7	4	1281		glutamate receptor 4	4	732
DNA-binding protein RFX7	4	1460		glutamate receptor 4	4	732
protein unc-13 homolog B	4	1990		histone-lysine N-methyltransferase 2A	4	3166
protein unc-13 homolog B	4	4340		dmX-like protein 1	4	3086
AT-hook DNA-binding motif-containing protein 1	4	1603		dmX-like protein 1	4	3086
dynein heavy chain 10, axonemal	4	4589		dmX-like protein 1	4	2913
dynein heavy chain 6, axonemal	4	4158		dmX-like protein 1	4	2913
Fanconi anemia group D2 protein	4	1414		otoancorin	4	798
Fanconi anemia group D2 protein	4	1458		serine/threonine-protein kinase SMG1	4	3688
dystonin	4	5375		coiled-coil domain-containing protein 27	4	747
multiple PDZ domain protein	4	1934		coiled-coil domain-containing protein 27	4	733
target of Nesh-SH3	4	1786		coiled-coil domain-containing protein 27	4	696
target of Nesh-SH3	4	1772		coiled-coil domain-containing protein 27	4	663
ATP-binding cassette sub-family A member 10	4	1543		coiled-coil domain-containing protein 27	4	629
piezo-type mechanosensitive ion channel component 2	4	2865		coiled-coil domain-containing protein 17	4	669
cilia- and flagella-associated protein 57	4	1250		coiled-coil domain-containing protein 17	4	646
cadherin EGF LAG seven-pass G-type receptor 1	4	3019		coiled-coil domain-containing protein 17	4	645
glutamate receptor 2	4	836		coiled-coil domain-containing protein 17	4	642
glutamate receptor 2	4	836		coiled-coil domain-containing protein 17	4	613
sodium/hydrogen exchanger 6	4	679		coiled-coil domain-containing protein 17	4	385
neurobeachin	4	2964		coiled-coil domain-containing protein 17	4	385
glutamyl aminopeptidase	4	941		protein phosphatase 1 regulatory subunit 12B	4	1042
E3 ubiquitin-protein ligase LRSAM1	4	723		protein phosphatase 1 regulatory subunit 12B	4	981
E3 ubiquitin-protein ligase LRSAM1	4	690		protein phosphatase 1 regulatory subunit 12B	4	788
sorbin and SH3 domain-containing protein 1	4	1304		enoyl-[acyl-carrier-protein] reductase, mitochondrial	4	355
sorbin and SH3 domain-containing protein 1	4	1326		enoyl-[acyl-carrier-protein] reductase, mitochondrial	4	355
sorbin and SH3 domain-containing protein 1	4	1326		pecanex-like protein 2	4	1934
dipeptidyl peptidase 9	4	812		dynein heavy chain 6, axonemal	4	4067
ciliogenesis and planar polarity effector 1	4	3251		dynein heavy chain 6, axonemal	4	3737
neurobeachin	4	2967		dynein heavy chain 6, axonemal	4	3737
protein FAM214A	4	1076		receptor tyrosine-protein kinase erbB-4	4	1349
protein FAM214A	4	1076		receptor tyrosine-protein kinase erbB-4	4	1334
protein FAM214A	4	1076		receptor tyrosine-protein kinase erbB-4	4	1324
protein FAM214A	4	1076		nebulin	4	8488
protein FAM214A	4	1076		nebulin	4	8463
protein FAM214A	4	1076		nebulin	4	8370
protein FAM214A	4	1083		nebulin	4	8370
protein FAM214A	4	1060		nebulin	4	8339
protein FAM214A	4	1013		nebulin	4	8308
protein FAM214A	4	988		nebulin	4	8277
protein FAM214A	4	988		nebulin	4	8277
microtubule-associated protein 4	4	2219		nebulin	4	8184
microtubule-associated protein 4	4	2296		dedicator of cytokinesis protein 10	4	2245
microtubule-associated protein 4	4	2296		dedicator of cytokinesis protein 10	4	2236
microtubule-associated protein 4	4	2219		dedicator of cytokinesis protein 10	4	2232
microtubule-associated protein 4	4	2258		dedicator of cytokinesis protein 10	4	2230
dystonin	4	5491		dedicator of cytokinesis protein 10	4	2226
neuroblast differentiation-associated protein AHNAK	4	5890		dedicator of cytokinesis protein 10	4	2196
DNA damage-binding protein 1	4	1140		dedicator of cytokinesis protein 10	4	2197
laminin subunit alpha-4	4	1816		girdin	4	2026
laminin subunit beta-2	4	1798		girdin	4	2000
mucin-2	4	5289		girdin	4	1999
protein phosphatase 1 regulatory subunit 12B	4	982		girdin	4	1972
receptor-type tyrosine-protein phosphatase C	4	1306		girdin	4	1952
receptor-type tyrosine-protein phosphatase zeta	4	2315		baculoviral IAP repeat-containing protein 6	4	3983
solute carrier family 22 member 5	4	557		anaphase-promoting complex subunit 1	4	1921
slit homolog 3 protein	4	1523		anaphase-promoting complex subunit 1	4	1917
thimet oligopeptidase	4	689		anaphase-promoting complex subunit 1	4	1473
ubiquitin carboxyl-terminal hydrolase 4	4	963		protein TANC1	4	1773
nuclear receptor-interacting protein 1	4	1158		protein TANC1	4	1685
ras GTPase-activating-like protein IQGAP1	4	1657		dynein heavy chain 12, axonemal	4	3816
arf-GAP with SH3 domain, ANK repeat and PH domain-containing protein 2	4	1006		dynein heavy chain 12, axonemal	4	3460
myomesin-2	4	1465		palmitoyltransferase ZDHHC23	4	432
thyroid receptor-interacting protein 11	4	1979		palmitoyltransferase ZDHHC23	4	406
collagen alpha-1(XII) chain long	4	3063		palmitoyltransferase ZDHHC23	4	409
coatomer subunit alpha	4	1224		microtubule-associated protein 4	4	2310
low-density lipoprotein receptor-related protein 2	4	4655		microtubule-associated protein 4	4	2287
baculoviral IAP repeat-containing protein 1	4	1403		histone-lysine N-methyltransferase SETD5	4	1500
nebulin	4	6669		histone-lysine N-methyltransferase SETD5	4	1481
mitogen-activated protein kinase kinase kinase 6	4	1288		histone-lysine N-methyltransferase SETD5	4	1468
disks large homolog 5	4	1919		histone-lysine N-methyltransferase SETD5	4	1468
symplekin	4	1274		histone-lysine N-methyltransferase SETD5	4	1449
histone-lysine N-methyltransferase MECOM	4	1239		histone-lysine N-methyltransferase SETD5	4	1363
histone-lysine N-methyltransferase MECOM	4	1051		histone-lysine N-methyltransferase SETD5	4	1363
protocadherin Fat 1	4	4588		histone-lysine N-methyltransferase SETD5	4	1363
nucleolin	4	710		histone-lysine N-methyltransferase SETD5	4	1350
phospholipid-transporting ATPase ABCA1	4	2261		histone-lysine N-methyltransferase SETD5	4	1350
dmX-like protein 1	4	3027		histone-lysine N-methyltransferase SETD5	4	1274
laminin subunit gamma-2	4	1193		la-related protein 1B	4	1143
probable methyltransferase TARBP1	4	1621		la-related protein 1B	4	1115
chromodomain-helicase-DNA-binding protein 3	4	1966		dmX-like protein 1	4	3020
mitogen-activated protein kinase kinase kinase 1	4	1512		dmX-like protein 1	4	3020
polycystic kidney disease and receptor for egg jelly-related protein	4	2253		dmX-like protein 1	4	3020
bone morphogenetic protein 1	4	986		dmX-like protein 1	4	3017
nuclear factor related to kappa-B-binding protein	4	1324		dmX-like protein 1	4	2931
talin-1	4	2541		dmX-like protein 1	4	2913
nuclear receptor corepressor 2	4	2514		PDZ domain-containing protein 2	4	2607
sodium/hydrogen exchanger 6	4	669		PDZ domain-containing protein 2	4	2542
transcription factor-like 5 protein	4	500		little elongation complex subunit 1	4	1996
protein disulfide-isomerase A5	4	519		glutamate receptor 1	4	846
eIF-2-alpha kinase activator GCN1	4	2671		ciliogenesis and planar polarity effector 1	4	3188
follistatin-related protein 1	4	308		ciliogenesis and planar polarity effector 1	4	3188
zinc finger X-linked protein ZXDA	4	799		ciliogenesis and planar polarity effector 1	4	2920
glutamate receptor 3	4	894		ciliogenesis and planar polarity effector 1	4	2855
histone-lysine N-methyltransferase NSD2	4	629		sodium-dependent proline transporter	4	754
calcineurin-binding protein cabin-1	4	2220		sodium-dependent proline transporter	4	592
nuclear pore glycoprotein p62	4	522		sodium-dependent proline transporter	4	592
histone-lysine N-methyltransferase SETDB1	4	1290		sodium-dependent proline transporter	4	555
splicing factor 3B subunit 1	4	1304		slit homolog 3 protein	4	1460
aggrecan core protein	4	2530		centrosomal protein of 162 kDa	4	1365
apoptotic protease-activating factor 1	4	1237		centrosomal protein of 162 kDa	4	1327
anaphase-promoting complex subunit 4	4	808		laminin subunit alpha-2	4	3212
nuclear receptor coactivator 6	4	2063		laminin subunit alpha-2	4	1916
sodium-dependent proline transporter	4	636		laminin subunit alpha-4	4	1816
cadherin EGF LAG seven-pass G-type receptor 1	4	3014		fibrocystin	4	3837
proteasome activator complex subunit 4	4	1843		fibrocystin	4	2941
RNA polymerase-associated protein CTR9 homolog	4	1173		fibrocystin	4	2770
inositol hexakisphosphate and diphosphoinositol-pentakisphosphate kinase 1	4	1408		PH-interacting protein	4	1266
dedicator of cytokinesis protein 10	4	2186		PH-interacting protein	4	1266
kinetochore-associated protein 1	4	2209		NHS-like protein 1	4	1672
RB1-inducible coiled-coil protein 1	4	1594		NHS-like protein 1	4	1637
pecanex-like protein 2	4	2137		NHS-like protein 1	4	1622
centrosomal protein of 162 kDa	4	1403		NHS-like protein 1	4	1592
neuron navigator 3	4	2363		DNA polymerase zeta catalytic subunit	4	2254
glutaminase kidney	4	669		dystonin	4	7827
zinc fingers and homeoboxes protein 2	4	837		dystonin	4	7821
disheveled-associated activator of morphogenesis 1	4	1078		dystonin	4	7806
zinc finger protein 292	4	2723		dystonin	4	7797
TOG array regulator of axonemal microtubules protein 1	4	1720		dystonin	4	7790
DENN domain-containing protein 5A	4	1287		dystonin	4	7766
protein prune homolog 2	4	3088		dystonin	4	7749
arf-GAP with Rho-GAP domain, ANK repeat and PH domain-containing protein 1	4	1205		dystonin	4	7718
WASH complex subunit 4	4	1173		dystonin	4	7694
E3 ubiquitin-protein ligase HECTD1	4	2610		dystonin	4	7681
RNA polymerase II-associated protein 1	4	1393		dystonin	4	7657
dystonin	4	5171		ATP-binding cassette sub-family A member 13	4	4433
signal-induced proliferation-associated 1-like protein 1	4	1804		ATP-binding cassette sub-family A member 13	4	4396
probable E3 ubiquitin-protein ligase HERC4	4	1049		anillin	4	1138
neurobeachin	4	2946		anillin	4	1120
filamin-A-interacting protein 1	4	1213		anillin	4	1083
BRD4-interacting chromatin-remodeling complex-associated protein	4	1560		maltase-glucoamylase, intestinal	4	2753
E3 SUMO-protein ligase PIAS1	4	651		fibrocystin-L	4	4253
nuclear pore complex protein Nup98-Nup96	4	1800		fibrocystin-L	4	4215
nuclear pore glycoprotein p62	4	522		fibrocystin-L	4	4199
homeobox protein SIX4	4	781		fibrocystin-L	4	4152
stabilin-2	4	2551		RB1-inducible coiled-coil protein 1	4	1601
syndetin	4	964		RB1-inducible coiled-coil protein 1	4	1601
DNA excision repair protein ERCC-6-like	4	1250		RB1-inducible coiled-coil protein 1	4	1598
vacuolar protein sorting-associated protein 13C	4	3710		RB1-inducible coiled-coil protein 1	4	1594
protein TASOR 2	4	2430		RB1-inducible coiled-coil protein 1	4	1591
vacuolar protein sorting-associated protein 13B	4	4022		RB1-inducible coiled-coil protein 1	4	1591
PH-interacting protein	4	1821		RB1-inducible coiled-coil protein 1	4	1549
vacuolar protein sorting-associated protein 13C	4	3585		multiple PDZ domain protein	4	1461
protein kintoun	4	837		multiple PDZ domain protein	4	1167
microtubule-associated protein 1S	4	1059		proline rich transmembrane protein 1B	4	323
protein strawberry notch homolog 1	4	1392		sorbin and SH3 domain-containing protein 1	4	1168
WD repeat and SOCS box-containing protein 2	4	404		sorbin and SH3 domain-containing protein 1	4	1143
anillin	4	1124		sorbin and SH3 domain-containing protein 1	4	1112
laminin subunit gamma-2	4	1111		sorbin and SH3 domain-containing protein 1	4	1111
phospholipid-transporting ATPase ABCA7	4	2146		sorbin and SH3 domain-containing protein 1	4	1084
protein FAM214A	4	1076		sorbin and SH3 domain-containing protein 1	4	1046
manganese-transporting ATPase 13A1	4	1204		sorbin and SH3 domain-containing protein 1	4	1043
selenoprotein N	4	590		VPS10 domain-containing receptor SorCS1	4	1203
NHS-like protein 1	4	1610		VPS10 domain-containing receptor SorCS1	4	1159
ankyrin-1	4	1719		WASH complex subunit 2C	4	1300
reticulon-4	4	1192		WASH complex subunit 2C	4	1288
caskin-1	4	1431		WASH complex subunit 2A	4	1300
vacuolar protein sorting-associated protein 13C	4	3753		WASH complex subunit 2A	4	1283
zinc finger SWIM domain-containing protein 5	4	1185		1-phosphatidylinositol 4,5-bisphosphate phosphodiesterase epsilon-1	4	2316
serine/threonine-protein kinase WNK3	4	1800		1-phosphatidylinositol 4,5-bisphosphate phosphodiesterase epsilon-1	4	2316
ankyrin-3	4	4377		disks large homolog 5	4	1825
carbohydrate sulfotransferase 6	4	395		disks large homolog 5	4	1809
fibroblast growth factor receptor-like 1	4	504		protocadherin Fat 3	4	4612
glutamate receptor ionotropic, kainate 2	4	908		protocadherin Fat 3	4	4612
probable E3 ubiquitin-protein ligase HERC4	4	1057		protocadherin Fat 3	4	4592
pyruvate carboxylase, mitochondrial	4	1178		protocadherin Fat 3	4	4580
MMS19 nucleotide excision repair protein homolog	4	1030		protocadherin Fat 3	4	4395
histone-lysine N-methyltransferase, H3 lysine-36 specific	4	2696		protocadherin Fat 3	4	3540
anaphase-promoting complex subunit 1	4	1944		protocadherin Fat 3	4	3502
homeodomain-interacting protein kinase 2	4	1198		protocadherin Fat 3	4	3502
pleckstrin homology domain-containing family G member 2	4	1386		pleckstrin homology domain-containing family A member 7	4	1189
DNA-binding protein RFX7	4	1460		pleckstrin homology domain-containing family A member 7	4	1149
baculoviral IAP repeat-containing protein 1	4	1241		neuronal PAS domain-containing protein 4	4	879
solute carrier family 26 member 6	4	759		neuronal PAS domain-containing protein 4	4	523
voltage-dependent P/Q-type calcium channel subunit alpha-1A	4	2512		glutamate receptor 4	4	814
ciliogenesis and planar polarity effector 1	4	3197		glutamate receptor 4	4	771
transport and Golgi organization protein 6 homolog	4	1094		glutamate receptor 4	4	732
importin-4	4	1081		neuron navigator 2	4	2424
multimerin-2	4	949		neuron navigator 2	4	2415
phosphatidylinositol 3,4,5-trisphosphate-dependent Rac exchanger 2 protein	4	1606		neuron navigator 2	4	2401
dedicator of cytokinesis protein 5	4	1870		neuron navigator 2	4	2343
A disintegrin and metalloproteinase with thrombospondin motifs 20	4	1910		neuron navigator 2	4	2343
FH1/FH2 domain-containing protein 3	4	1439		neuron navigator 2	4	2143
zinc finger E-box-binding homeobox 1	4	1124		protein MON2 homolog	4	1646
RING finger protein 17	4	1623		protein MON2 homolog	4	1646
gasdermin-C	4	508		protein MON2 homolog	4	1646
ubiquitin carboxyl-terminal hydrolase 32	4	1604		phosphatidylinositol phosphatase PTPRQ	4	2536
unconventional myosin-XVIIIb	4	2567		phosphatidylinositol phosphatase PTPRQ	4	2533
hepatitis A virus cellular receptor 2	4	301		neuron navigator 3	4	2378
protocadherin-11 X-linked	4	1347		neuron navigator 3	4	2364
protocadherin-11 X-linked	4	1337		neuron navigator 3	4	2328
Bardet-Biedl syndrome 4 protein	4	519		neuron navigator 3	4	2305
Fanconi anemia group D2 protein	4	1471		neuron navigator 3	4	2222
helicase with zinc finger domain 2	4	2080		neuron navigator 3	4	2208
protein dispatched homolog 2	4	1401		neuron navigator 3	4	2179
coiled-coil domain-containing protein 97	4	343		neuron navigator 3	4	1885
ATP-binding cassette sub-family A member 10	4	1543		neuron navigator 3	4	1842
histone-lysine N-methyltransferase NSD2	4	1365		neuron navigator 3	4	1722
histone-lysine N-methyltransferase NSD2	4	1365		neuron navigator 3	4	1708
histone-lysine N-methyltransferase NSD2	4	647		neuron navigator 3	4	1700
histone-lysine N-methyltransferase NSD2	4	1365		E3 ubiquitin-protein ligase MYCBP2	4	4736
titin	4	5604		E3 ubiquitin-protein ligase MYCBP2	4	4730
solute carrier family 26 member 6	4	758		E3 ubiquitin-protein ligase MYCBP2	4	4719
solute carrier family 26 member 6	4	740		E3 ubiquitin-protein ligase MYCBP2	4	4667
E3 ubiquitin-protein ligase LRSAM1	4	723		E3 ubiquitin-protein ligase MYCBP2	4	4659
nuclear pore complex protein Nup98-Nup96	4	1726		E3 ubiquitin-protein ligase MYCBP2	4	4655
thiosulfate sulfurtransferase/rhodanese-like domain-containing protein 2	4	516		E3 ubiquitin-protein ligase MYCBP2	4	4642
kinetochore scaffold 1	4	2316		E3 ubiquitin-protein ligase MYCBP2	4	4637
otoancorin	4	1139		E3 ubiquitin-protein ligase MYCBP2	4	4619
neuron navigator 2	4	2429		E3 ubiquitin-protein ligase MYCBP2	4	4603
xin actin-binding repeat-containing protein 2	4	3549		E3 ubiquitin-protein ligase MYCBP2	4	4600
coiled-coil domain-containing protein 27	4	656		neurobeachin	4	2961
vacuolar protein sorting-associated protein 13B	4	3997		neurobeachin	4	2940
cilia- and flagella-associated protein 47	4	976		neurobeachin	4	2860
homeodomain-interacting protein kinase 1	4	1075		E3 ubiquitin-protein ligase HECTD1	4	2563
kinesin-like protein KIF19	4	998		E3 ubiquitin-protein ligase HECTD1	4	2561
nuclear pore glycoprotein p62	4	522		E3 ubiquitin-protein ligase HECTD1	4	2331
nuclear pore glycoprotein p62	4	522		E3 ubiquitin-protein ligase HECTD1	4	2329
kinetochore scaffold 1	4	2342		E3 ubiquitin-protein ligase HECTD1	4	2329
otoancorin	4	815		signal-induced proliferation-associated 1-like protein 1	4	1804
histone-lysine N-methyltransferase, H3 lysine-36 specific	4	2427		signal-induced proliferation-associated 1-like protein 1	4	1804
tau-tubulin kinase 2	4	1244		signal-induced proliferation-associated 1-like protein 1	4	1804
uromodulin-like 1	4	1446		signal-induced proliferation-associated 1-like protein 1	4	1804
palmitoyltransferase ZDHHC23	4	409		signal-induced proliferation-associated 1-like protein 1	4	1804
immunoglobulin superfamily member 22	4	1326		signal-induced proliferation-associated 1-like protein 1	4	1803
pleckstrin homology domain-containing family A member 7	4	1121		thyroid receptor-interacting protein 11	4	1744
glutamate receptor ionotropic, kainate 2	4	869		thyroid receptor-interacting protein 11	4	1537
fibrocystin-L	4	4243		kinetochore scaffold 1	4	2208
stAR-related lipid transfer protein 13	4	1105		protein dispatched homolog 2	4	1401
PDZ domain-containing protein 2	4	2839		inositol hexakisphosphate and diphosphoinositol-pentakisphosphate kinase 1	4	1479
neuronal PAS domain-containing protein 4	4	802		inositol hexakisphosphate and diphosphoinositol-pentakisphosphate kinase 1	4	1479
apoptotic protease-activating factor 1	4	1248		inositol hexakisphosphate and diphosphoinositol-pentakisphosphate kinase 1	4	1479
apoptotic protease-activating factor 1	4	1205		inositol hexakisphosphate and diphosphoinositol-pentakisphosphate kinase 1	4	1471
periaxin	4	1461		inositol hexakisphosphate and diphosphoinositol-pentakisphosphate kinase 1	4	1458
A disintegrin and metalloproteinase with thrombospondin motifs 9	4	1935		inositol hexakisphosphate and diphosphoinositol-pentakisphosphate kinase 1	4	1429
neuron navigator 2	4	2432		inositol hexakisphosphate and diphosphoinositol-pentakisphosphate kinase 1	4	1416
dystonin	4	5497		inositol hexakisphosphate and diphosphoinositol-pentakisphosphate kinase 1	4	1408
laminin subunit alpha-3	4	3333		inositol hexakisphosphate and diphosphoinositol-pentakisphosphate kinase 1	4	1400
protein FAM83H	4	1179		inositol hexakisphosphate and diphosphoinositol-pentakisphosphate kinase 1	4	1366
dynein heavy chain 10, axonemal	4	4471		NLR family CARD domain-containing protein 3	4	951
AT-hook DNA-binding motif-containing protein 1	4	1603		serine/threonine-protein kinase SMG1	4	3663
AT-hook DNA-binding motif-containing protein 1	4	1603		general transcription factor 3C polypeptide 1	4	2046
AT-hook DNA-binding motif-containing protein 1	4	1603		hydrocephalus-inducing protein homolog	4	5161
AT-hook DNA-binding motif-containing protein 1	4	1603		putative short-chain dehydrogenase/reductase family 42E member 2	4	626
AT-hook DNA-binding motif-containing protein 1	4	1603		putative short-chain dehydrogenase/reductase family 42E member 2	4	552
glutaminase kidney	4	559		chromodomain-helicase-DNA-binding protein 3	4	2055
nebulin	4	8494		chromodomain-helicase-DNA-binding protein 3	4	2050
nebulin	4	8494		kinesin-like protein KIF19	4	1012
nebulin	4	8494		kinesin-like protein KIF19	4	1011
nebulin	4	8494		kinesin-like protein KIF19	4	970
nebulin	4	8494		kinesin-like protein KIF19	4	969
nebulin	4	8463		kinesin-like protein KIF19	4	956
nebulin	4	8463		kinesin-like protein KIF19	4	950
nebulin	4	8463		kinesin-like protein KIF19	4	949
nebulin	4	8432		kinesin-like protein KIF19	4	908
nebulin	4	8401		kinesin-like protein KIF19	4	907
nebulin	4	8401		ubiquitin carboxyl-terminal hydrolase 32	4	1558
nebulin	4	8370		nuclear receptor corepressor 1	4	2524
nebulin	4	8370		nuclear receptor corepressor 1	4	2524
nebulin	4	8370		nuclear receptor corepressor 1	4	2524
nebulin	4	8339		nuclear receptor corepressor 1	4	2524
nebulin	4	8308		nuclear receptor corepressor 1	4	2523
nebulin	4	8308		nuclear receptor corepressor 1	4	2523
nebulin	4	8282		nuclear receptor corepressor 1	4	2523
nebulin	4	8282		nuclear receptor corepressor 1	4	2515
nebulin	4	8277		nuclear receptor corepressor 1	4	2515
nebulin	4	7553		nuclear receptor corepressor 1	4	2515
histone-lysine N-methyltransferase MECOM	4	1240		nuclear receptor corepressor 1	4	2515
histone-lysine N-methyltransferase MECOM	4	1231		nuclear receptor corepressor 1	4	2515
histone-lysine N-methyltransferase MECOM	4	1052		nuclear receptor corepressor 1	4	2515
palmitoyltransferase ZDHHC23	4	409		nuclear receptor corepressor 1	4	2514
target of Nesh-SH3	4	1774		nuclear receptor corepressor 1	4	2514
target of Nesh-SH3	4	1773		nuclear receptor corepressor 1	4	2514
target of Nesh-SH3	4	1771		nuclear receptor corepressor 1	4	2514
target of Nesh-SH3	4	1769		nuclear receptor corepressor 1	4	2514
target of Nesh-SH3	4	1768		nuclear receptor corepressor 1	4	2514
target of Nesh-SH3	4	1768		nuclear receptor corepressor 1	4	2465
target of Nesh-SH3	4	1767		nuclear receptor corepressor 1	4	2456
target of Nesh-SH3	4	1754		nuclear receptor corepressor 1	4	2404
target of Nesh-SH3	4	1747		nuclear receptor corepressor 1	4	2347
target of Nesh-SH3	4	1746		laminin subunit alpha-3	4	2626
target of Nesh-SH3	4	1745		FH1/FH2 domain-containing protein 3	4	1447
target of Nesh-SH3	4	1744		pleckstrin homology domain-containing family G member 2	4	1374
target of Nesh-SH3	4	1735		pleckstrin homology domain-containing family G member 2	4	1371
target of Nesh-SH3	4	1725		coiled-coil domain-containing protein 97	4	428
target of Nesh-SH3	4	1706		nuclear receptor coactivator 6	4	2087
target of Nesh-SH3	4	1678		nuclear receptor coactivator 6	4	2087
target of Nesh-SH3	4	1657		nuclear receptor coactivator 6	4	2086
histone-lysine N-methyltransferase NSD2	4	1365		nuclear receptor coactivator 6	4	2082
histone-lysine N-methyltransferase NSD2	4	1296		nuclear receptor coactivator 6	4	2058
histone-lysine N-methyltransferase NSD2	4	647		nuclear receptor coactivator 6	4	2051
PDZ domain-containing protein 2	4	2873		nuclear receptor coactivator 6	4	1999
PDZ domain-containing protein 2	4	2699		nuclear receptor coactivator 6	4	1907
PDZ domain-containing protein 2	4	2699		nuclear receptor coactivator 6	4	1651
ciliogenesis and planar polarity effector 1	4	3250		nuclear receptor coactivator 6	4	1650
ciliogenesis and planar polarity effector 1	4	3250		nuclear receptor-interacting protein 1	4	1158
ciliogenesis and planar polarity effector 1	4	3214		nuclear receptor-interacting protein 1	4	1158
ciliogenesis and planar polarity effector 1	4	3208		nuclear receptor-interacting protein 1	4	1158
centrosomal protein of 162 kDa	4	1365		nuclear receptor-interacting protein 1	4	1158
zinc finger protein 292	4	2583		uromodulin-like 1	4	1342
filamin-A-interacting protein 1	4	1213		unconventional myosin-XVIIIb	4	2610
filamin-A-interacting protein 1	4	1154		unconventional myosin-XVIIIb	4	2610
PH-interacting protein	4	1820		unconventional myosin-XVIIIb	4	2609
zinc fingers and homeoboxes protein 2	4	837		unconventional myosin-XVIIIb	4	2566
protein prune homolog 2	4	3092		protocadherin-11 X-linked	4	1345
protein prune homolog 2	4	3091		protocadherin-11 X-linked	4	1376
protein prune homolog 2	4	3090		protocadherin-11 X-linked	4	1366
protein prune homolog 2	4	3088		protocadherin-11 X-linked	4	1308
protein prune homolog 2	4	3075		protocadherin-11 X-linked	4	1339
protein prune homolog 2	4	3060		serine/threonine-protein kinase WNK3	4	1800
phospholipid-transporting ATPase ABCA1	4	2263		serine/threonine-protein kinase WNK3	4	1800
phospholipid-transporting ATPase ABCA1	4	2203		serine/threonine-protein kinase WNK3	4	1800
protein TASOR 2	4	2670		serine/threonine-protein kinase WNK3	4	1800
protein TASOR 2	4	2430		serine/threonine-protein kinase WNK3	4	1790
protein TASOR 2	4	2521		protocadherin-11 Y-linked	4	1329
protein TASOR 2	4	2430		protocadherin-11 Y-linked	4	1329
protein TASOR 2	4	2430		protocadherin-11 Y-linked	4	1329
protein TASOR 2	4	2430		histone-lysine N-methyltransferase, H3 lysine-36 specific	4	2696
neuron navigator 2	4	1481		histone-lysine N-methyltransferase, H3 lysine-36 specific	4	2696
MAX gene-associated protein	4	3066		histone-lysine N-methyltransferase, H3 lysine-36 specific	4	2696
MAX gene-associated protein	4	2956		histone-lysine N-methyltransferase, H3 lysine-36 specific	4	2696
RNA polymerase II-associated protein 1	4	1393		histone-lysine N-methyltransferase, H3 lysine-36 specific	4	2556
inositol hexakisphosphate and diphosphoinositol-pentakisphosphate kinase 1	4	1408		histone-lysine N-methyltransferase, H3 lysine-36 specific	4	2427
polycystin-1	4	3288		histone-lysine N-methyltransferase, H3 lysine-36 specific	4	2427
genetic suppressor element 1	4	1925		histone-lysine N-methyltransferase, H3 lysine-36 specific	4	2427
genetic suppressor element 1	4	1852		histone-lysine N-methyltransferase, H3 lysine-36 specific	4	2344
carbohydrate sulfotransferase 6	4	395		ciliogenesis and planar polarity effector 1	4	3188
chromodomain-helicase-DNA-binding protein 3	4	2060		ciliogenesis and planar polarity effector 1	4	3145
nuclear receptor corepressor 1	4	2524		ciliogenesis and planar polarity effector 1	4	3027
nuclear receptor corepressor 1	4	2523		ciliogenesis and planar polarity effector 1	4	2920
nuclear receptor corepressor 1	4	2515		sodium-dependent proline transporter	4	592
nuclear receptor corepressor 1	4	2514		glutamate receptor ionotropic, kainate 2	4	892
nuclear receptor corepressor 1	4	2466		glutamate receptor ionotropic, kainate 2	4	869
nuclear receptor corepressor 1	4	2448		AT-hook DNA-binding motif-containing protein 1	4	1603
kinesin-like protein KIF19	4	999		NHS-like protein 1	4	1447
kinesin-like protein KIF19	4	957		maltase-glucoamylase, intestinal	4	1857
FH1/FH2 domain-containing protein 3	4	1409		sorbin and SH3 domain-containing protein 1	4	1291
FH1/FH2 domain-containing protein 3	4	1401		sorbin and SH3 domain-containing protein 1	4	1182
BRD4-interacting chromatin-remodeling complex-associated protein	4	1560		protein enabled homolog	4	1104
pleckstrin homology domain-containing family G member 2	4	1386		protein enabled homolog	4	1100
symplekin	4	1274		protein enabled homolog	4	1083
transcription factor-like 5 protein	4	499		protein enabled homolog	4	1081
nuclear receptor-interacting protein 1	4	1158		protein enabled homolog	4	1079
nuclear receptor-interacting protein 1	4	1158		protein enabled homolog	4	1060
calcineurin-binding protein cabin-1	4	2255		pleckstrin homology domain-containing family A member 7	4	1365
calcineurin-binding protein cabin-1	4	2250		pleckstrin homology domain-containing family A member 7	4	1364
calcineurin-binding protein cabin-1	4	2225		pleckstrin homology domain-containing family A member 7	4	1339
calcineurin-binding protein cabin-1	4	2210		pleckstrin homology domain-containing family A member 7	4	1338
uncharacterized protein KIAA1671	4	1806		pleckstrin homology domain-containing family A member 7	4	1325
uncharacterized protein KIAA1671	4	1806		pleckstrin homology domain-containing family A member 7	4	1319
protocadherin Fat 1	4	4600		pleckstrin homology domain-containing family A member 7	4	1307
protocadherin Fat 1	4	4600		pleckstrin homology domain-containing family A member 7	4	1298
girdin	4	2027		pleckstrin homology domain-containing family A member 7	4	1272
laminin subunit beta-2	4	1798		pleckstrin homology domain-containing family A member 7	4	1271
histone-lysine N-methyltransferase SETD5	4	1442		pleckstrin homology domain-containing family A member 7	4	1259
neurobeachin	4	2941		pleckstrin homology domain-containing family A member 7	4	1259
glutamate receptor ionotropic, kainate 2	4	859		pleckstrin homology domain-containing family A member 7	4	1259
laminin subunit alpha-2	4	3210		pleckstrin homology domain-containing family A member 7	4	1259
laminin subunit alpha-2	4	3206		doublecortin domain-containing protein 1	4	1786
laminin subunit alpha-4	4	1823		doublecortin domain-containing protein 1	4	1786
laminin subunit alpha-4	4	1823		doublecortin domain-containing protein 1	4	1786
apoptotic chromatin condensation inducer in the nucleus	4	1340		doublecortin domain-containing protein 1	4	1786
apoptotic chromatin condensation inducer in the nucleus	4	583		doublecortin domain-containing protein 1	4	1768
disheveled-associated activator of morphogenesis 1	4	1078		doublecortin domain-containing protein 1	4	1741
disheveled-associated activator of morphogenesis 1	4	1078		doublecortin domain-containing protein 1	4	1718
E3 ubiquitin-protein ligase HECTD1	4	2610		doublecortin domain-containing protein 1	4	1686
signal-induced proliferation-associated 1-like protein 1	4	1804		doublecortin domain-containing protein 1	4	1546
homeobox protein SIX4	4	773		doublecortin domain-containing protein 1	4	1501
nck-associated protein 5-like	4	1289		doublecortin domain-containing protein 1	4	1458
neuron navigator 3	4	2356		neuron navigator 2	4	2424
transforming acidic coiled-coil-containing protein 2	4	2999		neurobeachin	4	2505
transforming acidic coiled-coil-containing protein 2	4	2969		protein AHNAK2	4	5695
transforming acidic coiled-coil-containing protein 2	4	2922		E3 ubiquitin-protein ligase HECTD1	4	2608
Hermansky-Pudlak syndrome 1 protein	4	700		E3 ubiquitin-protein ligase HECTD1	4	2549
WASH complex subunit 2A	4	1317		signal-induced proliferation-associated 1-like protein 1	4	1804
WASH complex subunit 2A	4	1312		signal-induced proliferation-associated 1-like protein 1	4	1803
MMS19 nucleotide excision repair protein homolog	4	872		signal-induced proliferation-associated 1-like protein 1	4	1783
multimerin-2	4	888		signal-induced proliferation-associated 1-like protein 1	4	1783
disks large homolog 5	4	1915		signal-induced proliferation-associated 1-like protein 1	4	1755
receptor-type tyrosine-protein phosphatase F	4	1922		signal-induced proliferation-associated 1-like protein 1	4	1734
receptor-type tyrosine-protein phosphatase F	4	1918		signal-induced proliferation-associated 1-like protein 1	4	1733
receptor-type tyrosine-protein phosphatase F	4	1909		protein FAM214A	4	1076
glutamate receptor 4	4	902		serine/threonine-protein kinase SMG1	4	3611
nuclear factor related to kappa-B-binding protein	4	1311		serine/threonine-protein kinase SMG1	4	3611
nuclear factor related to kappa-B-binding protein	4	1311		caskin-1	4	1360
dmX-like protein 1	4	3065		dynein heavy chain 2, axonemal	4	4531
probable ubiquitin carboxyl-terminal hydrolase FAF-X	4	2575		dynein heavy chain 2, axonemal	4	4531
probable ubiquitin carboxyl-terminal hydrolase FAF-X	4	2559		dynein heavy chain 2, axonemal	4	4468
probable methyltransferase TARBP1	4	1620		dynein heavy chain 2, axonemal	4	4449
pyruvate carboxylase, mitochondrial	4	1178		calcium/calmodulin-dependent protein kinase kinase 1	4	312
pyruvate carboxylase, mitochondrial	4	1178		dynein heavy chain 17, axonemal	4	3510
cilia- and flagella-associated protein 57	4	1239		nuclear receptor corepressor 1	4	2523
receptor-type tyrosine-protein phosphatase F	4	1922		nuclear receptor corepressor 1	4	2515
receptor-type tyrosine-protein phosphatase F	4	1913		nuclear receptor corepressor 1	4	2514
receptor-type tyrosine-protein phosphatase F	4	1820		transcription factor-like 5 protein	4	531
receptor-type tyrosine-protein phosphatase F	4	1811		transcription factor-like 5 protein	4	468
receptor-type tyrosine-protein phosphatase C	4	1258		transcription factor-like 5 protein	4	463
arf-GAP with SH3 domain, ANK repeat and PH domain-containing protein 2	4	1009		transcription factor-like 5 protein	4	462
arf-GAP with SH3 domain, ANK repeat and PH domain-containing protein 2	4	970		transcription factor-like 5 protein	4	426
arf-GAP with SH3 domain, ANK repeat and PH domain-containing protein 2	4	964		transcription factor-like 5 protein	4	317
dynein heavy chain 6, axonemal	4	4158		helicase with zinc finger domain 2	4	2677
glutaminase kidney	4	661		helicase with zinc finger domain 2	4	2674
nebulin	4	8370		protein TANC1	4	1678
nebulin	4	8370		microtubule-associated protein 4	4	2326
dedicator of cytokinesis protein 10	4	2206		microtubule-associated protein 4	4	2295
protein TANC1	4	1677		microtubule-associated protein 4	4	2294
palmitoyltransferase ZDHHC23	4	424		microtubule-associated protein 4	4	2280
target of Nesh-SH3	4	1742		microtubule-associated protein 4	4	2254
target of Nesh-SH3	4	1731		microtubule-associated protein 4	4	2253
target of Nesh-SH3	4	1721		histone-lysine N-methyltransferase SETD5	4	1487
histone-lysine N-methyltransferase NSD2	4	647		histone-lysine N-methyltransferase SETD5	4	1379
protocadherin Fat 1	4	4588		homeodomain-interacting protein kinase 1	4	1210
PDZ domain-containing protein 2	4	2542		fibroblast growth factor receptor-like 1	4	527
lysophospholipid acyltransferase 1	4	463		fibroblast growth factor receptor-like 1	4	504
centrosomal protein of 162 kDa	4	1327		alpha-2-macroglobulin	3	1474
anillin	4	1142		ankyrin-1	3	1880
anillin	4	1105		copper-transporting ATPase 1	3	1500
homeodomain-interacting protein kinase 2	4	1191		breast cancer type 2 susceptibility protein	3	3418
myomesin-2	4	1445		lysosomal-trafficking regulator	3	3801
protein prune homolog 2	4	3104		collagen alpha-1(VII) chain	3	2944
protein prune homolog 2	4	3103		fibrillin-1	3	2871
protein prune homolog 2	4	3101		gap junction alpha-1 protein	3	382
protein prune homolog 2	4	3101		glycine dehydrogenase (decarboxylating), mitochondrial	3	1020
protein prune homolog 2	4	3100		keratin, type I cytoskeletal 18	3	430
WASH complex subunit 2A	4	1290		peroxisome assembly protein 12	3	359
MMS19 nucleotide excision repair protein homolog	4	1029		phosphorylase b kinase regulatory subunit beta	3	1093
multimerin-2	4	888		polycystin-1	3	4302
disks large homolog 5	4	1579		elastin	3	724
disks large homolog 5	4	1342		eosinophil peroxidase	3	715
neuron navigator 2	4	2465		nitric oxide synthase, endothelial	3	1203
neuron navigator 2	4	2455		retinal dehydrogenase 1	3	501
neuron navigator 2	4	2416		pancreatic alpha-amylase	3	511
neuron navigator 2	4	1551		glutamate receptor ionotropic, kainate 1	3	918
neuron navigator 2	4	1493		glutamate receptor ionotropic, kainate 3	3	919
neuron navigator 2	4	1464		glutamate receptor ionotropic, NMDA 2A	3	1464
pyruvate carboxylase, mitochondrial	4	1178		pyruvate carboxylase, mitochondrial	3	1178
glutamate receptor 4	4	902		1-phosphatidylinositol 4,5-bisphosphate phosphodiesterase beta-3	3	1234
histone-lysine N-methyltransferase 2A	4	3133		NADPH--cytochrome P450 reductase	3	680
protein FAM186B	4	862		plasma membrane calcium-transporting ATPase 1	3	1176
kinetochore-associated protein 1	4	2209		solute carrier family 35 member E4	3	350
neurobeachin	4	2962		protein DENND6B	3	585
neurobeachin	4	2938		olfactory receptor 52N5	3	324
neurobeachin	4	2943		structural maintenance of chromosomes protein 4	3	1288
RING finger protein 17	4	1692		HMG domain-containing protein 4	3	601
RING finger protein 17	4	1672		erbin	3	1302
inositol hexakisphosphate and diphosphoinositol-pentakisphosphate kinase 1	4	1366		PR domain zinc finger protein 2	3	1481
hydrocephalus-inducing protein homolog	4	5138		40S ribosomal protein S13	3	151
chromodomain-helicase-DNA-binding protein 3	4	2025		alpha-amylase 1	3	511
nuclear receptor corepressor 1	4	2524		alpha-amylase 1	3	511
nuclear receptor corepressor 1	4	2523		alpha-amylase 1	3	511
nuclear receptor corepressor 1	4	2511		coiled-coil domain-containing protein 73	3	1079
nuclear receptor corepressor 1	4	2456		desmoplakin	3	2272
kinase suppressor of Ras 1	4	887		polycystin-1	3	4303
phospholipid-transporting ATPase ABCA7	4	2128		tetratricopeptide repeat protein 7B	3	843
phospholipid-transporting ATPase ABCA7	4	1636		putative transferase CAF17, mitochondrial	3	356
pleckstrin homology domain-containing family G member 2	4	1327		sodium/bile acid cotransporter 5	3	438
cyclin-P	4	397		DNA excision repair protein ERCC-6-like 2	3	701
nuclear receptor coactivator 6	4	1975		potassium channel subfamily K member 2	3	422
myosin-7B	4	1989		potassium channel subfamily K member 2	3	426
calcineurin-binding protein cabin-1	4	2196		uncharacterized protein KIAA2026	3	2103
uncharacterized protein KIAA1671	4	1806		mitogen-activated protein kinase kinase kinase 19	3	1215
serine/threonine-protein kinase WNK3	4	1743		vacuolar protein sorting-associated protein 13C	3	3628
sodium/hydrogen exchanger 6	4	649		RANBP2-like and GRIP domain-containing protein 1	3	1748
acrosomal protein KIAA1210	4	1533		sodium/bile acid cotransporter 7	3	340
uncharacterized protein C1orf105	4	210		phosphorylase b kinase regulatory subunit beta	3	1086
arf-GAP with SH3 domain, ANK repeat and PH domain-containing protein 2	4	1020		nucleolysin TIAR	3	392
arf-GAP with SH3 domain, ANK repeat and PH domain-containing protein 2	4	1017		polypeptide N-acetylgalactosaminyltransferase-like 6	3	601
arf-GAP with SH3 domain, ANK repeat and PH domain-containing protein 2	4	978		sorbin and SH3 domain-containing protein 1	3	1151
arf-GAP with SH3 domain, ANK repeat and PH domain-containing protein 2	4	975		sorbin and SH3 domain-containing protein 1	3	905
arf-GAP with SH3 domain, ANK repeat and PH domain-containing protein 2	4	891		sorbin and SH3 domain-containing protein 1	3	740
low-density lipoprotein receptor-related protein 2	4	4612		maestro heat-like repeat-containing protein family member 7	3	1323
low-density lipoprotein receptor-related protein 2	4	3892		zinc finger protein ZXDC	3	710
nebulin	4	8277		pyruvate carboxylase, mitochondrial	3	1178
nebulin	4	7796		histone-lysine N-methyltransferase NSD2	3	1365
anaphase-promoting complex subunit 1	4	1948		ribosomal oxygenase 2	3	465
protein TANC1	4	1755		transmembrane protein 8B	3	924
protein TANC1	4	1554		tumor necrosis factor receptor superfamily member 1A	3	455
histone-lysine N-methyltransferase MECOM	4	1124		dual specificity protein phosphatase CDC14B	3	461
palmitoyltransferase ZDHHC23	4	435		RANBP2-like and GRIP domain-containing protein 2	3	1756
palmitoyltransferase ZDHHC23	4	412		protein diaphanous homolog 1	3	1263
target of Nesh-SH3	4	1773		cancer/testis antigen 47A	3	288
target of Nesh-SH3	4	1771		cancer/testis antigen 47A	3	288
target of Nesh-SH3	4	1768		cancer/testis antigen 47A	3	288
target of Nesh-SH3	4	1766		cancer/testis antigen 47A	3	288
target of Nesh-SH3	4	1765		cancer/testis antigen 47A	3	288
target of Nesh-SH3	4	1765		cancer/testis antigen 47A	3	288
target of Nesh-SH3	4	1762		cancer/testis antigen 47A	3	288
target of Nesh-SH3	4	1748		cancer/testis antigen 47A	3	288
target of Nesh-SH3	4	1747		cancer/testis antigen 47A	3	288
target of Nesh-SH3	4	1745		cancer/testis antigen 47A	3	288
target of Nesh-SH3	4	1726		protein Daple	3	2028
target of Nesh-SH3	4	1719		teneurin-2	3	2535
target of Nesh-SH3	4	1716		calmodulin-regulated spectrin-associated protein 3	3	1276
target of Nesh-SH3	4	1672		integrator complex subunit 1	3	2190
serine/threonine-protein kinase ATR	4	2646		trinucleotide repeat-containing gene 18 protein	3	2968
serine/threonine-protein kinase ATR	4	2582		protein unc-13 homolog C	3	2214
histone-lysine N-methyltransferase NSD2	4	1365		elastin	3	677
protein furry homolog-like	4	3119		elastin	3	692
protein furry homolog-like	4	3114		elastin	3	711
protein furry homolog-like	4	3099		elastin	3	705
anaphase-promoting complex subunit 4	4	697		B-cell scaffold protein with ankyrin repeats	3	755
PDZ domain-containing protein 2	4	2873		ectonucleoside triphosphate diphosphohydrolase 1	3	517
PDZ domain-containing protein 2	4	2873		histone deacetylase 7	3	954
PDZ domain-containing protein 2	4	2861		RAS guanyl-releasing protein 2	3	609
PDZ domain-containing protein 2	4	2839		RAS guanyl-releasing protein 2	3	609
PDZ domain-containing protein 2	4	2781		exportin-7	3	1096
ciliogenesis and planar polarity effector 1	4	3251		sentrin-specific protease 6	3	1105
ciliogenesis and planar polarity effector 1	4	3251		gamma-tubulin complex component 5	3	1024
ciliogenesis and planar polarity effector 1	4	3233		receptor-type tyrosine-protein phosphatase mu	3	1465
ciliogenesis and planar polarity effector 1	4	3215		zinc finger FYVE domain-containing protein 16	3	1539
ciliogenesis and planar polarity effector 1	4	3199		myb-binding protein 1A	3	1332
ciliogenesis and planar polarity effector 1	4	3145		filamin-A	3	2647
ciliogenesis and planar polarity effector 1	4	3023		neuron navigator 2	3	1493
fibrocystin	4	3837		tartrate-resistant acid phosphatase type 5	3	325
fibrocystin	4	3278		tartrate-resistant acid phosphatase type 5	3	325
dystonin	4	5684		tartrate-resistant acid phosphatase type 5	3	325
ATP-binding cassette sub-family A member 13	4	3781		centrosomal protein of 170 kDa protein B	3	1554
ATP-binding cassette sub-family A member 13	4	3717		protein TASOR	3	1512
ATP-binding cassette sub-family A member 13	4	3424		homeodomain-interacting protein kinase 2	3	1171
ATP-binding cassette sub-family A member 13	4	3341		teneurin-2	3	2765
ATP-binding cassette sub-family A member 13	4	3341		protein SET	3	290
homeodomain-interacting protein kinase 2	4	1206		N-acyl-phosphatidylethanolamine-hydrolyzing phospholipase D	3	393
neurabin-1	4	1395		BCL-6 corepressor	3	1721
neurabin-1	4	1395		BCL-6 corepressor	3	1703
neurabin-1	4	1395		BCL-6 corepressor	3	1755
neurabin-1	4	1395		DNA polymerase subunit gamma-1	3	1239
neurabin-1	4	1352		centrosomal protein of 55 kDa	3	464
syndetin	4	775		bifunctional UDP-N-acetylglucosamine 2-epimerase/N-acetylmannosamine kinase	3	753
zinc fingers and homeoboxes protein 2	4	837		puratrophin-1	3	1191
gasdermin-C	4	489		puratrophin-1	3	1191
gasdermin-C	4	470		puratrophin-1	3	1191
gasdermin-C	4	442		leucine-rich repeat-containing protein 69	3	347
maestro heat-like repeat-containing protein family member 6	4	680		Golgi-associated kinase 1A	3	575
maestro heat-like repeat-containing protein family member 6	4	675		latent-transforming growth factor beta-binding protein 3	3	1303
fibrocystin-L	4	4243		dysferlin	3	2081
RB1-inducible coiled-coil protein 1	4	1594		apoptosis-inducing factor 1, mitochondrial	3	274
RB1-inducible coiled-coil protein 1	4	1587		dysferlin	3	2066
RB1-inducible coiled-coil protein 1	4	1584		dysferlin	3	2087
RB1-inducible coiled-coil protein 1	4	1542		dysferlin	3	2101
RB1-inducible coiled-coil protein 1	4	1479		dysferlin	3	2111
protein unc-13 homolog B	4	1989		dysferlin	3	2097
protein unc-13 homolog B	4	1971		dysferlin	3	2118
protein prune homolog 2	4	3089		dysferlin	3	2112
protein prune homolog 2	4	3085		dysferlin	3	2102
protein prune homolog 2	4	3079		dysferlin	3	2088
protein prune homolog 2	4	3072		dysferlin	3	2098
phospholipid-transporting ATPase ABCA1	4	2288		dysferlin	3	2067
phospholipid-transporting ATPase ABCA1	4	2288		dysferlin	3	2119
phospholipid-transporting ATPase ABCA1	4	2286		glutamate receptor ionotropic, NMDA 2A	3	1464
phospholipid-transporting ATPase ABCA1	4	1565		glutamate receptor ionotropic, NMDA 2A	3	1281
hemicentin-2	4	5038		genetic suppressor element 1	3	1113
hemicentin-2	4	5035		fibronectin type III domain-containing protein 3B	3	1204
hemicentin-2	4	5020		arf-GAP with Rho-GAP domain, ANK repeat and PH domain-containing protein 1	3	1133
hemicentin-2	4	4790		clathrin heavy chain linker domain-containing protein 1	3	464
protein TASOR 2	4	2716		von Willebrand factor D and EGF domain-containing protein	3	1590
protein TASOR 2	4	2716		polyunsaturated fatty acid lipoxygenase ALOX15	3	662
protein TASOR 2	4	2691		ankyrin-1	3	1897
protein TASOR 2	4	2665		protein phosphatase 1 regulatory subunit 12A	3	1030
protein TASOR 2	4	2635		protein phosphatase 1 regulatory subunit 12A	3	943
protein TASOR 2	4	2615		calpain-8	3	703
protein TASOR 2	4	2567		CTP synthase 2	3	586
protein TASOR 2	4	2567		dystonin	3	5675
protein TASOR 2	4	2430		protein shisa-7	3	538
immunoglobulin superfamily member 22	4	1346		transmembrane channel-like protein 4	3	712
neuron navigator 2	4	2485		protein FAM186A	3	2351
neuron navigator 2	4	2466		CD109 antigen	3	1428
neuron navigator 2	4	2452		CD109 antigen	3	1368
neuron navigator 2	4	2451		nitric oxide synthase, endothelial	3	596
neuron navigator 2	4	2445		teneurin-1	3	2732
neuron navigator 2	4	2430		teneurin-1	3	2731
neuron navigator 2	4	2418		maestro heat-like repeat-containing protein family member 9	3	861
neuron navigator 2	4	2395		versican core protein	3	2409
neuron navigator 2	4	1464		ectonucleoside triphosphate diphosphohydrolase 1	3	522
neuron navigator 2	4	1394		ectonucleoside triphosphate diphosphohydrolase 1	3	402
pregnancy zone protein	4	1045		ectonucleoside triphosphate diphosphohydrolase 1	3	372
pregnancy zone protein	4	831		ectonucleoside triphosphate diphosphohydrolase 1	3	372
IQ motif and SEC7 domain-containing protein 3	4	1063		ankyrin repeat domain-containing protein 31	3	1873
aggrecan core protein	4	2530		mucin-12	3	5335
aggrecan core protein	4	2492		immunoglobulin-like and fibronectin type III domain-containing protein 1	3	3708
protein dispatched homolog 2	4	1401		1-phosphatidylinositol 4,5-bisphosphate phosphodiesterase epsilon-1	3	1994
E3 SUMO-protein ligase PIAS1	4	660		DNA excision repair protein ERCC-1	3	273
E3 SUMO-protein ligase PIAS1	4	645		extracellular matrix protein FRAS1	3	1976
inositol hexakisphosphate and diphosphoinositol-pentakisphosphate kinase 1	4	1479		carnosine synthase 1	3	950
inositol hexakisphosphate and diphosphoinositol-pentakisphosphate kinase 1	4	1479		valine--tRNA ligase, mitochondrial	3	1093
inositol hexakisphosphate and diphosphoinositol-pentakisphosphate kinase 1	4	1479		protocadherin-11 X-linked	3	1065
[truncated: 49,144 more rows]

## Sheet: The most important data
タンパク質名のみ	CommmonSCSs数のみ	アミノ酸数	CommonSCSs/1AA	タンパク質名（重複なし）	isoform数	平均CommonSCSs数	平均アミノ酸数	CommonSCSs/1AA
titin	29	34350	0.00084425	titin	19	26	31910.2	0.000839468
titin	29	35991	0.000805757	mucin-16	14	18.7857	12872.3	0.00143366
titin	29	33423	0.000867666	adhesion G-protein coupled receptor V1	13	9	5525.15	0.00164202
titin	29	35622	0.000814104	ryanodine receptor 3	15	9	4792.47	0.00188425
titin	29	34088	0.000850739	nesprin-1	36	8.05556	8751.72	0.000920755
titin	29	34087	0.000850764	transmembrane protein KIAA1109	21	7.7	4833.05	0.00159529
titin	28	33101	0.000845896	protein unc-80 homolog	20	7.52381	3053.76	0.00247878
titin	28	34138	0.0008202	unconventional myosin-XVI	16	7	1865.33	0.0037528
titin	28	34137	0.000820224	cytoplasmic dynein 1 heavy chain 1	3	7	4646	0.00150667
titin	28	67057	0.000417555	mucin-19	1	7	8384	0.000834924
titin	28	33062	0.000846894	histone-lysine N-methyltransferase 2C	4	6.92857	4865.82	0.00142666
titin	28	33035	0.000847586	inositol 1,4,5-trisphosphate receptor type 2	28	6.5	2463.5	0.00266073
titin	25	26926	0.000928471	ryanodine receptor 1	1	6	5027.8	0.00119337
titin	25	27051	0.00092418	basement membrane-specific heparan sulfate proteoglycan core protein	5	6	4448.33	0.00134907
titin	25	27118	0.000921897	huntingtin	10	6	3144	0.0019084
titin	25	26973	0.000926853	probable ubiquitin carboxyl-terminal hydrolase FAF-Y	12	6	2557.5	0.00234604
titin	25	26956	0.000927437	helicase SRCAP	4	6	3230	0.00185759
titin	23	23574	0.000975651	E3 ubiquitin-protein ligase HUWE1	6	5.95	4455.3	0.00133537
mucin-16	21	14507	0.00144758	ryanodine receptor 2	6	5.9	4966.4	0.00118776
mucin-16	21	14257	0.00147296	nesprin-2	1	5.84211	6754.63	0.000862987
mucin-16	21	14235	0.00147524	unconventional myosin-XVIIIa	2	5.83333	1964.17	0.00297736
mucin-16	21	14228	0.00147596	retroelement silencing factor 1	1	5.8	1732.8	0.00334423																										相関係数	0.593699
mucin-16	21	14217	0.0014771	thyroid adenoma-associated protein	5	5.75	1615.5	0.00362521
mucin-16	21	14102	0.00148915	NLR family CARD domain-containing protein 3	19	5.69231	1057.77	0.00536815
mucin-16	21	14102	0.00148915	KAT8 regulatory NSL complex subunit 1	5	5.5	1033	0.00525963
mucin-16	21	14101	0.00148926	E3 ubiquitin-protein ligase UBR4	20	5.5	5242.54	0.00104887
mucin-16	21	14101	0.00148926	protocadherin Fat 4	2	5.25	4546.5	0.00113473
mucin-16	21	14101	0.00148926	apolipoprotein B-100	13	5	4563	0.00109577
mucin-16	21	14101	0.00148926	amiloride-sensitive sodium channel subunit alpha	24	5	696.333	0.00718914
mucin-16	15	11186	0.00134096	homeodomain-interacting protein kinase 3	3	5	1204.5	0.00415142
mucin-16	15	11159	0.00134421	obscurin	1	5	8109	0.000625843
adhesion G-protein coupled receptor V1	10	6306	0.00158579	teneurin-4	3	5	2562.25	0.0020023
adhesion G-protein coupled receptor V1	10	6313	0.00158403	coiled-coil domain-containing protein 168	5	5	7061	0.000708121
adhesion G-protein coupled receptor V1	10	6312	0.00158428	rho GTPase-activating protein 7	4	5	1207.56	0.00427887
adhesion G-protein coupled receptor V1	10	6312	0.00158428	transformation/transcription domain-associated protein	6	5	3854	0.00129738
adhesion G-protein coupled receptor V1	10	6286	0.00159084	neural cell adhesion molecule L1-like protein	33	5	1206.89	0.00414409
adhesion G-protein coupled receptor V1	10	6281	0.0015921	otogelin	4	5	2919	0.00171292
adhesion G-protein coupled receptor V1	10	6253	0.00159923	protein mono-ADP-ribosyltransferase PARP10	4	5	1026	0.00487364
adhesion G-protein coupled receptor V1	9	6171	0.00145843	envoplakin	6	5	2044	0.00244625
ryanodine receptor 3	9	4870	0.00184805	protein NPAT	2	5	1406.6	0.00355649
ryanodine receptor 3	9	4865	0.00184995	zinc finger protein 469	9	5	3953	0.00126486
ryanodine receptor 3	9	4859	0.00185223	histone-lysine N-methyltransferase 2D	21	5	5544.78	0.000901752
adhesion G-protein coupled receptor V1	9	5002	0.00179928	reelin	11	5	3459	0.0014455
adhesion G-protein coupled receptor V1	9	4963	0.00181342	mucin-3A	7	5	3323	0.00150466
nesprin-1	9	8837	0.00101845	structural maintenance of chromosomes flexible hinge domain-containing protein 1	3	5	1988.75	0.00251718
nesprin-1	9	8820	0.00102041	dyslexia-associated protein KIAA0319	18	4.90476	1014.29	0.00483783
ryanodine receptor 3	9	4866	0.00184957	multiple PDZ domain protein	21	4.88462	1971.27	0.00249611
ryanodine receptor 3	9	4865	0.00184995	DNA polymerase zeta catalytic subunit	26	4.85714	2984.43	0.00163217
ryanodine receptor 3	9	4865	0.00184995	pecanex-like protein 1	2	4.84615	2042.77	0.00245985
ryanodine receptor 3	9	4865	0.00184995	baculoviral IAP repeat-containing protein 6	11	4.83333	4749.28	0.00101733
ryanodine receptor 3	9	4864	0.00185033	protein PRRC2C	19	4.83333	2829.22	0.00170689
ryanodine receptor 3	9	4860	0.00185185	telomere-associated protein RIF1	14	4.81818	2363.82	0.00203786
ryanodine receptor 3	9	4859	0.00185223	sodium bicarbonate cotransporter 3	5	4.80952	1134.67	0.00423393
ryanodine receptor 3	9	4837	0.00186066	nck-associated protein 5-like	13	4.8	1325	0.00361914
ryanodine receptor 3	9	4830	0.00186335	golgin subfamily A member 3	3	4.76923	1392.31	0.00343532
ryanodine receptor 3	9	3855	0.00233463	histone-lysine N-methyltransferase 2A	2	4.71429	3750.14	0.0012579
ryanodine receptor 3	9	4864	0.00185033	protein TANC1	5	4.6875	1790.25	0.00260738
ryanodine receptor 3	9	4863	0.00185071	FH1/FH2 domain-containing protein 3	32	4.68421	1533	0.00304999
protein unc-80 homolog	8	3324	0.00240674	fibrous sheath-interacting protein 2	7	4.5	5186.5	0.000867118
transmembrane protein KIAA1109	8	5093	0.00157078	TP53-binding protein 1	2	4.5	1761.33	0.00251645
transmembrane protein KIAA1109	8	5005	0.0015984	protein MON2 homolog	18	4.45455	1633.27	0.00271965
protein unc-80 homolog	8	3258	0.00245549	dynein heavy chain 17, axonemal	77	4.4	3820	0.00116968
nesprin-1	8	8749	0.00091439	E3 ubiquitin-protein ligase MYCBP2	9	4.4	4673.67	0.000943415
protein unc-80 homolog	8	3234	0.00247372	fibrocystin	3	4.28571	3499.1	0.0012016
nesprin-1	8	8797	0.000909401	ATP-binding cassette sub-family A member 13	2	4.27273	4302.91	0.00100077
protein unc-80 homolog	8	3323	0.00240746	WASH complex subunit 4	13	4.16667	1043.33	0.00406572
transmembrane protein KIAA1109	8	5026	0.00159172	nuclear pore complex protein Nup98-Nup96	1	4.14286	1786	0.00231907
transmembrane protein KIAA1109	8	5005	0.0015984	WD repeat- and FYVE domain-containing protein 4	4	4.08333	2464.25	0.00170125
transmembrane protein KIAA1109	8	5004	0.00159872	arf-GAP with Rho-GAP domain, ANK repeat and PH domain-containing protein 1	18	4	1245.5	0.00319142
nesprin-1	8	8846	0.000904364	protein piccolo	4	4	3869	0.00105351
nesprin-1	8	8842	0.000904773	extracellular matrix protein FRAS1	5	4	2994	0.00138224
nesprin-1	8	8839	0.00090508	N(4)-(beta-N-acetylglucosaminyl)-L-asparaginase	12	4	341	0.0117327
nesprin-1	8	8832	0.000905797	glutamate receptor 2	2	4	854.8	0.00468282
nesprin-1	8	8829	0.000906105	glutamate receptor 3	13	4	894	0.00447427
nesprin-1	8	8827	0.00090631	serine/threonine-protein kinase WNK3	21	4	1781	0.00224637
nesprin-1	8	8823	0.000906721	fibroblast growth factor receptor-like 1	22	4	507.833	0.00787878
nesprin-1	8	8822	0.000906824	protocadherin Fat 3	5	4	4248.1	0.000955295
nesprin-1	8	8809	0.000908162	DNA excision repair protein ERCC-6-like	2	4	1188.5	0.00337462
nesprin-1	8	8804	0.000908678	Fanconi anemia group D2 protein	2	4	1449	0.002761
nesprin-1	8	8799	0.000909194	neuron navigator 3	23	4	2156.78	0.00188305
nesprin-1	8	8795	0.000909608	AT-hook DNA-binding motif-containing protein 1	30	4	1603	0.00249532
nesprin-1	8	8794	0.000909711	helicase with zinc finger domain 2	16	4	2520	0.00160579
nesprin-1	8	8793	0.000909815	solute carrier family 2, facilitated glucose transporter member 4	6	4	509	0.00785855
nesprin-1	8	8758	0.000913451	solute carrier family 26 member 6	2	4	728.167	0.00550825
nesprin-1	8	8744	0.000914913	nuclear receptor corepressor 2	21	4	2492	0.00160529
nesprin-1	8	8721	0.000917326	coatomer subunit alpha	8	4	1228.5	0.00325605
protein unc-80 homolog	8	3338	0.00239664	laminin subunit alpha-4	5	4	1819.5	0.00219841
protein unc-80 homolog	8	3337	0.00239736	protein eyes shut homolog	11	4	3154.5	0.00126804
protein unc-80 homolog	8	3336	0.00239808	SLIT and NTRK-like protein 2	2	4	845	0.00473373
protein unc-80 homolog	8	3326	0.00240529	uncharacterized protein KIAA1671	14	4	1806	0.00221484
protein unc-80 homolog	8	3319	0.00241036	histone-lysine N-methyltransferase SETDB1	7	4	1291.25	0.00309777
transmembrane protein KIAA1109	8	5093	0.00157078	protein strawberry notch homolog 1	9	4	1392.5	0.00287253
transmembrane protein KIAA1109	8	5093	0.00157078	BIVM-ERCC5 protein	6	4	1640	0.00243902
transmembrane protein KIAA1109	8	5092	0.00157109	disheveled-associated activator of morphogenesis 1	7	4	1075.5	0.00371926
transmembrane protein KIAA1109	8	5076	0.00157604	slit homolog 3 protein	20	4	1504.33	0.00266017
transmembrane protein KIAA1109	8	5072	0.00157729	dynein heavy chain 11, axonemal	21	4	4516	0.00088574
transmembrane protein KIAA1109	8	5058	0.00158165	SKI family transcriptional corepressor 2	10	4	1015	0.00394089
transmembrane protein KIAA1109	8	5050	0.00158416	anillin	2	4	1110.62	0.00360302
transmembrane protein KIAA1109	8	5043	0.00158636	general transcription factor 3C polypeptide 1	5	4	2079.67	0.00192368
transmembrane protein KIAA1109	8	4510	0.00177384	protein FAM214A	18	4	1058.79	0.00378186
nesprin-1	8	8845	0.000904466	filamin-A-interacting protein 1	11	4	1156.33	0.00348241
nesprin-1	8	8841	0.000904875	dedicator of cytokinesis protein 10	4	4	2212.09	0.00180841
nesprin-1	8	8791	0.000910022	transcription factor-like 5 protein	1	4	465.7	0.00876252
nesprin-1	8	8271	0.000967235	A disintegrin and metalloproteinase with thrombospondin motifs 9	6	4	1921	0.00208236
nesprin-1	8	8102	0.000987411	neuronal PAS domain-containing protein 4	3	4	699	0.00598577
protein unc-80 homolog	8	3333	0.00240024	palmitoyltransferase ZDHHC23	5	4	420.833	0.00951235
protein unc-80 homolog	8	3296	0.00242718	thyroid receptor-interacting protein 11	18	4	1809.5	0.00223488
protein unc-80 homolog	8	3270	0.00244648	RNA polymerase-associated protein CTR9 homolog	2	4	1161	0.00344567
protein unc-80 homolog	8	3256	0.002457	baculoviral IAP repeat-containing protein 1	5	4	1349	0.00297509
protein unc-80 homolog	8	3255	0.00245776	protein AHNAK2	12	4	5728.33	0.00069833
protein unc-80 homolog	8	3251	0.00246078	ATP-binding cassette sub-family A member 10	6	4	1543	0.00259235
protein unc-80 homolog	8	3220	0.00248447	DNA damage-binding protein 1	30	4	1140	0.00350877
transmembrane protein KIAA1109	8	4991	0.00160289	laminin subunit beta-2	14	4	1798	0.00222469
transmembrane protein KIAA1109	8	4974	0.00160836	mucin-2	11	4	5289	0.000756287
transmembrane protein KIAA1109	8	4970	0.00160966	nuclear receptor-interacting protein 1	5	4	1158	0.00345423
nesprin-1	8	8846	0.000904364	ras GTPase-activating-like protein IQGAP1	43	4	1657	0.002414
nesprin-1	8	8846	0.000904364	myomesin-2	2	4	1455	0.00274927
nesprin-1	8	8839	0.00090508	low-density lipoprotein receptor-related protein 2	12	4	4386.33	0.000918114
nesprin-1	8	8808	0.000908265	symplekin	18	4	1274	0.00313972
nesprin-1	8	8794	0.000909711	protocadherin Fat 1	4	4	4594	0.000870702
nesprin-1	8	8757	0.000913555	nucleolin	4	4	710	0.0056338
nesprin-1	8	8735	0.000915856	talin-1	4	4	2541	0.00157418
nesprin-1	8	8720	0.000917431	splicing factor 3B subunit 1	5	4	1304	0.00306748
nesprin-1	8	8716	0.000917852	sodium-dependent proline transporter	40	4	620.167	0.00651197
nesprin-1	8	8271	0.000967235	little elongation complex subunit 1	8	4	2133.67	0.00187976
transmembrane protein KIAA1109	8	4477	0.00178691	RNA polymerase II-associated protein 1	2	4	1393	0.0028715
thyroid adenoma-associated protein	7	1953	0.00358423	homeobox protein SIX4	20	4	777	0.00514814
unconventional myosin-XVI	7	1880	0.0037234	PH-interacting protein	2	4	1564.4	0.00262785
thyroid adenoma-associated protein	7	1952	0.00358607	4'-phosphopantetheine phosphatase	46	4	773	0.00517464
thyroid adenoma-associated protein	7	1953	0.00358423	manganese-transporting ATPase 13A1	1	4	1204	0.00332226
cytoplasmic dynein 1 heavy chain 1	7	4646	0.00150667	caskin-1	4	4	1395.5	0.00286821
inositol 1,4,5-trisphosphate receptor type 2	7	2701	0.00259163	carbohydrate sulfotransferase 6	14	4	395	0.0101266
unconventional myosin-XVI	7	1858	0.00376749	transport and Golgi organization protein 6 homolog	3	4	1018	0.0039513
thyroid adenoma-associated protein	7	1953	0.00358423	multimerin-2	1	4	908.333	0.00440799
histone-lysine N-methyltransferase 2C	7	4911	0.00142537	dedicator of cytokinesis protein 5	1	4	1870	0.00213904
mucin-19	7	8384	0.000834924	hepatitis A virus cellular receptor 2	27	4	301	0.013289
histone-lysine N-methyltransferase 2C	7	4983	0.00140478	protein dispatched homolog 2	33	4	1401	0.0028551
histone-lysine N-methyltransferase 2C	7	4982	0.00140506	kinetochore scaffold 1	8	4	2288.67	0.00174888
histone-lysine N-methyltransferase 2C	7	4982	0.00140506	coiled-coil domain-containing protein 27	8	4	684.857	0.00585987
histone-lysine N-methyltransferase 2C	7	4979	0.0014059	kinesin-like protein KIF19	3	4	965.5	0.00414812
histone-lysine N-methyltransferase 2C	7	4928	0.00142045	very large A-kinase anchor protein	14	4	2824.5	0.00141995
thyroid adenoma-associated protein	7	1909	0.00366684	PDZ domain-containing protein 2	6	4	2752.33	0.00145639
thyroid adenoma-associated protein	7	1879	0.00372539	protein FAM83H	14	4	1179	0.00339271
thyroid adenoma-associated protein	7	1453	0.00481762	histone-lysine N-methyltransferase SETD5	6	3.9697	1373.18	0.00286754
histone-lysine N-methyltransferase 2C	7	4982	0.00140506	nebulin	11	3.95	8270.12	0.000478168
histone-lysine N-methyltransferase 2C	7	4959	0.00141157	pleckstrin homology domain-containing family A member 7	37	3.95	1266.95	0.00312769
histone-lysine N-methyltransferase 2C	7	4927	0.00142074	E3 ubiquitin-protein ligase HECTD1	18	3.91667	2457.42	0.00159564
histone-lysine N-methyltransferase 2C	7	4967	0.0014093	glutamate receptor 1	9	3.90909	869.636	0.00450232
histone-lysine N-methyltransferase 2C	7	4943	0.00141614	NHS-like protein 1	4	3.88889	1613.94	0.00241234
histone-lysine N-methyltransferase 2C	7	4932	0.0014193	maltase-glucoamylase, intestinal	10	3.88889	2409.44	0.00167672
histone-lysine N-methyltransferase 2C	7	4904	0.00142741	uromodulin-like 1	4	3.85714	1240.86	0.00319901
histone-lysine N-methyltransferase 2C	7	4678	0.00149637	doublecortin domain-containing protein 1	6	3.85714	1604	0.00247077
histone-lysine N-methyltransferase 2C	7	4963	0.00141044	nuclear receptor corepressor 1	20	3.84783	2452.96	0.00156215
unconventional myosin-XVI	7	1858	0.00376749	ciliogenesis and planar polarity effector 1	15	3.82609	3068.52	0.00123822
thyroid adenoma-associated protein	7	1284	0.00545171	ubiquitin carboxyl-terminal hydrolase 32	2	3.81818	1549.55	0.00245888
protein unc-80 homolog	7	2499	0.00280112	otoancorin	4	3.8	881.8	0.00444621
adhesion G-protein coupled receptor V1	7	4019	0.00174173	serine/threonine-protein kinase SMG1	12	3.8	3534.1	0.00107222
adhesion G-protein coupled receptor V1	7	4012	0.00174477	BRD4-interacting chromatin-remodeling complex-associated protein	4	3.8	1467	0.00258702
histone-lysine N-methyltransferase 2C	7	4983	0.00140478	dmX-like protein 1	20	3.77778	3005.22	0.00125741
histone-lysine N-methyltransferase 2C	7	4982	0.00140506	laminin subunit alpha-2	36	3.75	2947.38	0.00130136
histone-lysine N-methyltransferase 2C	7	4978	0.00140619	protocadherin-11 X-linked	2	3.75	1274.75	0.0029372
histone-lysine N-methyltransferase 2C	7	4978	0.00140619	pleckstrin homology domain-containing family G member 2	3	3.75	1255.62	0.00302486
histone-lysine N-methyltransferase 2C	7	4972	0.00140788	dynein heavy chain 12, axonemal	3	3.75	3625.62	0.00103519
histone-lysine N-methyltransferase 2C	7	4966	0.00140959	fibrocystin-L	8	3.75	3951.12	0.000949589
histone-lysine N-methyltransferase 2C	7	4954	0.001413	neuron navigator 2	7	3.73333	2166.9	0.00175429
histone-lysine N-methyltransferase 2C	7	4934	0.00141873	coiled-coil domain-containing protein 17	16	3.71429	563.357	0.00681459
histone-lysine N-methyltransferase 2C	7	4922	0.00142219	neurobeachin	9	3.71429	2683.07	0.0014527
inositol 1,4,5-trisphosphate receptor type 2	7	2721	0.00257258	neurofibromin	8	3.66667	2083.33	0.00174061
inositol 1,4,5-trisphosphate receptor type 2	7	2699	0.00259355	desmoplakin	14	3.66667	2523.67	0.00143252
histone-lysine N-methyltransferase 2C	7	4982	0.00140506	midasin	5	3.66667	4736.67	0.00080477
histone-lysine N-methyltransferase 2C	7	4958	0.00141186	coiled-coil domain-containing protein 97	12	3.66667	349.667	0.0105997
ryanodine receptor 1	6	5038	0.00119095	inositol hexakisphosphate and diphosphoinositol-pentakisphosphate kinase 1	10	3.65116	1354.44	0.00266073
ryanodine receptor 2	6	4967	0.00120797	nuclear receptor coactivator 6	14	3.65	1860.65	0.00196384
ryanodine receptor 1	6	5033	0.00119213	glutamate receptor ionotropic, kainate 2	41	3.625	861	0.0041419
KAT8 regulatory NSL complex subunit 1	6	1104	0.00543478	centrosomal protein of 162 kDa	2	3.625	1236.12	0.00291769
KAT8 regulatory NSL complex subunit 1	6	1105	0.00542986	RB1-inducible coiled-coil protein 1	14	3.61111	1473.89	0.00241935
protocadherin Fat 4	6	4982	0.00120434	MAX gene-associated protein	5	3.6087	2640.17	0.00128553
protocadherin Fat 4	6	4983	0.00120409	zinc finger homeobox protein 3	34	3.6	3166.6	0.00107537
basement membrane-specific heparan sulfate proteoglycan core protein	6	4392	0.00136612	putative maltase-glucoamylase-like protein FLJ16351	23	3.6	1785.4	0.00202496
unconventional myosin-XVIIIa	6	2058	0.00291545	roquin-2	147	3.6	1134.2	0.00316715
unconventional myosin-XVIIIa	6	2051	0.0029254	homeodomain-interacting protein kinase 1	1	3.58333	1126.33	0.00311455
unconventional myosin-XVIIIa	6	2002	0.002997	signal-induced proliferation-associated 1-like protein 1	2	3.57576	1684.91	0.00208861
KAT8 regulatory NSL complex subunit 1	6	1105	0.00542986	1-phosphatidylinositol 4,5-bisphosphate phosphodiesterase epsilon-1	1	3.57143	2115.93	0.00168783
huntingtin	6	3144	0.0019084	dynein heavy chain 6, axonemal	12	3.57143	3748.64	0.00092263
probable ubiquitin carboxyl-terminal hydrolase FAF-Y	6	2555	0.00234834	protein phosphatase 1 regulatory subunit 12B	1	3.5625	650.5	0.00758049
basement membrane-specific heparan sulfate proteoglycan core protein	6	4391	0.00136643	histone-lysine N-methyltransferase, H3 lysine-36 specific	2	3.5625	2263.12	0.0015672
helicase SRCAP	6	3230	0.00185759	laminin subunit alpha-3	4	3.54545	2822	0.00126906
zinc finger homeobox protein 3	6	3703	0.00162031	unconventional myosin-XVIIIb	3	3.53333	2442.27	0.0014115
nesprin-2	6	6885	0.00087146	FRAS1-related extracellular matrix protein 2	14	3.5	2466.5	0.00135579
KAT8 regulatory NSL complex subunit 1	6	1105	0.00542986	protein sidekick-2	3	3.5	1900.5	0.00183109
retroelement silencing factor 1	6	1747	0.00343446	chromodomain-helicase-DNA-binding protein 8	4	3.5	2441.5	0.0014265
protocadherin Fat 4	6	4981	0.00120458	anaphase-promoting complex subunit 4	1	3.5	605.833	0.00601214
E3 ubiquitin-protein ligase HUWE1	6	4374	0.00137174	solute carrier family 22 member 5	3	3.5	467.5	0.00762176
unconventional myosin-XVIIIa	6	2054	0.00292113	matrilin-2	2	3.5	886.833	0.00395838
fibrous sheath-interacting protein 2	6	6907	0.000868684	bone morphogenetic protein 1	1	3.5	858	0.00408319
NLR family CARD domain-containing protein 3	6	1065	0.0056338	M-phase phosphoprotein 8	1	3.5	869.5	0.0040195
nesprin-2	6	6907	0.000868684	VPS10 domain-containing receptor SorCS1	6	3.46154	1111.77	0.00303942
unconventional myosin-XVIIIa	6	2039	0.00294262	acrosomal protein KIAA1210	6	3.4	1547.8	0.00217798
retroelement silencing factor 1	6	1747	0.00343446	protein unc-13 homolog B	5	3.4	1873.7	0.00199948
zinc finger homeobox protein 3	6	3702	0.00162075	hemicentin-2	10	3.33333	4220.56	0.000785482
E3 ubiquitin-protein ligase HUWE1	6	4374	0.00137174	A disintegrin and metalloproteinase with thrombospondin motifs 20	3	3.33333	1775.67	0.00183847
nesprin-2	6	6922	0.000866802	protocadherin-11 Y-linked	12	3.33333	1160.22	0.00284977
nesprin-2	6	6921	0.000866927	proline rich transmembrane protein 1B	2	3.33333	294.333	0.011284
nesprin-2	6	6908	0.000868558	sorbin and SH3 domain-containing protein 1	5	3.25974	1018.52	0.00325483
nesprin-2	6	6899	0.000869691	maestro heat-like repeat-containing protein family member 6	2	3.25	694	0.00470799
nesprin-2	6	6884	0.000871586	phosphatidylinositol phosphatase PTPRQ	7	3.25	2378.25	0.00135625
ryanodine receptor 2	6	4985	0.00120361	dystonin	5	3.21951	6801.29	0.000481853
ryanodine receptor 2	6	4984	0.00120385	chromodomain-helicase-DNA-binding protein 3	1	3.2	2007.1	0.00158118
ryanodine receptor 2	6	4977	0.00120555	glutamate receptor 4	1	3.14286	712.786	0.00415217
ryanodine receptor 2	6	4975	0.00120603	disks large homolog 5	11	3.14286	1713.5	0.00181856
ryanodine receptor 2	6	4973	0.00120652	protein FAM186B	2	3.14286	859.143	0.00366482
ryanodine receptor 2	6	4965	0.00120846	WASH complex subunit 2C	3	3.11111	1186.44	0.00261756
ryanodine receptor 2	6	4954	0.00121114	anaphase-promoting complex subunit 1	9	3.11111	1830.11	0.00171106
thyroid adenoma-associated protein	6	1832	0.00327511	calcium/calmodulin-dependent protein kinase kinase 1	2	3.07692	434.231	0.00791163
thyroid adenoma-associated protein	6	1831	0.0032769	elastin	3	3.03704	702.926	0.00433202
KAT8 regulatory NSL complex subunit 1	6	1105	0.00542986	protein enabled homolog	3	3.03704	845.185	0.00358238
ryanodine receptor 1	6	5032	0.00119237	usherin	1	3	3374	0.000804
ryanodine receptor 1	6	5027	0.00119355	interleukin-7	3	3	145.571	0.0213505
protein unc-80 homolog	6	2691	0.00222965	WASH complex subunit 2A	11	3	1133	0.00263371
retroelement silencing factor 1	6	1747	0.00343446	mitogen-activated protein kinase kinase kinase 6	1	3	1059.5	0.00278166
KAT8 regulatory NSL complex subunit 1	6	1104	0.00543478	laminin subunit gamma-2	9	3	1015.33	0.00276699
KAT8 regulatory NSL complex subunit 1	6	1042	0.00575816	genetic suppressor element 1	3	3	1340.92	0.00226382
KAT8 regulatory NSL complex subunit 1	6	1041	0.00576369	receptor tyrosine-protein kinase erbB-4	3	3	1297.91	0.00229856
ryanodine receptor 1	6	5009	0.00119784	dynein heavy chain 2, axonemal	3	3	3945.23	0.000778508
E3 ubiquitin-protein ligase HUWE1	6	4457	0.0013462	ankyrin-1	5	3	1884.69	0.00159424
E3 ubiquitin-protein ligase HUWE1	6	4457	0.0013462	copper-transporting ATPase 1	7	3	1461	0.00205485
nesprin-2	6	6936	0.000865052	breast cancer type 2 susceptibility protein	12	3	3418	0.000877706
nesprin-2	6	6936	0.000865052	collagen alpha-1(VII) chain	2	3	2644.17	0.00114158
nesprin-2	6	6936	0.000865052	fibrillin-1	8	3	2871	0.00104493
nesprin-2	6	6936	0.000865052	gap junction alpha-1 protein	10	3	382	0.0078534
nesprin-2	6	6935	0.000865177	glycine dehydrogenase (decarboxylating), mitochondrial	12	3	1020	0.00294118
nesprin-2	6	6922	0.000866802	keratin, type I cytoskeletal 18	1	3	430	0.00697674
nesprin-2	6	6921	0.000866927	peroxisome assembly protein 12	13	3	359	0.00835655
nesprin-2	6	6913	0.00086793	phosphorylase b kinase regulatory subunit beta	16	3	1090.67	0.00275064
nesprin-2	6	6897	0.000869943	eosinophil peroxidase	7	3	715	0.0041958
E3 ubiquitin-protein ligase UBR4	6	5272	0.00113809	retinal dehydrogenase 1	11	3	501	0.00598802
E3 ubiquitin-protein ligase UBR4	6	5271	0.0011383	pancreatic alpha-amylase	8	3	511	0.00587084
E3 ubiquitin-protein ligase UBR4	6	5271	0.0011383	glutamate receptor ionotropic, kainate 1	34	3	884.125	0.00341404
E3 ubiquitin-protein ligase UBR4	6	5271	0.0011383	glutamate receptor ionotropic, kainate 3	2	3	919	0.00326442
E3 ubiquitin-protein ligase UBR4	6	5267	0.00113917	glutamate receptor ionotropic, NMDA 2A	31	3	1378	0.00218671
E3 ubiquitin-protein ligase UBR4	6	5266	0.00113938	pyruvate carboxylase, mitochondrial	11	3	1178	0.00254669
E3 ubiquitin-protein ligase UBR4	6	5261	0.00114047	NADPH--cytochrome P450 reductase	3	3	675.429	0.00444553
E3 ubiquitin-protein ligase UBR4	6	5244	0.00114416	solute carrier family 35 member E4	4	3	350	0.00857143
E3 ubiquitin-protein ligase UBR4	6	5243	0.00114438	olfactory receptor 52N5	27	3	324	0.00925926
E3 ubiquitin-protein ligase UBR4	6	5232	0.00114679	structural maintenance of chromosomes protein 4	13	3	1215	0.00249437
basement membrane-specific heparan sulfate proteoglycan core protein	6	4574	0.00131176	HMG domain-containing protein 4	13	3	547	0.00554048
E3 ubiquitin-protein ligase UBR4	6	5256	0.00114155	erbin	5	3	1379.33	0.00218031
E3 ubiquitin-protein ligase UBR4	6	5233	0.00114657	PR domain zinc finger protein 2	29	3	1595.27	0.00188795
basement membrane-specific heparan sulfate proteoglycan core protein	6	4456	0.0013465	40S ribosomal protein S13	2	3	151	0.0198675
basement membrane-specific heparan sulfate proteoglycan core protein	6	4439	0.00135166	alpha-amylase 1	1	3	511	0.00587084
basement membrane-specific heparan sulfate proteoglycan core protein	6	4438	0.00135196	coiled-coil domain-containing protein 73	12	3	1079	0.00278035
ryanodine receptor 2	6	4978	0.0012053	tetratricopeptide repeat protein 7B	6	3	872.333	0.00344312
protein unc-80 homolog	6	2247	0.00267023	sodium/bile acid cotransporter 5	1	3	438	0.00684932
protein unc-80 homolog	6	2066	0.00290416	potassium channel subfamily K member 2	1	3	400.375	0.00752068
adhesion G-protein coupled receptor V1	6	3597	0.00166806	mitogen-activated protein kinase kinase kinase 19	1	3	1258	0.00239386
histone-lysine N-methyltransferase 2C	6	3873	0.00154919	RANBP2-like and GRIP domain-containing protein 1	2	3	1749.18	0.00171582
histone-lysine N-methyltransferase 2C	6	3741	0.00160385	nucleolysin TIAR	1	3	325	0.00951405
retroelement silencing factor 1	6	1747	0.00343446	zinc finger protein ZXDC	3	3	775.2	0.00388668
nesprin-2	6	6936	0.000865052	histone-lysine N-methyltransferase NSD2	10	3	1096	0.00310741
nesprin-2	6	6913	0.00086793	tumor necrosis factor receptor superfamily member 1A	1	3	368	0.0083909
NLR family CARD domain-containing protein 3	6	1074	0.00558659	RANBP2-like and GRIP domain-containing protein 2	4	3	1806.71	0.00166187
NLR family CARD domain-containing protein 3	6	1074	0.00558659	protein diaphanous homolog 1	1	3	1284.86	0.00233556
NLR family CARD domain-containing protein 3	6	1074	0.00558659	cancer/testis antigen 47A	1	3	295.2	0.0101691
NLR family CARD domain-containing protein 3	6	1074	0.00558659	protein Daple	8	3	1691.67	0.00194297
NLR family CARD domain-containing protein 3	6	1074	0.00558659	teneurin-2	1	3	2656.56	0.00113112
NLR family CARD domain-containing protein 3	6	1074	0.00558659	calmodulin-regulated spectrin-associated protein 3	7	3	1246	0.00240952
NLR family CARD domain-containing protein 3	6	1074	0.00558659	integrator complex subunit 1	12	3	2220.5	0.00135123
NLR family CARD domain-containing protein 3	6	1074	0.00558659	exportin-7	5	3	1082.67	0.00277134
NLR family CARD domain-containing protein 3	6	1074	0.00558659	sentrin-specific protease 6	7	3	1055.36	0.00284787
KAT8 regulatory NSL complex subunit 1	6	1041	0.00576369	gamma-tubulin complex component 5	18	3	999.867	0.00302289
E3 ubiquitin-protein ligase HUWE1	6	4501	0.00133304	filamin-A	3	3	2643	0.00113508
E3 ubiquitin-protein ligase HUWE1	6	4500	0.00133333	tartrate-resistant acid phosphatase type 5	11	3	325	0.00923077
E3 ubiquitin-protein ligase HUWE1	6	4494	0.00133511	centrosomal protein of 170 kDa protein B	2	3	1518.12	0.00202275
E3 ubiquitin-protein ligase HUWE1	6	4486	0.00133749	homeodomain-interacting protein kinase 2	7	3	1267.67	0.00237738
E3 ubiquitin-protein ligase HUWE1	6	4485	0.00133779	protein SET	4	3	290.444	0.0103615
E3 ubiquitin-protein ligase HUWE1	6	4484	0.00133809	BCL-6 corepressor	12	3	1732.14	0.00173243
E3 ubiquitin-protein ligase HUWE1	6	4468	0.00134288	DNA polymerase subunit gamma-1	11	3	1239	0.00242131
E3 ubiquitin-protein ligase HUWE1	6	4464	0.00134409	leucine-rich repeat-containing protein 69	1	3	269	0.0121762
E3 ubiquitin-protein ligase HUWE1	6	4464	0.00134409	Golgi-associated kinase 1A	7	3	575	0.00521739
E3 ubiquitin-protein ligase HUWE1	6	4464	0.00134409	dysferlin	1	3	2099.5	0.00142904
E3 ubiquitin-protein ligase HUWE1	6	4464	0.00134409	apoptosis-inducing factor 1, mitochondrial	3	3	498.667	0.00692299
E3 ubiquitin-protein ligase HUWE1	6	4464	0.00134409	polyunsaturated fatty acid lipoxygenase ALOX15	2	3	662	0.00453172
E3 ubiquitin-protein ligase HUWE1	6	4464	0.00134409	protein phosphatase 1 regulatory subunit 12A	1	3	994.4	0.00302035
E3 ubiquitin-protein ligase HUWE1	6	4418	0.00135808	calpain-8	9	3	509.8	0.00613809
probable ubiquitin carboxyl-terminal hydrolase FAF-Y	6	2560	0.00234375	CTP synthase 2	8	3	591.25	0.00507666
E3 ubiquitin-protein ligase HUWE1	6	4457	0.0013462	protein shisa-7	10	3	538	0.00557621
neurofibromin	5	2818	0.00177431	protein FAM186A	13	3	2313.5	0.00129766
apolipoprotein B-100	5	4563	0.00109577	CD109 antigen	6	3	1413.67	0.00212332
amiloride-sensitive sodium channel subunit alpha	5	669	0.00747384	maestro heat-like repeat-containing protein family member 9	11	3	745.667	0.00415197
nck-associated protein 5-like	5	1334	0.00374813	mucin-12	7	3	5335	0.000562324
arf-GAP with Rho-GAP domain, ANK repeat and PH domain-containing protein 1	5	1450	0.00344828	DNA excision repair protein ERCC-1	9	3	296.067	0.0101662
neurofibromin	5	2839	0.00176118	carnosine synthase 1	8	3	919.75	0.00327405
homeodomain-interacting protein kinase 3	5	1194	0.0041876	cancer-associated gene 1 protein	2	3	768	0.00396555
histone-lysine N-methyltransferase SETD5	5	1442	0.00346741	zinc finger protein 573	5	3	617.8	0.00487542
obscurin	5	7968	0.00062751	claspin	11	3	1316.17	0.00228024
teneurin-4	5	2769	0.00180571	mitochondrial glutamate carrier 1	6	3	323	0.00928793
TP53-binding protein 1	5	1975	0.00253165	schlafen family member 12-like	3	3	589.375	0.0050922
TP53-binding protein 1	5	1977	0.00252908	disheveled-associated activator of morphogenesis 2	3	3	1098.44	0.00273463
coiled-coil domain-containing protein 168	5	7081	0.000706115	inactive serine/threonine-protein kinase TEX14	23	3	1414	0.00215432
amiloride-sensitive sodium channel subunit alpha	5	692	0.00722543	coronin-7	7	3	844.25	0.0035944
amiloride-sensitive sodium channel subunit alpha	5	728	0.00686813	CORO7-PAM16 protein	7	3	1048	0.0028626
rho GTPase-activating protein 7	5	1017	0.00491642	pikachurin	25	3	933.667	0.00326469
dyslexia-associated protein KIAA0319	5	1063	0.00470367	abnormal spindle-like microcephaly-associated protein	3	3	2684.5	0.00122422
dyslexia-associated protein KIAA0319	5	1072	0.00466418	huntingtin-interacting protein 1	16	3	1015.67	0.00295471
dyslexia-associated protein KIAA0319	5	1027	0.00486855	serine/threonine-protein kinase 36	5	3	1169.12	0.00269109
dyslexia-associated protein KIAA0319	5	1011	0.0049456	kinesin-like protein KIF1A	4	3	1727.96	0.00173706
telomere-associated protein RIF1	5	2446	0.00204415	non-receptor tyrosine-protein kinase TNK1	13	3	613.833	0.00495425
telomere-associated protein RIF1	5	2446	0.00204415	glutaminase kidney	7	3	567.2	0.00560046
telomere-associated protein RIF1	5	2446	0.00204415	golgin subfamily B member 1	4	3	3227.25	0.000929876
histone-lysine N-methyltransferase 2A	5	3972	0.00125881	syndetin	20	3	788.8	0.00394397
transformation/transcription domain-associated protein	5	3859	0.00129567	transient receptor potential cation channel subfamily V member 3	12	3	790.5	0.00379507
neural cell adhesion molecule L1-like protein	5	1208	0.00413907	inactive tyrosine-protein kinase 7	15	3	1016.86	0.00295773
neural cell adhesion molecule L1-like protein	5	1171	0.00426985	chromodomain-helicase-DNA-binding protein 4	3	3	1906.33	0.00157371
sodium bicarbonate cotransporter 3	5	1131	0.00442087	sacsin	11	3	4558	0.000658287
sodium bicarbonate cotransporter 3	5	1090	0.00458716	chondroitin sulfate glucuronyltransferase	15	3	768	0.00390636
multiple PDZ domain protein	5	2037	0.00245459	protein SETSIP	29	3	302	0.00993377
multiple PDZ domain protein	5	2008	0.00249004	coiled-coil domain-containing protein 187	13	3	1253	0.00255756
obscurin	5	8923	0.00056035	next to BRCA1 gene 1 protein	4	3	926.182	0.00324607
otogelin	5	2925	0.0017094	epididymis-specific alpha-mannosidase	2	3	983.5	0.00305238
homeodomain-interacting protein kinase 3	5	1194	0.0041876	sodium channel protein type 10 subunit alpha	7	3	1924.5	0.00155975
homeodomain-interacting protein kinase 3	5	1194	0.0041876	cilia- and flagella-associated protein 54	8	3	3128.5	0.000959029
protein MON2 homolog	5	1675	0.00298507	glucocorticoid modulatory element-binding protein 1	8	3	543.5	0.00563782
protein MON2 homolog	5	1711	0.00292227	E3 SUMO-protein ligase PIAS1	9	3	628.556	0.0048246
protein MON2 homolog	5	1688	0.00296209	AT-rich interactive domain-containing protein 2	9	3	1676.75	0.00182742
FH1/FH2 domain-containing protein 3	5	1622	0.00308261	zinc finger protein 462	24	3	2330.33	0.00133287
DNA polymerase zeta catalytic subunit	5	3052	0.00163827	WD repeat-containing protein 49	14	3	955.5	0.00323609
DNA polymerase zeta catalytic subunit	5	3052	0.00163827	protein dispatched homolog 1	2	3	1475.46	0.0020414
otogelin	5	2913	0.00171644	DENN domain-containing protein 1A	7	3	1019.71	0.00295765
putative maltase-glucoamylase-like protein FLJ16351	5	2515	0.00198807	complement C1r subcomponent	9	3	712	0.00421389
pecanex-like protein 1	5	2230	0.00224215	leishmanolysin-like peptidase 2	8	3	788	0.00380711
rho GTPase-activating protein 7	5	1125	0.00444444	dual oxidase 2	2	3	1548	0.00193798
protein mono-ADP-ribosyltransferase PARP10	5	1037	0.0048216	myotubularin-related protein 5	1	3	1885	0.00159161
envoplakin	5	2055	0.00243309	tudor domain-containing protein 1	6	3	1135.45	0.00264816
sodium bicarbonate cotransporter 3	5	1259	0.00397141	multimerin-1	16	3	1216.33	0.00246689
sodium bicarbonate cotransporter 3	5	1246	0.00401284	serine/threonine-protein phosphatase 1 regulatory subunit 10	3	3	940	0.00319149
sodium bicarbonate cotransporter 3	5	1210	0.00413223	plexin-B2	7	3	1840.96	0.00162983
sodium bicarbonate cotransporter 3	5	1206	0.00414594	insulin receptor substrate 4	11	3	1267.25	0.00236785
sodium bicarbonate cotransporter 3	5	1095	0.00456621	collagen alpha-1(XIV) chain	8	3	1792	0.00167413
sodium bicarbonate cotransporter 3	5	1135	0.00440529	alpha-amylase 2B	1	3	511	0.00587084
protein NPAT	5	1434	0.00348675	cadherin EGF LAG seven-pass G-type receptor 3	5	3	3312	0.000905797
multiple PDZ domain protein	5	2070	0.00241546	ATP-binding cassette sub-family A member 2	5	3	2445.67	0.0012267
thyroid adenoma-associated protein	5	1912	0.00261506	zinc finger protein 40	8	3	2674.87	0.00112749
unconventional myosin-XVIIIa	5	1581	0.00316256	transcription factor jun-B	1	3	347	0.00864553
rho GTPase-activating protein 7	5	1528	0.00327225	prolow-density lipoprotein receptor-related protein 1	3	3	4552.5	0.000658981
rho GTPase-activating protein 7	5	1017	0.00491642	nidogen-1	4	3	1226	0.0024477
rho GTPase-activating protein 7	5	1017	0.00491642	spectrin beta chain, non-erythrocytic 1	3	3	2336.25	0.0012853
rho GTPase-activating protein 7	5	1017	0.00491642	protein-glutamine gamma-glutamyltransferase 4	15	3	706.5	0.0042506
protein TANC1	5	1738	0.00287687	ubiquitin-like modifier-activating enzyme 7	3	3	974.8	0.00308214
protein TANC1	5	1854	0.00269687	diacylglycerol kinase epsilon	14	3	566.5	0.00537839
protein TANC1	5	1854	0.00269687	protocadherin-16	1	3	3298	0.000909642
dyslexia-associated protein KIAA0319	5	1072	0.00466418	FYVE, RhoGEF and PH domain-containing protein 1	7	3	961	0.00312175
dyslexia-associated protein KIAA0319	5	1066	0.00469043	insulin receptor substrate 1	15	3	1242	0.00241546
dyslexia-associated protein KIAA0319	5	1039	0.00481232	laminin subunit alpha-1	4	3	3075	0.00097561
dyslexia-associated protein KIAA0319	5	1027	0.00486855	laminin subunit alpha-5	3	3	3391.6	0.000915868
dyslexia-associated protein KIAA0319	5	978	0.00511247	lysosome-associated membrane glycoprotein 1	3	3	407.5	0.00736597
dyslexia-associated protein KIAA0319	5	978	0.00511247	caprin-1	5	3	701.5	0.00427704
nuclear pore complex protein Nup98-Nup96	5	1817	0.00275179	polycystic kidney disease and receptor for egg jelly-related protein	7	3	2253	0.00133156
zinc finger protein 469	5	3953	0.00126486	eIF-2-alpha kinase activator GCN1	4	3	2671	0.00112317
nck-associated protein 5-like	5	1334	0.00374813	E3 ubiquitin-protein ligase RBBP6	5	3	1775	0.0016903
DNA polymerase zeta catalytic subunit	5	3130	0.00159744	transcription initiation factor TFIID subunit 5	10	3	772.5	0.00388842
multiple PDZ domain protein	5	2103	0.00237756	receptor-type tyrosine-protein phosphatase T	15	3	1463.83	0.00205042
multiple PDZ domain protein	5	2037	0.00245459	follistatin-related protein 1	6	3	269.5	0.0113636
multiple PDZ domain protein	5	2037	0.00245459	triple functional domain protein	9	3	2987.75	0.00100711
multiple PDZ domain protein	5	2037	0.00245459	utrophin	8	3	3374.73	0.000893705
multiple PDZ domain protein	5	2008	0.00249004	exocyst complex component 3	10	3	745	0.00402685
multiple PDZ domain protein	5	2000	0.0025	microtubule-actin cross-linking factor 1	9	3	5430	0.000552486
multiple PDZ domain protein	5	2000	0.0025	U5 small nuclear ribonucleoprotein 200 kDa helicase	5	3	2136	0.00140449
multiple PDZ domain protein	5	2000	0.0025	phosphoinositide 3-kinase regulatory subunit 4	4	3	1358	0.00220913
multiple PDZ domain protein	5	2000	0.0025	importin-13	1	3	963	0.00311526
multiple PDZ domain protein	5	2000	0.0025	syndecan-3	7	3	442	0.00678733
multiple PDZ domain protein	5	1971	0.00253678	rootletin	3	3	2049.78	0.0014655
multiple PDZ domain protein	5	1971	0.00253678	ubiquitin carboxyl-terminal hydrolase 34	2	3	3546	0.000846024
transformation/transcription domain-associated protein	5	3873	0.00129099	msx2-interacting protein	6	3	3664	0.000818777
baculoviral IAP repeat-containing protein 6	5	4856	0.00102965	talin-2	8	3	2552	0.00117557
multiple PDZ domain protein	5	2070	0.00241546	NAD(+) hydrolase SARM1	24	3	724	0.00414365
sorbin and SH3 domain-containing protein 1	5	1606	0.00311333	stabilin-1	10	3	2424.45	0.00126935
sorbin and SH3 domain-containing protein 1	5	1619	0.00308833	HEAT repeat-containing protein 5A	6	3	2046	0.00146628
sorbin and SH3 domain-containing protein 1	5	1584	0.00315657	chromodomain-helicase-DNA-binding protein 5	20	3	1954	0.00153531
sorbin and SH3 domain-containing protein 1	5	1562	0.00320102	ATP-binding cassette sub-family A member 12	3	3	2490	0.00120944
sorbin and SH3 domain-containing protein 1	5	1628	0.00307125	remodeling and spacing factor 1	5	3	1426.33	0.00210366
obscurin	5	8925	0.000560224	F-box only protein 34	20	3	711.571	0.00421604
envoplakin	5	2033	0.00245942	WD repeat-containing protein 11	3	3	949.857	0.00326291
protein NPAT	5	1427	0.00350385	ubiquitin-like modifier-activating enzyme 6	5	3	1030.5	0.00291248
DNA polymerase zeta catalytic subunit	5	3130	0.00159744	transcription factor TFIIIB component B'' homolog	2	3	2502.38	0.0012044
histone-lysine N-methyltransferase 2D	5	5537	0.000903016	KICSTOR complex protein ITFG2	10	3	350.2	0.00902426
transformation/transcription domain-associated protein	5	3830	0.00130548	ATP-binding cassette sub-family A member 5	9	3	1642	0.00182704
sodium bicarbonate cotransporter 3	5	1214	0.00411862	protein phosphatase Slingshot homolog 1	7	3	953.455	0.00319587
multiple PDZ domain protein	5	2041	0.00244978	YLP motif-containing protein 1	2	3	1847	0.00166501
desmoplakin	5	2871	0.00174155	E3 ubiquitin-protein ligase BRE1A	3	3	975	0.00307692
reelin	5	3460	0.00144509	brefeldin A-inhibited guanine nucleotide-exchange protein 3	6	3	2177	0.00137804
TP53-binding protein 1	5	1972	0.0025355	V-type proton ATPase 116 kDa subunit a	2	3	840	0.00357143
homeodomain-interacting protein kinase 3	5	1215	0.00411523	chromobox protein homolog 8	13	3	389	0.00771208
golgin subfamily A member 3	5	1498	0.00333778	ANKHD1-EIF4EBP3 protein	27	3	2617	0.00114635
histone-lysine N-methyltransferase 2A	5	3969	0.00125976	neurolysin, mitochondrial	2	3	683.5	0.00439118
mucin-3A	5	3323	0.00150466	protein HEG homolog 1	4	3	1431	0.002099
rho GTPase-activating protein 7	5	1091	0.00458295	cingulin	9	3	1203	0.00249377
neural cell adhesion molecule L1-like protein	5	1224	0.00408497	immunoglobulin superfamily DCC subclass member 4	4	3	1203.4	0.00251603
protein piccolo	5	4935	0.00101317	spectrin beta chain, non-erythrocytic 4	5	3	2227.83	0.0014236
dyslexia-associated protein KIAA0319	5	1072	0.00466418	zinc finger protein 335	1	3	1189.75	0.00258555
pecanex-like protein 1	5	2341	0.00213584	iroquois-class homeodomain protein IRX-1	34	3	464.5	0.00646576
protein MON2 homolog	5	1717	0.00291206	androglobin	22	3	1667	0.00179964
protein PRRC2C	5	2817	0.00177494	cyclin-P	6	3	352	0.00866433
structural maintenance of chromosomes flexible hinge domain-containing protein 1	5	2005	0.00249377	pleckstrin homology domain-containing family H member 3	11	3	834.429	0.00360125
baculoviral IAP repeat-containing protein 6	5	4857	0.00102944	protein WWC2	2	3	1175.33	0.00255575
telomere-associated protein RIF1	5	2472	0.00202265	GPI mannosyltransferase 4	6	3	583.222	0.00527885
acrosomal protein KIAA1210	5	1709	0.00292569	protein HID1	5	3	787.5	0.00380953
E3 ubiquitin-protein ligase UBR4	5	5183	0.000964692	nicolin-1	12	3	213	0.0140845
WD repeat- and FYVE domain-containing protein 4	5	3184	0.00157035	zinc finger protein 528	20	3	637.091	0.00474684
extracellular matrix protein FRAS1	5	4012	0.00124626	zinc finger protein 503	7	3	646	0.00464396
protein mono-ADP-ribosyltransferase PARP10	5	1025	0.00487805	CUB and sushi domain-containing protein 1	7	3	3054.6	0.00101706
protein piccolo	5	5142	0.000972384	centrosomal protein of 295 kDa	4	3	2477.06	0.00121809
protein TANC1	5	1861	0.00268673	EMILIN-3	17	3	766	0.00391645
obscurin	5	6620	0.000755287	methyl-CpG-binding domain protein 6	2	3	999.857	0.00300072
VPS10 domain-containing receptor SorCS1	5	1168	0.00428082	serine/threonine-protein kinase 11-interacting protein	9	3	974.75	0.0031787
fibrocystin	5	4074	0.0012273	glutamate receptor ionotropic, NMDA 3A	8	3	1020	0.00296691
ATP-binding cassette sub-family A member 13	5	5058	0.000988533	arf-GAP with GTPase, ANK repeat and PH domain-containing protein 11	8	3	550	0.00545455
fibrocystin	5	3396	0.00147232	polycystic kidney disease protein 1-like 1	35	3	2884.5	0.0010402
reelin	5	3458	0.00144592	AP-5 complex subunit beta-1	10	3	878	0.00341686
dynein heavy chain 17, axonemal	5	4462	0.00112057	nucleoredoxin-like protein 1	9	3	212	0.0141509
rho GTPase-activating protein 7	5	1528	0.00327225	solute carrier family 7 member 13	48	3	465.5	0.00644529
usherin	5	5202	0.000961169	thiosulfate sulfurtransferase/rhodanese-like domain-containing protein 2	4	3	516	0.00581395
FRAS1-related extracellular matrix protein 2	5	3169	0.00157778	DC-STAMP domain-containing protein 2	29	3	589	0.00536955
protein PRRC2C	5	2903	0.00172236	zinc finger protein 296	7	3	475	0.00631579
protein PRRC2C	5	2901	0.00172354	checkpoint protein HUS1B	4	3	278	0.0107914
protein PRRC2C	5	2898	0.00172533	junction-mediating and -regulatory protein	10	3	963.667	0.00311414
protein PRRC2C	5	2898	0.00172533	nephrocystin-3	9	3	1330	0.00225564
protein PRRC2C	5	2869	0.00174277	adhesion G-protein coupled receptor G4	3	3	3059	0.000980806
protein PRRC2C	5	2858	0.00174948	voltage-dependent calcium channel subunit alpha-2/delta-4	4	3	1135	0.00264318
protein PRRC2C	5	2824	0.00177054	maestro heat-like repeat-containing protein family member 2B	12	3	1563	0.00192002
protein PRRC2C	5	2819	0.00177368	neuronal tyrosine-phosphorylated phosphoinositide-3-kinase adapter 1	4	3	841	0.00356718
protein PRRC2C	5	2779	0.00179921	protein PRR14L	17	3	2151	0.0013947
protein PRRC2C	5	2774	0.00180245	exocyst complex component 8	4	3	725	0.00413793
telomere-associated protein RIF1	5	2472	0.00202265	leucine-rich repeat transmembrane neuronal protein 1	4	3	522	0.00574713
protein TANC1	5	1871	0.00267237	periaxin	10	3	1444	0.00207785
homeodomain-interacting protein kinase 3	5	1215	0.00411523	inactive N-acetylated-alpha-linked acidic dipeptidase-like protein 2	56	3	757.1	0.00398615
MAX gene-associated protein	5	3115	0.00160514	OTU domain-containing protein 6A	14	3	288	0.0104167
MAX gene-associated protein	5	3115	0.00160514	SKI/DACH domain-containing protein 1	51	3	908	0.00330396
MAX gene-associated protein	5	3115	0.00160514	inactive ubiquitin carboxyl-terminal hydrolase 54	13	2.97143	1643.54	0.00182293
MAX gene-associated protein	5	3115	0.00160514	liprin-alpha-1	8	2.95	1219.6	0.00248055
MAX gene-associated protein	5	3115	0.00160514	la-related protein 1B	17	2.94118	889.971	0.00327408
MAX gene-associated protein	5	3114	0.00160565	protein capicua homolog	2	2.94118	2164.29	0.00141959
MAX gene-associated protein	5	2906	0.00172058	transmembrane protein 94	29	2.93103	1344.76	0.00218676
FH1/FH2 domain-containing protein 3	5	1559	0.00320718	hydrocephalus-inducing protein homolog	14	2.92857	3847.14	0.000802573
baculoviral IAP repeat-containing protein 6	5	4880	0.00102459	thyroglobulin	1	2.92308	2520.15	0.0011765
baculoviral IAP repeat-containing protein 6	5	4875	0.00102564	N-acyl-phosphatidylethanolamine-hydrolyzing phospholipase D	5	2.91667	372.5	0.00783367
baculoviral IAP repeat-containing protein 6	5	4870	0.00102669	polycystic kidney disease protein 1-like 3	10	2.91667	1472.25	0.002033
baculoviral IAP repeat-containing protein 6	5	4861	0.00102859	stAR-related lipid transfer protein 13	3	2.9	995.6	0.00292016
baculoviral IAP repeat-containing protein 6	5	4847	0.00103157	sodium/hydrogen exchanger 10	5	2.9	1073.4	0.00275411
baculoviral IAP repeat-containing protein 6	5	4840	0.00103306	DNA polymerase alpha catalytic subunit	2	2.9	1333.1	0.00218869
histone-lysine N-methyltransferase SETD5	5	1461	0.00342231	broad substrate specificity ATP-binding cassette transporter ABCG2	7	2.9	650.2	0.00445228
sodium bicarbonate cotransporter 3	5	1126	0.0044405	leucine-rich repeat-containing protein 9	6	2.9	1460.2	0.00198184
sodium bicarbonate cotransporter 3	5	1113	0.00449236	receptor-type tyrosine-protein phosphatase mu	20	2.89655	1342.72	0.00218176
golgin subfamily A member 3	5	1458	0.00342936	bifunctional UDP-N-acetylglucosamine 2-epimerase/N-acetylmannosamine kinase	8	2.88889	684	0.00423077
golgin subfamily A member 3	5	1307	0.00382555	probable E3 ubiquitin-protein ligase HERC1	14	2.88889	4655.78	0.000625066
pecanex-like protein 1	5	2349	0.00212857	puratrophin-1	8	2.875	1180.88	0.00242926
pecanex-like protein 1	5	2348	0.00212947	von Willebrand factor D and EGF domain-containing protein	7	2.875	1424.38	0.0020372
pecanex-like protein 1	5	2344	0.00213311	myoferlin	19	2.875	1997.5	0.0014356
pecanex-like protein 1	5	2336	0.00214041	protein CASP	3	2.85714	688.429	0.00415524
pecanex-like protein 1	5	2312	0.00216263	proteasome adapter and scaffold protein ECM29	12	2.85714	1775	0.00160323
pecanex-like protein 1	5	2243	0.00222916	trinucleotide repeat-containing gene 18 protein	9	2.84615	2812.23	0.00100896
WD repeat- and FYVE domain-containing protein 4	5	3184	0.00157035	oxysterol-binding protein-related protein 3	5	2.84615	826.308	0.00340239
rho GTPase-activating protein 7	5	1528	0.00327225	lysosomal-trafficking regulator	25	2.83333	3378.5	0.000872471
protein PRRC2C	5	2896	0.00172652	histone deacetylase 7	9	2.83333	931.167	0.00304932
ryanodine receptor 2	5	4906	0.00101916	sodium/hydrogen exchanger 9B2	20	2.83333	481.833	0.00591591
baculoviral IAP repeat-containing protein 6	5	4878	0.00102501	BPI fold-containing family C protein	22	2.83333	488.833	0.00578849
baculoviral IAP repeat-containing protein 6	5	4864	0.00102796	chromodomain-helicase-DNA-binding protein 6	4	2.81818	2434.82	0.00120594
baculoviral IAP repeat-containing protein 6	5	4851	0.00103072	lipase member M	4	2.8	326.6	0.00843056
thyroid adenoma-associated protein	5	1913	0.0026137	receptor-type tyrosine-protein phosphatase zeta	2	2.8	1965.4	0.00131545
protein TANC1	5	1861	0.00268673	glutamyl aminopeptidase	1	2.8	854.8	0.00316167
protein TANC1	5	1826	0.00273823	pecanex-like protein 2	3	2.8	1564.2	0.00171644
neural cell adhesion molecule L1-like protein	5	1224	0.00408497	1-phosphatidylinositol 4,5-bisphosphate phosphodiesterase beta-3	15	2.8	1098.4	0.00257551
neural cell adhesion molecule L1-like protein	5	1224	0.00408497	lipopolysaccharide-responsive and beige-like anchor protein	8	2.8	2439.3	0.0013676
neural cell adhesion molecule L1-like protein	5	1224	0.00408497	macrophage-stimulating protein receptor	1	2.8	1341	0.00208688
sodium bicarbonate cotransporter 3	5	1255	0.00398406	fibroblast growth factor receptor 4	2	2.8	780.4	0.00357675
multiple PDZ domain protein	5	2070	0.00241546	phosphatidylinositol 4-kinase alpha	10	2.8	1915.2	0.00148781
multiple PDZ domain protein	5	2070	0.00241546	collagen alpha-3(VI) chain	2	2.8	2529.9	0.00119639
multiple PDZ domain protein	5	2041	0.00244978	GRB2-associated-binding protein 2	2	2.8	613.2	0.0045575
retroelement silencing factor 1	5	1676	0.00298329	DNA excision repair protein ERCC-6-like 2	5	2.77778	1225.56	0.00238756
nck-associated protein 5-like	5	1334	0.00374813	kinesin-like protein KIF18B	8	2.77778	807.111	0.00337989
histone-lysine N-methyltransferase 2D	5	5540	0.000902527	tetratricopeptide repeat protein 6	3	2.77778	1554.56	0.00180537
histone-lysine N-methyltransferase 2D	5	5536	0.000903179	enoyl-[acyl-carrier-protein] reductase, mitochondrial	13	2.77419	335.258	0.00818716
golgin subfamily A member 3	5	1498	0.00333778	A-kinase anchor protein 9	2	2.77273	3609.18	0.000779045
golgin subfamily A member 3	5	1498	0.00333778	target of Nesh-SH3	2	2.76786	1678.77	0.00164149
E3 ubiquitin-protein ligase MYCBP2	5	4797	0.00104232	girdin	5	2.75	1863.69	0.00145961
E3 ubiquitin-protein ligase MYCBP2	5	4794	0.00104297	polypeptide N-acetylgalactosaminyltransferase-like 6	6	2.75	486.25	0.0056727
E3 ubiquitin-protein ligase MYCBP2	5	4772	0.00104778	B-cell scaffold protein with ankyrin repeats	1	2.75	736.75	0.00370904
E3 ubiquitin-protein ligase MYCBP2	5	4763	0.00104976	myb-binding protein 1A	9	2.75	1214	0.00226215
E3 ubiquitin-protein ligase MYCBP2	5	4761	0.0010502	protein TASOR	2	2.75	1481.12	0.00184819
E3 ubiquitin-protein ligase MYCBP2	5	4697	0.00106451	ornithine decarboxylase	10	2.75	428.75	0.00638672
pecanex-like protein 1	5	1423	0.0035137	helicase ARIP4	1	2.75	1364.25	0.00200723
MAX gene-associated protein	5	3115	0.00160514	discoidin, CUB and LCCL domain-containing protein 1	5	2.75	592.5	0.00465966
protein unc-80 homolog	5	1950	0.0025641	interleukin-3 receptor subunit alpha	4	2.75	367.75	0.00737164
protein TANC1	5	1885	0.00265252	zinc finger FYVE domain-containing protein 9	17	2.75	1345.75	0.00203013
protein TANC1	5	1879	0.00266099	mediator of RNA polymerase II transcription subunit 13	4	2.75	2059.5	0.00133138
protein TANC1	5	1879	0.00266099	nuclear pore membrane glycoprotein 210	6	2.75	1259.75	0.00230793
protein TANC1	5	1853	0.00269833	discoidin, CUB and LCCL domain-containing protein 2	1	2.75	703	0.0039252
protein TANC1	5	1697	0.00294638	RING finger protein 17	1	2.73333	1616.8	0.00167226
fibrocystin	5	4074	0.0012273	reticulon-4	5	2.72727	823.455	0.00364936
fibrocystin	5	4028	0.00124131	clathrin heavy chain linker domain-containing protein 1	2	2.72727	451.273	0.00610273
fibrocystin	5	3860	0.00129534	putative short-chain dehydrogenase/reductase family 42E member 2	10	2.71429	522.857	0.00498058
fibrocystin	5	3416	0.0014637	protein unc-13 homolog C	22	2.71429	2065.71	0.00128286
fibrocystin	5	3402	0.00146972	immunoglobulin-like and fibronectin type III domain-containing protein 1	2	2.71429	3303.29	0.000820084
fibrocystin	5	3395	0.00147275	GTPase-activating protein and VPS9 domain-containing protein 1	1	2.7037	1334.11	0.00199498
dyslexia-associated protein KIAA0319	5	1027	0.00486855	polycystin-1	9	2.7	4043.3	0.000662998
ATP-binding cassette sub-family A member 13	5	5059	0.000988338	uncharacterized protein KIAA2026	1	2.7	1610.6	0.00178134
ATP-binding cassette sub-family A member 13	5	5028	0.000994431	nebulin-related-anchoring protein	2	2.7	1688.5	0.00159549
ATP-binding cassette sub-family A member 13	5	5028	0.000994431	leukocyte tyrosine kinase receptor	2	2.7	832.1	0.00323334
ATP-binding cassette sub-family A member 13	5	5013	0.000997407	ankyrin repeat domain-containing protein 24	6	2.69231	1161.62	0.00226865
ATP-binding cassette sub-family A member 13	5	4950	0.0010101	vacuolar protein sorting-associated protein 13C	2	2.66667	3383.5	0.000784157
ATP-binding cassette sub-family A member 13	5	4602	0.00108648	ribosomal oxygenase 2	8	2.66667	426.167	0.00609323
protein mono-ADP-ribosyltransferase PARP10	5	1016	0.00492126	transmembrane protein 8B	11	2.66667	705.667	0.00400233
coiled-coil domain-containing protein 168	5	7041	0.000710126	latent-transforming growth factor beta-binding protein 3	1	2.66667	1183.83	0.0022534
MAX gene-associated protein	5	3005	0.00166389	transmembrane channel-like protein 4	8	2.66667	656.667	0.00402865
MAX gene-associated protein	5	3004	0.00166445	unconventional myosin-Ia	1	2.66667	984	0.00268737
TP53-binding protein 1	5	1927	0.00259471	protocadherin-23	5	2.66667	2557	0.00107293
TP53-binding protein 1	5	1700	0.00294118	sperm-associated antigen 1	5	2.66667	856.889	0.00306049
KAT8 regulatory NSL complex subunit 1	5	1071	0.00466853	ankyrin repeat domain-containing protein 50	8	2.66667	1369.33	0.00193291
dynein heavy chain 17, axonemal	5	4466	0.00111957	stAR-related lipid transfer protein 9	1	2.66667	4401.93	0.000602526
structural maintenance of chromosomes flexible hinge domain-containing protein 1	5	2067	0.00241896	inactive hydroxysteroid dehydrogenase-like protein 1	1	2.66667	311.667	0.00848485
structural maintenance of chromosomes flexible hinge domain-containing protein 1	5	2004	0.00249501	serine/threonine-protein kinase MRCK beta	6	2.66667	1629.33	0.0016538
FH1/FH2 domain-containing protein 3	5	1642	0.00304507	dedicator of cytokinesis protein 3	1	2.64706	1783.18	0.00150708
FH1/FH2 domain-containing protein 3	5	1634	0.00305998	IQ motif and SEC7 domain-containing protein 3	1	2.625	1011.12	0.0025212
FH1/FH2 domain-containing protein 3	5	1617	0.00309215	uncharacterized protein C10orf68	9	2.625	1149.9	0.00226317
FH1/FH2 domain-containing protein 3	5	1615	0.00309598	chromodomain-helicase-DNA-binding protein 7	1	2.625	2583.62	0.00103196
FH1/FH2 domain-containing protein 3	5	1543	0.00324044	alpha-2-macroglobulin	5	2.6	1431.6	0.00180417
FH1/FH2 domain-containing protein 3	5	1609	0.00310752	teneurin-1	11	2.6	2405.8	0.00109657
neural cell adhesion molecule L1-like protein	5	1224	0.00408497	cell division cycle-associated protein 3	1	2.6	203.4	0.0148126
neural cell adhesion molecule L1-like protein	5	1208	0.00413907	sterol regulatory element-binding protein 2	15	2.6	996.4	0.00261542
neural cell adhesion molecule L1-like protein	5	1208	0.00413907	polyphosphoinositide phosphatase	1	2.6	771.4	0.00336876
neural cell adhesion molecule L1-like protein	5	1171	0.00426985	serine/threonine-protein kinase MRCK gamma	11	2.58333	1370.58	0.00189277
histone-lysine N-methyltransferase SETD5	5	1493	0.00334896	chloride channel protein 2	1	2.57143	816	0.00308033
histone-lysine N-methyltransferase SETD5	5	1474	0.00339213	tyrosine-protein kinase JAK2	6	2.57143	995	0.00259105
sodium bicarbonate cotransporter 3	5	1250	0.004	plasma membrane calcium-transporting ATPase 1	13	2.55556	1164.83	0.00222288
sodium bicarbonate cotransporter 3	5	1223	0.00408831	NAD(P) transhydrogenase, mitochondrial	1	2.55556	945.778	0.00261198
sodium bicarbonate cotransporter 3	5	1201	0.0041632	zinc finger FYVE domain-containing protein 16	3	2.53846	1225.69	0.00217295
sodium bicarbonate cotransporter 3	5	1122	0.00445633	intersectin-2	7	2.52941	1458.65	0.00171337
sodium bicarbonate cotransporter 3	5	1099	0.00454959	protein furry homolog-like	3	2.52941	2852.41	0.000915054
golgin subfamily A member 3	5	1407	0.00355366	versican core protein	12	2.5	2025.5	0.00129198
E3 ubiquitin-protein ligase MYCBP2	5	4688	0.00106655	nitric oxide synthase, endothelial	4	2.5	760.5	0.00349108
E3 ubiquitin-protein ligase MYCBP2	5	3842	0.00130141	maestro heat-like repeat-containing protein family member 7	8	2.5	1082	0.00232285
DNA polymerase zeta catalytic subunit	5	3157	0.00158378	ectonucleoside triphosphate diphosphohydrolase 1	7	2.5	445.05	0.00573685
DNA polymerase zeta catalytic subunit	5	3156	0.00158428	ankyrin repeat domain-containing protein 31	7	2.5	1810.57	0.0013678
DNA polymerase zeta catalytic subunit	5	3131	0.00159693	tight junction protein ZO-1	3	2.5	1768.9	0.00141501
DNA polymerase zeta catalytic subunit	5	3079	0.0016239	autophagy-related protein 2 homolog A	2	2.5	1832.25	0.00133281
DNA polymerase zeta catalytic subunit	5	3079	0.0016239	5'-nucleotidase	17	2.5	549	0.00452164
nck-associated protein 5-like	5	1334	0.00374813	unconventional myosin-IXb	8	2.5	2089.5	0.00118997
histone-lysine N-methyltransferase 2D	5	5556	0.000899928	SUMO-activating enzyme subunit 2	5	2.5	650	0.00385447
histone-lysine N-methyltransferase 2D	5	5555	0.00090009	proteasome activator complex subunit 4	2	2.5	1590.67	0.00154201
histone-lysine N-methyltransferase 2D	5	5553	0.000900414	inactive ubiquitin thioesterase OTULINL	11	2.5	277	0.00926399
histone-lysine N-methyltransferase 2D	5	5552	0.000900576	kiSS-1 receptor	11	2.5	312	0.00819362
histone-lysine N-methyltransferase 2D	5	5549	0.000901063	tektin-4	2	2.5	369.75	0.00666886
histone-lysine N-methyltransferase 2D	5	5525	0.000904977	putative tyrosine-protein phosphatase TPTE	8	2.5	502.5	0.00483561
WD repeat- and FYVE domain-containing protein 4	5	3224	0.00155087	peroxisomal N(1)-acetyl-spermine/spermidine oxidase	4	2.5	498.5	0.00504337
WD repeat- and FYVE domain-containing protein 4	5	3217	0.00155424	transmembrane channel-like protein 8	2	2.46667	588.133	0.00428246
WD repeat- and FYVE domain-containing protein 4	5	3184	0.00157035	protein DENND6B	3	2.45455	542.545	0.00433859
E3 ubiquitin-protein ligase UBR4	5	5266	0.000949487	dynein heavy chain 7, axonemal	1	2.45455	3336.18	0.000737607
E3 ubiquitin-protein ligase UBR4	5	5264	0.000949848	protein sidekick-1	5	2.45455	1587	0.00154603
E3 ubiquitin-protein ligase UBR4	5	5231	0.00095584	neuronal PAS domain-containing protein 3	1	2.44444	923.333	0.00263417
E3 ubiquitin-protein ligase UBR4	5	5220	0.000957854	ubiquitin-associated protein 2-like	1	2.44118	1063.91	0.0022977
histone-lysine N-methyltransferase 2A	5	4005	0.00124844	fibronectin type III domain-containing protein 3B	4	2.42857	1079.43	0.00225457
histone-lysine N-methyltransferase 2A	5	4004	0.00124875	ATP-dependent RNA helicase SUPV3L1, mitochondrial	2	2.42857	620	0.00396355
histone-lysine N-methyltransferase 2A	5	4002	0.00124938	cubilin	15	2.4	2657.8	0.000889865
protein NPAT	5	1436	0.00348189	xin actin-binding repeat-containing protein 2	2	2.4	2418.6	0.00100633
teneurin-4	5	1917	0.00260824	spectrin alpha chain, erythrocytic 1	3	2.4	2197.4	0.0010587
protein PRRC2C	5	2896	0.00172652	unconventional myosin-X	5	2.4	1667.8	0.00143424
protein PRRC2C	5	2853	0.00175254	limbin	6	2.4	1216.4	0.00198637
protein PRRC2C	5	2790	0.00179211	opioid growth factor receptor-like protein 1	4	2.4	444.6	0.00537803
E3 ubiquitin-protein ligase UBR4	5	5265	0.000949668	myomegalin	6	2.39216	2362.96	0.00101921
E3 ubiquitin-protein ligase UBR4	5	5238	0.000954563	katanin-interacting protein	2	2.38889	1516.17	0.00157156
E3 ubiquitin-protein ligase UBR4	5	5232	0.000955657	myelin regulatory factor-like protein	1	2.38462	758.154	0.00304466
E3 ubiquitin-protein ligase UBR4	5	5227	0.000956572	importin subunit alpha-8	2	2.36364	516.818	0.00456277
E3 ubiquitin-protein ligase UBR4	5	5219	0.000958038	microfibrillar-associated protein 3-like	8	2.35714	389.357	0.00606909
E3 ubiquitin-protein ligase UBR4	5	5203	0.000960984	phosphatidylinositol 3,4,5-trisphosphate-dependent Rac exchanger 2 protein	7	2.33333	1247.33	0.00174691
E3 ubiquitin-protein ligase UBR4	5	5186	0.000964134	RAS guanyl-releasing protein 2	3	2.33333	622.133	0.00378057
protein phosphatase 1 regulatory subunit 12B	5	1059	0.00472144	putative tyrosine-protein phosphatase auxilin	9	2.33333	927.667	0.00250186
protein phosphatase 1 regulatory subunit 12B	5	1058	0.0047259	C2 domain-containing protein 3	2	2.33333	2045.44	0.00113667
protein phosphatase 1 regulatory subunit 12B	5	998	0.00501002	spindle and centriole-associated protein 1	2	2.33333	859.667	0.0027102
protein phosphatase 1 regulatory subunit 12B	5	997	0.00501505	syntaxin-binding protein 1	8	2.33333	583.667	0.00399563
telomere-associated protein RIF1	5	2464	0.00202922	transcriptional enhancer factor TEF-3	3	2.33333	376.667	0.00595459
telomere-associated protein RIF1	5	2441	0.00204834	dynein heavy chain 1, axonemal	11	2.33333	3945.5	0.000569749
telomere-associated protein RIF1	5	2436	0.00205255	zinc finger SWIM domain-containing protein 5	1	2.33333	936.667	0.0024888
telomere-associated protein RIF1	5	2433	0.00205508	A disintegrin and metalloproteinase with thrombospondin motifs 7	11	2.33333	1494	0.00158971
baculoviral IAP repeat-containing protein 6	5	4858	0.00102923	FRAS1-related extracellular matrix protein 1	2	2.31818	1681.59	0.00139246
baculoviral IAP repeat-containing protein 6	5	4847	0.00103157	histone acetyltransferase KAT6B	1	2.31579	1811.16	0.00127701
baculoviral IAP repeat-containing protein 6	5	4837	0.0010337	E3 ubiquitin-protein ligase MIB2	5	2.3125	1121.91	0.00203287
baculoviral IAP repeat-containing protein 6	5	4715	0.00106045	rotatin	17	2.29412	1888.29	0.00121988
protein TANC1	5	1878	0.00266241	stabilin-2	12	2.28571	2034	0.00122951
protein TANC1	5	1883	0.00265534	centrosomal protein of 55 kDa	1	2.28571	343.286	0.00668991
protein TANC1	5	1883	0.00265534	tribbles homolog 3	7	2.28571	365.714	0.00621677
protein TANC1	5	1871	0.00267237	GATOR complex protein MIOS	4	2.28571	748.429	0.00292008
protein TANC1	5	1879	0.00266099	neuroblastoma-amplified sequence	4	2.28571	2107.29	0.00104283
protein TANC1	5	1872	0.00267094	SH2 domain-containing protein 6	4	2.28571	288.929	0.00782923
protein TANC1	5	1844	0.0027115	cyclic nucleotide-gated cation channel beta-1	2	2.25	915.75	0.00261409
protein TANC1	5	1838	0.00272035	androgen receptor	1	2.25	696	0.00340267
protein TANC1	5	1791	0.00279174	ATP-dependent translocase ABCB1	13	2.25	1297.5	0.00172743
protein TANC1	5	1790	0.0027933	deleted in lung and esophageal cancer protein 1	2	2.25	1692.25	0.00131371
protein TANC1	5	1773	0.00282008	ankyrin repeat and KH domain-containing protein 1	1	2.25	1091.5	0.00276476
neural cell adhesion molecule L1-like protein	5	1224	0.00408497	microtubule-associated protein 4	1	2.2449	1235.73	0.0018283
neural cell adhesion molecule L1-like protein	5	1224	0.00408497	Hermansky-Pudlak syndrome 1 protein	2	2.2381	556	0.0039934
neural cell adhesion molecule L1-like protein	5	1224	0.00408497	dynamin-1-like protein	1	2.23077	639.923	0.00331316
neural cell adhesion molecule L1-like protein	5	1208	0.00413907	maestro heat-like repeat-containing protein family member 1	3	2.22727	1657.55	0.00133717
neural cell adhesion molecule L1-like protein	5	1208	0.00413907	protein TASOR 2	4	2.20833	2531.62	0.000873133
neural cell adhesion molecule L1-like protein	5	1208	0.00413907	transmembrane protein 168	1	2.2	559.4	0.00373038
neural cell adhesion molecule L1-like protein	5	1171	0.00426985	lysosome-associated membrane glycoprotein 3	5	2.2	395.2	0.00564385
neural cell adhesion molecule L1-like protein	5	1171	0.00426985	dynein heavy chain 5, axonemal	1	2.1875	3776.62	0.000592324
histone-lysine N-methyltransferase SETD5	5	1493	0.00334896	unconventional myosin-XIX	3	2.1875	918	0.00235587
histone-lysine N-methyltransferase SETD5	5	1480	0.00337838	sodium-driven chloride bicarbonate exchanger	15	2.17241	1093.28	0.00199228
histone-lysine N-methyltransferase SETD5	5	1461	0.00342231	cyclin-D-binding Myb-like transcription factor 1	11	2.16667	672.917	0.00339564
sodium bicarbonate cotransporter 3	5	1135	0.00440529	EF-hand calcium-binding domain-containing protein 8	1	2.16667	1060.67	0.00214267
sodium bicarbonate cotransporter 3	5	1118	0.00447227	vasoactive intestinal polypeptide receptor 2	3	2.15385	408.154	0.00534285
transmembrane protein KIAA1109	5	4170	0.00119904	rho GTPase-activating protein 22	4	2.15	576.55	0.00425594
transmembrane protein KIAA1109	5	2859	0.00174886	sodium/bile acid cotransporter 7	2	2.14286	286.571	0.0074931
fibrocystin	5	4074	0.0012273	solute carrier family 22 member 14	3	2.125	600.625	0.00356746
fibrocystin	5	4049	0.00123487	leucine-rich repeats and immunoglobulin-like domains protein 1	1	2.11111	879.222	0.00236982
fibrocystin	5	4009	0.00124719	leucine-rich repeat serine/threonine-protein kinase 2	1	2.1	1813.1	0.00116689
fibrocystin	5	3986	0.00125439	dipeptidyl peptidase 9	17	2	813.206	0.00250574
fibrocystin	5	3403	0.00146929	putative transferase CAF17, mitochondrial	6	2	259.5	0.00728097
DNA polymerase zeta catalytic subunit	5	3078	0.00162443	valine--tRNA ligase, mitochondrial	1	2	1026.33	0.00190321
DNA polymerase zeta catalytic subunit	5	3078	0.00162443	magnesium transporter NIPA4	3	2	346.25	0.00564957
DNA polymerase zeta catalytic subunit	5	3078	0.00162443	bromodomain-containing protein 7	12	2	603.5	0.00334951
dyslexia-associated protein KIAA0319	5	1063	0.00470367	ubiquitin thioesterase OTU1	4	2	326	0.00637099
dyslexia-associated protein KIAA0319	5	1047	0.00477555	polycystic kidney disease protein 1-like 2	13	2	1382.5	0.00135009
dyslexia-associated protein KIAA0319	5	1039	0.00481232	cilia- and flagella-associated protein 47	10	2	2186.75	0.000903487
dyslexia-associated protein KIAA0319	5	986	0.00507099	lactotransferrin	4	2	695.25	0.00284972
dyslexia-associated protein KIAA0319	5	978	0.00511247	protein NOXP20	3	2	481.625	0.00397839
dyslexia-associated protein KIAA0319	5	978	0.00511247	thimet oligopeptidase	20	2	584.5	0.00321873
dyslexia-associated protein KIAA0319	5	937	0.00533618	TATA box-binding protein-associated factor RNA polymerase I subunit C	2	2	829.3	0.00239704
multiple PDZ domain protein	5	2042	0.00244858	activating signal cointegrator 1 complex subunit 3	1	2	1692	0.00201558
multiple PDZ domain protein	5	2008	0.00249004	phosphatidylinositide phosphatase SAC2	5	2	858.727	0.00255243
WD repeat- and FYVE domain-containing protein 4	5	3184	0.00157035	leucine-rich repeat-containing protein 36	9	2	569.941	0.00350755
homeodomain-interacting protein kinase 3	5	1215	0.00411523	transient receptor potential cation channel subfamily M member 8	17	2	952.167	0.0021865
teneurin-4	5	2794	0.00178955	lysine-specific demethylase 7A	16	2	760	0.00245761
teneurin-4	5	2769	0.00180571	phosphatidylinositol 3,4,5-trisphosphate 3-phosphatase TPTE2	15	2	392.75	0.00502578
protein NPAT	5	1368	0.00365497	tripartite motif-containing protein 35	24	2	350	0.00580771
protein NPAT	5	1368	0.00365497	coiled-coil domain-containing protein 137	3	2	212	0.00911483
protein MON2 homolog	5	1718	0.00291036	protein RRNAD1	18	2	373.667	0.0055994
protein MON2 homolog	5	1712	0.00292056	rho GTPase-activating protein 23	14	2	1301.64	0.00156419
WASH complex subunit 4	5	941	0.0053135	ligand-dependent nuclear receptor corepressor-like protein	18	2	1105.5	0.00221452
inositol 1,4,5-trisphosphate receptor type 2	5	1733	0.00288517	argininosuccinate lyase	6	2	452.5	0.00442285
E3 ubiquitin-protein ligase MYCBP2	5	4778	0.00104646	complement C3	44	2	1663	0.00120265
E3 ubiquitin-protein ligase MYCBP2	5	4753	0.00105197	voltage-dependent P/Q-type calcium channel subunit alpha-1A	8	2	2361.6	0.000849044
E3 ubiquitin-protein ligase MYCBP2	5	4663	0.00107227	collagen alpha-2(I) chain	11	2	1366	0.00146413
E3 ubiquitin-protein ligase MYCBP2	5	4532	0.00110327	collagen alpha-1(V) chain	39	2	1797	0.00111415
pecanex-like protein 1	5	2235	0.00223714	dihydrolipoyl dehydrogenase, mitochondrial	9	2	466.5	0.00431524
pecanex-like protein 1	5	1421	0.00351865	sulfate transporter	5	2	739	0.00270636
NLR family CARD domain-containing protein 3	5	1039	0.00481232	erythrocyte membrane protein band 4.2	12	2	703.25	0.0028469
NLR family CARD domain-containing protein 3	5	1030	0.00485437	DNA repair protein complementing XP-G cells	11	2	1186	0.00168634
zinc finger protein 469	5	3953	0.00126486	DNA excision repair protein ERCC-6	16	2	1493	0.00133958
KAT8 regulatory NSL complex subunit 1	5	878	0.00569476	electron transfer flavoprotein subunit alpha, mitochondrial	28	2	308.5	0.00652413
structural maintenance of chromosomes flexible hinge domain-containing protein 1	5	1879	0.00266099	glycine receptor subunit alpha-1	20	2	424	0.00476506
FH1/FH2 domain-containing protein 3	5	1560	0.00320513	sonic hedgehog protein	32	2	404	0.00499856
FH1/FH2 domain-containing protein 3	5	1557	0.0032113	lysosomal acid lipase/cholesteryl ester hydrolase	9	2	399	0.00501253
FH1/FH2 domain-containing protein 3	5	1553	0.00321958	myeloperoxidase	8	2	745	0.00268456
FH1/FH2 domain-containing protein 3	5	1564	0.00319693	DNA mismatch repair protein Msh2	6	2	925	0.00216584
E3 ubiquitin-protein ligase HUWE1	5	4367	0.00114495	NPC intracellular cholesterol transporter 1	6	2	1278.78	0.00156418
multiple PDZ domain protein	5	2070	0.00241546	peroxisome biogenesis factor 6	16	2	941.333	0.00212794
golgin subfamily A member 3	5	1498	0.00333778	vitamin K-dependent protein S	5	2	692	0.00289172
golgin subfamily A member 3	5	1498	0.00333778	retinoblastoma-associated protein	36	2	884.5	0.00226665
golgin subfamily A member 3	5	1498	0.00333778	retinal-specific phospholipid-transporting ATPase ABCA4	13	2	2273	0.000879894
golgin subfamily A member 3	5	1498	0.00333778	thrombomodulin	15	2	575	0.00347826
golgin subfamily A member 3	5	1458	0.00342936	hamartin	6	2	1129.25	0.00177501
pecanex-like protein 1	5	1459	0.003427	thyrotropin receptor	4	2	733	0.00273874
dynein heavy chain 17, axonemal	5	4418	0.00113173	cytochrome b-245 heavy chain	1	2	570	0.00350877
FH1/FH2 domain-containing protein 3	5	1467	0.00340832	keratin, type II cytoskeletal 5	5	2	590	0.00338983
telomere-associated protein RIF1	5	2464	0.00202922	neural cell adhesion molecule L1	1	2	1253.75	0.00159523
protein TANC1	5	1756	0.00284738	peroxisome biogenesis factor 1	3	2	1071	0.00197694
N(4)-(beta-N-acetylglucosaminyl)-L-asparaginase	4	346	0.0115607	collagen alpha-1(XVII) chain	4	2	1497	0.00133601
Hermansky-Pudlak syndrome 1 protein	4	700	0.00571429	von Willebrand factor	18	2	2813	0.000710985
laminin subunit alpha-2	4	3122	0.00128123	C-X-C chemokine receptor type 1	2	2	350	0.00571429
glutamate receptor 2	4	883	0.00453001	transforming growth factor beta-1 proprotein	8	2	390.5	0.00512165
glutamate receptor 1	4	906	0.00441501	adenosine receptor A1	10	2	272.667	0.00750826
glutamate receptor 3	4	894	0.00447427	adenosine receptor A2b	1	2	264	0.00780524
glutamate receptor 4	4	902	0.00443459	sodium/potassium-transporting ATPase subunit alpha-1	2	2	1004.4	0.00199169
interleukin-7	4	177	0.0225989	vasopressin V1a receptor	2	2	418	0.00478469
serine/threonine-protein kinase WNK3	4	1743	0.00229489	voltage-dependent L-type calcium channel subunit alpha-1C	2	2	2194.59	0.00091188
fibroblast growth factor receptor-like 1	4	504	0.00793651	cytochrome P450 2F1	24	2	455.9	0.00456818
fibroblast growth factor receptor-like 1	4	504	0.00793651	glutamate receptor ionotropic, NMDA 2D	3	2	1336	0.00149701
uromodulin-like 1	4	1318	0.0030349	metabotropic glutamate receptor 5	24	2	1196	0.00167254
chromodomain-helicase-DNA-binding protein 3	4	2059	0.00194269	cation-independent mannose-6-phosphate receptor	3	2	2491	0.00080289
chromodomain-helicase-DNA-binding protein 3	4	2000	0.002	interleukin-2 receptor subunit beta	5	2	551	0.00362976
WASH complex subunit 2A	4	1341	0.00298285	integrin beta-6	3	2	723	0.00277916
protocadherin Fat 3	4	4557	0.00087777	atrial natriuretic peptide receptor 3	1	2	463.25	0.00468838
DNA excision repair protein ERCC-6-like	4	1127	0.00354925	prostacyclin synthase	4	2	500	0.004
VPS10 domain-containing receptor SorCS1	4	1198	0.0033389	60S ribosomal protein L6	3	2	276.9	0.00737994
Fanconi anemia group D2 protein	4	1451	0.00275672	lanosterol synthase	9	2	709.25	0.00282647
neuron navigator 3	4	2385	0.00167715	calcium-transporting ATPase type 2C member 1	3	2	932.562	0.0021463
AT-hook DNA-binding motif-containing protein 1	4	1603	0.00249532	UTP--glucose-1-phosphate uridylyltransferase	4	2	499.2	0.00400672
sorbin and SH3 domain-containing protein 1	4	1292	0.00309598	high affinity cGMP-specific 3',5'-cyclic phosphodiesterase 9A	2	2	470.76	0.0043443
helicase with zinc finger domain 2	4	2649	0.00151	olfactory receptor 9A2	2	2	310	0.00645161
solute carrier family 2, facilitated glucose transporter member 4	4	509	0.00785855	exosome component 10	2	2	878.333	0.00227755
solute carrier family 26 member 6	4	738	0.00542005	anaphase-promoting complex subunit 11	1	2	196	0.0102041
glutamate receptor 4	4	884	0.00452489	decreased expression in renal and prostate cancer protein	11	2	524	0.00381679
nuclear receptor corepressor 2	4	2458	0.00162734	Fc receptor-like B	19	2	426	0.00469484
cubilin	4	3623	0.00110406	voltage-dependent T-type calcium channel subunit alpha-1I	1	2	1843	0.00111214
laminin subunit alpha-2	4	3118	0.00128287	peregrin	12	2	1218.18	0.00164378
MAX gene-associated protein	4	2856	0.00140056	ras-responsive element-binding protein 1	3	2	1648	0.00121855
RB1-inducible coiled-coil protein 1	4	1591	0.00251414	fibulin-2	2	2	1209.5	0.00165411
glutamate receptor 2	4	883	0.00453001	olfactory receptor 4F4	5	2	305	0.00655738
glutamate receptor 2	4	836	0.00478469	olfactory receptor 10S1	1	2	331	0.0060423
coatomer subunit alpha	4	1233	0.00324412	olfactory receptor 8U1	1	2	309	0.00647249
roquin-2	4	1191	0.00335852	olfactory receptor 8J1	4	2	316	0.00632911
maestro heat-like repeat-containing protein family member 6	4	719	0.00556328	olfactory receptor 9I1	3	2	314	0.00636943
laminin subunit alpha-4	4	1823	0.00219419	olfactory receptor 9G1	22	2	305	0.00655738
laminin subunit alpha-4	4	1816	0.00220264	olfactory receptor 4F17	8	2	305	0.00655738
neuron navigator 2	4	2365	0.00169133	olfactory receptor 4A15	4	2	344	0.00581395
glutamate receptor 1	4	906	0.00441501	olfactory receptor 5AK2	1	2	309	0.00647249
coiled-coil domain-containing protein 17	4	622	0.00643087	olfactory receptor 5H1	6	2	313	0.00638978
laminin subunit alpha-3	4	3277	0.00122063	olfactory receptor 4F5	4	2	326	0.00613497
lipase member M	4	423	0.00945626	olfactory receptor 5H14	1	2	310	0.00645161
inositol hexakisphosphate and diphosphoinositol-pentakisphosphate kinase 1	4	1433	0.00279135	zinc finger protein 473	4	2	867	0.0023069
inositol hexakisphosphate and diphosphoinositol-pentakisphosphate kinase 1	4	1408	0.00284091	complement receptor type 2	22	2	1031.33	0.00194386
protein eyes shut homolog	4	3144	0.00127226	BDNF/NT-3 growth factors receptor	1	2	597.684	0.00363832
SLIT and NTRK-like protein 2	4	845	0.00473373	GATOR complex protein DEPDC5	2	2	1366.86	0.00163534
SLIT and NTRK-like protein 2	4	845	0.00473373	A-kinase anchor protein 14	6	2	141	0.0157409
SLIT and NTRK-like protein 2	4	845	0.00473373	centrosomal protein of 131 kDa	3	2	1067.58	0.00187388
SLIT and NTRK-like protein 2	4	845	0.00473373	basic helix-loop-helix domain-containing protein USF3	5	2	2228	0.000897718
SLIT and NTRK-like protein 2	4	845	0.00473373	uncharacterized protein C1orf167	1	2	1451.93	0.00139625
SLIT and NTRK-like protein 2	4	845	0.00473373	N-alpha-acetyltransferase 30	56	2	362	0.00552486
SLIT and NTRK-like protein 2	4	845	0.00473373	keratin-associated protein 5-10	13	2	202	0.00990099
NHS-like protein 1	4	1606	0.00249066	zinc finger protein with KRAB and SCAN domains 2	8	2	865	0.00234474
protein sidekick-2	4	2172	0.00184162	olfactory receptor 8U9	10	2	309	0.00647249
uncharacterized protein KIAA1671	4	1806	0.00221484	olfactory receptor 9G9	5	2	305	0.00655738
histone-lysine N-methyltransferase SETDB1	4	1291	0.00309837	putative fidgetin-like protein 2	2	2	695.4	0.00289181
otoancorin	4	1060	0.00377358	diacylglycerol kinase kappa	4	2	1256.5	0.00159194
MAX gene-associated protein	4	3065	0.00130506	neurochondrin	1	2	723.333	0.00276532
nebulin	4	8525	0.000469208	purine-rich element-binding protein gamma	3	2	334.5	0.00598743
nebulin	4	8525	0.000469208	DDB1- and CUL4-associated factor 8-like protein 1	7	2	600	0.00333333
glutamate receptor ionotropic, kainate 2	4	892	0.0044843	zinc finger and BTB domain-containing protein 16	3	2	625	0.00325509
protein strawberry notch homolog 1	4	1393	0.0028715	vacuolar protein sorting-associated protein 13A	4	2	3118.25	0.00064149
protocadherin-11 X-linked	4	1339	0.0029873	wiskott-Aldrich syndrome protein family member 1	6	2	559	0.00357782
protocadherin-11 X-linked	4	1310	0.00305344	solute carrier family 2, facilitated glucose transporter member 11	1	2	508.25	0.00393868
protocadherin-11 X-linked	4	1329	0.00300978	zinc finger protein 816	10	2	651	0.0030722
chromodomain-helicase-DNA-binding protein 8	4	2581	0.00154979	serine/threonine-protein kinase Nek10	4	2	1063.52	0.00202542
N(4)-(beta-N-acetylglucosaminyl)-L-asparaginase	4	336	0.0119048	LON peptidase N-terminal domain and RING finger protein 3	16	2	703.8	0.00288455
golgin subfamily A member 3	4	1134	0.00352734	E3 ubiquitin-protein ligase Praja-1	5	2	615.5	0.00325589
coiled-coil domain-containing protein 17	4	613	0.00652529	integral membrane protein GPR155	25	2	866	0.00230977
inositol hexakisphosphate and diphosphoinositol-pentakisphosphate kinase 1	4	1406	0.00284495	transcription termination factor 2, mitochondrial	1	2	385	0.00519481
nuclear receptor corepressor 1	4	2337	0.0017116	protein unc-45 homolog B	3	2	897.8	0.00223196
uromodulin-like 1	4	1374	0.00291121	acyl-coenzyme A thioesterase 9, mitochondrial	11	2	422	0.00476571
uromodulin-like 1	4	1246	0.00321027	protein PTHB1	1	2	819.208	0.00246935
interleukin-7	4	133	0.0300752	zinc finger protein 404	4	2	552	0.00362319
interleukin-7	4	159	0.0251572	protein Niban 2	2	2	756.5	0.00264521
interleukin-7	4	115	0.0347826	endothelin-converting enzyme 2	5	2	770.667	0.00259929
BIVM-ERCC5 protein	4	1640	0.00243902	phytanoyl-CoA dioxygenase, peroxisomal	6	2	274	0.00748993
VPS10 domain-containing receptor SorCS1	4	1179	0.00339271	macrophage-expressed gene 1 protein	11	2	716	0.0027933
VPS10 domain-containing receptor SorCS1	4	1130	0.00353982	dnaJ homolog subfamily B member 2	4	2	300.5	0.00669653
VPS10 domain-containing receptor SorCS1	4	1159	0.00345125	angiopoietin-related protein 4	4	2	396	0.0050648
VPS10 domain-containing receptor SorCS1	4	1179	0.00339271	cerebellin-3	1	2	205	0.0097561
nuclear receptor corepressor 2	4	2504	0.00159744	ankyrin repeat domain-containing protein 34A	1	2	496	0.00403226
neuron navigator 2	4	2488	0.00160772	mucin-17	1	2	4493	0.000445137
glutamate receptor 1	4	826	0.00484262	terminal nucleotidyltransferase 4B	1	2	663.25	0.00304052
glutamate receptor 1	4	811	0.00493218	coiled-coil domain-containing protein 112	1	2	513	0.00390243
glutamate receptor 1	4	916	0.00436681	myotubularin-related protein 12	1	2	692.333	0.00290103
glutamate receptor 1	4	916	0.00436681	endoplasmic reticulum aminopeptidase 1	1	2	922.357	0.00220235
glutamate receptor 1	4	837	0.00477897	transmembrane protein 80	1	2	194.8	0.011208
disheveled-associated activator of morphogenesis 1	4	1068	0.00374532	sodium/hydrogen exchanger 6	1	2	653.222	0.00306642
hydrocephalus-inducing protein homolog	4	5121	0.000781097	cohesin subunit SA-2	1	2	1245.57	0.00160625
nebulin	4	8560	0.00046729	somatostatin receptor type 2	1	2	369	0.00542005
thyroid adenoma-associated protein	4	937	0.00426894	serotransferrin	1	2	641	0.00314202
thyroid adenoma-associated protein	4	894	0.00447427	DNA topoisomerase 2-beta	79	2	1612	0.00124082
slit homolog 3 protein	4	1530	0.00261438	mitotic-spindle organizing protein 1	3	2	82	0.0243902
dynein heavy chain 11, axonemal	4	4516	0.00088574	interferon regulatory factor 2-binding protein 2	3	2	579	0.00345489
SKI family transcriptional corepressor 2	4	1015	0.00394089	arf-GAP with GTPase, ANK repeat and PH domain-containing protein 6	38	2	585.5	0.00351958
protein MON2 homolog	4	1645	0.00243161	dapper homolog 1	22	2	817.5	0.00244774
elastin	4	658	0.00607903	cullin-4B	3	2	856.25	0.00235921
solute carrier family 26 member 6	4	723	0.0055325	DNA repair-scaffolding protein	12	2	848.083	0.00237947
solute carrier family 26 member 6	4	651	0.00614439	serine/threonine-protein kinase LMTK1	6	2	1322.5	0.00151458
FH1/FH2 domain-containing protein 3	4	1422	0.00281294	protein unc-13 homolog A	19	2	1694.5	0.00118032
signal-induced proliferation-associated 1-like protein 1	4	1783	0.00224341	lysine-specific demethylase 6B	14	2	1677.67	0.0011922
signal-induced proliferation-associated 1-like protein 1	4	1782	0.00224467	zinc finger protein 697	1	2	545	0.00366972
signal-induced proliferation-associated 1-like protein 1	4	1803	0.00221852	uncharacterized protein C2orf78	5	2	922	0.0021692
anillin	4	1087	0.00367985	rho guanine nucleotide exchange factor 28	1	2	1578.12	0.00128347
anillin	4	1086	0.00368324	apical junction component 1 homolog	2	2	976	0.00204918
centrosomal protein of 162 kDa	4	1327	0.00301432	coiled-coil and C2 domain-containing protein 2A	1	2	1603.67	0.0012474
general transcription factor 3C polypeptide 1	4	2084	0.00191939	WAS/WASL-interacting protein family member 3	1	2	477.5	0.00418904
protein FAM214A	4	1083	0.00369344	cactin	5	2	595.75	0.00363028
anaphase-promoting complex subunit 4	4	809	0.00494438	nuclear RNA export factor 1	2	2	487.5	0.0044245
1-phosphatidylinositol 4,5-bisphosphate phosphodiesterase epsilon-1	4	2286	0.00174978	multifunctional procollagen lysine hydroxylase and glycosyltransferase LH3	3	2	738	0.00271003
filamin-A-interacting protein 1	4	1216	0.00328947	striatin-3	9	2	755	0.00265318
dedicator of cytokinesis protein 10	4	2180	0.00183486	colorectal mutant cancer protein	4	2	859.222	0.00235301
sorbin and SH3 domain-containing protein 1	4	1266	0.00315956	ATP-binding cassette sub-family A member 3	11	2	1704	0.00117371
catenin alpha-1	4	841	0.00475624	amiloride-sensitive amine oxidase [copper-containing]	3	2	763.667	0.00261931
dmX-like protein 1	4	3048	0.00131234	solute carrier family 35 member G2	1	2	412	0.00485437
hemicentin-2	4	5079	0.000787557	probable ATP-dependent RNA helicase DDX17	8	2	730	0.00273973
protein eyes shut homolog	4	3165	0.00126382	patatin-like phospholipase domain-containing protein 7	4	2	1252.83	0.00163059
histone-lysine N-methyltransferase SETD5	4	1344	0.00297619	protein C1orf43	32	2	206.8	0.00993942
WASH complex subunit 4	4	1174	0.00340716	seizure protein 6 homolog	4	2	978.6	0.00205326
mitogen-activated protein kinase kinase kinase 6	4	1280	0.003125	cyclin-K	4	2	580	0.00344828
filamin-A-interacting protein 1	4	1177	0.00339847	cap-specific mRNA (nucleoside-2'-O-)-methyltransferase 2	3	2	770	0.0025974
transcription factor-like 5 protein	4	461	0.00867679	leucine-rich repeat-containing protein 58	4	2	371	0.00539084
solute carrier family 22 member 5	4	581	0.00688468	protein strawberry notch homolog 2	2	2	1298.67	0.00154334
matrilin-2	4	915	0.00437158	protein FAM184A	21	2	1015.67	0.00198362
nuclear receptor coactivator 6	4	2063	0.00193892	alpha-actinin-3	5	2	922.5	0.0021692
unconventional myosin-XVIIIb	4	2568	0.00155763	protein FAM166C	4	2	204.333	0.00978924
A disintegrin and metalloproteinase with thrombospondin motifs 9	4	1907	0.00209754	coiled-coil domain-containing protein 178	7	2	830.5	0.00242354
neuronal PAS domain-containing protein 4	4	592	0.00675676	gamma-aminobutyric acid receptor subunit rho-3	6	2	467	0.00428266
Fanconi anemia group D2 protein	4	1451	0.00275672	peroxisomal coenzyme A diphosphatase NUDT7	6	2	204	0.00998687
palmitoyltransferase ZDHHC23	4	435	0.0091954	disintegrin and metalloproteinase domain-containing protein 10	5	2	713	0.00281019
palmitoyltransferase ZDHHC23	4	435	0.0091954	uncharacterized protein C16orf92	3	2	126.4	0.0161987
palmitoyltransferase ZDHHC23	4	432	0.00925926	receptor-type tyrosine-protein phosphatase beta	24	2	1998.11	0.00101667
thyroid receptor-interacting protein 11	4	1978	0.00202224	zinc finger protein 57 homolog	1	2	536	0.00373134
Hermansky-Pudlak syndrome 1 protein	4	700	0.00571429	ventral anterior homeobox 1	4	2	334	0.00598802
Hermansky-Pudlak syndrome 1 protein	4	700	0.00571429	bromodomain-containing protein 2	97	2	774.6	0.0025951
Hermansky-Pudlak syndrome 1 protein	4	613	0.00652529	adenylate cyclase type 9	3	2	1242	0.00164464
Hermansky-Pudlak syndrome 1 protein	4	613	0.00652529	E3 ubiquitin-protein ligase RNF180	6	2	571.8	0.00356159
Hermansky-Pudlak syndrome 1 protein	4	577	0.00693241	polyadenylate-binding protein 4-like	7	2	370	0.00540541
Hermansky-Pudlak syndrome 1 protein	4	577	0.00693241	tissue-resident T-cell transcription regulator protein ZNF683	1	2	506.143	0.00398642
pleckstrin homology domain-containing family A member 7	4	1271	0.00314713	perilipin-2	17	2	441	0.00453552
pleckstrin homology domain-containing family A member 7	4	1122	0.00356506	atypical chemokine receptor 1	2	2	337	0.00593477
WASH complex subunit 2C	4	1341	0.00298285	E3 ubiquitin-protein ligase LNX	4	2	712	0.0028168
protein phosphatase 1 regulatory subunit 12B	4	1043	0.00383509	gasdermin-E	20	2	496	0.00403226
RNA polymerase-associated protein CTR9 homolog	4	1149	0.00348129	filamin-C	6	2	2708.5	0.000738444
baculoviral IAP repeat-containing protein 1	4	1403	0.00285103	sal-like protein 1	1	2	1275.5	0.00157028
dmX-like protein 1	4	3048	0.00131234	zinc finger E-box-binding homeobox 1	1	2	951.432	0.00211576
histone-lysine N-methyltransferase SETD5	4	1344	0.00297619	rho guanine nucleotide exchange factor 3	1	2	508.778	0.00396812
protein TANC1	4	1660	0.00240964	tRNA modification GTPase GTPBP3, mitochondrial	8	2	500.25	0.00400479
dyslexia-associated protein KIAA0319	4	920	0.00434783	ectonucleoside triphosphate diphosphohydrolase 4	2	2	612	0.00326811
dyslexia-associated protein KIAA0319	4	920	0.00434783	spectrin alpha chain, non-erythrocytic 1	3	2	2479.05	0.000806797
protein AHNAK2	4	5695	0.000702371	striatin-interacting protein 2	14	2	680.714	0.00299374
pleckstrin homology domain-containing family G member 2	4	1237	0.00323363	palmitoyltransferase ZDHHC4	5	2	340.786	0.00587351
signal-induced proliferation-associated 1-like protein 1	4	1804	0.00221729	leucine-rich repeat transmembrane neuronal protein 4	45	2	561.6	0.00357566
signal-induced proliferation-associated 1-like protein 1	4	1782	0.00224467	solute carrier family 12 member 5	9	2	1127.5	0.00177402
signal-induced proliferation-associated 1-like protein 1	4	1782	0.00224467	retrotransposon-like protein 1	21	2	1358	0.00147275
signal-induced proliferation-associated 1-like protein 1	4	1782	0.00224467	leucine-rich repeat-containing protein 15	10	2	584	0.00342475
inositol hexakisphosphate and diphosphoinositol-pentakisphosphate kinase 1	4	1429	0.00279916	receptor-type tyrosine-protein phosphatase kappa	1	2	1333.19	0.00157799
inositol hexakisphosphate and diphosphoinositol-pentakisphosphate kinase 1	4	1429	0.00279916	Nance-Horan syndrome protein	3	2	1508.6	0.00133396
inositol hexakisphosphate and diphosphoinositol-pentakisphosphate kinase 1	4	1429	0.00279916	zinc finger MYND domain-containing protein 15	3	2	688.25	0.00294782
inositol hexakisphosphate and diphosphoinositol-pentakisphosphate kinase 1	4	1429	0.00279916	leishmanolysin-like peptidase	1	2	673.5	0.0029718
inositol hexakisphosphate and diphosphoinositol-pentakisphosphate kinase 1	4	1429	0.00279916	minichromosome maintenance domain-containing protein 2	3	2	588.833	0.00350288
inositol hexakisphosphate and diphosphoinositol-pentakisphosphate kinase 1	4	1421	0.00281492	synaptotagmin-2	2	2	434.75	0.00461436
inositol hexakisphosphate and diphosphoinositol-pentakisphosphate kinase 1	4	1421	0.00281492	zinc finger protein 732	2	2	585	0.0034188
inositol hexakisphosphate and diphosphoinositol-pentakisphosphate kinase 1	4	1421	0.00281492	anaphase-promoting complex subunit 7	2	2	537	0.00372439
inositol hexakisphosphate and diphosphoinositol-pentakisphosphate kinase 1	4	1408	0.00284091	protein FAM205A	7	2	1335	0.00149813
inositol hexakisphosphate and diphosphoinositol-pentakisphosphate kinase 1	4	1408	0.00284091	structural maintenance of chromosomes protein 6	6	2	1093.75	0.00182892
inositol hexakisphosphate and diphosphoinositol-pentakisphosphate kinase 1	4	1408	0.00284091	sequestosome-1	4	2	384	0.00526047
inositol hexakisphosphate and diphosphoinositol-pentakisphosphate kinase 1	4	1400	0.00285714	protein spinster homolog 1	12	2	503.889	0.00402383
inositol hexakisphosphate and diphosphoinositol-pentakisphosphate kinase 1	4	1380	0.00289855	protein transport protein Sec61 subunit alpha	2	2	460.75	0.00434633
inositol hexakisphosphate and diphosphoinositol-pentakisphosphate kinase 1	4	1366	0.00292826	interleukin-11 receptor subunit alpha	4	2	422	0.00473934
inositol hexakisphosphate and diphosphoinositol-pentakisphosphate kinase 1	4	1366	0.00292826	angiopoietin-1	6	2	431	0.00491721
inositol hexakisphosphate and diphosphoinositol-pentakisphosphate kinase 1	4	1366	0.00292826	zinc finger BED domain-containing protein 5	9	2	693	0.002886
roquin-2	4	1129	0.00354296	serine/threonine-protein kinase Sgk1	3	2	462.333	0.00437743
roquin-2	4	1153	0.00346921	DIS3-like exonuclease 1	2	2	954.5	0.00210223
dedicator of cytokinesis protein 10	4	2199	0.00181901	tyrosine-protein kinase Fes/Fps	8	2	763.833	0.00262607
palmitoyltransferase ZDHHC23	4	412	0.00970874	coiled-coil domain-containing protein 68	1	2	312.909	0.00647713
glutamate receptor 1	4	915	0.00437158	solute carrier family 13 member 5	3	2	532.8	0.00376158
glutamate receptor 1	4	837	0.00477897	cGMP-dependent 3',5'-cyclic phosphodiesterase	2	2	933.4	0.00214284
nuclear pore complex protein Nup98-Nup96	4	1831	0.0021846	protein unc-93 homolog A	14	2	449.714	0.0044522
nuclear pore complex protein Nup98-Nup96	4	1792	0.00223214	transducin-like enhancer protein 6	4	2	488.875	0.00416493
nuclear pore complex protein Nup98-Nup96	4	1783	0.00224341	arf-GAP with GTPase, ANK repeat and PH domain-containing protein 5	20	2	686	0.00291545
nuclear pore complex protein Nup98-Nup96	4	1753	0.0022818	RNA cytidine acetyltransferase	8	2	989	0.00202493
putative short-chain dehydrogenase/reductase family 42E member 2	4	626	0.00638978	protein SCAI	2	2	617.5	0.00323999
histone-lysine N-methyltransferase, H3 lysine-36 specific	4	2427	0.00164813	cbp/p300-interacting transactivator 1	1	2	203.4	0.00987058
maltase-glucoamylase, intestinal	4	2753	0.00145296	uncharacterized protein C2orf72	11	2	295	0.00677966
dynein heavy chain 12, axonemal	4	3960	0.0010101	serine/threonine-protein kinase Nek6	68	2	325.083	0.00616491
histone-lysine N-methyltransferase SETDB1	4	1292	0.00309598	uncharacterized protein C16orf96	4	2	1122.25	0.00178286
histone-lysine N-methyltransferase SETDB1	4	1292	0.00309598	conserved oligomeric Golgi complex subunit 2	9	2	737.5	0.00271187
WASH complex subunit 2C	4	1362	0.00293686	solute carrier organic anion transporter family member 3A1	1	2	669.2	0.00300107
WASH complex subunit 2C	4	1266	0.00315956	RRP12-like protein	6	2	1233.67	0.00163969
WASH complex subunit 2C	4	1265	0.00316206	E3 ubiquitin-protein ligase makorin-1	8	2	416.667	0.00492807
WASH complex subunit 2C	4	1317	0.00303721	corticotropin-releasing factor receptor 1	16	2	364.833	0.00572457
WASH complex subunit 2C	4	1288	0.00310559	properdin	2	2	469	0.00426439
WASH complex subunit 2C	4	1254	0.00318979	tyrosine-protein phosphatase non-receptor type 3	6	2	810.706	0.00251101
protocadherin Fat 3	4	4589	0.00087165	lipoxygenase homology domain-containing protein 1	5	2	1218.21	0.00205432
doublecortin domain-containing protein 1	4	1783	0.00224341	histone-lysine N-methyltransferase EHMT1	5	2	1110.3	0.00193389
receptor-type tyrosine-protein phosphatase zeta	4	2308	0.0017331	ankyrin-2	10	2	4005.07	0.000504803
receptor-type tyrosine-protein phosphatase zeta	4	2301	0.00173837	ras-specific guanine nucleotide-releasing factor 1	18	2	1168.6	0.00185665
arf-GAP with Rho-GAP domain, ANK repeat and PH domain-containing protein 1	4	1194	0.00335008	cancer/testis antigen 47B	3	2	298.5	0.00670019
homeodomain-interacting protein kinase 1	4	1210	0.00330579	cell division cycle protein 20 homolog B	3	2	431	0.0053299
homeodomain-interacting protein kinase 1	4	1209	0.00330852	transketolase-like protein 1	9	2	575.333	0.00348308
WD repeat- and FYVE domain-containing protein 4	4	1614	0.00247831	semaphorin-7A	3	2	606.333	0.00335417
fibroblast growth factor receptor-like 1	4	504	0.00793651	tudor domain-containing protein 3	1	2	765.667	0.00261618
protein unc-13 homolog B	4	1990	0.00201005	RNA polymerase II-associated protein 3	59	2	600.667	0.00337655
protein unc-13 homolog B	4	4340	0.000921659	protein mono-ADP-ribosyltransferase PARP9	3	2	817.182	0.00245443
AT-hook DNA-binding motif-containing protein 1	4	1603	0.00249532	NK1 transcription factor-related protein 2	9	2	310	0.00645161
dynein heavy chain 6, axonemal	4	4158	0.000962001	transmembrane protein 88B	3	2	163	0.0122699
Fanconi anemia group D2 protein	4	1414	0.00282885	lysine-specific demethylase 4C	2	2	844.412	0.00245066
Fanconi anemia group D2 protein	4	1458	0.00274348	annexin A11	38	2	519.1	0.00386855
dystonin	4	7794	0.000513215	polyamine deacetylase HDAC10	15	2	659	0.0030356
dystonin	4	7803	0.000512623	BUD13 homolog	3	2	563.333	0.00358923
dystonin	4	7818	0.00051164	pannexin-2	8	2	660	0.00303231
multiple PDZ domain protein	4	1934	0.00206825	transmembrane channel-like protein 7	1	2	691.25	0.00291201
ATP-binding cassette sub-family A member 10	4	1543	0.00259235	ADP-ribosylation factor-like protein 13A	4	2	216.333	0.00993284
glutamate receptor 2	4	836	0.00478469	lysophosphatidic acid receptor 6	3	2	344	0.00581395
glutamate receptor 2	4	836	0.00478469	HIV Tat-specific factor 1	5	2	755	0.00264901
neurobeachin	4	2964	0.00134953	carboxypeptidase A4	9	2	404.5	0.00495262
glutamyl aminopeptidase	4	941	0.0042508	filamin-B	1	2	2601	0.000768982
sorbin and SH3 domain-containing protein 1	4	1304	0.00306748	eukaryotic translation initiation factor 4E transporter	3	2	977.091	0.00205439
sorbin and SH3 domain-containing protein 1	4	1326	0.00301659	UPF0606 protein KIAA1549	1	2	1935.67	0.00103327
sorbin and SH3 domain-containing protein 1	4	1326	0.00301659	apoptotic chromatin condensation inducer in the nucleus	5	2	1145.38	0.00183424
dipeptidyl peptidase 9	4	812	0.00492611	secretogranin-3	3	2	352	0.00637404
ciliogenesis and planar polarity effector 1	4	3251	0.00123039	dystroglycan	10	2	895	0.00223464
neurobeachin	4	2967	0.00134816	sodium-dependent phosphate transport protein 2A	5	2	485.8	0.00446726
protein FAM214A	4	1076	0.00371747	neuron navigator 1	19	2	1680	0.00120707
protein FAM214A	4	1076	0.00371747	C2 calcium-dependent domain-containing protein 6	4	2	1547.5	0.00133376
protein FAM214A	4	1076	0.00371747	GRB2-associated and regulator of MAPK protein 2	2	2	766.714	0.0026616
protein FAM214A	4	1076	0.00371747	C-X-C chemokine receptor type 2	14	2	360	0.00555556
protein FAM214A	4	1076	0.00371747	cullin-7	2	2	1691.53	0.00120693
protein FAM214A	4	1076	0.00371747	signal peptide, CUB and EGF-like domain-containing protein 2	2	2	917.714	0.00220124
protein FAM214A	4	1083	0.00369344	protein phosphatase 1 regulatory subunit 32	12	2	415	0.00482208
protein FAM214A	4	1060	0.00377358	immunoglobulin superfamily member 1	6	2	1029.5	0.0032308
protein FAM214A	4	1013	0.00394867	calmodulin-binding transcription activator 2	6	2	1194.27	0.00167935
protein FAM214A	4	988	0.00404858	zinc finger E-box-binding homeobox 2	14	2	1202	0.00166406
protein FAM214A	4	988	0.00404858	TPA-induced transmembrane protein	9	2	250	0.008
microtubule-associated protein 4	4	2219	0.00180261	cadherin-23	3	2	1849	0.00141507
microtubule-associated protein 4	4	2296	0.00174216	DNA-binding protein SATB2	2	2	683.25	0.00294959
microtubule-associated protein 4	4	2296	0.00174216	peroxisome proliferator-activated receptor gamma coactivator 1-beta	4	2	989.875	0.00203244
microtubule-associated protein 4	4	2219	0.00180261	NACHT, LRR and PYD domains-containing protein 2	2	2	1052.4	0.00190061
microtubule-associated protein 4	4	2258	0.00177148	dmX-like protein 2	44	2	2693.85	0.000764423
general transcription factor 3C polypeptide 1	4	2109	0.00189663	sodium-dependent phosphate transport protein 2C	4	2	613.909	0.00325914
DNA damage-binding protein 1	4	1140	0.00350877	CDK-activating kinase assembly factor MAT1	18	2	291.4	0.00688652
laminin subunit alpha-4	4	1816	0.00220264	sodium channel protein type 8 subunit alpha	20	2	1959.5	0.00102078
laminin subunit beta-2	4	1798	0.00222469	cell division control protein 45 homolog	4	2	513	0.00402121
matrilin-2	4	956	0.0041841	hydroxyacyl-coenzyme A dehydrogenase, mitochondrial	2	2	322.5	0.00620586
mucin-2	4	5289	0.000756287	zinc finger protein 408	9	2	716	0.00279338
protein phosphatase 1 regulatory subunit 12B	4	982	0.00407332	BEN domain-containing protein 2	8	2	755.6	0.00266493
receptor-type tyrosine-protein phosphatase zeta	4	2315	0.00172786	NADPH oxidase 5	19	2	744	0.00268927
solute carrier family 22 member 5	4	557	0.00718133	serine/threonine-protein kinase ATR	47	2	2613	0.000765519
slit homolog 3 protein	4	1523	0.0026264	microprocessor complex subunit DGCR8	7	2	643	0.00336591
nuclear receptor-interacting protein 1	4	1158	0.00345423	dedicator of cytokinesis protein 8	14	2	1983.8	0.00101648
ras GTPase-activating-like protein IQGAP1	4	1657	0.002414	collagen alpha-1(XI) chain	3	2	1769.67	0.00113578
myomesin-2	4	1465	0.00273038	serine/threonine-protein kinase PLK4	3	2	946.833	0.00211298
thyroid receptor-interacting protein 11	4	1979	0.00202122	nuclear pore glycoprotein p62	5	2	522	0.00383142
coatomer subunit alpha	4	1224	0.00326797	telomerase reverse transcriptase	2	2	1100.5	0.00181885
versican core protein	4	3396	0.00117786	protein O-mannosyl-transferase TMTC1	1	2	845	0.00239637
low-density lipoprotein receptor-related protein 2	4	4655	0.000859291	7SK snRNA methylphosphate capping enzyme	2	2	313.8	0.00785328
baculoviral IAP repeat-containing protein 1	4	1403	0.00285103	L-xylulose reductase	12	2	243	0.00823059
nebulin	4	6669	0.00059979	chondroitin sulfate synthase 2	16	2	624	0.00332517
maltase-glucoamylase, intestinal	4	1857	0.00215401	cilia- and flagella-associated protein 57	3	2	1217.46	0.00164731
mitogen-activated protein kinase kinase kinase 6	4	1288	0.00310559	ras and Rab interactor-like protein	36	2	526.857	0.00383842
disks large homolog 5	4	1919	0.00208442	pleckstrin homology domain-containing family A member 8	5	2	466.9	0.00429573
symplekin	4	1274	0.00313972	aryl hydrocarbon receptor nuclear translocator	2	2	768.958	0.00260231
protocadherin Fat 1	4	4588	0.00087184	potassium/sodium hyperpolarization-activated cyclic nucleotide-gated channel 2	4	2	889	0.00224972
nucleolin	4	710	0.0056338	adenylate cyclase type 4	2	2	1077	0.00185701
laminin subunit gamma-2	4	1193	0.00335289	eukaryotic translation initiation factor 4 gamma 3	12	2	1540.41	0.00139106
chromodomain-helicase-DNA-binding protein 3	4	1966	0.00203459	ATP5J2-PTCD1 fusion protein	8	2	749	0.00267023
bone morphogenetic protein 1	4	986	0.0040568	YY1-associated protein 1	1	2	766.636	0.00262289
talin-1	4	2541	0.00157418	uncharacterized protein KIAA1522	1	2	1019.75	0.00197124
nuclear receptor corepressor 2	4	2514	0.00159109	myelin-associated glycoprotein	13	2	603	0.0033197
transcription factor-like 5 protein	4	500	0.008	testis-expressed protein 48	1	2	119.5	0.0167367
glutamate receptor 3	4	894	0.00447427	CCR4-NOT transcription complex subunit 2	8	2	489.5	0.00415855
histone-lysine N-methyltransferase SETDB1	4	1290	0.00310078	fucose-1-phosphate guanylyltransferase	3	2	467	0.00462468
splicing factor 3B subunit 1	4	1304	0.00306748	serine/threonine-protein kinase Nek1	9	2	1149.18	0.00176618
anaphase-promoting complex subunit 4	4	808	0.0049505	solute carrier family 28 member 3	5	2	651	0.00313759
nuclear receptor coactivator 6	4	2063	0.00193892	integrator complex subunit 7	2	2	880.833	0.00238964
sodium-dependent proline transporter	4	636	0.00628931	protein dopey-1	4	2	2449.47	0.00081679
midasin	4	5596	0.000714796	cilia- and flagella-associated protein 46	1	2	2715	0.000736648
RNA polymerase-associated protein CTR9 homolog	4	1173	0.00341006	oxysterol-binding protein-related protein 6	3	2	897.476	0.00223751
inositol hexakisphosphate and diphosphoinositol-pentakisphosphate kinase 1	4	1408	0.00284091	pleiotropic regulator 1	2	2	509.5	0.00392572
dedicator of cytokinesis protein 10	4	2186	0.00182983	corticotropin-releasing factor receptor 2	6	2	407.286	0.00491716
RB1-inducible coiled-coil protein 1	4	1594	0.00250941	Homeobox protein cut-like 1	12	2	1516.43	0.00132083
pecanex-like protein 2	4	2137	0.00187178	interleukin-17 receptor C	12	2	734.438	0.00273109
centrosomal protein of 162 kDa	4	1403	0.00285103	RNA-binding protein 10	11	2	886.211	0.0022949
neuron navigator 3	4	2363	0.00169276	occludin	17	2	450.2	0.00471798
disheveled-associated activator of morphogenesis 1	4	1078	0.00371058	transcription termination factor 1	5	2	733.333	0.0031827
E3 ubiquitin-protein ligase MYCBP2	4	4678	0.000855066	junctional adhesion molecule C	5	2	284.5	0.00708681
serine/threonine-protein kinase SMG1	4	3661	0.0010926	zinc finger protein 233	7	2	419.25	0.00808946
arf-GAP with Rho-GAP domain, ANK repeat and PH domain-containing protein 1	4	1205	0.0033195	coxsackievirus and adenovirus receptor	8	2	355	0.00563613
WASH complex subunit 4	4	1173	0.00341006	basic leucine zipper and W2 domain-containing protein 1	1	2	394	0.00513035
little elongation complex subunit 1	4	2266	0.00176523	bone morphogenetic protein receptor type-1B	2	2	505.333	0.0039591
E3 ubiquitin-protein ligase HECTD1	4	2610	0.00153257	bone morphogenetic protein receptor type-2	2	2	1037.5	0.00192771
RNA polymerase II-associated protein 1	4	1393	0.0028715	mitotic checkpoint serine/threonine-protein kinase BUB1 beta	5	2	1050	0.00190476
signal-induced proliferation-associated 1-like protein 1	4	1804	0.00221729	caspase-6	7	2	248.5	0.00831493
neurobeachin	4	2946	0.00135777	cyclin-A2	1	2	432	0.00462963
filamin-A-interacting protein 1	4	1213	0.00329761	ran-binding protein 6	12	2	850.333	0.00245067
BRD4-interacting chromatin-remodeling complex-associated protein	4	1560	0.0025641	DENN domain-containing protein 5A	4	2	1245.5	0.0016071
nuclear pore complex protein Nup98-Nup96	4	1800	0.00222222	H(+)/Cl(-) exchange transporter 3	2	2	822.667	0.00243365
1-phosphatidylinositol 4,5-bisphosphate phosphodiesterase epsilon-1	4	2302	0.00173762	protein O-linked-mannose beta-1,2-N-acetylglucosaminyltransferase 1	5	2	671.667	0.00301303
homeobox protein SIX4	4	781	0.00512164	TSC22 domain family protein 1	6	2	962.833	0.00218684
stabilin-2	4	2551	0.00156801	protein TALPID3	3	2	1508.33	0.00132878
DNA excision repair protein ERCC-6-like	4	1250	0.0032	rho guanine nucleotide exchange factor 26	6	2	776.2	0.00268875
PH-interacting protein	4	1821	0.0021966	cingulin-like protein 1	2	2	1302.62	0.00153536
protein strawberry notch homolog 1	4	1392	0.00287356	exportin-2	13	2	943.667	0.00212064
4'-phosphopantetheine phosphatase	4	773	0.00517464	armadillo repeat-containing X-linked protein 4	17	2	2290	0.000873362
anillin	4	1124	0.00355872	ankyrin repeat domain-containing protein 11	19	2	2645.71	0.000756023
laminin subunit gamma-2	4	1111	0.00360036	CRHR1-IT1-CRHR1 protein	23	2	240	0.00833333
protein FAM214A	4	1076	0.00371747	dystrobrevin beta	14	2	528.404	0.00390592
manganese-transporting ATPase 13A1	4	1204	0.00332226	glycerol-3-phosphate acyltransferase 3	10	2	424.857	0.00478163
reticulon-4	4	1192	0.0033557	stonin-2	2	2	954	0.00209837
caskin-1	4	1431	0.00279525	alpha-mannosidase 2C1	4	2	1013.75	0.0019768
doublecortin domain-containing protein 1	4	890	0.00449438	gamma-aminobutyric acid receptor subunit rho-1	4	2	423.4	0.0047621
serine/threonine-protein kinase WNK3	4	1800	0.00222222	KN motif and ankyrin repeat domain-containing protein 1	3	2	1261.21	0.00159409
carbohydrate sulfotransferase 6	4	395	0.0101266	ATP-dependent DNA helicase DDX11	3	2	941.636	0.00216123
fibroblast growth factor receptor-like 1	4	504	0.00793651	protein ITPRID1	3	2	1029.57	0.00194453
glutamate receptor ionotropic, kainate 2	4	908	0.00440529	histone demethylase UTY	3	2	1332.42	0.00151864
histone-lysine N-methyltransferase, H3 lysine-36 specific	4	2696	0.00148368	anion exchange protein 4	11	2	966.111	0.00207562
anaphase-promoting complex subunit 1	4	1944	0.00205761	lipolysis-stimulated lipoprotein receptor	8	2	571.25	0.00352436
pleckstrin homology domain-containing family G member 2	4	1386	0.002886	transcription factor SOX-5	1	2	725.39	0.00281485
baculoviral IAP repeat-containing protein 1	4	1241	0.00322321	peripheral-type benzodiazepine receptor-associated protein 1	1	2	1852.5	0.00107963
solute carrier family 26 member 6	4	759	0.00527009	tight junction protein ZO-3	17	2	923.5	0.00216573
ciliogenesis and planar polarity effector 1	4	3197	0.00125117	coiled-coil domain-containing protein 61	10	2	514	0.00389123
transport and Golgi organization protein 6 homolog	4	1094	0.00365631	circadian locomoter output cycles protein kaput	2	2	839.444	0.00238376
multimerin-2	4	949	0.00421496	chromatin modification-related protein MEAF6	10	2	194.667	0.0102794
phosphatidylinositol 3,4,5-trisphosphate-dependent Rac exchanger 2 protein	4	1606	0.00249066	cilia- and flagella-associated protein 221	3	2	787	0.00258923
dedicator of cytokinesis protein 5	4	1870	0.00213904	vacuolar protein sorting-associated protein 72 homolog	18	2	327.333	0.00635276
A disintegrin and metalloproteinase with thrombospondin motifs 20	4	1910	0.00209424	ankyrin repeat domain-containing protein 61	22	2	418	0.00478469
FH1/FH2 domain-containing protein 3	4	1439	0.00277971	calcitonin gene-related peptide type 1 receptor	2	2	464.667	0.00430469
SLIT and NTRK-like protein 2	4	845	0.00473373	AP-3 complex subunit beta-1	4	2	1013.4	0.00198592
ubiquitin carboxyl-terminal hydrolase 32	4	1604	0.00249377	G-protein coupled receptor 176	5	2	491.333	0.00407537
unconventional myosin-XVIIIb	4	2567	0.00155824	proton channel OTOP3	3	2	580.333	0.00344775
hepatitis A virus cellular receptor 2	4	301	0.013289	von Willebrand factor A domain-containing protein 2	6	2	715.286	0.00289119
protocadherin-11 X-linked	4	1347	0.00296956	inositol hexakisphosphate and diphosphoinositol-pentakisphosphate kinase 2	3	2	1188.38	0.00168682
protocadherin-11 X-linked	4	1337	0.00299177	arf-GAP with GTPase, ANK repeat and PH domain-containing protein 4	2	2	642.333	0.00313075
protocadherin-11 Y-linked	4	1340	0.00298507	leucine-rich repeat-containing protein 31	16	2	473.714	0.00430311
Fanconi anemia group D2 protein	4	1471	0.00271924	disintegrin and metalloproteinase domain-containing protein 2	5	2	669.333	0.00301096
helicase with zinc finger domain 2	4	2080	0.00192308	solute carrier family 43 member 3	4	2	493.6	0.00405231
protein dispatched homolog 2	4	1401	0.0028551	nuclear pore complex protein Nup153	11	2	1506	0.00132802
coiled-coil domain-containing protein 97	4	343	0.0116618	LIM and cysteine-rich domains protein 1	3	2	303.333	0.00674464
ATP-binding cassette sub-family A member 10	4	1543	0.00259235	NEDD4-binding protein 2-like 2	8	2	818.8	0.00260433
titin	4	5604	0.000713776	AP-3 complex subunit beta-2	2	2	1077.67	0.00185657
solute carrier family 26 member 6	4	758	0.00527704	kinesin-like protein KIF23	13	2	871.417	0.00230824
solute carrier family 26 member 6	4	740	0.00540541	RCC1-like G exchanging factor-like protein	27	2	401.75	0.00508613
protein AHNAK2	4	5795	0.00069025	UBX domain-containing protein 8	11	2	275.333	0.00741908
nuclear pore complex protein Nup98-Nup96	4	1726	0.0023175	protein phosphatase 1 regulatory subunit 7	5	2	294	0.00697549
kinetochore scaffold 1	4	2316	0.00172712	cGMP-dependent protein kinase 2	2	2	728.889	0.00281415
otoancorin	4	1139	0.00351185	golgin subfamily A member 8K	2	2	630	0.0031746
neuron navigator 2	4	2429	0.00164677	cohesin subunit SA-3	7	2	1220.4	0.00163948
xin actin-binding repeat-containing protein 2	4	3549	0.00112708	GON-4-like protein	6	2	2003.91	0.00102829
coiled-coil domain-containing protein 27	4	656	0.00609756	rab effector MyRIP	15	2	802.167	0.00251289
homeodomain-interacting protein kinase 1	4	1075	0.00372093	ras GTPase-activating-like protein IQGAP2	16	2	1547.83	0.00129238
kinesin-like protein KIF19	4	998	0.00400802	DBF4-type zinc finger-containing protein 2	14	2	2323.25	0.000862707
very large A-kinase anchor protein	4	2970	0.0013468	synembryn-A	9	2	506	0.00399495
kinetochore scaffold 1	4	2342	0.00170794	magnesium transporter MRS2 homolog, mitochondrial	2	2	419	0.00478565
otoancorin	4	815	0.00490798	ubiquitin carboxyl-terminal hydrolase 7	8	2	1074.17	0.00186439
histone-lysine N-methyltransferase, H3 lysine-36 specific	4	2427	0.00164813	armadillo repeat-containing protein 12	11	2	326.5	0.0062283
uromodulin-like 1	4	1446	0.00276625	long-chain-fatty-acid--CoA ligase 1	2	2	687.684	0.00291105
palmitoyltransferase ZDHHC23	4	409	0.00977995	constitutive coactivator of PPAR-gamma-like protein 1	1	2	984.778	0.00215312
pleckstrin homology domain-containing family A member 7	4	1121	0.00356824	ankyrin repeat domain-containing protein 17	3	2	2006.62	0.00107582
glutamate receptor ionotropic, kainate 2	4	869	0.00460299	glutamate receptor ionotropic, delta-2	9	2	849.562	0.00242013
fibrocystin-L	4	4243	0.000942729	transcription factor jun-D	8	2	325.5	0.00617132
stAR-related lipid transfer protein 13	4	1105	0.00361991	alpha-catulin	11	2	728	0.00274752
PDZ domain-containing protein 2	4	2839	0.00140895	stomatin-like protein 2, mitochondrial	18	2	320.5	0.00626446
neuronal PAS domain-containing protein 4	4	802	0.00498753	S-adenosylmethionine decarboxylase proenzyme	8	2	279.5	0.00735959
A disintegrin and metalloproteinase with thrombospondin motifs 9	4	1935	0.00206718	otoferlin	19	2	1552.2	0.00135705
neuron navigator 2	4	2432	0.00164474	excitatory amino acid transporter 5	6	2	478	0.00458287
laminin subunit alpha-3	4	3333	0.00120012	squalene synthase	3	2	431.75	0.00464754
homeodomain-interacting protein kinase 1	4	1210	0.00330579	PH domain leucine-rich repeat-containing protein phosphatase 2	5	2	1289.5	0.00155204
protein FAM83H	4	1179	0.00339271	alpha-N-acetylgalactosaminide alpha-2,6-sialyltransferase 1	13	2	499.429	0.00419197
protein PRRC2C	4	2719	0.00147113	interferon alpha/beta receptor 2	11	2	515	0.0038835
protein PRRC2C	4	2718	0.00147167	interleukin-12 receptor subunit beta-1	5	2	690.75	0.00292322
protein PRRC2C	4	2714	0.00147384	coatomer subunit gamma-2	4	2	798.5	0.00252552
AT-hook DNA-binding motif-containing protein 1	4	1603	0.00249532	NK1 transcription factor-related protein 1	10	2	448	0.00446429
AT-hook DNA-binding motif-containing protein 1	4	1603	0.00249532	dedicator of cytokinesis protein 1	10	2	1791.94	0.00113796
AT-hook DNA-binding motif-containing protein 1	4	1603	0.00249532	ubiquitin carboxyl-terminal hydrolase 38	2	2	1018	0.00196518
AT-hook DNA-binding motif-containing protein 1	4	1603	0.00249532	DENN domain-containing protein 1C	2	2	817.667	0.00246454
AT-hook DNA-binding motif-containing protein 1	4	1603	0.00249532	endothelin-converting enzyme-like 1	5	2	774	0.00258398
nebulin	4	8494	0.000470921	erythroferrone	3	2	354	0.00564972
nebulin	4	8494	0.000470921	N-myc proto-oncogene protein	11	2	464	0.00431034
nebulin	4	8494	0.000470921	regulator of nonsense transcripts 1	24	2	1127.5	0.0017739
nebulin	4	8494	0.000470921	roquin-1	6	2	1117.5	0.00179029
nebulin	4	8494	0.000470921	bromodomain adjacent to zinc finger domain protein 2A	4	2	1855.91	0.0010878
nebulin	4	8463	0.000472646	inhibitor of Bruton tyrosine kinase	3	2	1366	0.0014645
nebulin	4	8463	0.000472646	heterogeneous nuclear ribonucleoprotein U-like protein 1	10	2	780.143	0.00256822
nebulin	4	8463	0.000472646	sodium/potassium/calcium exchanger 1	6	2	1019.61	0.00199774
nebulin	4	8432	0.000474383	antizyme inhibitor 1	6	2	394.364	0.00528794
nebulin	4	8401	0.000476134	small G protein signaling modulator 3	4	2	717.5	0.00280661
nebulin	4	8401	0.000476134	plakophilin-3	5	2	804.5	0.00248623
nebulin	4	8370	0.000477897	GAS2-like protein 3	2	2	681	0.00294534
nebulin	4	8370	0.000477897	TELO2-interacting protein 1 homolog	6	2	1024.25	0.00196825
nebulin	4	8370	0.000477897	ankyrin repeat and EF-hand domain-containing protein 1	5	2	681.5	0.00299224
nebulin	4	8339	0.000479674	probable G-protein coupled receptor 146	2	2	338.143	0.00591801
nebulin	4	8308	0.000481464	prefoldin subunit 3	6	2	195.5	0.0104132
nebulin	4	8308	0.000481464	mucin-5AC	28	2	5654	0.000353732
nebulin	4	8282	0.000482975	cilia- and flagella-associated protein 74	3	2	1509.62	0.00139514
nebulin	4	8282	0.000482975	cytoskeleton-associated protein 2-like	13	2	635	0.00319371
nebulin	4	8277	0.000483267	IQ and AAA domain-containing protein 1-like	7	2	818	0.00244499
nebulin	4	7553	0.000529591	zinc finger protein 446	10	2	377	0.0055117
very large A-kinase anchor protein	4	2679	0.00149309	protein APCDD1-like	24	2	506.5	0.00394913
palmitoyltransferase ZDHHC23	4	409	0.00977995	tomoregulin-2	9	2	355.5	0.00563553
PDZ domain-containing protein 2	4	2873	0.00139227	zinc finger protein 236	1	2	1723.83	0.00116732
PDZ domain-containing protein 2	4	2699	0.00148203	fibronectin	3	2	2353.27	0.000850753
PDZ domain-containing protein 2	4	2699	0.00148203	protein prune homolog 2	44	2	3082.78	0.000648777
ciliogenesis and planar polarity effector 1	4	3250	0.00123077	polyhomeotic-like protein 3	11	2	913.444	0.0022414
ciliogenesis and planar polarity effector 1	4	3250	0.00123077	MICOS complex subunit MIC13	1	2	130	0.0155844
ciliogenesis and planar polarity effector 1	4	3214	0.00124456	coiled-coil domain-containing protein 14	11	2	755.769	0.00268478
ciliogenesis and planar polarity effector 1	4	3208	0.00124688	chromodomain-helicase-DNA-binding protein 9	4	2	2711.68	0.000744018
centrosomal protein of 162 kDa	4	1365	0.0029304	spermatogenesis-associated protein 1	6	2	337.25	0.00624173
midasin	4	3591	0.0011139	beclin-1	8	2	378.4	0.00537392
filamin-A-interacting protein 1	4	1213	0.00329761	Krueppel-like factor 4	9	2	496	0.004037
filamin-A-interacting protein 1	4	1154	0.0034662	potassium channel subfamily K member 4	3	2	393	0.00508906
PH-interacting protein	4	1820	0.0021978	protein delta homolog 1	2	2	346.5	0.00583677
dystonin	4	7785	0.000513809	solute carrier family 27 member 3	18	2	665.5	0.00300734
matrilin-2	4	818	0.00488998	gypsy retrotransposon integrase-like protein 1	2	2	433.8	0.00473257
MAX gene-associated protein	4	3066	0.00130463	zinc finger and BTB domain-containing protein 7A	17	2	596.5	0.00335714
MAX gene-associated protein	4	2956	0.00135318	protocadherin-9	6	2	1122.3	0.00179295
RNA polymerase II-associated protein 1	4	1393	0.0028715	zinc finger protein 532	6	2	1236.15	0.00163052
inositol hexakisphosphate and diphosphoinositol-pentakisphosphate kinase 1	4	1408	0.00284091	toll-like receptor 2	6	2	784	0.00255102
serine/threonine-protein kinase SMG1	4	3689	0.0010843	proline-rich protein 14	19	2	585	0.0034188
serine/threonine-protein kinase SMG1	4	3663	0.001092	cysteine/serine-rich nuclear protein 1	1	2	529	0.00403857
serine/threonine-protein kinase SMG1	4	3637	0.00109981	protein dopey-2	21	2	2225.33	0.000900727
genetic suppressor element 1	4	1925	0.00207792	DNA topoisomerase 3-alpha	2	2	953.5	0.00210275
genetic suppressor element 1	4	1852	0.00215983	dual specificity testis-specific protein kinase 2	7	2	529.5	0.00380049
carbohydrate sulfotransferase 6	4	395	0.0101266	septin-10	7	2	410.043	0.0052739
chromodomain-helicase-DNA-binding protein 3	4	2060	0.00194175	contactin-associated protein-like 4	32	2	1183.46	0.00171896
nuclear receptor corepressor 1	4	2524	0.00158479	mucin-4	13	2	3782.75	0.00102941
nuclear receptor corepressor 1	4	2523	0.00158541	protein SMG5	19	2	969.8	0.00206355
nuclear receptor corepressor 1	4	2515	0.00159046	nucleolar GTP-binding protein 2	5	2	679.5	0.00300344
nuclear receptor corepressor 1	4	2514	0.00159109	tumor necrosis factor receptor superfamily member 27	3	2	265	0.00754717
nuclear receptor corepressor 1	4	2466	0.00162206	microtubule-associated protein 1B	2	2	2405	0.000832172
nuclear receptor corepressor 1	4	2448	0.00163399	caspase recruitment domain-containing protein 11	4	2	1154	0.0017331
kinesin-like protein KIF19	4	999	0.004004	ephrin type-A receptor 2	8	2	949	0.00210919
kinesin-like protein KIF19	4	957	0.00417973	kelch-like protein 10	3	2	608	0.00328947
FH1/FH2 domain-containing protein 3	4	1409	0.00283889	SCAN domain-containing protein 3	9	2	1189.14	0.00168554
FH1/FH2 domain-containing protein 3	4	1401	0.0028551	cullin-associated NEDD8-dissociated protein 1	9	2	1209.75	0.0016534
BRD4-interacting chromatin-remodeling complex-associated protein	4	1560	0.0025641	netrin-4	2	2	603.75	0.00331467
pleckstrin homology domain-containing family G member 2	4	1386	0.002886	zinc finger protein 875	1	2	602.933	0.00339683
symplekin	4	1274	0.00313972	LON peptidase N-terminal domain and RING finger protein 1	2	2	692.333	0.00296734
transcription factor-like 5 protein	4	499	0.00801603	MAGUK p55 subfamily member 3	1	2	456.111	0.00473929
nuclear receptor-interacting protein 1	4	1158	0.00345423	acyl-CoA synthetase short-chain family member 3, mitochondrial	17	2	608.667	0.00341025
nuclear receptor-interacting protein 1	4	1158	0.00345423	heterogeneous nuclear ribonucleoprotein A3	4	2	355	0.00565043
uncharacterized protein KIAA1671	4	1806	0.00221484	protein timeless homolog	4	2	1207.5	0.00165631
uncharacterized protein KIAA1671	4	1806	0.00221484	pygopus homolog 1	3	2	419	0.00477327
SLIT and NTRK-like protein 2	4	845	0.00473373	tripartite motif-containing protein 29	4	2	390.4	0.00538441
SLIT and NTRK-like protein 2	4	845	0.00473373	trinucleotide repeat-containing gene 6A protein	8	2	1876.8	0.00106841
SLIT and NTRK-like protein 2	4	845	0.00473373	uncharacterized protein C19orf57	6	2	579.667	0.00378343
SLIT and NTRK-like protein 2	4	845	0.00473373	E3 ubiquitin-protein ligase TRIM8	8	2	535	0.00374166
protocadherin Fat 1	4	4600	0.000869565	syntaxin-18	9	2	281	0.00723939
protocadherin Fat 1	4	4600	0.000869565	neuroblast differentiation-associated protein AHNAK	6	2	5873.25	0.000340535
girdin	4	2027	0.00197336	epidermal growth factor receptor	24	2	910.375	0.00250552
laminin subunit beta-2	4	1798	0.00222469	dual specificity tyrosine-phosphorylation-regulated kinase 1A	45	2	710.867	0.00286013
histone-lysine N-methyltransferase SETD5	4	1442	0.00277393	dynein heavy chain 3, axonemal	3	2	3606.21	0.000586273
E3 ubiquitin-protein ligase MYCBP2	4	4755	0.00084122	F-box only protein 30	5	2	745	0.00268456
neurobeachin	4	2941	0.00136008	G-protein coupled receptor 42	8	2	346	0.00578035
glutamate receptor ionotropic, kainate 2	4	859	0.00465658	neuritin-like protein	3	2	127	0.0172966
laminin subunit alpha-2	4	3210	0.00124611	uncharacterized protein C2orf42	20	2	574	0.00348432
laminin subunit alpha-2	4	3206	0.00124766	DNA damage-regulated autophagy modulator protein 2	9	2	200.286	0.0109095
laminin subunit alpha-4	4	1823	0.00219419	diacylglycerol kinase beta	3	2	772.217	0.00260361
laminin subunit alpha-4	4	1823	0.00219419	sorting nexin-13	1	2	870.714	0.0023084
NHS-like protein 1	4	1654	0.00241838	S-adenosylmethionine mitochondrial carrier protein	17	2	237.667	0.00881574
disheveled-associated activator of morphogenesis 1	4	1078	0.00371058	tRNA (cytosine(72)-C(5))-methyltransferase NSUN6	1	2	470	0.0042554
disheveled-associated activator of morphogenesis 1	4	1078	0.00371058	zinc finger protein 292	47	2	2579.5	0.000775867
E3 ubiquitin-protein ligase HECTD1	4	2610	0.00153257	rap guanine nucleotide exchange factor 2	7	2	1606.35	0.00124707
signal-induced proliferation-associated 1-like protein 1	4	1804	0.00221729	pleckstrin homology domain-containing family M member 1	10	2	989	0.00203315
homeobox protein SIX4	4	773	0.00517464	histone-lysine N-methyltransferase SETD1B	4	2	1966	0.00101729
nck-associated protein 5-like	4	1289	0.00310318	asparagine synthetase domain-containing protein 1	11	2	643	0.00311042
neuron navigator 3	4	2356	0.00169779	membrane-spanning 4-domains subfamily A member 18	5	2	398	0.00502513
Hermansky-Pudlak syndrome 1 protein	4	700	0.00571429	serine/threonine-protein kinase B-raf	33	2	755.75	0.00265294
WASH complex subunit 2A	4	1317	0.00303721	dynamin-like 120 kDa protein, mitochondrial	33	2	942.9	0.00212983
WASH complex subunit 2A	4	1312	0.00304878	zinc finger protein 214	7	2	600.375	0.003332
multimerin-2	4	888	0.0045045	putative uncharacterized protein C3orf49	59	2	292.5	0.00683763
disks large homolog 5	4	1915	0.00208877	homeobox protein NANOGP8	8	2	305	0.00655738
homeodomain-interacting protein kinase 1	4	1209	0.00330852	zinc fingers and homeoboxes protein 2	4	2	837	0.00238949
homeodomain-interacting protein kinase 1	4	1185	0.00337553	limb region 1 protein homolog	18	2	415	0.00481928
homeodomain-interacting protein kinase 1	4	1210	0.00330579	drebrin	8	2	643.1	0.00320624
glutamate receptor 4	4	902	0.00443459	AP-4 complex accessory subunit tepsin	41	2	623.077	0.00329087
dmX-like protein 1	4	3086	0.00129618	39S ribosomal protein L35, mitochondrial	2	2	178.333	0.0112341
dmX-like protein 1	4	3020	0.0013245	DNA topoisomerase 2-binding protein 1	11	2	1412	0.00144661
homeodomain-interacting protein kinase 1	4	1176	0.00340136	AP-5 complex subunit zeta-1	2	2	729	0.00277526
dynein heavy chain 6, axonemal	4	4158	0.000962001	astrotactin-2	49	2	1320.67	0.00151486
nebulin	4	8370	0.000477897	SH3 and PX domain-containing protein 2A	4	2	1059.5	0.00189117
nebulin	4	8370	0.000477897	coiled-coil domain-containing protein 142	9	2	746.5	0.00267923
dedicator of cytokinesis protein 10	4	2206	0.00181324	SKI family transcriptional corepressor 1	32	2	965	0.00207254
protein TANC1	4	1677	0.00238521	kinesin-like protein KIF1B	3	2	1800.67	0.00111086
palmitoyltransferase ZDHHC23	4	424	0.00943396	serine/threonine-protein kinase MRCK alpha	11	2	1754	0.00114178
protocadherin Fat 1	4	4588	0.00087184	zinc finger protein 142	3	2	1242.64	0.00699858
PDZ domain-containing protein 2	4	2542	0.00157356	protein O-mannosyl-transferase TMTC3	54	2	823.4	0.00245215
centrosomal protein of 162 kDa	4	1327	0.00301432	CBY1-interacting BAR domain-containing protein 2	19	2	296	0.00676677
midasin	4	3744	0.00106838	rho guanine nucleotide exchange factor 4	2	2	1729	0.00117451
anillin	4	1142	0.00350263	kinase suppressor of Ras 1	9	2	810.25	0.00260089
anillin	4	1105	0.00361991	putative Polycomb group protein ASXL2	1	2	1329	0.0015161
myomesin-2	4	1445	0.00276817	cysteine and glycine-rich protein 3	10	2	150	0.0133333
WASH complex subunit 2A	4	1290	0.00310078	probable N-acetyltransferase 16	6	2	369	0.00542005
1-phosphatidylinositol 4,5-bisphosphate phosphodiesterase epsilon-1	4	2316	0.00172712	ubiquitin-associated protein 2	5	2	1087.57	0.00184056
1-phosphatidylinositol 4,5-bisphosphate phosphodiesterase epsilon-1	4	2315	0.00172786	anoctamin-7	6	2	883.667	0.00226894
1-phosphatidylinositol 4,5-bisphosphate phosphodiesterase epsilon-1	4	2300	0.00173913	putative uncharacterized protein LOC400499	3	2	2893.78	0.000720856
multimerin-2	4	888	0.0045045	rab11 family-interacting protein 5	20	2	1324	0.00151057
disks large homolog 5	4	1342	0.00298063	inactive ubiquitin carboxyl-terminal hydrolase 53	7	2	1041	0.00192468
neuron navigator 2	4	2465	0.00162272	LON peptidase N-terminal domain and RING finger protein 2	21	2	632.5	0.00328321
neuron navigator 2	4	2455	0.00162933	SH3 and multiple ankyrin repeat domains protein 3	3	2	1806	0.00110742
neuron navigator 2	4	2416	0.00165563	condensin-2 complex subunit D3	7	2	1433.6	0.00139765
glutamate receptor 4	4	902	0.00443459	dynein heavy chain 10, axonemal	6	2	4105	0.00051623
histone-lysine N-methyltransferase 2A	4	3133	0.00127673	focadhesin	19	2	1773.85	0.00112861
protein FAM186B	4	862	0.00464037	oxygen-regulated protein 1	5	2	1623	0.0014212
E3 ubiquitin-protein ligase MYCBP2	4	4789	0.000835247	vitamin D 25-hydroxylase	1	2	411.929	0.00489157
E3 ubiquitin-protein ligase MYCBP2	4	4737	0.000844416	serine/threonine-protein phosphatase with EF-hands 1	3	2	616.5	0.00325852
E3 ubiquitin-protein ligase MYCBP2	4	4703	0.000850521	myotubularin-related protein 4	35	2	1198.67	0.00166855
E3 ubiquitin-protein ligase MYCBP2	4	4689	0.00085306	ankyrin and armadillo repeat-containing protein	33	2	1252.89	0.00163327
E3 ubiquitin-protein ligase MYCBP2	4	4752	0.000841751	histone deacetylase 4	5	2	1056.55	0.00191398
neurobeachin	4	2962	0.00135044	Alstrom syndrome protein 1	3	2	4168.5	0.000479789
neurobeachin	4	2938	0.00136147	nyctalopin	3	2	481	0.004158
neurobeachin	4	2943	0.00135916	Uncharacterized LOC116804918	36	2	2469	0.000810045
inositol hexakisphosphate and diphosphoinositol-pentakisphosphate kinase 1	4	1366	0.00292826	SH3 and multiple ankyrin repeat domains protein 2	12	2	1628.14	0.00126318
hydrocephalus-inducing protein homolog	4	5138	0.000778513	guanine nucleotide-binding protein subunit beta-5	4	2	322.8	0.00649464
chromodomain-helicase-DNA-binding protein 3	4	2025	0.00197531	UPF0450 protein C17orf58	7	2	339	0.00589971
nuclear receptor corepressor 1	4	2524	0.00158479	son of sevenless homolog 1	17	2	1313.25	0.00152338
nuclear receptor corepressor 1	4	2523	0.00158541	sialic acid-binding Ig-like lectin 5	15	2	522.333	0.00386239
nuclear receptor corepressor 1	4	2511	0.00159299	protein PRRC2B	3	2	2066.6	0.00099359
nuclear receptor corepressor 1	4	2456	0.00162866	inactive tyrosine-protein kinase PEAK1	8	2	1677.54	0.0012167
pleckstrin homology domain-containing family G member 2	4	1327	0.00301432	immunoglobulin superfamily member 10	15	2	2633.29	0.000759576
nuclear receptor coactivator 6	4	1975	0.00202532	multiple epidermal growth factor-like domains protein 6	10	2	1494	0.00134331
uncharacterized protein KIAA1671	4	1806	0.00221484	serine/threonine-protein kinase/endoribonuclease IRE1	8	2	990.333	0.0020201
serine/threonine-protein kinase WNK3	4	1743	0.00229489	protocadherin Fat 2	3	2	4126.67	0.000493788
uncharacterized protein C1orf105	4	210	0.0190476	glucokinase regulatory protein	9	2	479	0.004603
low-density lipoprotein receptor-related protein 2	4	4612	0.000867303	aryl hydrocarbon receptor	1	2	848	0.00235849
low-density lipoprotein receptor-related protein 2	4	3892	0.00102775	intestinal-type alkaline phosphatase	8	2	528	0.00378788
nebulin	4	8277	0.000483267	sodium/potassium-transporting ATPase subunit beta-3	5	2	279	0.00716846
nebulin	4	7796	0.000513084	azurocidin	10	2	251	0.00796813
anaphase-promoting complex subunit 1	4	1948	0.00205339	chondroitin sulfate proteoglycan 4	11	2	2322	0.000861326
protein TANC1	4	1755	0.0022792	dermatopontin	12	2	201	0.00995025
protein TANC1	4	1554	0.002574	chymotrypsin-like elastase family member 1	9	2	258	0.00775194
palmitoyltransferase ZDHHC23	4	435	0.0091954	fibrillin-2	6	2	2886.5	0.000692935
palmitoyltransferase ZDHHC23	4	412	0.00970874	kallikrein-1	6	2	211	0.0100668
anaphase-promoting complex subunit 4	4	697	0.00573888	laminin subunit gamma-1	12	2	1609	0.00124301
PDZ domain-containing protein 2	4	2873	0.00139227	DNA ligase 3	15	2	988.6	0.00202482
PDZ domain-containing protein 2	4	2873	0.00139227	low-density lipoprotein receptor-related protein 4	4	2	1627.75	0.00127533
PDZ domain-containing protein 2	4	2861	0.00139811	alpha-2-macroglobulin receptor-associated protein	5	2	357	0.00560224
PDZ domain-containing protein 2	4	2839	0.00140895	tumor-associated calcium signal transducer 2	7	2	323	0.00619195
PDZ domain-containing protein 2	4	2781	0.00143833	macrophage mannose receptor 1	6	2	1456	0.00137363
little elongation complex subunit 1	4	2139	0.00187003	mutS protein homolog 4	6	2	936	0.00213675
ciliogenesis and planar polarity effector 1	4	3251	0.00123039	mitogen-activated protein kinase kinase kinase 10	12	2	784	0.00270872
ciliogenesis and planar polarity effector 1	4	3251	0.00123039	mucin-5B	12	2	5762	0.000347102
ciliogenesis and planar polarity effector 1	4	3233	0.00123724	neurotensin receptor type 1	19	2	377	0.00536853
ciliogenesis and planar polarity effector 1	4	3215	0.00124417	oligophrenin-1	14	2	799	0.0025032
ciliogenesis and planar polarity effector 1	4	3199	0.00125039	oviduct-specific glycoprotein	9	2	678	0.00294985
ciliogenesis and planar polarity effector 1	4	3145	0.00127186	polyadenylate-binding protein 1	5	2	636	0.00314465
ciliogenesis and planar polarity effector 1	4	3023	0.00132319	pappalysin-1	8	2	1608	0.00124395
fibrocystin	4	3837	0.00104248	26S proteasome regulatory subunit 6A	7	2	450	0.0044471
fibrocystin	4	3278	0.00122026	receptor-type tyrosine-protein phosphatase C	9	2	1228.2	0.00163174
dystonin	4	7794	0.000513215	glycogen phosphorylase, brain form	16	2	843	0.00237248
ATP-binding cassette sub-family A member 13	4	4861	0.000822876	pregnancy zone protein	2	2	1296.9	0.00161338
ATP-binding cassette sub-family A member 13	4	4468	0.000895255	arginine--tRNA ligase, cytoplasmic	3	2	660	0.0030303
ATP-binding cassette sub-family A member 13	4	4456	0.000897666	retinol-binding protein 3	4	2	1247	0.00160385
ATP-binding cassette sub-family A member 13	4	4329	0.000924001	40S ribosomal protein S2	4	2	293	0.00682594
ATP-binding cassette sub-family A member 13	4	4298	0.000930665	SH2 domain-containing adapter protein B	5	2	509	0.00392927
ATP-binding cassette sub-family A member 13	4	4030	0.000992556	SWI/SNF-related matrix-associated actin-dependent regulator of chromatin subfamily D member 1	14	2	432	0.00496737
ATP-binding cassette sub-family A member 13	4	4024	0.000994036	transcription factor SOX-4	2	2	474	0.00421941
ATP-binding cassette sub-family A member 13	4	3781	0.00105792	transcription initiation factor TFIID subunit 2	4	2	1099.58	0.00182859
ATP-binding cassette sub-family A member 13	4	3717	0.00107614	toll-like receptor 3	15	2	904	0.00221239
ATP-binding cassette sub-family A member 13	4	3424	0.00116822	toll-like receptor 5	24	2	858	0.002331
ATP-binding cassette sub-family A member 13	4	3341	0.00119725	protein HIRA	2	2	1017	0.00196657
ATP-binding cassette sub-family A member 13	4	3341	0.00119725	zinc finger protein 45	7	2	671.2	0.00298158
maltase-glucoamylase, intestinal	4	2753	0.00145296	protein bassoon	2	2	3926	0.000509424
maltase-glucoamylase, intestinal	4	2753	0.00145296	secretogranin-2	7	2	617	0.00324149
maltase-glucoamylase, intestinal	4	2753	0.00145296	sterol O-acyltransferase 2	4	2	522	0.00383142
maltase-glucoamylase, intestinal	4	2753	0.00145296	insulin receptor substrate 2	16	2	1338	0.00149477
putative maltase-glucoamylase-like protein FLJ16351	4	2245	0.00178174	myomesin-1	2	2	1666.25	0.0012013
putative maltase-glucoamylase-like protein FLJ16351	4	1660	0.00240964	disintegrin and metalloproteinase domain-containing protein 21	1	2	722	0.00277008
putative maltase-glucoamylase-like protein FLJ16351	4	1277	0.00313234	disintegrin and metalloproteinase domain-containing protein 20	17	2	751	0.00266607
maestro heat-like repeat-containing protein family member 6	4	680	0.00588235	FAS-associated death domain protein	3	2	208	0.00961538
maestro heat-like repeat-containing protein family member 6	4	675	0.00592593	GMP synthase [glutamine-hydrolyzing]	6	2	692.667	0.00288756
fibrocystin-L	4	4243	0.000942729	IgGFc-binding protein	2	2	5405	0.000370028
RB1-inducible coiled-coil protein 1	4	1594	0.00250941	translation initiation factor eIF-2B subunit epsilon	5	2	721	0.00277393
RB1-inducible coiled-coil protein 1	4	1587	0.00252048	serine/threonine-protein kinase PRP4 homolog	1	2	976.25	0.00205732
RB1-inducible coiled-coil protein 1	4	1584	0.00252525	cryptochrome-1	2	2	595	0.00336825
RB1-inducible coiled-coil protein 1	4	1542	0.00259403	serpin B9	6	2	345.4	0.00581997
RB1-inducible coiled-coil protein 1	4	1479	0.00270453	bone morphogenetic protein receptor type-1A	4	2	532	0.0037594
protein unc-13 homolog B	4	1989	0.00201106	caldesmon	5	2	594.6	0.00344153
protein unc-13 homolog B	4	1971	0.00202943	segment polarity protein dishevelled homolog DVL-3	6	2	717	0.00278941
hemicentin-2	4	5038	0.000793966	ephrin type-B receptor 3	11	2	998	0.00200401
hemicentin-2	4	5035	0.000794439	bifunctional glutamate/proline--tRNA ligase	4	2	1249	0.00167557
hemicentin-2	4	5020	0.000796813	epidermal growth factor receptor kinase substrate 8	14	2	826.429	0.00242024
hemicentin-2	4	4790	0.000835073	forkhead box protein D1	12	2	465	0.00430108
neuron navigator 2	4	2485	0.00160966	kinesin-1 heavy chain	18	2	916	0.00218917
neuron navigator 2	4	2466	0.00162206	neurogenic locus notch homolog protein 4	11	2	2003	0.000998502
neuron navigator 2	4	2452	0.00163132	tyrosine-protein kinase transmembrane receptor ROR2	26	2	805.667	0.00256843
neuron navigator 2	4	2451	0.00163199	protein SCO1 homolog, mitochondrial	2	2	301	0.00664452
neuron navigator 2	4	2445	0.00163599	coilin	8	2	576	0.00347222
neuron navigator 2	4	2430	0.00164609	ubiquitin carboxyl-terminal hydrolase BAP1	4	2	729.5	0.0027426
neuron navigator 2	4	2418	0.00165426	protein SCAF11	4	2	1447.9	0.00138182
neuron navigator 2	4	2395	0.00167015	centromere/kinetochore protein zw10 homolog	7	2	684.333	0.0029808
IQ motif and SEC7 domain-containing protein 3	4	1063	0.00376294	potassium voltage-gated channel subfamily B member 2	4	2	747.667	0.0027338
protein dispatched homolog 2	4	1401	0.0028551	mediator of RNA polymerase II transcription subunit 1	1	2	1450.67	0.0013843
inositol hexakisphosphate and diphosphoinositol-pentakisphosphate kinase 1	4	1479	0.00270453	ras GTPase-activating protein nGAP	8	2	1275.92	0.00157973
inositol hexakisphosphate and diphosphoinositol-pentakisphosphate kinase 1	4	1479	0.00270453	A-kinase anchor protein 5	3	2	427	0.00468384
inositol hexakisphosphate and diphosphoinositol-pentakisphosphate kinase 1	4	1479	0.00270453	fragile X mental retardation syndrome-related protein 2	1	2	673	0.00297177
inositol hexakisphosphate and diphosphoinositol-pentakisphosphate kinase 1	4	1479	0.00270453	corepressor interacting with RBPJ 1	2	2	450	0.00444444
carbohydrate sulfotransferase 6	4	395	0.0101266	potassium voltage-gated channel subfamily B member 1	2	2	858	0.002331
hydrocephalus-inducing protein homolog	4	5182	0.000771903	DNA-directed RNA polymerase, mitochondrial	8	2	1233.5	0.00162142
hydrocephalus-inducing protein homolog	4	5172	0.000773395	E3 ubiquitin-protein ligase CBL	4	2	906	0.00220751
hydrocephalus-inducing protein homolog	4	5155	0.000775946	proto-oncogene c-Fos	4	2	380	0.00526316
hydrocephalus-inducing protein homolog	4	5148	0.000777001	guanine nucleotide-binding protein G(I)/G(S)/G(T) subunit beta-2	6	2	340	0.00588235
transport and Golgi organization protein 6 homolog	4	942	0.00424628	G-protein coupled receptor 4	6	2	362	0.00552486
nuclear receptor corepressor 1	4	2524	0.00158479	free fatty acid receptor 3	33	2	364.5	0.00550114
nuclear receptor corepressor 1	4	2523	0.00158541	proto-oncogene tyrosine-protein kinase Src	6	2	539.429	0.00370774
nuclear receptor corepressor 1	4	2405	0.0016632	alpha-tectorin	27	2	2155	0.000928074
nuclear receptor corepressor 1	4	2337	0.0017116	ras association domain-containing protein 9	18	2	424.5	0.00471431
protein sidekick-2	4	2153	0.00185787	cerberus	10	2	267	0.00749064
protein sidekick-2	4	2135	0.00187354	gamma-aminobutyric acid type B receptor subunit 2	3	2	787.5	0.0025886
ubiquitin carboxyl-terminal hydrolase 32	4	1634	0.00244798	phospholipid-transporting ATPase ABCA1	13	2	2206.92	0.000915351
ubiquitin carboxyl-terminal hydrolase 32	4	1620	0.00246914	C-C chemokine receptor type 4	25	2	360	0.00555556
ubiquitin carboxyl-terminal hydrolase 32	4	1618	0.00247219	lymphocyte cytosolic protein 2	13	2	533	0.00375235
ubiquitin carboxyl-terminal hydrolase 32	4	1615	0.00247678	lysyl oxidase homolog 1	12	2	509.5	0.00398935
ubiquitin carboxyl-terminal hydrolase 32	4	1608	0.00248756	neutral amino acid transporter B(0)	8	2	541	0.00369686
ubiquitin carboxyl-terminal hydrolase 32	4	1601	0.00249844	secretory carrier-associated membrane protein 3	6	2	334	0.00599711
ubiquitin carboxyl-terminal hydrolase 32	4	1572	0.00254453	E3 ubiquitin-protein ligase ARIH1	10	2	557	0.00359066
laminin subunit alpha-3	4	3342	0.00119689	ras GTPase-activating protein-binding protein 1	2	2	466	0.00429185
laminin subunit alpha-3	4	3339	0.00119796	formin-like protein 1	2	2	1128.82	0.00177297
laminin subunit alpha-3	4	3336	0.00119904	calicin	2	2	588	0.00340136
laminin subunit alpha-3	4	3298	0.00121286	protein ENL	2	2	561	0.0035711
laminin subunit alpha-3	4	3243	0.00123343	AT-rich interactive domain-containing protein 1A	3	2	2285	0.000875274
FH1/FH2 domain-containing protein 3	4	1467	0.00272665	nucleic acid dioxygenase ALKBH1	5	2	389	0.00514139
BRD4-interacting chromatin-remodeling complex-associated protein	4	1514	0.00264201	laminin subunit gamma-3	4	2	1578	0.00126743
BRD4-interacting chromatin-remodeling complex-associated protein	4	1501	0.00266489	toll-like receptor 6	10	2	796	0.00251256
pleckstrin homology domain-containing family G member 2	4	1387	0.00288392	sex comb on midleg-like protein 2	3	2	625.667	0.00328779
symplekin	4	1274	0.00313972	spondin-1	10	2	807	0.00247831
transcription factor-like 5 protein	4	530	0.00754717	neurofilament light polypeptide	33	2	543	0.00368324
nuclear receptor coactivator 6	4	2068	0.00193424	nuclear transcription factor Y subunit beta	14	2	207.5	0.00963861
nuclear receptor coactivator 6	4	2057	0.00194458	homeobox protein Nkx-6.1	7	2	367	0.00544959
nuclear receptor coactivator 6	4	2056	0.00194553	phosphatidylinositol 4,5-bisphosphate 3-kinase catalytic subunit alpha	11	2	1068	0.00187266
nuclear receptor-interacting protein 1	4	1158	0.00345423	POU domain, class 4, transcription factor 1	11	2	419	0.00477327
nuclear receptor-interacting protein 1	4	1158	0.00345423	double-strand-break repair protein rad21 homolog	3	2	631	0.00316957
nuclear receptor-interacting protein 1	4	1158	0.00345423	E3 SUMO-protein ligase RanBP2	6	2	3023.89	0.000675524
nuclear receptor-interacting protein 1	4	1158	0.00345423	transcription initiation factor TFIID subunit 10	2	2	218	0.00917431
nuclear receptor-interacting protein 1	4	1158	0.00345423	zinc finger protein 230	4	2	474	0.00421941
uromodulin-like 1	4	1268	0.00315457	transforming acidic coiled-coil-containing protein 3	3	2	743.4	0.00281747
unconventional myosin-XVIIIb	4	2610	0.00153257	cartilage-associated protein	2	2	401	0.00498753
unconventional myosin-XVIIIb	4	2610	0.00153257	brefeldin A-inhibited guanine nucleotide-exchange protein 2	2	2	1784.5	0.00112076
unconventional myosin-XVIIIb	4	2610	0.00153257	brefeldin A-inhibited guanine nucleotide-exchange protein 1	4	2	1835.25	0.00108991
unconventional myosin-XVIIIb	4	2610	0.00153257	protein mono-ADP-ribosyltransferase PARP4	15	2	1739.67	0.00114983
unconventional myosin-XVIIIb	4	2609	0.00153315	pre-mRNA-processing-splicing factor 8	10	2	2335	0.000856531
unconventional myosin-XVIIIb	4	2163	0.00184928	regulatory solute carrier protein family 1 member 1	23	2	617	0.00324149
serine/threonine-protein kinase WNK3	4	1753	0.0022818	nestin	29	2	1621	0.00123381
protocadherin-11 X-linked	4	1376	0.00290698	D-3-phosphoglycerate dehydrogenase	28	2	549.333	0.00368414
protocadherin-11 X-linked	4	1376	0.00290698	fibroblast growth factor receptor substrate 3	13	2	492	0.00406504
protocadherin-11 X-linked	4	1368	0.00292398	ATP-dependent Clp protease ATP-binding subunit clpX-like, mitochondrial	24	2	626	0.00319529
protocadherin-11 X-linked	4	1358	0.00294551	transcription factor HIVEP2	4	2	2446	0.000817661
protocadherin-11 X-linked	4	1347	0.00296956	interferon-related developmental regulator 2	6	2	442	0.00452489
la-related protein 1B	4	1119	0.00357462	BRCA1-associated protein	24	2	485.286	0.00433669
la-related protein 1B	4	1116	0.00358423	ATP-dependent RNA helicase DDX18	11	2	670	0.00298507
la-related protein 1B	4	1103	0.00362647	mRNA decay activator protein ZFP36L2	5	2	494	0.00404858
la-related protein 1B	4	1096	0.00364964	ras-specific guanine nucleotide-releasing factor 2	4	2	1189.5	0.00168406
la-related protein 1B	4	1092	0.003663	helicase SKI2W	7	2	1139.5	0.00177062
la-related protein 1B	4	1088	0.00367647	son of sevenless homolog 2	2	2	1332	0.0015015
la-related protein 1B	4	1076	0.00371747	leiomodin-1	2	2	600	0.00333333
la-related protein 1B	4	1056	0.00378788	ras GTPase-activating protein-binding protein 2	2	2	472.1	0.00424087
dynein heavy chain 6, axonemal	4	4158	0.000962001	PR domain zinc finger protein 4	2	2	805.667	0.00248246
dynein heavy chain 6, axonemal	4	4158	0.000962001	ras suppressor protein 1	6	2	259.333	0.00778967
dynein heavy chain 6, axonemal	4	4116	0.000971817	tolloid-like protein 2	2	2	1015	0.00197044
dynein heavy chain 6, axonemal	4	4109	0.000973473	serine/threonine-protein phosphatase 2A regulatory subunit B'' subunit beta	7	2	568.333	0.0035193
dynein heavy chain 6, axonemal	4	4028	0.000993049	E3 ubiquitin-protein ligase MYLIP	4	2	422.333	0.00475074
dynein heavy chain 6, axonemal	4	3830	0.00104439	protocadherin beta-1	4	2	818	0.00244499
dynein heavy chain 6, axonemal	4	3737	0.00107038	anaphase-promoting complex subunit 2	30	2	822	0.00243309
baculoviral IAP repeat-containing protein 6	4	4779	0.000836995	ADP-ribose glycohydrolase MACROD1	3	2	327.667	0.0061049
baculoviral IAP repeat-containing protein 6	4	3989	0.00100276	photoreceptor-specific nuclear receptor	9	2	388.5	0.00516382
dynein heavy chain 12, axonemal	4	3949	0.00101291	mitochondrial ornithine transporter 1	36	2	301	0.00664452
dynein heavy chain 12, axonemal	4	3939	0.00101549	prolyl 3-hydroxylase 3	9	2	736	0.00271739
dynein heavy chain 12, axonemal	4	3913	0.00102223	zinc finger protein 318	3	2	2279	0.000877578
microtubule-associated protein 4	4	2325	0.00172043	zinc finger protein 324A	6	2	555.5	0.00360043
microtubule-associated protein 4	4	2311	0.00173085	hormonally up-regulated neu tumor-associated kinase	7	2	706	0.00283322
microtubule-associated protein 4	4	2309	0.00173235	suppressor of cytokine signaling 7	12	2	610.667	0.00328211
microtubule-associated protein 4	4	2294	0.00174368	melanoma-associated antigen D2	2	2	606	0.00330033
microtubule-associated protein 4	4	2288	0.00174825	mediator of DNA damage checkpoint protein 1	3	2	2017.15	0.000994092
microtubule-associated protein 4	4	2239	0.00178651	lysine-specific demethylase 4A	5	2	1064	0.0018797
histone-lysine N-methyltransferase SETD5	4	1500	0.00266667	ubiquitin-protein ligase E3C	15	2	1067.67	0.00187344
histone-lysine N-methyltransferase SETD5	4	1500	0.00266667	ER degradation-enhancing alpha-mannosidase-like protein 1	6	2	550.333	0.00369748
histone-lysine N-methyltransferase SETD5	4	1481	0.00270088	RNA helicase aquarius	19	2	1485	0.0013468
histone-lysine N-methyltransferase SETD5	4	1455	0.00274914	EEF1AKMT4-ECE2 readthrough transcript protein	7	2	883	0.00226501
histone-lysine N-methyltransferase SETD5	4	1350	0.00296296	kinetochore-associated protein 1	3	2	1840.2	0.00112392
histone-lysine N-methyltransferase SETD5	4	1350	0.00296296	histone-lysine N-methyltransferase 2B	2	2	2464.17	0.000833311
neurobeachin	4	2488	0.00160772	regulating synaptic membrane exocytosis protein 3	9	2	310	0.00645188
M-phase phosphoprotein 8	4	879	0.00455063	centrosome-associated protein 350	4	2	3157.33	0.000633477
midasin	4	5499	0.000727405	nucleolar pre-ribosomal-associated protein 1	12	2	2271	0.000880669
filamin-A-interacting protein 1	4	965	0.00414508	zinc finger BED domain-containing protein 4	3	2	1171	0.00170794
glutamate receptor ionotropic, kainate 2	4	892	0.0044843	chondroitin sulfate synthase 1	4	2	657.4	0.00316238
laminin subunit alpha-2	4	3208	0.00124688	regulating synaptic membrane exocytosis protein 1	8	2	1559.83	0.00128346
PH-interacting protein	4	1649	0.00242571	WD repeat and FYVE domain-containing protein 3	15	2	3326	0.000617343
NHS-like protein 1	4	1672	0.00239234	lysine-specific demethylase 4B	8	2	939.5	0.00235286
NHS-like protein 1	4	1672	0.00239234	uncharacterized protein KIAA0754	14	2	1427	0.00140154
NHS-like protein 1	4	1625	0.00246154	signal-induced proliferation-associated 1-like protein 3	17	2	1780.75	0.00112312
NHS-like protein 1	4	1624	0.00246305	TBC1 domain family member 2B	4	2	884	0.00228834
NHS-like protein 1	4	1618	0.00247219	cyclin-dependent kinase 12	1	2	1376.67	0.00145657
NHS-like protein 1	4	1610	0.00248447	zinc finger ZZ-type and EF-hand domain-containing protein 1	2	2	2717.6	0.000770583
NHS-like protein 1	4	1607	0.00248911	zinc finger CCCH domain-containing protein 3	8	2	922.5	0.0022487
NHS-like protein 1	4	1607	0.00248911	pleckstrin homology domain-containing family M member 2	14	2	975.6	0.00206599
NHS-like protein 1	4	1548	0.00258398	zinc finger RNA-binding protein 2	19	2	939.5	0.00212879
DNA polymerase zeta catalytic subunit	4	2328	0.00171821	GDP-fucose protein O-fucosyltransferase 2	20	2	414.9	0.00519372
E3 ubiquitin-protein ligase HECTD1	4	2608	0.00153374	[F-actin]-monooxygenase MICAL3	23	2	2002	0.000999001
E3 ubiquitin-protein ligase HECTD1	4	2331	0.001716	ankyrin repeat and SAM domain-containing protein 1A	14	2	1057.08	0.00200819
signal-induced proliferation-associated 1-like protein 1	4	1804	0.00221729	kinesin-like protein KIF13B	6	2	1767.88	0.00113611
signal-induced proliferation-associated 1-like protein 1	4	1804	0.00221729	FK506-binding protein 15	2	2	1180	0.00169635
signal-induced proliferation-associated 1-like protein 1	4	1804	0.00221729	apoptosis-stimulating of p53 protein 1	23	2	1093.5	0.00184828
signal-induced proliferation-associated 1-like protein 1	4	1804	0.00221729	exosome RNA helicase MTR4	8	2	1042	0.00191939
WASH complex subunit 4	4	1128	0.0035461	elongator complex protein 5	12	2	308.6	0.00649698
WASH complex subunit 4	4	985	0.00406091	pannexin-1	17	2	331.333	0.00625978
WASH complex subunit 4	4	859	0.00465658	vacuolar protein sorting-associated protein 13D	26	2	4375.5	0.000457094
A disintegrin and metalloproteinase with thrombospondin motifs 20	4	1911	0.00209314	calmodulin-regulated spectrin-associated protein 1	82	2	1470.38	0.00136541
neuron navigator 3	4	2349	0.00170285	protein virilizer homolog	9	2	1478	0.00138194
neuron navigator 3	4	2342	0.00170794	pentatricopeptide repeat-containing protein 1, mitochondrial	3	2	700	0.00285714
neuron navigator 3	4	2186	0.00182983	KIF-binding protein	2	2	488	0.00442721
sorbin and SH3 domain-containing protein 1	4	1530	0.00261438	group 3 secretory phospholipase A2	37	2	388.333	0.0053748
sorbin and SH3 domain-containing protein 1	4	1505	0.00265781	NADPH oxidase 3	26	2	568	0.00352113
sorbin and SH3 domain-containing protein 1	4	1380	0.00289855	podocalyxin-like protein 2	2	2	605	0.00330579
sorbin and SH3 domain-containing protein 1	4	1141	0.0035057	membrane-bound transcription factor site-2 protease	12	2	519	0.00385356
VPS10 domain-containing receptor SorCS1	4	1187	0.00336984	eukaryotic translation initiation factor 5B	10	2	1220	0.00163934
WASH complex subunit 2C	4	1312	0.00304878	saccharopine dehydrogenase-like oxidoreductase	8	2	429	0.004662
WASH complex subunit 2C	4	1290	0.00310078	RNA-binding motif protein, X-linked 2	15	2	322	0.00621118
WASH complex subunit 2C	4	1283	0.00311769	N-alpha-acetyltransferase 20	2	2	172	0.0116421
lipase member M	4	430	0.00930233	SH3 and multiple ankyrin repeat domains protein 1	1	2	2160.67	0.00092565
1-phosphatidylinositol 4,5-bisphosphate phosphodiesterase epsilon-1	4	2316	0.00172712	lariat debranching enzyme	5	2	544	0.00367647
WD repeat- and FYVE domain-containing protein 4	4	2435	0.00164271	headcase protein homolog	7	2	543	0.00368324
WD repeat- and FYVE domain-containing protein 4	4	2045	0.00195599	long-chain-fatty-acid--CoA ligase 5	4	2	705	0.00284002
WD repeat- and FYVE domain-containing protein 4	4	1654	0.00241838	scm-like with four MBT domains protein 1	4	2	866	0.00230947
disks large homolog 5	4	1860	0.00215054	centromere protein F	1	2	3094.33	0.000646395
disks large homolog 5	4	1829	0.00218699	cell cycle exit and neuronal differentiation protein 1	22	2	149	0.0134228
disks large homolog 5	4	1807	0.00221361	toll-like receptor 8	5	2	1054.5	0.00189674
disks large homolog 5	4	1680	0.00238095	spectrin beta chain, non-erythrocytic 5	10	2	3183.71	0.000648281
coiled-coil domain-containing protein 27	4	670	0.00597015	delta-like protein 3	3	2	602.5	0.0033217
coiled-coil domain-containing protein 17	4	678	0.00589971	ubl carboxyl-terminal hydrolase 18	13	2	335	0.00604388
coiled-coil domain-containing protein 17	4	655	0.00610687	myosin-IIIa	3	2	1486.92	0.00137511
coiled-coil domain-containing protein 17	4	402	0.00995025	dual oxidase 1	4	2	1452.75	0.00139314
homeodomain-interacting protein kinase 1	4	1170	0.0034188	NF-kappa-B-repressing factor	5	2	784	0.00255102
AT-hook DNA-binding motif-containing protein 1	4	1603	0.00249532	glutamate receptor ionotropic, delta-1	2	2	940.5	0.00213787
AT-hook DNA-binding motif-containing protein 1	4	1603	0.00249532	basic immunoglobulin-like variable motif-containing protein	4	2	503	0.00397614
AT-hook DNA-binding motif-containing protein 1	4	1603	0.00249532	UHRF1-binding protein 1	12	2	1440	0.00138889
enoyl-[acyl-carrier-protein] reductase, mitochondrial	4	459	0.0087146	histone-lysine N-methyltransferase NSD3	2	2	1041	0.00224628
enoyl-[acyl-carrier-protein] reductase, mitochondrial	4	431	0.00928074	ras-interacting protein 1	2	2	963	0.00207684
enoyl-[acyl-carrier-protein] reductase, mitochondrial	4	355	0.0112676	probable tRNA N6-adenosine threonylcarbamoyltransferase	3	2	335	0.00597015
enoyl-[acyl-carrier-protein] reductase, mitochondrial	4	355	0.0112676	KAT8 regulatory NSL complex subunit 2	3	2	492	0.00406504
enoyl-[acyl-carrier-protein] reductase, mitochondrial	4	355	0.0112676	vacuolar protein sorting-associated protein 13B	2	2	4009.5	0.00049882
enoyl-[acyl-carrier-protein] reductase, mitochondrial	4	355	0.0112676	pre-mRNA-processing factor 39	16	2	669	0.00298954
enoyl-[acyl-carrier-protein] reductase, mitochondrial	4	355	0.0112676	intraflagellar transport protein 57 homolog	2	2	429	0.004662
enoyl-[acyl-carrier-protein] reductase, mitochondrial	4	355	0.0112676	poly(A) RNA polymerase, mitochondrial	1	2	582	0.00343643
enoyl-[acyl-carrier-protein] reductase, mitochondrial	4	355	0.0112676	multidrug and toxin extrusion protein 1	3	2	570	0.00350877
enoyl-[acyl-carrier-protein] reductase, mitochondrial	4	355	0.0112676	PHD finger protein 10	21	2	497	0.00402416
glutamate receptor 4	4	884	0.00452489	proline-rich protein 11	21	2	360	0.00555556
glutamate receptor 4	4	732	0.00546448	FYVE, RhoGEF and PH domain-containing protein 6	11	2	1430	0.0013986
glutamate receptor 4	4	732	0.00546448	gamma-taxilin	5	2	498.75	0.00401445
histone-lysine N-methyltransferase 2A	4	3166	0.00126342	large subunit GTPase 1 homolog	13	2	579	0.00351976
dmX-like protein 1	4	3086	0.00129618	voltage-dependent calcium channel subunit alpha-2/delta-3	4	2	1091	0.00183318
dmX-like protein 1	4	3086	0.00129618	tyrosine-protein kinase STYK1	5	2	400	0.00509887
dmX-like protein 1	4	2913	0.00137315	thrombospondin type-1 domain-containing protein 1	6	2	825.5	0.00242527
dmX-like protein 1	4	2913	0.00137315	CTTNBP2 N-terminal-like protein	3	2	639	0.00312989
otoancorin	4	798	0.00501253	conserved oligomeric Golgi complex subunit 1	68	2	980	0.00204082
serine/threonine-protein kinase SMG1	4	3688	0.0010846	protocadherin gamma-A5	20	2	872	0.00230413
coiled-coil domain-containing protein 27	4	747	0.00535475	protocadherin gamma-B2	8	2	871	0.00230716
coiled-coil domain-containing protein 27	4	733	0.00545703	protocadherin gamma-C5	8	2	911	0.00219827
coiled-coil domain-containing protein 27	4	696	0.00574713	protocadherin beta-2	8	2	798	0.00250627
coiled-coil domain-containing protein 27	4	663	0.00603318	sialic acid synthase	3	2	259.4	0.00795065
coiled-coil domain-containing protein 27	4	629	0.0063593	ERBB receptor feedback inhibitor 1	5	2	430.5	0.00467304
coiled-coil domain-containing protein 17	4	669	0.00597907	RNA-binding protein 27	6	2	1019	0.00196563
coiled-coil domain-containing protein 17	4	646	0.00619195	ewing's tumor-associated antigen 1	3	2	906.667	0.00220638
coiled-coil domain-containing protein 17	4	645	0.00620155	ankyrin repeat and IBR domain-containing protein 1	1	2	1089	0.00183655
coiled-coil domain-containing protein 17	4	642	0.00623053	keratin, type I cytoskeletal 24	3	2	509.5	0.00392905
coiled-coil domain-containing protein 17	4	613	0.00652529	phospholipid-transporting ATPase ABCA7	7	2	1921.69	0.00106289
coiled-coil domain-containing protein 17	4	385	0.0103896	protein fem-1 homolog C	3	2	566	0.00359778
coiled-coil domain-containing protein 17	4	385	0.0103896	patatin-like phospholipase domain-containing protein 2	18	2	556.4	0.00361699
protein phosphatase 1 regulatory subunit 12B	4	1042	0.00383877	gamma-tubulin complex component 6	1	2	1819	0.00109951
protein phosphatase 1 regulatory subunit 12B	4	981	0.00407747	myogenesis-regulating glycosidase	12	2	714	0.00280112
protein phosphatase 1 regulatory subunit 12B	4	788	0.00507614	proline-rich protein 12	12	2	2036	0.000982318
enoyl-[acyl-carrier-protein] reductase, mitochondrial	4	355	0.0112676	exportin-5	2	2	1204	0.00166113
enoyl-[acyl-carrier-protein] reductase, mitochondrial	4	355	0.0112676	rho GTPase-activating protein 31	1	2	1382.67	0.00145068
pecanex-like protein 2	4	1934	0.00206825	VPS10 domain-containing receptor SorCS2	5	2	1167.5	0.00171311
dynein heavy chain 6, axonemal	4	4067	0.000983526	plexin-A4	11	2	1789.2	0.00113088
dynein heavy chain 6, axonemal	4	3737	0.00107038	uncharacterized protein KIAA1614	21	2	1190	0.00168067
dynein heavy chain 6, axonemal	4	3737	0.00107038	protocadherin beta-16	13	2	776	0.00257732
receptor tyrosine-protein kinase erbB-4	4	1349	0.00296516	zona pellucida sperm-binding protein 4	6	2	540	0.0037037
receptor tyrosine-protein kinase erbB-4	4	1334	0.0029985	PR domain zinc finger protein 13	5	2	707	0.00282885
receptor tyrosine-protein kinase erbB-4	4	1324	0.00302115	nuclear receptor subfamily 1 group D member 1	14	2	614	0.00325733
nebulin	4	8488	0.000471254	selenocysteine-specific elongation factor	13	2	544	0.00394124
nebulin	4	8463	0.000472646	heat shock-related 70 kDa protein 2	10	2	639	0.00312989
nebulin	4	8370	0.000477897	potassium channel subfamily K member 13	6	2	408	0.00490196
nebulin	4	8370	0.000477897	potassium channel subfamily K member 12	18	2	430	0.00465116
nebulin	4	8339	0.000479674	FK506-binding protein-like	46	2	349	0.00573066
nebulin	4	8308	0.000481464	doublesex- and mab-3-related transcription factor A1	5	2	504	0.00396825
nebulin	4	8277	0.000483267	xylosyltransferase 2	8	2	849	0.00235655
nebulin	4	8277	0.000483267	solute carrier family 13 member 1	22	2	501.286	0.00432986
nebulin	4	8184	0.000488759	transcription factor SOX-17	2	2	414	0.00483092
dedicator of cytokinesis protein 10	4	2245	0.00178174	nucleoredoxin	2	2	377	0.00538719
dedicator of cytokinesis protein 10	4	2236	0.00178891	CUB domain-containing protein 1	1	2	714	0.00315208
dedicator of cytokinesis protein 10	4	2232	0.00179211	zinc transporter 5	15	2	723	0.00277094
dedicator of cytokinesis protein 10	4	2230	0.00179372	coiled-coil domain-containing protein 71	7	2	467	0.00428266
dedicator of cytokinesis protein 10	4	2226	0.00179695	ubiquitin-conjugating enzyme E2 Z	5	2	354	0.00564972
dedicator of cytokinesis protein 10	4	2196	0.00182149	sister chromatid cohesion protein DCC1	5	2	370.5	0.00541809
dedicator of cytokinesis protein 10	4	2197	0.00182066	pancreatic progenitor cell differentiation and proliferation factor	1	2	114	0.0175439
girdin	4	2026	0.00197433	DDB1- and CUL4-associated factor 10	4	2	507.5	0.003963
girdin	4	2000	0.002	SH3 domain and tetratricopeptide repeat-containing protein 2	3	2	1288	0.0015528
girdin	4	1999	0.002001	importin-4	3	2	1081	0.00185014
girdin	4	1972	0.0020284	Bardet-Biedl syndrome 10 protein	5	2	723	0.00276625
girdin	4	1952	0.00204918	cation channel sperm-associated protein subunit beta	26	2	1116	0.00179211
baculoviral IAP repeat-containing protein 6	4	3983	0.00100427	sorting nexin-22	7	2	177.333	0.0113261
anaphase-promoting complex subunit 1	4	1921	0.00208225	gametogenetin-binding protein 2	7	2	678.2	0.00295068
anaphase-promoting complex subunit 1	4	1917	0.00208659	rho guanine nucleotide exchange factor 15	39	2	770.833	0.0027517
anaphase-promoting complex subunit 1	4	1473	0.00271555	CST complex subunit CTC1	7	2	1126.2	0.00179441
protein TANC1	4	1773	0.00225606	tubulin epsilon and delta complex protein 2	3	2	416.5	0.00480947
protein TANC1	4	1685	0.00237389	centrosomal protein of 290 kDa	6	2	2593.62	0.000774477
dynein heavy chain 12, axonemal	4	3816	0.00104822	RING finger protein 208	2	2	261	0.00766284
dynein heavy chain 12, axonemal	4	3460	0.00115607	transcriptional repressor scratch 1	1	2	314.5	0.00643228
palmitoyltransferase ZDHHC23	4	432	0.00925926	protein adenylyltransferase SelO, mitochondrial	1	2	669	0.00298954
palmitoyltransferase ZDHHC23	4	406	0.00985222	potassium voltage-gated channel subfamily A member 7	1	2	456	0.00438596
palmitoyltransferase ZDHHC23	4	409	0.00977995	ubiquitin carboxyl-terminal hydrolase 26	1	2	913	0.00219058
microtubule-associated protein 4	4	2310	0.0017316	mitochondrial ornithine transporter 2	1	2	301	0.00664452
microtubule-associated protein 4	4	2287	0.00174902	serine/threonine-protein kinase haspin	1	2	798	0.00250627
histone-lysine N-methyltransferase SETD5	4	1500	0.00266667	EMILIN-2	1	2	1053	0.00189934
histone-lysine N-methyltransferase SETD5	4	1481	0.00270088	ankyrin repeat domain-containing protein 27	2	2	984.667	0.00205048
histone-lysine N-methyltransferase SETD5	4	1468	0.0027248	centrosomal protein of 192 kDa	9	2	2263.29	0.000896337
histone-lysine N-methyltransferase SETD5	4	1468	0.0027248	mitogen-activated protein kinase kinase kinase 21	2	2	970.5	0.00207022
histone-lysine N-methyltransferase SETD5	4	1449	0.00276052	alpha-internexin	1	2	499	0.00400802
histone-lysine N-methyltransferase SETD5	4	1363	0.0029347	adhesion G protein-coupled receptor A2	5	2	1336	0.0014973
histone-lysine N-methyltransferase SETD5	4	1363	0.0029347	protein FAM83A	4	2	406	0.00494965
histone-lysine N-methyltransferase SETD5	4	1363	0.0029347	unconventional myosin-Ig	1	2	900.333	0.00224786
histone-lysine N-methyltransferase SETD5	4	1350	0.00296296	zinc finger protein 628	1	2	1057.67	0.00189096
histone-lysine N-methyltransferase SETD5	4	1350	0.00296296	BTB/POZ domain-containing protein 6	1	2	511.5	0.00392059
histone-lysine N-methyltransferase SETD5	4	1274	0.00313972	potassium voltage-gated channel subfamily H member 7	1	2	1053.71	0.00201645
la-related protein 1B	4	1143	0.00349956	caspase-7	5	2	336	0.00595238
la-related protein 1B	4	1115	0.00358744	182 kDa tankyrase-1-binding protein	1	2	1729	0.00115674
dmX-like protein 1	4	3020	0.0013245	ethanolaminephosphotransferase 1	2	2	397	0.00503778
dmX-like protein 1	4	3020	0.0013245	kelch-like protein 29	3	2	798.5	0.00259302
dmX-like protein 1	4	3020	0.0013245	mediator of RNA polymerase II transcription subunit 12-like protein	1	2	2059.11	0.000995741
dmX-like protein 1	4	3017	0.00132582	cation channel sperm-associated protein 1	2	2	780	0.0025641
dmX-like protein 1	4	2931	0.00136472	protein FAM167A	2	2	214	0.00934579
dmX-like protein 1	4	2913	0.00137315	N-alpha-acetyltransferase 15, NatA auxiliary subunit	2	2	865.5	0.0023108
PDZ domain-containing protein 2	4	2607	0.00153433	ATP-binding cassette sub-family A member 9	2	2	1556.12	0.00129823
PDZ domain-containing protein 2	4	2542	0.00157356	C-type lectin domain family 4 member D	5	2	187	0.0112906
little elongation complex subunit 1	4	1996	0.00200401	dynein light chain 2, cytoplasmic	1	2	89	0.0224719
glutamate receptor 1	4	846	0.00472813	neurensin-1	10	2	195	0.0102564
ciliogenesis and planar polarity effector 1	4	3188	0.00125471	zinc finger protein 280A	1	2	542	0.00369004
ciliogenesis and planar polarity effector 1	4	3188	0.00125471	esterase OVCA2	19	2	227	0.00881057
ciliogenesis and planar polarity effector 1	4	2920	0.00136986	suppressor of cytokine signaling 4	1	2	440	0.00454545
ciliogenesis and planar polarity effector 1	4	2855	0.00140105	serine/threonine-protein kinase Nek7	12	2	258	0.00815397
sodium-dependent proline transporter	4	754	0.00530504	spindlin interactor and repressor of chromatin-binding protein	1	2	357.714	0.0056234
sodium-dependent proline transporter	4	592	0.00675676	homeobox protein ARX	1	2	562	0.00355872
sodium-dependent proline transporter	4	592	0.00675676	alpha-ketoglutarate-dependent dioxygenase alkB homolog 3	4	2	286	0.00699301
sodium-dependent proline transporter	4	555	0.00720721	WD repeat-containing protein 36	1	2	895	0.00223464
slit homolog 3 protein	4	1460	0.00273973	gametocyte-specific factor 1	5	2	167	0.011976
centrosomal protein of 162 kDa	4	1365	0.0029304	dynein heavy chain domain-containing protein 1	12	2	4753	0.000420787
centrosomal protein of 162 kDa	4	1327	0.00301432	leucine-rich repeat-containing protein 45	6	2	670	0.00298507
laminin subunit alpha-2	4	3212	0.00124533	WD repeat-containing protein 90	1	2	1793	0.00111615
laminin subunit alpha-2	4	1916	0.00208768	ATP synthase mitochondrial F1 complex assembly factor 2	9	2	232	0.00903789
laminin subunit alpha-4	4	1816	0.00220264	oxysterol-binding protein-related protein 7	1	2	872	0.00229466
fibrocystin	4	3837	0.00104248	biorientation of chromosomes in cell division protein 1-like 1	2	2	3062.67	0.000653269
fibrocystin	4	2941	0.00136008	inositol polyphosphate multikinase	20	2	387.667	0.00522617
fibrocystin	4	2770	0.00144404	divergent protein kinase domain 1B	1	2	421.25	0.00481608
PH-interacting protein	4	1266	0.00315956	transmembrane protein 199	1	2	208	0.00961538
PH-interacting protein	4	1266	0.00315956	protein MROH8	3	2	744.333	0.00289367
NHS-like protein 1	4	1672	0.00239234	testis-specific expressed protein 55	1	2	536	0.00373134
NHS-like protein 1	4	1637	0.00244349	probable tRNA (uracil-O(2)-)-methyltransferase	2	2	619	0.00344216
NHS-like protein 1	4	1622	0.00246609	E3 ubiquitin-protein ligase SH3RF2	4	2	731.571	0.00273389
NHS-like protein 1	4	1592	0.00251256	oncoprotein-induced transcript 3 protein	1	2	545	0.00366972
DNA polymerase zeta catalytic subunit	4	2254	0.00177462	protein DENND6A	4	2	574.5	0.00349282
dystonin	4	7827	0.000511051	calcium uptake protein 2, mitochondrial	1	2	434	0.00460829
dystonin	4	7821	0.000511444	beta-taxilin	2	2	684	0.00292398
dystonin	4	7806	0.000512426	leucine-rich repeat-containing protein 57	4	2	235.667	0.00848751
dystonin	4	7797	0.000513018	NACHT, LRR and PYD domains-containing protein 5	1	2	1200	0.00166667
dystonin	4	7790	0.000513479	MAM domain-containing glycosylphosphatidylinositol anchor protein 1	3	2	963	0.00207697
dystonin	4	7766	0.000515066	cardiomyopathy-associated protein 5	1	2	4033	0.000495948
dystonin	4	7749	0.000516196	heparan sulfate glucosamine 3-O-sulfotransferase 5	1	2	346	0.00578035
dystonin	4	7718	0.000518269	adhesion G-protein coupled receptor F1	24	2	706.8	0.0028978
dystonin	4	7694	0.000519886	sal-like protein 3	4	2	1300	0.00153846
dystonin	4	7681	0.000520766	immunoglobulin superfamily member 22	5	2	1317.8	0.00151896
dystonin	4	7657	0.000522398	RING finger protein 175	3	2	273.25	0.00741366
ATP-binding cassette sub-family A member 13	4	4433	0.000902323	transcription elongation regulator 1-like protein	3	2	586	0.00341297
ATP-binding cassette sub-family A member 13	4	4396	0.000909918	homeobox protein SIX5	10	2	739	0.00270636
anillin	4	1138	0.00351494	protein S100-A7A	2	2	101	0.019802
anillin	4	1120	0.00357143	serine/threonine-protein kinase Nek8	1	2	692	0.00289017
anillin	4	1083	0.00369344	gasdermin-A	2	2	407.25	0.00504415
maltase-glucoamylase, intestinal	4	2753	0.00145296	signal-regulatory protein delta	7	2	197	0.0101523
fibrocystin-L	4	4253	0.000940513	integral membrane protein GPR180	1	2	440	0.00454545
fibrocystin-L	4	4215	0.000948992	zinc-activated ligand-gated ion channel	2	2	412	0.00485437
fibrocystin-L	4	4199	0.000952608	deuterosome assembly protein 1	1	2	567.5	0.00361894
fibrocystin-L	4	4152	0.000963391	BPI fold-containing family B member 4	6	2	614	0.00325733
RB1-inducible coiled-coil protein 1	4	1601	0.00249844	cilia- and flagella-associated protein 65	1	2	1862.06	0.00108087
RB1-inducible coiled-coil protein 1	4	1601	0.00249844	G protein-regulated inducer of neurite outgrowth 3	3	2	776	0.00257732
RB1-inducible coiled-coil protein 1	4	1598	0.00250313	polypeptide N-acetylgalactosaminyltransferase 10	1	2	603	0.00331675
RB1-inducible coiled-coil protein 1	4	1594	0.00250941	nik-related protein kinase	6	2	1548.6	0.00129181
RB1-inducible coiled-coil protein 1	4	1591	0.00251414	kinesin-like protein KIF7	8	2	1363.5	0.00146714
RB1-inducible coiled-coil protein 1	4	1591	0.00251414	acetyl-CoA carboxylase 1	5	2	2335.46	0.000856677
RB1-inducible coiled-coil protein 1	4	1549	0.00258231	sodium channel subunit beta-1	10	2	268	0.00746269
multiple PDZ domain protein	4	1461	0.00273785	DNA polymerase theta	3	2	2590	0.000772201
multiple PDZ domain protein	4	1167	0.00342759	transcription factor E2F7	3	2	862.333	0.00232466
proline rich transmembrane protein 1B	4	323	0.0123839	reprimo-like protein	3	2	120	0.0166667
sorbin and SH3 domain-containing protein 1	4	1168	0.00342466	putative C-_U-editing enzyme APOBEC-4	12	2	367	0.00544959
sorbin and SH3 domain-containing protein 1	4	1143	0.00349956	apical endosomal glycoprotein	1	2	1137	0.00175901
sorbin and SH3 domain-containing protein 1	4	1112	0.00359712	sperm-associated antigen 17	1	2	1740	0.0012019
sorbin and SH3 domain-containing protein 1	4	1111	0.00360036	septin-14	1	2	432	0.00462963
sorbin and SH3 domain-containing protein 1	4	1084	0.00369004	zinc finger protein 543	6	2	600	0.00333333
sorbin and SH3 domain-containing protein 1	4	1046	0.00382409	cytosolic phospholipase A2 zeta	3	2	849	0.00235571
sorbin and SH3 domain-containing protein 1	4	1043	0.00383509	tudor-interacting repair regulator protein	10	2	261	0.00766284
VPS10 domain-containing receptor SorCS1	4	1203	0.00332502	PDZ domain-containing protein GIPC3	2	2	1349	0.00148258
VPS10 domain-containing receptor SorCS1	4	1159	0.00345125	syntaxin-3	4	2	217	0.00967882
WASH complex subunit 2C	4	1300	0.00307692	adhesion G-protein coupled receptor D2	1	2	974	0.00205339
WASH complex subunit 2C	4	1288	0.00310559	angiotensin-converting enzyme	4	2	752	0.00265957
WASH complex subunit 2A	4	1300	0.00307692	SAFB-like transcription modulator	1	2	1079.57	0.00186359
WASH complex subunit 2A	4	1283	0.00311769	TBC1 domain family member 28	1	2	328.333	0.0061855
1-phosphatidylinositol 4,5-bisphosphate phosphodiesterase epsilon-1	4	2316	0.00172712	inositol polyphosphate 5-phosphatase K	3	2	313	0.00638978
1-phosphatidylinositol 4,5-bisphosphate phosphodiesterase epsilon-1	4	2316	0.00172712	protein FAM71E1	2	2	305.5	0.00665795
disks large homolog 5	4	1825	0.00219178	DNA-binding death effector domain-containing protein 2	2	2	256	0.0078125
disks large homolog 5	4	1809	0.00221117	DAZ-associated protein 1	7	2	509.286	0.00405225
protocadherin Fat 3	4	4612	0.000867303	probable tRNA methyltransferase 9B	1	2	539	0.00371058
protocadherin Fat 3	4	4612	0.000867303	helicase MOV-10	2	2	936	0.00213675
protocadherin Fat 3	4	4592	0.00087108	anaphase-promoting complex subunit 1-like	1	2	377	0.0089131
protocadherin Fat 3	4	4580	0.000873362	COMM domain-containing protein 5-like	4	2	273	0.00732601
protocadherin Fat 3	4	4395	0.000910125	uncharacterized protein LOC101060341	9	2	439	0.00455581
protocadherin Fat 3	4	3540	0.00112994	zinc transporter ZIP5	13	2	474	0.00421941
protocadherin Fat 3	4	3502	0.0011422	alpha-ketoglutarate-dependent dioxygenase alkB homolog 7, mitochondrial	2	2	273	0.00732601
protocadherin Fat 3	4	3502	0.0011422	uncharacterized protein LOC105372714	1	2	271	0.00738007
pleckstrin homology domain-containing family A member 7	4	1189	0.00336417	putative ubiquitin carboxyl-terminal hydrolase 41	2	2	336	0.00595238
pleckstrin homology domain-containing family A member 7	4	1149	0.00348129	putative POM121-like protein 1	2	2	462	0.004329
neuronal PAS domain-containing protein 4	4	879	0.00455063	equilibrative nucleoside transporter 2	1	2	430	0.00465116
neuronal PAS domain-containing protein 4	4	523	0.00764818	unconventional myosin-XV	7	2	2098	0.000953289
glutamate receptor 4	4	814	0.004914	zinc finger protein 232	2	2	171	0.0116959
glutamate receptor 4	4	771	0.00518807	islet cell autoantigen 1	1	1.97222	464.75	0.00433775
glutamate receptor 4	4	732	0.00546448	neuronal cell adhesion molecule	2	1.96907	1204.82	0.0016378
neuron navigator 2	4	2424	0.00165017	probable phospholipid-transporting ATPase IM	9	1.96552	1119.76	0.00177149
neuron navigator 2	4	2415	0.00165631	protein AF-10	14	1.96429	995.536	0.00198215
neuron navigator 2	4	2401	0.00166597	neurabin-1	3	1.96296	1244.52	0.00160188
neuron navigator 2	4	2343	0.00170721	zinc finger protein 536	11	1.96154	1353.73	0.00144998
neuron navigator 2	4	2343	0.00170721	centrosomal protein of 70 kDa	1	1.95833	512.417	0.00400083
neuron navigator 2	4	2143	0.00186654	plectin	5	1.95455	4503.59	0.000432439
protein MON2 homolog	4	1646	0.00243013	isoleucine--tRNA ligase, cytoplasmic	1	1.95238	1246.1	0.00156642
protein MON2 homolog	4	1646	0.00243013	dystrophin	1	1.94444	3226.28	0.00062526
protein MON2 homolog	4	1646	0.00243013	intraflagellar transport protein 122 homolog	2	1.94444	1131.67	0.00173413
phosphatidylinositol phosphatase PTPRQ	4	2536	0.00157729	tight junction protein ZO-2	5	1.9375	1139.81	0.00170158
phosphatidylinositol phosphatase PTPRQ	4	2533	0.00157916	nucleotide-binding oligomerization domain-containing protein 1	6	1.93333	904.067	0.00213503
neuron navigator 3	4	2378	0.00168209	transforming acidic coiled-coil-containing protein 2	1	1.93182	2163.3	0.000980601
neuron navigator 3	4	2364	0.00169205	coiled-coil domain-containing protein 150	1	1.92857	834.5	0.00247719
neuron navigator 3	4	2328	0.00171821	transmembrane channel-like protein 6	6	1.92857	732.929	0.0026616
neuron navigator 3	4	2305	0.00173536	protein TANC2	1	1.92857	1871.71	0.00104604
neuron navigator 3	4	2222	0.00180018	regulator of G-protein signaling protein-like	7	1.92308	968.154	0.00212776
neuron navigator 3	4	2208	0.00181159	inositol 1,4,5-triphosphate receptor associated 2	3	1.92308	494	0.00387978
neuron navigator 3	4	2179	0.0018357	M-phase phosphoprotein 9	1	1.92308	1073.31	0.00182563
neuron navigator 3	4	1885	0.00212202	tensin-3	1	1.91667	1455.42	0.00130953
neuron navigator 3	4	1842	0.00217155	cadherin-like protein 26	9	1.91667	823	0.00231789
neuron navigator 3	4	1722	0.00232288	attractin-like protein 1	1	1.91667	1143	0.00171181
neuron navigator 3	4	1708	0.00234192	ATP-dependent 6-phosphofructokinase, liver type	4	1.90909	774.273	0.00245335
neuron navigator 3	4	1700	0.00235294	scavenger receptor class B member 1	1	1.90909	491.273	0.00390432
E3 ubiquitin-protein ligase MYCBP2	4	4736	0.000844595	epidermal growth factor receptor kinase substrate 8-like protein 3	2	1.90909	572.727	0.00333964
E3 ubiquitin-protein ligase MYCBP2	4	4730	0.000845666	1-phosphatidylinositol 3-phosphate 5-kinase	5	1.90909	1961	0.000974381
E3 ubiquitin-protein ligase MYCBP2	4	4719	0.000847637	C3 and PZP-like alpha-2-macroglobulin domain-containing protein 8	1	1.90909	1788.91	0.00106023
E3 ubiquitin-protein ligase MYCBP2	4	4667	0.000857082	cytosolic phospholipase A2 gamma	2	1.9	447.2	0.00433959
E3 ubiquitin-protein ligase MYCBP2	4	4659	0.000858553	semaphorin-6C	4	1.9	921.1	0.00204692
E3 ubiquitin-protein ligase MYCBP2	4	4655	0.000859291	Fanconi anemia group M protein	3	1.9	1804.3	0.00106968
E3 ubiquitin-protein ligase MYCBP2	4	4642	0.000861698	multidrug resistance-associated protein 1	2	1.9	1442.9	0.00130819
E3 ubiquitin-protein ligase MYCBP2	4	4637	0.000862627	Krueppel-like factor 12	1	1.9	393.5	0.00484408
E3 ubiquitin-protein ligase MYCBP2	4	4619	0.000865988	vacuolar protein sorting-associated protein 8 homolog	5	1.89474	1162.42	0.00171785
E3 ubiquitin-protein ligase MYCBP2	4	4603	0.000868998	inaD-like protein	1	1.89474	1663.95	0.00115433
E3 ubiquitin-protein ligase MYCBP2	4	4600	0.000869565	zinc transporter ZIP10	6	1.88889	763.556	0.00247041
neurobeachin	4	2961	0.00135089	BAI1-associated protein 3	3	1.88889	1155.89	0.00163173
neurobeachin	4	2940	0.00136054	E3 ubiquitin-protein ligase RNF213	2	1.88889	4422.22	0.000476381
neurobeachin	4	2860	0.0013986	RNA-binding protein 5	6	1.88889	688.333	0.00283402
E3 ubiquitin-protein ligase HECTD1	4	2563	0.00156067	nuclear factor related to kappa-B-binding protein	1	1.88235	1212.47	0.00160863
E3 ubiquitin-protein ligase HECTD1	4	2561	0.00156189	fibroblast growth factor receptor 2	7	1.875	733.125	0.00256332
E3 ubiquitin-protein ligase HECTD1	4	2331	0.001716	tudor domain-containing protein 5	1	1.875	952.375	0.00196392
E3 ubiquitin-protein ligase HECTD1	4	2329	0.00171748	protein C12orf4	1	1.875	440.5	0.00435487
E3 ubiquitin-protein ligase HECTD1	4	2329	0.00171748	uncharacterized protein C2orf92	2	1.875	281.75	0.00679072
signal-induced proliferation-associated 1-like protein 1	4	1804	0.00221729	ubiquitin carboxyl-terminal hydrolase 40	2	1.875	1146.62	0.0016587
signal-induced proliferation-associated 1-like protein 1	4	1804	0.00221729	HEAT repeat-containing protein 5B	1	1.875	1949.88	0.000952663
signal-induced proliferation-associated 1-like protein 1	4	1804	0.00221729	speriolin	10	1.875	555.875	0.00335418
signal-induced proliferation-associated 1-like protein 1	4	1804	0.00221729	ATP-dependent 6-phosphofructokinase, platelet type	1	1.86667	714.533	0.00254747
signal-induced proliferation-associated 1-like protein 1	4	1804	0.00221729	collagen alpha-6(VI) chain	6	1.86667	2156.8	0.000860247
signal-induced proliferation-associated 1-like protein 1	4	1803	0.00221852	protein PAT1 homolog 2	11	1.86667	506.867	0.00372796
thyroid receptor-interacting protein 11	4	1744	0.00229358	FAST kinase domain-containing protein 1, mitochondrial	5	1.85714	800.286	0.00230097
thyroid receptor-interacting protein 11	4	1537	0.00260247	PGAP2-interacting protein	10	1.85714	661.857	0.00278043
kinetochore scaffold 1	4	2208	0.00181159	furin	7	1.85714	774	0.00237749
protein dispatched homolog 2	4	1401	0.0028551	antiviral innate immune response receptor RIG-I	3	1.85714	844.714	0.00219097
inositol hexakisphosphate and diphosphoinositol-pentakisphosphate kinase 1	4	1479	0.00270453	nuclear receptor subfamily 4 group A member 2	4	1.85714	580.143	0.00318619
inositol hexakisphosphate and diphosphoinositol-pentakisphosphate kinase 1	4	1479	0.00270453	lysine-specific demethylase 2A	3	1.85714	1033.14	0.00179604
inositol hexakisphosphate and diphosphoinositol-pentakisphosphate kinase 1	4	1479	0.00270453	alpha-2-macroglobulin-like protein 1	1	1.85714	1391	0.00132066
inositol hexakisphosphate and diphosphoinositol-pentakisphosphate kinase 1	4	1471	0.00271924	TBC1 domain family member 1	3	1.85	1108.75	0.00168532
inositol hexakisphosphate and diphosphoinositol-pentakisphosphate kinase 1	4	1458	0.00274348	protein broad-minded	3	1.85	1118.1	0.00166331
inositol hexakisphosphate and diphosphoinositol-pentakisphosphate kinase 1	4	1429	0.00279916	cortactin-binding protein 2	1	1.83333	1362.75	0.00135315
inositol hexakisphosphate and diphosphoinositol-pentakisphosphate kinase 1	4	1416	0.00282486	serine/threonine-protein phosphatase 2A regulatory subunit B'' subunit alpha	1	1.83333	909	0.00205846
inositol hexakisphosphate and diphosphoinositol-pentakisphosphate kinase 1	4	1408	0.00284091	echinoderm microtubule-associated protein-like 6	7	1.83333	1742.17	0.00109843
inositol hexakisphosphate and diphosphoinositol-pentakisphosphate kinase 1	4	1400	0.00285714	tax1-binding protein 1	3	1.83333	722.333	0.00251408
inositol hexakisphosphate and diphosphoinositol-pentakisphosphate kinase 1	4	1366	0.00292826	glutamate receptor-interacting protein 2	4	1.83333	961.167	0.00194474
NLR family CARD domain-containing protein 3	4	951	0.0042061	peripheral plasma membrane protein CASK	2	1.83333	876.333	0.00206822
serine/threonine-protein kinase SMG1	4	3663	0.001092	arf-GAP with SH3 domain, ANK repeat and PH domain-containing protein 2	1	1.83333	978.75	0.00187533
general transcription factor 3C polypeptide 1	4	2046	0.00195503	MAP7 domain-containing protein 3	1	1.83333	864.667	0.00211536
hydrocephalus-inducing protein homolog	4	5161	0.000775044	podocan	1	1.83333	584.333	0.00310094
putative short-chain dehydrogenase/reductase family 42E member 2	4	626	0.00638978	immunoglobulin-like domain-containing receptor 1	2	1.83333	485.167	0.00374147
putative short-chain dehydrogenase/reductase family 42E member 2	4	552	0.00724638	nucleoplasmin-2	3	1.83333	208.167	0.0088191
chromodomain-helicase-DNA-binding protein 3	4	2055	0.00194647	lactadherin	8	1.83333	350.667	0.00528809
chromodomain-helicase-DNA-binding protein 3	4	2050	0.00195122	adhesion G protein-coupled receptor L3	2	1.83333	1478.04	0.00122888
kinesin-like protein KIF19	4	1012	0.00395257	DENN domain-containing protein 4B	3	1.83333	1376.67	0.00137308
kinesin-like protein KIF19	4	1011	0.00395648	AT-rich interactive domain-containing protein 1B	3	1.83333	2171.33	0.000835665
kinesin-like protein KIF19	4	970	0.00412371	cilia- and flagella-associated protein 97	13	1.83333	518.833	0.00350075
kinesin-like protein KIF19	4	969	0.00412797	androgen-dependent TFPI-regulating protein	3	1.83333	217	0.00881095
kinesin-like protein KIF19	4	956	0.0041841	proprotein convertase subtilisin/kexin type 4	3	1.82353	635.471	0.00295874
kinesin-like protein KIF19	4	950	0.00421053	cation channel sperm-associated protein subunit delta	3	1.81818	726.273	0.00254237
kinesin-like protein KIF19	4	949	0.00421496	RNA helicase Mov10l1	1	1.8125	1041.75	0.00186407
kinesin-like protein KIF19	4	908	0.00440529	myocyte-specific enhancer factor 2C	1	1.80851	429.702	0.00420971
kinesin-like protein KIF19	4	907	0.00441014	epoxide hydrolase 1	10	1.8	424.4	0.00419719
ubiquitin carboxyl-terminal hydrolase 32	4	1558	0.00256739	laminin subunit beta-3	2	1.8	1159.2	0.00154569
nuclear receptor corepressor 1	4	2524	0.00158479	canalicular multispecific organic anion transporter 1	6	1.8	1112.2	0.00174326
nuclear receptor corepressor 1	4	2524	0.00158479	glutamate decarboxylase 1	2	1.8	503	0.00370996
nuclear receptor corepressor 1	4	2524	0.00158479	integral membrane protein 2C	5	1.8	237.8	0.0075957
nuclear receptor corepressor 1	4	2524	0.00158479	centrosomal protein of 78 kDa	4	1.8	691.3	0.00258369
nuclear receptor corepressor 1	4	2523	0.00158541	B-cell linker protein	6	1.8	394.6	0.00450984
nuclear receptor corepressor 1	4	2523	0.00158541	fas apoptotic inhibitory molecule 3	1	1.8	320.6	0.005668
nuclear receptor corepressor 1	4	2523	0.00158541	insulin-like growth factor 2 mRNA-binding protein 1	2	1.8	546.2	0.00335056
nuclear receptor corepressor 1	4	2515	0.00159046	zinc finger protein 229	26	1.8	747.8	0.00238107
nuclear receptor corepressor 1	4	2515	0.00159046	protein phosphatase Slingshot homolog 2	5	1.8	1256.47	0.00147286
nuclear receptor corepressor 1	4	2515	0.00159046	probable small intestine urate exporter	18	1.8	397.267	0.00455626
nuclear receptor corepressor 1	4	2515	0.00159046	podocin	16	1.8	294.4	0.00653128
nuclear receptor corepressor 1	4	2515	0.00159046	laminin subunit beta-4	6	1.8	1547.7	0.00116349
nuclear receptor corepressor 1	4	2515	0.00159046	fibrillin-3	1	1.8	2592.1	0.000686072
nuclear receptor corepressor 1	4	2514	0.00159109	serologically defined colon cancer antigen 8	22	1.8	578.55	0.00327829
nuclear receptor corepressor 1	4	2514	0.00159109	equilibrative nucleoside transporter 3	4	1.8	345.6	0.00532765
nuclear receptor corepressor 1	4	2514	0.00159109	phospholipid-transporting ATPase ID	4	1.8	1033.4	0.00185577
nuclear receptor corepressor 1	4	2514	0.00159109	dynein heavy chain 9, axonemal	27	1.8	4121.2	0.000432572
nuclear receptor corepressor 1	4	2514	0.00159109	proto-oncogene tyrosine-protein kinase ROS	15	1.8	2142.8	0.000831581
nuclear receptor corepressor 1	4	2514	0.00159109	thrombospondin-2	5	1.8	900.4	0.00217272
nuclear receptor corepressor 1	4	2465	0.00162272	nuclear export mediator factor NEMF	6	1.8	882.2	0.00218842
nuclear receptor corepressor 1	4	2456	0.00162866	separin	5	1.8	2017.4	0.000884498
nuclear receptor corepressor 1	4	2404	0.00166389	nephrocystin-4	2	1.8	1333.87	0.00135528
nuclear receptor corepressor 1	4	2347	0.0017043	sal-like protein 4	5	1.8	904.4	0.00196637
laminin subunit alpha-3	4	2626	0.00152323	protein CIP2A	20	1.8	778.4	0.00229526
FH1/FH2 domain-containing protein 3	4	1447	0.00276434	protein furry homolog	10	1.8	2587.6	0.000700303
pleckstrin homology domain-containing family G member 2	4	1374	0.00291121	dedicator of cytokinesis protein 11	1	1.8	1946.8	0.000910519
pleckstrin homology domain-containing family G member 2	4	1371	0.00291758	monocarboxylate transporter 12	12	1.8	501.8	0.00355021
coiled-coil domain-containing protein 97	4	428	0.00934579	treacle protein	8	1.78947	1358.68	0.0012986
nuclear receptor coactivator 6	4	2087	0.00191663	golgin subfamily A member 4	4	1.78947	2203.58	0.000806013
nuclear receptor coactivator 6	4	2087	0.00191663	transmembrane and coiled-coil domain-containing protein 3	6	1.78571	558.643	0.00306524
nuclear receptor coactivator 6	4	2086	0.00191755	coiled-coil domain-containing protein 88B	1	1.77778	1405	0.00131372
nuclear receptor coactivator 6	4	2082	0.00192123	MICOS complex subunit MIC60	5	1.77778	681.667	0.00257108
nuclear receptor coactivator 6	4	2058	0.00194363	semaphorin-4F	3	1.77778	639.889	0.00279469
nuclear receptor coactivator 6	4	2051	0.00195027	RUN and FYVE domain-containing protein 2	2	1.77778	554.333	0.00316008
nuclear receptor coactivator 6	4	1999	0.002001	voltage-dependent calcium channel subunit alpha-2/delta-1	8	1.76923	1029.46	0.00197693
nuclear receptor coactivator 6	4	1907	0.00209754	zinc finger Y-chromosomal protein	5	1.76923	720.154	0.00241948
nuclear receptor coactivator 6	4	1651	0.00242277	protein FAM13A	1	1.76923	822.538	0.00215673
nuclear receptor coactivator 6	4	1650	0.00242424	cilia- and flagella-associated protein 43	2	1.76923	1570.77	0.00115584
nuclear receptor-interacting protein 1	4	1158	0.00345423	ankyrin repeat domain-containing protein 13C	11	1.75	393.125	0.00424536
nuclear receptor-interacting protein 1	4	1158	0.00345423	lysosomal alpha-mannosidase	3	1.75	919.25	0.00187188
nuclear receptor-interacting protein 1	4	1158	0.00345423	serine protease inhibitor Kazal-type 5	1	1.75	1035	0.00170734
nuclear receptor-interacting protein 1	4	1158	0.00345423	tandem C2 domains nuclear protein	1	1.75	474	0.00364808
uromodulin-like 1	4	1342	0.00298063	peptidyl-prolyl cis-trans isomerase FKBP5	1	1.75	409.75	0.00421511
unconventional myosin-XVIIIb	4	2610	0.00153257	retinal dehydrogenase 2	1	1.75	479.25	0.00367695
unconventional myosin-XVIIIb	4	2610	0.00153257	phospholipid transfer protein	1	1.75	434.25	0.00402155
unconventional myosin-XVIIIb	4	2609	0.00153315	histone-lysine N-methyltransferase SETMAR	3	1.75	462.5	0.00382436
unconventional myosin-XVIIIb	4	2566	0.00155885	rho GTPase-activating protein 45	1	1.75	1046.38	0.00164492
protocadherin-11 X-linked	4	1345	0.00297398	116 kDa U5 small nuclear ribonucleoprotein component	2	1.75	960.75	0.00181537
protocadherin-11 X-linked	4	1376	0.00290698	glutamate receptor ionotropic, kainate 4	3	1.75	847.625	0.00204003
protocadherin-11 X-linked	4	1366	0.00292826	ral GTPase-activating protein subunit beta	1	1.75	1413.33	0.00123831
protocadherin-11 X-linked	4	1308	0.0030581	glutamate receptor ionotropic, kainate 5	1	1.75	862.917	0.00200495
protocadherin-11 X-linked	4	1339	0.0029873	ciliogenesis-associated TTC17-interacting protein	5	1.75	354	0.00487531
serine/threonine-protein kinase WNK3	4	1800	0.00222222	RAB11-binding protein RELCH	4	1.75	1070.42	0.0016219
serine/threonine-protein kinase WNK3	4	1800	0.00222222	cadherin-7	6	1.75	746.25	0.00230765
serine/threonine-protein kinase WNK3	4	1800	0.00222222	protein sel-1 homolog 1	3	1.75	659.75	0.00275563
serine/threonine-protein kinase WNK3	4	1800	0.00222222	ephrin type-A receptor 3	3	1.75	855.5	0.0020263
serine/threonine-protein kinase WNK3	4	1790	0.00223464	TBC1 domain family member 8B	2	1.75	961	0.00179852
protocadherin-11 Y-linked	4	1329	0.00300978	polyprenol reductase	1	1.75	267.75	0.00644306
protocadherin-11 Y-linked	4	1329	0.00300978	WAS/WASL-interacting protein family member 2	4	1.75	430.25	0.00403253
protocadherin-11 Y-linked	4	1329	0.00300978	Bardet-Biedl syndrome 7 protein	7	1.75	689.75	0.00252016
histone-lysine N-methyltransferase, H3 lysine-36 specific	4	2696	0.00148368	olfactomedin-like protein 2A	2	1.75	568.75	0.00302807
histone-lysine N-methyltransferase, H3 lysine-36 specific	4	2696	0.00148368	EF-hand calcium-binding domain-containing protein 4A	2	1.73913	538.391	0.00320956
histone-lysine N-methyltransferase, H3 lysine-36 specific	4	2696	0.00148368	regulating synaptic membrane exocytosis protein 2	3	1.72881	1432.66	0.00119492
histone-lysine N-methyltransferase, H3 lysine-36 specific	4	2696	0.00148368	ATP-binding cassette sub-family C member 8	12	1.72727	1424.82	0.0011926
histone-lysine N-methyltransferase, H3 lysine-36 specific	4	2556	0.00156495	coiled-coil domain-containing protein 157	4	1.72727	669.545	0.00263295
histone-lysine N-methyltransferase, H3 lysine-36 specific	4	2427	0.00164813	zinc finger CCCH domain-containing protein 14	1	1.72727	647.409	0.0027178
histone-lysine N-methyltransferase, H3 lysine-36 specific	4	2427	0.00164813	rho GTPase-activating protein 33	2	1.72727	1061.36	0.00160427
histone-lysine N-methyltransferase, H3 lysine-36 specific	4	2427	0.00164813	uncharacterized protein C3orf20	3	1.72727	777.273	0.00221064
histone-lysine N-methyltransferase, H3 lysine-36 specific	4	2344	0.00170648	forkhead box protein J3	17	1.72727	602.182	0.00286514
ciliogenesis and planar polarity effector 1	4	3188	0.00125471	PR domain-containing protein 11	2	1.72727	944.455	0.00185458
ciliogenesis and planar polarity effector 1	4	3145	0.00127186	E3 ubiquitin-protein ligase CBL-B	1	1.72414	863	0.00196571
ciliogenesis and planar polarity effector 1	4	3027	0.00132144	ADP-ribosylation factor-binding protein GGA1	6	1.72222	554.833	0.00308622
ciliogenesis and planar polarity effector 1	4	2920	0.00136986	isovaleryl-CoA dehydrogenase, mitochondrial	4	1.71429	429.214	0.00408927
sodium-dependent proline transporter	4	592	0.00675676	fer-1-like protein 6	1	1.71429	1680.43	0.00100853
glutamate receptor ionotropic, kainate 2	4	892	0.0044843	zinc finger protein castor homolog 1	2	1.71429	1642.71	0.00102436
glutamate receptor ionotropic, kainate 2	4	869	0.00460299	transcription factor 12	1	1.71429	634.75	0.00264973
AT-hook DNA-binding motif-containing protein 1	4	1603	0.00249532	transport and Golgi organization protein 1 homolog	1	1.71429	1803	0.000951802
NHS-like protein 1	4	1447	0.00276434	orphan sodium- and chloride-dependent neurotransmitter transporter NTT5	1	1.71429	724.571	0.00235518
maltase-glucoamylase, intestinal	4	1857	0.00215401	protein Shroom4	2	1.71429	1385	0.0012236
sorbin and SH3 domain-containing protein 1	4	1291	0.00309837	glutamine-rich protein 2	1	1.71429	1450.43	0.00127717
sorbin and SH3 domain-containing protein 1	4	1182	0.00338409	glucocorticoid receptor	1	1.70833	701.833	0.00241659
protein enabled homolog	4	1104	0.00362319	anoctamin-4	1	1.7	910.2	0.00182643
protein enabled homolog	4	1100	0.00363636	stromal membrane-associated protein 1	3	1.7	413.9	0.0042959
protein enabled homolog	4	1083	0.00369344	zinc finger homeobox protein 2	5	1.7	2270.8	0.000735544
protein enabled homolog	4	1081	0.00370028	mitogen-activated protein kinase kinase kinase 5	1	1.7	1389.1	0.00120979
protein enabled homolog	4	1079	0.00370714	kinesin-like protein KIF15	7	1.7	1269.9	0.00134768
protein enabled homolog	4	1060	0.00377358	neurexin 3	2	1.69444	1553.03	0.00108735
pleckstrin homology domain-containing family A member 7	4	1365	0.0029304	centriolin	2	1.68421	1936	0.000867467
pleckstrin homology domain-containing family A member 7	4	1364	0.00293255	prolyl 3-hydroxylase 2	1	1.66667	587.333	0.00267745
pleckstrin homology domain-containing family A member 7	4	1339	0.0029873	microsomal triglyceride transfer protein large subunit	4	1.66667	866.333	0.00190244
pleckstrin homology domain-containing family A member 7	4	1338	0.00298954	pendrin	2	1.66667	771.333	0.00215149
pleckstrin homology domain-containing family A member 7	4	1325	0.00301887	low-density lipoprotein receptor	1	1.66667	790.833	0.00206801
pleckstrin homology domain-containing family A member 7	4	1319	0.0030326	atrial natriuretic peptide receptor 1	6	1.66667	933.333	0.00189737
pleckstrin homology domain-containing family A member 7	4	1307	0.00306044	phosphatidylinositol 3,4,5-trisphosphate 5-phosphatase 1	2	1.66667	1012.67	0.00162615
pleckstrin homology domain-containing family A member 7	4	1298	0.00308166	RING finger protein 214	3	1.66667	651.333	0.00250491
pleckstrin homology domain-containing family A member 7	4	1272	0.00314465	E3 ubiquitin-protein ligase SH3RF3	1	1.66667	750.667	0.00236275
pleckstrin homology domain-containing family A member 7	4	1271	0.00314713	glucoside xylosyltransferase 1	2	1.66667	391.333	0.00417078
pleckstrin homology domain-containing family A member 7	4	1259	0.00317712	zona pellucida sperm-binding protein 3	2	1.66667	341	0.00483456
pleckstrin homology domain-containing family A member 7	4	1259	0.00317712	thiamine-triphosphatase	2	1.66667	158.333	0.0108351
pleckstrin homology domain-containing family A member 7	4	1259	0.00317712	C-type lectin domain family 12 member B	1	1.66667	205.667	0.0081519
pleckstrin homology domain-containing family A member 7	4	1259	0.00317712	desmoglein-4	5	1.66667	891	0.00185127
doublecortin domain-containing protein 1	4	1786	0.00223964	zinc finger protein 213	4	1.66667	401	0.00407446
doublecortin domain-containing protein 1	4	1786	0.00223964	polyadenylate-binding protein 4	8	1.66667	645	0.00257356
doublecortin domain-containing protein 1	4	1786	0.00223964	rab-like protein 6	3	1.66667	591	0.00288931
doublecortin domain-containing protein 1	4	1786	0.00223964	DNA polymerase epsilon subunit 2	1	1.66667	478.444	0.00351621
doublecortin domain-containing protein 1	4	1768	0.00226244	ectonucleoside triphosphate diphosphohydrolase 2	2	1.66667	453	0.00360957
doublecortin domain-containing protein 1	4	1741	0.00229753	transmembrane protein 249	8	1.66667	229	0.00720986
doublecortin domain-containing protein 1	4	1718	0.00232829	crooked neck-like protein 1	16	1.66667	790.333	0.00206881
doublecortin domain-containing protein 1	4	1686	0.00237248	disintegrin and metalloproteinase domain-containing protein 33	9	1.66667	654.133	0.00256525
doublecortin domain-containing protein 1	4	1546	0.00258732	golgin subfamily A member 8J	13	1.66667	566.667	0.00287425
doublecortin domain-containing protein 1	4	1501	0.00266489	spermatogenesis-associated serine-rich protein 2	3	1.66667	515	0.00317908
doublecortin domain-containing protein 1	4	1458	0.00274348	E3 ubiquitin-protein ligase RNF43	17	1.66667	783.667	0.00209727
neuron navigator 2	4	2424	0.00165017	ras-like protein family member 12	5	1.66667	224.333	0.00811036
neurobeachin	4	2505	0.00159681	zinc finger protein basonuclin-2	5	1.66667	988	0.00165777
protein AHNAK2	4	5695	0.000702371	nuclear pore complex protein Nup214	1	1.66667	1695.33	0.00100339
E3 ubiquitin-protein ligase HECTD1	4	2608	0.00153374	disintegrin and metalloproteinase domain-containing protein 18	3	1.66667	545.333	0.00366602
E3 ubiquitin-protein ligase HECTD1	4	2549	0.00156924	glutamine amidotransferase-like class 1 domain-containing protein 3A, mitochondrial	3	1.66667	229.167	0.0071877
signal-induced proliferation-associated 1-like protein 1	4	1804	0.00221729	rhomboid domain-containing protein 3	7	1.66667	343.5	0.00474567
signal-induced proliferation-associated 1-like protein 1	4	1803	0.00221852	signaling lymphocytic activation molecule	1	1.66667	291.5	0.00562269
signal-induced proliferation-associated 1-like protein 1	4	1783	0.00224341	glutamine amidotransferase-like class 1 domain-containing protein 3B, mitochondrial	1	1.66667	229	0.007132
signal-induced proliferation-associated 1-like protein 1	4	1783	0.00224341	V-set and immunoglobulin domain-containing protein 10-like 2	3	1.66667	537.333	0.00328725
signal-induced proliferation-associated 1-like protein 1	4	1755	0.0022792	OTU domain-containing protein 7A	6	1.66667	761.333	0.0022188
signal-induced proliferation-associated 1-like protein 1	4	1734	0.00230681	mitogen-activated protein kinase kinase kinase 7	6	1.66667	519.833	0.00316948
signal-induced proliferation-associated 1-like protein 1	4	1733	0.00230814	zinc finger protein 282	5	1.66667	602	0.00270555
protein FAM214A	4	1076	0.00371747	acidic fibroblast growth factor intracellular-binding protein	6	1.66667	322.667	0.00504844
serine/threonine-protein kinase SMG1	4	3611	0.00110773	short transient receptor potential channel 6	5	1.66667	874	0.00191459
serine/threonine-protein kinase SMG1	4	3611	0.00110773	protein transport protein Sec24C	4	1.66667	1097.17	0.00151476
caskin-1	4	1360	0.00294118	UPF0606 protein KIAA1549L	1	1.66667	1763.33	0.000982041
dynein heavy chain 2, axonemal	4	4531	0.000882807	vacuolar protein sorting-associated protein 41 homolog	1	1.66667	717.333	0.00229555
dynein heavy chain 2, axonemal	4	4531	0.000882807	ubiquitin-conjugating enzyme E2 J1	50	1.66667	277	0.00591296
dynein heavy chain 2, axonemal	4	4468	0.000895255	serine/arginine repetitive matrix protein 2	2	1.66667	1931.33	0.00163006
dynein heavy chain 2, axonemal	4	4449	0.000899078	nucleoporin p54	5	1.66667	479	0.00345657
calcium/calmodulin-dependent protein kinase kinase 1	4	312	0.0128205	chromatin-remodeling ATPase INO80	1	1.66667	1223.67	0.00143999
dynein heavy chain 17, axonemal	4	3510	0.0011396	paraneoplastic antigen-like protein 8A	1	1.66667	429	0.00381888
nuclear receptor corepressor 1	4	2523	0.00158541	protein transport protein Sec24A	1	1.66667	827.667	0.00206441
nuclear receptor corepressor 1	4	2515	0.00159046	cadherin-24	21	1.66667	703.333	0.0023212
nuclear receptor corepressor 1	4	2514	0.00159109	ran-binding protein 17	8	1.66667	875.333	0.00189134
transcription factor-like 5 protein	4	531	0.00753296	myotubularin-related protein 13	10	1.66667	1623.92	0.00100514
transcription factor-like 5 protein	4	468	0.00854701	kinesin-like protein KIF18A	1	1.66667	750	0.002219
transcription factor-like 5 protein	4	463	0.00863931	protocadherin-10	6	1.66667	997.667	0.00164377
transcription factor-like 5 protein	4	462	0.00865801	striatin-interacting protein 1	1	1.66667	780	0.00212177
transcription factor-like 5 protein	4	426	0.00938967	somatomedin-B and thrombospondin type-1 domain-containing protein	1	1.66667	207.667	0.00794872
transcription factor-like 5 protein	4	317	0.0126183	immunoglobulin-like domain-containing receptor 2	1	1.66667	535.222	0.00308373
helicase with zinc finger domain 2	4	2677	0.00149421	ranBP2-like and GRIP domain-containing protein 3	1	1.66667	1731	0.000966551
helicase with zinc finger domain 2	4	2674	0.00149589	uncharacterized protein LOC100506514	2	1.66667	406.333	0.00404339
protein TANC1	4	1678	0.00238379	CMP-N-acetylneuraminate-beta-1,4-galactoside alpha-2,3-sialyltransferase	4	1.65625	336.594	0.00545833
microtubule-associated protein 4	4	2326	0.00171969	probable tRNA N6-adenosine threonylcarbamoyltransferase, mitochondrial	7	1.65385	360.731	0.00448759
microtubule-associated protein 4	4	2295	0.00174292	transcription activator BRG1	1	1.65	1643.7	0.00100264
microtubule-associated protein 4	4	2294	0.00174368	R3H domain-containing protein 1	3	1.64103	1031.15	0.00158041
microtubule-associated protein 4	4	2280	0.00175439	transcription factor EC	3	1.63636	389.182	0.00419542
microtubule-associated protein 4	4	2254	0.00177462	choline transporter-like protein 3	2	1.63158	578.211	0.00282635
microtubule-associated protein 4	4	2253	0.00177541	U2 snRNP-associated SURP motif-containing protein	12	1.625	783.375	0.00199892
histone-lysine N-methyltransferase SETD5	4	1487	0.00268998	GRB2-associated-binding protein 4	13	1.625	420.375	0.00400051
histone-lysine N-methyltransferase SETD5	4	1379	0.00290065	leukocyte immunoglobulin-like receptor subfamily B member 5	5	1.625	611.875	0.0026394
homeodomain-interacting protein kinase 1	4	1210	0.00330579	lamin	15	1.625	584.125	0.00275092
fibroblast growth factor receptor-like 1	4	527	0.00759013	zinc finger SWIM domain-containing protein 4	4	1.625	1009.75	0.00163626
fibroblast growth factor receptor-like 1	4	504	0.00793651	phosphatidylinositol 3,4,5-trisphosphate 5-phosphatase 2	1	1.625	1288.75	0.00125795
alpha-2-macroglobulin	3	1474	0.00203528	supervillin	5	1.61905	2049.24	0.000794172
ankyrin-1	3	1880	0.00159574	probable phospholipid-transporting ATPase VB	1	1.61538	1166.31	0.00148001
copper-transporting ATPase 1	3	1500	0.002	zinc finger protein 285	2	1.6	529.4	0.00294549
breast cancer type 2 susceptibility protein	3	3418	0.000877706	very-long-chain enoyl-CoA reductase	4	1.6	309.2	0.00528885
lysosomal-trafficking regulator	3	3801	0.000789266	golgin subfamily A member 8T	1	1.6	551.8	0.00284177
collagen alpha-1(VII) chain	3	2944	0.00101902	signal recognition particle 54 kDa protein	4	1.6	462	0.00342172
fibrillin-1	3	2871	0.00104493	RNA polymerase II elongation factor ELL	1	1.6	434.6	0.00371826
gap junction alpha-1 protein	3	382	0.0078534	ribosome biogenesis protein BMS1 homolog	28	1.6	1187.2	0.00132973
glycine dehydrogenase (decarboxylating), mitochondrial	3	1020	0.00294118	dynamin-binding protein	4	1.6	1352.4	0.00116469
keratin, type I cytoskeletal 18	3	430	0.00697674	cadherin-19	1	1.6	565.8	0.00280176
peroxisome assembly protein 12	3	359	0.00835655	syntaxin-binding protein 4	1	1.6	455.6	0.00344664
phosphorylase b kinase regulatory subunit beta	3	1093	0.00274474	glycosyltransferase-like domain-containing protein 1	1	1.58228	406.405	0.00387367
polycystin-1	3	4302	0.00069735	protein sel-1 homolog 2	3	1.57895	548.263	0.00287482
elastin	3	724	0.00414365	gamma-tubulin complex component 3	5	1.57143	767.143	0.00208241
eosinophil peroxidase	3	715	0.0041958	endoplasmic reticulum membrane sensor NFE2L1	29	1.57143	754.429	0.00207157
nitric oxide synthase, endothelial	3	1203	0.00249377	tRNA (uracil-5-)-methyltransferase homolog A	12	1.57143	533.143	0.00295848
retinal dehydrogenase 1	3	501	0.00598802	SH2B adapter protein 2	6	1.57143	649.714	0.00241673
pancreatic alpha-amylase	3	511	0.00587084	probable methyltransferase TARBP1	5	1.57143	1281.14	0.00121645
glutamate receptor ionotropic, kainate 1	3	918	0.00326797	centrosomal protein of 164 kDa	2	1.5625	1741.84	0.000880915
glutamate receptor ionotropic, kainate 3	3	919	0.00326442	rhotekin	16	1.55556	486.222	0.00317005
glutamate receptor ionotropic, NMDA 2A	3	1464	0.00204918	exonuclease mut-7 homolog	13	1.55556	889.556	0.00226418
pyruvate carboxylase, mitochondrial	3	1178	0.00254669	SH2B adapter protein 3	11	1.55556	485.333	0.00316353
1-phosphatidylinositol 4,5-bisphosphate phosphodiesterase beta-3	3	1234	0.00243112	trophinin	14	1.55	1122.95	0.00138084
NADPH--cytochrome P450 reductase	3	680	0.00441176	synaptopodin	5	1.54545	956.818	0.0015981
plasma membrane calcium-transporting ATPase 1	3	1176	0.00255102	coiled-coil domain-containing protein 136	12	1.54545	1005.36	0.00158727
solute carrier family 35 member E4	3	350	0.00857143	DENN domain-containing protein 5B	3	1.53846	1140.62	0.00139953
protein DENND6B	3	585	0.00512821	exocyst complex component 7	1	1.53333	652.067	0.00255627
olfactory receptor 52N5	3	324	0.00925926	phosphatidate phosphatase LPIN3	2	1.53333	762.4	0.00201963
structural maintenance of chromosomes protein 4	3	1288	0.00232919	ATPase family AAA domain-containing protein 2B	1	1.52941	1218	0.00123339
HMG domain-containing protein 4	3	601	0.00499168	muscular LMNA-interacting protein	1	1.52941	750.647	0.00230304
erbin	3	1302	0.00230415	inositol polyphosphate 4-phosphatase type II	2	1.52632	834.211	0.00180408
PR domain zinc finger protein 2	3	1481	0.00202566	acyl-CoA-binding domain-containing protein 5	1	1.51111	487.933	0.00305186
40S ribosomal protein S13	3	151	0.0198675	uncharacterized protein C1orf112	1	1.5	633.071	0.0026937
alpha-amylase 1	3	511	0.00587084	cardiolipin synthase (CMP-forming)	1	1.5	205.75	0.00709714
alpha-amylase 1	3	511	0.00587084	coagulation factor VIII	3	1.5	1283.5	0.00274017
alpha-amylase 1	3	511	0.00587084	polycystin-2	7	1.5	819.25	0.00178322
coiled-coil domain-containing protein 73	3	1079	0.00278035	neutral and basic amino acid transport protein rBAT	3	1.5	624.5	0.00234638
desmoplakin	3	2272	0.00132042	tyrosinase	14	1.5	500	0.00295193
polycystin-1	3	4303	0.000697188	thrombopoietin	3	1.5	352.75	0.0042222
tetratricopeptide repeat protein 7B	3	843	0.00355872	nitric oxide synthase, brain	8	1.5	1274.5	0.00114465
putative transferase CAF17, mitochondrial	3	356	0.00842697	latent-transforming growth factor beta-binding protein 1	4	1.5	1566.36	0.000954172
sodium/bile acid cotransporter 5	3	438	0.00684932	progesterone receptor	2	1.5	686	0.00226402
DNA excision repair protein ERCC-6-like 2	3	701	0.0042796	IQ domain-containing protein H	1	1.5	597.5	0.0039499
potassium channel subfamily K member 2	3	422	0.007109	tudor domain-containing protein 10	6	1.5	313.938	0.0047605
potassium channel subfamily K member 2	3	426	0.00704225	septin-8	4	1.5	425.111	0.00349086
uncharacterized protein KIAA2026	3	2103	0.00142653	PTGES3L-AARSD1 protein	2	1.5	555.5	0.00265887
mitogen-activated protein kinase kinase kinase 19	3	1215	0.00246914	DNA repair protein RAD51 homolog 4	3	1.5	338	0.00439795
vacuolar protein sorting-associated protein 13C	3	3628	0.000826902	V-set and transmembrane domain-containing protein 2B	3	1.5	250.75	0.00584156
RANBP2-like and GRIP domain-containing protein 1	3	1748	0.00171625	active breakpoint cluster region-related protein	3	1.5	829.111	0.00185381
sodium/bile acid cotransporter 7	3	340	0.00882353	mothers against decapentaplegic homolog 7	3	1.5	325	0.00458543
phosphorylase b kinase regulatory subunit beta	3	1086	0.00276243	phospholipase D2	2	1.5	735	0.00219756
nucleolysin TIAR	3	392	0.00765306	coiled-coil domain-containing protein 40	7	1.5	907.5	0.00162085
polypeptide N-acetylgalactosaminyltransferase-like 6	3	601	0.00499168	peroxisomal membrane protein 11A	1	1.5	231.5	0.00665392
sorbin and SH3 domain-containing protein 1	3	1151	0.00260643	F-box only protein 38	2	1.5	943.6	0.00155259
sorbin and SH3 domain-containing protein 1	3	905	0.00331492	golgin subfamily A member 8M	10	1.5	563.3	0.00260715
sorbin and SH3 domain-containing protein 1	3	740	0.00405405	small integral membrane protein 23	1	1.5	156.25	0.00935502
maestro heat-like repeat-containing protein family member 7	3	1323	0.00226757	serine/threonine-protein kinase ULK4	4	1.5	906.5	0.00164103
zinc finger protein ZXDC	3	710	0.00422535	SWI/SNF complex subunit SMARCC2	9	1.5	1137.92	0.00132574
pyruvate carboxylase, mitochondrial	3	1178	0.00254669	folliculin-interacting protein 1	1	1.5	983.25	0.00185577
histone-lysine N-methyltransferase NSD2	3	1365	0.0021978	neuronal-specific septin-3	6	1.5	607	0.00256487
ribosomal oxygenase 2	3	465	0.00645161	myosin phosphatase Rho-interacting protein	2	1.5	1753.42	0.000872184
transmembrane protein 8B	3	924	0.00324675	homeobox protein Nkx-6.3	8	1.5	200	0.00747729
tumor necrosis factor receptor superfamily member 1A	3	455	0.00659341	DNA helicase MCM9	3	1.5	873.5	0.00169558
dual specificity protein phosphatase CDC14B	3	461	0.00650759	myeloblastin	1	1.5	231	0.00633343
RANBP2-like and GRIP domain-containing protein 2	3	1756	0.00170843	zinc finger protein 267	5	1.5	727	0.00204913
protein diaphanous homolog 1	3	1263	0.0023753	very long-chain acyl-CoA synthetase	1	1.5	593.5	0.00249474
cancer/testis antigen 47A	3	288	0.0104167	ribosomal RNA processing protein 1 homolog A	1	1.5	363	0.00403667
cancer/testis antigen 47A	3	288	0.0104167	phosphatidate cytidylyltransferase 2	1	1.5	393.25	0.00375503
cancer/testis antigen 47A	3	288	0.0104167	set1/Ash2 histone methyltransferase complex subunit ASH2	4	1.5	565.25	0.00259924
cancer/testis antigen 47A	3	288	0.0104167	nuclear pore complex protein Nup98	4	1.5	928.5	0.00161071
cancer/testis antigen 47A	3	288	0.0104167	mothers against decapentaplegic homolog 6	7	1.5	365.5	0.00414379
cancer/testis antigen 47A	3	288	0.0104167	valine--tRNA ligase	3	1.5	973.25	0.00152396
cancer/testis antigen 47A	3	288	0.0104167	mannosyl-oligosaccharide glucosidase	2	1.5	784	0.00187874
cancer/testis antigen 47A	3	288	0.0104167	ATPase family AAA domain-containing protein 2	7	1.5	1113	0.00131333
cancer/testis antigen 47A	3	288	0.0104167	arf-GAP with coiled-coil, ANK repeat and PH domain-containing protein 1	1	1.5	703	0.0021021
cancer/testis antigen 47A	3	288	0.0104167	rho GTPase-activating protein 11A	1	1.5	798	0.00208628
protein Daple	3	2028	0.00147929	peroxisomal sarcosine oxidase	1	1.5	342	0.00426478
teneurin-2	3	2535	0.00118343	pre-rRNA 2'-O-ribose RNA methyltransferase FTSJ3	9	1.5	653	0.00226996
calmodulin-regulated spectrin-associated protein 3	3	1276	0.0023511	oxysterol-binding protein-related protein 5	3	1.5	794.667	0.00187611
integrator complex subunit 1	3	2190	0.00136986	membrane transport protein XK	5	1.5	322	0.00475225
trinucleotide repeat-containing gene 18 protein	3	2968	0.00101078	condensin complex subunit 3	1	1.5	901.5	0.00161958
protein unc-13 homolog C	3	2214	0.00135501	RUS family member 1	7	1.5	356.5	0.00417757
elastin	3	677	0.00443131	methyltransferase-like protein 25	8	1.5	525	0.00282172
elastin	3	692	0.00433526	serine/threonine-protein kinase WNK4	1	1.5	1104.5	0.00132071
elastin	3	711	0.00421941	SAGA-associated factor 29	2	1.5	275.5	0.00535095
elastin	3	705	0.00425532	3-hydroxyisobutyrate dehydrogenase, mitochondrial	5	1.5	285.5	0.00510385
B-cell scaffold protein with ankyrin repeats	3	755	0.00397351	zinc finger CCHC domain-containing protein 24	4	1.5	206	0.00707335
ectonucleoside triphosphate diphosphohydrolase 1	3	517	0.00580271	zonadhesin	9	1.5	2475.25	0.000606511
histone deacetylase 7	3	954	0.00314465	von Willebrand factor A domain-containing protein 3A	3	1.5	955.875	0.00153576
RAS guanyl-releasing protein 2	3	609	0.00492611	kinesin light chain 3	4	1.5	603.5	0.00263202
RAS guanyl-releasing protein 2	3	609	0.00492611	E3 ubiquitin-protein ligase RNF166	1	1.5	268	0.00583265
exportin-7	3	1096	0.00273723	PML-RARA-regulated adapter molecule 1	3	1.5	689.5	0.00215759
sentrin-specific protease 6	3	1105	0.00271493	Hermansky-Pudlak syndrome 5 protein	1	1.5	1090.5	0.00137297
gamma-tubulin complex component 5	3	1024	0.00292969	hsp90 co-chaperone Cdc37	5	1.5	403.5	0.00365375
receptor-type tyrosine-protein phosphatase mu	3	1465	0.00204778	prostate androgen-regulated mucin-like protein 1	7	1.5	327.5	0.00451145
zinc finger FYVE domain-containing protein 16	3	1539	0.00194932	fatty acid desaturase 3	1	1.5	472.5	0.00313079
myb-binding protein 1A	3	1332	0.00225225	metalloproteinase inhibitor 1	4	1.5	234	0.00624688
filamin-A	3	2647	0.00113336	paxillin	1	1.48718	792.256	0.00189607
neuron navigator 2	3	1493	0.00200938	transcription factor SPT20 homolog	2	1.48485	792.061	0.00184461
tartrate-resistant acid phosphatase type 5	3	325	0.00923077	serine/threonine-protein kinase MARK2	11	1.47059	757.529	0.00192226
tartrate-resistant acid phosphatase type 5	3	325	0.00923077	arf-GAP with GTPase, ANK repeat and PH domain-containing protein 1	3	1.46667	956.8	0.00149302
tartrate-resistant acid phosphatase type 5	3	325	0.00923077	UDP-glucose:glycoprotein glucosyltransferase 2	5	1.46154	1304.46	0.00109737
centrosomal protein of 170 kDa protein B	3	1554	0.0019305	catenin alpha-1	3	1.45946	588.324	0.00254918
protein TASOR	3	1512	0.00198413	uncharacterized protein C1orf105	2	1.45455	154.727	0.0093888
homeodomain-interacting protein kinase 2	3	1171	0.00256191	DEP domain-containing protein 4	1	1.45455	420.818	0.00341911
teneurin-2	3	2765	0.00108499	calcium-dependent secretion activator 1	3	1.45098	1350.33	0.00107512
protein SET	3	290	0.0103448	death domain-containing protein 1	2	1.44444	787	0.00181546
N-acyl-phosphatidylethanolamine-hydrolyzing phospholipase D	3	393	0.00763359	E3 ubiquitin-protein ligase NEDD4	8	1.44444	1044.11	0.00134765
BCL-6 corepressor	3	1721	0.00174317	integrin beta-5	5	1.44444	709.444	0.00200967
BCL-6 corepressor	3	1703	0.0017616	band 4.1-like protein 4B	1	1.44444	844.889	0.00172345
BCL-6 corepressor	3	1755	0.0017094	nuclear valosin-containing protein-like	4	1.44444	802.611	0.0017844
DNA polymerase subunit gamma-1	3	1239	0.00242131	protein cordon-bleu	5	1.4375	1262.44	0.00113173
centrosomal protein of 55 kDa	3	464	0.00646552	dual specificity protein phosphatase CDC14B	8	1.43478	452.087	0.00321231
bifunctional UDP-N-acetylglucosamine 2-epimerase/N-acetylmannosamine kinase	3	753	0.00398406	X-ray radiation resistance-associated protein 1	8	1.43478	559.957	0.00261809
puratrophin-1	3	1191	0.00251889	ankyrin repeat and SOCS box protein 8	5	1.42857	212.571	0.00759619
puratrophin-1	3	1191	0.00251889	striated muscle preferentially expressed protein kinase	1	1.42857	2664.14	0.000526799
puratrophin-1	3	1191	0.00251889	echinoderm microtubule-associated protein-like 3	1	1.42857	937	0.0015224
leucine-rich repeat-containing protein 69	3	347	0.00864553	synergin gamma	1	1.42105	1292.37	0.00108959
Golgi-associated kinase 1A	3	575	0.00521739	serine/threonine-protein kinase WNK1	8	1.41667	2415.79	0.000573868
latent-transforming growth factor beta-binding protein 3	3	1303	0.00230238	centrosomal protein kizuna	4	1.41667	602.667	0.00235663
dysferlin	3	2081	0.00144161	sushi repeat-containing protein SRPX	3	1.4	422.2	0.00343575
apoptosis-inducing factor 1, mitochondrial	3	274	0.0109489	germ cell-specific gene 1 protein	12	1.4	335.75	0.00425755
dysferlin	3	2066	0.00145208	leucine-rich repeat and calponin homology domain-containing protein 1	1	1.4	679	0.00205394
dysferlin	3	2087	0.00143747	myocardin-related transcription factor A	4	1.4	961.4	0.0014403
dysferlin	3	2101	0.00142789	synaptopodin-2	1	1.4	963.2	0.00263175
dysferlin	3	2111	0.00142113	spastin	10	1.4	589.8	0.00234825
dysferlin	3	2097	0.00143062	cadherin EGF LAG seven-pass G-type receptor 1	4	1.4	2372.2	0.00057592
dysferlin	3	2118	0.00141643	interleukin-1 receptor-like 1	1	1.4	395.8	0.00360623
dysferlin	3	2112	0.00142045	plasma membrane calcium-transporting ATPase 3	1	1.4	1218.4	0.00115841
dysferlin	3	2102	0.00142721	inter-alpha-trypsin inhibitor heavy chain H5	10	1.4	813.2	0.00167301
dysferlin	3	2088	0.00143678	collagen alpha-2(XI) chain	4	1.4	1408.2	0.00139447
dysferlin	3	2098	0.00142993	protein crumbs homolog 2	1	1.4	1190.8	0.0011625
dysferlin	3	2067	0.00145138	OTU domain-containing protein 7B	5	1.4	791.9	0.00178708
dysferlin	3	2119	0.00141576	RANBP2-like and GRIP domain-containing protein 8	17	1.4	1704.8	0.000825002
glutamate receptor ionotropic, NMDA 2A	3	1464	0.00204918	neuronal acetylcholine receptor subunit alpha-7	3	1.375	437.75	0.00308083
glutamate receptor ionotropic, NMDA 2A	3	1281	0.00234192	kalirin	5	1.375	2101	0.000724933
genetic suppressor element 1	3	1113	0.00269542	platelet-derived growth factor receptor alpha	1	1.375	992.75	0.00148514
fibronectin type III domain-containing protein 3B	3	1204	0.00249169	CUGBP Elav-like family member 2	5	1.36765	447.235	0.00322125
arf-GAP with Rho-GAP domain, ANK repeat and PH domain-containing protein 1	3	1133	0.00264784	reticulon-3	2	1.36364	630.545	0.00335012
clathrin heavy chain linker domain-containing protein 1	3	464	0.00646552	ankyrin-3	8	1.36	3178.38	0.000443832
von Willebrand factor D and EGF domain-containing protein	3	1590	0.00188679	IQ domain-containing protein E	13	1.35714	632.857	0.00216131
polyunsaturated fatty acid lipoxygenase ALOX15	3	662	0.00453172	sorting nexin-19	1	1.35294	679.235	0.00223116
ankyrin-1	3	1897	0.00158144	calcium-activated potassium channel subunit alpha-1	9	1.35185	1198.31	0.00113241
protein phosphatase 1 regulatory subunit 12A	3	1030	0.00291262	RANBP2-like and GRIP domain-containing protein 5/6	1	1.35	1631.2	0.000841677
protein phosphatase 1 regulatory subunit 12A	3	943	0.00318134	O-phosphoseryl-tRNA(Sec) selenium transferase	3	1.33333	479.667	0.00270027
calpain-8	3	703	0.00426743	leptin receptor	1	1.33333	963.167	0.00139494
CTP synthase 2	3	586	0.00511945	cadherin-related family member 5	1	1.33333	692.667	0.00192009
dystonin	3	5675	0.000528634	interleukin-24	1	1.33333	164.667	0.00881838
protein shisa-7	3	538	0.00557621	clathrin interactor 1	13	1.33333	569.167	0.00230722
transmembrane channel-like protein 4	3	712	0.00421348	beta-alanine-activating enzyme	12	1.33333	954.083	0.00144363
protein FAM186A	3	2351	0.00127605	3'-5' RNA helicase YTHDC2	2	1.33333	1246.89	0.00107816
CD109 antigen	3	1428	0.00210084	tropomyosin alpha-4 chain	1	1.33333	278.667	0.00483498
CD109 antigen	3	1368	0.00219298	LIM domain-binding protein 3	1	1.33333	680.667	0.00194852
nitric oxide synthase, endothelial	3	596	0.00503356	[3-methyl-2-oxobutanoate dehydrogenase [lipoamide]] kinase, mitochondrial	5	1.33333	370.667	0.00352639
teneurin-1	3	2732	0.0010981	transmembrane protein 104	18	1.33333	373.5	0.00352089
teneurin-1	3	2731	0.0010985	junctophilin-3	20	1.33333	361.333	0.0049056
maestro heat-like repeat-containing protein family member 9	3	861	0.00348432	FERM domain-containing protein 1	1	1.33333	501.667	0.00263627
versican core protein	3	2409	0.00124533	protocadherin gamma-A11	31	1.33333	840.667	0.00159745
ectonucleoside triphosphate diphosphohydrolase 1	3	522	0.00574713	protein SON	38	1.33333	2279	0.000585006
ectonucleoside triphosphate diphosphohydrolase 1	3	402	0.00746269	ATP-dependent RNA helicase DQX1	1	1.33333	525.667	0.00249736
ectonucleoside triphosphate diphosphohydrolase 1	3	372	0.00806452	2',5'-phosphodiesterase 12	32	1.33333	533	0.00244441
ectonucleoside triphosphate diphosphohydrolase 1	3	372	0.00806452	glutaredoxin 2	16	1.33333	151	0.00877341
ankyrin repeat domain-containing protein 31	3	1873	0.00160171	mitochondrial import inner membrane translocase subunit TIM50	4	1.33333	311.333	0.00428821
mucin-12	3	5335	0.000562324	mitogen-activated protein kinase kinase kinase 1	4	1.33333	1412	0.000952404
immunoglobulin-like and fibronectin type III domain-containing protein 1	3	3708	0.000809061	WD repeat-containing protein 46	8	1.33333	528.667	0.00280585
1-phosphatidylinositol 4,5-bisphosphate phosphodiesterase epsilon-1	3	1994	0.00150451	ciliary neurotrophic factor receptor subunit alpha	3	1.33333	394.333	0.00331072
DNA excision repair protein ERCC-1	3	273	0.010989	oxysterol-binding protein-related protein 9	15	1.32143	622.143	0.00207133
extracellular matrix protein FRAS1	3	1976	0.00151822	RNA-binding motif, single-stranded-interacting protein 2	8	1.31579	404	0.00342706
carnosine synthase 1	3	950	0.00315789	ubiquitin carboxyl-terminal hydrolase 33	1	1.30769	831.692	0.00159886
valine--tRNA ligase, mitochondrial	3	1093	0.00274474	protein CLEC16A	7	1.3	890.9	0.00145492
protocadherin-11 X-linked	3	1065	0.0028169	protein ANKUB1	1	1.28571	421.429	0.00314431
[truncated: 36,884 more rows]

## Sheet: Bar graph
平均CommonSCSs	個数
１以上２未満	4816
２以上３未満	1152
３以上４未満	294
４以上５未満	98
５以上６未満	28
６以上７未満	7
７以上８未満	5
８以上９未満	1
９以上１０未満	2
18.8個	1
26個	1

## Sheet: isoform 1 cSCS
isoform1個	isoform数	平均CommonSCSs	平均アミノ酸数	平均CommonSCSs/1AA
very long-chain specific acyl-CoA dehydrogenase, mitochondrial	6	1	636.167	0.00157582
acetyl-CoA acetyltransferase, mitochondrial	10	1	338.8	0.0029758
serine/threonine-protein kinase receptor R3	4	1	480.5	0.00209638
glycogen debranching enzyme	7	1	1446.86	0.000710537
serine--pyruvate aminotransferase	1	1	392	0.00255102
delta-aminolevulinic acid dehydratase	3	1	330.333	0.00302858
ATP-binding cassette sub-family D member 1	1	1	745	0.00134228
AMP deaminase 1	2	1	761.5	0.00131367
adenomatous polyposis coli protein	15	1	2782.73	0.000359659
apolipoprotein A-I	3	1	267	0.00374532
tumor necrosis factor receptor superfamily member 6	6	1	303.833	0.00351325
arylsulfatase B	7	1	451.286	0.00224862
argininosuccinate synthase	5	1	426	0.00235121
serine-protein kinase ATM	11	1	2839.82	0.000363089
Bloom syndrome protein	7	1	1115.86	0.000940476
complement C2	4	1	650.25	0.00157553
complement component C8 beta chain	4	1	562.5	0.00178244
voltage-dependent L-type calcium channel subunit alpha-1S	2	1	1863.5	0.000536639
cystathionine beta-synthase	14	1	521.143	0.0019417
chloride channel protein 1	1	1	988	0.00101215
chloride channel protein ClC-Kb	2	1	602	0.00169492
collagen alpha-1(I) chain	4	1	1348.5	0.000747432
collagen alpha-3(IV) chain	4	1	1542.75	0.000656868
ceruloplasmin	7	1	1066.29	0.000938356
chloride anion exchanger	1	1	764	0.0013089
exostosin-1	1	1	746	0.00134048
coagulation factor XIII A chain	1	1	732	0.00136612
coagulation factor V	2	1	2155.5	0.000464398
coagulation factor IX	2	1	439.5	0.00228077
Fanconi anemia group C protein	10	1	463.5	0.00224158
high affinity immunoglobulin epsilon receptor subunit beta	5	1	228.4	0.00442157
fibroblast growth factor receptor 3	12	1	797.583	0.00125601
galactoside alpha-(1,2)-fucosyltransferase 1	3	1	365	0.00273973
galactokinase	2	1	392	0.00255102
1,4-alpha-glucan-branching enzyme	1	1	702	0.0014245
glucagon receptor	5	1	445.6	0.00227346
glycerol kinase	8	1	555.5	0.00180261
platelet glycoprotein Ib alpha chain	1	1	652	0.00153374
platelet glycoprotein IX	4	1	177	0.00564972
gelsolin	44	1	741.977	0.00134817
DNA mismatch repair protein Msh6	3	1	1327	0.000755737
retinal guanylyl cyclase 1	2	1	1103	0.000906618
porphobilinogen deaminase	10	1	331.4	0.00302865
integrin alpha-6	9	1	1010.44	0.000992938
integrin beta-2	4	1	734.5	0.00136448
integrin beta-3	1	1	788	0.00126904
integrin beta-4	12	1	1772.67	0.000572497
protein jagged-1	1	1	1218	0.000821018
anosmin-1	1	1	680	0.00147059
potassium voltage-gated channel subfamily A member 1	1	1	495	0.0020202
ATP-sensitive inward rectifier potassium channel 1	2	1	390	0.00256412
lysozyme C	1	1	148	0.00675676
hepatocyte growth factor receptor	6	1	1176.83	0.000882229
methionine synthase	3	1	1247.67	0.000801792
unconventional myosin-VIIa	17	1	2164.71	0.000466658
alpha-N-acetylgalactosaminidase	3	1	411	0.00243309
protein patched homolog 1	8	1	1356.62	0.000738753
nephrocystin-1	12	1	676.583	0.00150189
inositol polyphosphate 5-phosphatase OCRL	3	1	898.667	0.00111278
pyruvate dehydrogenase E1 component subunit alpha, somatic form, mitochondrial	5	1	394.2	0.00254477
peroxisomal biogenesis factor 7	2	1	304	0.00330237
ATP-dependent 6-phosphofructokinase, muscle type	27	1	811.111	0.00123749
pyruvate kinase PKLR	5	1	504	0.00202326
plasminogen	1	1	810	0.00123457
major prion protein	5	1	253	0.00395257
parathyroid hormone	2	1	131	0.00774919
ammonium transporter Rh type A	1	1	409	0.00244499
retinoid isomerohydrolase	2	1	487	0.00207187
band 3 anion transport protein	3	1	879.333	0.00113827
tyrosine aminotransferase	1	1	454	0.00220264
protein-glutamine gamma-glutamyltransferase K	1	1	817	0.00122399
uroporphyrinogen-III synthase	11	1	242.818	0.00429479
vitamin D3 receptor	8	1	444.5	0.00225657
tripeptidyl-peptidase 1	1	1	563	0.0017762
general transcription and DNA repair factor IIH helicase subunit XPD	4	1	654.5	0.00163454
exostosin-2	6	1	697.833	0.00146584
estradiol 17-beta-dehydrogenase 1	2	1	328.5	0.00304415
islet amyloid polypeptide	2	1	89	0.011236
interferon gamma receptor 1	1	1	489	0.00204499
integrin alpha-IIb	3	1	1014.67	0.00098583
keratin, type I cytoskeletal 17	1	1	432	0.00231481
keratin, type II cytoskeletal 2 epidermal	1	1	639	0.00156495
latent-transforming growth factor beta-binding protein 2	2	1	1757.5	0.000569734
S-adenosylmethionine synthase	2	1	395	0.00253165
platelet-activating factor acetylhydrolase IB subunit alpha	5	1	420.8	0.00237748
mevalonate kinase	6	1	377.5	0.00266007
sialidase-1	1	1	415	0.00240964
neuroendocrine convertase 1	2	1	729.5	0.00137223
phosphatidylcholine translocator ABCB4	11	1	1297.73	0.000774108
phosphate-regulating neutral endopeptidase PHEX	6	1	578.333	0.00182724
ileal sodium/bile acid cotransporter	1	1	348	0.00287356
hepatocyte nuclear factor 1-beta	8	1	480	0.00213803
angiopoietin-1 receptor	4	1	1102	0.000907787
thyroid hormone receptor beta	32	1	455.344	0.00219831
BRCA1-associated RING domain protein 1	6	1	540.333	0.00232559
nuclear receptor subfamily 0 group B member 1	1	1	470	0.00212766
albumin	1	1	609	0.00164204
apolipoprotein A-IV	1	1	396	0.00252525
apolipoprotein C-II	1	1	101	0.00990099
amyloid-beta	12	1	699.667	0.0014414
aquaporin-2	1	1	271	0.00369004
transcriptional regulator ATRX	9	1	2392.78	0.000421051
beta-crystallin B2	3	1	205	0.00487805
cytochrome P450 1A1	3	1	502.333	0.00199221
steroid 21-hydroxylase	2	1	495	0.0020202
eyes absent homolog 1	20	1	583.45	0.00172348
prothrombin	1	1	622	0.00160772
fibrinogen alpha chain	2	1	755	0.00135376
N-acetylgalactosamine-6-sulfatase	8	1	494	0.00209086
keratin, type I cytoskeletal 14	1	1	472	0.00211864
PMS1 protein homolog 1	25	1	826.84	0.00122588
antigen peptide transporter 2	3	1	680.667	0.00147053
thyroid peroxidase	16	1	894.375	0.00112306
tuberin	19	1	1742.74	0.000576334
5,6-dihydroxyindole-2-carboxylic acid oxidase	1	1	537	0.0018622
Werner syndrome ATP-dependent helicase	3	1	1399.67	0.000714761
low affinity immunoglobulin gamma Fc region receptor III-A	8	1	269.125	0.00376368
interleukin-10	2	1	135.5	0.00818533
interleukin-9	1	1	144	0.00694444
monocyte differentiation antigen CD14	4	1	375	0.00266667
lymphotoxin-alpha	6	1	205	0.00487805
insulin-like growth factor-binding protein 1	1	1	259	0.003861
alpha-1-acid glycoprotein 1	1	1	201	0.00497512
T-cell surface glycoprotein CD4	4	1	399.5	0.00260811
natural resistance-associated macrophage protein 2	14	1	565	0.00177348
5-hydroxytryptamine receptor 2A	2	1	471	0.00212314
nitric oxide synthase, inducible	1	1	1153	0.000867303
integrin alpha-M	5	1	891.4	0.00121298
DNA-binding protein RFX2	4	1	696.5	0.00143658
complement receptor type 1	1	1	2489	0.000401768
acetylcholinesterase	7	1	633.429	0.00158206
alpha-2C adrenergic receptor	1	1	462	0.0021645
adenosylhomocysteinase	13	1	412.154	0.00244656
aldehyde dehydrogenase, mitochondrial	2	1	493.5	0.00203095
aldehyde dehydrogenase X, mitochondrial	2	1	517	0.00193424
sodium/potassium-transporting ATPase subunit alpha-2	1	1	1020	0.000980392
potassium-transporting ATPase alpha chain 1	1	1	1035	0.000966184
B1 bradykinin receptor	2	1	353	0.00283286
C4b-binding protein beta chain	8	1	248.5	0.00402881
voltage-dependent N-type calcium channel subunit alpha-1B	2	1	2288	0.00043728
calcitonin gene-related peptide 2	1	1	127	0.00787402
glycoprotein hormones alpha chain	2	1	131.5	0.00771171
neuronal acetylcholine receptor subunit alpha-4	1	1	627	0.0015949
neuronal acetylcholine receptor subunit beta-4	11	1	451.091	0.00225045
macrophage colony-stimulating factor 1	5	1	463	0.00234976
granulocyte colony-stimulating factor	4	1	187.5	0.0053833
granulocyte colony-stimulating factor receptor	7	1	843.571	0.00118675
cytochrome P450 1A2	1	1	516	0.00193798
cytochrome P450 2A6	1	1	494	0.00202429
cytochrome P450 2A7	1	1	494	0.00202429
cytochrome P450 3A7	1	1	503	0.00198807
cytochrome P450 2A13	1	1	494	0.00202429
cytochrome P450 2E1	1	1	493	0.0020284
cytochrome P450 2J2	1	1	502	0.00199203
cytochrome P450 3A5	3	1	461	0.00219842
cytochrome P450 4B1	7	1	429.857	0.00243651
sterol 26-hydroxylase, mitochondrial	2	1	461	0.00222039
lanosterol 14-alpha demethylase	2	1	456.5	0.00221994
type II iodothyronine deiodinase	4	1	267	0.00374594
D(2) dopamine receptor	3	1	433.333	0.00231004
D(3) dopamine receptor	5	1	393.4	0.00254496
D(1B) dopamine receptor	1	1	477	0.00209644
erythropoietin	1	1	193	0.00518135
gamma-aminobutyric acid receptor subunit alpha-2	16	1	472	0.00213511
gamma-aminobutyric acid receptor subunit alpha-6	1	1	453	0.00220751
glutamate receptor ionotropic, NMDA 1	9	1	918.667	0.00108924
glutamate receptor ionotropic, NMDA 2B	3	1	1484	0.000673854
glutamate receptor ionotropic, NMDA 2C	10	1	1218	0.000842496
protein lifeguard 1	2	1	371	0.00269542
metabotropic glutamate receptor 3	3	1	631.667	0.00169585
metabotropic glutamate receptor 4	6	1	783.167	0.00129901
metabotropic glutamate receptor 6	1	1	877	0.00114025
metabotropic glutamate receptor 7	10	1	637.2	0.00167165
glutathione S-transferase P	1	1	210	0.0047619
glutathione S-transferase theta-2	1	1	244	0.00409836
guanylate cyclase soluble subunit alpha-1	21	1	629.524	0.00163256
histamine H1 receptor	4	1	487	0.00205339
5-hydroxytryptamine receptor 1B	1	1	390	0.0025641
5-hydroxytryptamine receptor 1D	1	1	377	0.00265252
5-hydroxytryptamine receptor 1F	6	1	366	0.00273224
5-hydroxytryptamine receptor 2B	4	1	434.5	0.00232808
inosine-5'-monophosphate dehydrogenase 2	4	1	566	0.00177361
integrin alpha-X	5	1	911.4	0.00116542
integrin beta-7	4	1	794	0.00125954
inward rectifier potassium channel 2	1	1	427	0.00234192
lutropin subunit beta	1	1	141	0.0070922
kit ligand	2	1	259	0.00387232
neuropeptide Y receptor type 1	3	1	384	0.00260417
neuropeptide Y receptor type 2	3	1	381	0.00262467
nociceptin receptor	11	1	365	0.00275854
cAMP-specific 3',5'-cyclic phosphodiesterase 4C	5	1	663.2	0.00151598
DNA-directed RNA polymerase II subunit RPB1	1	1	1970	0.000507614
serum paraoxonase/lactonase 3	1	1	354	0.00282486
peptidyl-prolyl cis-trans isomerase C	1	1	212	0.00471698
prolactin	4	1	227.5	0.00439563
prostaglandin D2 receptor	3	1	338	0.00298314
prostaglandin E2 receptor EP1 subtype	1	1	402	0.00248756
prostaglandin E2 receptor EP2 subtype	1	1	358	0.0027933
prostaglandin G/H synthase 2	1	1	604	0.00165563
60S ribosomal protein L3	2	1	378.5	0.00265312
60S ribosomal protein L18	2	1	173.5	0.00580423
60S ribosomal protein L23a	1	1	156	0.00641026
60S ribosomal protein L31	3	1	124.667	0.00802565
40S ribosomal protein S3	3	1	248.333	0.00403049
intersectin-1	21	1	1415	0.00073491
serine protease 58	1	1	241	0.00414938
receptor expression-enhancing protein 3	3	1	186.333	0.00569315
plasma membrane calcium-transporting ATPase 4	4	1	1175.75	0.000850697
18S rRNA aminocarboxypropyltransferase	1	1	312	0.00320513
golgin subfamily A member 6-like protein 1	2	1	679.5	0.00147209
nuclear receptor ROR-gamma	3	1	555.333	0.00182622
N-acetylgalactosamine kinase	16	1	427	0.00235202
growth/differentiation factor 6	1	1	455	0.0021978
mediator of RNA polymerase II transcription subunit 8	3	1	249.333	0.0042134
olfactory receptor 2Y1	1	1	311	0.00321543
SH3 domain-binding glutamic acid-rich protein	3	1	144	0.00710227
BH3-like motif-containing cell death inducer	1	1	108	0.00925926
serine/threonine-protein kinase pim-3	1	1	326	0.00306748
variable charge X-linked protein 3B	1	1	246	0.00406504
runt-related transcription factor 1	10	1	412.3	0.00254786
E3 ubiquitin-protein ligase TTC3	25	1	1890.84	0.000538028
olfactory receptor 52N1	1	1	320	0.003125
olfactory receptor 4C15	1	1	316	0.00316456
olfactory receptor 5C1	1	1	320	0.003125
microtubule-associated tumor suppressor 1	11	1	1249	0.000805728
actin filament-associated protein 1-like 2	25	1	831.08	0.00120692
olfactory receptor 4C13	1	1	309	0.00323625
olfactory receptor 13C3	1	1	347	0.00288184
olfactory receptor 2L8	1	1	312	0.00320513
olfactory receptor 4D5	1	1	318	0.00314465
neuronal membrane glycoprotein M6-b	8	1	287	0.00351107
GMP reductase 2	12	1	357	0.00283385
tRNA pseudouridine synthase A	4	1	360.25	0.00299602
claudin-18	2	1	261	0.00383142
ATP synthase F(0) complex subunit C1, mitochondrial	2	1	136	0.00735294
complement C4-B	1	1	1744	0.000573394
ATP synthase F(0) complex subunit C2, mitochondrial	10	1	145.9	0.00701533
ATP synthase F(0) complex subunit C3, mitochondrial	3	1	129.667	0.00786944
exosome complex component RRP40	2	1	219.5	0.00486696
low affinity immunoglobulin gamma Fc region receptor II-b	14	1	289.857	0.00347269
dimethylaniline monooxygenase [N-oxide-forming] 3	6	1	473.333	0.0022219
multiple C2 and transmembrane domain-containing protein 1	19	1	727.579	0.00139151
rab11 family-interacting protein 1	2	1	1229	0.000815244
zinc finger protein 787	2	1	382	0.0026178
phosphatidylinositol 4,5-bisphosphate 5-phosphatase A	8	1	729.5	0.00141958
BTB/POZ domain-containing protein 7	3	1	891.333	0.00140194
G patch domain-containing protein 8	20	1	1440.7	0.000694811
olfactory receptor 8D1	1	1	308	0.00324675
olfactory receptor 8D2	1	1	311	0.00321543
tumor protein D53	5	1	190.8	0.00527016
mothers against decapentaplegic homolog 2	13	1	428.769	0.00241585
protein stum homolog	2	1	139.5	0.00716929
calcium/calmodulin-dependent 3',5'-cyclic nucleotide phosphodiesterase 1A	19	1	543.474	0.00184206
zinc finger matrin-type protein 5	3	1	170	0.00588235
nucleoporin GLE1	8	1	699.5	0.00143037
protein EVI2A	2	1	247.5	0.00404915
bcl-2-modifying factor	2	1	184	0.00543478
G protein-coupled receptor kinase 4	18	1	478.333	0.00219995
olfactory receptor 8J3	1	1	315	0.0031746
zinc finger protein 813	1	1	617	0.00162075
Fc receptor-like protein 6	10	1	411.7	0.00243912
factor in the germline alpha	1	1	219	0.00456621
keratin-associated protein 5-2	1	1	177	0.00564972
probable G-protein coupled receptor 179	1	1	2367	0.000422476
protein zyg-11 homolog A	10	1	639.5	0.00160428
tripartite motif-containing protein 67	3	1	806	0.00124284
probable bifunctional methylenetetrahydrofolate dehydrogenase/cyclohydrolase 2	18	1	313.111	0.00336901
ankyrin repeat domain-containing protein 34B	4	1	514	0.00194553
olfactory receptor 1L6	1	1	311	0.00321543
olfactory receptor 1N2	1	1	316	0.00316456
olfactory receptor 10A2	1	1	303	0.00330033
alpha-2,8-sialyltransferase 8F	8	1	281	0.00369018
olfactory receptor 10Q1	1	1	319	0.0031348
olfactory receptor 10T2	1	1	314	0.00318471
olfactory receptor 2L2	3	1	312	0.00320513
olfactory receptor 2L3	1	1	312	0.00320513
olfactory receptor 2M5	1	1	312	0.00320513
olfactory receptor 2T10	1	1	312	0.00320513
olfactory receptor 4D9	1	1	314	0.00318471
olfactory receptor 1I1	1	1	355	0.0028169
olfactory receptor 4K17	1	1	315	0.0031746
cytoplasmic protein NCK2	7	1	380	0.00263158
olfactory receptor 5AN1	1	1	311	0.00321543
olfactory receptor 5AU1	1	1	311	0.00321543
olfactory receptor 5B12	1	1	314	0.00318471
olfactory receptor 14I1	1	1	311	0.00321543
olfactory receptor 5L2	1	1	311	0.00321543
olfactory receptor 5M9	1	1	310	0.00322581
olfactory receptor 5T2	1	1	359	0.00278552
olfactory receptor 52E2	1	1	325	0.00307692
olfactory receptor 52E4	1	1	312	0.00320513
olfactory receptor 7D4	1	1	312	0.00320513
olfactory receptor 8A1	1	1	309	0.00323625
olfactory receptor 8B4	1	1	309	0.00323625
olfactory receptor 8D4	1	1	314	0.00318471
olfactory receptor 8K3	1	1	312	0.00320513
E3 ubiquitin-protein ligase TRIM37	21	1	955.476	0.00104748
olfactory receptor 9Q1	1	1	310	0.00322581
leucine-rich repeat-containing protein 52	1	1	313	0.00319489
olfactory receptor 1L4	1	1	311	0.00321543
olfactory receptor 1L1	1	1	310	0.00322581
olfactory receptor 4C12	1	1	309	0.00323625
olfactory receptor 4A5	1	1	315	0.0031746
olfactory receptor 9Q2	1	1	314	0.00318471
olfactory receptor 6F1	1	1	308	0.00324675
olfactory receptor 10V1	1	1	309	0.00323625
olfactory receptor 4F6	1	1	312	0.00320513
melanoma-associated antigen D1	7	1	786	0.00127302
dynamin-1	6	1	858	0.00116558
transmembrane glycoprotein NMB	6	1	556.833	0.00179993
dynamin-2	5	1	868.2	0.00115181
protein tweety homolog 1	3	1	453.667	0.00220448
keratin-associated protein 5-11	1	1	156	0.00641026
neuralized-like protein 4	2	1	1561	0.000640615
beta-1,4-galactosyltransferase 2	5	1	377.8	0.00264929
plakophilin-4	21	1	1125.76	0.000898861
olfactory receptor 5H6	1	1	309	0.00323625
olfactory receptor 4K15	1	1	348	0.00287356
olfactory receptor 13G1	1	1	307	0.00325733
olfactory receptor 10AG1	1	1	301	0.00332226
carboxypeptidase M	3	1	443	0.00225734
olfactory receptor 5K4	1	1	321	0.00311526
olfactory receptor 5B2	1	1	309	0.00323625
zinc finger protein 780B	14	1	801.714	0.00125544
receptor tyrosine-protein kinase erbB-2	33	1	1184.55	0.000863337
inositol hexakisphosphate kinase 2	34	1	411.882	0.00244255
semaphorin-3B	4	1	750	0.00133335
keratin-associated protein 5-1	1	1	278	0.00359712
leucine-rich repeat-containing protein 37A2	13	1	1443.46	0.000735327
tetraspanin-17	4	1	319.75	0.00316769
transcription elongation factor A protein-like 1	3	1	159	0.00628931
protein FAM149A	5	1	537.8	0.0019236
WD repeat-containing protein 35	3	1	1032.33	0.00101397
ribosomal protein S6 kinase alpha-1	4	1	710.25	0.00141267
ribosomal protein S6 kinase alpha-2	6	1	712	0.00141245
atrophin-1	2	1	1190	0.000840336
zinc finger and SCAN domain-containing protein 2	7	1	359.429	0.00426752
zinc finger protein 182	3	1	632.667	0.00158093
non-specific lipid-transfer protein	7	1	446.143	0.00231888
NT-3 growth factor receptor	29	1	672.034	0.00154511
pancreatic progenitor cell differentiation and proliferation factor-like protein	4	1	83.25	0.012015
rho GTPase-activating protein 25	14	1	599.429	0.00172656
immunoglobulin superfamily member 3	5	1	1208	0.000827868
interferon-related developmental regulator 1	4	1	426	0.00235553
E3 ubiquitin-protein ligase TRIM13	4	1	407.75	0.00245251
hematopoietic cell signal transducer	2	1	92.5	0.0108111
transient receptor potential cation channel subfamily M member 3	10	1	1345.9	0.00114133
40-kDa huntingtin-associated protein	3	1	371	0.00269542
NACHT domain- and WD repeat-containing protein 1	11	1	1380.45	0.000734315
CMT1A duplicated region transcript 15 protein	2	1	155	0.00675794
protein phosphatase 1 regulatory subunit 27	1	1	154	0.00649351
complement C1q and tumor necrosis factor-related protein 9B	1	1	333	0.003003
cadherin-related family member 4	9	1	773.111	0.00131224
cancer/testis antigen family 45 member A5	3	1	189	0.00529101
cold shock domain-containing protein E1	6	1	797.833	0.00125478
stabilizer of axonemal microtubules 2	3	1	200	0.00743818
tripartite motif-containing protein 72	1	1	477	0.00209644
CDGSH iron-sulfur domain-containing protein 2	1	1	135	0.00740741
CTD small phosphatase-like protein	4	1	280	0.00357747
EP300-interacting inhibitor of differentiation 3	1	1	333	0.003003
WD repeat and HMG-box DNA-binding protein 1	6	1	966	0.00106291
metalloreductase STEAP3	7	1	485	0.00206316
piwi-like protein 3	2	1	877.5	0.00113963
ubiquitin carboxyl-terminal hydrolase 20	6	1	914	0.00109409
nucleoporin p58/p45	5	1	480.4	0.00225873
phosphatidylinositol-binding clathrin assembly protein	34	1	628.794	0.00159624
echinoderm microtubule-associated protein-like 1	4	1	813.5	0.00123052
glutathione-specific gamma-glutamylcyclotransferase 2	2	1	156	0.00662364
RNA-binding protein with multiple splicing	2	1	188	0.00546782
tyrosyl-DNA phosphodiesterase 1	16	1	599.125	0.00172476
cTAGE family member 15	1	1	777	0.001287
zinc finger protein 468	3	1	510.667	0.00196544
magnesium transporter NIPA2	40	1	354.3	0.00282421
cullin-4A	10	1	660.8	0.00151788
T-complex protein 1 subunit zeta	2	1	508.5	0.00197043
SH3 domain-containing protein 19	24	1	889.292	0.00114896
calsyntenin-1	3	1	971.333	0.00102958
calcium-dependent secretion activator 2	26	1	1256.92	0.000797352
sperm protein associated with the nucleus on the X chromosome N4	3	1	137.333	0.0076269
von Willebrand factor A domain-containing protein 8	2	1	1472	0.000743699
bromodomain-containing protein 9	15	1	556.8	0.00182618
UDP-GlcNAc:betaGal beta-1,3-N-acetylglucosaminyltransferase-like protein 1	6	1	285.833	0.00415014
hornerin	1	1	2850	0.000350877
septin-5	2	1	357.5	0.0028001
uncharacterized protein C20orf194	5	1	877.6	0.00125068
DALR anticodon-binding domain-containing protein 3	5	1	508.6	0.00203197
pro-neuregulin-3, membrane-bound	18	1	668.722	0.00158088
peptidase M20 domain-containing protein 2	7	1	295.571	0.00355779
phosphoinositide 3-kinase regulatory subunit 6	13	1	695.462	0.00146124
transmembrane protein 201	6	1	599.667	0.00180298
tudor domain-containing protein 6	2	1	2081	0.000480563
protein FAM83B	5	1	1011	0.00098912
zinc finger protein 780A	15	1	648	0.00154344
sodium-dependent neutral amino acid transporter SLC6A17	2	1	727	0.00137552
protein LEG1 homolog	1	1	330	0.0030303
golgin subfamily A member 7B	1	1	167	0.00598802
protein THEMIS	9	1	590.222	0.00171213
protein FAM171A1	4	1	790	0.00132625
ras-related protein Rap-1A	5	1	184	0.00543478
lipase member J	7	1	344.714	0.0029161
ras-related protein Rap-1b	3	1	168.333	0.00605628
zyxin	2	1	572	0.00174825
interferon-induced protein with tetratricopeptide repeats 1B	1	1	474	0.0021097
homocysteine-responsive endoplasmic reticulum-resident ubiquitin-like domain member 1 protein	2	1	390.5	0.00256082
sodium/glucose cotransporter 4	8	1	601.125	0.001701
C1GALT1-specific chaperone 1	2	1	318	0.00314465
sodium/hydrogen exchanger 4	2	1	783.5	0.00127676
CDK5 regulatory subunit-associated protein 2	9	1	1760.78	0.000570605
zinc finger matrin-type protein 1	10	1	583.1	0.00177063
polycomb group RING finger protein 6	2	1	312.5	0.00324675
leukocyte cell-derived chemotaxin 1	6	1	341	0.00293968
XK-related protein 7	1	1	579	0.00172712
heterogeneous nuclear ribonucleoprotein A1-like 2	2	1	320	0.003125
PRAME family member 8	2	1	474	0.0021097
PRAME family member 7	1	1	474	0.0021097
protein SOGA3	1	1	947	0.00105597
arylsulfatase I	1	1	569	0.00175747
serpin I2	2	1	405	0.00246914
midkine	8	1	136	0.00755566
dnaJ homolog subfamily C member 21	6	1	579.667	0.00173624
spermatogenesis- and oogenesis-specific basic helix-loop-helix-containing protein 1	6	1	365.5	0.00276501
keratin-associated protein 5-6	1	1	129	0.00775194
keratin-associated protein 5-7	1	1	165	0.00606061
coiled-coil domain-containing protein 66	20	1	923.2	0.00108347
shadow of prion protein	1	1	151	0.00662252
keratin-associated protein 5-3	1	1	238	0.00420168
keratin-associated protein 5-4	2	1	258	0.00392909
solute carrier family 25 member 53	8	1	314.5	0.00318484
probable ATP-dependent RNA helicase DDX60-like	17	1	1600.47	0.00063885
olfactory receptor 8U8	1	1	319	0.0031348
fragile X mental retardation syndrome-related protein 1	12	1	574.667	0.00176325
protein Flattop	1	1	177	0.00564972
protein phosphatase 1 regulatory subunit 42	3	1	242	0.00416043
heterogeneous nuclear ribonucleoprotein C-like 1	1	1	293	0.00341297
TMF-regulated nuclear protein 1	2	1	227	0.00440529
putative peptidyl-tRNA hydrolase PTRHD1	1	1	140	0.00714286
SRR1-like protein	3	1	277.667	0.00370199
eIF-2-alpha kinase GCN2	1	1	1649	0.000606428
exocyst complex component 6	11	1	785.364	0.00127576
cysteine--tRNA ligase, cytoplasmic	4	1	838	0.00119407
zinc finger protein 638	4	1	1972.75	0.000506917
glycolipid transfer protein domain-containing protein 2	2	1	309	0.00324727
putative glycosyltransferase ALG1-like	10	1	187.7	0.00538696
DNA-3-methyladenine glycosylase	4	1	292.5	0.00342077
peptidyl-tRNA hydrolase 2, mitochondrial	3	1	179.333	0.00557625
aurora kinase C	3	1	291.333	0.0034403
dnaJ homolog subfamily C member 25	1	1	360	0.00277778
mRNA export factor	8	1	370	0.00270653
immunoglobulin superfamily member 11	21	1	418.333	0.00242118
adenylate kinase isoenzyme 6	2	1	170.5	0.00586556
E3 ubiquitin-protein ligase rififylin	1	1	363	0.00275482
transcription factor Sp3	3	1	757.333	0.00132276
long-chain fatty acid transport protein 6	3	1	619	0.00161551
sterile alpha motif domain-containing protein 3	11	1	512.364	0.00197131
SURP and G-patch domain-containing protein 2	8	1	1090.25	0.00091728
leucine-rich repeat-containing G-protein coupled receptor 6	13	1	858.385	0.0011705
E3 ubiquitin-protein transferase MAEA	11	1	369.909	0.00275915
cancer/testis antigen family 45 member A1	3	1	189	0.00529101
piggyBac transposable element-derived protein 2	5	1	541.2	0.00193958
cancer/testis antigen family 45 member A3	3	1	189	0.00529101
cancer/testis antigen family 45 member A6	3	1	189	0.00529101
DNA nucleotidylexotransferase	2	1	508.5	0.00196657
ankyrin repeat and BTB/POZ domain-containing protein BTBD11	8	1	830.125	0.00126034
proline-rich protein 5	6	1	357.167	0.00285223
zinc fingers and homeoboxes protein 1	2	1	873	0.00114548
coiled-coil domain-containing protein 58	4	1	132.5	0.00757404
protein OS-9	11	1	612.545	0.00164023
MARVEL domain-containing protein 3	2	1	405.5	0.00246639
V-type proton ATPase subunit S1-like protein	37	1	271.297	0.00379954
prolyl 4-hydroxylase subunit alpha-2	16	1	523.062	0.0019159
SH3 and PX domain-containing protein 2B	2	1	925	0.00108133
SH3 domain-binding protein 5	8	1	350.25	0.00295605
scm-like with four MBT domains protein 2	4	1	894	0.00111857
6-phosphofructo-2-kinase/fructose-2,6-bisphosphatase 2	5	1	491.4	0.00203738
low-density lipoprotein receptor-related protein 8	15	1	830	0.00124116
very low-density lipoprotein receptor	4	1	838.5	0.00119365
apoptosis-inducing factor 3	3	1	602.333	0.00166025
FERM and PDZ domain-containing protein 2	3	1	1090	0.00100662
little elongation complex subunit 2	10	1	853.6	0.00126014
acylpyruvase FAHD1, mitochondrial	3	1	232.667	0.00430711
zinc finger protein 749	5	1	740.4	0.00135475
zinc finger protein 805	2	1	560.5	0.00180959
protein S100-A13	12	1	98	0.0102041
TM2 domain-containing protein 2	7	1	177.143	0.00568009
serine/threonine-protein kinase SBK1	2	1	441	0.00227095
transcription factor HES-3	1	1	186	0.00537634
uncharacterized protein C7orf66	1	1	115	0.00869565
leucine-rich repeat-containing protein 66	1	1	880	0.00113636
fez family zinc finger protein 1	4	1	450	0.0022291
rab-3A-interacting protein	9	1	354	0.00310472
SH3 domain-containing kinase-binding protein 1	18	1	628	0.0016106
nibrin	9	1	588.222	0.00176871
probable inactive ribonuclease-like protein 12	1	1	147	0.00680272
40S ribosomal protein S26	2	1	125	0.00805153
spectrin beta chain, erythrocytic	5	1	2289.8	0.000437232
lathosterol oxidase	2	1	299	0.00334448
double-stranded RNA-specific adenosine deaminase	13	1	1036.15	0.000982444
chitinase-3-like protein 2	6	1	371.833	0.0027064
tumor protein D52	6	1	222.167	0.00454535
UPF0524 protein C3orf70	1	1	250	0.004
ras-related protein Rab-12	1	1	244	0.00409836
high affinity cAMP-specific and IBMX-insensitive 3',5'-cyclic phosphodiesterase 8B	29	1	789.172	0.00127777
BTB/POZ domain-containing protein KCTD21	6	1	266	0.00376819
homeobox protein DBX1	1	1	343	0.00291545
ankyrin repeat domain-containing protein SOWAHB	1	1	793	0.00126103
zinc finger protein ZFAT	10	1	1198.5	0.000835159
cystinosin	12	1	300.5	0.00356369
phospholipase A-2-activating protein	4	1	656.25	0.00158356
protein FAM131B	9	1	317.556	0.00317332
polycomb protein SCMH1	31	1	566.484	0.00179029
RNA binding protein fox-1 homolog 2	46	1	407.304	0.00247
5'-nucleotidase domain-containing protein 3	2	1	462.5	0.00223867
inverted formin-2	2	1	1244.5	0.000803546
methylthioribose-1-phosphate isomerase	5	1	313.2	0.00331144
YTH domain-containing protein 1	4	1	722	0.0013853
ankyrin repeat and SOCS box protein 9	8	1	303.875	0.00335677
glycoprotein endo-alpha-1,2-mannosidase-like protein	3	1	348.667	0.00304601
transcription factor Maf	6	1	384.667	0.00260104
potassium channel subfamily U member 1	6	1	1019	0.000997792
nuclear receptor subfamily 2 group C member 1	8	1	520.25	0.00194711
zinc finger protein 174	5	1	309.2	0.00344393
serine/threonine-protein kinase 24	4	1	450.75	0.00223474
leucine carboxyl methyltransferase 1	2	1	306.5	0.00328912
kynureninase	5	1	401.8	0.00259325
membralin	7	1	631.143	0.00158616
cytochrome b-245 chaperone 1	10	1	190.3	0.00526738
polyadenylate-binding protein-interacting protein 2	5	1	127	0.00787402
GTP-binding protein SAR1b	2	1	198	0.00505051
mitochondrial Rho GTPase 1	20	1	627.8	0.00160379
serine/threonine-protein kinase Sgk3	4	1	488	0.00205089
ubiquitin-60S ribosomal protein L40	12	1	144.167	0.0070708
[truncated: 3,808 more rows]

## Sheet: isoform 2 cSCSs
isoform2個	isoform数	平均CommonSCSs	平均アミノ酸数	平均CommonSCSs/1AA
[truncated: 974 more rows]

[truncated: 2 more sheets: isoform 3 cSCSs, isoform 4 cSCSs]
